# Supplementary material
Source: PubMed Central journal article supplement (PMC3518132)

## SUPPLEMENTARY FIGURE 1a: Tissue expression of proteins regulated by ODPC in the detergent resistant lipid-rafts enriched fraction.

Purple horizontal lines indicate the median gene expression levels in all tissues as well as levels in tissues with higher expression ( times x median indicated in the left vertical axis). Data was obtained from BioGPS (biogps.org) [ Wu, C., Orozco, C., Boyer, J., et al (2009), Genome Biol 10, R130].

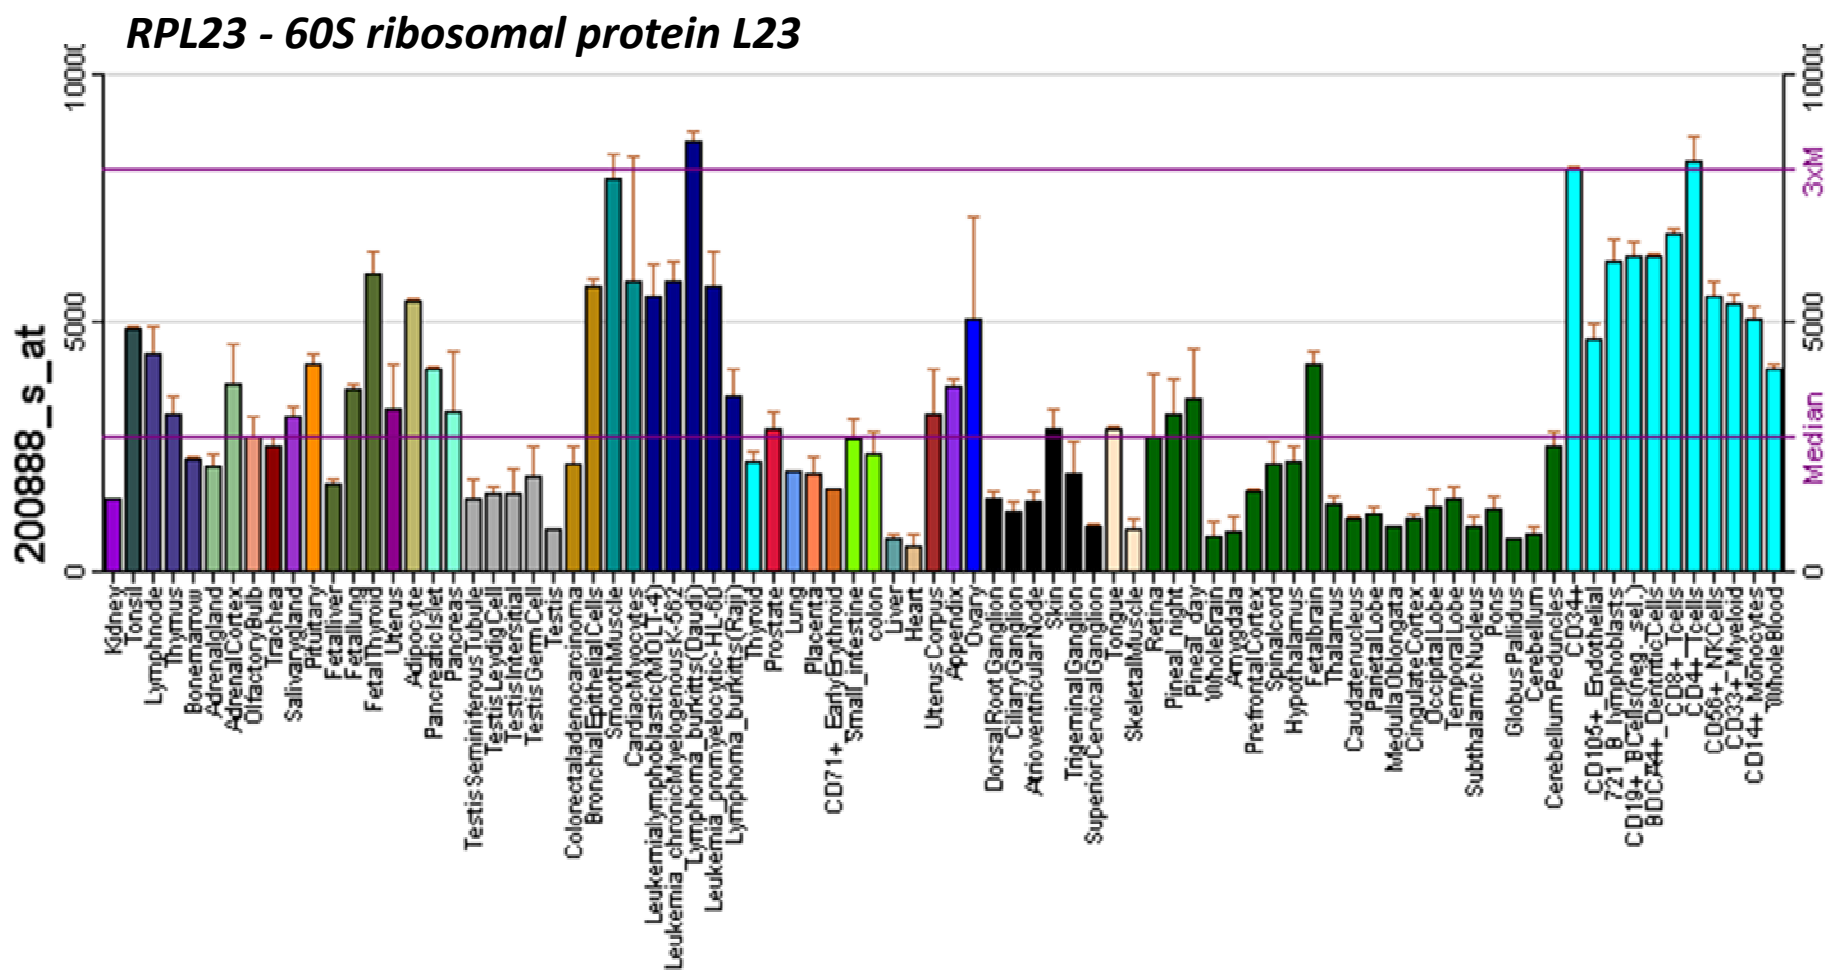

**SUPPLEMENTARY FIGURE 1b:** Tissue expression of proteins regulated by ODPC in the detergent resistant lipid-rafts enriched fraction.

Purple horizontal lines indicate the median gene expression levels in all tissues as well as levels in tissues with higher expression ( times x median indicated in the left vertical axis). Data was obtained from BioGPS (biogps.org) [ Wu, C., Orozco, C., Boyer, J., et al (2009), Genome Biol 10, R130].

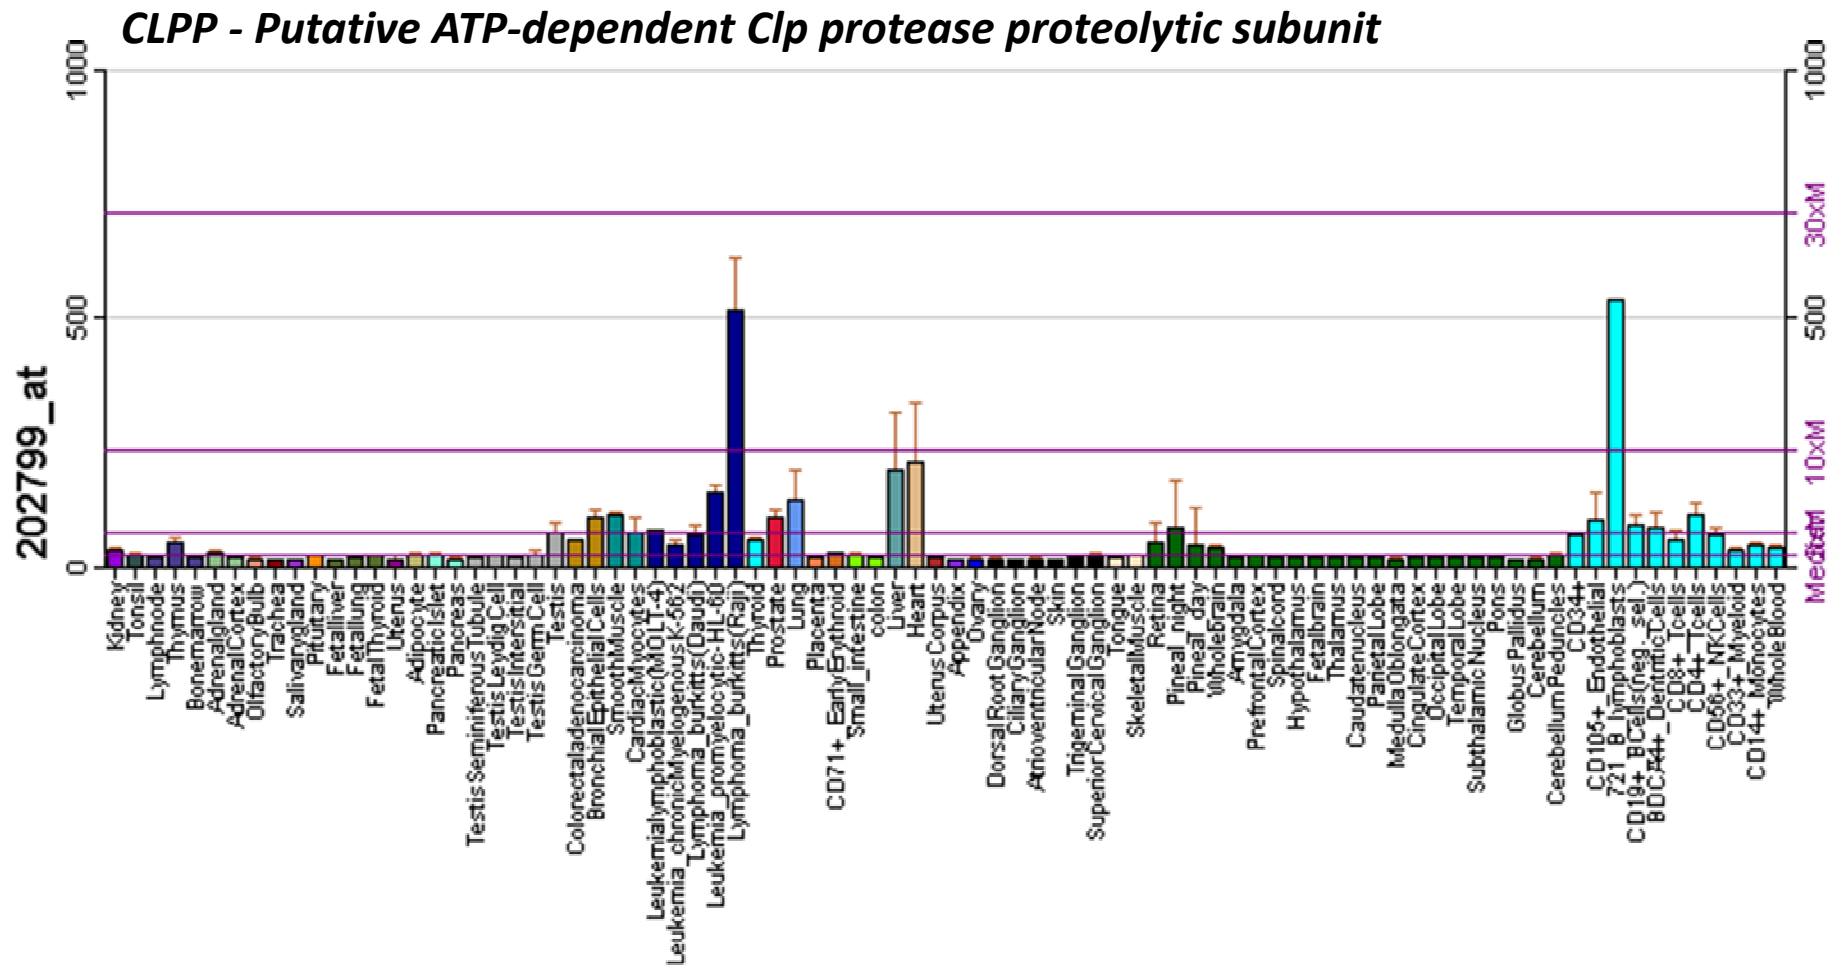

**SUPPLEMENTARY FIGURE 1c:** Tissue expression of proteins regulated by ODPc in the detergent resistant lipid-rafts enriched fraction.

Purple horizontal lines indicate the median gene expression levels in all tissues as well as levels in tissues with higher expression ( times x median indicated in the left vertical axis). Data was obtained from BioGPS (biogps.org) [ Wu, C., Orozco, C., Boyer, J., et al (2009), Genome Biol 10, R130].

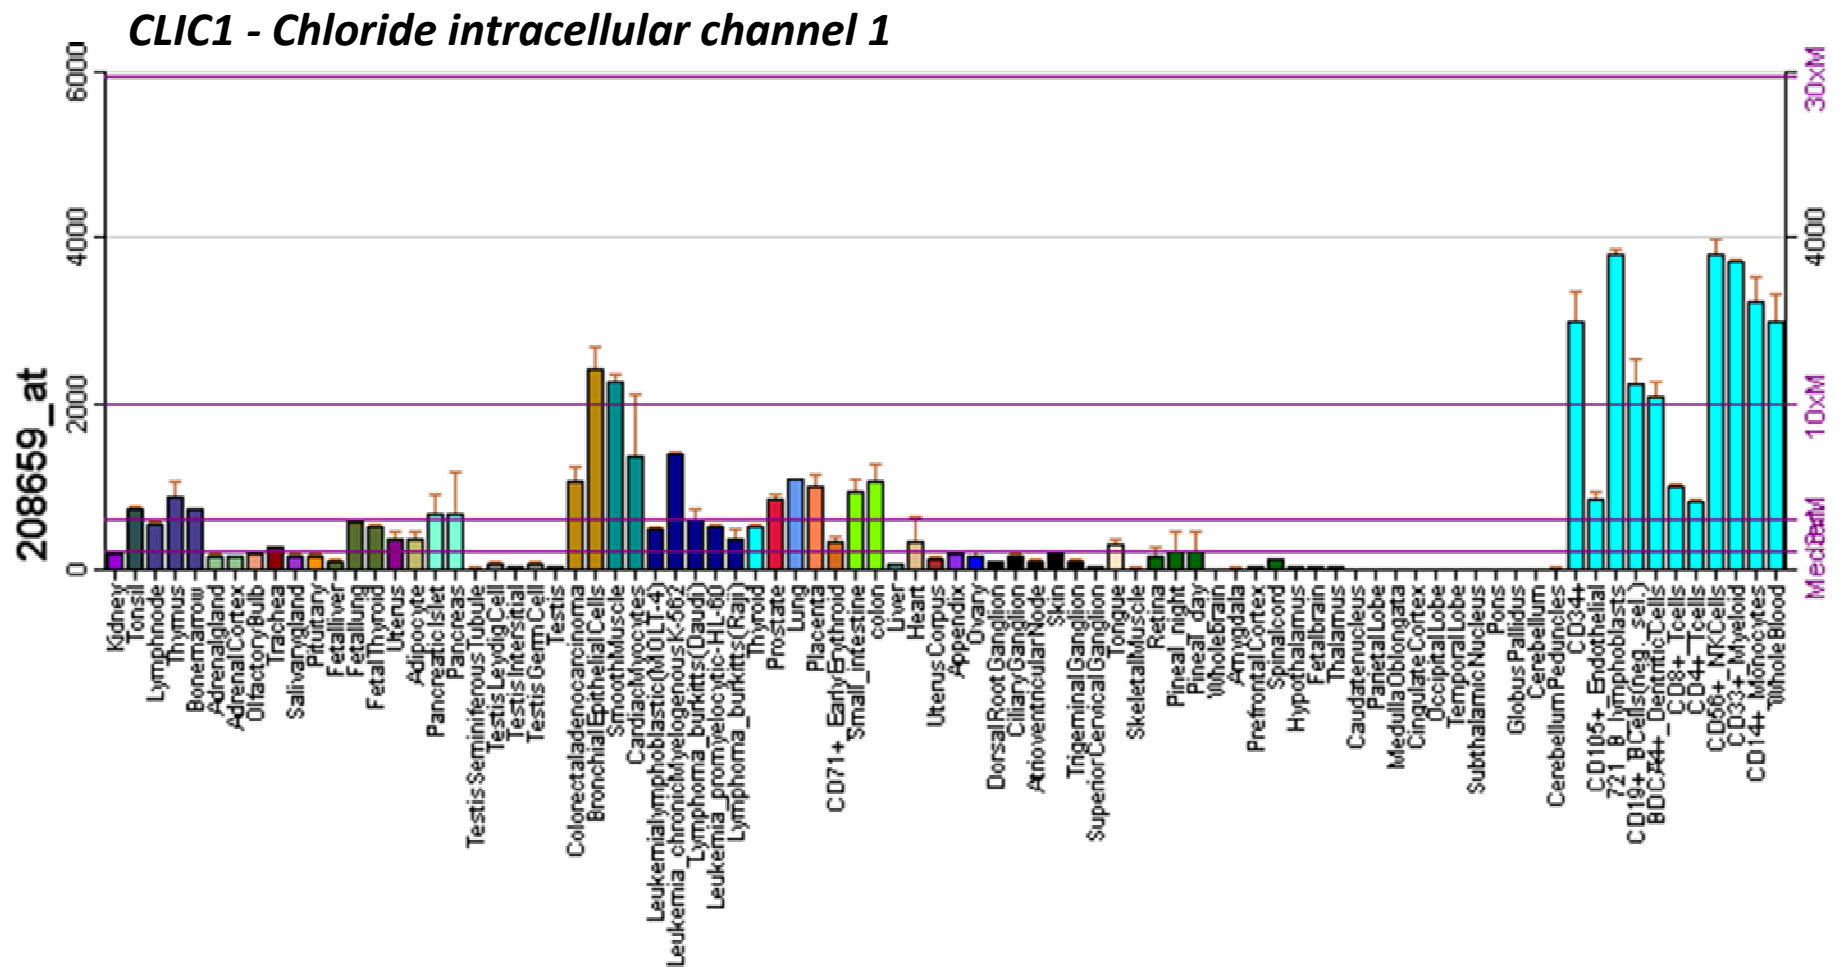

**SUPPLEMENTARY FIGURE 1d:** Tissue expression of proteins regulated by ODPC in the detergent resistant lipid-rafts enriched fraction.

Purple horizontal lines indicate the median gene expression levels in all tissues as well as levels in tissues with higher expression ( times x median indicated in the left vertical axis). Data was obtained from BioGPS (biogps.org) [ Wu, C., Orozco, C., Boyer, J., et al (2009), Genome Biol 10, R130].

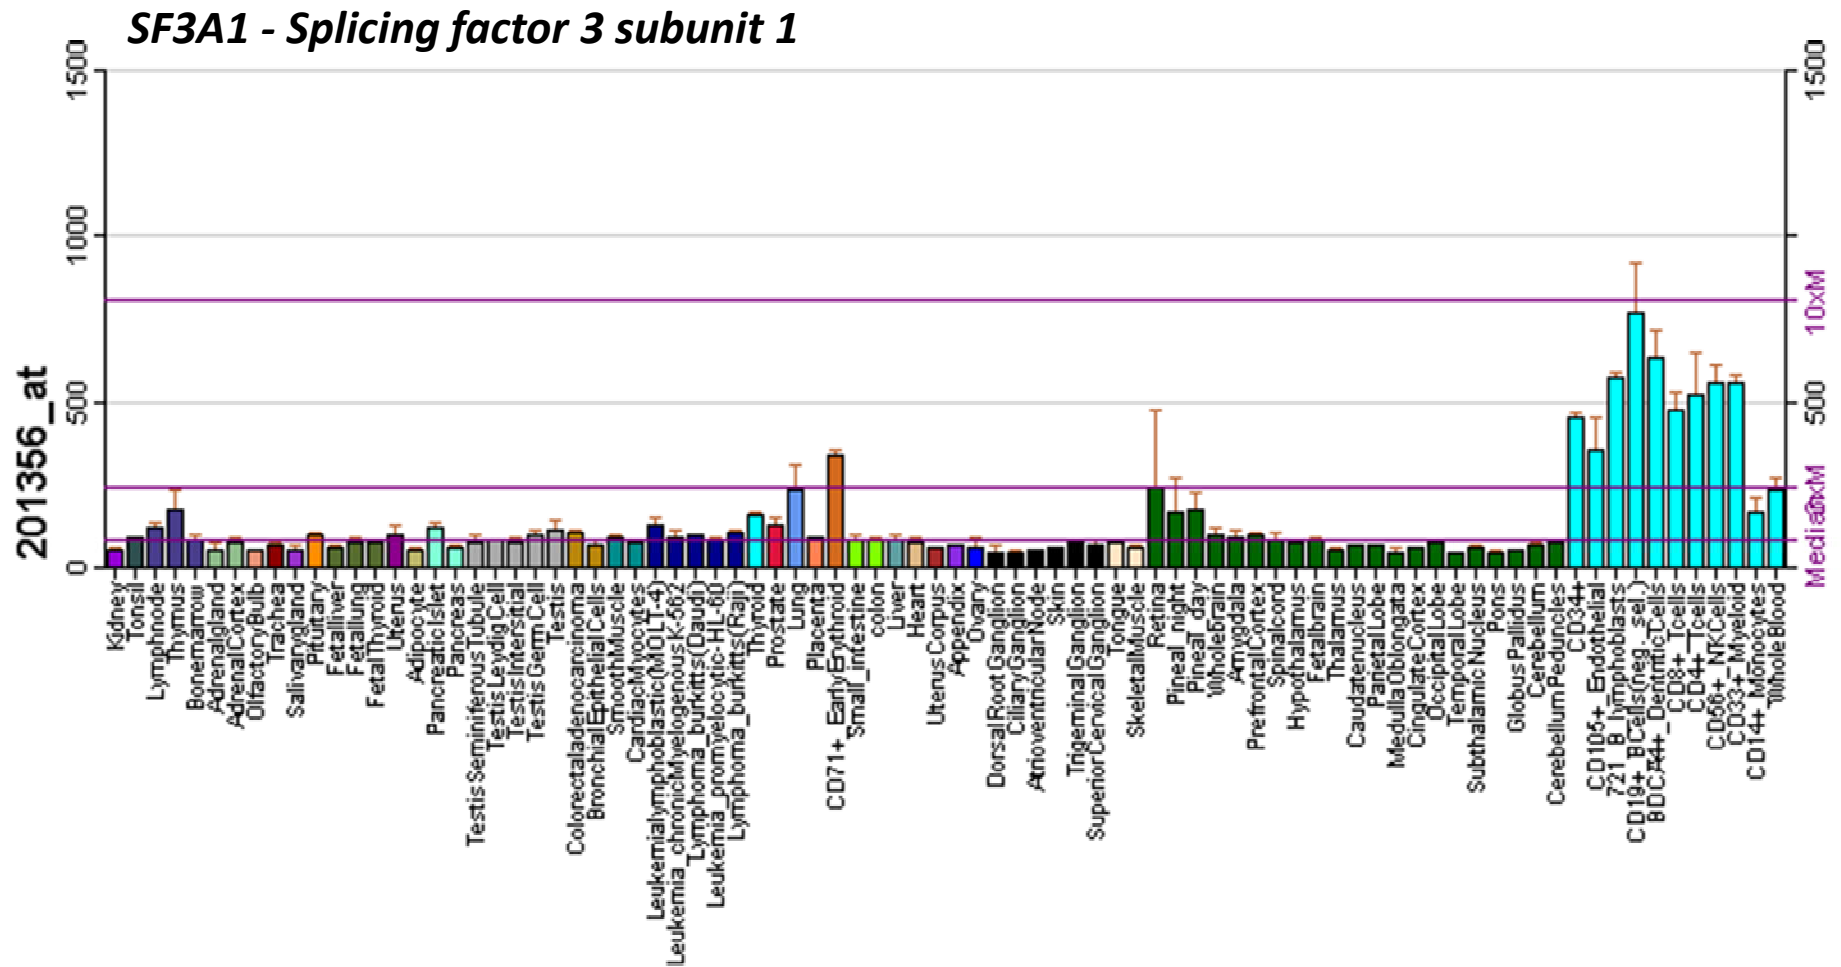

**SUPPLEMENTARY FIGURE 1e:** Tissue expression of proteins regulated by ODPC in the detergent resistant lipid-rafts enriched fraction.

Purple horizontal lines indicate the median gene expression levels in all tissues as well as levels in tissues with higher expression ( times x median indicated in the left vertical axis). Data was obtained from BioGPS (biogps.org) [ Wu, C., Orozco, C., Boyer, J., et al (2009), Genome Biol 10, R130].

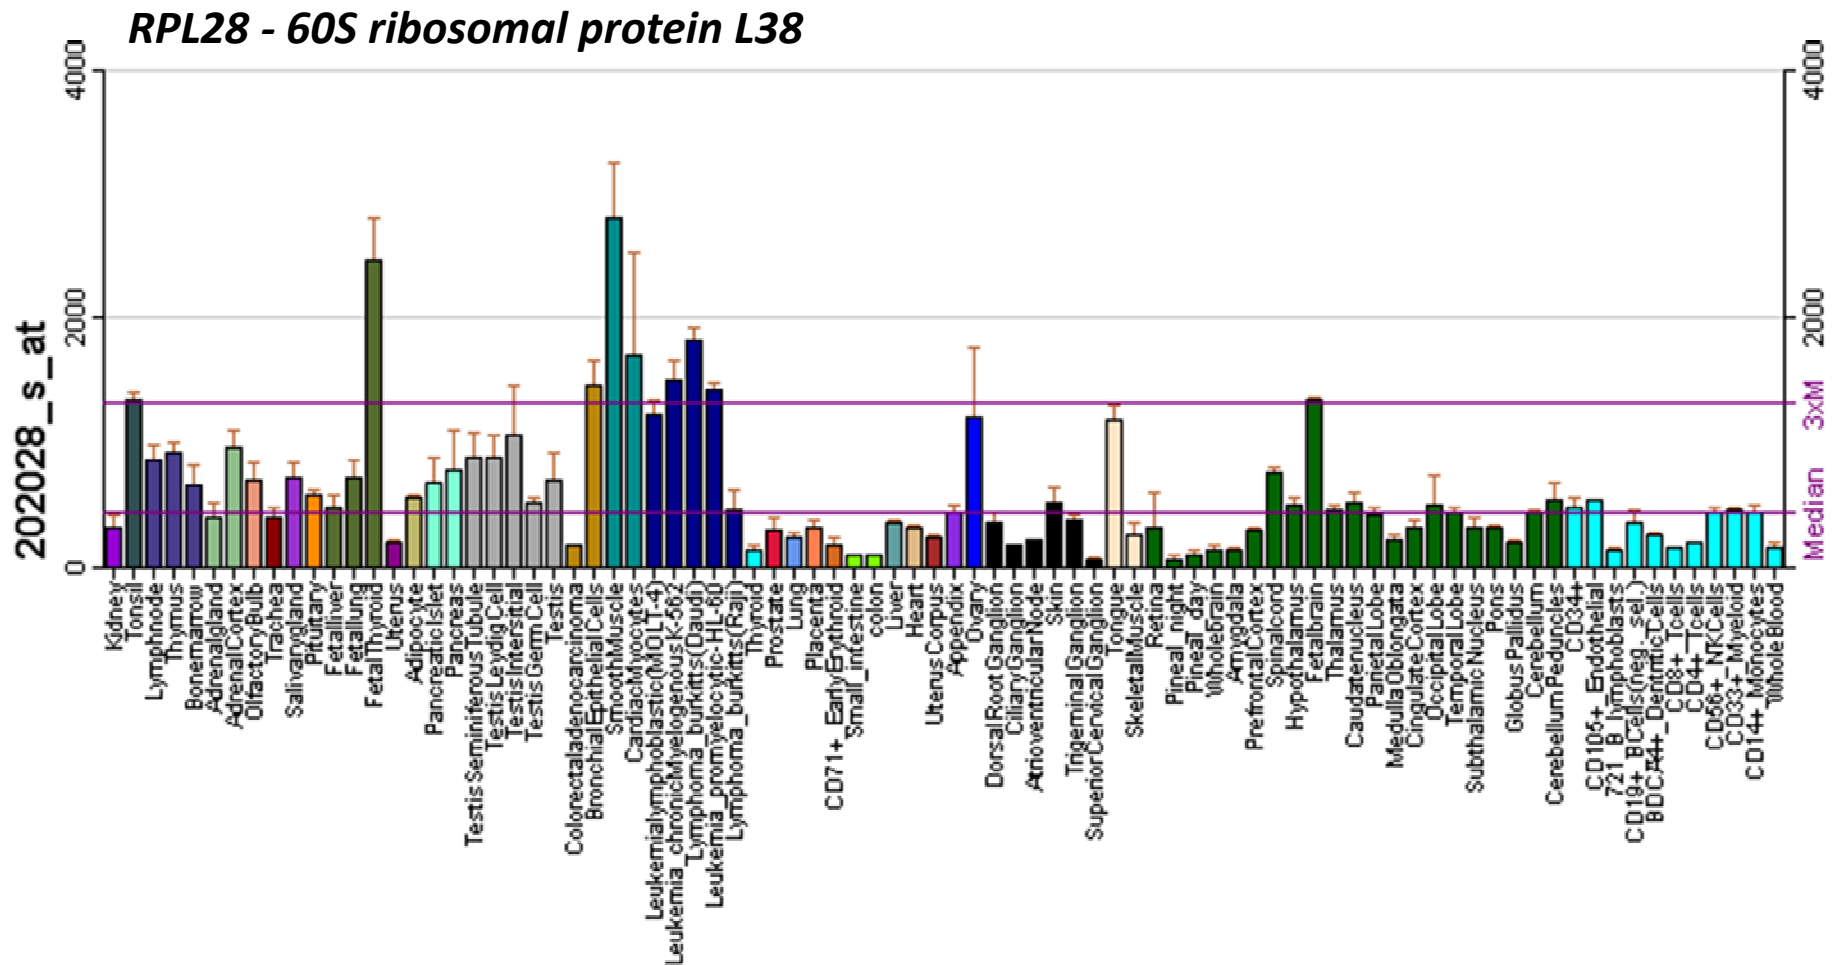

**SUPPLEMENTARY FIGURE 1f:** Tissue expression of proteins regulated by ODPc in the detergent resistant lipid-rafts enriched fraction.

Purple horizontal lines indicate the median gene expression levels in all tissues as well as levels in tissues with higher expression (times x median indicated in the left vertical axis). Note that LAT2 is almost 100 times more expressed (red arrow) in hematopoietic tissues in comparison to the median expression of LAT2 in all tissues measured. Data was obtained from BioGPS (biogps.org) [ Wu, C., Orozco, C., Boyer, J., et al (2009), Genome Biol 10, R130].

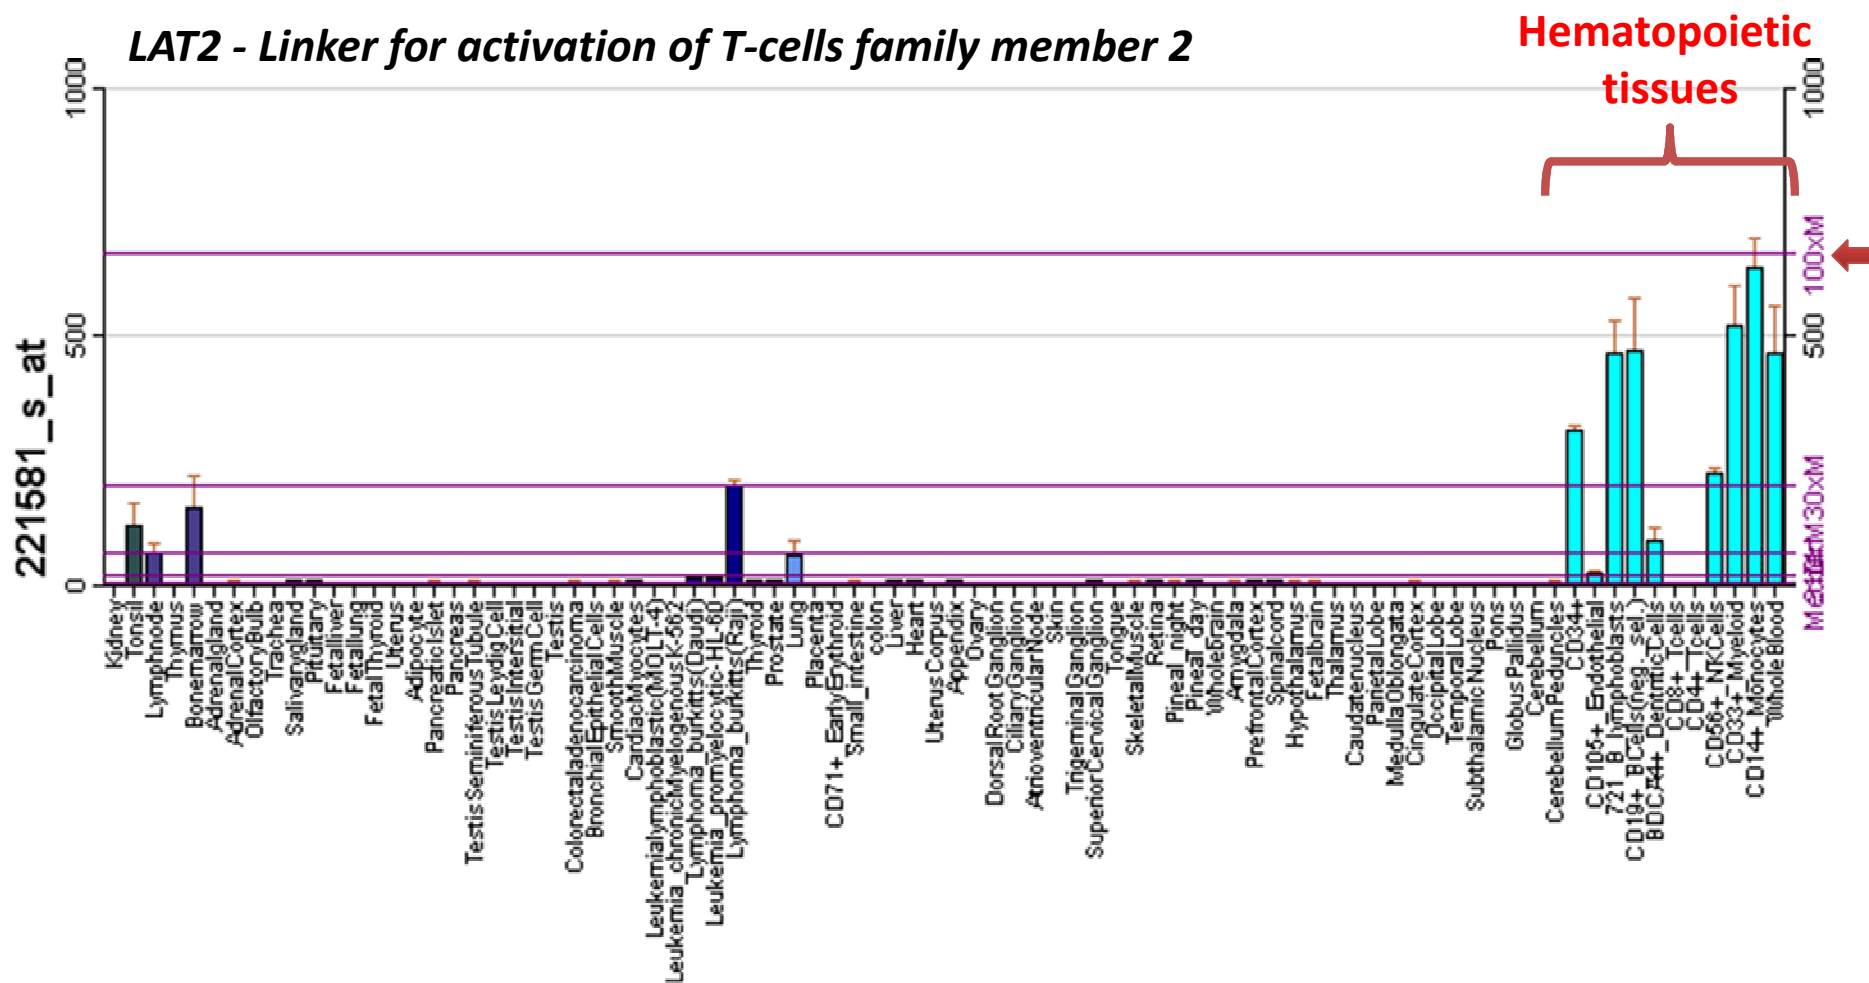

**SUPPLEMENTARY FIGURE 1g:** Tissue expression of proteins regulated by ODPC in the detergent resistant lipid-rafts enriched fraction.

Purple horizontal lines indicate the median gene expression levels in all tissues as well as levels in tissues with higher expression ( times x median indicated in the left vertical axis). Data was obtained from BioGPS (biogps.org) [ Wu, C., Orozco, C., Boyer, J., et al (2009), Genome Biol 10, R130].

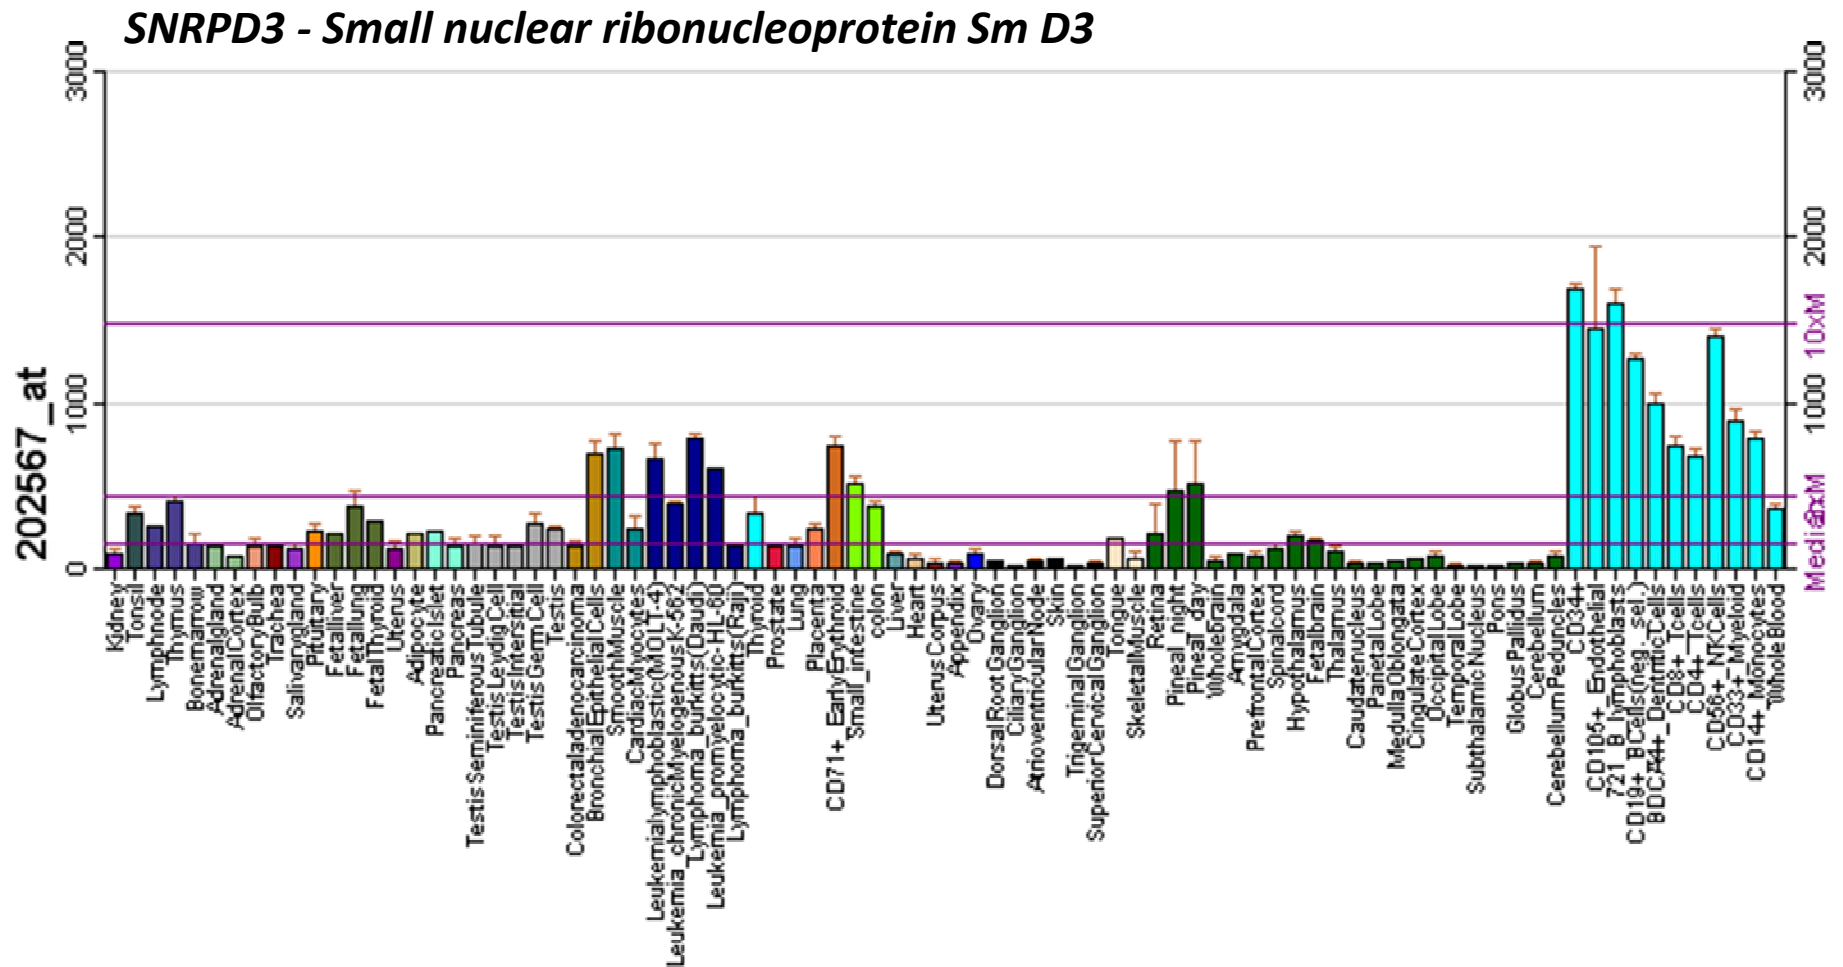

Supplement: supp_M112.019661_mcp.M112.019661-3.pdf [file supp_M112.019661_mcp.M112.019661-3.pdf]
