# Supplementary material
Source: PubMed Central journal article supplement (PMC3518132)

# LAT2, a lipid raft adaptor protein for AKT signaling, is an early mediator of alkylphospholipid anti-leukemic activity

Carolina H. Thomé, Guilherme A. dos Santos, Germano A. Ferreira, Priscila S. Scheucher, Clarice Izumi, Andreia M. Leopoldino, Ana Maria Simão, Pietro Ciancaglino, Kleber T. de Oliveira, Alice Chin, Samir M. Hanash, Roberto P. Falcão, Eduardo M. Rego, Lewis J. Greene, Vitor M. Faça

## ANNOTATED SPECTRA FOR SINGLE PEPTIDE HITS – PROTEIN IDENTIFICATION

*SPECTRA REPRESENT 317 PEPTIDES OBSERVED WITH PEPTIDE PROPHET SCORE ABOVE 0.8 IN THE IDENTIFICATION OF PROTEINS OF DETERGENT RESISTANT MEMBRANE FRACTIONS.*

*THE TABLE ON TOP OF EACH ANNOTATED SPECTRUM PRESENT THE PROTEIN (IPI NUMBER), GENE NAME, CHARGE STATE, PEPTIDE PROPHET SCORE AND PEPTIDE SEQUENCE. SPECTRUM FIGURE IS ANNOTATED WITH b AND y IONS MATCHED.*

| Protein Probab. | Protein                                                                                     | Tot. Peptides | Unique Peptides | Best Gene Name                                    | Scan # | Charge | Delta Mass | Peptide Prophet Score | Peptide Sequence              |
|-----------------|---------------------------------------------------------------------------------------------|---------------|-----------------|---------------------------------------------------|--------|--------|------------|-----------------------|-------------------------------|
| 0.9810          | IP100796966,<br>IP100433478,<br>IP100396582,<br>IP100746217,<br>IP100032449,<br>IP100294834 | 1             | 1               | ASPH,<br>ASPH,<br>ASPH,<br>ASPH,<br>ASPH,<br>ASPH | 630    | 2+     | -0.0288    | 0.9999                | K.SSGNSSSSGSGSGSTSAGSSSPGAR.R |

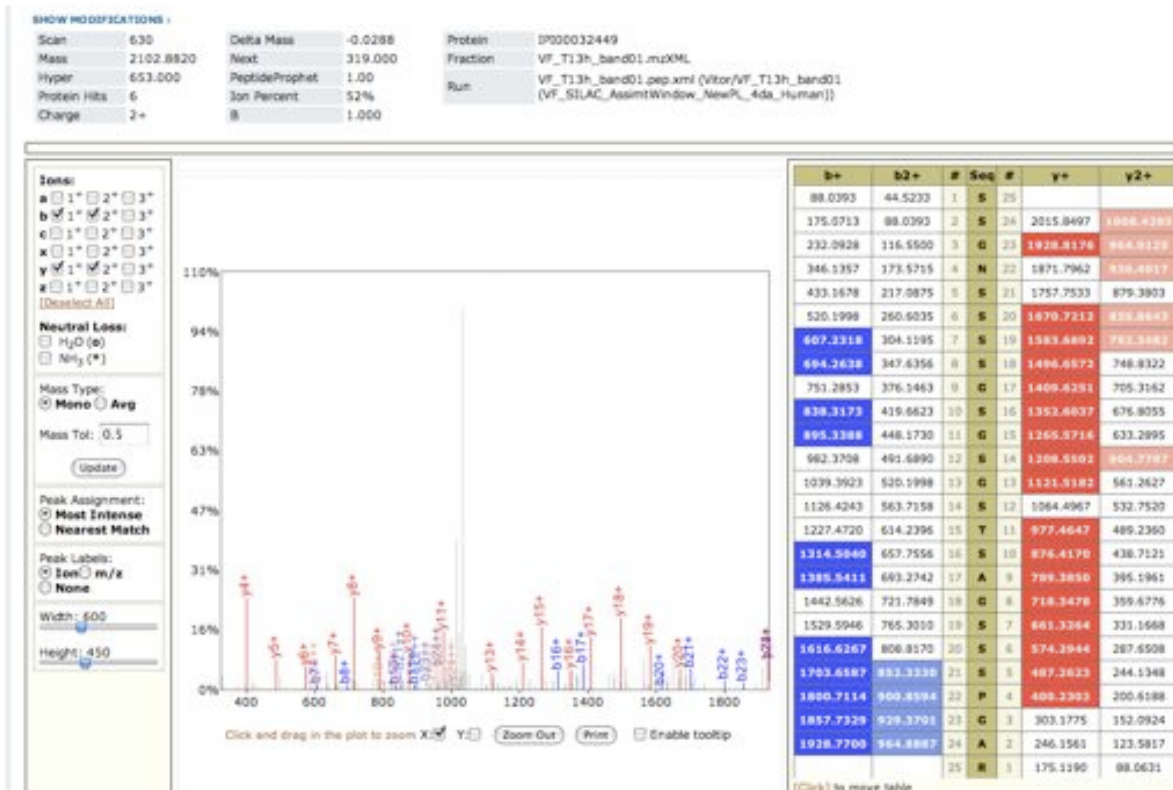

| Protein Probab. | Protein                                                                                     | Tot. Peptides | Unique Peptides | Best Gene Name                                                             | Scan # | Charge | Delta Mass | Peptide Prophet Score | Peptide Sequence  |
|-----------------|---------------------------------------------------------------------------------------------|---------------|-----------------|----------------------------------------------------------------------------|--------|--------|------------|-----------------------|-------------------|
| 0.9793          | IPI00465191,<br>IPI00900318,<br>IPI00900331,<br>IPI00183294,<br>IPI00900325,<br>IPI00646361 | 1             | 1               | DKFZp68<br>6J0330,<br>NUP214,<br>NUP214,<br>NUP214,<br>NUP214,<br>KIAA0023 | 645    | 2+     | -0.0219    | 0.9998                | R.VGQADDSTKPTNK.A |

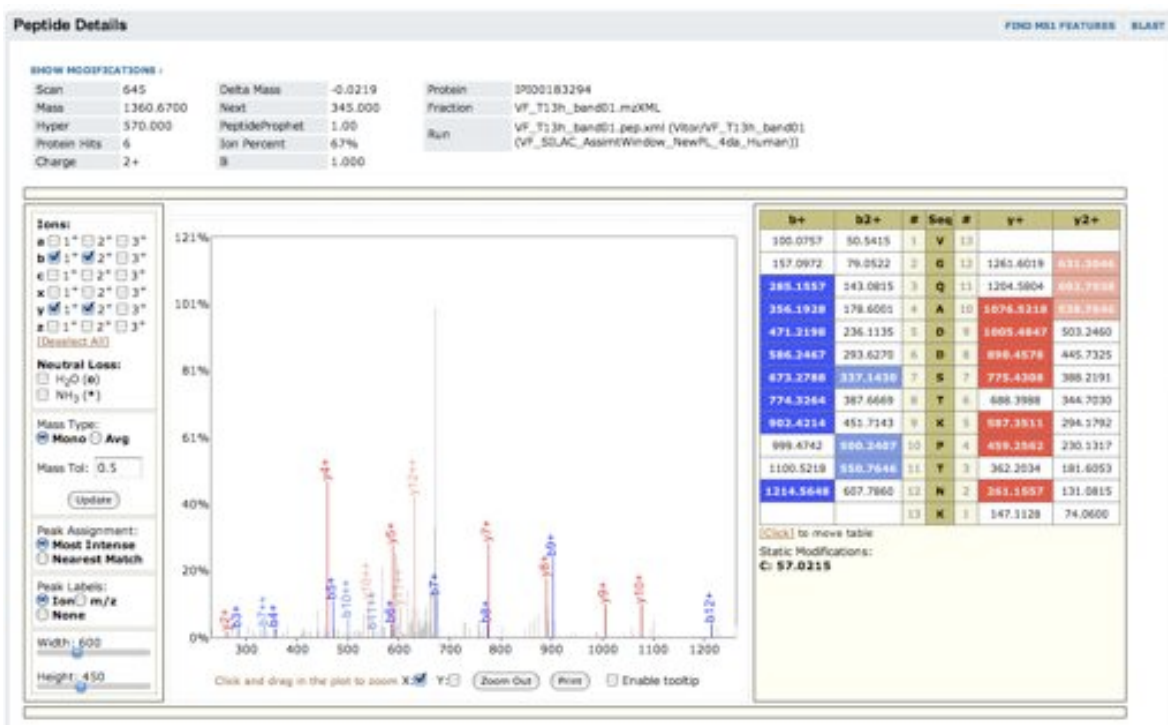



| Protein Probab. | Protein                     | Tot. Peptides | Unique Peptides | Best Gene Name      | Scan # | Charge | Delta Mass | Peptide Prophet Score | Peptide Sequence           |
|-----------------|-----------------------------|---------------|-----------------|---------------------|--------|--------|------------|-----------------------|----------------------------|
| 0.9851          | IPI00452747,<br>IPI00472939 | 1             | 1               | LOC653566,<br>SPCS2 | 714    | 2+     | 0.0226     | 1.0000                | R.SGGSGGCSGAGGASNCGTGSGR.S |

### Peptide Details

#### SHOW MODIFICATIONS

|              |           |                 |         |          |                                                                                      |
|--------------|-----------|-----------------|---------|----------|--------------------------------------------------------------------------------------|
| Scan         | 714       | Delta Mass      | -0.0226 | Protein  | IPI00452747                                                                          |
| Mass         | 1857.7200 | Next            | 291.000 | Fraction | VF_T13h_band04.mpXML                                                                 |
| Hyper        | 640.000   | Peptide/Prophet | 1.00    | Run      | VF_T13h_band04 pep.xml (Vikor/VF_T13h_band04 (VF_SILAC_AssayWindow_NewPL_4da_Human)) |
| Protein Hits | 2         | Ion Percent     | 74%     |          |                                                                                      |
| Charge       | 2+        | B               | 1.000   |          |                                                                                      |

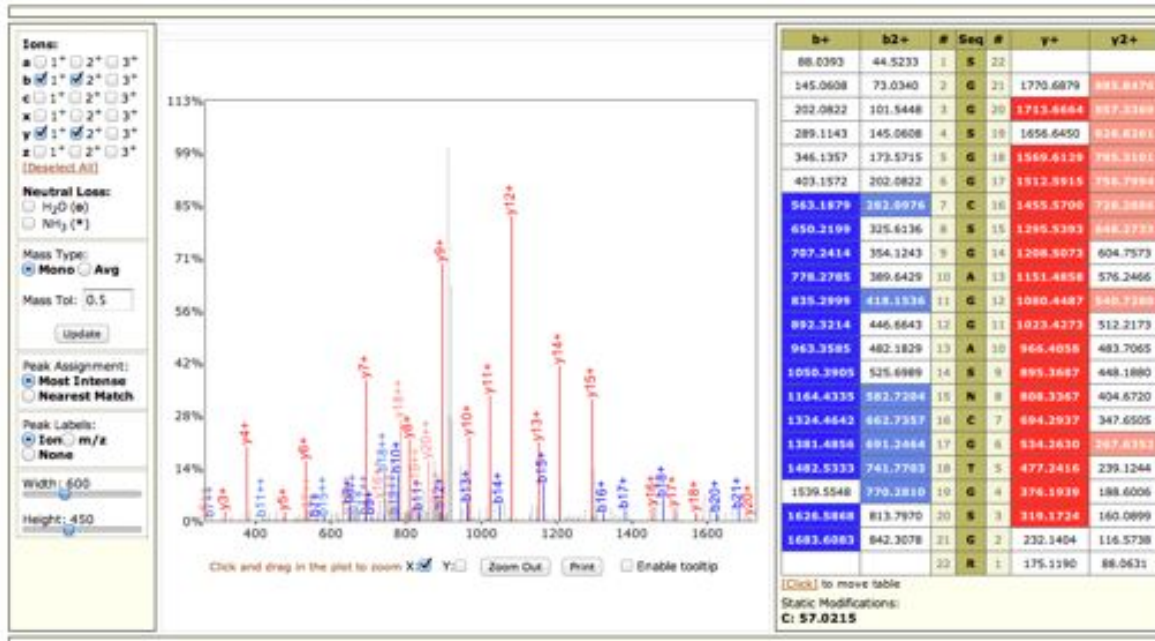

| Protein Probab. | Protein                                                                                     | Tot. Peptides | Unique Peptides | Best Gene Name                                       | Scan # | Charge | Delta Mass | Peptide Prophet Score | Peptide Sequence      |
|-----------------|---------------------------------------------------------------------------------------------|---------------|-----------------|------------------------------------------------------|--------|--------|------------|-----------------------|-----------------------|
| 0.9750          | IPI00911096,<br>IPI00759822,<br>IPI00759596,<br>IPI00909232,<br>IPI00216592,<br>IPI00477313 | 1             | 1               | -,<br>HNRNP<br>C,<br>HNRPC,<br>-,<br>HNRPC,<br>HNRPC | 755    | 2+     | -0.0179    | 0.9993                | K.NDK'SEEEEQSSSSVK'.K |

### Peptide Details

|                           |                                                                                     |                        |         |
|---------------------------|-------------------------------------------------------------------------------------|------------------------|---------|
| <b>SHOW MODIFICATIONS</b> |                                                                                     | <b>Peptide Details</b> |         |
| Scan                      | 755                                                                                 | Delta Mass             | -0.0179 |
| Mass                      | 1565.7330                                                                           | Next                   | 313.000 |
| Hyper                     | 582.000                                                                             | Peptide/Prophet        | 1.00    |
| Protein Hits              | 6                                                                                   | Ion Percent            | 85%     |
| Charge                    | 2+                                                                                  | B                      | 1.000   |
| Protein                   | IPI00216592                                                                         |                        |         |
| Fraction                  | VF_T13h_band04.mzXML                                                                |                        |         |
| Run                       | VF_T13h_band04.pep.xml (Ytor/VF_T13h_band04 [VF_SLAC_AssimtWindow_NewPL_4da_Human]) |                        |         |

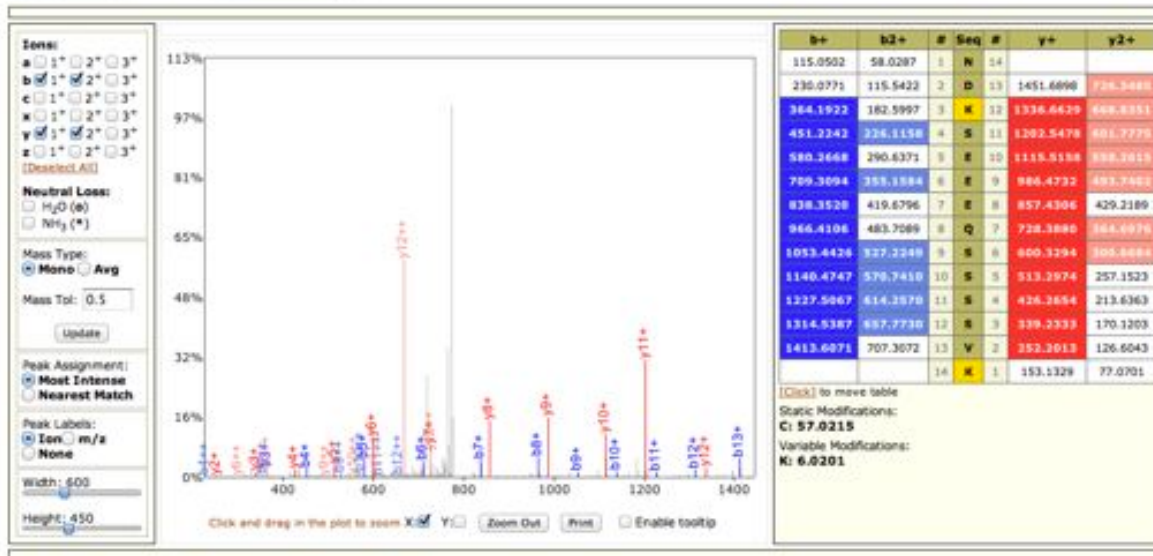

| Protein Probab. | Protein                                                     | Tot. Peptides | Unique Peptides | Best Gene Name                      | Scan # | Charge | Delta Mass | Peptide Prophet Score | Peptide Sequence    |
|-----------------|-------------------------------------------------------------|---------------|-----------------|-------------------------------------|--------|--------|------------|-----------------------|---------------------|
| 0.9810          | IPI00030136,<br>IPI00006196,<br>IPI00292771,<br>IPI00872028 | 1             | 1               | NUMA1,<br>NUMA1,<br>NUMA1,<br>NUMA1 | 759    | 2+     | -0.0142    | 0.9999                | K.AVQAQGGESQQEAQR.L |

### Peptide Details

SHOW MODIFICATIONS

|              |           |                 |         |          |                                                                                         |
|--------------|-----------|-----------------|---------|----------|-----------------------------------------------------------------------------------------|
| Scan         | 759       | Delta Mass      | -0.0142 | Protein  | IPI00006196                                                                             |
| Mass         | 1586.7520 | Next            | 346.000 | Fraction | VF_T13h_band01.mzXML                                                                    |
| Hyper        | 642.000   | Peptide/prophet | 1.00    | Run      | VF_T13h_band01.pep.xml (Vitor/VF_T13h_band01<br>[VF_SILAC_AssimWindow_NewPI_4da_Human]) |
| Protein Hits | 4         | Ion Percent     | 82%     |          |                                                                                         |
| Charge       | 2+        | B               | 1.000   |          |                                                                                         |

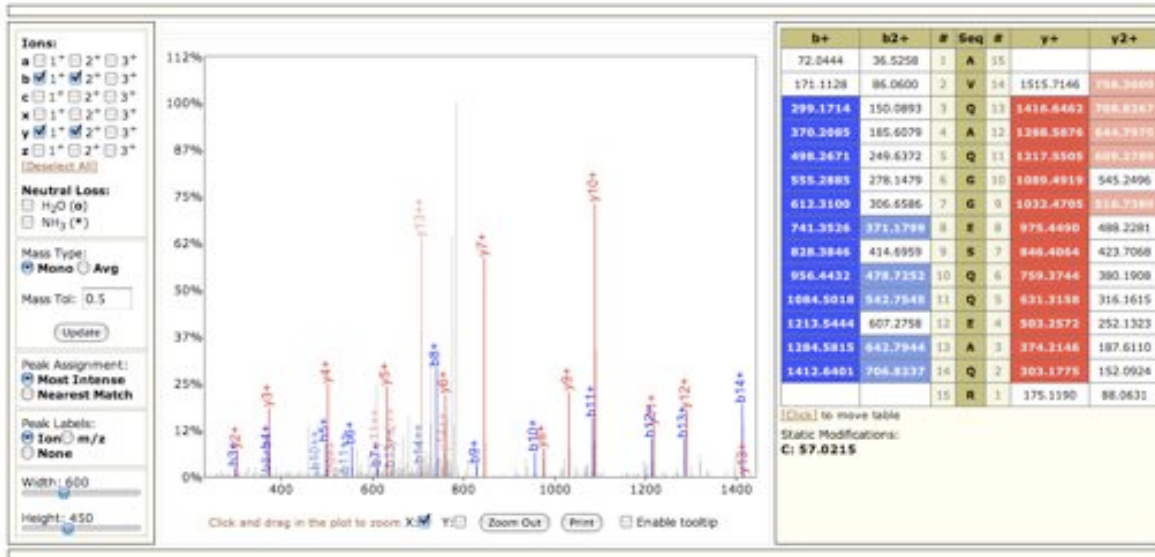

| Protein Probab. | Protein     | Tot. Peptides | Unique Peptides | Best Gene Name | Scan # | Charge | Delta Mass | Peptide Prophet Score | Peptide Sequence        |
|-----------------|-------------|---------------|-----------------|----------------|--------|--------|------------|-----------------------|-------------------------|
| 0.8545          | IP100026089 | 1             | 1               | SF3B1          | 778    | 2+     | -0.0069    | 0.9914                | R.GDTPGHATPGHGGATSSAR.K |

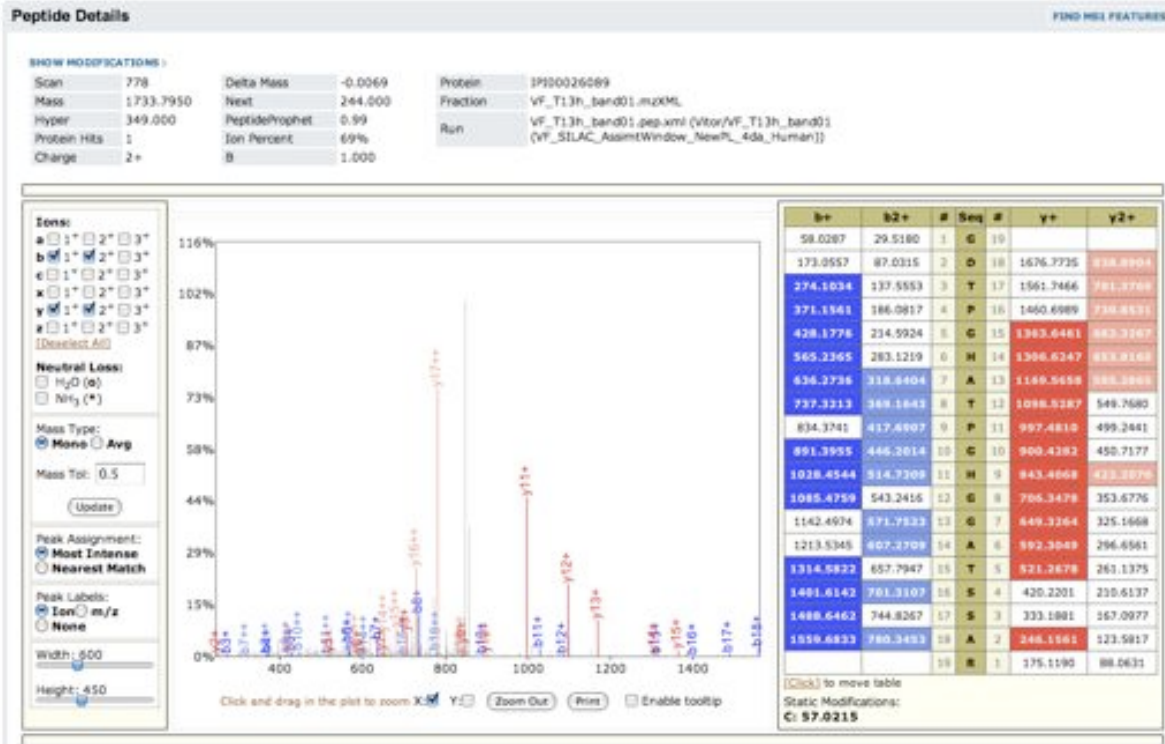



| Protein Probab. | Protein     | Tot. Peptides | Unique Peptides | Best Gene Name | Scan # | Charge | Delta Mass | Peptide Prophet Score | Peptide Sequence    |
|-----------------|-------------|---------------|-----------------|----------------|--------|--------|------------|-----------------------|---------------------|
| 0.9801          | IPI00017341 | 1             | 1               | SF3A2          | 800    | 2+     | -0.0191    | 0.9999                | K.TGSGGGVASSSESNR.D |

### Peptide Details

#### SHOW MODIFICATIONS

|              |           |                 |         |          |                                                                                     |
|--------------|-----------|-----------------|---------|----------|-------------------------------------------------------------------------------------|
| Scan         | 800       | Delta Mass      | -0.0191 | Protein  | IPI00017341                                                                         |
| Mass         | 1295.5820 | Next            | 280.000 | Fraction | VF_T13h_band02.mzXML                                                                |
| Hyper        | 510.000   | Peptide/Prophet | 1.00    | Run      | VF_T13h_band02.pep.xml (View/VF_T13h_band02 (VF_SILAC_AssmtWindow_NewPL_4ds_Human)) |
| Protein Hits | 1         | Ion Percent     | 69%     |          |                                                                                     |
| Charge       | 2+        | B               | 1.000   |          |                                                                                     |

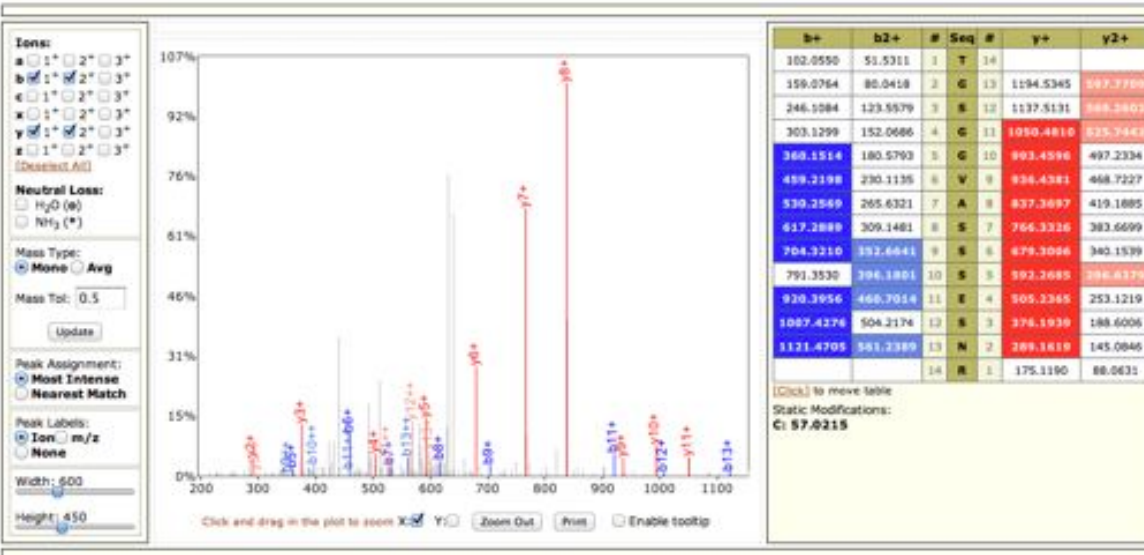

| Protein Probab. | Protein                     | Tot. Peptides | Unique Peptides | Best Gene Name  | Scan # | Charge | Delta Mass | Peptide Prophet Score | Peptide Sequence |
|-----------------|-----------------------------|---------------|-----------------|-----------------|--------|--------|------------|-----------------------|------------------|
| 0.9062          | IP100796848,<br>IP100005978 | 1             | 1               | SFRS2,<br>SFRS2 | 827    | 2+     | -0.0217    | 0.9925                | R.YGRPPDSHHSR.R  |

### Peptide Details

#### SHOW MODIFICATIONS

|                 |                      |                                                   |
|-----------------|----------------------|---------------------------------------------------|
| Scan: 827       | Delta Mass: -0.0217  | Protein: IP100005978                              |
| Mass: 1308.6190 | Next: 299.000        | Fraction: VF_T13h_band03.mz00%                    |
| Hyper: 399.000  | PeptideProphet: 0.99 | Run: VF_T13h_band03.pep.xml (Vitor/VF_T13h_band03 |
| Protein Hits: 2 | Ion Percent: 75%     | (VF_S2LAC_AssimtWindow_NewPL_4ds_Human))          |
| Charge: 2+      | B: 1.000             |                                                   |

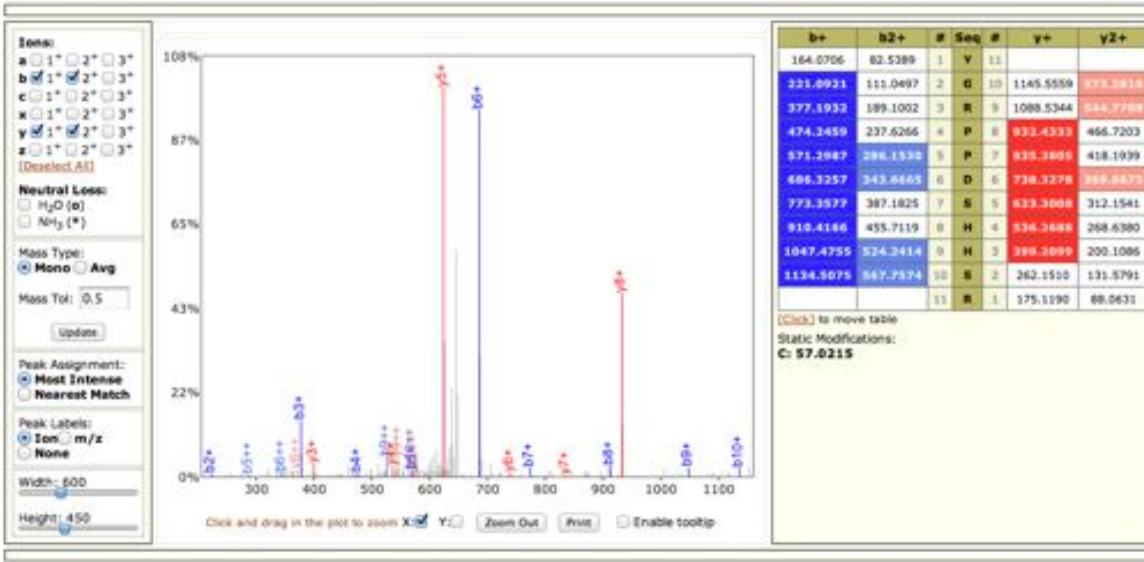

| Protein Probab. | Protein                                                     | Tot. Peptides | Unique Peptides | Best Gene Name                                                      | Scan # | Charge | Delta Mass | Peptide Prophet Score | Peptide Sequence      |
|-----------------|-------------------------------------------------------------|---------------|-----------------|---------------------------------------------------------------------|--------|--------|------------|-----------------------|-----------------------|
| 0.9881          | IPI00412714,<br>IPI00470498,<br>IPI00470497,<br>IPI00410693 | 1             | 1               | RP11-102M16.2,<br>RP11-102M16.2,<br>RP11-102M16.2,<br>RP11-102M16.2 | 851    | 2+     | -0.0151    | 0.9999                | K.SAAQAAAQTNSNAAGK'.Q |

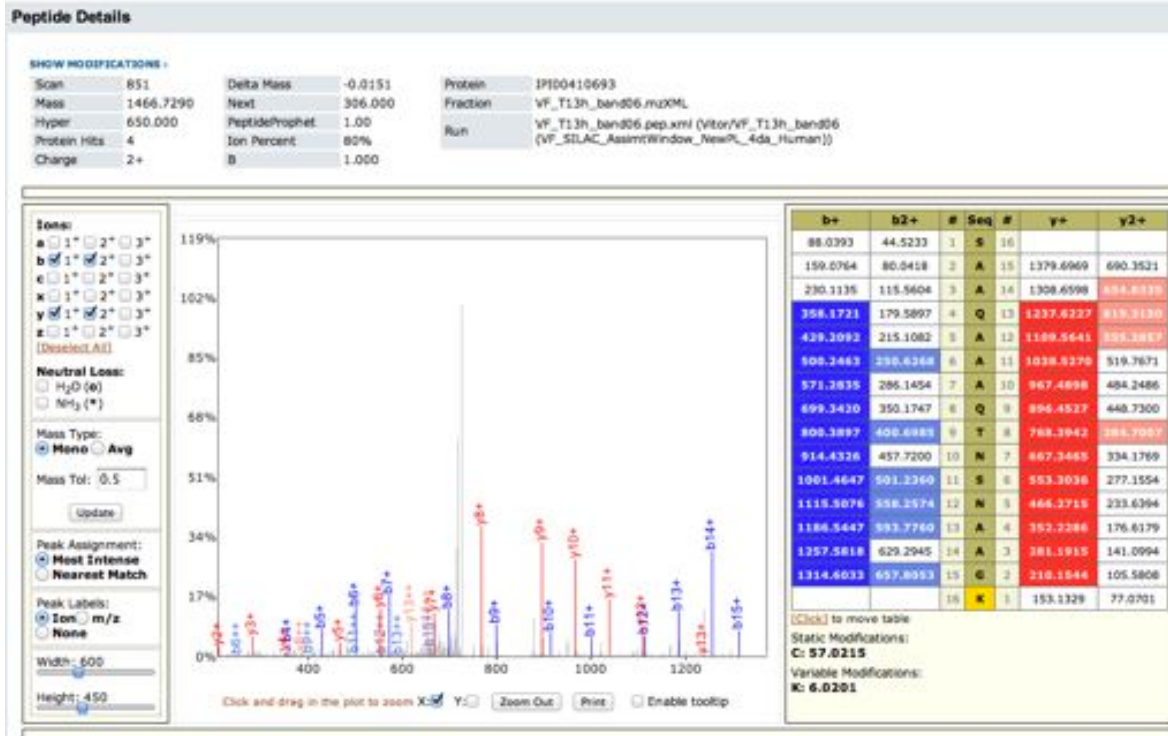

| Protein Probab. | Protein     | Tot. Peptides | Unique Peptides | Best Gene Name | Scan # | Charge | Delta Mass | Peptide Prophet Score | Peptide Sequence        |
|-----------------|-------------|---------------|-----------------|----------------|--------|--------|------------|-----------------------|-------------------------|
| 0.9560          | IP100026089 | 1             | 1               | SF3B1          | 873    | 2+     | -0.0221    | 0.9972                | R.GDTPGHATPGHGGATSSAR.K |

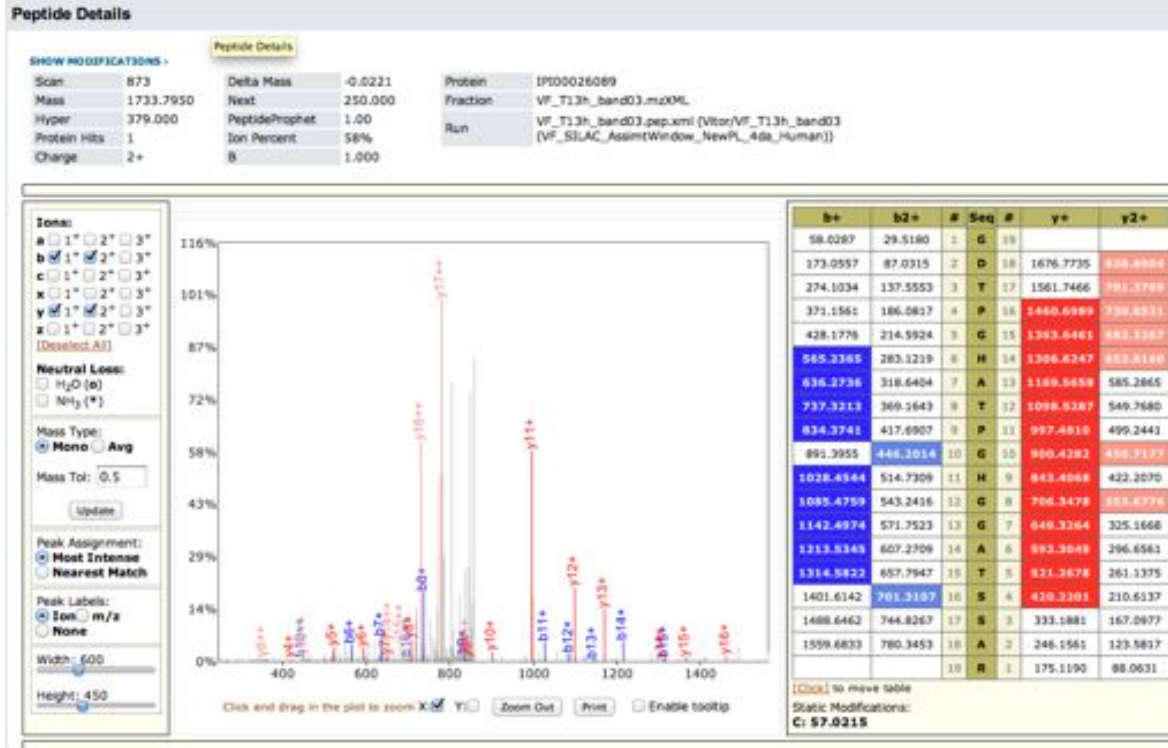



| Protein Probab. | Protein     | Tot. Peptides | Unique Peptides | Best Gene Name | Scan # | Charge | Delta Mass | Peptide Prophet Score | Peptide Sequence  |
|-----------------|-------------|---------------|-----------------|----------------|--------|--------|------------|-----------------------|-------------------|
| 0.9478          | IP100478231 | 1             | 1               | RHOA           | 892    | 2+     | -0.0175    | 0.9966                | K.M"KQEPVKPEEGR.D |

### Peptide Details

#### SHOW MODIFICATIONS

|              |           |                |         |          |                                                                                      |
|--------------|-----------|----------------|---------|----------|--------------------------------------------------------------------------------------|
| Scan         | 892       | Delta Mass     | -0.0175 | Protein  | IP100478231                                                                          |
| Mass         | 1443.7260 | Next           | 294.000 | Fraction | VF_T13h_band05.mzXML                                                                 |
| Hyper        | 465.000   | PeptideProphet | 1.00    | Run      | VF_T13h_band05.pep.xml (Vitor/VF_T13h_band05 (VF_SILAC_AssmtWindow_NewPL_4da_Human)) |
| Protein Hits | 1         | Ion Percent    | 68%     |          |                                                                                      |
| Charge       | 2+        | B              | 1.000   |          |                                                                                      |

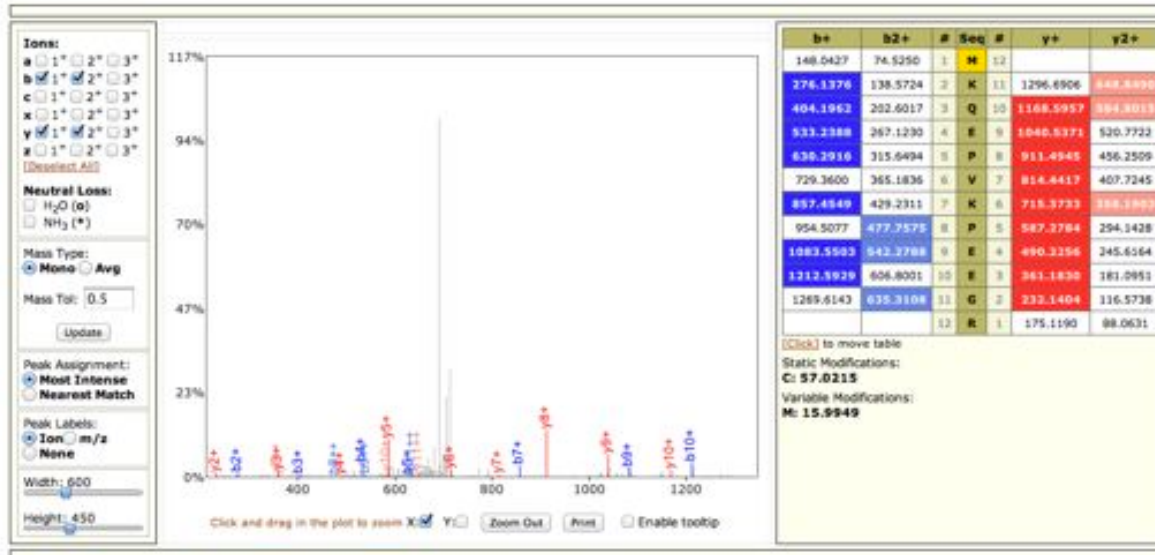

| Protein Probab. | Protein     | Tot. Peptides | Unique Peptides | Best Gene Name | Scan # | Charge | Delta Mass | Peptide Prophet Score | Peptide Sequence     |
|-----------------|-------------|---------------|-----------------|----------------|--------|--------|------------|-----------------------|----------------------|
| 0.8167          | IPI00479997 | 1             | 1               | STMN1          | 894    | 2+     | -0.0181    | 0.9809                | K.NK'ESK'DPADETEAD.- |

### Peptide Details

#### SHOW MODIFICATIONS -

|              |           |                |         |          |                                                                                      |
|--------------|-----------|----------------|---------|----------|--------------------------------------------------------------------------------------|
| Scan         | 894       | Delta Mass     | -0.0181 | Protein  | IPI00479997                                                                          |
| Mass         | 1560.7060 | Next           | 286.000 | Fraction | VF_T13h_band06.mzXML                                                                 |
| Hyper        | 428.000   | PeptideProphet | 0.98    | Run      | VF_T13h_band06.pep.xml (Vitor/VF_T13h_band06 (VF_SILAC_AssmtWindow_NewPL_4ds_Human)) |
| Protein Hits | 1         | Ion Percent    | 77%     |          |                                                                                      |
| Charge       | 2+        | B              | 1.000   |          |                                                                                      |

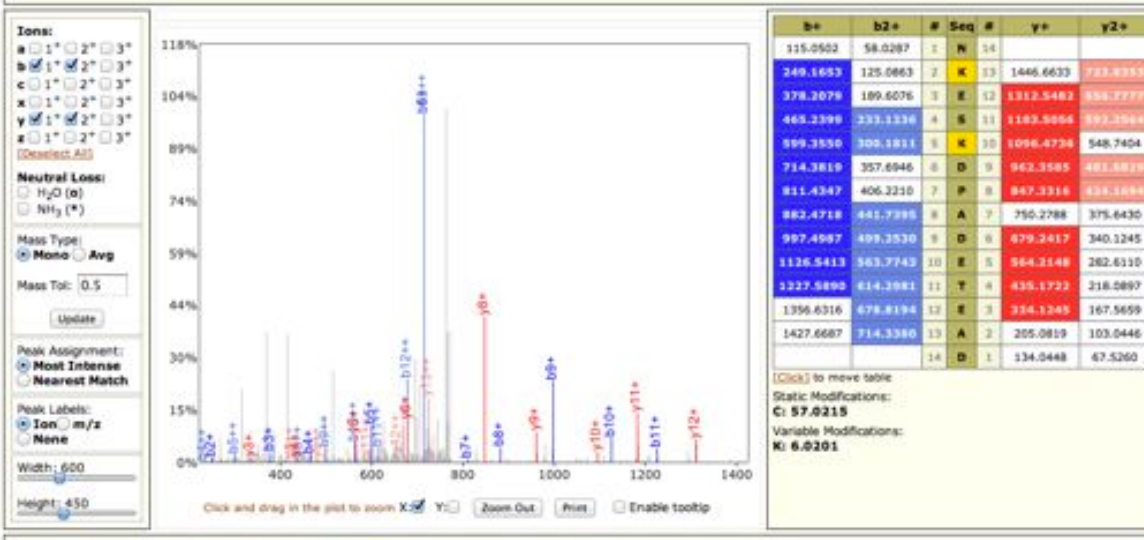

| Protein Probab. | Protein                                                                                                                                     | Tot. Peptides | Unique Peptides | Best Gene Name                                                                                  | Scan # | Charge | Delta Mass | Peptide Prophet Score | Peptide Sequence |
|-----------------|---------------------------------------------------------------------------------------------------------------------------------------------|---------------|-----------------|-------------------------------------------------------------------------------------------------|--------|--------|------------|-----------------------|------------------|
| 0.9278          | IPI00645757,<br>IPI00877802,<br>IPI00552530,<br>IPI00645329,<br>IPI00879702,<br>IPI00877934,<br>IPI00328319,<br>IPI00395865,<br>IPI00646512 | 1             | 1               | RBBP4,<br>RBBP4,<br>RBBP7,<br>RBBP4,<br>RBBP7,<br>RBBP4,<br>RBBP4,<br>RBBP7,<br>RBBP7,<br>RBBP4 | 898    | 2+     | -0.0128    | 0.9968                | K.INHEGEVNR.A    |

### Peptide Details

#### SHOW MODIFICATIONS

|              |           |                |         |          |                                                                                      |
|--------------|-----------|----------------|---------|----------|--------------------------------------------------------------------------------------|
| Scan         | 898       | Delta Mass     | -0.0128 | Protein  | IPI00328319                                                                          |
| Mass         | 1067.5230 | Next           | 320.600 | Fraction | VF_T13h_band02.mzML                                                                  |
| Hyper        | 438.000   | PeptideProphet | 1.00    | Run      | VF_T13h_band02.pep.xml (Vitor/VF_T13h_band02 (VF_S0LAC_AssimWindow_NewPL_40a_Human)) |
| Protein Hits | 9         | Ion Percent    | 88%     |          |                                                                                      |
| Charge       | 2+        | B              | 1.000   |          |                                                                                      |

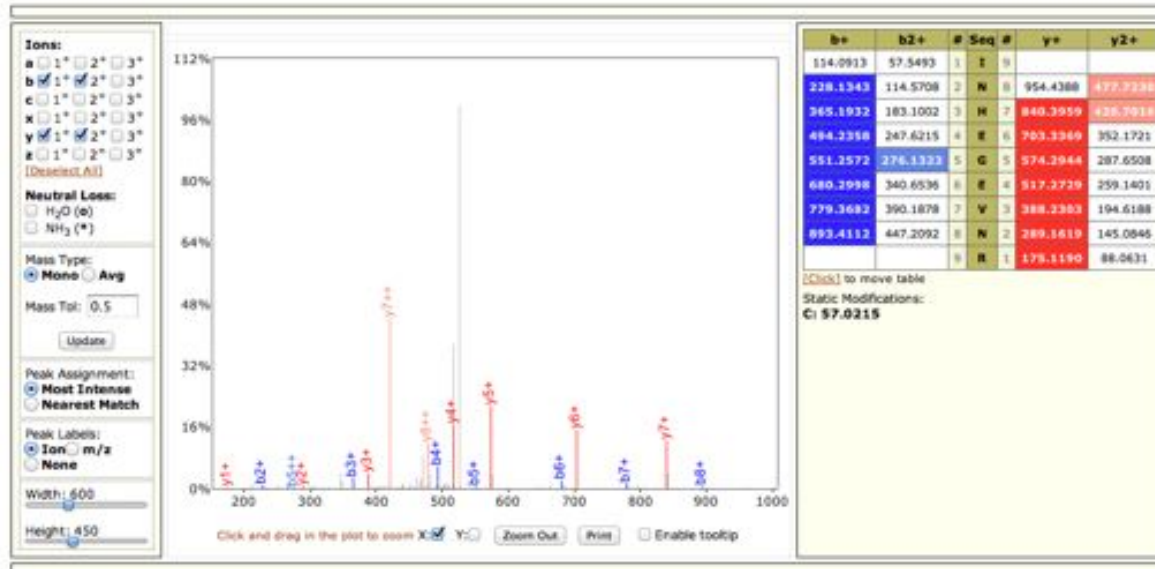



| Protein Probab. | Protein     | Tot. Peptides | Unique Peptides | Best Gene Name | Scan # | Charge | Delta Mass | Peptide Prophet Score | Peptide Sequence  |
|-----------------|-------------|---------------|-----------------|----------------|--------|--------|------------|-----------------------|-------------------|
| 0.9161          | IPI00478231 | 1             | 1               | RHOA           | 901    | 2+     | -0.0157    | 0.9927                | K.M"KQEPVKPEEGR.D |

### Peptide Details

#### SHOW MODIFICATIONS

|              |           |                |         |          |                                              |
|--------------|-----------|----------------|---------|----------|----------------------------------------------|
| Scan         | 901       | Delta Mass     | -0.0157 | Protein  | IPI00478231                                  |
| Mass         | 1443.7260 | Next           | 291.600 | Fraction | VF_T13h_band06.mzXML                         |
| Hyper        | 469.000   | PeptideProphet | 0.99    | Run      | VF_T13h_band06 pep.xml (Vitor/VF_T13h_band06 |
| Protein Hits | 1         | Ion Percent    | 64%     |          | (VF_SILAC_AssimWindow_NewP_4da_Human)        |
| Charge       | 2+        | B              | 1.000   |          |                                              |

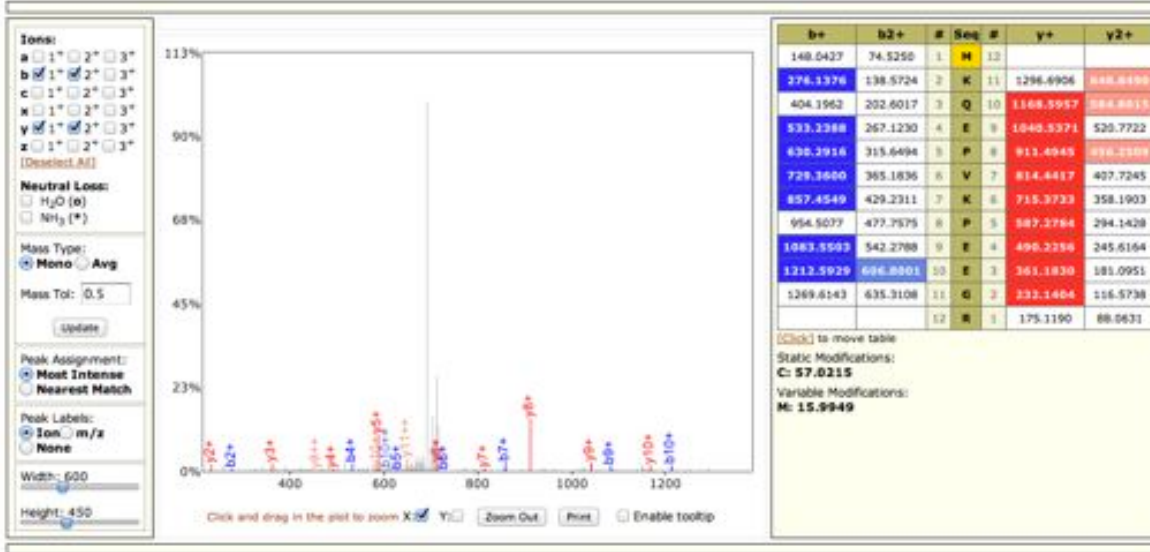

| Protein Probab. | Protein                     | Tot. Peptides | Unique Peptides | Best Gene Name | Scan # | Charge | Delta Mass | Peptide Prophet Score | Peptide Sequence |
|-----------------|-----------------------------|---------------|-----------------|----------------|--------|--------|------------|-----------------------|------------------|
| 0.9822          | IPI00642948,<br>IPI00253036 | 1             | 1               | CD99,<br>CD99  | 979    | 2+     | -0.0146    | 0.9998                | R.NANAEPAVQR.T   |

### Peptide Details

#### SHOW MODIFICATIONS -

|              |           |                |         |          |                                                                                         |
|--------------|-----------|----------------|---------|----------|-----------------------------------------------------------------------------------------|
| Scan         | 979       | Delta Mass     | -0.0146 | Protein  | IPI00253036                                                                             |
| Mass         | 1069.5360 | Next           | 374.000 | Fraction | VF_T13h_band04.mzXML                                                                    |
| Hyper        | 599.000   | PeptideProphet | 1.00    | Run      | VF_T13h_band04.pep.xml (Vitor/VF_T13h_band04<br>(VF_SILAC_AssimWindow_NewPL_4da_Human)) |
| Protein Hits | 2         | Ion Percent    | 94%     |          |                                                                                         |
| Charge       | 2+        | B              | 1.000   |          |                                                                                         |

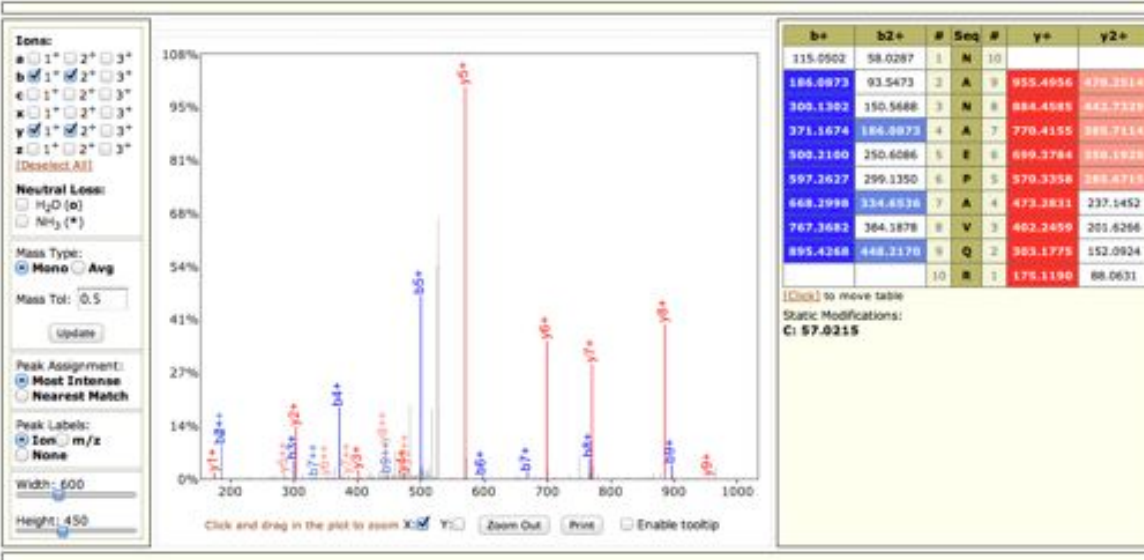





| Protein Probab. | Protein     | Tot. Peptides | Unique Peptides | Best Gene Name | Scan # | Charge | Delta Mass | Peptide Prophet Score | Peptide Sequence    |
|-----------------|-------------|---------------|-----------------|----------------|--------|--------|------------|-----------------------|---------------------|
| 0.9246          | IP100295889 | 1             | 1               | SRP19          | 1023   | 2+     | -0.0158    | 0.9936                | K.TGGADQSLQQGEGSK.K |

### Peptide Details

#### SHOW MODIFICATIONS

|              |           |                 |         |          |                                                                                        |
|--------------|-----------|-----------------|---------|----------|----------------------------------------------------------------------------------------|
| Scan         | 1023      | Delta Mass      | -0.0158 | Protein  | IP100295889                                                                            |
| Mass         | 1462.6770 | Next            | 203.000 | Fraction | VF_T13h_band06.mzXML                                                                   |
| Hyper        | 324.000   | Peptide Prophet | 0.99    | Run      | VF_T13h_band06.pep.xml (Vitor/VF_T13h_band06<br>{VF_SILAC_AssimWindow_NewP_4da_Human}) |
| Protein Hits | 1         | Ion Percent     | 71%     |          |                                                                                        |
| Charge       | 2+        | B               | 1.000   |          |                                                                                        |

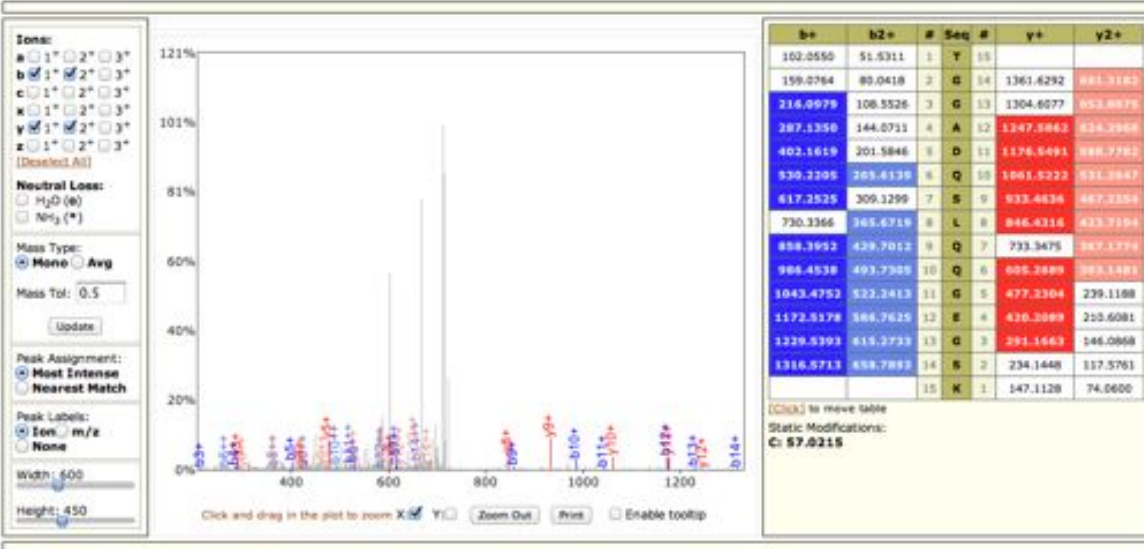

| Protein Probab. | Protein                     | Tot. Peptides | Unique Peptides | Best Gene Name | Scan # | Charge | Delta Mass | Peptide Prophet Score | Peptide Sequence   |
|-----------------|-----------------------------|---------------|-----------------|----------------|--------|--------|------------|-----------------------|--------------------|
| 0.9733          | IPI00793737,<br>IPI00218214 | 1             | 1               | NME6,<br>NME6  | 1034   | 2+     | -0.0077    | 0.9988                | R.NTTHGSDSVVSASR.E |

### Peptide Details

#### SHOW MODIFICATIONS

|              |           |                 |         |          |                                                                                         |
|--------------|-----------|-----------------|---------|----------|-----------------------------------------------------------------------------------------|
| Scan         | 1034      | Delta Mass      | -0.0077 | Protein  | IPI00218214                                                                             |
| Mass         | 1417.6666 | Next            | 243.000 | Fraction | VF_T13H_band05.mzXML                                                                    |
| Hyper        | 385.000   | Peptide Prophet | 1.00    | Run      | VF_T13H_band05 pep.xml (Vitor/VF_T13H_band05<br>(VF_SILAC_AssimWindow_NewPL_4da_Human)) |
| Protein Hits | 2         | Ion Percent     | 77%     |          |                                                                                         |
| Charge       | 2+        | B               | 0.000   |          |                                                                                         |

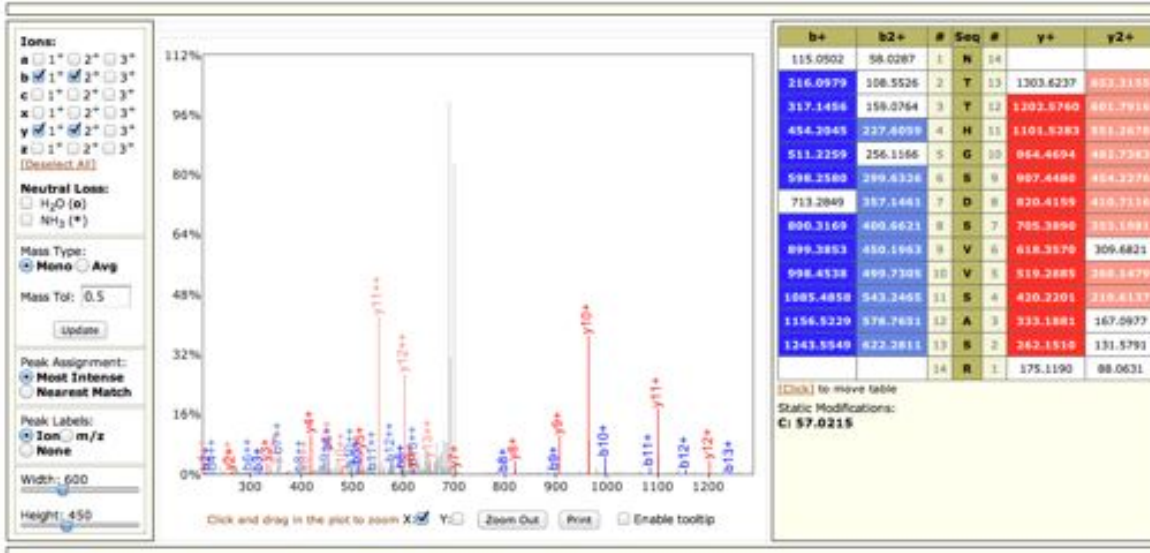

| Protein Probab. | Protein     | Tot. Peptides | Unique Peptides | Best Gene Name | Scan # | Charge | Delta Mass | Peptide Prophet Score | Peptide Sequence |
|-----------------|-------------|---------------|-----------------|----------------|--------|--------|------------|-----------------------|------------------|
| 0.8845          | IPI00291016 | 1             | 1               | NDUFV3         | 1035   | 2+     | 0.0180     | 0.9903                | R.KPEASHSFENR.A  |

### Peptide Details

#### SHOW MODIFICATIONS -

|              |           |                |         |          |                                                                                      |
|--------------|-----------|----------------|---------|----------|--------------------------------------------------------------------------------------|
| Scan         | 1035      | Delta Mass     | -0.0180 | Protein  | IPI00291016                                                                          |
| Mass         | 1301.6230 | Next           | 324.000 | Fraction | VF_T13h_band03.mzXML                                                                 |
| Hyper        | 414.000   | PeptideProphet | 0.99    | Run      | VF_T13h_band03.pep.xml (Vitor/VF_T13h_band03 (VF_SILAC_AssmtWindow_NewPL_4da_Human)) |
| Protein Hits | 1         | Ion Percent    | 70%     |          |                                                                                      |
| Charge       | 2+        | B              | 1.000   |          |                                                                                      |

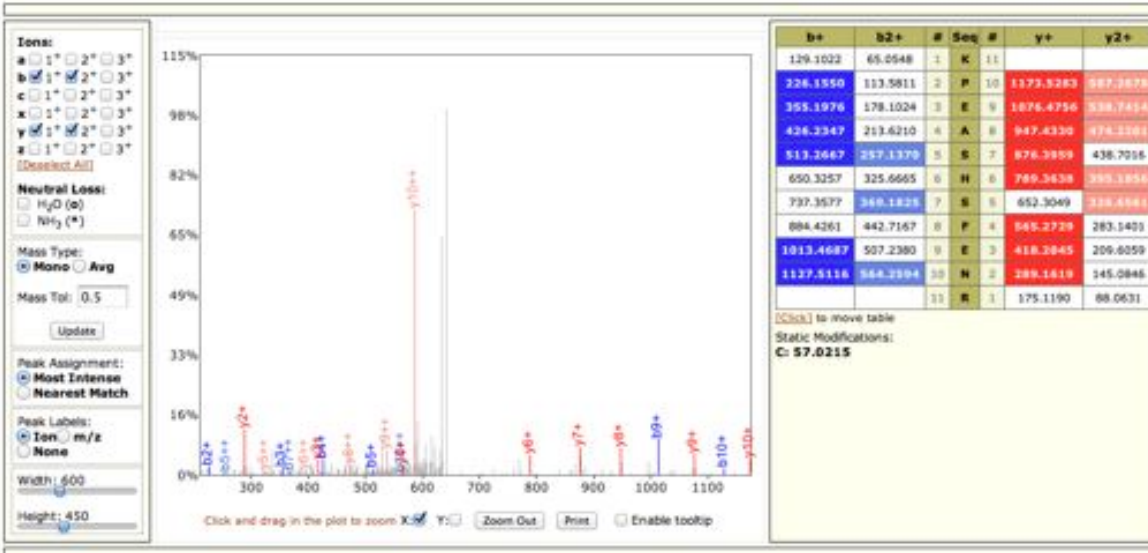

| Protein Probab. | Protein                                     | Tot. Peptides | Unique Peptides | Best Gene Name                   | Scan # | Charge | Delta Mass | Peptide Prophet Score | Peptide Sequence     |
|-----------------|---------------------------------------------|---------------|-----------------|----------------------------------|--------|--------|------------|-----------------------|----------------------|
| 0.9056          | IPI00787362,<br>IPI00887022,<br>IPI00398625 | 1             | 1               | LOC730839,<br>LOC730839,<br>HRNR | 1038   | 2+     | -0.0155    | 0.9951                | R.GPYESGSGHSSGLGHR.E |

Peptide Details FIND MS2 FEATURES

| SHOW MODIFICATIONS |           | Protein     |                                                                                      |
|--------------------|-----------|-------------|--------------------------------------------------------------------------------------|
| Scan               | 1038      | Protein     | IPI00398625                                                                          |
| Mass               | 1584.7150 | Fraction    | VF_T13h_band01.mzXML                                                                 |
| Hyper              | 318.000   | Run         | VF_T13h_band01.pep.xml (Vitor/VF_T13h_band01 (VF_SILAC_AssimtWindow_NewR_4da_Human)) |
| Protein Hits       | 7         | Ion Percent | 67%                                                                                  |
| Charge             | 2+        | B           | 0.000                                                                                |
| Delta Mass         | -0.0155   |             |                                                                                      |
| Next               | 196.000   |             |                                                                                      |
| Peptide Prophet    | 1.00      |             |                                                                                      |

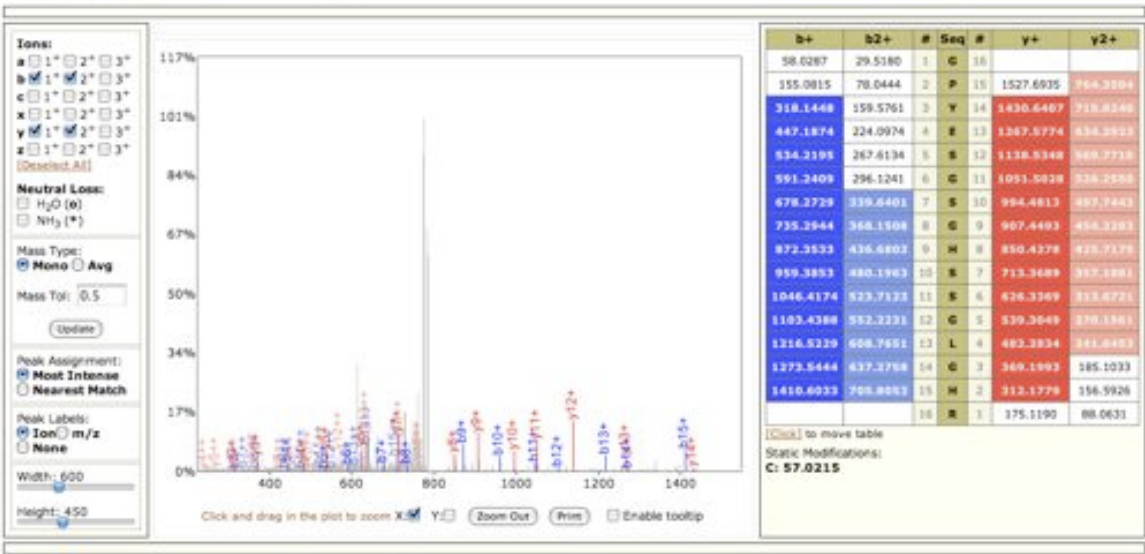



| Protein Probab. | Protein                     | Tot. Peptides | Unique Peptides | Best Gene Name  | Scan # | Charge | Delta Mass | Peptide Prophet Score | Peptide Sequence     |
|-----------------|-----------------------------|---------------|-----------------|-----------------|--------|--------|------------|-----------------------|----------------------|
| 0.9289          | IPI00470921,<br>IPI00033030 | 1             | 1               | ADRM1,<br>ADRM1 | 1041   | 2+     | -0.0173    | 0.9947                | R.SQSAAVTPSSTTSSTR.A |

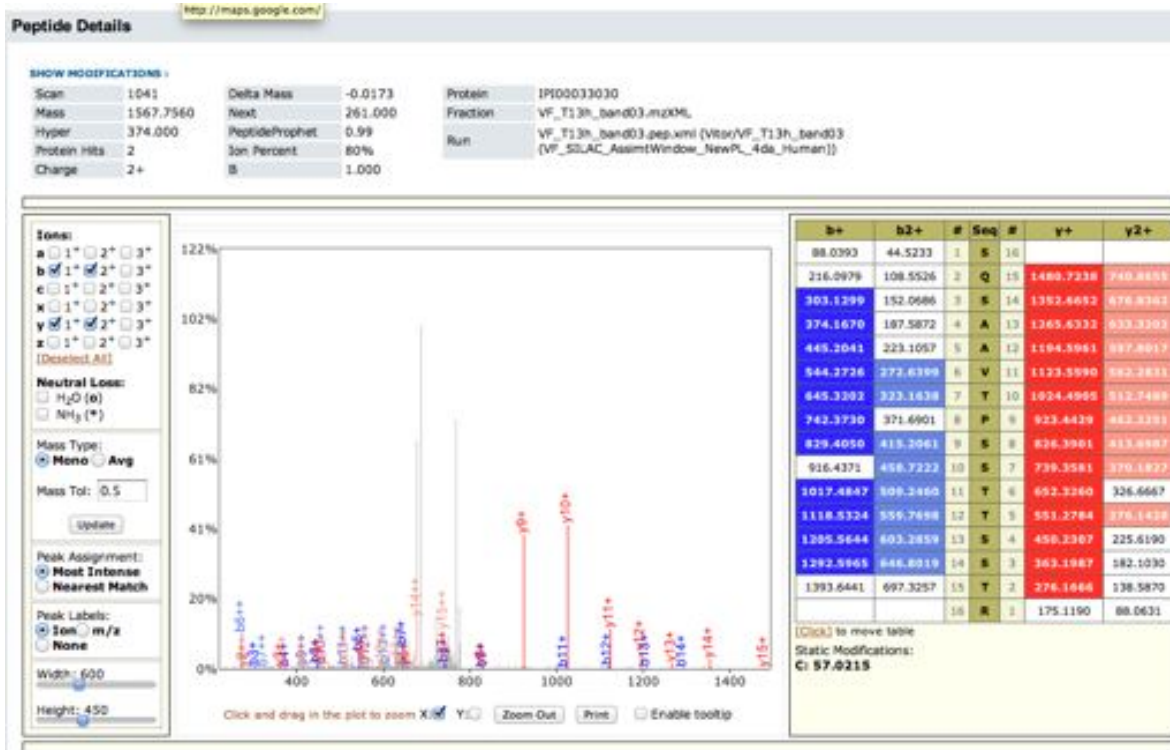

| Protein Probab. | Protein                                     | Tot. Peptides | Unique Peptides | Best Gene Name         | Scan # | Charge | Delta Mass | Peptide Prophet Score | Peptide Sequence |
|-----------------|---------------------------------------------|---------------|-----------------|------------------------|--------|--------|------------|-----------------------|------------------|
| 0.9838          | IPI00216508,<br>IPI00552276,<br>IPI00815770 | 1             | 1               | SNX3,<br>SNX3,<br>SNX3 | 1047   | 2+     | -0.0166    | 0.9995                | K.VAGHPLAQNER.C  |

### Peptide Details

#### SHOW MODIFICATIONS

|              |           |                |         |          |                                                                                         |
|--------------|-----------|----------------|---------|----------|-----------------------------------------------------------------------------------------|
| Scan         | 1047      | Delta Mass     | -0.0166 | Protein  | IPI00216508                                                                             |
| Mass         | 1191.6230 | Next           | 307.000 | Fraction | VF_T13h_band06.mzXML                                                                    |
| Hyper        | 507.000   | PeptideProphet | 1.00    | Run      | VF_T13h_band06.pep.xml (Vitor/VF_T13h_band06<br>(VF_SILAC_AssmtWindow_NewPL_4da_Human)) |
| Protein Hits | 3         | Ion Percent    | 95%     |          |                                                                                         |
| Charge       | 2+        | B              | 1.000   |          |                                                                                         |

#### Ions:

- 1\*  2\*  3\*  
 1\*  2\*  3\*  
 1\*  2\*  3\*  
 1\*  2\*  3\*  
 1\*  2\*  3\*  
 1\*  2\*  3\*

#### Neutral Loss:

- H<sub>2</sub>O (\*)  
 NH<sub>3</sub> (\*)

#### Mass Type:

- None  Avg

Mass Tol: 0.5

Update

#### Peak Assignment:

- Most Intense  Nearest Match

#### Peak Labels:

- Ion  m/z

Width: 500

Height: 450

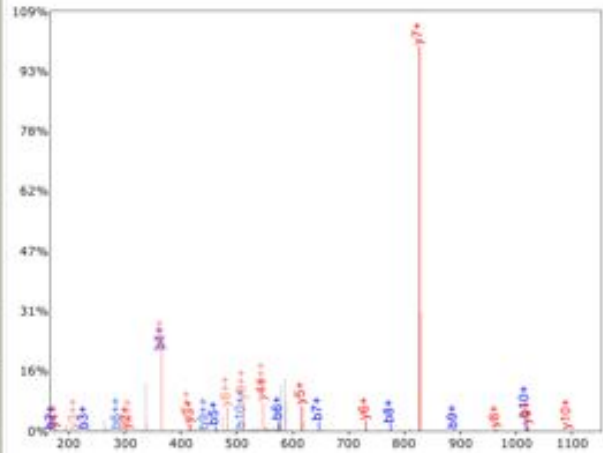

Click and drag in the plot to zoom X: Y: Zoom Out Print Enable tooltip

| b+        | b2+      | #  | Seq # | y+        | y2+      |
|-----------|----------|----|-------|-----------|----------|
| 100.0757  | 50.5415  | 1  | V 11  |           |          |
| 171.1128  | 86.0600  | 2  | A 10  | 1092.5545 | 546.7899 |
| 328.1343  | 114.5708 | 3  | G 9   | 1021.9174 | 533.3433 |
| 385.1932  | 183.0502 | 4  | H 8   | 964.4959  | 482.7518 |
| 483.2459  | 231.6266 | 5  | P 7   | 927.4370  | 434.3221 |
| 575.3304  | 288.1888 | 6  | L 6   | 730.3842  | 383.8958 |
| 646.3671  | 323.6872 | 7  | A 5   | 617.3002  | 309.1137 |
| 774.4257  | 387.7565 | 8  | Q 4   | 546.2630  | 273.6352 |
| 888.4686  | 444.7380 | 9  | N 3   | 418.3045  | 209.6019 |
| 1017.5112 | 509.2592 | 10 | E 2   | 304.1615  | 152.5844 |
|           |          | 11 | R 1   | 179.1190  | 88.0631  |

[Click] to move table

Static Modifications:

C: \$7.0215

| Protein Probab. | Protein                                                                                                                     | Tot. Peptides | Unique Peptides | Best Gene Name                                                                      | Scan# | Charge | Delta Mass | Peptide Prophet Score | Peptide Sequence |
|-----------------|-----------------------------------------------------------------------------------------------------------------------------|---------------|-----------------|-------------------------------------------------------------------------------------|-------|--------|------------|-----------------------|------------------|
| 0.9367          | IP100877709,<br>IP100896410,<br>IP100786911,<br>IP100746075,<br>IP100738898,<br>IP100176574,<br>IP100742027,<br>IP100220344 | 1             | 1               | -, -,<br>LOC649299,<br>-,<br>hCG_178751<br>9,<br>LOC284230,<br>LOC284230,<br>RPL36A | 1109  | 2+     | -0.0132    | 0.9956                | K.GK'DSLYAQGK'.W |

### Peptide Details

#### SHOW MODIFICATIONS

|              |           |                |         |          |                                                                                        |
|--------------|-----------|----------------|---------|----------|----------------------------------------------------------------------------------------|
| Scan         | 1109      | Delta Mass     | -0.0132 | Protein  | IP00176574                                                                             |
| Mass         | 1078.5930 | Next           | 259.000 | Fraction | VF_T13h_band05.mzXML                                                                   |
| Hyper        | 424.000   | PeptideProphet | 1.00    | Run      | VF_T13h_band05.pep.xml (Vitor/VF_T13h_band05<br>(VF_SILAC_AssmtWindow_NewR_4da_Human)) |
| Protein Hits | 8         | Ion Percent    | 89%     |          |                                                                                        |
| Charge       | 2+        | B              | 1.000   |          |                                                                                        |

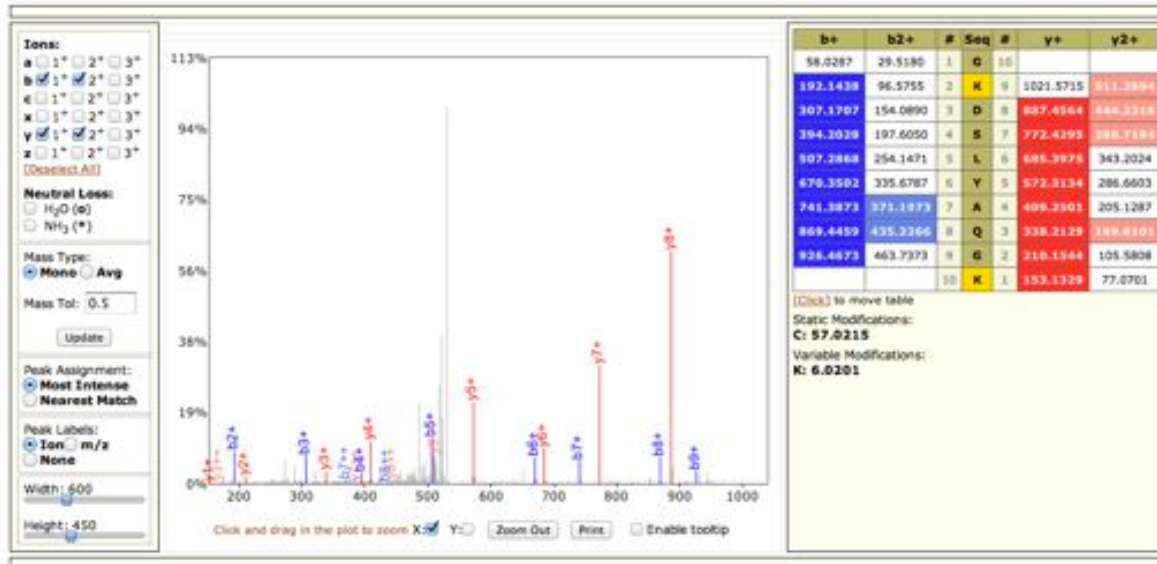

| Protein Probab. | Protein                                                     | Tot. Peptides | Unique Peptides | Best Gene Name               | Scan # | Charge | Delta Mass | Peptide Prophet Score | Peptide Sequence |
|-----------------|-------------------------------------------------------------|---------------|-----------------|------------------------------|--------|--------|------------|-----------------------|------------------|
| 0.9422          | IPI00793728,<br>IPI00909212,<br>IPI00848133,<br>IPI00022240 | 1             | 1               | ISCU,<br>-,<br>ISCU,<br>ISCU | 1121   | 2+     | -0.0139    | 0.9961                | K.VVDHYENPR.N    |

### Peptide Details

#### SHOW MODIFICATIONS

|              |           |                |         |          |                                                                                          |
|--------------|-----------|----------------|---------|----------|------------------------------------------------------------------------------------------|
| Scan         | 1121      | Delta Mass     | -0.0139 | Protein  | IPI00022240                                                                              |
| Mass         | 1128.5430 | Next           | 239.000 | Fraction | VF_T13h_band05.mzXML                                                                     |
| Hyper        | 353.000   | PeptideProphet | 1.00    | Run      | VF_T13h_band05.pep.xml [Vitor/VF_T13h_band05<br>(VF_SILAC_AssimtWindow_NewPL_4da_Human)] |
| Protein Hits | 4         | Ion Percent    | 88%     |          |                                                                                          |
| Charge       | 2+        | B              | 1.000   |          |                                                                                          |

#### Ions:

- 1\*  2\*  3\*  
 1\*  2\*  3\*  
 1\*  2\*  3\*  
 1\*  2\*  3\*  
 1\*  2\*  3\*  
 1\*  2\*  3\*  
[\[Deselect All\]](#)

#### Neutral Loss:

- H<sub>2</sub>O (a)  
 NH<sub>3</sub> (\*)

Mass Type:  Mono  Avg

Mass Tol: 0.5

[Update](#)

#### Peak Assignment:

- Most Intense  
 Nearest Match

#### Peak Labels:

- Ion\_m/z  
 None

Width: 600

Height: 450

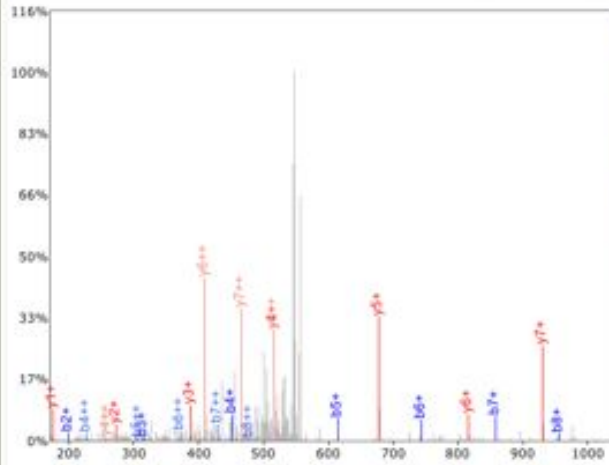

| b+       | b2+      | # | Seq # | y+ | y2+       |
|----------|----------|---|-------|----|-----------|
| 100.0757 | 50.5415  | 1 | V     | 8  |           |
| 199.1441 | 100.0757 | 2 | V     | 8  | 1029.4748 |
| 314.1710 | 157.5892 | 3 | D     | 7  | 930.4064  |
| 431.2300 | 226.1188 | 4 | H     | 6  | 819.3795  |
| 614.2933 | 307.6503 | 5 | Y     | 5  | 679.3206  |
| 743.3359 | 373.1716 | 6 | E     | 4  | 519.2572  |
| 857.3798 | 439.1930 | 7 | N     | 3  | 396.2146  |
| 934.4316 | 477.7194 | 8 | P     | 2  | 272.1717  |
|          |          | 9 | R     | 1  | 175.1190  |

[\[Click\]](#) to move table

Static Modifications:

C: 57.0215

| Protein Probab. | Protein                                                     | Tot. Peptides | Unique Peptides | Best Gene Name              | Scan # | Charge | Delta Mass | Peptide Prophet Score | Peptide Sequence |
|-----------------|-------------------------------------------------------------|---------------|-----------------|-----------------------------|--------|--------|------------|-----------------------|------------------|
| 0.9723          | IPI00793728,<br>IPI00909212,<br>IPI00848133,<br>IPI00022240 | 1             | 1               | ISCU,<br>,<br>ISCU,<br>ISCU | 1126   | 2+     | -0.0159    | 0.9984                | K.VVDHYENPR.N    |

Peptide Details

SHOW MODIFICATIONS

|              |           |                 |         |          |                                                                                         |
|--------------|-----------|-----------------|---------|----------|-----------------------------------------------------------------------------------------|
| Scan         | 1126      | Delta Mass      | -0.0159 | Protein  | IPI00022240                                                                             |
| Mass         | 1126.5430 | Next            | 259.000 | Fraction | VF_T13h_band06.mzXML                                                                    |
| Hyper        | 416.000   | Peptide/Prophet | 1.00    | Run      | VF_T13h_band06.pep.xml (V6or/VF_T13h_band06<br>[VF_SILAC_AssimtWindow_NewPL_4da_Human]) |
| Protein Hits | 4         | Ion Percent     | 88%     |          |                                                                                         |
| Charge       | 2+        | B               | 1.000   |          |                                                                                         |

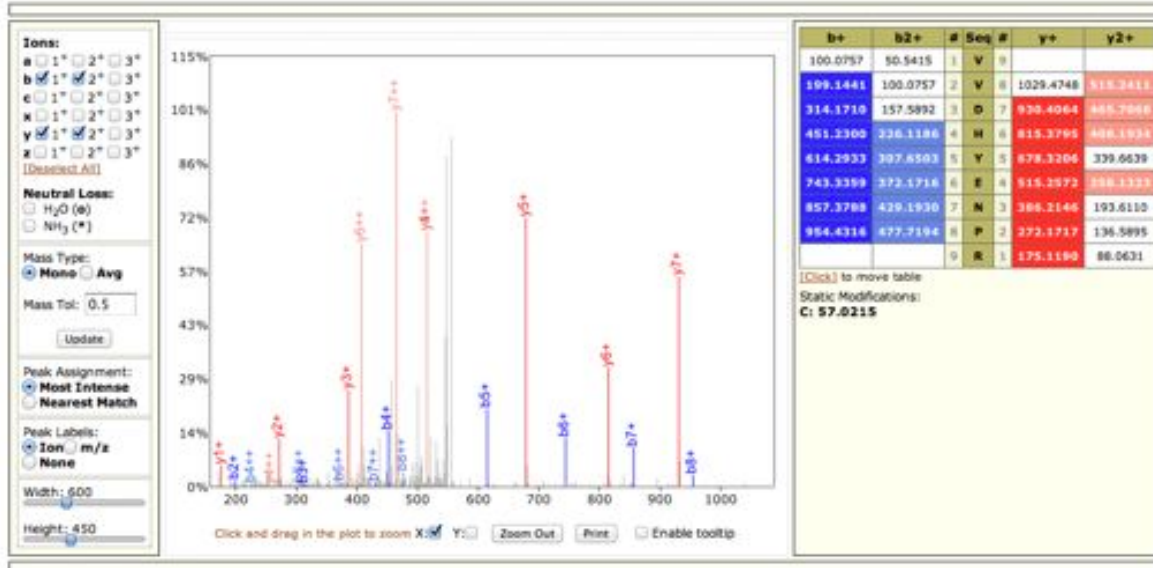

| Protein Probab. | Protein                                     | Tot. Peptides | Unique Peptides | Best Gene Name                  | Scan # | Charge | Delta Mass | Peptide Prophet Score | Peptide Sequence       |
|-----------------|---------------------------------------------|---------------|-----------------|---------------------------------|--------|--------|------------|-----------------------|------------------------|
| 0.8719          | IPI00639797,<br>IPI00336094,<br>IPI00017726 | 1             | 1               | HSD17B10,<br>HSD17B10,<br>HADH2 | 1171   | 2+     | -0.0174    | 0.9931                | R.LVAGEM"GQNEPDQGGQR.G |

### Peptide Details

#### SHOW MODIFICATIONS -

|              |           |                |         |          |                                                                                      |
|--------------|-----------|----------------|---------|----------|--------------------------------------------------------------------------------------|
| Scan         | 1171      | Delta Mass     | -0.0174 | Protein  | IPI00017726                                                                          |
| Mass         | 1801.8130 | Next           | 227.000 | Fraction | VF_T13h_band02.mzXML                                                                 |
| Hyper        | 340.000   | PeptideProphet | 0.99    | Run      | VF_T13h_band02.pep.xml (Vitor/VF_T13h_band02 (VF_SILAC_AssmtWindow_NewPL_4da_Human)) |
| Protein Hits | 3         | Ion Percent    | 56%     |          |                                                                                      |
| Charge       | 2+        | B              | 1.000   |          |                                                                                      |

#### Ions:

- 1\*  2\*  3\*  
 b 1\*  2\*  3\*  
 c 1\*  2\*  3\*  
 x 1\*  2\*  3\*  
 y 1\*  2\*  3\*  
 z 1\*  2\*  3\*  
[\[Deselect All\]](#)

#### Neutral Loss:

- H<sub>2</sub>O (w)  
 NH<sub>3</sub> (\*)

#### Mass Type:

- Mono  Avg

Mass Tol: 0.5

[Update](#)

#### Peak Assignment:

- Most Intense  Nearest Match

#### Peak Labels:

- Seq. m/z  None

Width: 600

Height: 450

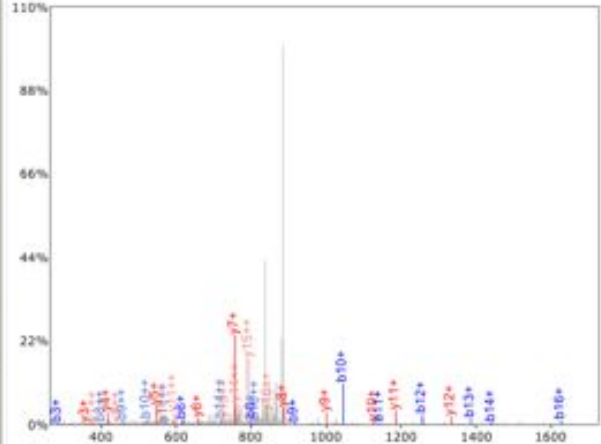

Click and drag in the plot to zoom X:  Y:  [Zoom Out](#) [Print](#)  Enable tooltip

| b+        | b2+      | #  | Seq # | y+        | y2+      |
|-----------|----------|----|-------|-----------|----------|
| 114.0913  | 57.5493  | 1  | L 17  |           |          |
| 213.1598  | 107.0835 | 2  | V 16  | 1688.7293 | 844.3643 |
| 384.1988  | 142.6021 | 3  | A 15  | 1589.6609 | 794.8301 |
| 341.2183  | 171.1128 | 4  | G 14  | 1518.6237 | 759.3118 |
| 470.2609  | 235.6341 | 5  | E 13  | 1461.6023 | 730.8018 |
| 617.3963  | 309.1518 | 6  | M 12  | 1332.5597 | 666.2835 |
| 674.3378  | 337.6625 | 7  | G 11  | 1189.5243 | 594.7628 |
| 802.3764  | 401.6918 | 8  | Q 10  | 1128.5028 | 564.2511 |
| 916.4193  | 458.7133 | 9  | N 9   | 1060.4443 | 530.2258 |
| 1045.4619 | 523.2346 | 10 | E 8   | 884.4013  | 442.2003 |
| 1142.5144 | 571.7410 | 11 | P 7   | 787.3587  | 393.6790 |
| 1257.5414 | 629.2744 | 12 | D 6   | 680.3060  | 340.1530 |
| 1385.6001 | 693.3037 | 13 | Q 5   | 545.3796  | 272.6893 |
| 1442.6216 | 721.8144 | 14 | G 4   | 417.2205  | 209.1139 |
| 1499.6431 | 750.3252 | 15 | G 3   | 360.1990  | 180.0991 |
| 1637.7017 | 814.3545 | 16 | Q 2   | 303.1775  | 151.5888 |
|           |          | 17 | R 1   | 175.1590  | 87.5795  |

[\[Click\]](#) to move table

Static Modifications:

C: 57.0215

Variable Modifications:

M: 15.9949

| Protein Probab. | Protein     | Tot. Peptides | Unique Peptides | Best Gene Name | Scan # | Charge | Delta Mass | Peptide Prophet Score | Peptide Sequence    |
|-----------------|-------------|---------------|-----------------|----------------|--------|--------|------------|-----------------------|---------------------|
| 0.9765          | IPI00012535 | 1             | 1               | DNAJA1         | 1177   | 2+     | +0.9795    | 0.9997                | R.HYNGEAYEDDEHHPR.G |

### Peptide Details

#### SHOW MODIFICATIONS -

|              |           |                |         |          |                                              |
|--------------|-----------|----------------|---------|----------|----------------------------------------------|
| Scan         | 1177      | Delta Mass     | +0.9795 | Protein  | IPI00012535                                  |
| Mass         | 1866.7580 | Next           | 348.000 | Fraction | VF_T13h_band02.mzXML                         |
| Hyper        | 667.000   | PeptideProphet | 1.00    | Run      | VF_T13h_band02.pep.xml (Vitor/VF_T13h_band02 |
| Protein Hits | 1         | Ion Percent    | 93%     |          | (VF_SILAC_AssimtWindow_NewPL_4da_Human)      |
| Charge       | 2+        | B              | 1.000   |          |                                              |

**Ions:**

a  1<sup>+</sup>  2<sup>+</sup>  3<sup>+</sup>

b  1<sup>+</sup>  2<sup>+</sup>  3<sup>+</sup>

c  1<sup>+</sup>  2<sup>+</sup>  3<sup>+</sup>

x  1<sup>+</sup>  2<sup>+</sup>  3<sup>+</sup>

y  1<sup>+</sup>  2<sup>+</sup>  3<sup>+</sup>

z  1<sup>+</sup>  2<sup>+</sup>  3<sup>+</sup>

[\(DelectAll\)](#)

**Neutral Loss:**

H<sub>2</sub>O (a)

NH<sub>3</sub> (\*)

**Mass Type:**

Mono  Avg

Mass Tol: 0.5

**Peak Assignment:**

Most Intense

Nearest Match

**Peak Labels:**

Ion  m/z

None

Width: 500

Height: 450

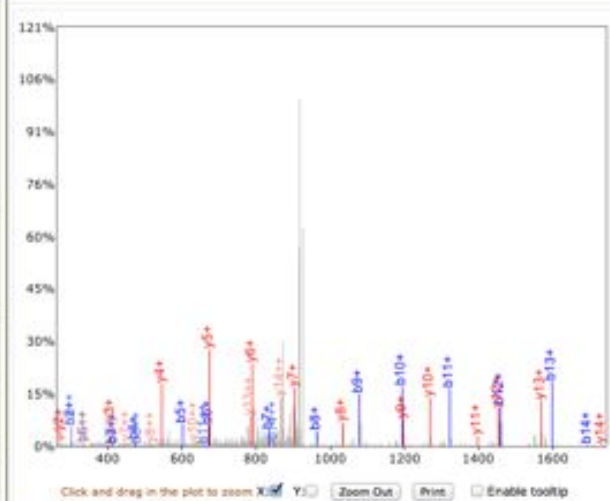

| b+        | b2+      | #  | Seq # | y+        | y2+      |
|-----------|----------|----|-------|-----------|----------|
| 138.0662  | 69.5367  | 1  | H 15  |           |          |
| 301.1299  | 151.0684 | 2  | Y 14  | 1731.6994 | 868.3532 |
| 415.1724  | 208.0899 | 3  | N 13  | 1568.6360 | 794.8217 |
| 472.1938  | 236.6006 | 4  | G 12  | 1454.6921 | 727.8002 |
| 661.2365  | 301.1219 | 5  | E 11  | 1397.6716 | 699.2895 |
| 672.2736  | 336.4404 | 6  | A 10  | 1268.5261 | 654.7682 |
| 839.3369  | 418.1721 | 7  | Y 9   | 1197.4919 | 599.2496 |
| 964.3795  | 482.4934 | 8  | E 8   | 1034.4286 | 517.7179 |
| 1079.4065 | 540.2068 | 9  | D 7   | 905.3860  | 453.1966 |
| 1194.4324 | 597.7203 | 10 | D 6   | 790.3591  | 395.6832 |
| 1323.4760 | 662.2416 | 11 | E 5   | 675.3321  | 338.1697 |
| 1460.5349 | 730.7731 | 12 | H 4   | 546.2895  | 273.6666 |
| 1597.5938 | 799.3006 | 13 | H 3   | 409.2306  | 205.1190 |
| 1694.6464 | 847.8289 | 14 | P 2   | 272.1717  | 136.5895 |
|           |          | 15 | R 1   | 175.1190  | 88.0631  |

[\[Click\] to move table](#)  
Static Modifications:  
C: 57.0215

Click and drag in the plot to zoom X: Y:    Enable tooltip

| Protein Probab. | Protein                                                                                     | Tot. Peptides | Unique Peptides | Best Gene Name                                                   | Scan # | Charge | Delta Mass | Peptide Prophet Score | Peptide Sequence     |
|-----------------|---------------------------------------------------------------------------------------------|---------------|-----------------|------------------------------------------------------------------|--------|--------|------------|-----------------------|----------------------|
| 0.9693          | IPI00910417,<br>IPI00909437,<br>IPI00790569,<br>IPI00062151,<br>IPI00470528,<br>IPI00550032 | 1             | 1               | RPL15, -,<br>RPL15,<br>LOC1363<br>21,<br>RPL15,<br>LOC6532<br>32 | 1219   | 2+     | -0.0127    | 0.9992                | K.GATYGKPVHHGVNQLK.F |

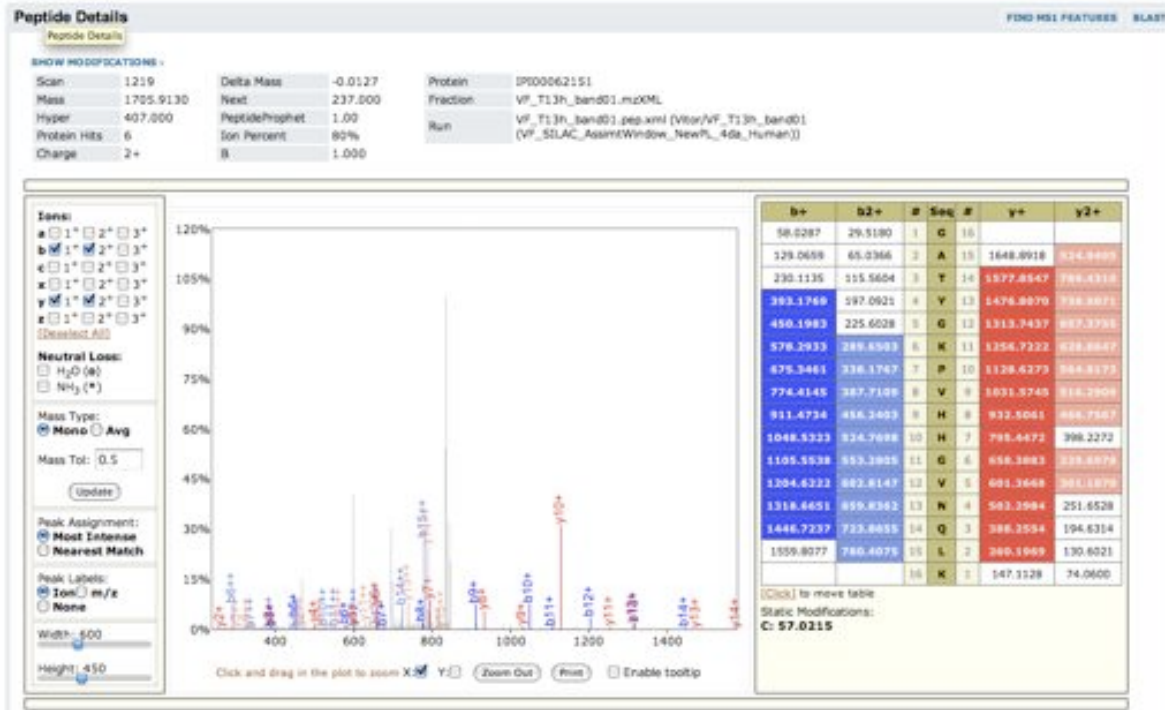



| Protein Probab. | Protein                                                     | Tot. Peptides | Unique Peptides | Best Gene Name                  | Scan # | Charge | Delta Mass | Peptide Prophet Score | Peptide Sequence      |
|-----------------|-------------------------------------------------------------|---------------|-----------------|---------------------------------|--------|--------|------------|-----------------------|-----------------------|
| 0.9852          | IP100640416,<br>IP100170692,<br>IP100871804,<br>IP100374657 | 1             | 1               | VAPA,<br>VAPA,<br>VAPA,<br>VAPA | 1221   | 2+     | -0.0166    | 0.9998                | K.VAHSKD'PGSTSTASFR.D |

### Peptide Details

#### SHOW MODIFICATIONS -

|                 |                      |                                                   |
|-----------------|----------------------|---------------------------------------------------|
| Scan: 1221      | Delta Mass: -0.0166  | Protein: IP00170692                               |
| Mass: 1653.8290 | Next: 217.000        | Fraction: VF_T13h_band05.mzXML                    |
| Hyper: 419.000  | PeptideProphet: 1.00 | Run: VF_T13h_band05.pep.xml (Vitor/VF_T13h_band05 |
| Protein Hits: 4 | Ion Percent: 83%     | (VF_SILAC_AssintWindow_NewPL_4da_Human))          |
| Charge: 2+      | B: 1.000             |                                                   |

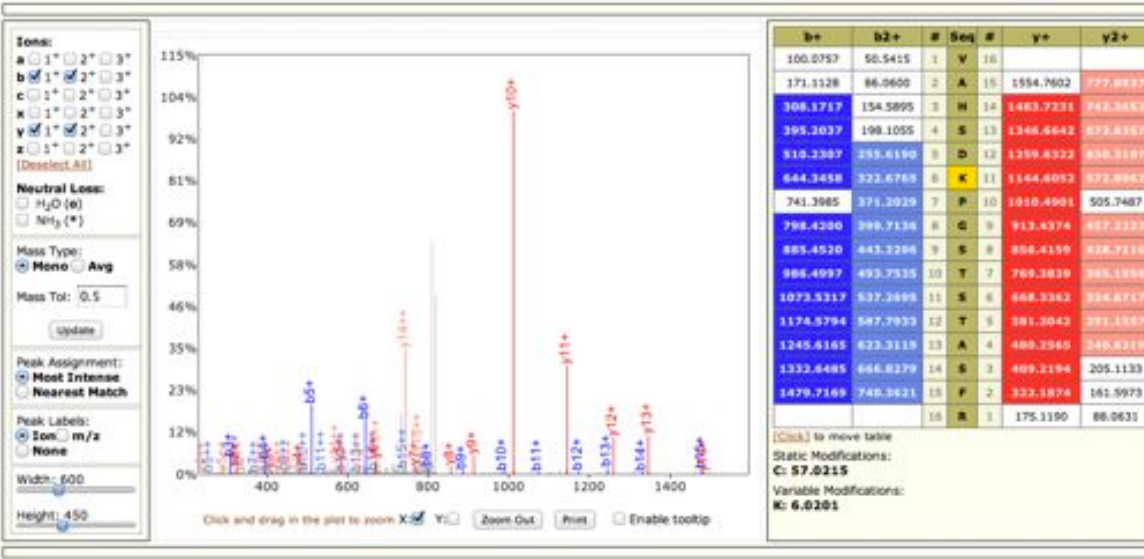

| Protein Probab. | Protein                     | Tot. Peptides | Unique Peptides | Best Gene Name | Scan # | Charge | Delta Mass | Peptide Prophet Score | Peptide Sequence        |
|-----------------|-----------------------------|---------------|-----------------|----------------|--------|--------|------------|-----------------------|-------------------------|
| 0.8429          | IPI00910350,<br>IPI00017596 | 1             | 1               | MAPRE1         | 1325   | 2+     | -0.0163    | 0.9858                | K.K'PLTSSSAAPQRPISTQR.T |

### Peptide Details

#### SHOW MODIFICATIONS

|              |           |                |         |          |                                                                                       |
|--------------|-----------|----------------|---------|----------|---------------------------------------------------------------------------------------|
| Scan         | 1325      | Delta Mass     | -0.0163 | Protein  | IPI00017596                                                                           |
| Mass         | 1931.0760 | Next           | 251.000 | Fraction | VF_T13h_band03.mpXML                                                                  |
| Hyper        | 346.000   | PeptideProphet | 0.99    | Run      | VF_T13h_band03.pep.xml (Vitor/VF_T13h_band03 (VF_SSAC_Assist(Window_NewPL_4Gb_Human)) |
| Protein Hits | 2         | Ion Percent    | 92%     |          |                                                                                       |
| Charge       | 2+        | B              | 1.000   |          |                                                                                       |

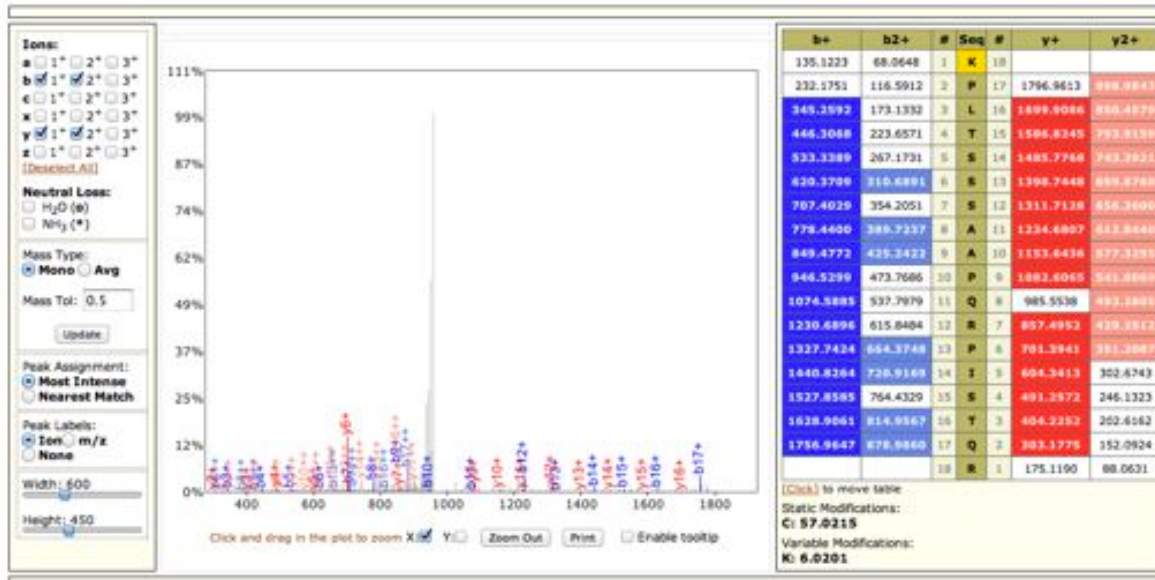



| Protein Probab. | Protein                                                     | Tot. Peptides | Unique Peptides | Best Gene Name                      | Scan # | Charge | Delta Mass | Peptide Prophet Score | Peptide Sequence |
|-----------------|-------------------------------------------------------------|---------------|-----------------|-------------------------------------|--------|--------|------------|-----------------------|------------------|
| 0.9723          | IPI00792420,<br>IPI00789514,<br>IPI00027270,<br>IPI00433834 | 1             | 1               | RPL26,<br>RPL26,<br>RPL26,<br>RPL26 | 1359   | 2+     | -0.0134    | 0.9984                | R.HFNAPSHIR.R    |

### Peptide Details

#### SHOW MODIFICATIONS -

|              |           |                |         |          |                                              |
|--------------|-----------|----------------|---------|----------|----------------------------------------------|
| Scan         | 1359      | Delta Mass     | -0.0134 | Protein  | IPI00027270                                  |
| Mass         | 1070.5540 | Next           | 303.000 | Fraction | VF_T13h_band06.mzXML                         |
| Hyper        | 456.000   | PeptideProphet | 1.00    | Run      | VF_T13h_band06.pep.xml (Vitor/VF_T13h_band06 |
| Protein Hits | 4         | Ion Percent    | 88%     |          | (VF_SQLAC_AssimWindow_NewPL_4da_Human))      |
| Charge       | 2+        | B              | 1.000   |          |                                              |

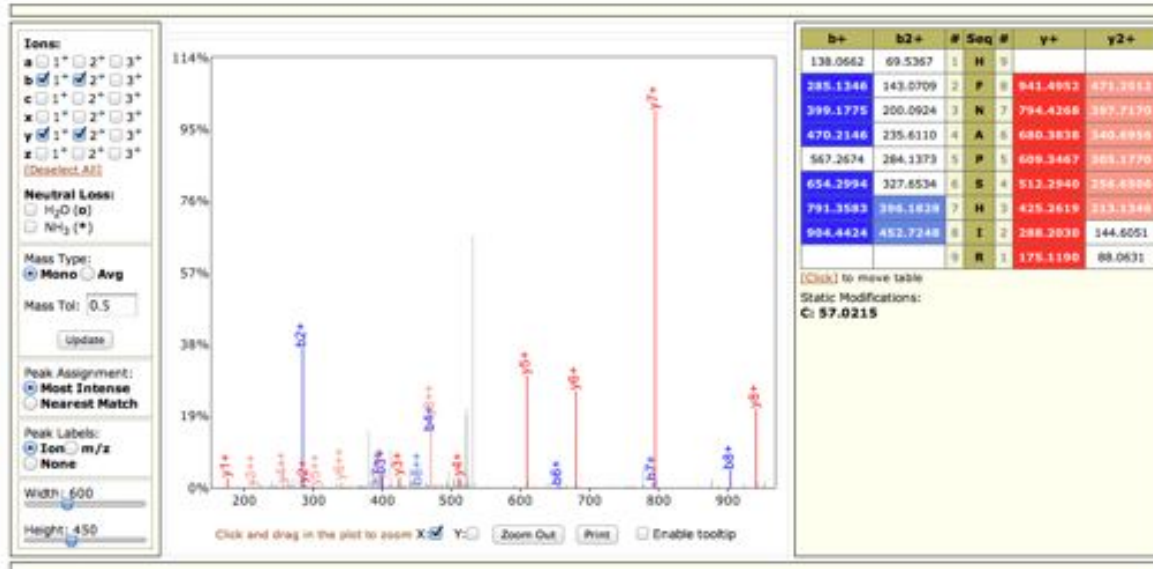

| Protein Probab. | Protein     | Tot. Peptides | Unique Peptides | Best Gene Name | Scan # | Charge | Delta Mass | Peptide Prophet Score | Peptide Sequence |
|-----------------|-------------|---------------|-----------------|----------------|--------|--------|------------|-----------------------|------------------|
| 0.9265          | IP100001546 | 1             | 1               | TIMM8B         | 1455   | 2+     | -0.0164    | 0.9938                | R.TENCLSSCVDR.F  |

### Peptide Details

#### SHOW MODIFICATIONS

|              |           |                 |         |          |                                                                                      |
|--------------|-----------|-----------------|---------|----------|--------------------------------------------------------------------------------------|
| Scan         | 1455      | Delta Mass      | -0.0164 | Protein  | IP100001546                                                                          |
| Mass         | 1340.5570 | Next            | 260.000 | Fraction | VF_T13h_band06.mzXML                                                                 |
| Hyper        | 376.000   | Peptide/Prophet | 0.99    | Run      | VF_T13h_band06.pep.xml (Vitor/VF_T13h_band06 (VF_SILAC_AssimWindow_NewPI_4da_Human)) |
| Protein Hits | 1         | Ion Percent     | 85%     |          |                                                                                      |
| Charge       | 2+        | B               | 1.000   |          |                                                                                      |

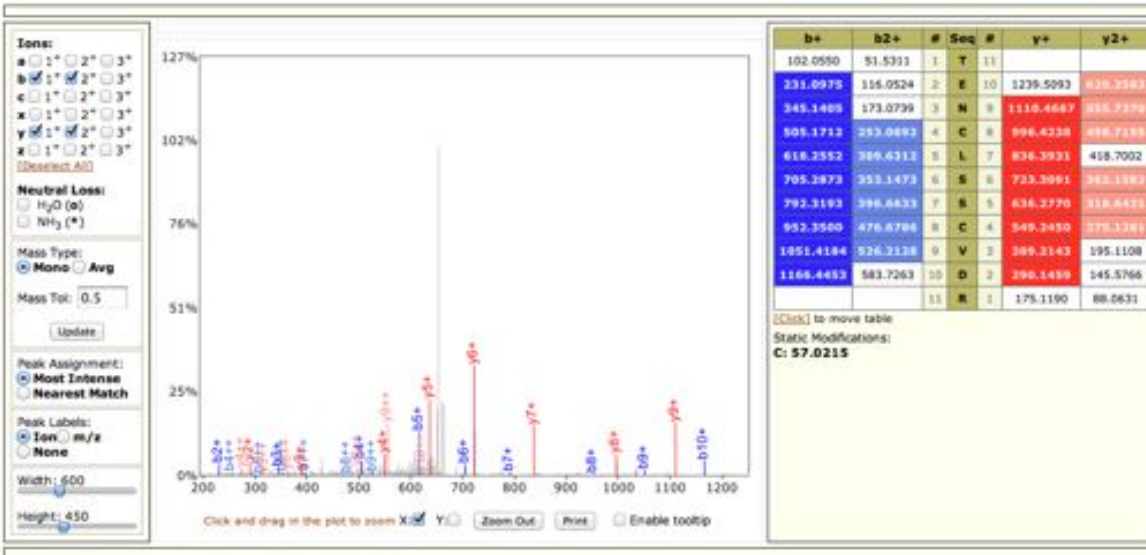

| Protein Probab. | Protein                     | Tot. Peptides | Unique Peptides | Best Gene Name        | Scan # | Charge | Delta Mass | Peptide Prophet Score | Peptide Sequence    |
|-----------------|-----------------------------|---------------|-----------------|-----------------------|--------|--------|------------|-----------------------|---------------------|
| 0.9759          | IPI00479514,<br>IPI00470535 | 1             | 1               | CACNA2D1,<br>CACNA2D1 | 1482   | 2+     | -0.0191    | 0.9996                | R.KTPNNPSCNADLINR.V |

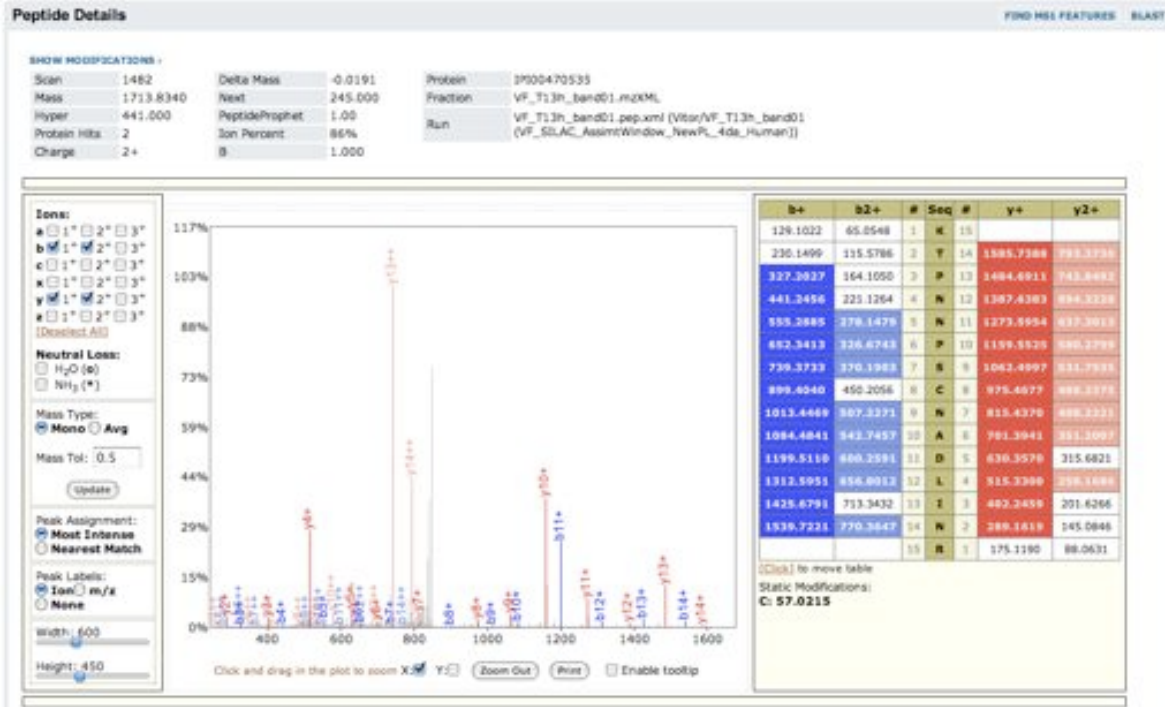

| Protein Probab. | Protein                     | Tot. Peptides | Unique Peptides | Best Gene Name  | Scan # | Charge | Delta Mass | Peptide Prophet Score | Peptide Sequence  |
|-----------------|-----------------------------|---------------|-----------------|-----------------|--------|--------|------------|-----------------------|-------------------|
| 0.9817          | IPI00790432,<br>IPI00293434 | 1             | 1               | SRP14,<br>SRP14 | 1510   | 2+     | -0.0136    | 0.9993                | K.KGTVEGFEPADNK.C |

### Peptide Details

| Peptide Details |           | Protein        |                                                                                     |
|-----------------|-----------|----------------|-------------------------------------------------------------------------------------|
| Scan            | 1510      | Protein        | IPI00293434                                                                         |
| Mass            | 1391.6800 | Fraction       | VF_T13h_band06.mzXML                                                                |
| Hyper           | 504.000   | PeptideProphet | 1.00                                                                                |
| Protein Hits    | 2         | Run            | VF_T13h_band06.pep.xml (Vitor/VF_T13h_band06 (VF_SILAC_AssimWindow_New%_4da_Human)) |
| Charge          | 2+        | Ion Percent    | 88%                                                                                 |
|                 |           | B              | 1.000                                                                               |

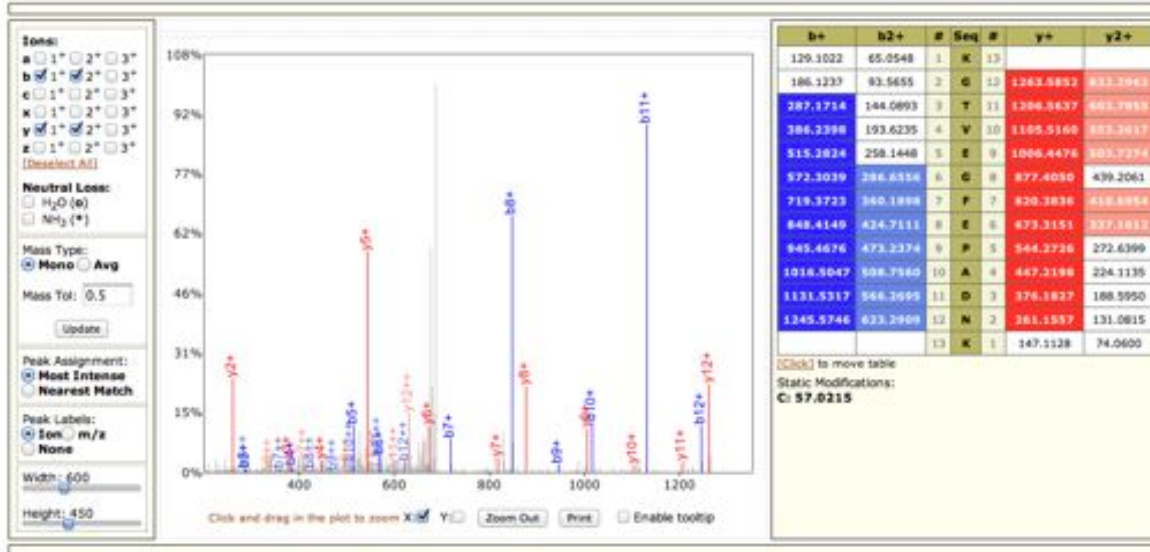

| Protein Probab. | Protein                     | Tot. Peptides | Unique Peptides | Best Gene Name      | Scan # | Charge | Delta Mass | Peptide Prophet Score | Peptide Sequence  |
|-----------------|-----------------------------|---------------|-----------------|---------------------|--------|--------|------------|-----------------------|-------------------|
| 0.8038          | IPI00793189,<br>IPI00015602 | 1             | 1               | TOMM70A,<br>TOMM70A | 1517   | 2+     | -0.0122    | 0.9873                | R.LRPESALAAQAK'.C |

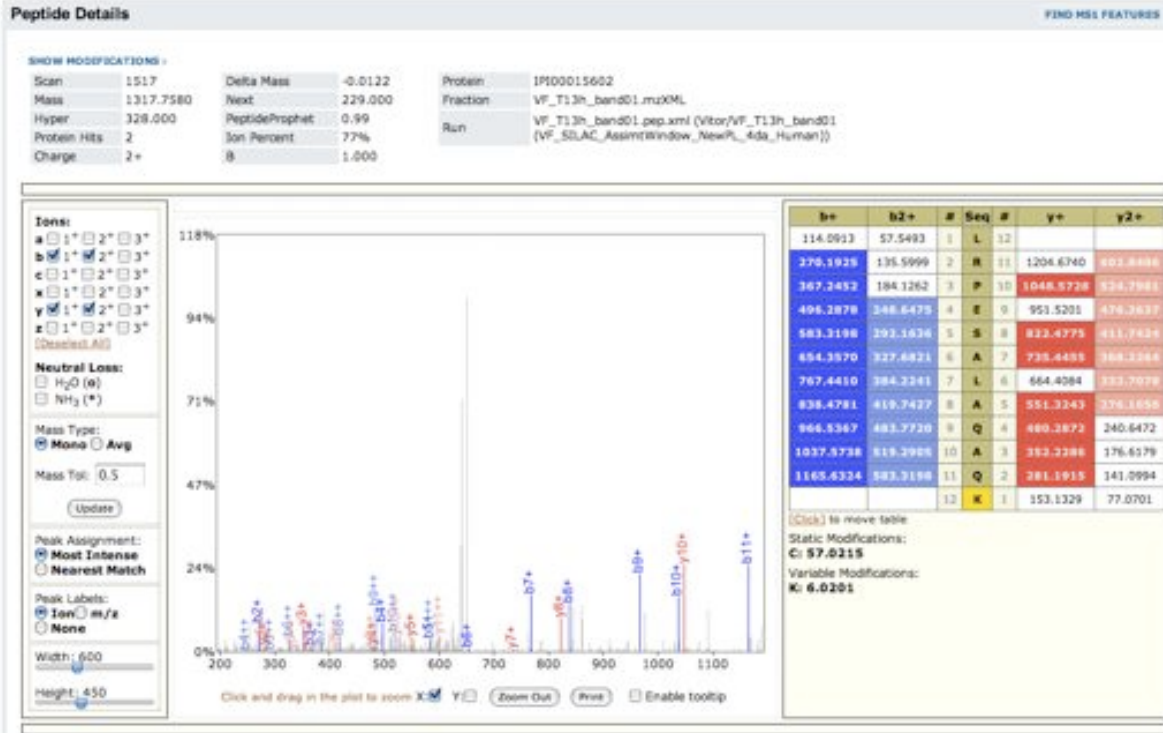



| Protein Probab. | Protein     | Tot. Peptides | Unique Peptides | Best Gene Name | Scan # | Charge | Delta Mass | Peptide Prophet Score | Peptide Sequence  |
|-----------------|-------------|---------------|-----------------|----------------|--------|--------|------------|-----------------------|-------------------|
| 0.9849          | IP100030362 | 1             | 1               | PLP2           | 1520   | 2+     | -0.0176    | 0.9996                | R.HTAAPTDPADGPV.- |

Peptide Details

SHOW MODIFICATIONS -

|                 |                      |                                                   |
|-----------------|----------------------|---------------------------------------------------|
| Scan: 1520      | Delta Mass: -0.0176  | Protein: IP100030362                              |
| Mass: 1248.5660 | Next: 274.000        | Fraction: VF_T13h_band06.mzXML                    |
| Hyder: 490.000  | PeptideProphet: 1.00 | Run: VF_T13h_band06 pep.xml (Vitor/VF_T13h_band06 |
| Protein Hits: 1 | Ion Percent: 88%     | (VF_52LAC_AsimtWindow_NewPL_4da_Human)            |
| Charge: 2+      | B: 1.000             |                                                   |

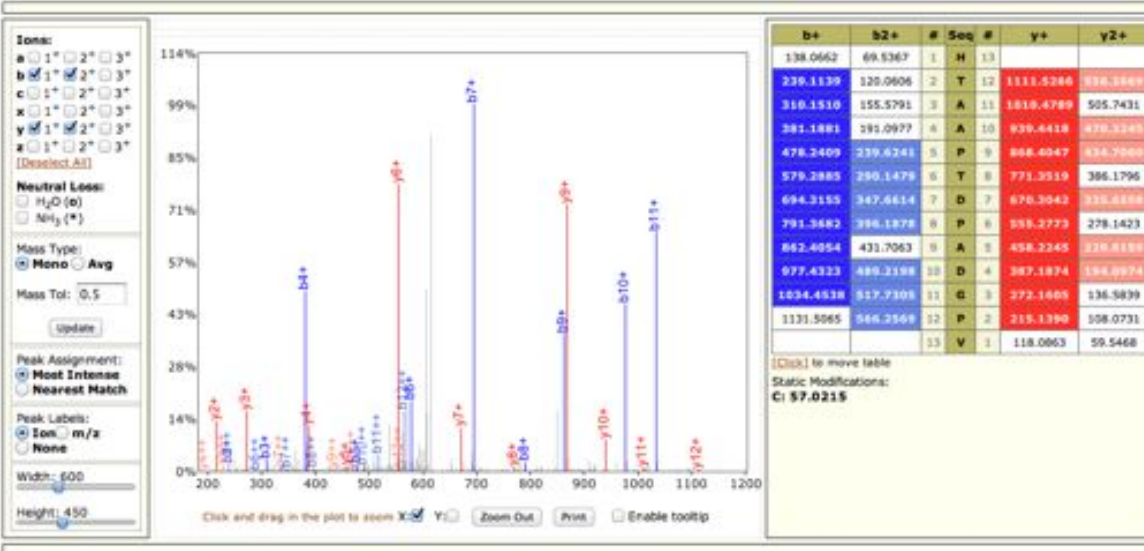

| Protein Probab. | Protein                                                                                                                                     | Tot. Peptides | Unique Peptides | Best Gene Name                                                            | Scan # | Charge | Delta Mass | Peptide Prophet Score | Peptide Sequence |
|-----------------|---------------------------------------------------------------------------------------------------------------------------------------------|---------------|-----------------|---------------------------------------------------------------------------|--------|--------|------------|-----------------------|------------------|
| 0.9822          | IPI00788938,<br>IPI00795075,<br>IPI00910754,<br>IPI00908791,<br>IPI00148061,<br>IPI00217966,<br>IPI00554498,<br>IPI00607708,<br>IPI00219217 | 1             | 1               | LDHB,<br>LDHA,<br>LDHA, -,<br>LDHAL6A,<br>LDHA,<br>LDHC,<br>LDHA,<br>LDHB | 1527   | 2+     | -0.0157    | 0.9998                | R.VIGSGCNLDSAR.F |

### Peptide Details

#### Peptide Details

SHOW MODIFICATIONS -

|              |           |                 |         |          |                                                                                       |
|--------------|-----------|-----------------|---------|----------|---------------------------------------------------------------------------------------|
| Scan         | 1527      | Delta Mass      | -0.0157 | Protein  | IPI00148061                                                                           |
| Mass         | 1248.6000 | Next            | 272.600 | Fraction | VF_T13h_band04.mzXML                                                                  |
| Hyper        | 491.000   | Peptide/Prophet | 1.00    | Run      | VF_T13h_band04 pep.xml (Vitor/VF_T13h_band04 (VF_SILAC_Assay(Window_NewPL_4ds_Human)) |
| Protein Hits | 9         | Ion Percent     | 86%     |          |                                                                                       |
| Charge       | 2+        | B               | 1.000   |          |                                                                                       |

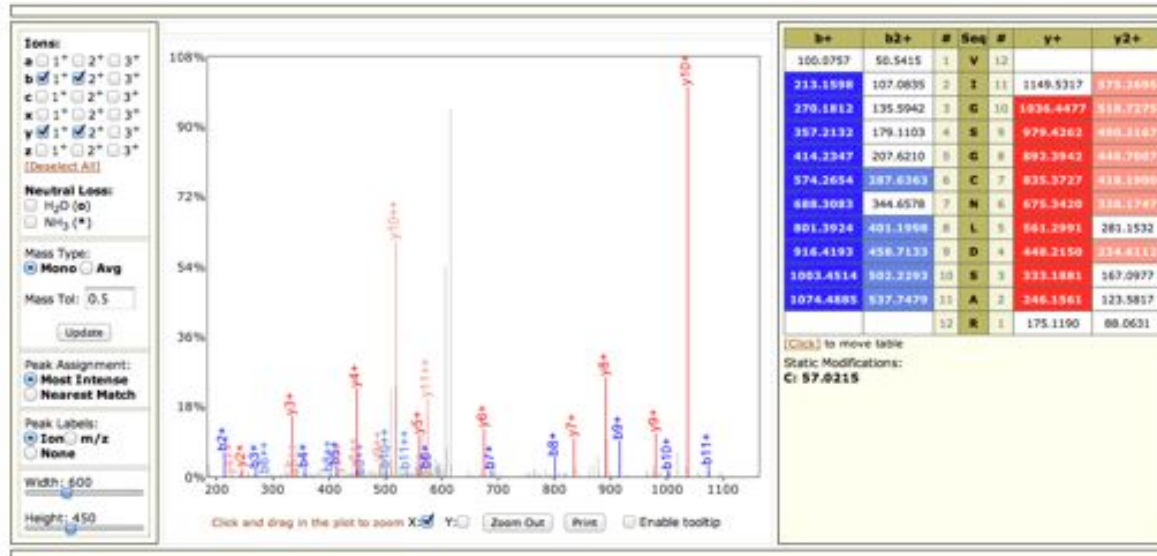

| Protein Probab. | Protein     | Tot. Peptides | Unique Peptides | Best Gene Name | Scan # | Charge | Delta Mass | Peptide Prophet Score | Peptide Sequence   |
|-----------------|-------------|---------------|-----------------|----------------|--------|--------|------------|-----------------------|--------------------|
| 0.9524          | IP100418290 | 1             | 1               | MRPL14         | 1550   | 2+     | -0.0158    | 0.9970                | R.VVDNSALGNSPYHR.A |

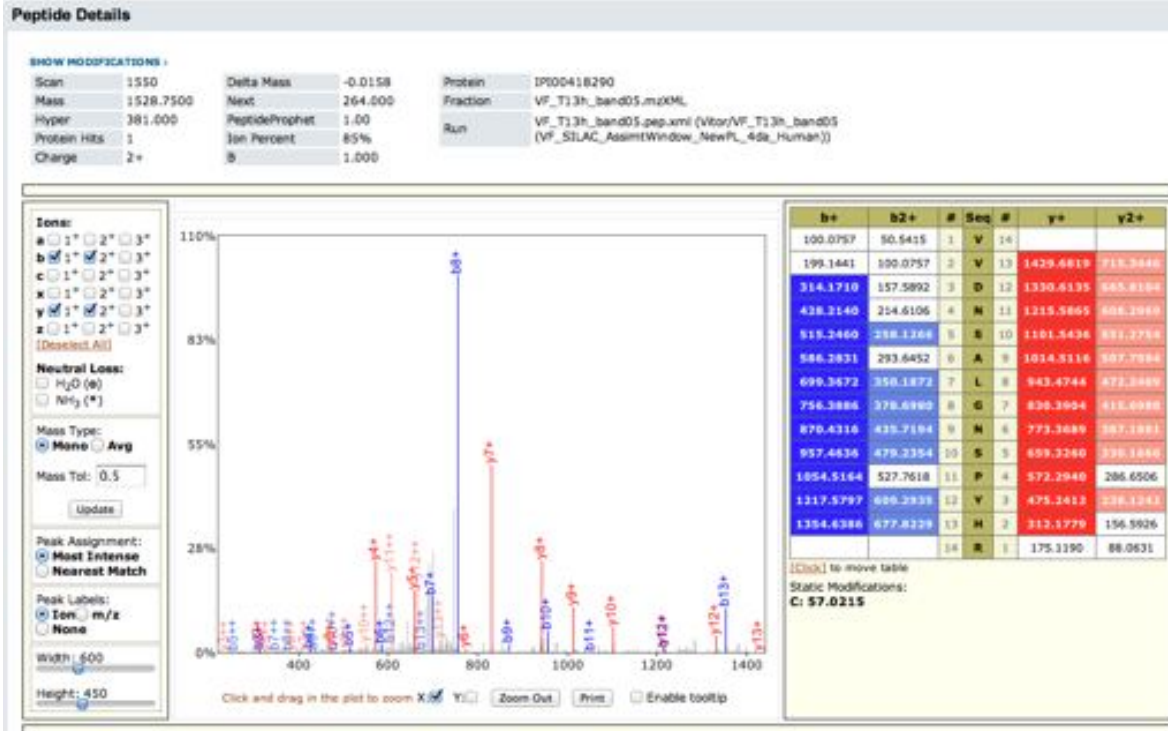





| Protein Probab. | Protein     | Tot. Peptides | Unique Peptides | Best Gene Name | Scan # | Charge | Delta Mass | Peptide Prophet Score | Peptide Sequence |
|-----------------|-------------|---------------|-----------------|----------------|--------|--------|------------|-----------------------|------------------|
| 0.9870          | IPI00216569 | 1             | 1               | CST7           | 1603   | 2+     | -0.0134    | 0.9998                | K.TNDPGVLQAAR.Y  |

### Peptide Details

#### SHOW MODIFICATIONS

|              |           |                 |         |          |                                                                                     |
|--------------|-----------|-----------------|---------|----------|-------------------------------------------------------------------------------------|
| Scan         | 1603      | Delta Mass      | -0.0134 | Protein  | IPI00216569                                                                         |
| Mass         | 1141.5960 | Next            | 362.000 | Fraction | VF_T13h_band06.mzXML                                                                |
| Hyper        | 629.000   | Peptide/Prophet | 1.00    | Run      | VF_T13h_band06.pep.xml (Vitor/VF_T13h_band06_VF_SILAC_Assmt/Window_NewPI_4da_Human) |
| Protein Hits | 1         | Ion Percent     | 95%     |          |                                                                                     |
| Charge       | 2+        | B               | 1.000   |          |                                                                                     |

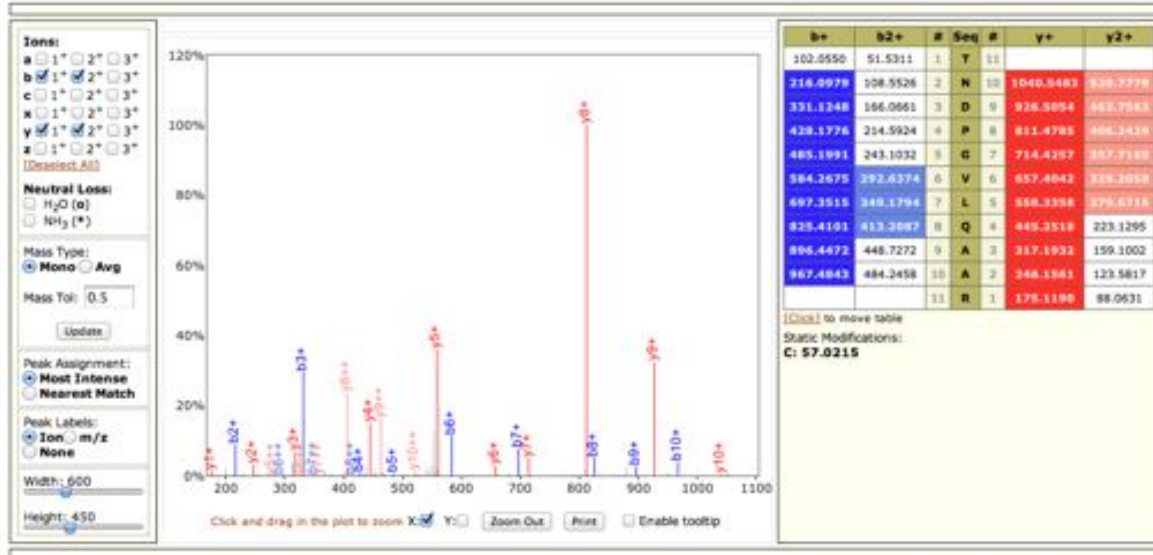

| Protein Probab. | Protein     | Tot. Peptides | Unique Peptides | Best Gene Name | Scan # | Charge | Delta Mass | Peptide Prophet Score | Peptide Sequence |
|-----------------|-------------|---------------|-----------------|----------------|--------|--------|------------|-----------------------|------------------|
| 0,8345          | IPI00001543 | 1             | 1               | TIMM10         | 1613   | 2+     | -0,0104    | 0,9832                | K.YLDIHER.M      |

### Peptide Details

#### SHOW MODIFICATIONS -

|              |          |                |         |          |                                                                                     |
|--------------|----------|----------------|---------|----------|-------------------------------------------------------------------------------------|
| Scan         | 1613     | Delta Mass     | -0.0104 | Protein  | IPI00001543                                                                         |
| Mass         | 945.4700 | Next           | 332.000 | Fraction | VF_T13h_band06.mzXML                                                                |
| Hyper        | 412.000  | PeptideProphet | 0.98    | Run      | VF_T13h_band06.pep.xml (Vtop/VF_T13h_band06 [VF_SILAC_AssmtWindow_NewPL_4da_Human]) |
| Protein Hits | 1        | Ion Percent    | 100%    |          |                                                                                     |
| Charge       | 2+       |                | 1.000   |          |                                                                                     |

#### Ions:

- 1<sup>+</sup>  2<sup>+</sup>  3<sup>+</sup>  
 1<sup>+</sup>  2<sup>+</sup>  3<sup>+</sup>

[Deselect All]

#### Neutral Loss:

- H<sub>2</sub>O (0)  
 NH<sub>3</sub> (\*)

#### Mass Type:

- Mono  Avg

Mass Tol: 0.5

Update

#### Peak Assignment:

- Most Intense  Nearest Match

#### Peak Labels:

- Ion\_m/z  None

Width: 500

Height: 450

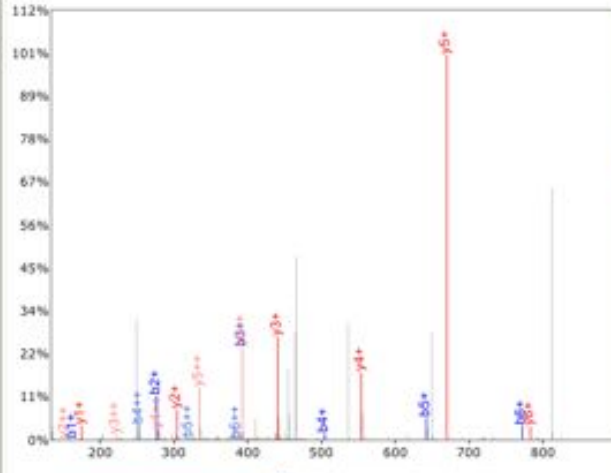

| b+       | b2+      | # | Seq # | y+ | y2+               |
|----------|----------|---|-------|----|-------------------|
| 164.0706 | 82.5389  | 1 | V     | 7  |                   |
| 277.1547 | 139.0810 | 2 | L     | 6  | 782.4155 361.7114 |
| 392.1818 | 196.5944 | 3 | D     | 5  | 669.3315 335.1894 |
| 505.2657 | 253.1365 | 4 | I     | 4  | 554.3045 277.8538 |
| 642.3246 | 321.6689 | 5 | H     | 3  | 441.2205 331.1338 |
| 771.3472 | 386.1872 | 6 | E     | 2  | 304.1615 183.3844 |
|          |          | 7 | R     | 1  | 175.1190 88.0631  |

[Click] to move table

Static Modifications:

C: 57.0215

| Protein Probab. | Protein                                     | Tot. Peptides | Unique Peptides | Best Gene Name         | Scan # | Charge | Delta Mass | Peptide Prophet Score | Peptide Sequence |
|-----------------|---------------------------------------------|---------------|-----------------|------------------------|--------|--------|------------|-----------------------|------------------|
| 0,9230          | IP100645966,<br>IP100645010,<br>IP100304596 | 1             | 1               | NONO,<br>NONO,<br>NONO | 1676   | 2+     | -0,0130    | 0,9965                | R.FACHSASLTVR.N  |

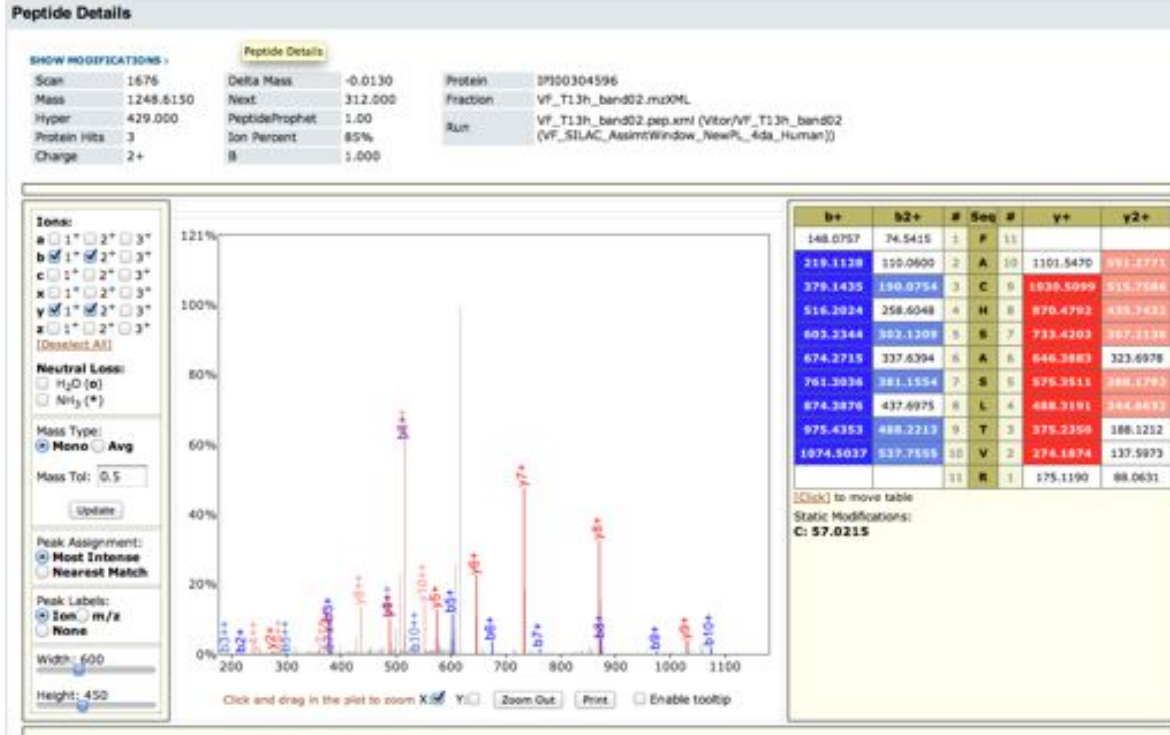



| Protein Probab. | Protein                  | Tot. Peptides | Unique Peptides | Best Gene Name       | Scan # | Charge | Delta Mass | Peptide Prophet Score | Peptide Sequence        |
|-----------------|--------------------------|---------------|-----------------|----------------------|--------|--------|------------|-----------------------|-------------------------|
| 0,9756          | IPI00375407, IPI00028387 | 1             | 1               | C20orf116, C20orf116 | 1678   | 2+     | +0,0055    | 0,9990                | R.AASAGQEPLHNEELAGAGR.V |

### Peptide Details

#### Peptide Details

##### SHOW MODIFICATIONS

|              |           |                 |          |          |                                                                                      |
|--------------|-----------|-----------------|----------|----------|--------------------------------------------------------------------------------------|
| Scan         | 1678      | Delta Mass      | + 0.0055 | Protein  | IPI00028387                                                                          |
| Mass         | 1877.9100 | Next            | 301.000  | Fraction | VF_T13H_band05.mzXML                                                                 |
| Hyper        | 570.000   | Peptide Prophet | 1.00     | Run      | VF_T13H_band05.pep.xml (Vitor/VF_T13H_band05 (VF_SILAC_AssimWindow_NewPL_4da_Human)) |
| Protein Hits | 2         | Ion Percent     | 75%      |          |                                                                                      |
| Charge       | 2+        | B               | 1.000    |          |                                                                                      |

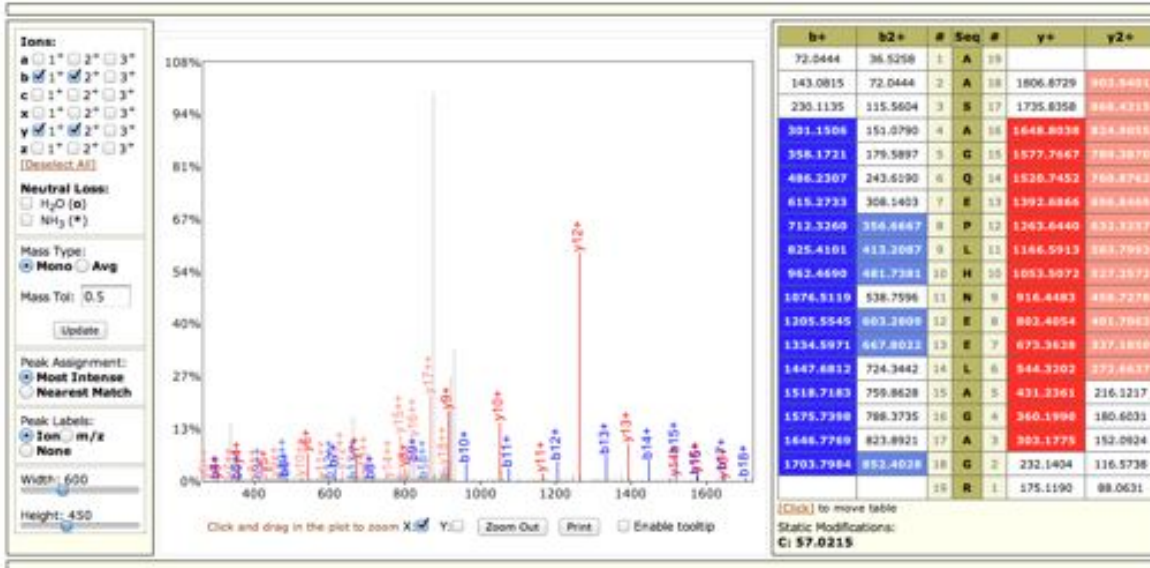

| Protein Probab. | Protein                                     | Tot. Peptides | Unique Peptides | Best Gene Name | Scan # | Charge | Delta Mass | Peptide Prophet Score | Peptide Sequence          |
|-----------------|---------------------------------------------|---------------|-----------------|----------------|--------|--------|------------|-----------------------|---------------------------|
| 0,9880          | IPI00385901,<br>IPI00908298,<br>IPI00470631 | 1             | 1               | COQ9,<br>COQ9  | 2+     | 1681   | -0,0275    | 1,0000                | R.YTDQGGEEEEEDYESEELQHR.I |

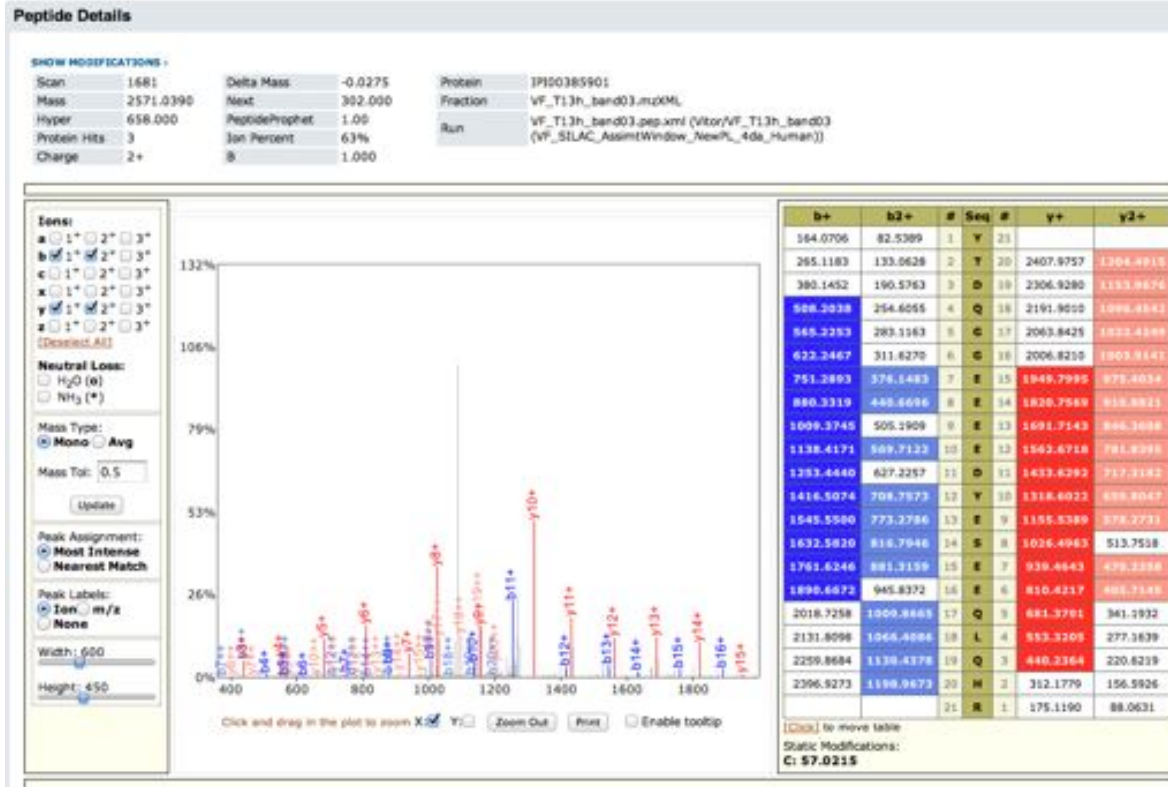

| Protein Probab. | Protein                                     | Tot. Peptides | Unique Peptides | Best Gene Name | Scan # | Charge | Delta Mass | Peptide Prophet Score | Peptide Sequence     |
|-----------------|---------------------------------------------|---------------|-----------------|----------------|--------|--------|------------|-----------------------|----------------------|
| 0,9672          | IPI00909884,<br>IPI00012772,<br>IPI00797230 | 1             | 1               | RPL8,<br>RPL8  | 2+     | 1697   | -0,0172    | 0,9982                | R.ASGNYATVISHNPETK.K |

### Peptide Details

#### Peptide Details

##### SHOW MODIFICATIONS

|              |           |                |         |
|--------------|-----------|----------------|---------|
| Scan         | 1697      | Delta Mass     | -0.0172 |
| Mass         | 1688.8240 | Next           | 211.000 |
| Hyper        | 353.000   | PeptideProphet | 1.00    |
| Protein Hits | 3         | Ion Percent    | 80%     |
| Charge       | 2+        | B              | 1.000   |

|          |                                                                                      |
|----------|--------------------------------------------------------------------------------------|
| Protein  | IP00012772                                                                           |
| Fraction | VF_T13h_band03.mzXML                                                                 |
| Run      | VF_T13h_band03.pep.xml (Vitor/VF_T13h_band03 (vF_SILAC_AssmtWindow_NewPL_4da_Human)) |

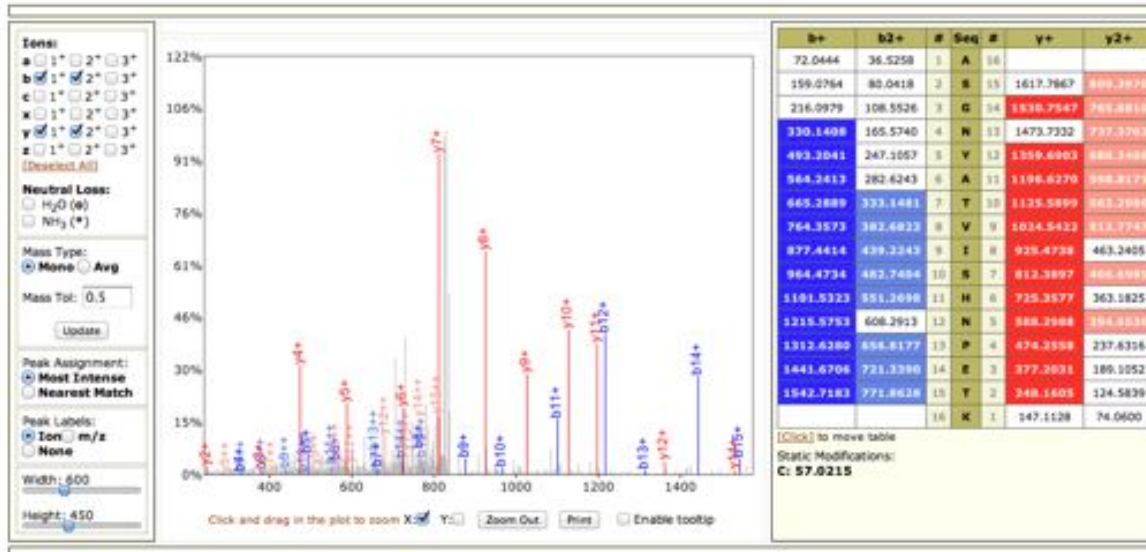

| Protein Probab. | Protein                     | Tot. Peptides | Unique Peptides | Best Gene Name | Scan # | Charge | Delta Mass | Peptide Prophet Score | Peptide Sequence       |
|-----------------|-----------------------------|---------------|-----------------|----------------|--------|--------|------------|-----------------------|------------------------|
| 0,9869          | IP100794067,<br>IP100093057 | 1             | 1               | CPOX,<br>CPOX  | 1713   | 2+     | -0,0185    | 0,9999                | R.ATSLGRPEEEEEDELAHR.C |

#### Peptide Details

##### SHOW MODIFICATIONS :

|              |           |                |         |
|--------------|-----------|----------------|---------|
| Scan         | 1713      | Delta Mass     | -0.0185 |
| Mass         | 1938.9150 | Next           | 359.000 |
| Hyper        | 641.000   | PeptideProphet | 1.00    |
| Protein Hits | 2         | Ion Percent    | 75%     |
| Charge       | 2+        | B.             | 2.000   |

|          |                                                                                        |
|----------|----------------------------------------------------------------------------------------|
| Protein  | IP100093057                                                                            |
| Fraction | VF_T13h_band03.mzXML                                                                   |
| Run      | VF_T13h_band03 pep.xml (Vitor/VF_T13h_band03<br>(VF_SLAC_AssmtWindow_NewPL_4ds_Human)) |

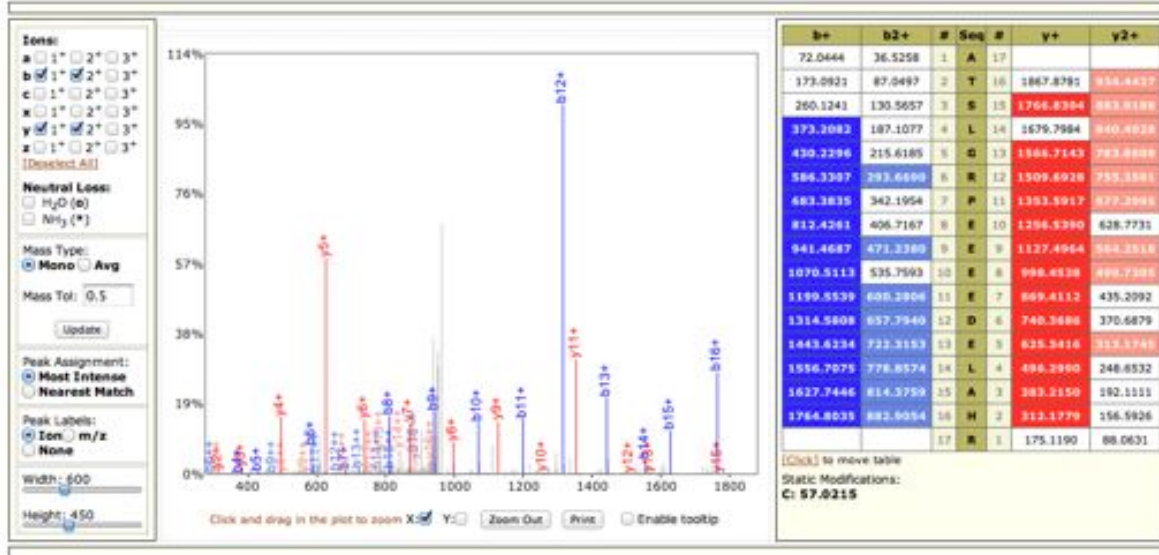

| Protein Probab. | Protein                                                                                                     | Tot. Peptides | Unique Peptides | Best Gene Name                                                            | Scan# | Charge | Delta Mass | Peptide Prophet Score | Peptide Sequence     |
|-----------------|-------------------------------------------------------------------------------------------------------------|---------------|-----------------|---------------------------------------------------------------------------|-------|--------|------------|-----------------------|----------------------|
| 0,8713          | IPI00643765,<br>IPI00886965,<br>IPI00888198,<br>IPI00410496,<br>IPI00550900,<br>IPI00009943,<br>IPI00014402 | 1             | 1               | TPT1,<br>LOC389787,<br>LOC389787,<br>FLJ44635,<br>TPT1,<br>TPT1,<br>HUWE1 | 1767  | 2+     | -0,0137    | 0,9913                | R.VK'PFM"TGAAEQIK'.H |

Peptide Details

SHOW MODIFICATIONS -

|                 |                      |                                                   |
|-----------------|----------------------|---------------------------------------------------|
| Scan: 1767      | Delta Mass: -0.0137  | Protein: IPI00009943                              |
| Mass: 1447.8020 | Next: 270.000        | Fraction: VF_T13h_band04.mzXML                    |
| Hyper: 367.000  | PeptideProphet: 0.99 | Run: VF_T13h_band04.pep.xml (Vitor/VF_T13h_band04 |
| Protein Hits: 7 | Ion Percent: 75%     | (VF_SILAC_AssmtWindow_NewPL_4da_Human)            |
| Charge: 2+      | B: 1.000             |                                                   |

- 1\*  2\*  3\*  
 1\*  2\*  3\*  
 1\*  2\*  3\*  
 1\*  2\*  3\*  
 1\*  2\*  3\*  
 1\*  2\*  3\*  
 1\*  2\*  3\*  
 1\*  2\*  3\*

- Neutral Loss:  
 H<sub>2</sub>O (0)  
 NH<sub>3</sub> (1\*)

- Mass Type:  
 Mono  Avg

Mass Tol: 0.5

- Peak Assignment:  
 Most Intense  Nearest Match

- Peak Labels:  
 Ion\_m/z  None

Width: 600  
Height: 450

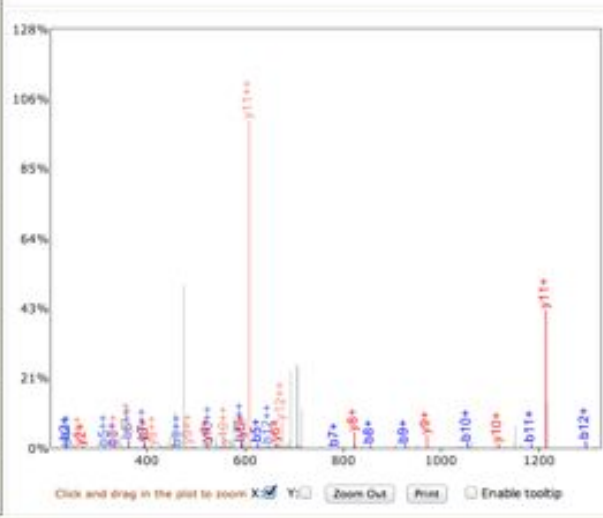

| b+        | b2+      | #  | Seq # | y+ | y2+       |
|-----------|----------|----|-------|----|-----------|
| 100.0757  | 50.5415  | 1  | V     | 13 |           |
| 334.1988  | 117.5990 | 2  | K     | 12 | 1348.7331 |
| 331.2439  | 166.1254 | 3  | P     | 11 | 1234.4181 |
| 478.3319  | 339.6594 | 4  | F     | 10 | 1117.3653 |
| 623.3473  | 313.1773 | 5  | M     | 9  | 879.4969  |
| 726.3950  | 343.7011 | 6  | T     | 8  | 823.4615  |
| 783.4169  | 392.2119 | 7  | G     | 7  | 722.4138  |
| 884.4536  | 427.7304 | 8  | A     | 6  | 665.3924  |
| 928.4997  | 463.2490 | 9  | A     | 5  | 594.3553  |
| 1054.5333 | 527.7793 | 10 | E     | 4  | 523.3181  |
| 1182.5919 | 591.7996 | 11 | Q     | 3  | 394.2755  |
| 1289.6799 | 648.3416 | 12 | E     | 2  | 364.2170  |
|           |          | 13 | K     | 1  | 153.1329  |

[Click] to move table  
 Static Modifications:  
 C: 57.0215  
 Variable Modifications:  
 K: 6.0201  
 M: 15.9949

| Protein Probab. | Protein                     | Tot. Peptides | Unique Peptides | Best Gene Name    | Scan # | Charge | Delta Mass | Peptide Prophet Score | Peptide Sequence               |
|-----------------|-----------------------------|---------------|-----------------|-------------------|--------|--------|------------|-----------------------|--------------------------------|
| 0,9743          | IPI00748354,<br>IPI00177428 | 1             | 1               | CHCHD4,<br>CHCHD4 | 1780   | 2+     | -0,0358    | 0,9986                | K.K'PAEQAEETAPEIATATK'EEEGSS.- |

### Peptide Details

#### SHOW MODIFICATIONS -

|              |           |                |         |          |                                                                                      |
|--------------|-----------|----------------|---------|----------|--------------------------------------------------------------------------------------|
| Scan         | 1780      | Delta Mass     | -0.0358 | Protein  | IPI00177428                                                                          |
| Mass         | 2515.2060 | Next           | 253.000 | Fraction | VF_T13h_band06.mzXML                                                                 |
| Hyper        | 527.000   | PeptideProphet | 1.00    | Run      | VF_T13h_band06.pep.xml (Vitor/VF_T13h_band06 (VF_SILAC_AssmtWindow_NewPL_4da_Human)) |
| Protein Hits | 2         | Ion Percent    | 63%     |          |                                                                                      |
| Charge       | 2+        | B              | 1.000   |          |                                                                                      |

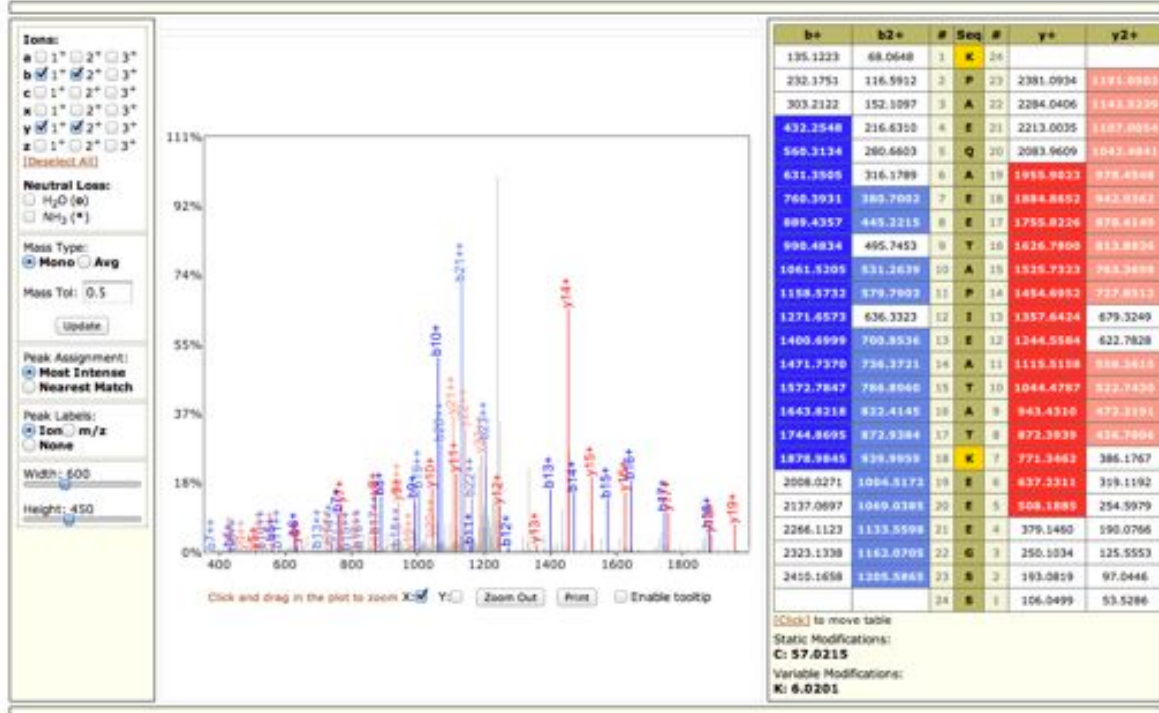

| Protein Probab. | Protein                  | Tot. Peptides | Unique Peptides | Best Gene Name | Scan # | Charge | Delta Mass | Peptide Prophet Score | Peptide Sequence     |
|-----------------|--------------------------|---------------|-----------------|----------------|--------|--------|------------|-----------------------|----------------------|
| 0,9792          | IP100329321, IP100873110 | 1             | 1               | LYRM7, LYRM7   | 1798   | 2+     | -0,0195    | 0,9993                | R.TSVIQGIHTDHNTLK'.L |

### Peptide Details

#### SHOW MODIFICATIONS -

|                 |                      |                                                                                           |
|-----------------|----------------------|-------------------------------------------------------------------------------------------|
| Scan: 1798      | Delta Mass: -0.0195  | Protein: IP00329321                                                                       |
| Mass: 1669.8960 | Next: 219.000        | Fraction: VF_T13h_band05.mz0M                                                             |
| Hyper: 378.000  | PeptideProphet: 1.00 | Run: VF_T13h_band05.pep.eml (Vitor/VF_T13h_band05 (VF_SILAC_AssmtWindow_NewPL_4ds_Human)) |
| Protein Hits: 2 | Ion Percent: 79%     |                                                                                           |
| Charge: 2+      | B: 1.000             |                                                                                           |

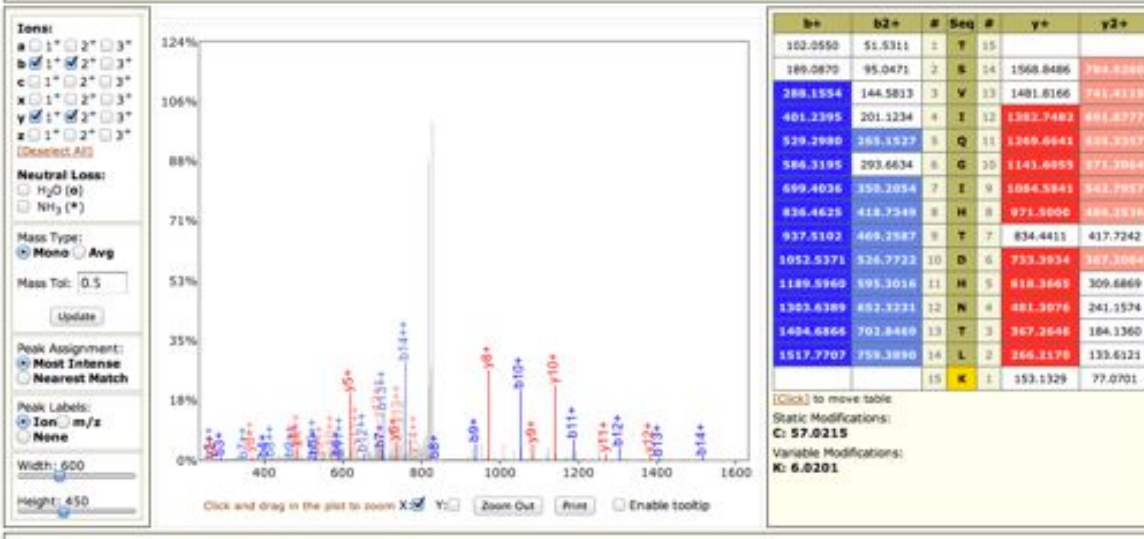

| Protein Probab. | Protein                                     | Tot. Peptides | Unique Peptides | Best Gene Name            | Scan # | Charge | Delta Mass | Peptide Prophet Score | Peptide Sequence             |
|-----------------|---------------------------------------------|---------------|-----------------|---------------------------|--------|--------|------------|-----------------------|------------------------------|
| 0,9362          | IPI00023048,<br>IPI00789435,<br>IPI00642971 | 1             | 1               | EEF1D,<br>EEF1D,<br>EEF1D | 1807   | 2+     | +0,9751    | 0,9965                | K.SLAGSSGPGASSGTSGDHGELVVR.I |

### Peptide Details

#### SHOW MODIFICATIONS

|              |           |                 |         |          |                                                                                      |
|--------------|-----------|-----------------|---------|----------|--------------------------------------------------------------------------------------|
| Scan         | 1807      | Delta Mass      | +0.9751 | Protein  | IPI00023048                                                                          |
| Mass         | 2185.0480 | Next            | 307.000 | Fraction | VF_T13h_band04.mzXML                                                                 |
| Hyper        | 508.000   | Peptide/Prophet | 1.00    | Run      | VF_T13h_band04.pep.xml (Vitor/VF_T13h_band04 (VF_SILAC_AssmtWindow_NewPL_4da_Human)) |
| Protein Hits | 3         | Ion Percent     | 72%     |          |                                                                                      |
| Charge       | 2+        | B               | 1.000   |          |                                                                                      |

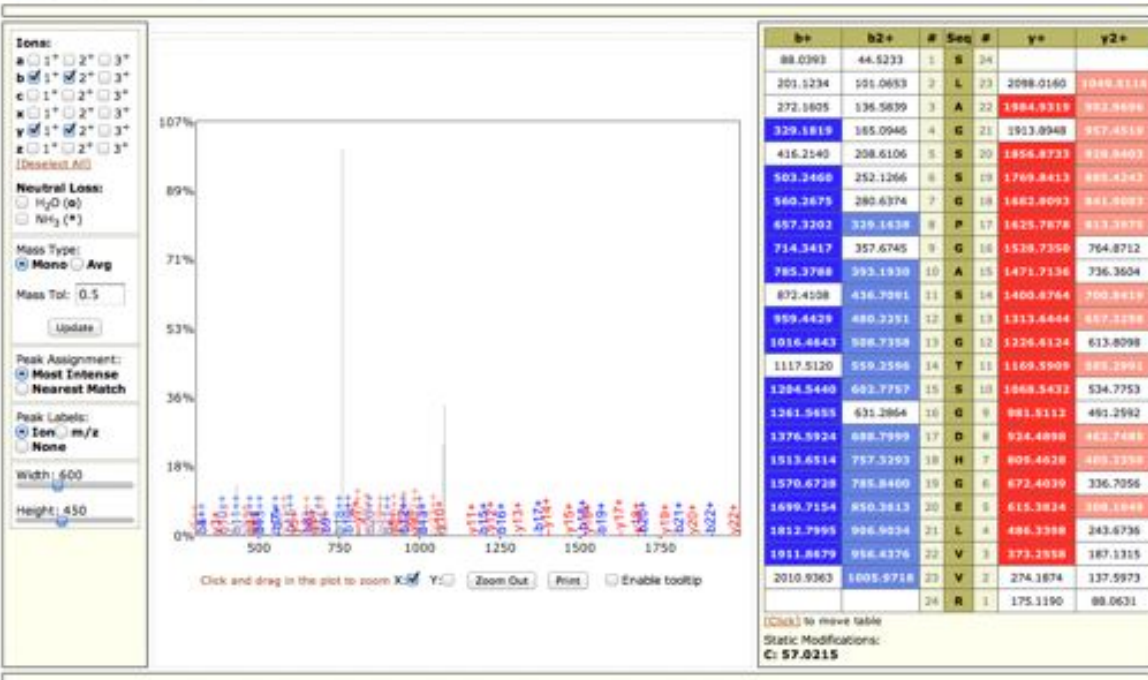

| b+        | b2+       | #  | Seq. # | y+        | y2+       |
|-----------|-----------|----|--------|-----------|-----------|
| 88.0393   | 44.5233   | 1  | S 34   |           |           |
| 201.1234  | 101.0617  | 2  | L 73   | 2098.0160 | 1049.0118 |
| 272.1805  | 136.5839  | 3  | A 22   | 1884.9319 | 942.4698  |
| 329.1819  | 165.0946  | 4  | G 21   | 1913.8948 | 957.4518  |
| 416.2140  | 208.6106  | 5  | S 20   | 1854.8733 | 928.4403  |
| 503.2460  | 252.1266  | 6  | S 19   | 1769.8413 | 885.4203  |
| 560.2675  | 280.6374  | 7  | G 18   | 1682.8093 | 841.4003  |
| 657.3202  | 329.1634  | 8  | P 17   | 1625.7878 | 813.3878  |
| 714.3417  | 357.6745  | 9  | G 16   | 1538.7358 | 769.3712  |
| 783.3768  | 393.1930  | 10 | A 15   | 1471.7138 | 736.3604  |
| 872.4108  | 436.7091  | 11 | S 14   | 1400.6764 | 700.3419  |
| 959.4429  | 480.2291  | 12 | S 13   | 1313.6444 | 657.3208  |
| 1016.4643 | 508.7358  | 13 | G 12   | 1226.6124 | 613.3098  |
| 1117.5120 | 559.2566  | 14 | T 11   | 1169.5909 | 585.2951  |
| 1204.5440 | 603.7757  | 15 | S 10   | 1088.5432 | 534.2753  |
| 1261.5655 | 631.2864  | 16 | G 9    | 991.5112  | 491.2592  |
| 1376.5924 | 688.7959  | 17 | D 8    | 924.4898  | 462.2448  |
| 1513.6314 | 757.3203  | 18 | H 7    | 805.4628  | 403.2308  |
| 1570.6738 | 785.8460  | 19 | G 6    | 672.4039  | 336.2056  |
| 1699.7104 | 850.3613  | 20 | E 5    | 615.3824  | 308.1918  |
| 1812.7995 | 906.9034  | 21 | L 4    | 486.3388  | 243.6736  |
| 1911.8679 | 956.4374  | 22 | V 3    | 373.2858  | 187.1315  |
| 2010.9363 | 1005.9718 | 23 | V 2    | 274.1874  | 137.5973  |
|           |           | 24 | R 1    | 175.1190  | 88.0631   |

Static Modifications:  
C: 57.0215



| Protein Probab. | Protein                     | Tot. Peptides | Unique Peptides | Best Gene Name  | Scan # | Charge | Delta Mass | Peptide Prophet Score | Peptide Sequence |
|-----------------|-----------------------------|---------------|-----------------|-----------------|--------|--------|------------|-----------------------|------------------|
| 0,9857          | IPI00884222,<br>IPI00009865 | 1             | 1               | KRT10,<br>KRT10 | 1819   | 2+     | -0,0164    | 0,9998                | R.ALEESNYELEGK.I |

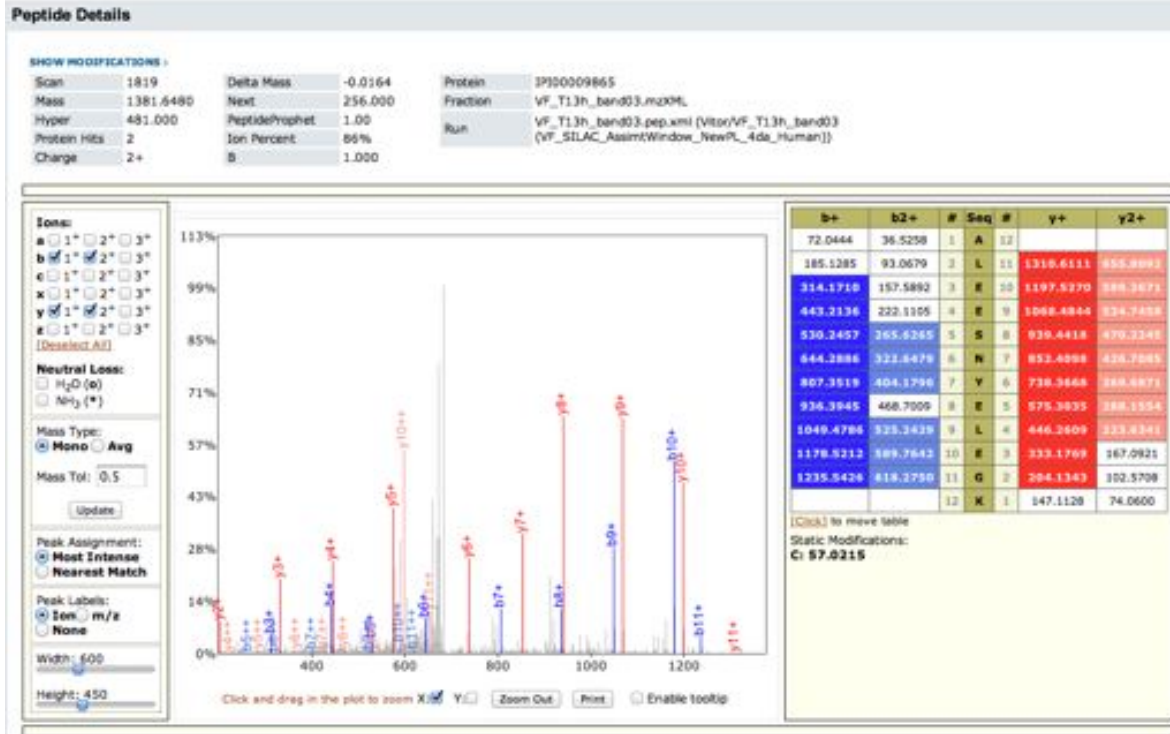

| Protein Probab. | Protein                                                     | Tot. Peptides | Unique Peptides | Best Gene Name                    | Scan # | Charge | Delta Mass | Peptide Prophet Score | Peptide Sequence   |
|-----------------|-------------------------------------------------------------|---------------|-----------------|-----------------------------------|--------|--------|------------|-----------------------|--------------------|
| 0,9765          | IP100894086,<br>IP100892745,<br>IP100643101,<br>IP100295240 | 1             | 1               | CPNE1,<br>CPNE1,<br>NFS1,<br>NFS1 | 1827   | 2+     | -0,0167    | 0,9997                | R.AIGTDEDLAHSSIR.F |

### Peptide Details

#### SHOW MODIFICATIONS

|              |           |                 |         |          |                                                                                          |
|--------------|-----------|-----------------|---------|----------|------------------------------------------------------------------------------------------|
| Scan         | 1827      | Delta Mass      | -0.0167 | Protein  | IP00295240                                                                               |
| Mass         | 1484.7340 | Next            | 233.000 | Fraction | VF_T13h_band02.mzXML                                                                     |
| Hyper        | 435.000   | Peptide/Prophet | 1.00    | Run      | VF_T13h_band02.pep.xml (Vitor/VF_T13h_band02<br>[VF_SILAC_AssimtWindow_NewPL_4da_Human]) |
| Protein Hits | 4         | Ion Percent     | 77%     |          |                                                                                          |
| Charge       | 2+        | B               | 1.000   |          |                                                                                          |

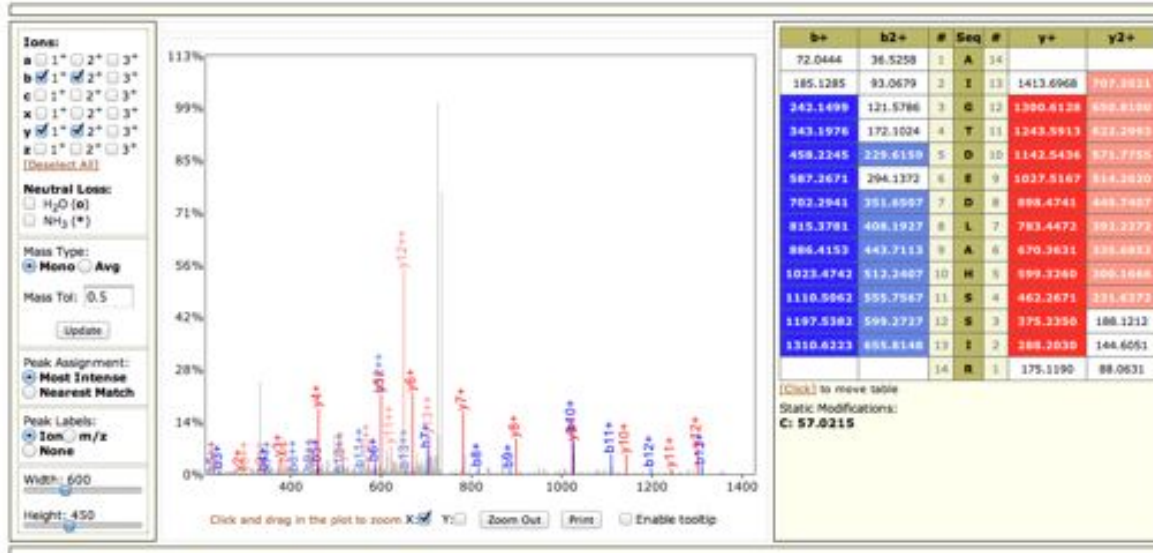

| Protein Probab. | Protein                     | Tot. Peptides | Unique Peptides | Best Gene Name | Scan # | Charge | Delta Mass | Peptide Prophet Score | Peptide Sequence |
|-----------------|-----------------------------|---------------|-----------------|----------------|--------|--------|------------|-----------------------|------------------|
| 0,9255          | IPI00744902,<br>IPI00024670 | 1             | 1               | DP1,<br>REEP5  | 1849   | 2+     | -0,0170    | 0,9937                | K.KATVNLLGEEK.K  |

### Peptide Details

#### SHOW MODIFICATIONS

|                 |                      |                                                  |
|-----------------|----------------------|--------------------------------------------------|
| Scan: 1849      | Delta Mass: -0.0170  | Protein: IPI00024670                             |
| Mass: 1201.6790 | Next: 320.000        | Fraction: VF_T13H_band06.mzXML                   |
| Hyper: 427.000  | PeptideProphet: 0.99 | Run: VF_T13H_band06.pep.xml (View/VF_T13H_band06 |
| Protein Hits: 2 | Ion Percent: 90%     | [VF_SILAC_AssmtWindow_NewPL_4ds_Human])          |
| Charge: 2+      | B: 1.000             |                                                  |

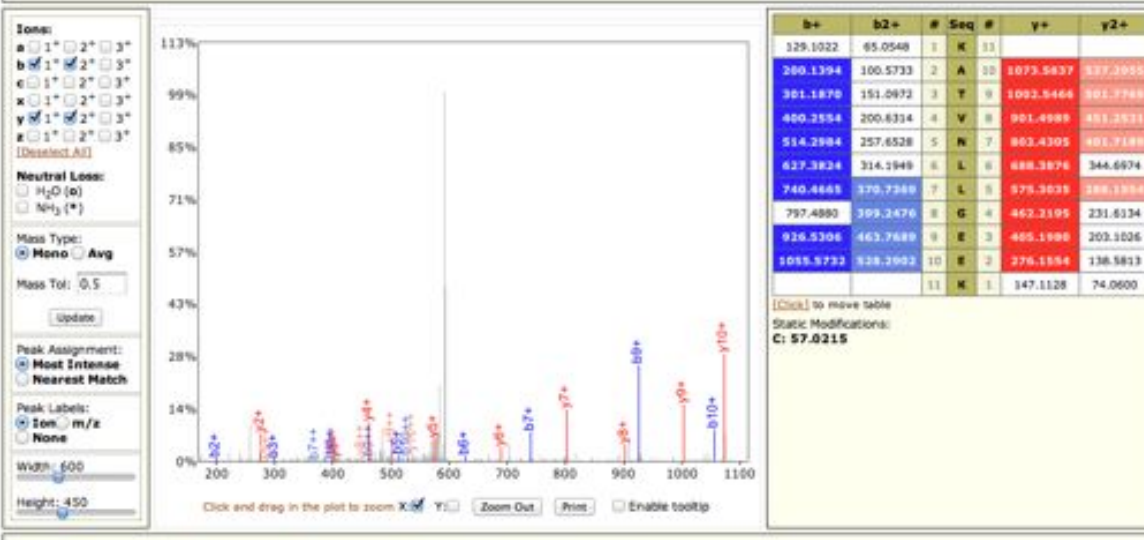

| b+        | b2+      | #  | Seq # | y+        | y2+      |
|-----------|----------|----|-------|-----------|----------|
| 329.1022  | 65.0548  | 1  | K 11  |           |          |
| 380.1394  | 100.5733 | 2  | A 10  | 1073.5837 | 137.3095 |
| 391.1870  | 151.0973 | 3  | T 9   | 1093.5464 | 301.7768 |
| 480.3554  | 200.6314 | 4  | V 8   | 901.4989  | 481.3531 |
| 514.2994  | 257.6528 | 5  | N 7   | 802.4305  | 481.7188 |
| 627.3824  | 314.1949 | 6  | L 6   | 688.3876  | 344.6974 |
| 740.4663  | 370.7369 | 7  | L 5   | 875.3033  | 188.1894 |
| 797.4880  | 399.2476 | 8  | G 4   | 462.2195  | 231.6134 |
| 926.5304  | 463.7689 | 9  | E 3   | 405.1980  | 202.1026 |
| 1055.5733 | 528.2992 | 10 | E 2   | 376.1854  | 138.5813 |
|           |          | 11 | K 1   | 347.1128  | 74.0600  |

[Click] to move table  
 Static Modifications:  
 C: 57.0215

| Protein Probab. | Protein     | Tot. Peptides | Unique Peptides | Best Gene Name | Scan # | Charge | Delta Mass | Peptide Prophet Score | Peptide Sequence |
|-----------------|-------------|---------------|-----------------|----------------|--------|--------|------------|-----------------------|------------------|
| 0,9840          | IPI00301364 | 1             | 1               | SKP1A          | 1865   | 2+     | -0,0169    | 0,9997                | K.NDFTEEEEAQVR.K |

### Peptide Details

#### SHOW MODIFICATIONS -

|              |           |                |         |          |                                                                                     |
|--------------|-----------|----------------|---------|----------|-------------------------------------------------------------------------------------|
| Scan         | 1865      | Delta Mass     | -0.0169 | Protein  | IPI00301364                                                                         |
| Mass         | 1466.6390 | Next           | 263.000 | Fraction | VF_T13h_band05.mzXML                                                                |
| Hyper        | 445.000   | PeptideProphet | 1.00    | Run      | VF_T13h_band05.pep.xml (Vfor/VF_T13h_band05 [VF_SILAC_AssimWindow_NewPL_4da_Human]) |
| Protein Hits | 1         | Ion Percent    | 77%     |          |                                                                                     |
| Charge       | 2+        | B              | 1.000   |          |                                                                                     |

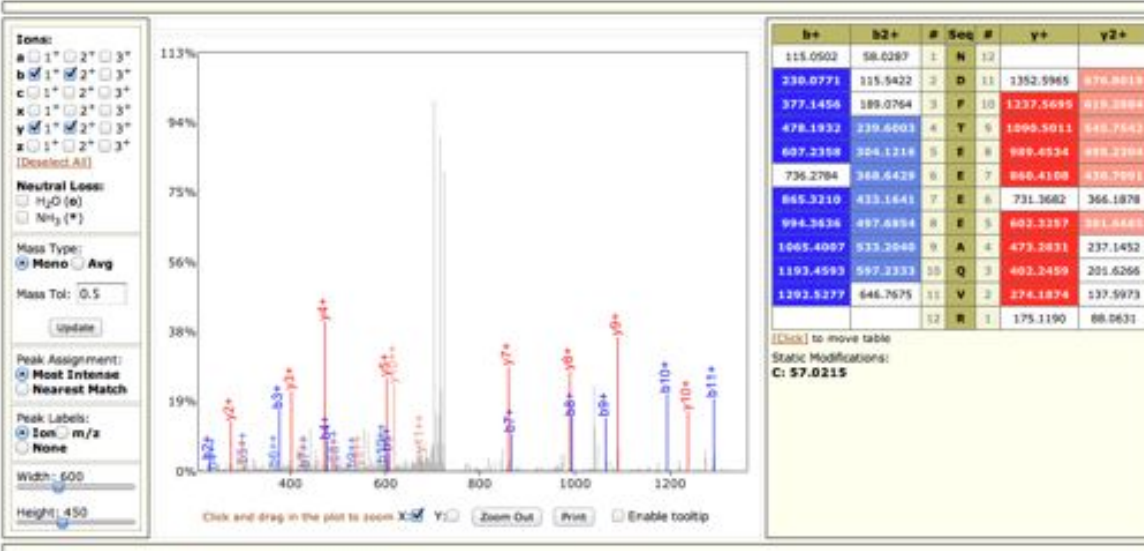

| Protein Probab. | Protein                                     | Tot. Peptides | Unique Peptides | Best Gene Name                           | Scan # | Charge | Delta Mass | Peptide Prophet Score | Peptide Sequence    |
|-----------------|---------------------------------------------|---------------|-----------------|------------------------------------------|--------|--------|------------|-----------------------|---------------------|
| 0,8635          | IPI00414696,<br>IPI00396378,<br>IPI00874030 | 1             | 1               | HNRNPA2B1<br>,<br>HNRPA2B1,<br>HNRNPA2B1 | 1920   | 2+     | -0,0136    | 0,9925                | R.GGGGNFGPGPGSNFR.G |

### Peptide Details

#### SHOW MODIFICATIONS -

|              |           |                |         |          |                                                                                      |
|--------------|-----------|----------------|---------|----------|--------------------------------------------------------------------------------------|
| Scan         | 1920      | Delta Mass     | -0.0136 | Protein  | D000396378                                                                           |
| Mass         | 1377.6290 | Next           | 283.000 | Fraction | VF_T13h_band02.mz0M                                                                  |
| Hyper        | 387.000   | PeptideProphet | 0.99    | Run      | VF_T13h_band02.pep.xml (Vitor/VF_T13h_band02 (VF_SILAC_AssimWindow_NewPl_4da_Human)) |
| Protein Hits | 3         | Ion Percent    | 61%     |          |                                                                                      |
| Charge       | 2+        | B              | 1.000   |          |                                                                                      |

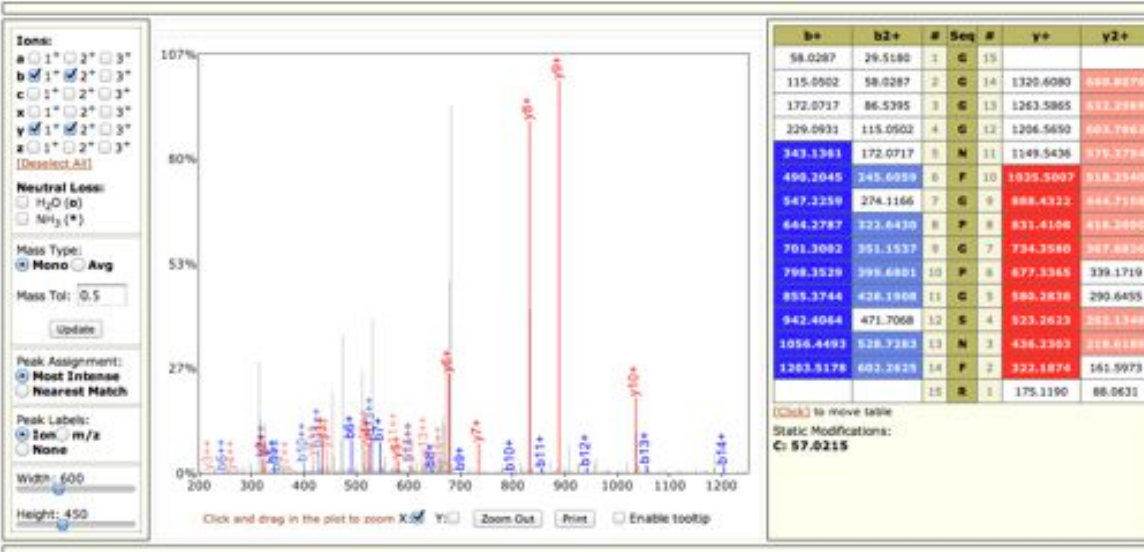

| Protein Probab. | Protein                     | Tot. Peptides | Unique Peptides | Best Gene Name      | Scan # | Charge | Delta Mass | Peptide Prophet Score | Peptide Sequence |
|-----------------|-----------------------------|---------------|-----------------|---------------------|--------|--------|------------|-----------------------|------------------|
| 0,9796          | IPI00797958,<br>IPI00399053 | 1             | 1               | C3orf60,<br>C3orf60 | 1945   | 2+     | -0,0148    | 0,9991                | R.LSPADDELYQR.T  |

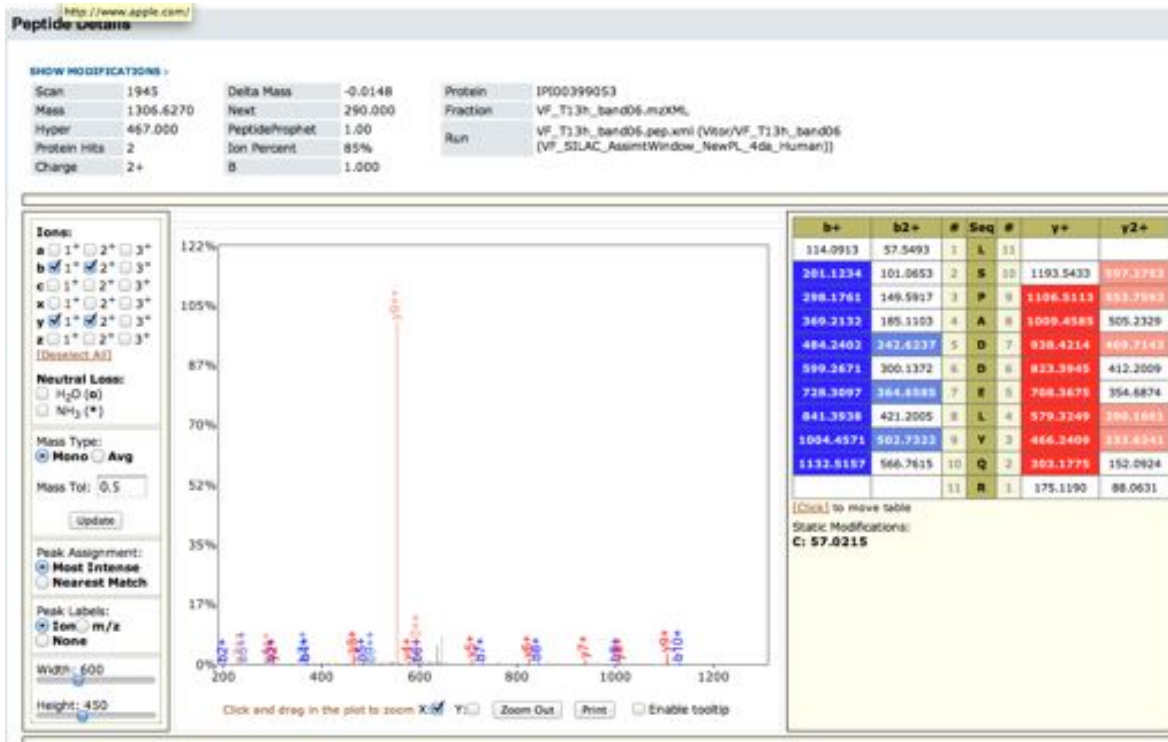

| Protein Probab. | Protein                  | Tot. Peptides | Unique Peptides | Best Gene Name | Scan # | Charge | Delta Mass | Peptide Prophet Score | Peptide Sequence  |
|-----------------|--------------------------|---------------|-----------------|----------------|--------|--------|------------|-----------------------|-------------------|
| 0,9729          | IP100796868, IP100305423 | 1             | 1               | CHMP6, CHMP6   | 1946   | 2+     | -0,0162    | 0,9987                | R.ILDETQEAVEYQR.Q |

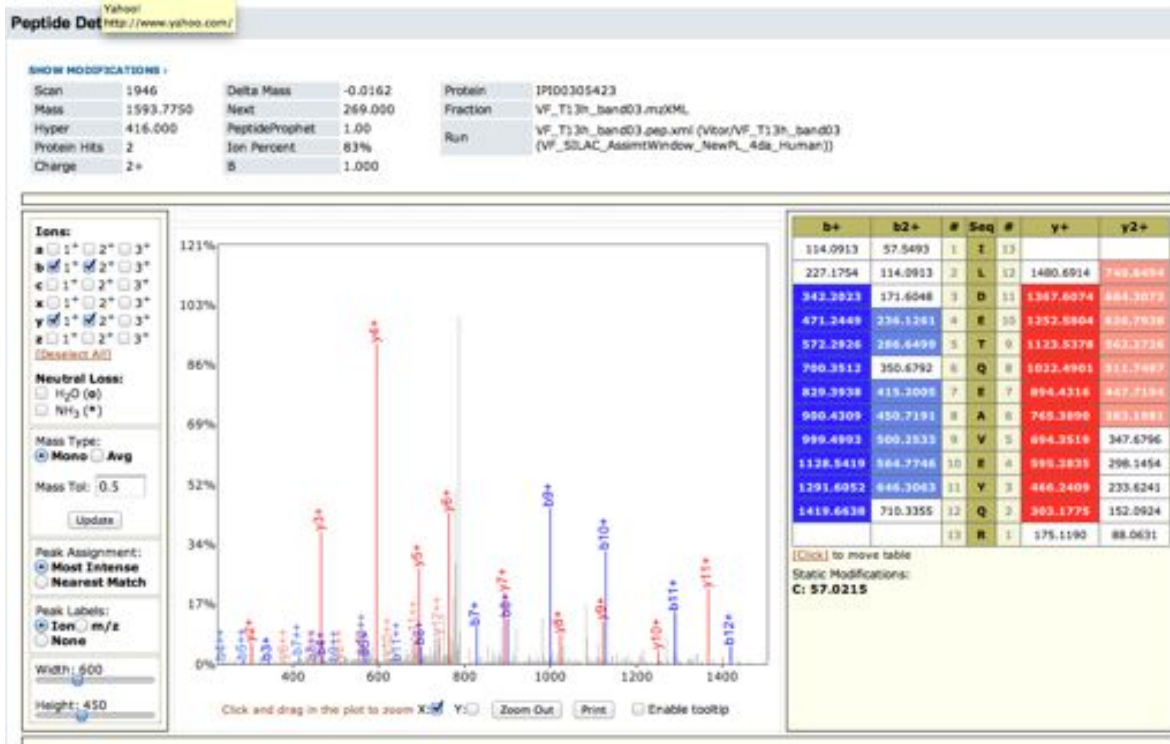

| Protein Probab. | Protein                  | Tot. Peptides | Unique Peptides | Best Gene Name   | Scan # | Charge | Delta Mass | Peptide Prophet Score | Peptide Sequence |
|-----------------|--------------------------|---------------|-----------------|------------------|--------|--------|------------|-----------------------|------------------|
| 0,9768          | IP100797958, IP100399053 | 1             | 1               | C3orf60, C3orf60 | 1949   | 2+     | -0,0145    | 0,9991                | R.LSPADDELYQR.T  |

### Peptide Details

#### SHOW MODIFICATIONS -

|                 |                      |                                                                                            |
|-----------------|----------------------|--------------------------------------------------------------------------------------------|
| Scan: 1949      | Delta Mass: -0.0145  | Protein: IP00399053                                                                        |
| Mass: 1306.6270 | Next: 293.000        | Fraction: VF_T13h_band05.mz0M                                                              |
| Hyper: 439.000  | PeptideProphet: 1.00 | Run: VF_T13h_band05.pep.xml (Vitor/VF_T13h_band05 [VF_SILAC_AssimtWindow_NewPL_4da_Human]) |
| Protein Hits: 2 | Ion Percent: 85%     |                                                                                            |
| Charge: 2+      | B: 1.000             |                                                                                            |

#### Ions:

- 1<sup>+</sup>  2<sup>+</sup>  3<sup>+</sup>  
 1<sup>+</sup>  2<sup>+</sup>  3<sup>+</sup>

[Deselect All]

#### Neutral Loss:

- H<sub>2</sub>O (0)  
 NH<sub>3</sub> (\*)

#### Mass Type:

- Mono  Avg

Mass Tol: 0.5

[Update]

#### Peak Assignment:

- Most Intense  Nearest Match

#### Peak Labels:

- Ion m/z  None

Width: 600

Height: 450

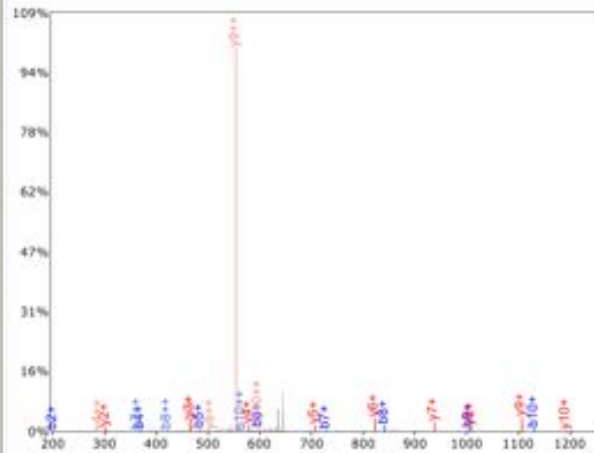

| b+        | b2+      | #  | Seq # | y+        | y2+      |
|-----------|----------|----|-------|-----------|----------|
| 124.0953  | 57.5493  | 1  | L 11  |           |          |
| 261.1234  | 101.0653 | 2  | S 10  | 1193.5433 | 397.3753 |
| 298.1761  | 149.5917 | 3  | P 9   | 1106.5113 | 353.7933 |
| 369.3132  | 185.1103 | 4  | A 8   | 1009.4583 | 305.3319 |
| 484.2402  | 242.6237 | 5  | D 7   | 838.4214  | 469.7143 |
| 599.3671  | 300.1372 | 6  | D 6   | 823.3945  | 412.2009 |
| 728.3097  | 364.6585 | 7  | E 5   | 708.3675  | 354.8874 |
| 841.3938  | 421.2095 | 8  | L 8   | 579.3249  | 399.1681 |
| 1004.4971 | 502.7322 | 9  | Y 3   | 466.3409  | 233.6241 |
| 1132.6187 | 568.7618 | 10 | Q 2   | 303.1779  | 152.0824 |
|           |          | 11 | R 1   | 175.1190  | 88.0631  |

[Click] to move table

Static Modifications:

C: 57.0215



| Protein Probab. | Protein                                     | Tot. Peptides | Unique Peptides | Best Gene Name         | Scan # | Charge | Delta Mass | Peptide Prophet Score | Peptide Sequence     |
|-----------------|---------------------------------------------|---------------|-----------------|------------------------|--------|--------|------------|-----------------------|----------------------|
| 0,9433          | IPI00908477,<br>IPI00019906,<br>IPI00218019 | 1             | 1               | -,<br>hEMMPRIN,<br>BSG | 1954   | 2+     | -0,0160    | 0,9962                | K.GGVVLK'EDALPGQK'.T |

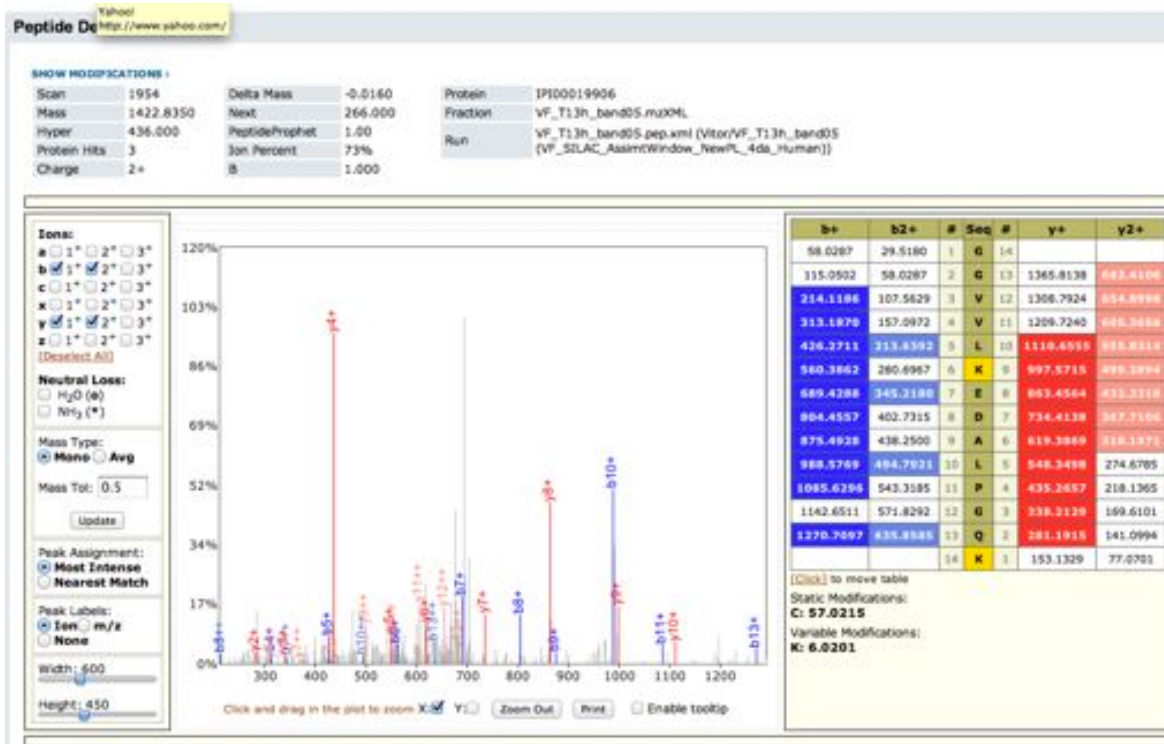

| Protein Probab. | Protein                     | Tot. Peptides | Unique Peptides | Best Gene Name | Scan # | Charge | Delta Mass | Peptide Prophet Score | Peptide Sequence      |
|-----------------|-----------------------------|---------------|-----------------|----------------|--------|--------|------------|-----------------------|-----------------------|
| 0,8607          | IP100853215,<br>IP100027430 | 1             | 1               | SPN,<br>SPN    | 1982   | 2+     | -0,0149    | 0,9923                | R.TSGAPVTTAASSLETSR.G |

### Peptide Details

#### SHOW MODIFICATIONS

|              |           |                 |         |          |                                                                                      |
|--------------|-----------|-----------------|---------|----------|--------------------------------------------------------------------------------------|
| Scan         | 1982      | Delta Mass      | -0.0149 | Protein  | IP100027430                                                                          |
| Mass         | 1635.8180 | Next            | 234.000 | Fraction | VF_T13h_band02.mzXML                                                                 |
| Hyper        | 344.000   | Peptide/Prophet | 0.99    | Run      | VF_T13h_band02.pep.xml (Vitor/VF_T13h_band02 (VF_SILAC_AssmtWindow_NewPL_4da_Human)) |
| Protein Hits | 2         | Ion Percent     | 66%     |          |                                                                                      |
| Charge       | 2+        | B               | 1.000   |          |                                                                                      |

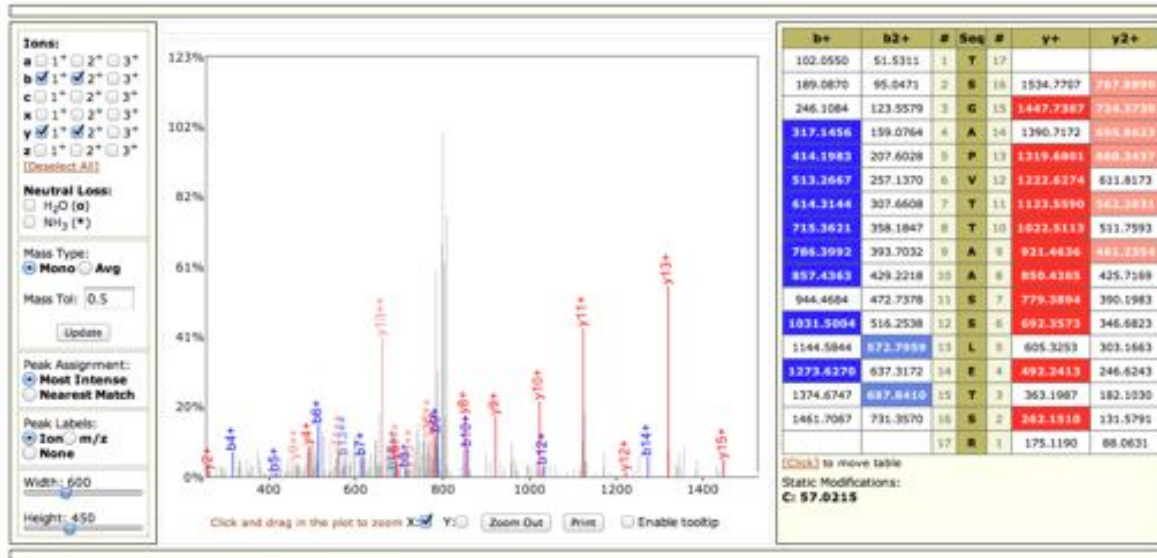

| Protein Probab. | Protein                  | Tot. Peptides | Unique Peptides | Best Gene Name | Scan # | Charge | Delta Mass | Peptide Prophet Score | Peptide Sequence |
|-----------------|--------------------------|---------------|-----------------|----------------|--------|--------|------------|-----------------------|------------------|
| 0,9764          | IP100794978, IP100030820 | 1             | 1               | MRPL47, MRPL47 | 1985   | 2+     | -0,0118    | 0,9988                | K.SGAAWTCQQLR.N  |

### Peptide Details

#### SHOW MODIFICATIONS -

|              |           |                 |         |          |                                                                                       |
|--------------|-----------|-----------------|---------|----------|---------------------------------------------------------------------------------------|
| Scan         | 1985      | Delta Mass      | -0.0118 | Protein  | IP100030820                                                                           |
| Mass         | 1277.6060 | Next            | 366.000 | Fraction | VF_T13h_band06.mzXML                                                                  |
| Hyper        | 522.000   | Peptide/prophet | 1.00    | Run      | VF_T13h_band06.pep.xml (Vitor/VF_T13h_band06 (VF_SILAC_AssimtWindow_NewPL_4da_Human)) |
| Protein Hits | 2         | Ion Percent     | 80%     |          |                                                                                       |
| Charge       | 2+        | B               | 1.000   |          |                                                                                       |

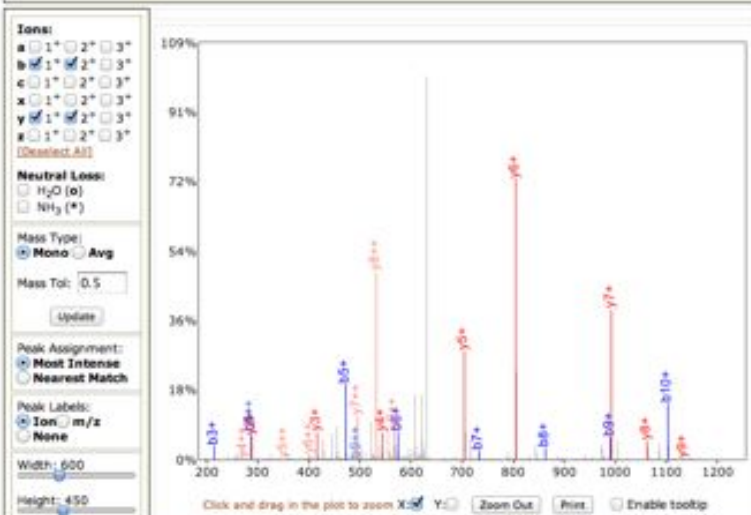

| b+        | b2+      | #  | Seq | #  | y+        | y2+      |
|-----------|----------|----|-----|----|-----------|----------|
| 88.0393   | 44.5233  | 1  | S   | 11 |           |          |
| 145.0608  | 73.0340  | 2  | G   | 10 | 1190.5735 | 595.7904 |
| 216.0979  | 108.5526 | 3  | A   | 9  | 1533.5521 | 767.2797 |
| 287.1390  | 144.0711 | 4  | A   | 8  | 1862.5150 | 931.7811 |
| 473.2143  | 237.1108 | 5  | W   | 7  | 991.4778  | 496.2418 |
| 574.2620  | 287.6346 | 6  | T   | 6  | 805.3989  | 403.2019 |
| 734.2927  | 367.4500 | 7  | C   | 5  | 794.3509  | 392.6781 |
| 863.3812  | 431.6793 | 8  | Q   | 4  | 644.3202  | 323.6637 |
| 990.4098  | 495.7086 | 9  | Q   | 3  | 416.2618  | 208.6344 |
| 1103.4938 | 552.2506 | 10 | L   | 2  | 388.3030  | 144.6051 |
|           |          | 11 | B   | 1  | 175.1190  | 88.0631  |

[Click] to move table  
 Static Modifications:  
 C: 57.0215

| Protein Probab. | Protein                                                                                     | Tot. Peptides | Unique Peptides | Best Gene Name                                                | Scan # | Charge | Delta Mass | Peptide Prophet Score | Peptide Sequence |
|-----------------|---------------------------------------------------------------------------------------------|---------------|-----------------|---------------------------------------------------------------|--------|--------|------------|-----------------------|------------------|
| 0,9174          | IPI00382804,<br>IPI00556204,<br>IPI00025447,<br>IPI00396485,<br>IPI00472724,<br>IPI00014424 | 1             | 1               | EEF1A,<br>EEF1A2,<br>EEF1A1,<br>EEF1A1,<br>EEF1AL3,<br>EEF1A2 | 1987   | 2+     | -0,0118    | 0,9959                | K.IGGIGTVPVGR.V  |

**Peptide Details** FIND MS1 FEATURES

SHOW MODIFICATIONS

|                 |                      |                                                  |
|-----------------|----------------------|--------------------------------------------------|
| Scan: 1987      | Delta Mass: -0.0118  | Protein: IPI00014424                             |
| Mass: 1025.6100 | Next: 383.000        | Fraction: VF_T13h_band01.mzXML                   |
| Hyper: 484.000  | PeptideProphet: 1.00 | Run: VF_T13h_band01.pep.xml (Vtor/VF_T13h_band01 |
| Protein Hits: 6 | Ion Percent: 95%     | (VF_SILAC_AssimWindow_NewPL_4da_Human?)          |
| Charge: 2+      | B: 1.000             |                                                  |

  

| <p><b>Ions:</b></p> <p>a <input type="checkbox"/> 1* <input type="checkbox"/> 2* <input type="checkbox"/> 3*</p> <p>b <input checked="" type="checkbox"/> 1* <input checked="" type="checkbox"/> 2* <input type="checkbox"/> 3*</p> <p>c <input type="checkbox"/> 1* <input type="checkbox"/> 2* <input type="checkbox"/> 3*</p> <p>x <input type="checkbox"/> 1* <input type="checkbox"/> 2* <input type="checkbox"/> 3*</p> <p>y <input checked="" type="checkbox"/> 1* <input checked="" type="checkbox"/> 2* <input type="checkbox"/> 3*</p> <p>z <input type="checkbox"/> 1* <input type="checkbox"/> 2* <input type="checkbox"/> 3*</p> <p><a href="#">[Deselect All]</a></p> <p><b>Neutral Loss:</b></p> <p><input type="checkbox"/> H<sub>2</sub>O (a)</p> <p><input type="checkbox"/> NH<sub>3</sub> (*)</p> <p><b>Mass Type:</b></p> <p><input checked="" type="radio"/> Mono <input type="radio"/> Avg</p> <p>Mass Tol: 0.5</p> <p><input type="button" value="Update"/></p> <p><b>Peak Assignment:</b></p> <p><input checked="" type="radio"/> Most Intense</p> <p><input type="radio"/> Nearest Match</p> <p><b>Peak Labels:</b></p> <p><input checked="" type="radio"/> Ion() m/z</p> <p><input type="radio"/> None</p> <p>Width: 600</p> <p>Height: 450</p> | <p>Click and drag in the plot to zoom. X: <input type="text"/> Y: <input type="text"/> <input type="button" value="Zoom Out"/> <input type="button" value="Print"/> <input type="checkbox"/> Enable tooltip</p> | <table border="1"> <thead> <tr> <th>b+</th> <th>b2+</th> <th>#</th> <th>Seq #</th> <th>y+</th> <th>y2+</th> </tr> </thead> <tbody> <tr> <td>114.0913</td> <td>57.5493</td> <td>1</td> <td>I 11</td> <td></td> <td></td> </tr> <tr> <td>171.1128</td> <td>86.0600</td> <td>2</td> <td>G 10</td> <td>912.9283</td> <td>888.7887</td> </tr> <tr> <td>238.1343</td> <td>114.5708</td> <td>3</td> <td>G 8</td> <td>895.5047</td> <td>438.3580</td> </tr> <tr> <td>341.2183</td> <td>171.1128</td> <td>4</td> <td>I 8</td> <td>798.4832</td> <td>399.7883</td> </tr> <tr> <td>398.2398</td> <td>199.6233</td> <td>5</td> <td>G 7</td> <td>685.3991</td> <td>343.1032</td> </tr> <tr> <td>499.2878</td> <td>250.1474</td> <td>6</td> <td>Y 6</td> <td>438.3777</td> <td>314.8933</td> </tr> <tr> <td>888.3599</td> <td>399.8816</td> <td>7</td> <td>V 5</td> <td>527.3300</td> <td>264.1686</td> </tr> <tr> <td>695.4087</td> <td>348.2090</td> <td>8</td> <td>P 4</td> <td>428.2616</td> <td>214.6344</td> </tr> <tr> <td>794.4771</td> <td>397.7422</td> <td>9</td> <td>V 3</td> <td>331.2088</td> <td>186.1081</td> </tr> <tr> <td>851.4885</td> <td>426.2829</td> <td>10</td> <td>G 2</td> <td>232.1494</td> <td>116.5738</td> </tr> <tr> <td></td> <td></td> <td>11</td> <td>K 1</td> <td>175.1190</td> <td>89.0631</td> </tr> </tbody> </table> <p><a href="#">[Click]</a> to move table</p> <p>Static Modifications:</p> <p>C: 57.0215</p> | b+    | b2+      | #        | Seq # | y+ | y2+ | 114.0913 | 57.5493 | 1 | I 11 |  |  | 171.1128 | 86.0600 | 2 | G 10 | 912.9283 | 888.7887 | 238.1343 | 114.5708 | 3 | G 8 | 895.5047 | 438.3580 | 341.2183 | 171.1128 | 4 | I 8 | 798.4832 | 399.7883 | 398.2398 | 199.6233 | 5 | G 7 | 685.3991 | 343.1032 | 499.2878 | 250.1474 | 6 | Y 6 | 438.3777 | 314.8933 | 888.3599 | 399.8816 | 7 | V 5 | 527.3300 | 264.1686 | 695.4087 | 348.2090 | 8 | P 4 | 428.2616 | 214.6344 | 794.4771 | 397.7422 | 9 | V 3 | 331.2088 | 186.1081 | 851.4885 | 426.2829 | 10 | G 2 | 232.1494 | 116.5738 |  |  | 11 | K 1 | 175.1190 | 89.0631 |
|----------------------------------------------------------------------------------------------------------------------------------------------------------------------------------------------------------------------------------------------------------------------------------------------------------------------------------------------------------------------------------------------------------------------------------------------------------------------------------------------------------------------------------------------------------------------------------------------------------------------------------------------------------------------------------------------------------------------------------------------------------------------------------------------------------------------------------------------------------------------------------------------------------------------------------------------------------------------------------------------------------------------------------------------------------------------------------------------------------------------------------------------------------------------------------------------------------------------------------------------------------------------------|-----------------------------------------------------------------------------------------------------------------------------------------------------------------------------------------------------------------|--------------------------------------------------------------------------------------------------------------------------------------------------------------------------------------------------------------------------------------------------------------------------------------------------------------------------------------------------------------------------------------------------------------------------------------------------------------------------------------------------------------------------------------------------------------------------------------------------------------------------------------------------------------------------------------------------------------------------------------------------------------------------------------------------------------------------------------------------------------------------------------------------------------------------------------------------------------------------------------------------------------------------------------------------------------------------------------------------------------------------------------------------------------------------------------------------------------------------------------------------------------------------------------------------------------------------------------------------------------------------------------------------------------------------------------------|-------|----------|----------|-------|----|-----|----------|---------|---|------|--|--|----------|---------|---|------|----------|----------|----------|----------|---|-----|----------|----------|----------|----------|---|-----|----------|----------|----------|----------|---|-----|----------|----------|----------|----------|---|-----|----------|----------|----------|----------|---|-----|----------|----------|----------|----------|---|-----|----------|----------|----------|----------|---|-----|----------|----------|----------|----------|----|-----|----------|----------|--|--|----|-----|----------|---------|
| b+                                                                                                                                                                                                                                                                                                                                                                                                                                                                                                                                                                                                                                                                                                                                                                                                                                                                                                                                                                                                                                                                                                                                                                                                                                                                         | b2+                                                                                                                                                                                                             | #                                                                                                                                                                                                                                                                                                                                                                                                                                                                                                                                                                                                                                                                                                                                                                                                                                                                                                                                                                                                                                                                                                                                                                                                                                                                                                                                                                                                                                          | Seq # | y+       | y2+      |       |    |     |          |         |   |      |  |  |          |         |   |      |          |          |          |          |   |     |          |          |          |          |   |     |          |          |          |          |   |     |          |          |          |          |   |     |          |          |          |          |   |     |          |          |          |          |   |     |          |          |          |          |   |     |          |          |          |          |    |     |          |          |  |  |    |     |          |         |
| 114.0913                                                                                                                                                                                                                                                                                                                                                                                                                                                                                                                                                                                                                                                                                                                                                                                                                                                                                                                                                                                                                                                                                                                                                                                                                                                                   | 57.5493                                                                                                                                                                                                         | 1                                                                                                                                                                                                                                                                                                                                                                                                                                                                                                                                                                                                                                                                                                                                                                                                                                                                                                                                                                                                                                                                                                                                                                                                                                                                                                                                                                                                                                          | I 11  |          |          |       |    |     |          |         |   |      |  |  |          |         |   |      |          |          |          |          |   |     |          |          |          |          |   |     |          |          |          |          |   |     |          |          |          |          |   |     |          |          |          |          |   |     |          |          |          |          |   |     |          |          |          |          |   |     |          |          |          |          |    |     |          |          |  |  |    |     |          |         |
| 171.1128                                                                                                                                                                                                                                                                                                                                                                                                                                                                                                                                                                                                                                                                                                                                                                                                                                                                                                                                                                                                                                                                                                                                                                                                                                                                   | 86.0600                                                                                                                                                                                                         | 2                                                                                                                                                                                                                                                                                                                                                                                                                                                                                                                                                                                                                                                                                                                                                                                                                                                                                                                                                                                                                                                                                                                                                                                                                                                                                                                                                                                                                                          | G 10  | 912.9283 | 888.7887 |       |    |     |          |         |   |      |  |  |          |         |   |      |          |          |          |          |   |     |          |          |          |          |   |     |          |          |          |          |   |     |          |          |          |          |   |     |          |          |          |          |   |     |          |          |          |          |   |     |          |          |          |          |   |     |          |          |          |          |    |     |          |          |  |  |    |     |          |         |
| 238.1343                                                                                                                                                                                                                                                                                                                                                                                                                                                                                                                                                                                                                                                                                                                                                                                                                                                                                                                                                                                                                                                                                                                                                                                                                                                                   | 114.5708                                                                                                                                                                                                        | 3                                                                                                                                                                                                                                                                                                                                                                                                                                                                                                                                                                                                                                                                                                                                                                                                                                                                                                                                                                                                                                                                                                                                                                                                                                                                                                                                                                                                                                          | G 8   | 895.5047 | 438.3580 |       |    |     |          |         |   |      |  |  |          |         |   |      |          |          |          |          |   |     |          |          |          |          |   |     |          |          |          |          |   |     |          |          |          |          |   |     |          |          |          |          |   |     |          |          |          |          |   |     |          |          |          |          |   |     |          |          |          |          |    |     |          |          |  |  |    |     |          |         |
| 341.2183                                                                                                                                                                                                                                                                                                                                                                                                                                                                                                                                                                                                                                                                                                                                                                                                                                                                                                                                                                                                                                                                                                                                                                                                                                                                   | 171.1128                                                                                                                                                                                                        | 4                                                                                                                                                                                                                                                                                                                                                                                                                                                                                                                                                                                                                                                                                                                                                                                                                                                                                                                                                                                                                                                                                                                                                                                                                                                                                                                                                                                                                                          | I 8   | 798.4832 | 399.7883 |       |    |     |          |         |   |      |  |  |          |         |   |      |          |          |          |          |   |     |          |          |          |          |   |     |          |          |          |          |   |     |          |          |          |          |   |     |          |          |          |          |   |     |          |          |          |          |   |     |          |          |          |          |   |     |          |          |          |          |    |     |          |          |  |  |    |     |          |         |
| 398.2398                                                                                                                                                                                                                                                                                                                                                                                                                                                                                                                                                                                                                                                                                                                                                                                                                                                                                                                                                                                                                                                                                                                                                                                                                                                                   | 199.6233                                                                                                                                                                                                        | 5                                                                                                                                                                                                                                                                                                                                                                                                                                                                                                                                                                                                                                                                                                                                                                                                                                                                                                                                                                                                                                                                                                                                                                                                                                                                                                                                                                                                                                          | G 7   | 685.3991 | 343.1032 |       |    |     |          |         |   |      |  |  |          |         |   |      |          |          |          |          |   |     |          |          |          |          |   |     |          |          |          |          |   |     |          |          |          |          |   |     |          |          |          |          |   |     |          |          |          |          |   |     |          |          |          |          |   |     |          |          |          |          |    |     |          |          |  |  |    |     |          |         |
| 499.2878                                                                                                                                                                                                                                                                                                                                                                                                                                                                                                                                                                                                                                                                                                                                                                                                                                                                                                                                                                                                                                                                                                                                                                                                                                                                   | 250.1474                                                                                                                                                                                                        | 6                                                                                                                                                                                                                                                                                                                                                                                                                                                                                                                                                                                                                                                                                                                                                                                                                                                                                                                                                                                                                                                                                                                                                                                                                                                                                                                                                                                                                                          | Y 6   | 438.3777 | 314.8933 |       |    |     |          |         |   |      |  |  |          |         |   |      |          |          |          |          |   |     |          |          |          |          |   |     |          |          |          |          |   |     |          |          |          |          |   |     |          |          |          |          |   |     |          |          |          |          |   |     |          |          |          |          |   |     |          |          |          |          |    |     |          |          |  |  |    |     |          |         |
| 888.3599                                                                                                                                                                                                                                                                                                                                                                                                                                                                                                                                                                                                                                                                                                                                                                                                                                                                                                                                                                                                                                                                                                                                                                                                                                                                   | 399.8816                                                                                                                                                                                                        | 7                                                                                                                                                                                                                                                                                                                                                                                                                                                                                                                                                                                                                                                                                                                                                                                                                                                                                                                                                                                                                                                                                                                                                                                                                                                                                                                                                                                                                                          | V 5   | 527.3300 | 264.1686 |       |    |     |          |         |   |      |  |  |          |         |   |      |          |          |          |          |   |     |          |          |          |          |   |     |          |          |          |          |   |     |          |          |          |          |   |     |          |          |          |          |   |     |          |          |          |          |   |     |          |          |          |          |   |     |          |          |          |          |    |     |          |          |  |  |    |     |          |         |
| 695.4087                                                                                                                                                                                                                                                                                                                                                                                                                                                                                                                                                                                                                                                                                                                                                                                                                                                                                                                                                                                                                                                                                                                                                                                                                                                                   | 348.2090                                                                                                                                                                                                        | 8                                                                                                                                                                                                                                                                                                                                                                                                                                                                                                                                                                                                                                                                                                                                                                                                                                                                                                                                                                                                                                                                                                                                                                                                                                                                                                                                                                                                                                          | P 4   | 428.2616 | 214.6344 |       |    |     |          |         |   |      |  |  |          |         |   |      |          |          |          |          |   |     |          |          |          |          |   |     |          |          |          |          |   |     |          |          |          |          |   |     |          |          |          |          |   |     |          |          |          |          |   |     |          |          |          |          |   |     |          |          |          |          |    |     |          |          |  |  |    |     |          |         |
| 794.4771                                                                                                                                                                                                                                                                                                                                                                                                                                                                                                                                                                                                                                                                                                                                                                                                                                                                                                                                                                                                                                                                                                                                                                                                                                                                   | 397.7422                                                                                                                                                                                                        | 9                                                                                                                                                                                                                                                                                                                                                                                                                                                                                                                                                                                                                                                                                                                                                                                                                                                                                                                                                                                                                                                                                                                                                                                                                                                                                                                                                                                                                                          | V 3   | 331.2088 | 186.1081 |       |    |     |          |         |   |      |  |  |          |         |   |      |          |          |          |          |   |     |          |          |          |          |   |     |          |          |          |          |   |     |          |          |          |          |   |     |          |          |          |          |   |     |          |          |          |          |   |     |          |          |          |          |   |     |          |          |          |          |    |     |          |          |  |  |    |     |          |         |
| 851.4885                                                                                                                                                                                                                                                                                                                                                                                                                                                                                                                                                                                                                                                                                                                                                                                                                                                                                                                                                                                                                                                                                                                                                                                                                                                                   | 426.2829                                                                                                                                                                                                        | 10                                                                                                                                                                                                                                                                                                                                                                                                                                                                                                                                                                                                                                                                                                                                                                                                                                                                                                                                                                                                                                                                                                                                                                                                                                                                                                                                                                                                                                         | G 2   | 232.1494 | 116.5738 |       |    |     |          |         |   |      |  |  |          |         |   |      |          |          |          |          |   |     |          |          |          |          |   |     |          |          |          |          |   |     |          |          |          |          |   |     |          |          |          |          |   |     |          |          |          |          |   |     |          |          |          |          |   |     |          |          |          |          |    |     |          |          |  |  |    |     |          |         |
|                                                                                                                                                                                                                                                                                                                                                                                                                                                                                                                                                                                                                                                                                                                                                                                                                                                                                                                                                                                                                                                                                                                                                                                                                                                                            |                                                                                                                                                                                                                 | 11                                                                                                                                                                                                                                                                                                                                                                                                                                                                                                                                                                                                                                                                                                                                                                                                                                                                                                                                                                                                                                                                                                                                                                                                                                                                                                                                                                                                                                         | K 1   | 175.1190 | 89.0631  |       |    |     |          |         |   |      |  |  |          |         |   |      |          |          |          |          |   |     |          |          |          |          |   |     |          |          |          |          |   |     |          |          |          |          |   |     |          |          |          |          |   |     |          |          |          |          |   |     |          |          |          |          |   |     |          |          |          |          |    |     |          |          |  |  |    |     |          |         |

| Protein Probab. | Protein                                                                                                                     | Tot. Peptides | Unique Peptides | Best Gene Name                                                                           | Scan # | Charge | Delta Mass | Peptide Prophet Score | Peptide Sequence |
|-----------------|-----------------------------------------------------------------------------------------------------------------------------|---------------|-----------------|------------------------------------------------------------------------------------------|--------|--------|------------|-----------------------|------------------|
| 0,9718          | IPI00402184,<br>IPI00910614,<br>IPI00856037,<br>IPI00402183,<br>IPI00402182,<br>IPI00018140,<br>IPI00012074,<br>IPI00644055 | 1             | 1               | SYNCRIP,<br>HNRNPR,<br>HNRNPR,<br>RP1-3J17.2,<br>SYNCRIP,<br>SYNCRIP,<br>HNRPR,<br>HNRPR | 1995   | 2+     | -0,0182    | 0,9986                | R.TGYTLDVTTGQR.K |

### Peptide Details

#### SHOW MODIFICATIONS

|              |           |                |         |          |                                                                                      |
|--------------|-----------|----------------|---------|----------|--------------------------------------------------------------------------------------|
| Scan         | 1995      | Delta Mass     | -0.0182 | Protein  | IPI00012074                                                                          |
| Mass         | 1311.6540 | Next           | 291.000 | Fraction | VF_T13H_band03.mzXML                                                                 |
| Hyper        | 433.000   | PeptideProphet | 1.00    | Run      | VF_T13H_band03.pep.xml (Vitor/VF_T13H_band03 (VF_SILAC_AssimWindow_NewPL_4da_Human)) |
| Protein Hits | 8         | Ion Percent    | 77%     |          |                                                                                      |
| Charge       | 2+        | B              | 1.000   |          |                                                                                      |

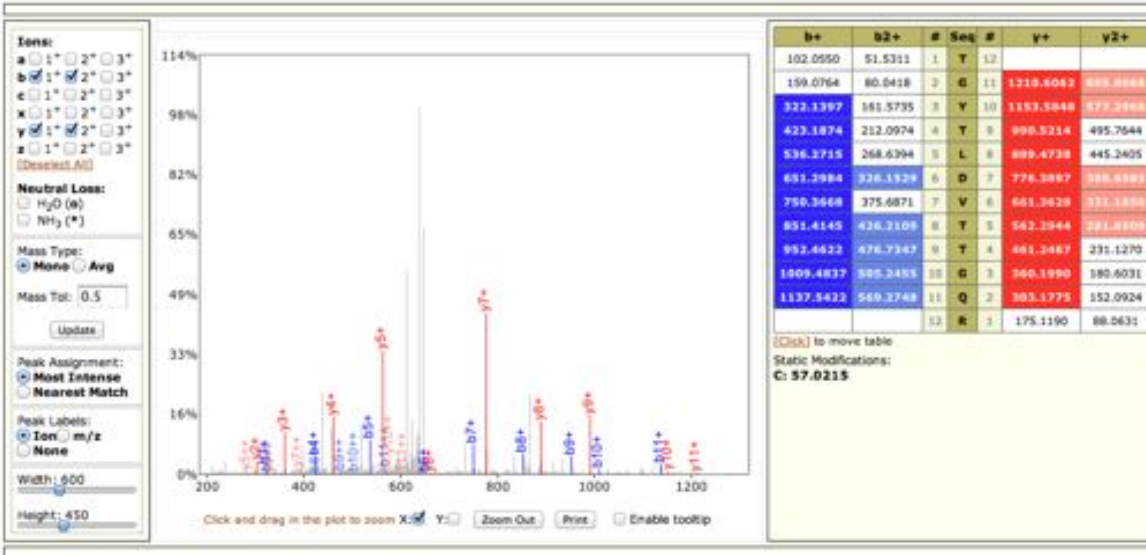

| Protein Probab. | Protein                                     | Tot. Peptides | Unique Peptides | Best Gene Name                     | Scan# | Charge | Delta Mass | Peptide Prophet Score | Peptide Sequence  |
|-----------------|---------------------------------------------|---------------|-----------------|------------------------------------|-------|--------|------------|-----------------------|-------------------|
| 0,9234          | IPI00217465,<br>IPI00217467,<br>IPI00217466 | 1             | 1               | HIST1H1C,<br>HIST1H1E,<br>HIST1H1D | 2003  | 2+     | +0,9852    | 0,9963                | R.KASGPPVSELITK.A |

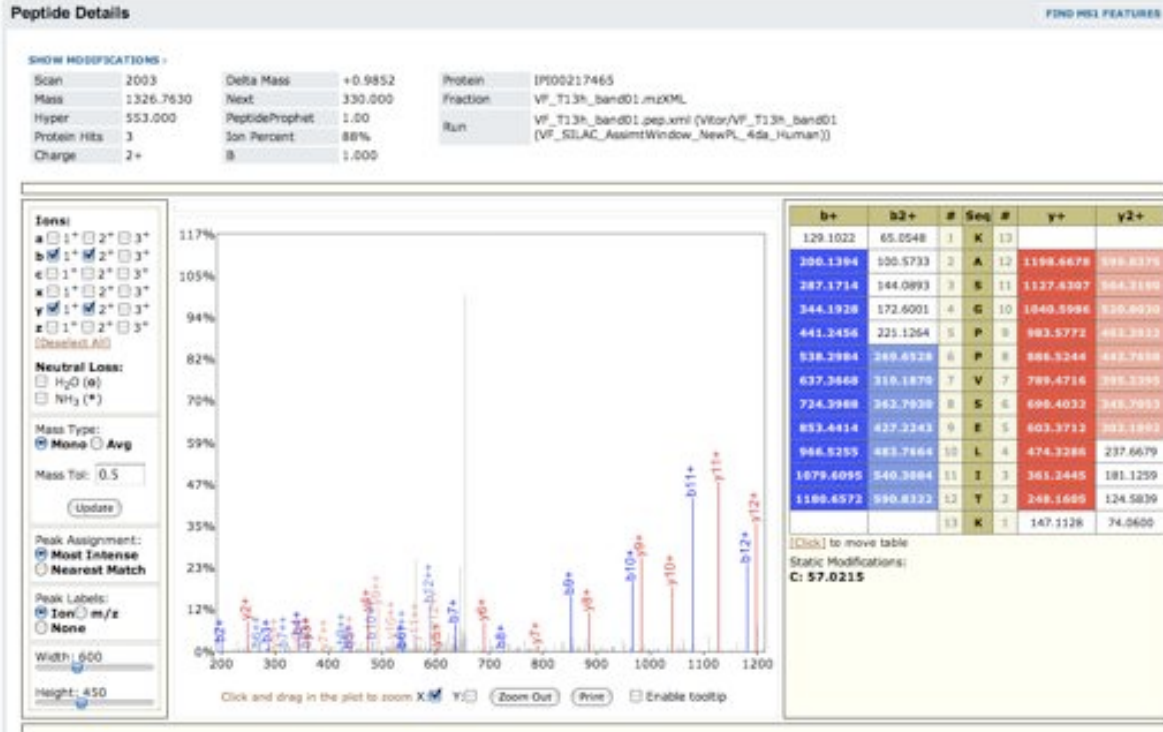

| Protein Probab. | Protein                                                                                                                                     | Tot. Peptides | Unique Peptides | Best Gene Name                                                            | Scan # | Charge | Delta Mass | Peptide Prophet Score | Peptide Sequence    |
|-----------------|---------------------------------------------------------------------------------------------------------------------------------------------|---------------|-----------------|---------------------------------------------------------------------------|--------|--------|------------|-----------------------|---------------------|
| 0,9869          | IPI00514204,<br>IPI00655812,<br>IPI00514817,<br>IPI00514320,<br>IPI00216952,<br>IPI00910241,<br>IPI00644087,<br>IPI00216953,<br>IPI00021405 | 1             | 1               | LMNA,<br>LMNA,<br>LMNA,<br>LMNA,<br>LMNA,<br>-,<br>LMNA,<br>LMNA,<br>LMNA | 2024   | 2+     | -0,0226    | 0,9999                | R.NSNLVGAAHEELQQR.I |

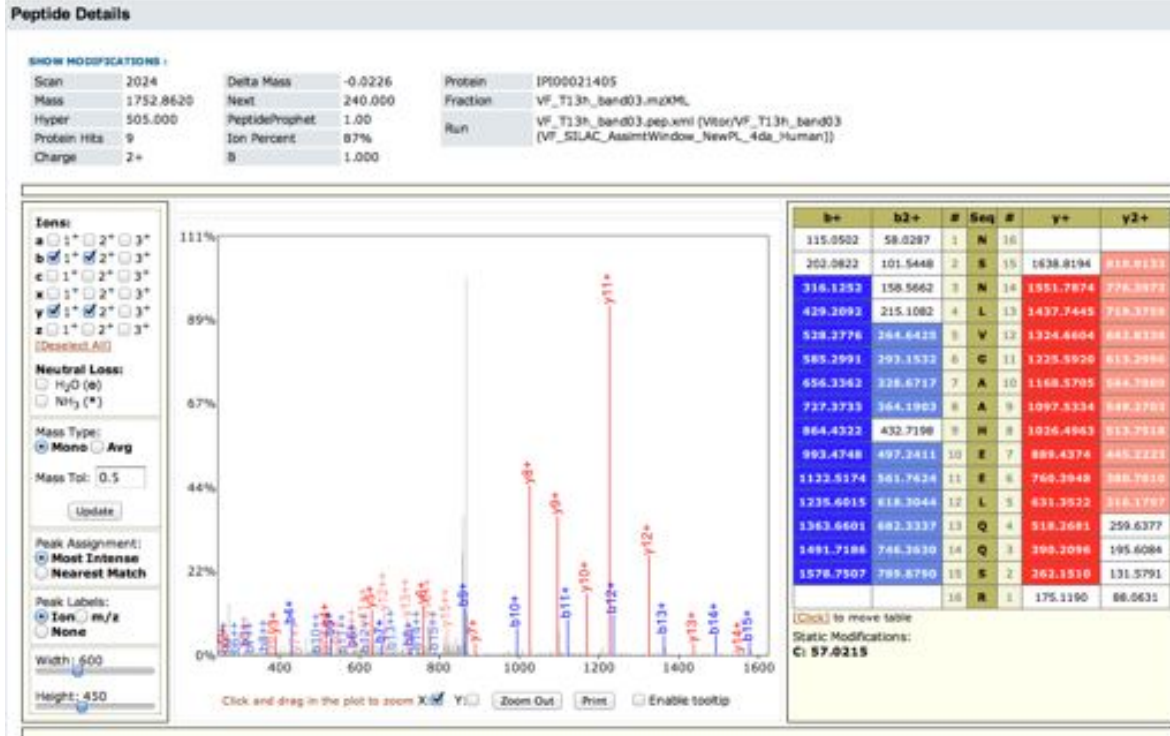

| Protein Probab. | Protein                     | Tot. Peptides | Unique Peptides | Best Gene Name | Scan # | Charge | Delta Mass | Peptide Prophet Score | Peptide Sequence     |
|-----------------|-----------------------------|---------------|-----------------|----------------|--------|--------|------------|-----------------------|----------------------|
| 0,9881          | IPI00182138,<br>IPI00296713 | 1             | 1               | GRN,<br>GRN    | 2026   | 2+     | -0,0262    | 0,9999                | R.VHCCPHGAFCDLVHTR.C |

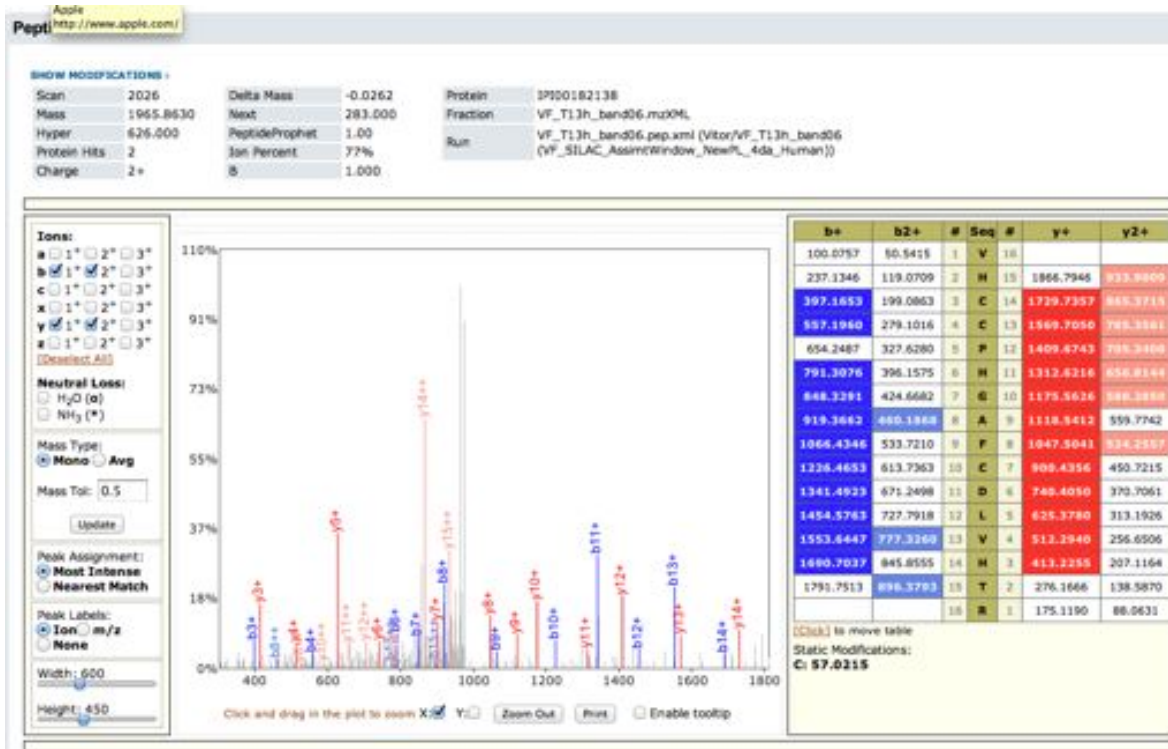



| Protein Probab. | Protein     | Tot. Peptides | Unique Peptides | Best Gene Name | Scan # | Charge | Delta Mass | Peptide Prophet Score | Peptide Sequence    |
|-----------------|-------------|---------------|-----------------|----------------|--------|--------|------------|-----------------------|---------------------|
| 0,9801          | IPI00017592 | 1             | 1               | LETM1          | 2029   | 2+     | -0,0232    | 0,9999                | K.LEATLQEEAAIQEHR.E |

### Peptide Details

#### SHOW MODIFICATIONS -

|              |           |                |         |          |                                                                                     |
|--------------|-----------|----------------|---------|----------|-------------------------------------------------------------------------------------|
| Scan         | 2029      | Delta Mass     | -0.0232 | Protein  | IPI00017592                                                                         |
| Mass         | 1865.9350 | Next           | 259.500 | Fraction | VF_T13H_band02.mzXML                                                                |
| Hyper        | 492.000   | PeptideProphet | 1.00    | Run      | VF_T13H_band02.pep.xml (Vitor/VF_T13H_band02 (VF_SILAC_AssimWindow_NewP_48a_Human)) |
| Protein Hits | 1         | Ion Percent    | 90%     |          |                                                                                     |
| Charge       | 2+        | B              | 1.500   |          |                                                                                     |

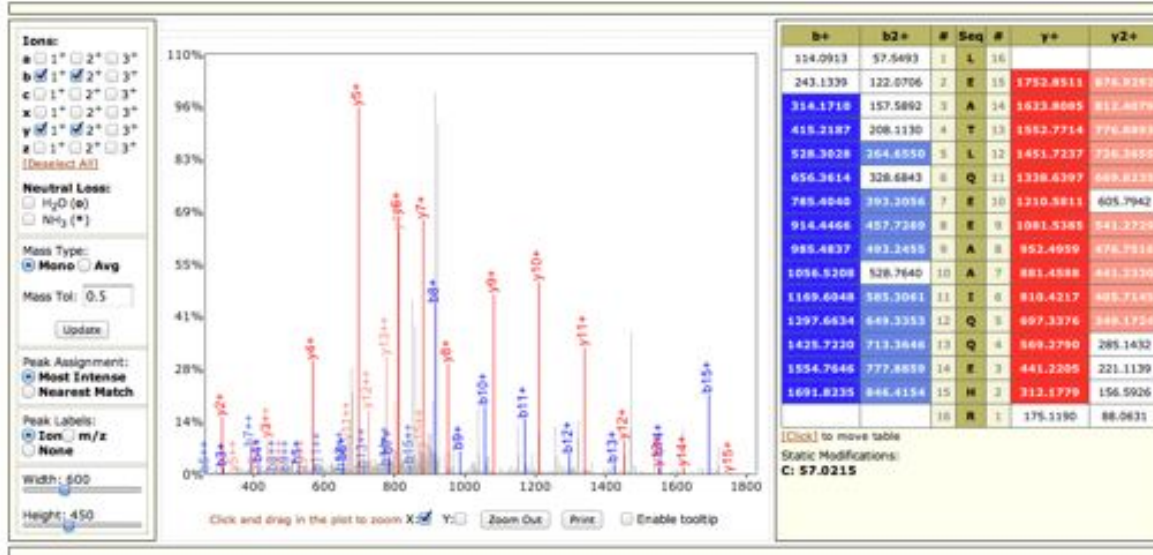

| Protein Probab. | Protein     | Tot. Peptides | Unique Peptides | Best Gene Name | Scan # | Charge | Delta Mass | Peptide Prophet Score | Peptide Sequence    |
|-----------------|-------------|---------------|-----------------|----------------|--------|--------|------------|-----------------------|---------------------|
| 0,9578          | IPI00217468 | 1             | 1               | HIST1H1B       | 2041   | 2+     | -0,0168    | 0,9985                | R.K'ATGPPVSELITK'.A |

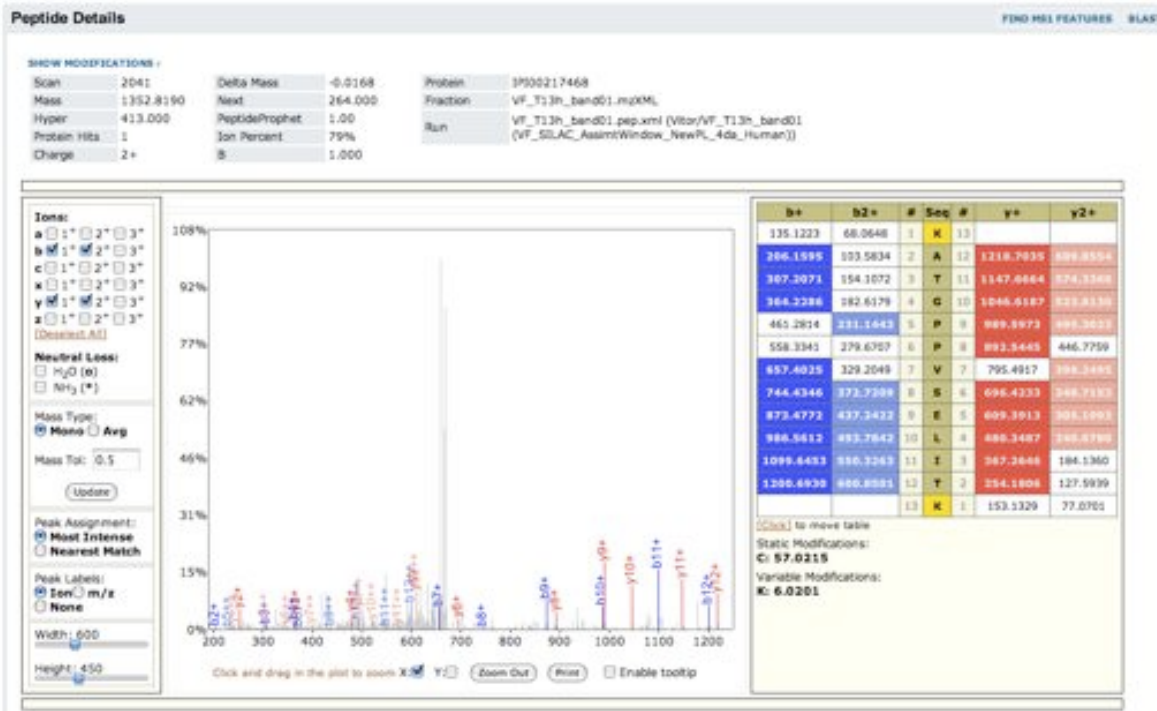

| Protein Probab. | Protein                     | Tot. Peptides | Unique Peptides | Best Gene Name    | Scan # | Charge | Delta Mass | Peptide Prophet Score | Peptide Sequence |
|-----------------|-----------------------------|---------------|-----------------|-------------------|--------|--------|------------|-----------------------|------------------|
| 0,9785          | IPI00026167,<br>IPI00893746 | 1             | 1               | NHP2L1,<br>NHP2L1 | 2047   | 2+     | -0,0185    | 0,9990                | K.QQIQSIQQSIER.L |

### Peptide Details

#### SHOW MODIFICATIONS -

|              |           |                |         |          |                                                                                         |
|--------------|-----------|----------------|---------|----------|-----------------------------------------------------------------------------------------|
| Scan         | 2047      | Delta Mass     | -0.0185 | Protein  | IPI00026167                                                                             |
| Mass         | 1457.7710 | Next           | 315.600 | Fraction | VF_T13h_band06.mzML                                                                     |
| Hyper        | 485.000   | PeptideProphet | 1.00    | Run      | VF_T13h_band06.pep.xml (Vitor/VF_T13h_band06<br>[VF_SILAC_AssmtWindow_NewPL_4da_Human]) |
| Protein Hits | 2         | Ion Percent    | 86%     |          |                                                                                         |
| Charge       | 2+        | B              | 1.000   |          |                                                                                         |

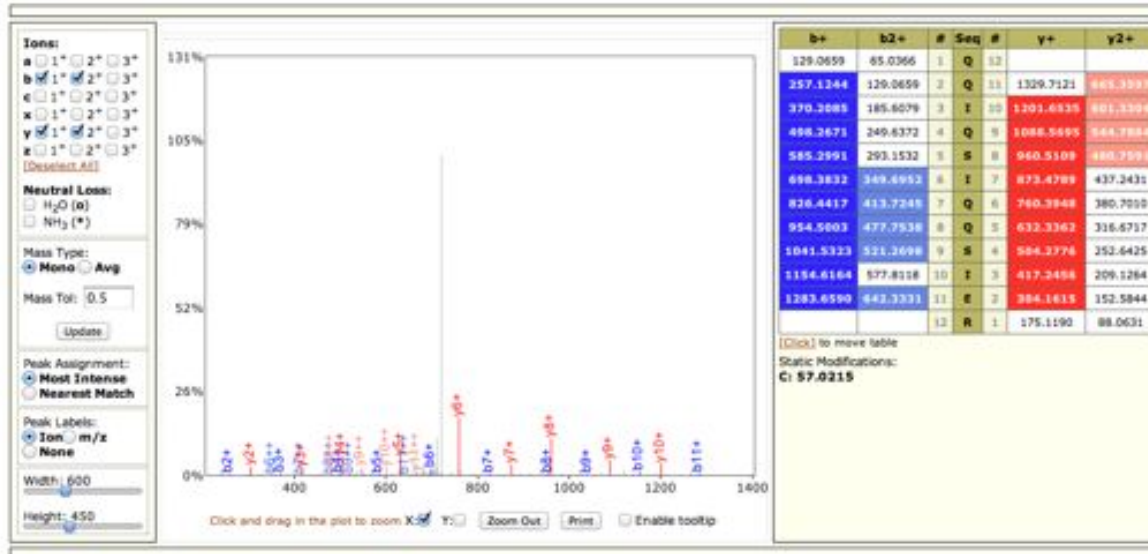

| Protein Probab. | Protein                                     | Tot. Peptides | Unique Peptides | Best Gene Name               | Scan # | Charge | Delta Mass | Peptide Prophet Score | Peptide Sequence |
|-----------------|---------------------------------------------|---------------|-----------------|------------------------------|--------|--------|------------|-----------------------|------------------|
| 0,9869          | IP100514217,<br>IP100217232,<br>IP100464979 | 1             | 1               | SUCLA2,<br>SUCLA2,<br>SUCLA2 | 2048   | 2+     | -0,0173    | 0,9999                | K.ILCDDLDEAAR.M  |

### Peptide Details

#### SHOW MODIFICATIONS

|              |           |                 |         |          |                                                                                        |
|--------------|-----------|-----------------|---------|----------|----------------------------------------------------------------------------------------|
| Scan         | 2048      | Delta Mass      | -0.0173 | Protein  | IP100217232                                                                            |
| Mass         | 1361.6370 | Next            | 310.000 | Fraction | VF_T13h_band03.mzXML                                                                   |
| Hyper        | 543.000   | Peptide/Prophet | 1.00    | Run      | VF_T13h_band03.pep.xml (vitor/VF_T13h_band03<br>(VF_SILAC_AssimWindow_NewR_4da_Human)) |
| Protein Hits | 3         | Ion Percent     | 86%     |          |                                                                                        |
| Charge       | 2+        | B               | 1.000   |          |                                                                                        |

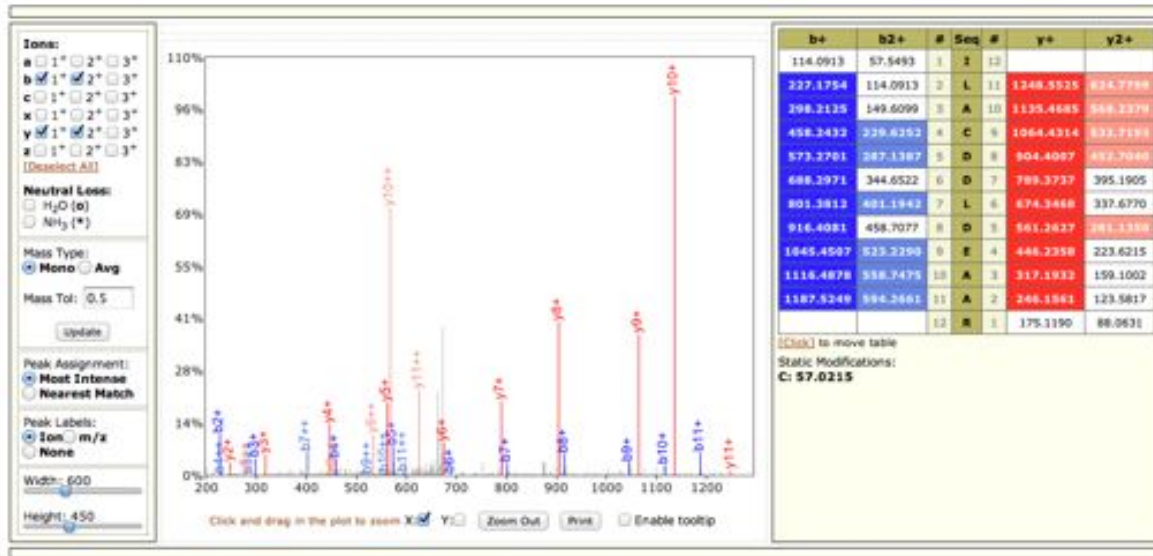



| Protein Probab. | Protein                  | Tot. Peptides | Unique Peptides | Best Gene Name | Scan # | Charge | Delta Mass | Peptide Prophet Score | Peptide Sequence |
|-----------------|--------------------------|---------------|-----------------|----------------|--------|--------|------------|-----------------------|------------------|
| 0,9524          | IPI00026167, IPI00893746 | 1             | 1               | NHP2L1, NHP2L1 | 2062   | 2+     | -0,0146    | 0,9970                | K.QQIQSIQQSIER.L |

### Peptide Details

#### SHOW MODIFICATIONS

|              |           |                |         |          |                                                                                       |
|--------------|-----------|----------------|---------|----------|---------------------------------------------------------------------------------------|
| Scan         | 2062      | Delta Mass     | -0.0146 | Protein  | IPI00026167                                                                           |
| Mass         | 1457.7710 | Next           | 265.000 | Fraction | VF_T13h_band05.mzXML                                                                  |
| Hyper        | 382.000   | PeptideProphet | 1.00    | Run      | VF_T13h_band05.pep.xml (Vitor/VF_T13h_band05 (VF_SILAC_AssimtWindow_NewPL_4da_Human)) |
| Protein Hits | 2         | Ion Percent    | 91%     |          |                                                                                       |
| Charge       | 2+        | B              | 1.000   |          |                                                                                       |

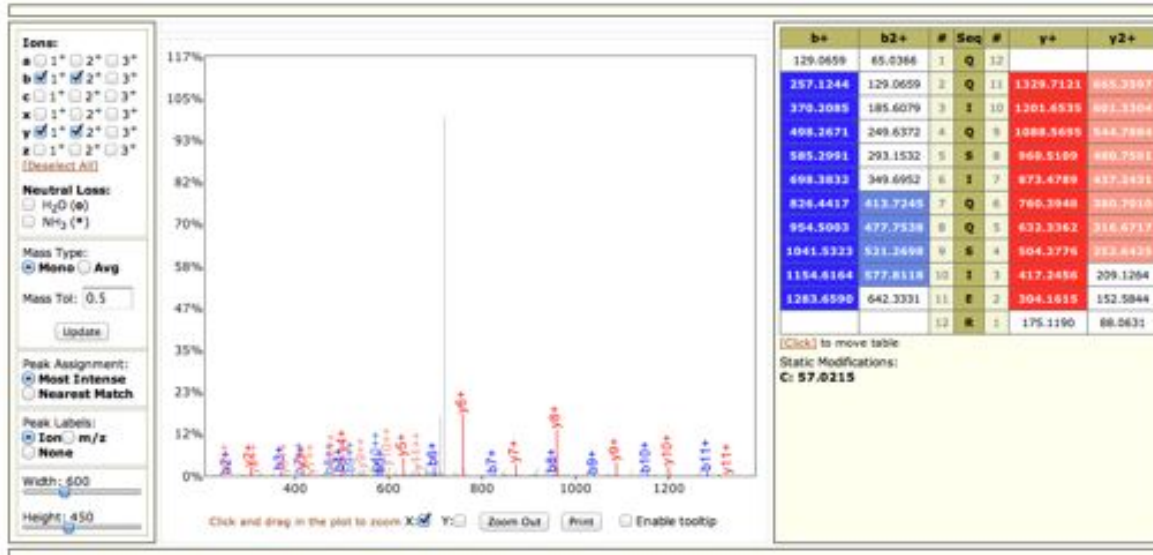

| Protein Probab. | Protein                                     | Tot. Peptides | Unique Peptides | Best Gene Name               | Scan# | Charge | Delta Mass | Peptide Prophet Score | Peptide Sequence |
|-----------------|---------------------------------------------|---------------|-----------------|------------------------------|-------|--------|------------|-----------------------|------------------|
| 0,9817          | IPI00167433,<br>IPI00894257,<br>IPI00440693 | 1             | 1               | FDX1L,<br>MGC19604,<br>FDX1L | 2066  | 2+     | -0,0142    | 0,9993                | R.VGDNVLHLAQR.H  |

### Peptide Details

#### SHOW MODIFICATIONS

|              |           |                |         |          |                                                                                      |
|--------------|-----------|----------------|---------|----------|--------------------------------------------------------------------------------------|
| Scan         | 2066      | Delta Mass     | -0.0142 | Protein  | IPI00167433                                                                          |
| Mass         | 1221.6700 | Next           | 310.000 | Fraction | VF_T13h_band06.muxML                                                                 |
| Hyper        | 499.000   | PeptideProphet | 1.00    | Run      | VF_T13h_band06.pep.xml (Vitor/VF_T13h_band06 (VF_SILAC_AssmtWindow_NewPL_4da_Human)) |
| Protein Hits | 3         | Ion Percent    | 90%     |          |                                                                                      |
| Charge       | 2+        | B              | 1.000   |          |                                                                                      |

- Ions:**
- 1\*  2\*  3\*
  - b 1\*  2\*  3\*
  - e 1\*  2\*  3\*
  - x 1\*  2\*  3\*
  - y 1\*  2\*  3\*
  - z 1\*  2\*  3\*
- [\[Deselect All\]](#)

- Neutral Loss:**
- H<sub>2</sub>O (0)
  - NH<sub>3</sub> (\*)

Mass Type:  
 Mono  Avg

Mass Tol: 0.5

[Update](#)

- Peak Assignment:**
- Most Intense
  - Nearest Match

- Peak Labels:**
- Ion, m/z
  - None

Width: 600

Height: 450

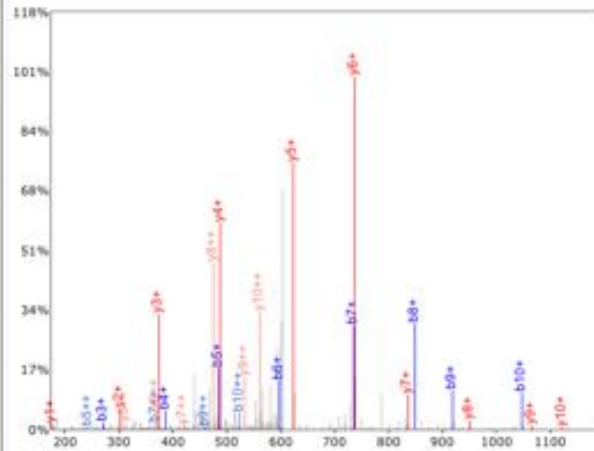

Click and drag in the plot to zoom X:  Y:  [Zoom Out](#) [Print](#)  Enable tooltip

| b+        | b2+      | #  | Seq # | y+        | y2+      |
|-----------|----------|----|-------|-----------|----------|
| 100.0757  | 50.5415  | 1  | V 11  |           |          |
| 157.0972  | 79.0522  | 2  | G 10  | 1122.6014 | 381.8044 |
| 272.1241  | 136.5657 | 3  | D 9   | 1045.5800 | 333.2836 |
| 386.1670  | 193.5872 | 4  | N 8   | 950.5530  | 475.7842 |
| 485.2354  | 243.1214 | 5  | V 7   | 834.5101  | 618.7507 |
| 598.3195  | 299.6634 | 6  | L 6   | 737.4417  | 368.3345 |
| 725.3784  | 368.1928 | 7  | H 5   | 634.3576  | 312.6834 |
| 848.4628  | 424.7349 | 8  | L 4   | 487.2987  | 244.3530 |
| 919.4996  | 460.2534 | 9  | A 3   | 374.2146  | 187.6310 |
| 1047.5581 | 524.2817 | 10 | Q 2   | 303.1775  | 152.0624 |
|           |          | 11 | R 1   | 175.1100  | 88.0631  |

[\[Click\]](#) to move table

Static Modifications:

C: 57.0215

| Protein Probab. | Protein                                     | Tot. Peptides | Unique Peptides | Best Gene Name      | Scan # | Charge | Delta Mass | Peptide Prophet Score | Peptide Sequence     |
|-----------------|---------------------------------------------|---------------|-----------------|---------------------|--------|--------|------------|-----------------------|----------------------|
| 0,9865          | IPI00384659,<br>IPI00071334,<br>IPI00555748 | 1             | 1               | -,<br>ND3,<br>NADH3 | 2079   | 2+     | -0,0193    | 0,9999                | K.STPYECGFDPM"SPAR.V |

### Peptide Details

| Peptide Details |           | Show mousecur/30MS |         | Protein  |                                                                                      |
|-----------------|-----------|--------------------|---------|----------|--------------------------------------------------------------------------------------|
| Scan            | 2079      | Delta Mass         | -0.0193 | Protein  | IP00071334                                                                           |
| Mass            | 1730.7150 | Next               | 387.000 | Fraction | VF_T13h_band05.mzXML                                                                 |
| Hyper           | 633.000   | PeptideProphet     | 1.00    | Run      | VF_T13h_band05.pep.xml (Vitor/VF_T13h_band05 (VF_SILAC_AssmtWindow_NewPt_eda_Human)) |
| Protein Hits    | 3         | Ion Percent        | 82%     |          |                                                                                      |
| Charge          | 2+        | B                  | 1.000   |          |                                                                                      |

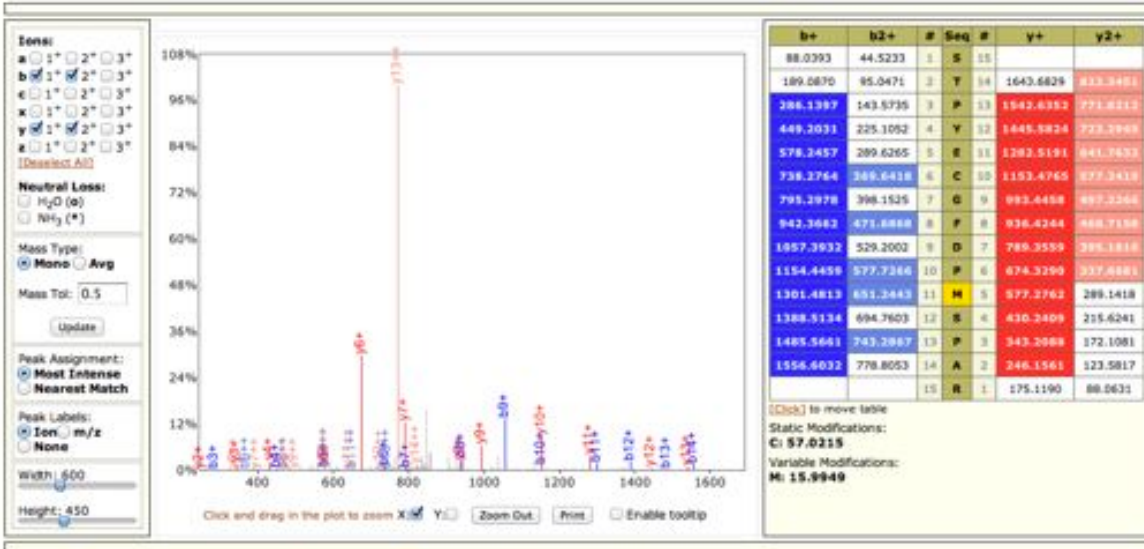

| b+        | b2+      | #  | Seq # | y+ | y2+       |
|-----------|----------|----|-------|----|-----------|
| 88.0393   | 44.5233  | 1  | S     | 15 |           |
| 189.0870  | 85.0471  | 2  | Y     | 14 | 1643.6828 |
| 286.1397  | 143.5735 | 3  | P     | 13 | 1642.6952 |
| 449.2031  | 225.1052 | 4  | Y     | 12 | 1445.5824 |
| 578.2457  | 289.6265 | 5  | E     | 11 | 1292.5191 |
| 738.2764  | 366.6418 | 6  | C     | 10 | 1153.4765 |
| 795.2978  | 398.1525 | 7  | G     | 9  | 893.4458  |
| 942.3682  | 471.6888 | 8  | F     | 8  | 938.4244  |
| 1057.3932 | 529.2002 | 9  | D     | 7  | 789.3559  |
| 1154.4459 | 577.2366 | 10 | P     | 6  | 678.3290  |
| 1301.4813 | 651.2443 | 11 | M     | 5  | 577.2762  |
| 1388.5134 | 694.7603 | 12 | S     | 4  | 430.3409  |
| 1485.5461 | 743.2867 | 13 | P     | 3  | 343.2688  |
| 1556.6032 | 778.8053 | 14 | A     | 2  | 246.1561  |
|           |          | 15 | R     | 1  | 175.1190  |

[Click] to move table  
 Static Modifications:  
 C: 57.0215  
 Variable Modifications:  
 M: 15.9949



| Protein Probab. | Protein                                                     | Tot. Peptides | Unique Peptides | Best Gene Name                     | Scan # | Charge | Delta Mass | Peptide Prophet Score | Peptide Sequence  |
|-----------------|-------------------------------------------------------------|---------------|-----------------|------------------------------------|--------|--------|------------|-----------------------|-------------------|
| 0,9817          | IPI00182933,<br>IPI00871858,<br>IPI00645474,<br>IPI00397860 | 1             | 1               | CYB5A,<br>CYB5A,<br>CYB5A,<br>CYB5 | 2089   | 2+     | -0,0173    | 0,9993                | K.FLEEHPGGEEVLR.E |

### Peptide Details

#### SHOW MODIFICATIONS -

|                 |                      |                                                   |
|-----------------|----------------------|---------------------------------------------------|
| Scan: 2089      | Delta Mass: -0.0173  | Protein: IPI00182933                              |
| Mass: 1511.7490 | Next: 316.000        | Fraction: VF_T13h_band06.mzXML                    |
| Hyper: 502.000  | PeptideProphet: 1.00 | Run: VF_T13h_band06.pep.xml (Vitor/VF_T13h_band06 |
| Protein Hits: 4 | Ion Percent: 83%     | (VF_SILAC_AssimtWindow_NewPI_4ds_Human)           |
| Charge: 2+      | B: 1.000             |                                                   |

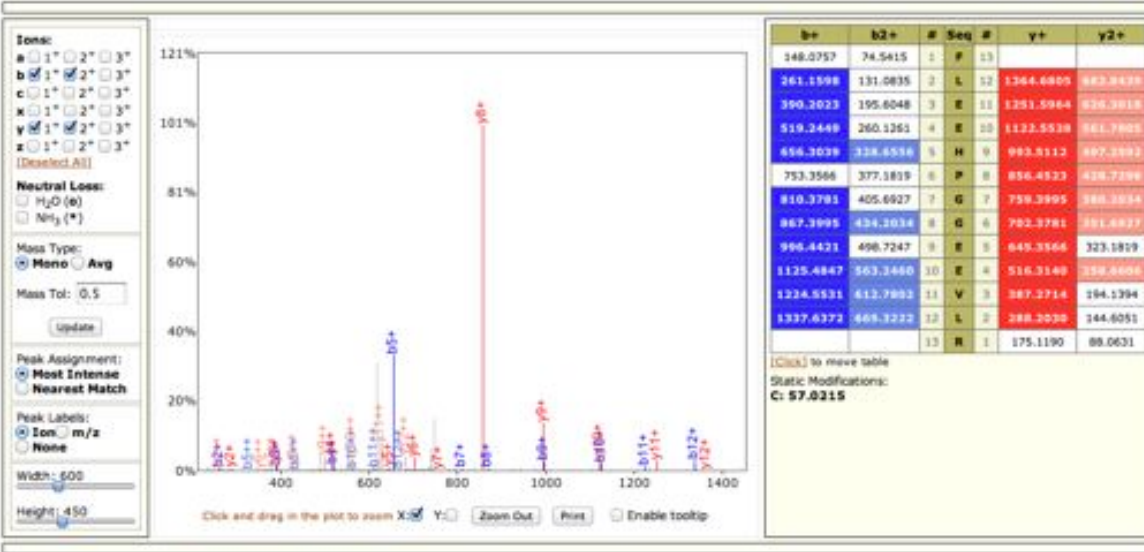

| Protein Probab. | Protein                                                     | Tot. Peptides | Unique Peptides | Best Gene Name              | Scan # | Charge | Delta Mass | Peptide Prophet Score | Peptide Sequence  |
|-----------------|-------------------------------------------------------------|---------------|-----------------|-----------------------------|--------|--------|------------|-----------------------|-------------------|
| 0,9798          | IPI00910941,<br>IPI00908389,<br>IPI00747497,<br>IPI00000875 | 1             | 1               | -,<br>-,<br>EEF1G,<br>EEF1G | 2102   | 2+     | -0,0166    | 0,9993                | K.ALIAAQYSGAQVR.V |

Peptide Details

<http://maps.google.com/>

SHOW MODIFICATIONS

|              |           |                 |         |          |                                                                                       |
|--------------|-----------|-----------------|---------|----------|---------------------------------------------------------------------------------------|
| Scan         | 2102      | Delta Mass      | -0.0166 | Protein  | IPI00000875                                                                           |
| Mass         | 1347.7360 | Next            | 260.000 | Fraction | VF_T13h_band03.mz0M                                                                   |
| Hyper        | 425.000   | Peptide/Prophet | 1.00    | Run      | VF_T13h_band03.pep.xml (Vitor/VF_T13h_band03 [VF_SILAC_AssimtWindow_NewPL_4da_Human]) |
| Protein Hits | 4         | Ion Percent     | 83%     |          |                                                                                       |
| Charge       | 2+        | B               | 1.000   |          |                                                                                       |

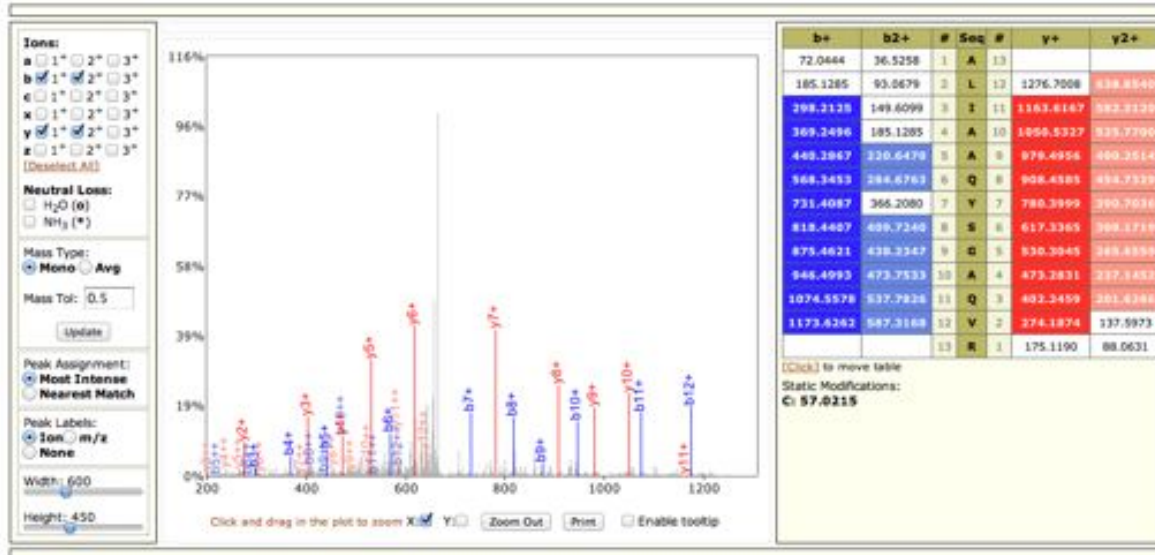

| Protein Probab. | Protein     | Tot. Peptides | Unique Peptides | Best Gene Name | Scan # | Charge | Delta Mass | Peptide Prophet Score | Peptide Sequence   |
|-----------------|-------------|---------------|-----------------|----------------|--------|--------|------------|-----------------------|--------------------|
| 0,8628          | IPI00009634 | 1             | 1               | SQRDL          | 2103   | 2+     | -0,0128    | 0,9880                | K.TAAVAQAQSGILDR.T |

### Peptide Details

#### SHOW MODIFICATIONS -

|              |           |                |         |          |                                                                                      |
|--------------|-----------|----------------|---------|----------|--------------------------------------------------------------------------------------|
| Scan         | 2103      | Delta Mass     | -0.0128 | Protein  | IPI00009634                                                                          |
| Mass         | 1343.7280 | Neut           | 258.000 | Fraction | VF_T13h_band03.mzXML                                                                 |
| Hyper        | 355.000   | PeptideProphet | 0.99    | Run      | VF_T13h_band03.pep.xml (Vitor/VF_T13h_band03 (VF_SILAC_Assay/Window_NewP_4ds_Human)) |
| Protein Hits | 1         | Ion Percent    | 73%     |          |                                                                                      |
| Charge       | 2+        | B              | 1.000   |          |                                                                                      |

#### Ions:

- 1\*  2\*  3\*  
 1\*  2\*  3\*  
 1\*  2\*  3\*  
 1\*  2\*  3\*  
 1\*  2\*  3\*  
 1\*  2\*  3\*  
 1\*  2\*  3\*

[Deselect All]

#### Neutral Loss:

- H<sub>2</sub>O (0)  
 NH<sub>3</sub> (\*)

#### Mass Type:

- Mono  Avg

Mass Tol: 0.5

[Update]

#### Peak Assignment:

- Most Intense  Nearest Match

#### Peak Labels:

- Ion  m/z  None

Width: 500

Height: 450

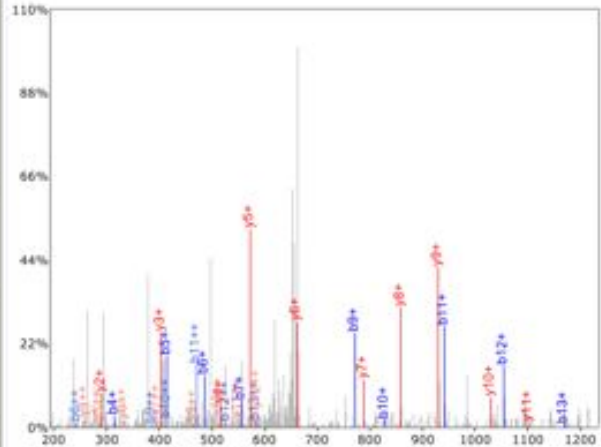

Click and drag in the plot to zoom X: [value] Y: [value] [Zoom Out] [Print] [Enable tooltip]

| b+        | b2+      | #  | Seq | #  | y+        | y2+      |
|-----------|----------|----|-----|----|-----------|----------|
| 102.0550  | 51.5311  | 1  | T   | 14 |           |          |
| 173.0921  | 87.0497  | 2  | A   | 13 | 1242.6801 | 621.8437 |
| 244.1292  | 122.5662 | 3  | A   | 12 | 1171.6430 | 386.3251 |
| 315.1663  | 158.0868 | 4  | A   | 11 | 1100.6058 | 358.8084 |
| 414.3347  | 207.6210 | 5  | V   | 10 | 1029.5687 | 815.3888 |
| 485.2718  | 243.1395 | 6  | A   | 9  | 930.5005  | 485.7938 |
| 556.3089  | 278.6581 | 7  | A   | 8  | 859.4632  | 430.2352 |
| 684.3675  | 342.6874 | 8  | Q   | 7  | 788.4261  | 384.7127 |
| 771.3995  | 386.2034 | 9  | S   | 6  | 660.3875  | 336.8874 |
| 828.4210  | 414.7141 | 10 | G   | 5  | 573.3355  | 287.1714 |
| 941.5051  | 471.2582 | 11 | I   | 4  | 514.3148  | 238.6686 |
| 1054.5891 | 527.7982 | 12 | L   | 3  | 403.2300  | 202.3386 |
| 1169.6161 | 585.3117 | 13 | D   | 2  | 290.1459  | 145.5766 |
|           |          | 14 | R   | 1  | 175.1190  | 88.0631  |

[Click] to move table

Static Modifications:

C: 57.0215

| Protein Probab. | Protein                     | Tot. Peptides | Unique Peptides | Best Gene Name  | Scan # | Charge | Delta Mass | Peptide Prophet Score | Peptide Sequence |
|-----------------|-----------------------------|---------------|-----------------|-----------------|--------|--------|------------|-----------------------|------------------|
| 0,9804          | IPI00017448,<br>IPI00387084 | 1             | 1               | RPS21,<br>RPS21 | 2108   | 2+     | -0,0120    | 0,9994                | K.TYAICGAIR.R    |

### Peptide Details

#### SHOW MODIFICATIONS

|              |           |                |         |          |                                                                                         |
|--------------|-----------|----------------|---------|----------|-----------------------------------------------------------------------------------------|
| Scan         | 2108      | Delta Mass     | -0.0120 | Protein  | IPI00017448                                                                             |
| Mass         | 1024.5240 | Next           | 290.000 | Fraction | VF_T13h_band05.mzXML                                                                    |
| Hyper        | 451.000   | PeptideProphet | 1.00    | Run      | VF_T13h_band05.sep.xml (Ytor/VF_T13h_band05<br>(VF_SILAC_AssimtWindow_NewPL_4da_Human)) |
| Protein Hits | 2         | Ion Percent    | 88%     |          |                                                                                         |
| Charge       | 2+        | B              | 1.000   |          |                                                                                         |

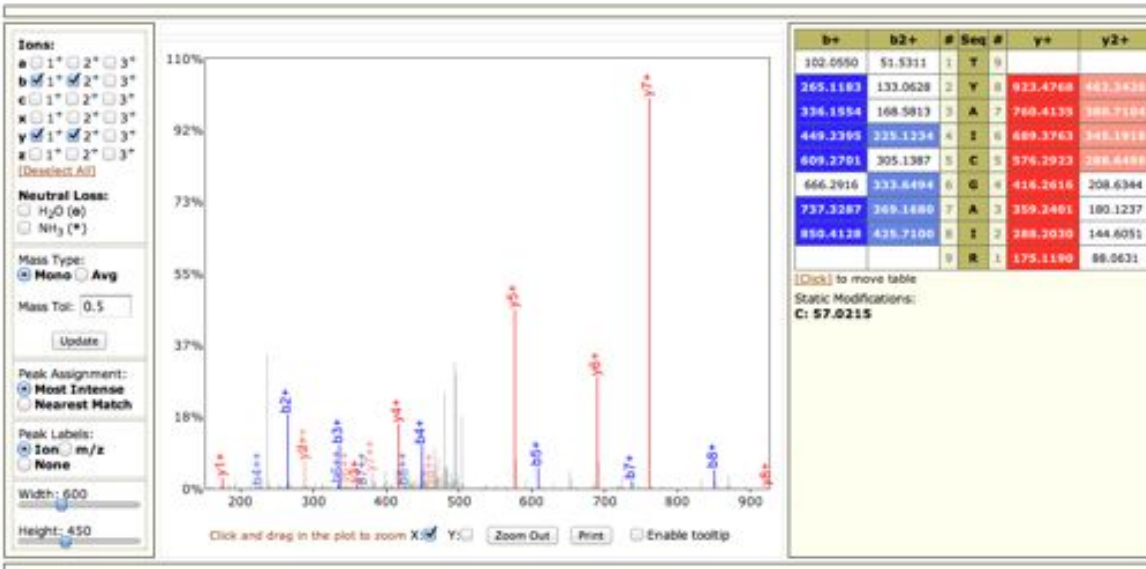

| b+       | b2+      | # | Seq # | y+       | y2+      |
|----------|----------|---|-------|----------|----------|
| 102.0590 | 51.5311  | 1 | T     |          |          |
| 265.1183 | 133.0628 | 2 | Y     | 923.4768 | 463.3428 |
| 336.1954 | 168.5813 | 3 | A     | 766.4139 | 386.7184 |
| 449.3393 | 225.1234 | 4 | I     | 689.3763 | 345.1918 |
| 609.2701 | 305.1387 | 5 | C     | 574.2923 | 286.6488 |
| 666.2916 | 333.6494 | 6 | G     | 414.2616 | 208.6344 |
| 737.3287 | 369.1680 | 7 | A     | 359.3461 | 180.1237 |
| 850.4138 | 425.7100 | 8 | I     | 288.2030 | 144.6031 |
|          |          | 9 | R     | 175.1190 | 88.0631  |

[Click] to move table

Static Modifications:

C: 57.0215

| Protein Probab. | Protein                                     | Tot. Peptides | Unique Peptides | Best Gene Name               | Scan # | Charge | Delta Mass | Peptide Prophet Score | Peptide Sequence |
|-----------------|---------------------------------------------|---------------|-----------------|------------------------------|--------|--------|------------|-----------------------|------------------|
| 0,9721          | IPI00167433,<br>IPI00894257,<br>IPI00440693 | 1             | 1               | FDX1L,<br>MGC19604,<br>FDX1L | 2110   | 2+     | -0,0135    | 0,9991                | R.VGDNVLHLAQR.H  |

### Peptide Details

#### SHOW MODIFICATIONS

|              |           |                 |         |          |                                                                                     |
|--------------|-----------|-----------------|---------|----------|-------------------------------------------------------------------------------------|
| Scan         | 2110      | Delta Mass      | -0.0135 | Protein  | IPI00167433                                                                         |
| Mass         | 1221.6700 | Next            | 292.000 | Fraction | VF_T13h_band04.mzXML                                                                |
| Hyper        | 446.000   | Peptide/Prophet | 1.00    | Run      | VF_T13h_band04.pep.xml (Vfor/VF_T13h_band04 (VF_SILAC_AasmtWindow_NewPL_4ds_Human)) |
| Protein Hits | 3         | Ion Percent     | 85%     |          |                                                                                     |
| Charge       | 2+        | B               | 1.000   |          |                                                                                     |

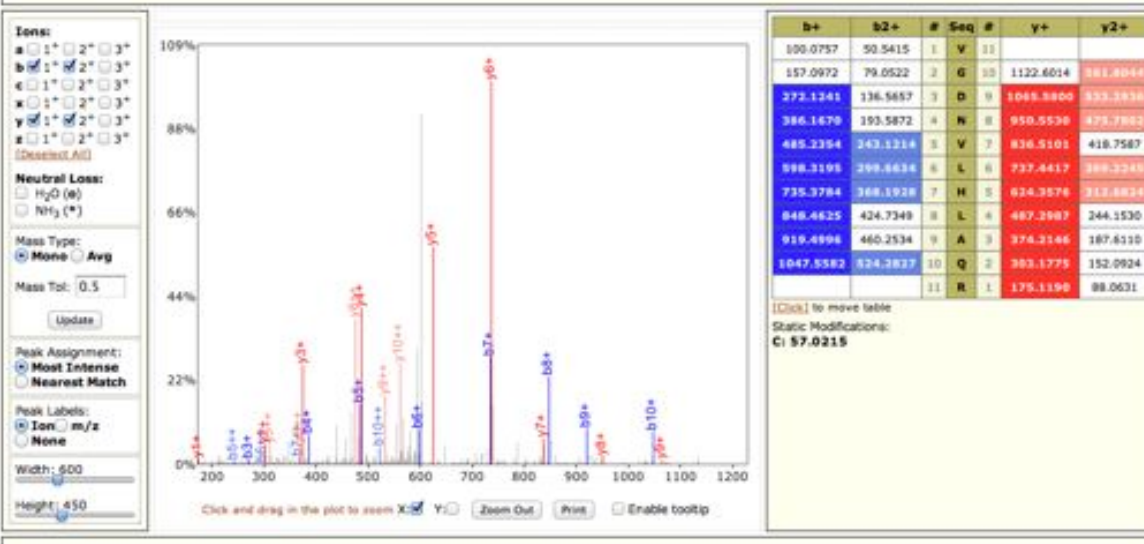

Click to move table

Static Modifications:  
C: 57.0215

| Protein Probab. | Protein     | Tot. Peptides | Unique Peptides | Best Gene Name | Scan # | Charge | Delta Mass | Peptide Prophet Score | Peptide Sequence   |
|-----------------|-------------|---------------|-----------------|----------------|--------|--------|------------|-----------------------|--------------------|
| 0,9801          | IP100009634 | 1             | 1               | SQRDL          | 2124   | 2+     | -0,0128    | 0,9999                | K.TAAVAQAQSGILDR.T |

### Peptide Details

#### SHOW MODIFICATIONS

|              |           |                 |         |          |                                                                                      |
|--------------|-----------|-----------------|---------|----------|--------------------------------------------------------------------------------------|
| Scan         | 2124      | Delta Mass      | -0.0128 | Protein  | IP100009634                                                                          |
| Mass         | 1343.7280 | Next            | 327.000 | Fraction | VF_T13h_band02.mzXML                                                                 |
| Hyper        | 609.000   | Peptide/Prophet | 1.00    | Run      | VF_T13h_band02.pep.xml (Vitor/VF_T13h_band02 (vF_SILAC_AssmtWindow_NewPL_4da_Human)) |
| Protein Hits | 1         | Ion Percent     | 85%     |          |                                                                                      |
| Charge       | 2+        | B               | 1.000   |          |                                                                                      |

#### Ions:

- 1<sup>+</sup>  2<sup>+</sup>  3<sup>+</sup>  
 1<sup>+</sup>  2<sup>+</sup>  3<sup>+</sup>

[Deselect All]

#### Neutral Loss:

- H<sub>2</sub>O (b)  
 NH<sub>3</sub> (\*)

#### Mass Type:

- Mono  Avg

Mass Tol: 0.5

[Update]

#### Peak Assignment:

- Most Intense  Nearest Match

#### Peak Labels:

- Ion  m/z

Width: 600

Height: 450

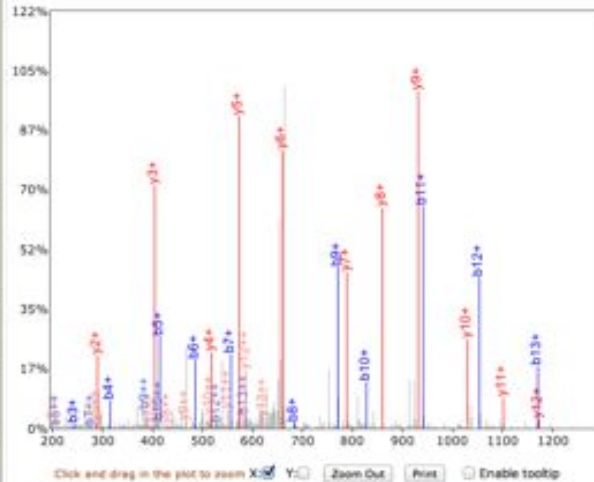

| b+        | b2+      | #  | Seq # | y+        | y2+      |
|-----------|----------|----|-------|-----------|----------|
| 102.0550  | 51.5311  | 1  | T 14  |           |          |
| 173.0921  | 87.0497  | 2  | A 33  | 1242.6801 | 631.6437 |
| 244.1393  | 122.5682 | 3  | A 12  | 1171.6430 | 569.3291 |
| 315.1463  | 158.0868 | 4  | A 51  | 1100.6059 | 508.0064 |
| 414.2347  | 207.6210 | 5  | V 10  | 1029.5687 | 518.2890 |
| 485.2718  | 243.1295 | 6  | A 8   | 930.5903  | 465.7338 |
| 556.3089  | 278.6381 | 7  | A 8   | 839.4832  | 430.2357 |
| 684.3675  | 342.6874 | 8  | Q 7   | 788.4261  | 384.7187 |
| 771.3995  | 384.1034 | 9  | S 6   | 640.3475  | 330.6874 |
| 838.4316  | 414.7141 | 10 | G 5   | 573.3355  | 287.1714 |
| 941.5051  | 471.2562 | 11 | I 6   | 516.3140  | 258.6606 |
| 1054.5891 | 527.7982 | 12 | L 3   | 483.2306  | 283.1186 |
| 1169.6161 | 585.3117 | 13 | D 2   | 290.1459  | 145.5766 |
|           |          | 14 | H 1   | 175.1190  | 88.0631  |

[Click] to move table

Static Modifications:

C: 57.0215

Click and drag in the plot to zoom X: [ ] Y: [ ] [Zoom Out] [Print] [Enable tooltip]

| Protein Probab. | Protein                     | Tot. Peptides | Unique Peptides | Best Gene Name      | Scan # | Charge | Delta Mass | Peptide Prophet Score | Peptide Sequence    |
|-----------------|-----------------------------|---------------|-----------------|---------------------|--------|--------|------------|-----------------------|---------------------|
| 0,9661          | IPI00647328,<br>IPI00217871 | 1             | 1               | ALDH4A1,<br>ALDH4A1 | 2126   | 2+     | -0,0149    | 0,9991                | K.STGSIVGQQPFGGAR.A |

### Peptide Details

#### SHOW MODIFICATIONS

|              |           |                |         |          |                                                                                      |
|--------------|-----------|----------------|---------|----------|--------------------------------------------------------------------------------------|
| Scan         | 2126      | Delta Mass     | -0.0149 | Protein  | IPI00217871                                                                          |
| Mass         | 1461.7440 | Next           | 300.000 | Fraction | VF_T13H_band02.mzXML                                                                 |
| Hyper        | 454.000   | PeptideProphet | 1.00    | Run      | VF_T13H_band02.pep.xml (Vitor/VF_T13H_band02 (VF_SILAC_AssmtWindow_NewPL_4da_Human)) |
| Protein Hits | 2         | Ion Percent    | 71%     |          |                                                                                      |
| Charge       | 2+        | B              | 1.000   |          |                                                                                      |

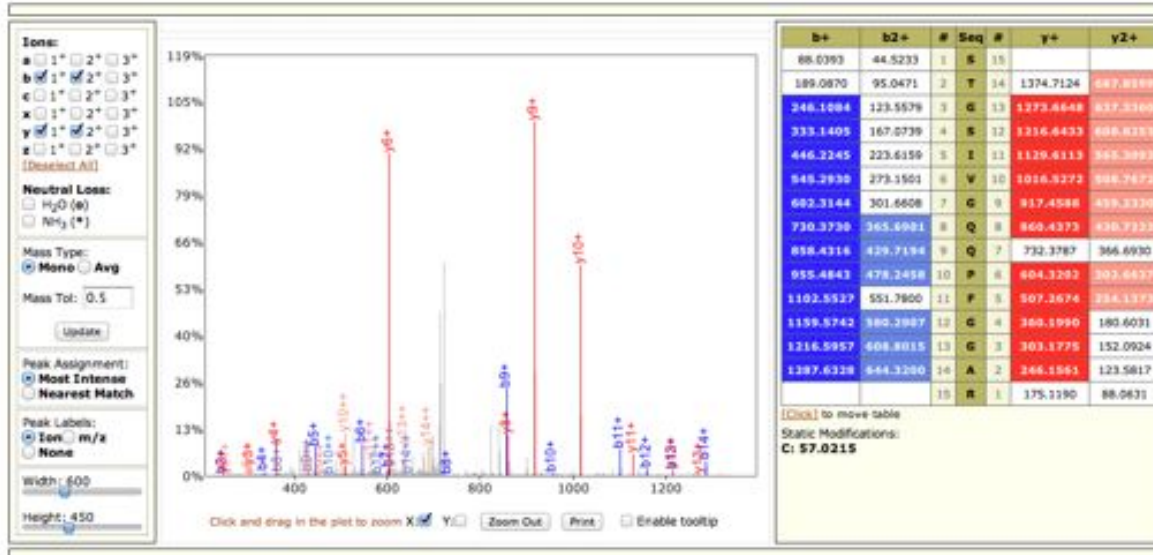

| Protein Probab. | Protein                                     | Tot. Peptides | Unique Peptides | Best Gene Name      | Scan # | Charge | Delta Mass | Peptide Prophet Score | Peptide Sequence         |
|-----------------|---------------------------------------------|---------------|-----------------|---------------------|--------|--------|------------|-----------------------|--------------------------|
| 0,9783          | IP100910365,<br>IP100216192,<br>IP100006615 | 1             | 1               | -,<br>CLPB,<br>CLPB | 2150   | 2+     | -0,0279    | 0,9998                | K.FIGSPPGYVVGHEEGQLTK'.K |

**Peptide Details**

SHOW MODIFICATIONS

|              |           |                |         |          |                                                                                       |
|--------------|-----------|----------------|---------|----------|---------------------------------------------------------------------------------------|
| Scan         | 2150      | Delta Mass     | -0.0279 | Protein  | IP100006615                                                                           |
| Mass         | 1978.9960 | Next           | 225.000 | Fraction | VF_T13h_band02.mzXML                                                                  |
| Hyper        | 432.000   | PeptideProphet | 1.00    | Run      | VF_T13h_band02.pep.xml (Vitor/VF_T13h_band02 (VF_SSLAC_Assin(Window_NewPL_40a_Human)) |
| Protein Hits | 3         | Ion Percent    | 78%     |          |                                                                                       |
| Charge       | 2+        | B              | 1.000   |          |                                                                                       |

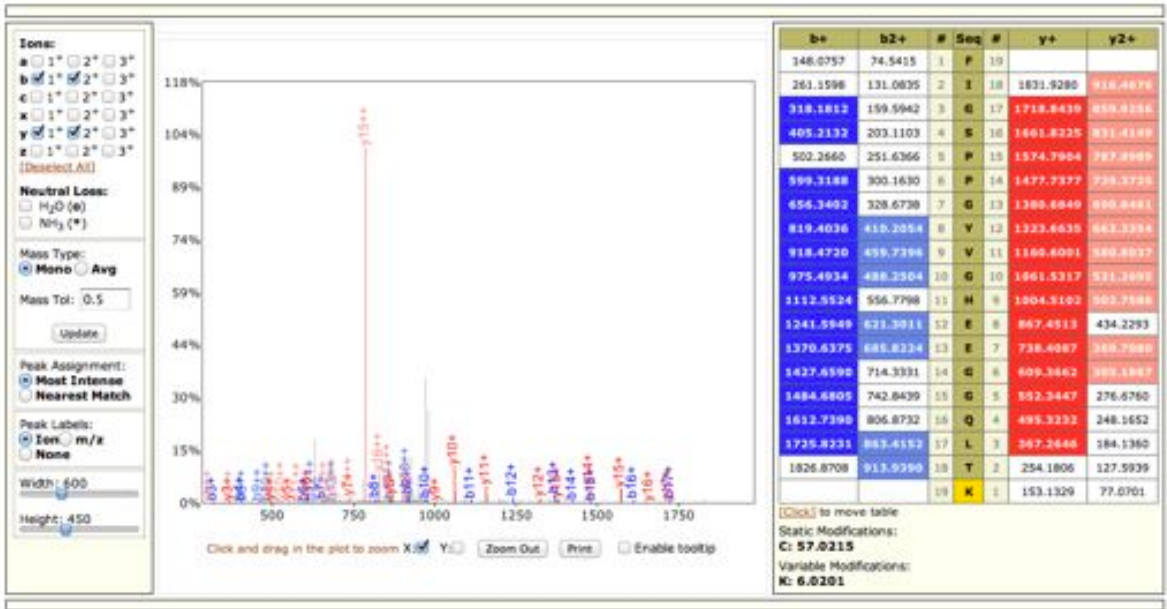



| Protein Probab. | Protein                                     | Tot. Peptides | Unique Peptides | Best Gene Name      | Scan # | Charge | Delta Mass | Peptide Prophet Score | Peptide Sequence    |
|-----------------|---------------------------------------------|---------------|-----------------|---------------------|--------|--------|------------|-----------------------|---------------------|
| 0,9869          | IP100909094,<br>IP100552913,<br>IP100289876 | 1             | 1               | -,<br>STX7,<br>STX7 | 2166   | 2+     | -0,0178    | 0,9999                | R.TLNQLGTPQDSPELR.Q |

### Peptide Details

Google Maps  
<http://maps.google.com/>

#### SHOW MODIFICATIONS

|              |           |                |         |          |                                                                                      |
|--------------|-----------|----------------|---------|----------|--------------------------------------------------------------------------------------|
| Scan         | 2166      | Delta Mass     | -0.0178 | Protein  | IP100289876                                                                          |
| Mass         | 1668.8550 | Next           | 275.000 | Fraction | VF_T13h_band03.mzXML                                                                 |
| Hyper        | 523.000   | PeptideProphet | 1.00    | Run      | VF_T13h_band03.pep.xml (Vitor/VF_T13h_band03 (VF_SILAC_AssayWindow_NewPL_4da_Human)) |
| Protein Hits | 3         | Ion Percent    | 82%     |          |                                                                                      |
| Charge       | 2+        | B              | 1.000   |          |                                                                                      |

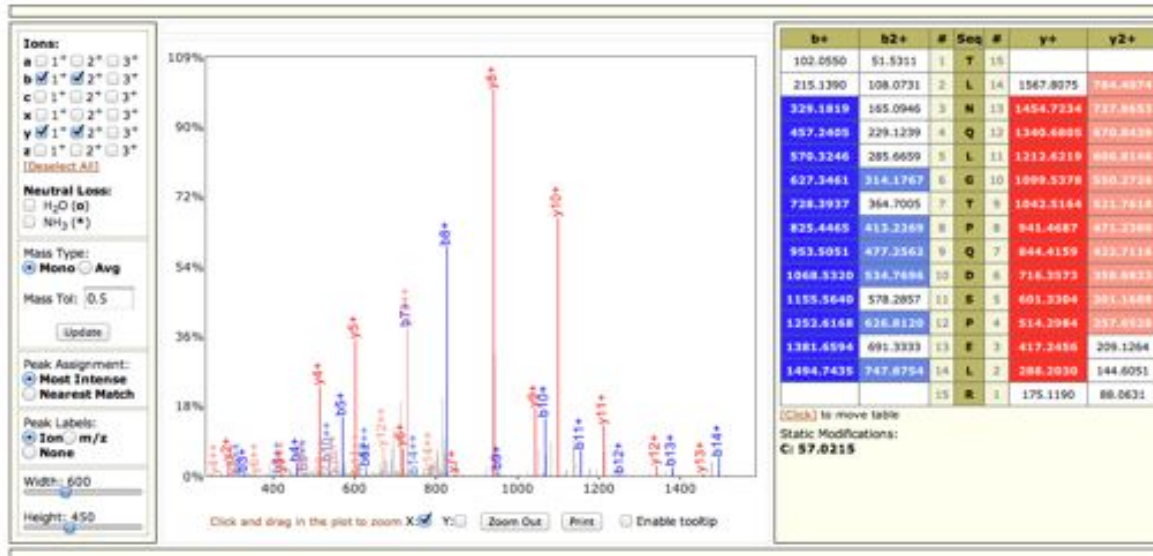

| Protein Probab. | Protein                                                     | Tot. Peptides | Unique Peptides | Best Gene Name                               | Scan # | Charge | Delta Mass | Peptide Prophet Score | Peptide Sequence  |
|-----------------|-------------------------------------------------------------|---------------|-----------------|----------------------------------------------|--------|--------|------------|-----------------------|-------------------|
| 0,9822          | IPI00640511,<br>IPI00019248,<br>IPI00645440,<br>IPI00719170 | 1             | 1               | TRAF3IP3,<br>TRAF3IP3,<br>T3JAM,<br>TRAF3IP3 | 2186   | 2+     | -0,0148    | 0,9998                | R.ELESQLHVLQSK'.L |

Peptide Details

Peptide Details

SHOW MODIFICATIONS

|              |           |                 |         |          |                                                                                        |
|--------------|-----------|-----------------|---------|----------|----------------------------------------------------------------------------------------|
| Scan         | 2186      | Delta Mass      | -0.0148 | Protein  | IPI00019248                                                                            |
| Mass         | 1416.7790 | Next            | 252.000 | Fraction | VF_T13h_band04.mzXML                                                                   |
| Hyper        | 465.000   | Peptide/Prophet | 1.00    | Run      | VF_T13h_band04.pep.xml (Vitor/VF_T13h_band04<br>(VF_SILAC_AssimWindow_NewP_4da_Human)) |
| Protein Hits | 4         | Ion Percent     | 82%     |          |                                                                                        |
| Charge       | 2+        | B               | 1.000   |          |                                                                                        |

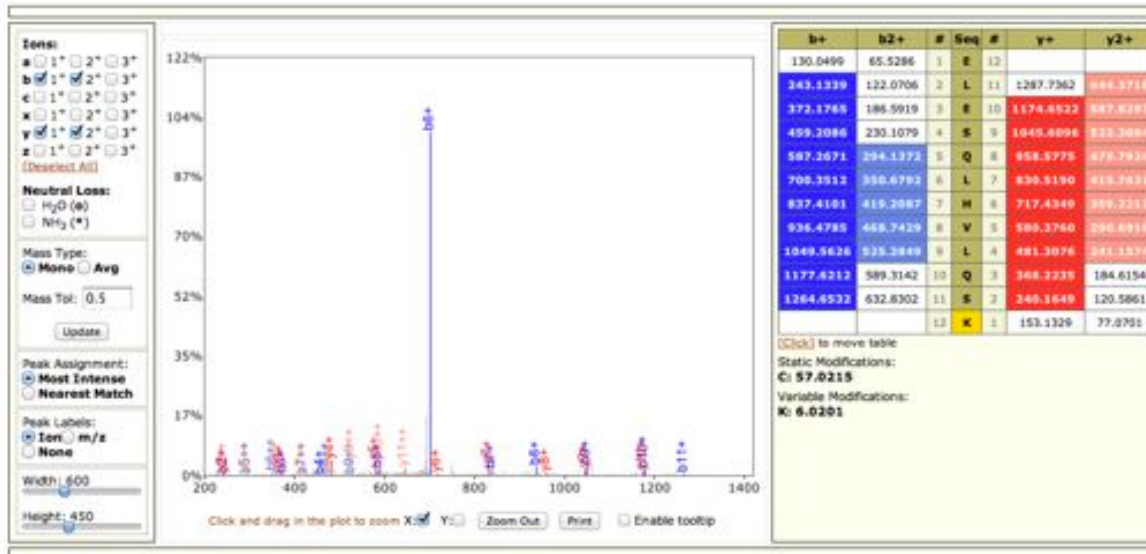

| Protein Probab. | Protein                     | Tot. Peptides | Unique Peptides | Best Gene Name  | Scan # | Charge | Delta Mass | Peptide Prophet Score | Peptide Sequence |
|-----------------|-----------------------------|---------------|-----------------|-----------------|--------|--------|------------|-----------------------|------------------|
| 0,9764          | IP100550234,<br>IP100007280 | 1             | 1               | ARPC5,<br>ARPC5 | 2212   | 2+     | -0,0137    | 0,9988                | K.ALAAGGVGSIVR.V |

### Peptide Details

#### SHOW MODIFICATIONS

|              |           |                |         |          |                                                                                        |
|--------------|-----------|----------------|---------|----------|----------------------------------------------------------------------------------------|
| Scan         | 2212      | Delta Mass     | -0.0137 | Protein  | IP100007280                                                                            |
| Mass         | 1070.6320 | Next           | 267.000 | Fraction | VF_T13h_band06.mzXML                                                                   |
| Hyper        | 434.000   | PeptideProphet | 1.00    | Run      | VF_T13h_band06.pep.xml (Vitor/VF_T13h_band06<br>(VF_52LAC_AssmtWindow_NewR_45a_Human)) |
| Protein Hits | 2         | Ion Percent    | 86%     |          |                                                                                        |
| Charge       | 2+        | B              | 1.000   |          |                                                                                        |

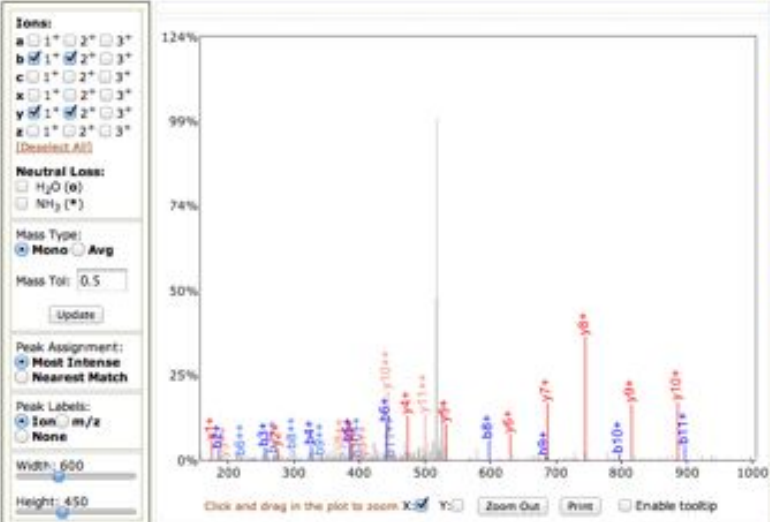

| b+       | b2+      | #  | Seq # | y+       | y2+      |
|----------|----------|----|-------|----------|----------|
| 72.0444  | 36.5258  | 1  | A 12  |          |          |
| 189.1285 | 93.0579  | 2  | L 11  | 999.5946 | 340.3099 |
| 256.1656 | 128.5864 | 3  | A 10  | 886.5105 | 443.7528 |
| 327.2027 | 164.1050 | 4  | A 9   | 815.4734 | 488.3493 |
| 384.2241 | 192.6157 | 5  | G 8   | 744.4363 | 572.7116 |
| 441.2496 | 221.1264 | 6  | G 7   | 687.4148 | 644.2510 |
| 540.3140 | 270.4406 | 7  | V 6   | 630.3933 | 715.7003 |
| 697.3385 | 349.1714 | 8  | G 5   | 531.3249 | 766.1661 |
| 684.3675 | 342.6874 | 9  | S 4   | 474.3035 | 737.6554 |
| 797.4514 | 399.2294 | 10 | I 3   | 387.2714 | 846.1394 |
| 896.5260 | 448.7638 | 11 | V 2   | 274.1874 | 937.5973 |
|          |          | 12 | R 1   | 175.1190 | 88.0631  |

(Click) to move table

Static Modifications:  
C: 57.0215

| Protein Probab. | Protein                     | Tot. Peptides | Unique Peptides | Best Gene Name | Scan # | Charge | Delta Mass | Peptide Prophet Score | Peptide Sequence  |
|-----------------|-----------------------------|---------------|-----------------|----------------|--------|--------|------------|-----------------------|-------------------|
| 0,9801          | IP100796659,<br>IP100025049 | 1             | 1               | M6PR,<br>M6PR  | 2220   | 2+     | -0,0140    | 0,9999                | R.HTLADNFPVSEER.G |

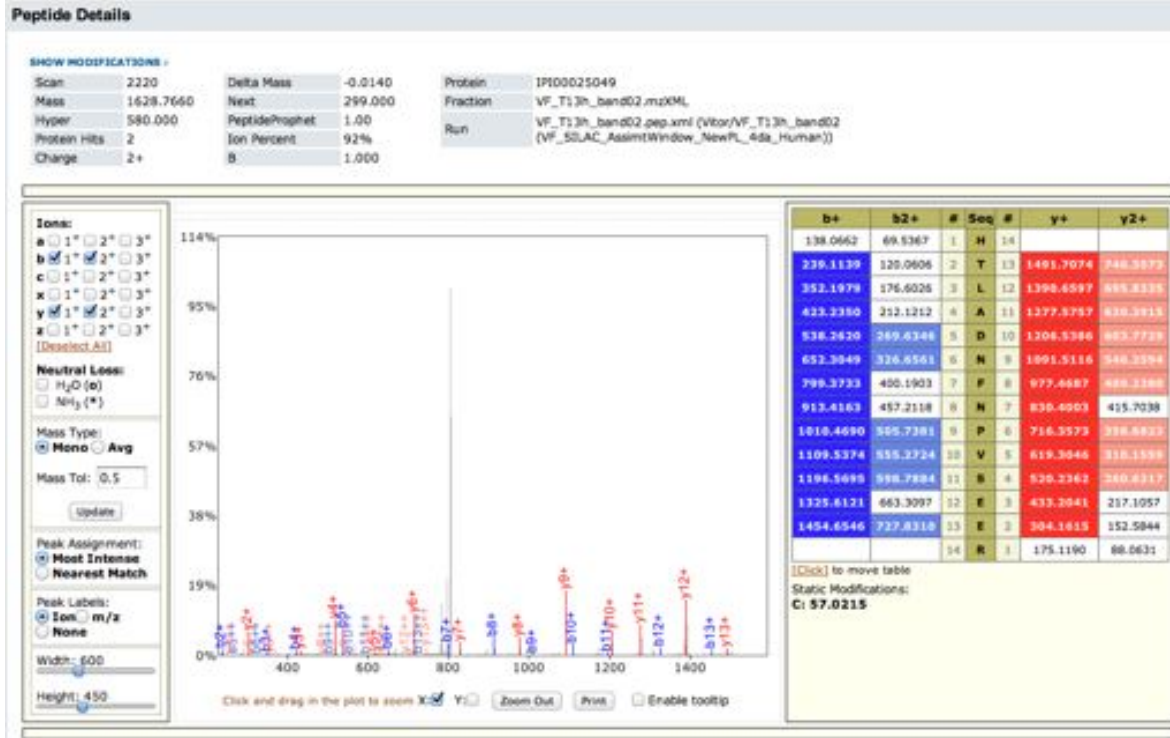

| Protein Probab. | Protein                                     | Tot. Peptides | Unique Peptides | Best Gene Name      | Scan # | Charge | Delta Mass | Peptide Prophet Score | Peptide Sequence     |
|-----------------|---------------------------------------------|---------------|-----------------|---------------------|--------|--------|------------|-----------------------|----------------------|
| 0,9810          | IP100911004,<br>IP100878551,<br>IP100010796 | 1             | 1               | -,<br>P4HB,<br>P4HB | 2255   | 2+     | -0,0189    | 0,9999                | K.VDATEESDLAQQYGVR.G |

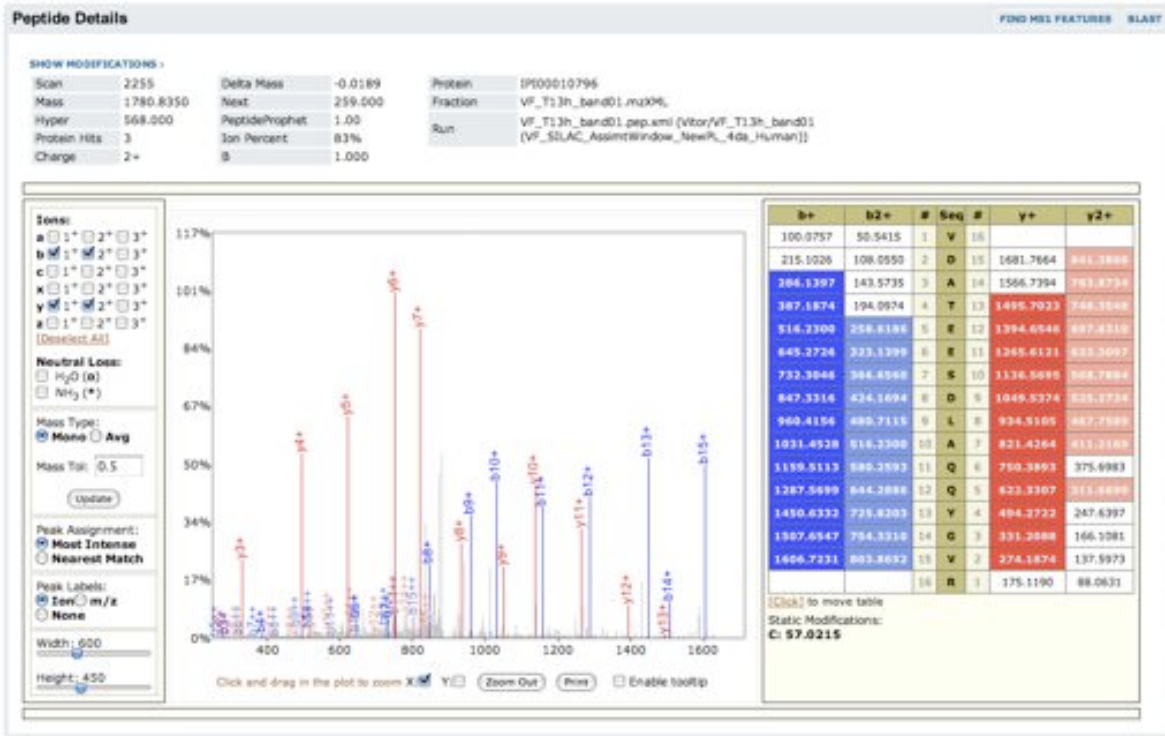

| Protein Probab. | Protein                                                     | Tot. Peptides | Unique Peptides | Best Gene Name                  | Scan # | Charge | Delta Mass | Peptide Prophet Score | Peptide Sequence   |
|-----------------|-------------------------------------------------------------|---------------|-----------------|---------------------------------|--------|--------|------------|-----------------------|--------------------|
| 0,9822          | IPI00909247,<br>IPI00005159,<br>IPI00470573,<br>IPI00749250 | 1             | 1               | -,<br>ACTR2,<br>ACTR2,<br>ACTR2 | 2258   | 2+     | -0,0141    | 0,9995                | R.GYAFNHSADFETVR.M |

### Peptide Details

#### SHOW MODIFICATIONS

|              |           |                |         |          |                                                                                         |
|--------------|-----------|----------------|---------|----------|-----------------------------------------------------------------------------------------|
| Scan         | 2258      | Delta Mass     | -0.0141 | Protein  | IP00005159                                                                              |
| Mass         | 1613.7340 | Next           | 259.000 | Fraction | VF_T13h_band03.mzXML                                                                    |
| Hyper        | 437.000   | PeptideProphet | 1.00    | Run      | VF_T13h_band03.pep.xml (Vtor/VF_T13h_band03<br>[VF_SILAC_AssimtWindow_NewPL_4da_Human]) |
| Protein Hits | 4         | Ion Percent    | 81%     |          |                                                                                         |
| Charge       | 2+        | B              | 1.000   |          |                                                                                         |

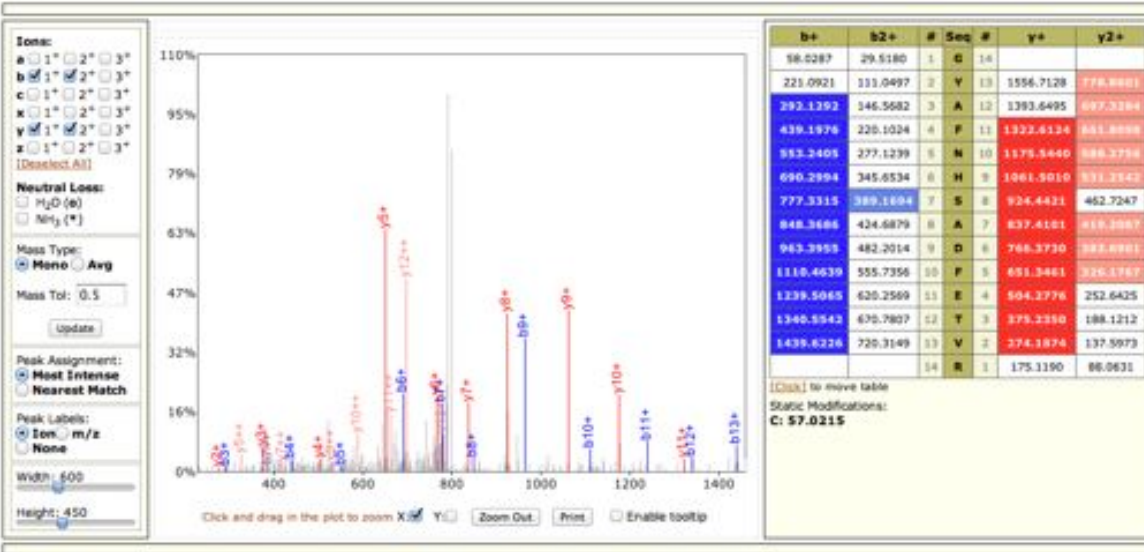

| Protein Probab. | Protein                     | Tot. Peptides | Unique Peptides | Best Gene Name      | Scan # | Charge | Delta Mass | Peptide Prophet Score | Peptide Sequence |
|-----------------|-----------------------------|---------------|-----------------|---------------------|--------|--------|------------|-----------------------|------------------|
| 0,8213          | IPI00219160,<br>IPI00741167 | 1             | 1               | RPL34,<br>LOC651249 | 2260   | 2+     | -0,0103    | 0,9815                | R.AFLIEEQK.I     |

### Peptide Details

#### SHOW MODIFICATIONS

|              |          |                |         |          |                                                                                       |
|--------------|----------|----------------|---------|----------|---------------------------------------------------------------------------------------|
| Scan         | 2260     | Delta Mass     | -0.0103 | Protein  | IPI00219160                                                                           |
| Mass         | 977.5300 | Next           | 476.000 | Fraction | VF_T13H_band06.mzXML                                                                  |
| Hyper        | 519.000  | PeptideProphet | 0.98    | Run      | VF_T13H_band06.pep.xml (Vitor/VF_T13H_band06 (VF_SILAC_AssimtWindow_NewPL_4da_Human)) |
| Protein Hits | 2        | Ion Percent    | 93%     |          |                                                                                       |
| Charge       | 2+       | B              | 1.000   |          |                                                                                       |

#### Ions:

- a  1+  2+  3+
- b**  1+  2+  3+
- c  1+  2+  3+
- x  1+  2+  3+
- y**  1+  2+  3+
- z  1+  2+  3+

[Delete All]

#### Neutral Loss:

- H<sub>2</sub>O (0)
- NH<sub>3</sub> (\*)

#### Mass Type:

- Mono  Avg

Mass Tol: 0.5

Update

#### Peak Assignment:

- Most Intense
- Nearest Match

#### Peak Labels:

- Ion, m/z
- None

Width: 600

Height: 450

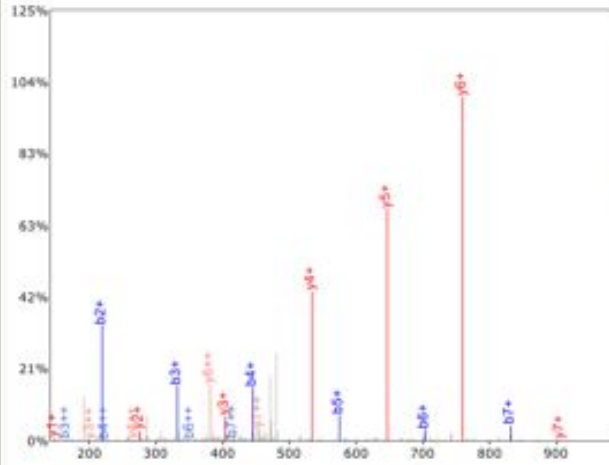

Click and drag in the plot to zoom X: Y: Zoom Out Print Enable tooltip

| b+       | b2+      | # | Seq | # | y+       | y2+      |
|----------|----------|---|-----|---|----------|----------|
| 72.0444  | 36.5258  | 1 | A   | 8 |          |          |
| 219.1128 | 110.0600 | 2 | F   | 7 | 806.4931 | 483.7502 |
| 332.1969 | 166.6031 | 3 | L   | 6 | 759.4247 | 386.3160 |
| 445.2809 | 233.1441 | 4 | I   | 5 | 646.3406 | 323.6740 |
| 574.3225 | 287.6654 | 5 | E   | 4 | 533.2566 | 247.1319 |
| 703.3661 | 352.1867 | 6 | E   | 3 | 404.2140 | 303.8106 |
| 831.4247 | 416.2160 | 7 | Q   | 2 | 275.1714 | 138.0893 |
|          |          | 8 | K   | 1 | 147.1128 | 74.0600  |

[Click] to move table

Static Modifications:

C: 57.0215

| Protein Probab. | Protein     | Tot. Peptides | Unique Peptides | Best Gene Name | Scan # | Charge | Delta Mass | Peptide Prophet Score | Peptide Sequence |
|-----------------|-------------|---------------|-----------------|----------------|--------|--------|------------|-----------------------|------------------|
| 0,9857          | IPI00219219 | 1             | 1               | LGALS1         | 2276   | 2+     | -0,0182    | 0,9998                | K.DSNNLCLHFNPR.F |

### Peptide Details

#### SHOW MODIFICATIONS

|              |           |                 |         |          |                                              |
|--------------|-----------|-----------------|---------|----------|----------------------------------------------|
| Scan         | 2276      | Delta Mass      | -0.0182 | Protein  | IPI00219219                                  |
| Mass         | 1486.6960 | Next            | 323.000 | Fraction | VF_T13h_band03.mzXML                         |
| Hydr         | 535.000   | Peptide/prophet | 1.00    | Run      | VF_T13h_band03.pep.xml (vitor/VF_T13h_band03 |
| Protein Hits | 1         | Ion Percent     | 77%     |          | (VF_50LAC_Assimr@window_NewPt_4da_Human)}    |
| Charge       | 2+        | B               | 1.000   |          |                                              |

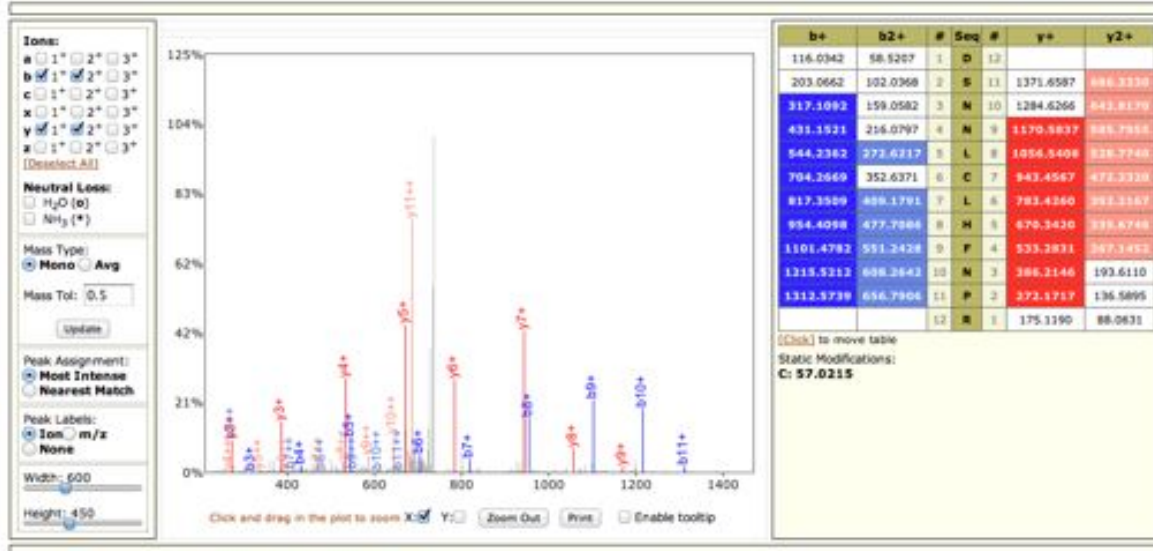



| Protein Probab. | Protein                     | Tot. Peptides | Unique Peptides | Best Gene Name   | Scan # | Charge | Delta Mass | Peptide Prophet Score | Peptide Sequence |
|-----------------|-----------------------------|---------------|-----------------|------------------|--------|--------|------------|-----------------------|------------------|
| 0,9859          | IPI00019329,<br>IPI00062037 | 1             | 1               | DNCL1,<br>DYNLL2 | 2308   | 2+     | -0,0185    | 0,9997                | K.YNPTWHCIVGR.N  |

### Peptide Details

#### SHOW MODIFICATIONS -

|                 |                      |                                                   |
|-----------------|----------------------|---------------------------------------------------|
| Scan: 2308      | Delta Mass: -0.0185  | Protein: IPI00019329                              |
| Mass: 1402.6680 | Next: 275.000        | Fraction: VF_T13h_band06.mzXML                    |
| Hyper: 499.000  | PeptideProphet: 1.00 | Run: VF_T13h_band06 pep.xml (Vitor/VF_T13h_band06 |
| Protein Hits: 2 | Ion Percent: 85%     | (VF_SILAC_AssimWindow_NewPt_4da_Human)            |
| Charge: 2+      | B: 1.000             |                                                   |

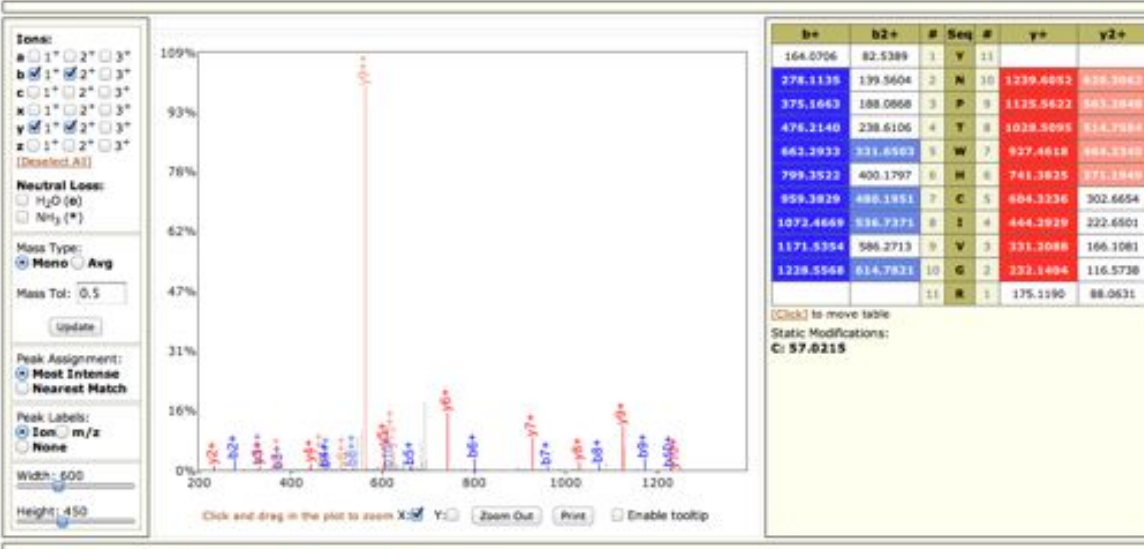

| Protein Probab. | Protein                                                     | Tot. Peptides | Unique Peptides | Best Gene Name               | Scan # | Charge | Delta Mass | Peptide Prophet Score | Peptide Sequence |
|-----------------|-------------------------------------------------------------|---------------|-----------------|------------------------------|--------|--------|------------|-----------------------|------------------|
| 0,8411          | IPI00902623,<br>IPI00797025,<br>IPI00022284,<br>IPI00382843 | 1             | 1               | -,<br>PRNP,<br>PRNP,<br>PRNP | 2315   | 2+     | -0,0147    | 0,9856                | R.VVEQMCITQYER.E |

### Peptide Details

#### SHOW MODIFICATIONS

|              |           |                |         |          |                                                                                         |
|--------------|-----------|----------------|---------|----------|-----------------------------------------------------------------------------------------|
| Scan         | 2315      | Delta Mass     | -0.0147 | Protein  | IPI00022284                                                                             |
| Mass         | 1555.7240 | Next           | 268.000 | Fraction | VF_T13h_band03.mzXML                                                                    |
| Hyper        | 360.000   | PeptideProphet | 0.99    | Run      | VF_T13h_band03.pep.xml (Vloc/VF_T13h_band03<br>(VF_SILAC_AssimtWindow_NewPL_4da_Human)) |
| Protein Hits | 4         | Ion Percent    | 82%     |          |                                                                                         |
| Charge       | 2+        | B              | 1.000   |          |                                                                                         |

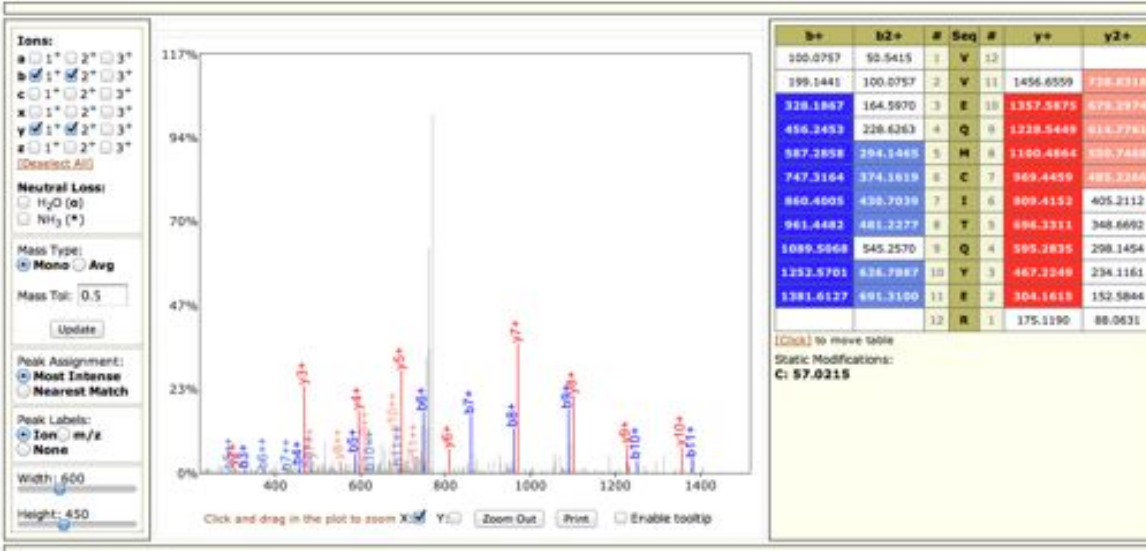

| Protein Probab. | Protein     | Tot. Peptides | Unique Peptides | Best Gene Name | Scan # | Charge | Delta Mass | Peptide Prophet Score | Peptide Sequence   |
|-----------------|-------------|---------------|-----------------|----------------|--------|--------|------------|-----------------------|--------------------|
| 0,9566          | IP100003362 | 1             | 1               | HSPA5          | 2378   | 2+     | -0,0206    | 0,9980                | K.NQLTSNPENTVFDK.R |

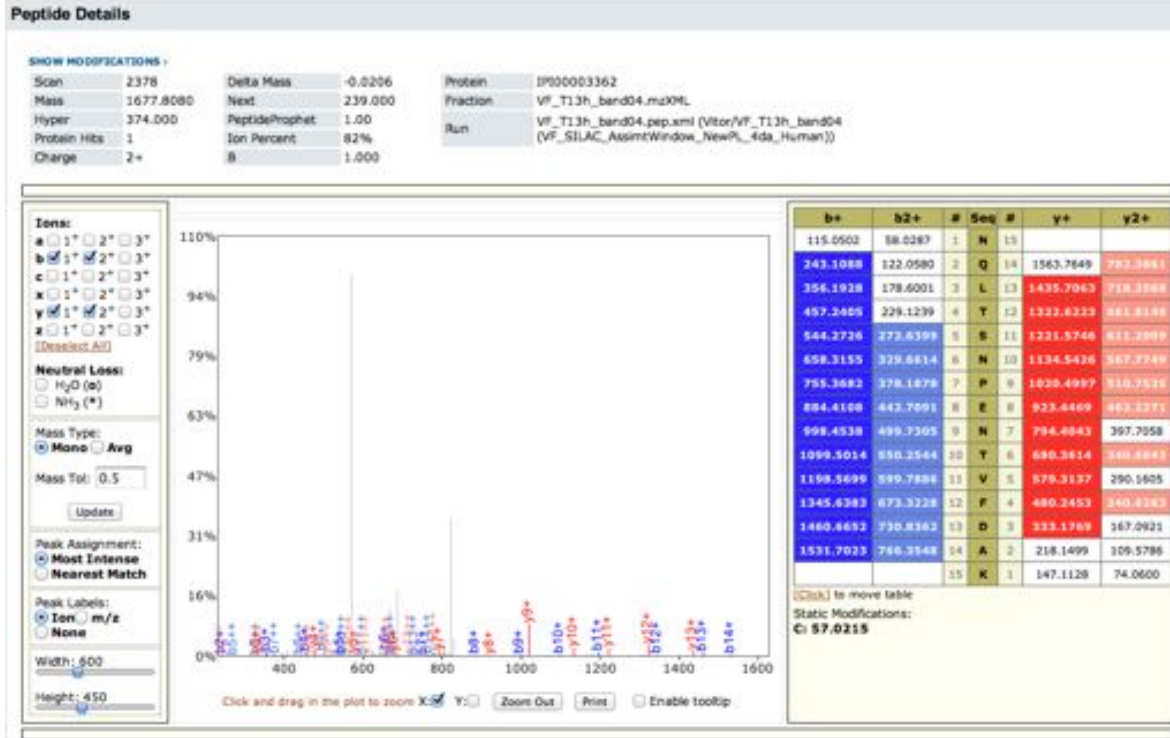

| Protein Probab. | Protein                     | Tot. Peptides | Unique Peptides | Best Gene Name        | Scan # | Charge | Delta Mass | Peptide Prophet Score | Peptide Sequence  |
|-----------------|-----------------------------|---------------|-----------------|-----------------------|--------|--------|------------|-----------------------|-------------------|
| 0,9822          | IPI00798088,<br>IPI00029046 | 1             | 1               | KIAA0152,<br>KIAA0152 | 2396   | 2+     | -0,0180    | 0,9998                | R.SNPEDQILYQTER.Y |

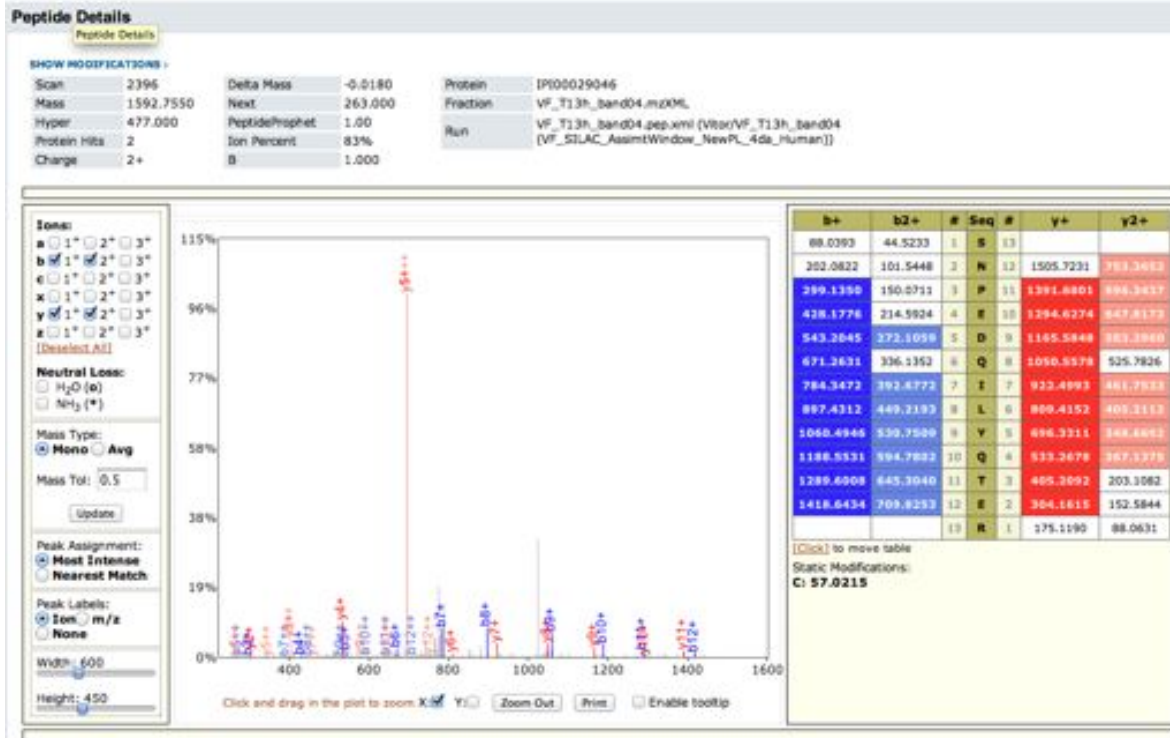

| Protein Probab. | Protein                                                     | Tot. Peptides | Unique Peptides | Best Gene Name                      | Scan # | Charge | Delta Mass | Peptide Prophet Score | Peptide Sequence     |
|-----------------|-------------------------------------------------------------|---------------|-----------------|-------------------------------------|--------|--------|------------|-----------------------|----------------------|
| 0,9776          | IPI00748835,<br>IPI00795504,<br>IPI00807403,<br>IPI00015102 | 1             | 1               | ALCAM,<br>ALCAM,<br>ALCAM,<br>ALCAM | 2413   | 2+     | -0,0192    | 0,9997                | R.QIGDALPVSCTISASR.N |

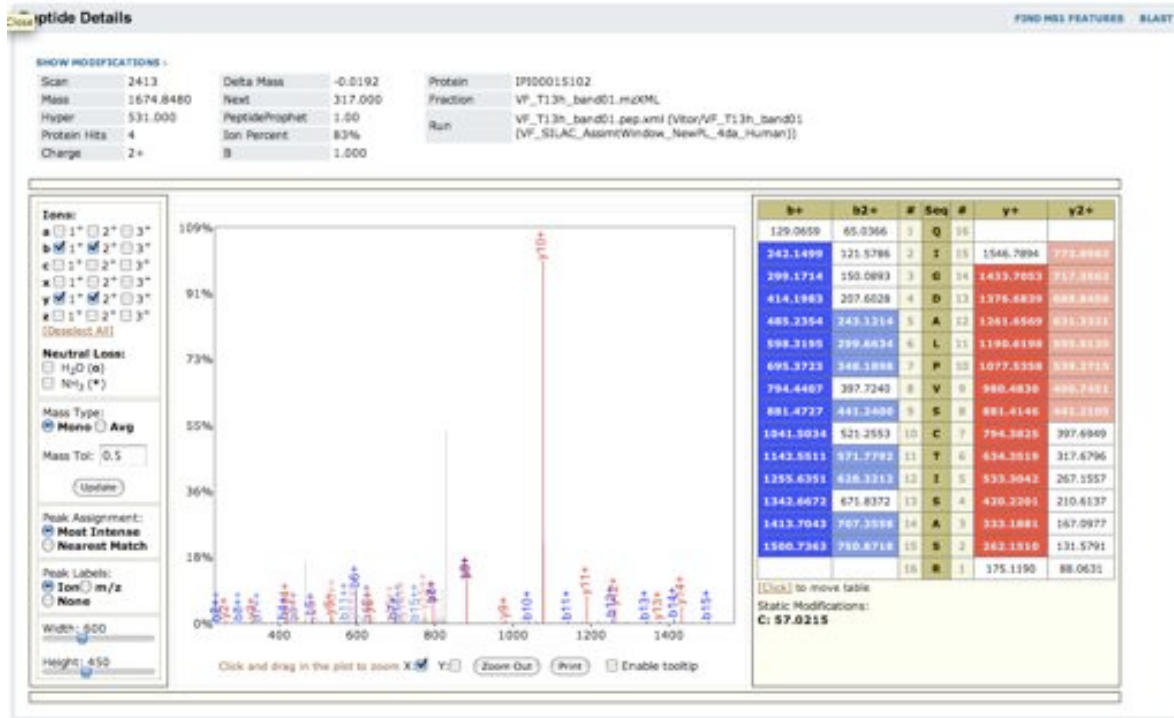

| Protein Probab. | Protein                     | Tot. Peptides | Unique Peptides | Best Gene Name    | Scan # | Charge | Delta Mass | Peptide Prophet Score | Peptide Sequence |
|-----------------|-----------------------------|---------------|-----------------|-------------------|--------|--------|------------|-----------------------|------------------|
| 0,9796          | IPI00063903,<br>IPI00640630 | 1             | 1               | USMG5,<br>USMG5P1 | 2415   | 2+     | -0,0145    | 0,9991                | K.YFNSTLTGR.M    |

### Peptide Details

#### SHOW MODIFICATIONS :

|              |           |                |         |          |                                                                                      |
|--------------|-----------|----------------|---------|----------|--------------------------------------------------------------------------------------|
| Scan         | 2415      | Delta Mass     | -0,0145 | Protein  | IPI00063903                                                                          |
| Mass         | 1221.5900 | Next           | 286.000 | Fraction | VF_T13h_band06.mzXML                                                                 |
| Hyper        | 461.000   | PeptideProphet | 1.00    | Run      | VF_T13h_band06.pep.xml (Vitor/VF_T13h_band06 (VF_SILAC_AssmtWindow_NewPL_4da_Human)) |
| Protein Hits | 2         | Ion Percent    | 94%     |          |                                                                                      |
| Charge       | 2+        | B              | 1.000   |          |                                                                                      |

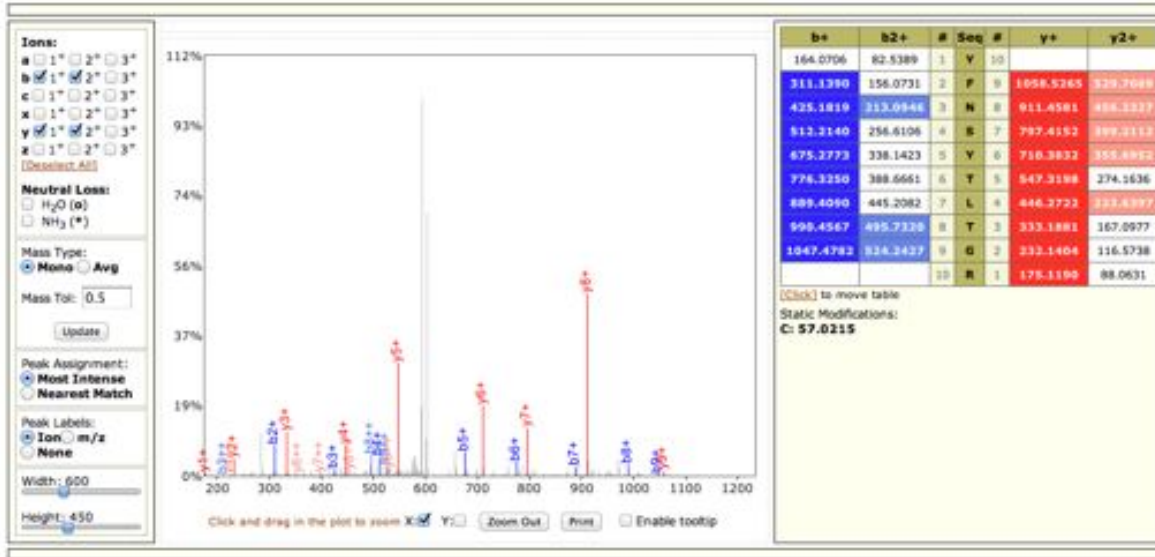

| Protein Probab. | Protein     | Tot. Peptides | Unique Peptides | Best Gene Name | Scan # | Charge | Delta Mass | Peptide Prophet Score | Peptide Sequence |
|-----------------|-------------|---------------|-----------------|----------------|--------|--------|------------|-----------------------|------------------|
| 0.9857          | IPI00022810 | 1             | 1               | CTSC           | 2431   | 2+     | -0.0145    | 0.9998                | R.NVHGINFVSPVR.N |

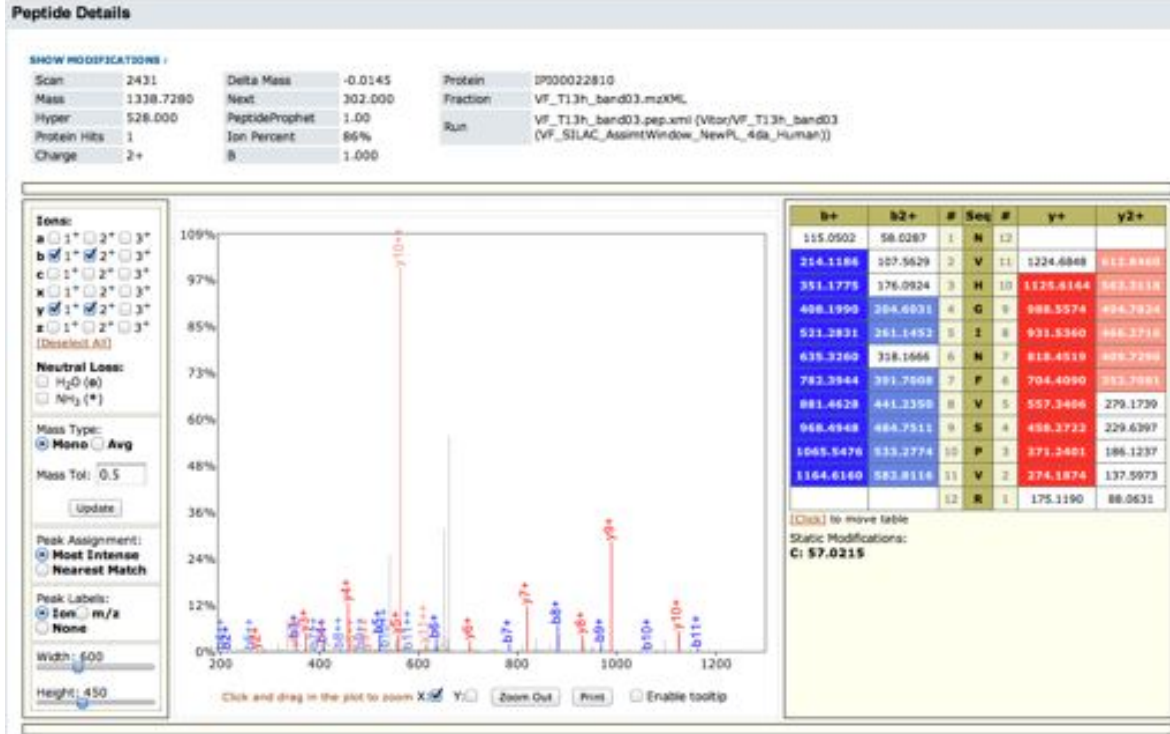

| Protein Probab. | Protein     | Tot. Peptides | Unique Peptides | Best Gene Name | Scan # | Charge | Delta Mass | Peptide Prophet Score | Peptide Sequence |
|-----------------|-------------|---------------|-----------------|----------------|--------|--------|------------|-----------------------|------------------|
| 0.9161          | IPI00011217 | 1             | 1               | NDUFS4         | 2434   | 2+     | -0.0159    | 0.9937                | K.NGWSYDIEER.K   |

Peptide Details

SHOW MODIFICATIONS :

|              |           |                |         |          |                                                                                          |
|--------------|-----------|----------------|---------|----------|------------------------------------------------------------------------------------------|
| Scan         | 2434      | Delta Mass     | -0.0159 | Protein  | IPI00011217                                                                              |
| Mass         | 1268.5540 | Next           | 290.000 | Fraction | VF_T13h_band05.mzXML                                                                     |
| Hyper        | 386.000   | PeptideProphet | 0.99    | Run      | VF_T13h_band05.pep.xml (Vitor/VF_T13h_band05<br>(VF_SILAC_AssimtWindow_NewPL_4da_Human)) |
| Protein Hits | 1         | Ion Percent    | 83%     |          |                                                                                          |
| Charge       | 2+        | B              | 1.000   |          |                                                                                          |

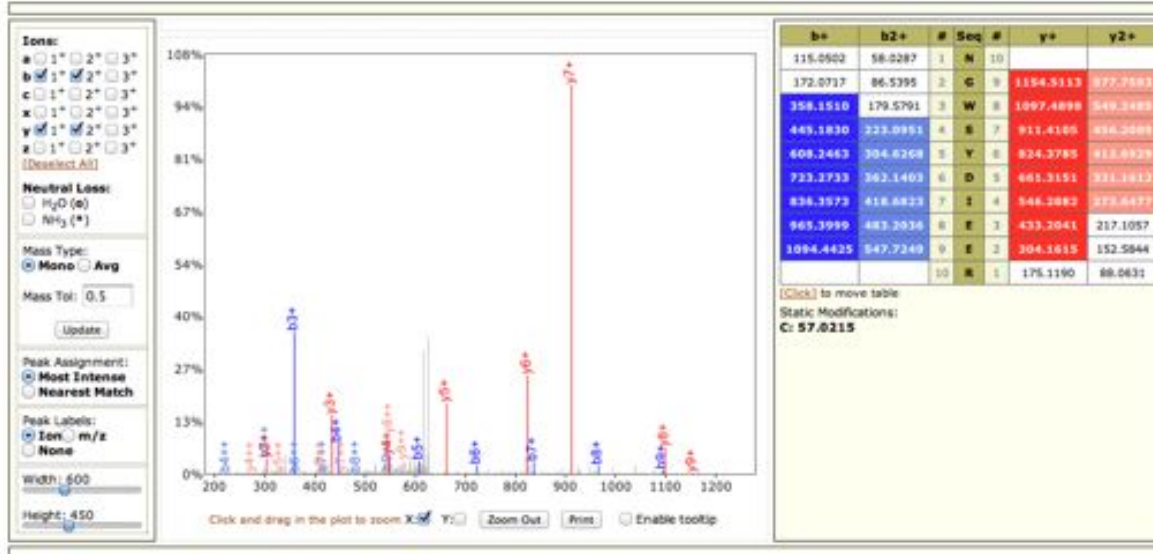



| Protein Probab. | Protein     | Tot. Peptides | Unique Peptides | Best Gene Name | Scan # | Charge | Delta Mass | Peptide Prophet Score | Peptide Sequence |
|-----------------|-------------|---------------|-----------------|----------------|--------|--------|------------|-----------------------|------------------|
| 0.9712          | IPI00011217 | 1             | 1               | NDUFS4         | 2441   | 2+     | -0.0144    | 0.9983                | K.NGWSYDIEER.K   |

### Peptide Details

#### SHOW MODIFICATIONS -

|              |           |                |         |          |                                                                                       |
|--------------|-----------|----------------|---------|----------|---------------------------------------------------------------------------------------|
| Scan         | 2441      | Delta Mass     | -0.0144 | Protein  | IPI00011217                                                                           |
| Mass         | 1266.5540 | Next           | 274.000 | Fraction | VF_T13h_band06.mzXML                                                                  |
| Hyper        | 428.000   | PeptideProphet | 1.00    | Run      | VF_T13h_band06.pep.xml (Vitor/VF_T13h_band06 (VF_SILAC_AssimrWindow_NewPL_4da_Human)) |
| Protein Hits | 1         | Ion Percent    | 83%     |          |                                                                                       |
| Charge       | 2+        | B              | 1.000   |          |                                                                                       |

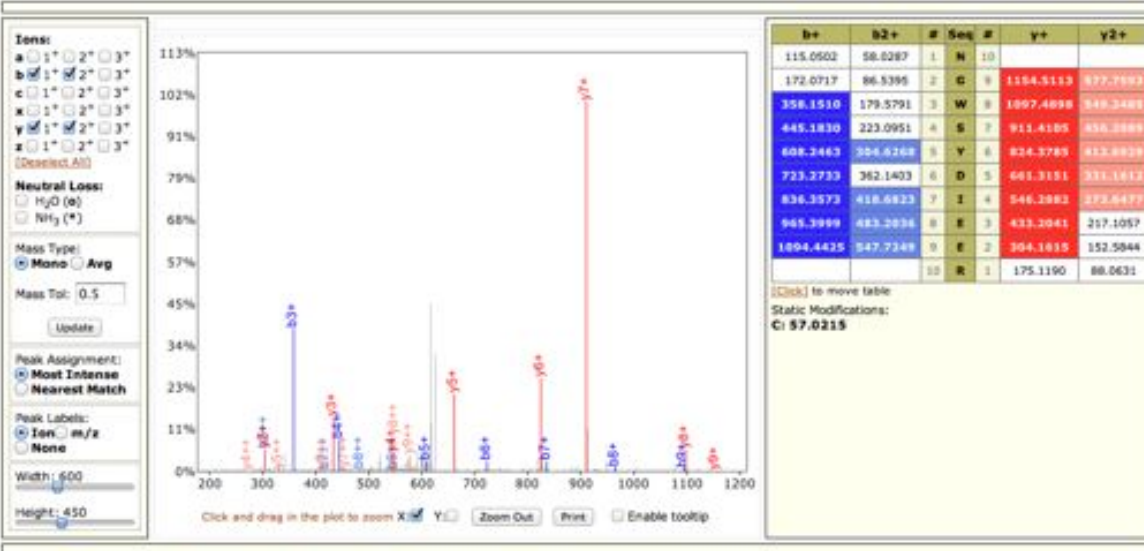

| Protein Probab. | Protein                     | Tot. Peptides | Unique Peptides | Best Gene Name | Scan # | Charge | Delta Mass | Peptide Prophet Score | Peptide Sequence  |
|-----------------|-----------------------------|---------------|-----------------|----------------|--------|--------|------------|-----------------------|-------------------|
| 0.9695          | IPI00908950,<br>IPI00215719 | 1             | 1               | -,<br>RPL18    | 2442   | 2+     | -0.0143    | 0.9984                | K.TAVVVGITDDV.R.V |

### Peptide Details

**Peptide Details**

SHOW MODIFICATIONS

|                 |                      |                                                                                            |
|-----------------|----------------------|--------------------------------------------------------------------------------------------|
| Scan: 2442      | Delta Mass: -0.0143  | Protein: IPI00215719                                                                       |
| Mass: 1345.7320 | Next: 368.000        | Fraction: VF_T13h_band03.mz006                                                             |
| Hydr: 496.000   | PeptideProphet: 1.00 | Run: VF_T13h_band03.pep.xml (Vitor/VF_T13h_band03<br>VF_SILAC_AssmtWindow_NewPL_4da_Human) |
| Protein Hits: 2 | Ion Percent: 83%     |                                                                                            |
| Charge: 2+      | B: 1.000             |                                                                                            |

  

**Ions:**

1+  2+  3+  
 1+  2+  3+  
 1+  2+  3+  
 1+  2+  3+  
 1+  2+  3+  
 1+  2+  3+

**Neutral Loss:**

H<sub>2</sub>O (0)  
 NH<sub>3</sub> (\*)

**Mass Type:**

Mono  Avg

Mass Tol: 0.5

**Peak Assignment:**

Most Intense  
 Nearest Match

**Peak Labels:**

Ion\_m/z  
 None

Width: 600

Height: 450

| b+        | b2+      | #  | Seq | #  | y+        | y2+      |
|-----------|----------|----|-----|----|-----------|----------|
| 102.0550  | 51.5311  | 1  | T   | 13 |           |          |
| 173.0921  | 87.0497  | 2  | A   | 13 | 1244.6845 | 833.8438 |
| 272.1609  | 136.5839 | 3  | V   | 11 | 1173.6474 | 587.3273 |
| 371.2289  | 186.1181 | 4  | V   | 10 | 1074.5790 | 537.7931 |
| 470.2973  | 235.6523 | 5  | V   | 9  | 975.5106  | 488.2588 |
| 527.3188  | 264.1630 | 6  | G   | 8  | 876.4421  | 438.7247 |
| 626.3665  | 314.6968 | 7  | T   | 7  | 819.4207  | 410.2100 |
| 741.4505  | 371.2388 | 8  | E   | 6  | 718.3730  | 359.6901 |
| 842.4982  | 421.7827 | 9  | T   | 5  | 665.3989  | 303.1493 |
| 987.8281  | 479.2662 | 10 | D   | 4  | 584.2413  | 252.6243 |
| 1072.5521 | 536.7797 | 11 | D   | 3  | 380.2143  | 195.1108 |
| 1171.6205 | 586.3130 | 12 | V   | 2  | 374.1874  | 137.5973 |
|           |          | 13 | R   | 1  | 175.1190  | 88.0631  |

to move table

Static Modifications:  
C: 57.0215

Click and drag in the plot to zoom X:50 Y:1    Enable tooltip

| Protein Probab. | Protein     | Tot. Peptides | Unique Peptides | Best Gene Name | Scan # | Charge | Delta Mass | Peptide Prophet Score | Peptide Sequence |
|-----------------|-------------|---------------|-----------------|----------------|--------|--------|------------|-----------------------|------------------|
| 0.9775          | IP100024619 | 1             | 1               | C16orf61       | 2444   | 2+     | -0.0136    | 0.9989                | K.FFGYCNDVDR.E   |

### Peptide Details

#### SHOW MODIFICATIONS -

|                 |                      |                                                   |
|-----------------|----------------------|---------------------------------------------------|
| Scan: 2444      | Delta Mass: -0.0136  | Protein: IP100024619                              |
| Mass: 1292.5360 | Next: 270.000        | Fraction: VF_T13h_band06.mzXML                    |
| Hyper: 439.000  | PeptideProphet: 1.00 | Run: VF_T13h_band06.pep.xml (Vitor/VF_T13h_band06 |
| Protein Hits: 1 | Ion Percent: 89%     | (VF_SILAC_Assmt/Window_NewPl_4da_Human)           |
| Charge: 2+      | B: 1.000             |                                                   |

#### Ions:

- 1<sup>+</sup>  2<sup>+</sup>  3<sup>+</sup>  
 1<sup>+</sup>  2<sup>+</sup>  3<sup>+</sup>

[Deselect All]

#### Neutral Loss:

- H<sub>2</sub>O (a)  
 NH<sub>3</sub> (\*)

#### Mass Type:

- Mono  Avg

Mass Tol: 0.5

[Update]

#### Peak Assignment:

- Most Intense  Nearest Match

#### Peak Labels:

- Ion<sub>m/z</sub>  None

Width: 600

Height: 450

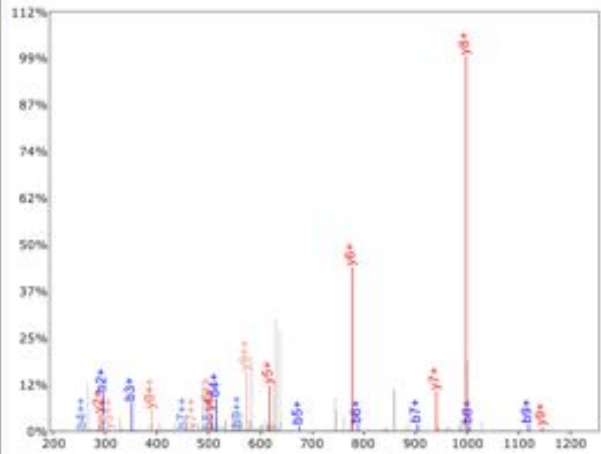

Click and drag in the plot to zoom X: [input type="text" value="200"] Y: [input type="text" value="0%] [Zoom Out] [Print] [Enable tooltip]

| b+        | b2+      | #  | Seq # | y+        | y2+      |
|-----------|----------|----|-------|-----------|----------|
| 148.0757  | 74.5415  | 1  | F 10  |           |          |
| 295.1441  | 148.0757 | 2  | F 9   | 1145.4681 | 573.3377 |
| 392.1854  | 176.5864 | 3  | C 8   | 998.3997  | 499.7658 |
| 515.3289  | 258.1161 | 4  | V 7   | 941.3793  | 473.1627 |
| 675.3994  | 338.1334 | 5  | C 6   | 778.3149  | 389.6411 |
| 789.3025  | 395.1549 | 6  | N 5   | 618.2843  | 309.6457 |
| 904.3295  | 452.6884 | 7  | D 4   | 504.2413  | 252.6243 |
| 1003.3979 | 503.3028 | 8  | V 3   | 389.3143  | 195.1108 |
| 1118.4248 | 559.7160 | 9  | D 2   | 295.1459  | 145.5766 |
|           |          | 10 | B 1   | 175.1190  | 88.0631  |

[Click] to move table

Static Modifications:

C: 57.0215

| Protein Probab. | Protein                     | Tot. Peptides | Unique Peptides | Best Gene Name | Scan # | Charge | Delta Mass | Peptide Prophet Score | Peptide Sequence   |
|-----------------|-----------------------------|---------------|-----------------|----------------|--------|--------|------------|-----------------------|--------------------|
| 0.9881          | IPI00021794,<br>IPI00640525 | 1             | 1               | CTSA,<br>PPGB  | 2446   | 2+     | -0.0166    | 0.9999                | K.YGDSGSEQIAGFVK.E |

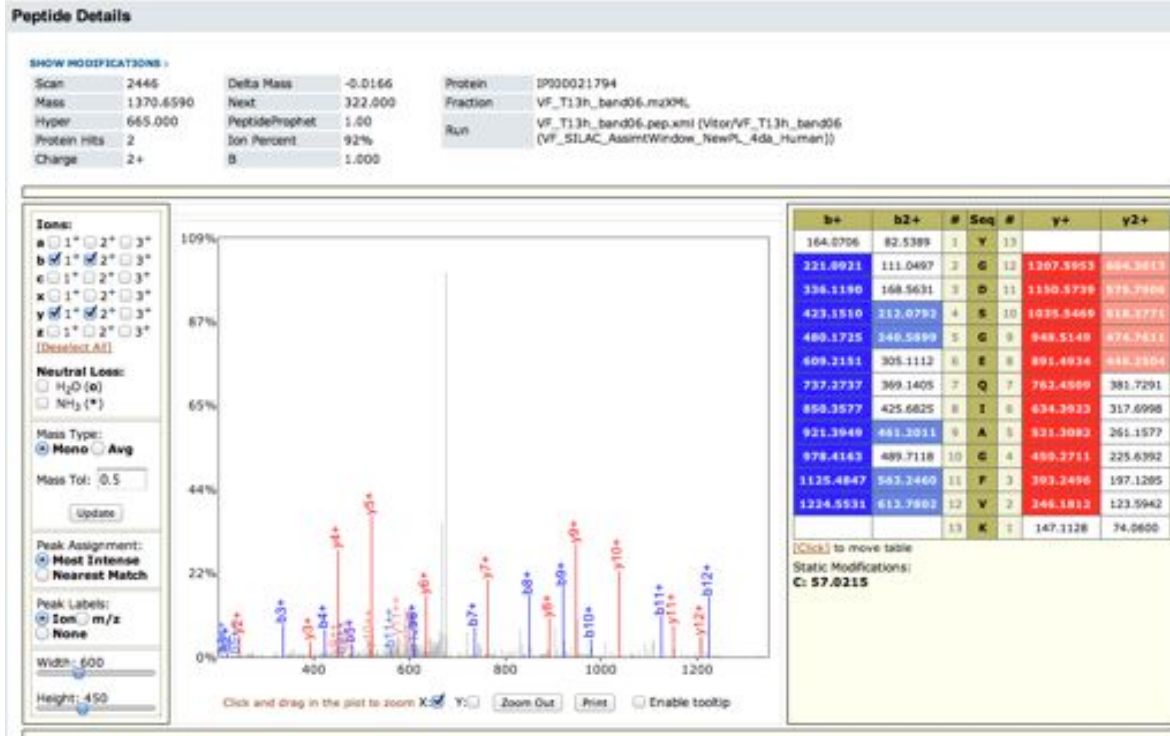

| Protein Probab. | Protein                                                                     | Tot. Peptides | Unique Peptides | Best Gene Name                                | Scan # | Charge | Delta Mass | Peptide Prophet Score | Peptide Sequence    |
|-----------------|-----------------------------------------------------------------------------|---------------|-----------------|-----------------------------------------------|--------|--------|------------|-----------------------|---------------------|
| 0.9810          | IP100796250,<br>IP100794986,<br>IP100217906,<br>IP100748145,<br>IP100465121 | 1             | 1               | GNAI2,<br>GNAI2,<br>GNAI2,<br>GNAI2,<br>GNAI2 | 2452   | 2+     | -0.0184    | 0.9999                | R.IAQSDYIPTQQDVLR.T |

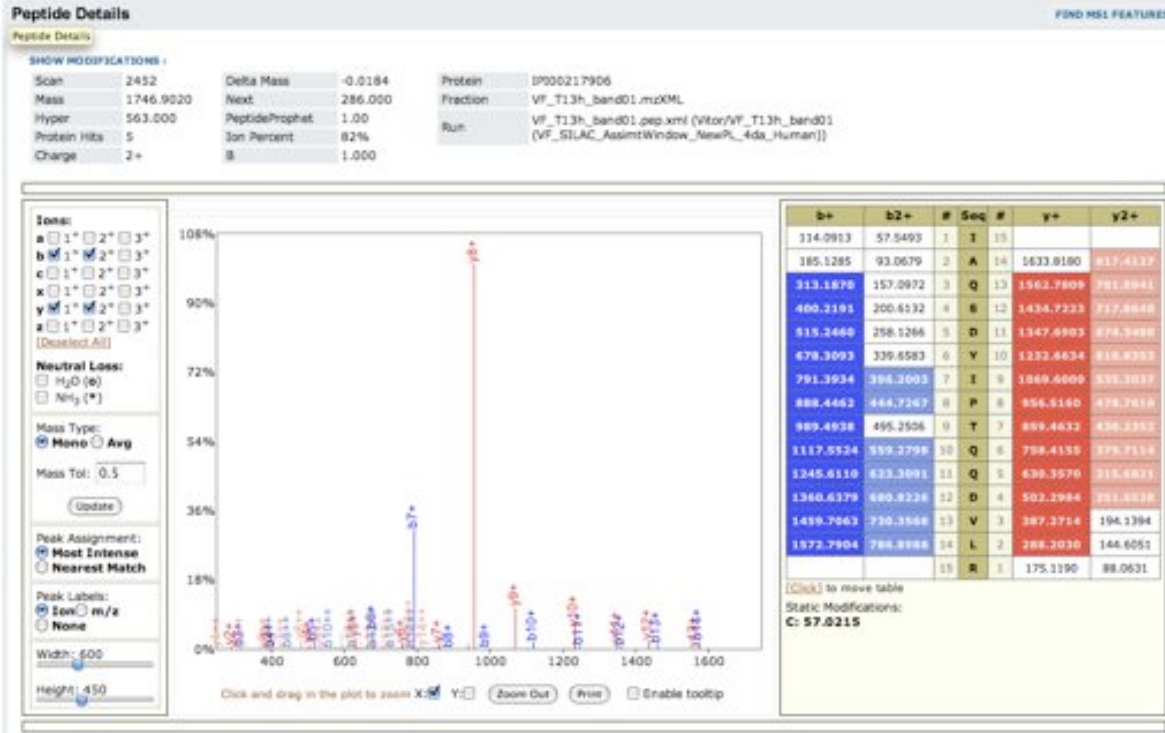

| Protein Probab. | Protein     | Tot. Peptides | Unique Peptides | Best Gene Name | Scan # | Charge | Delta Mass | Peptide Prophet Score | Peptide Sequence     |
|-----------------|-------------|---------------|-----------------|----------------|--------|--------|------------|-----------------------|----------------------|
| 0.8237          | IPI00100796 | 1             | 1               | CHMP5          | 2463   | 2+     | +0.9838    | 0.9870                | K.APPPSLTDCIGTVDSR.A |

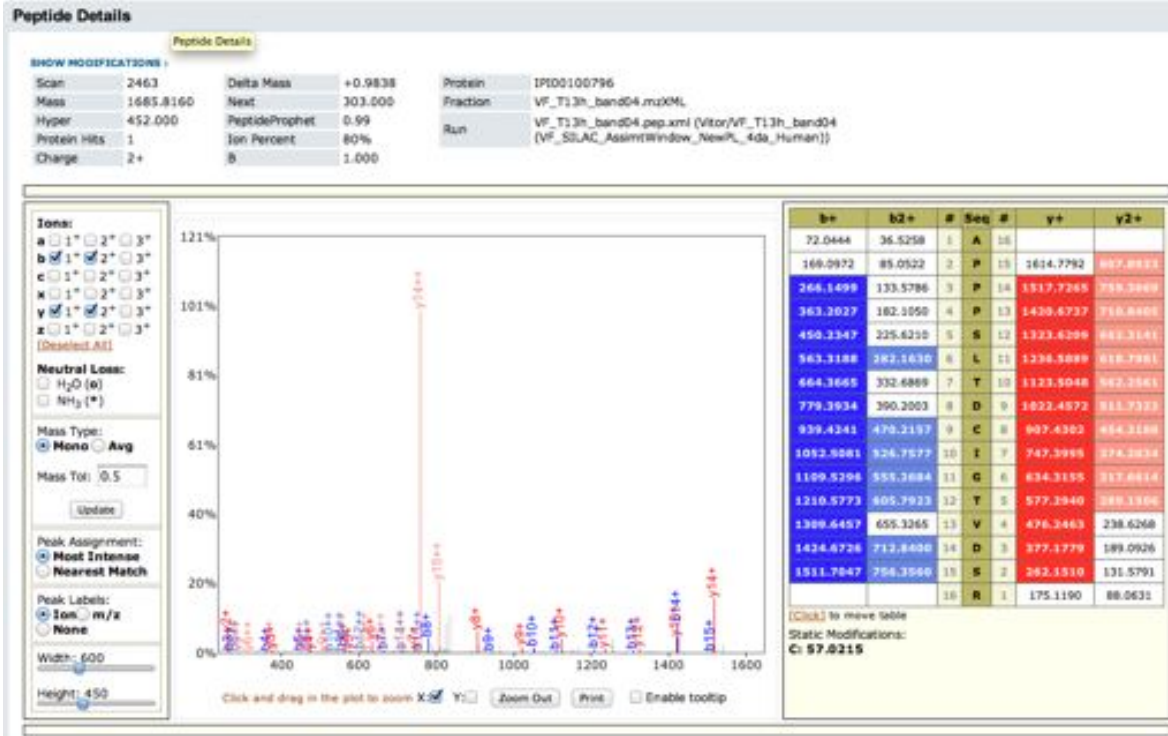

| Protein Probab. | Protein     | Tot. Peptides | Unique Peptides | Best Gene Name | Scan # | Charge | Delta Mass | Peptide Prophet Score | Peptide Sequence   |
|-----------------|-------------|---------------|-----------------|----------------|--------|--------|------------|-----------------------|--------------------|
| 0.9828          | IP100293533 | 1             | 1               | NUP62          | 2475   | 2+     | -0.0246    | 0.9994                | R.HFLQQATQVNAWDR.T |

### Peptide Details

#### SHOW MODIFICATIONS

|              |           |                 |         |          |                                                                                      |
|--------------|-----------|-----------------|---------|----------|--------------------------------------------------------------------------------------|
| Scan         | 2475      | Delta Mass      | -0.0246 | Protein  | IP100293533                                                                          |
| Mass         | 1713.8460 | Next            | 237.000 | Fraction | VF_T13h_band06.mzXML                                                                 |
| Hyper        | 433.000   | Peptide/Prophet | 1.00    | Run      | VF_T13h_band06.pep.xml (Vitor/VF_T13h_band06 (VF_SILAC_AssimWindow_NewPL_4da_Human)) |
| Protein Hits | 1         | Ion Percent     | 92%     |          |                                                                                      |
| Charge       | 2+        | B               | 1.000   |          |                                                                                      |

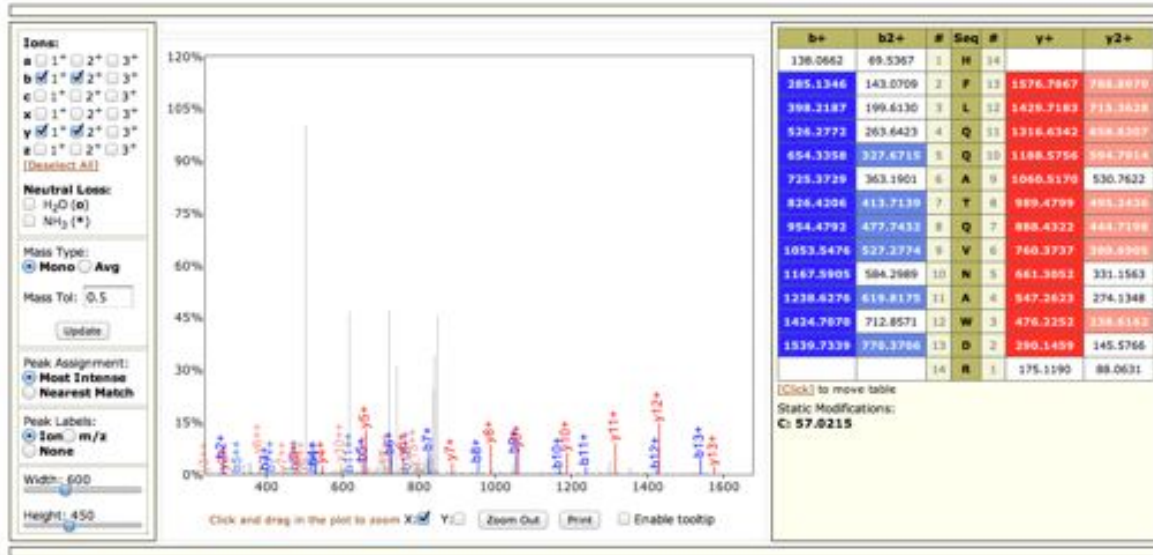

| Protein Probab. | Protein     | Tot. Peptides | Unique Peptides | Best Gene Name | Scan # | Charge | Delta Mass | Peptide Prophet Score | Peptide Sequence   |
|-----------------|-------------|---------------|-----------------|----------------|--------|--------|------------|-----------------------|--------------------|
| 0.9733          | IPI00293533 | 1             | 1               | NUP62          | 2483   | 2+     | -0.0222    | 0.9988                | R.HFLQQATQVNAWDR.T |

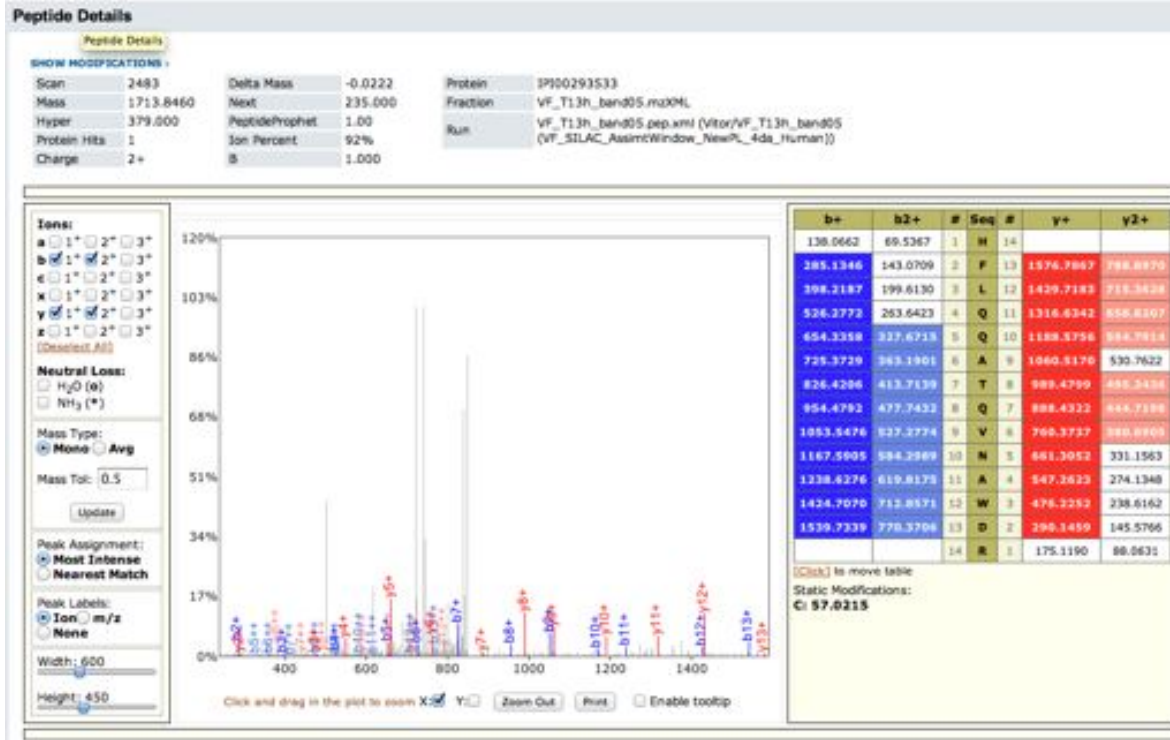



| Protein Probab. | Protein                                                                                                     | Tot. Peptides | Unique Peptides | Best Gene Name                                                          | Scan# | Charge | Delta Mass | Peptide Prophet Score | Peptide Sequence |
|-----------------|-------------------------------------------------------------------------------------------------------------|---------------|-----------------|-------------------------------------------------------------------------|-------|--------|------------|-----------------------|------------------|
| 0.9234          | IPI00879638,<br>IPI00798375,<br>IPI00017617,<br>IPI00651653,<br>IPI00651677,<br>IPI00889541,<br>IPI00023785 | 1             | 1               | DDX17,<br>DDX5,<br>DDX5,<br>DDX17,<br>DKFZp761H2016,<br>DDX17,<br>DDX17 | 2484  | 2+     | -0.0116    | 0.9963                | K.APILIATDVASR.G |

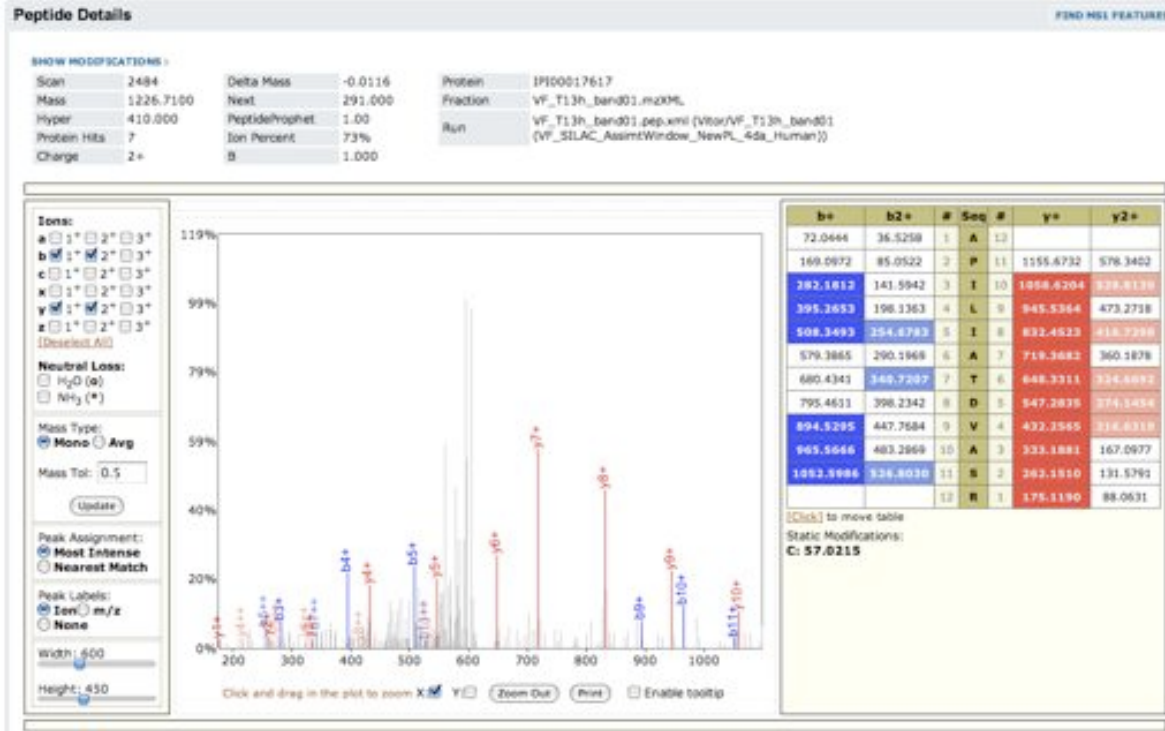

| Protein Probab. | Protein                                                                                     | Tot. Peptides | Unique Peptides | Best Gene Name                                    | Scan # | Charge | Delta Mass | Peptide Prophet Score | Peptide Sequence  |
|-----------------|---------------------------------------------------------------------------------------------|---------------|-----------------|---------------------------------------------------|--------|--------|------------|-----------------------|-------------------|
| 0.8236          | IPI00795286,<br>IPI00795693,<br>IPI00181409,<br>IPI00873716,<br>IPI00791301,<br>IPI00030131 | 1             | 1               | TMPO,<br>TMPO,<br>TMPO,<br>TMPO,<br>TMPO,<br>TMPO | 2515   | 2+     | -0.0140    | 0.9841                | K.GAAGRPLELSDFR.M |

Peptide Details

SHOW MODIFICATIONS -

|              |           |                |         |          |                                                                                         |
|--------------|-----------|----------------|---------|----------|-----------------------------------------------------------------------------------------|
| Scan         | 2515      | Delta Mass     | -0.0140 | Protein  | IPI00030131                                                                             |
| Mass         | 1388.7280 | Next           | 251.000 | Fraction | VF_T13h_band05.mzXML                                                                    |
| Hyper        | 335.000   | PeptideProphet | 0.98    | Run      | VF_T13h_band05.pep.xml (Vitor/VF_T13h_band05<br>[VF_SILAC_AssimWindow_NewPL_4da_Human]) |
| Protein Hits | 6         | Ion Percent    | 67%     |          |                                                                                         |
| Charge       | 2+        | B              | 1.000   |          |                                                                                         |

- Ions:**
- a 1+  2+  3+
  - b 1+  2+  3+
  - c 1+  2+  3+
  - x 1+  2+  3+
  - y 1+  2+  3+
  - z 1+  2+  3+

- Neutral Loss:**
- H<sub>2</sub>O (\*)
  - NH<sub>3</sub> (\*)

Mass Type:  
 Mono  Avg

Mass Tol: 0.5

Update

- Peak Assignment:**
- Most Intense
  - Nearest Match

- Peak Labels:**
- Ion / m/z
  - None

Width: 600

Height: 450

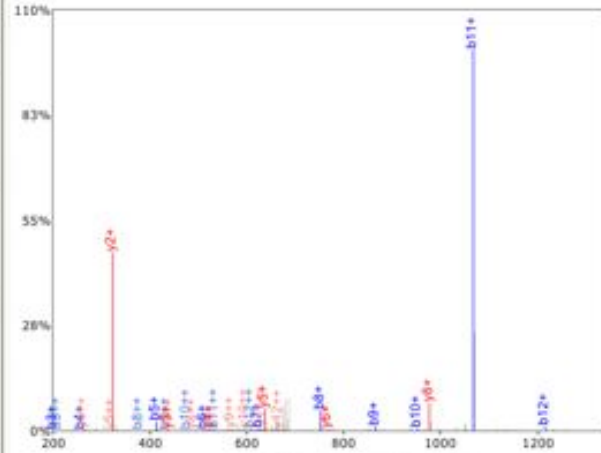

| b+        | b2+      | #  | Seq # | y+        | y2+      |
|-----------|----------|----|-------|-----------|----------|
| 58.0287   | 29.5180  | 1  | G 13  |           |          |
| 129.0659  | 65.0366  | 2  | A 12  | 1331.7066 | 666.3379 |
| 200.1036  | 100.5551 | 3  | A 11  | 1260.6695 | 638.8384 |
| 257.1244  | 129.0659 | 4  | G 10  | 1189.6324 | 585.3198 |
| 413.2255  | 207.1164 | 5  | R 9   | 1132.6109 | 588.8991 |
| 610.2793  | 305.6420 | 6  | P 8   | 976.5088  | 488.7988 |
| 623.3624  | 312.1848 | 7  | L 7   | 879.4571  | 449.3332 |
| 752.4050  | 376.2025 | 8  | E 6   | 766.3720  | 383.6001 |
| 865.4890  | 433.2483 | 9  | L 5   | 637.3304  | 318.1688 |
| 982.5211  | 496.2662 | 10 | B 4   | 524.2463  | 282.8288 |
| 1067.5480 | 534.2776 | 11 | D 3   | 437.2143  | 219.1108 |
| 1224.6164 | 607.8118 | 12 | F 2   | 322.1874  | 161.5973 |
|           |          | 13 | R 1   | 175.1190  | 88.0631  |

[Click] to move table  
Static Modifications:  
C: 57.0215

| Protein Probab. | Protein                     | Tot. Peptides | Unique Peptides | Best Gene Name      | Scan # | Charge | Delta Mass | Peptide Prophet Score | Peptide Sequence   |
|-----------------|-----------------------------|---------------|-----------------|---------------------|--------|--------|------------|-----------------------|--------------------|
| 0.9643          | IPI00807609,<br>IPI00033466 | 1             | 1               | CLEC11A,<br>CLEC11A | 2516   | 2+     | -0.0071    | 0.9990                | R.LAGLDAGLHQLHVR.L |

### Peptide Details

#### SHOW MODIFICATIONS

|              |           |                |         |          |                                                                                      |
|--------------|-----------|----------------|---------|----------|--------------------------------------------------------------------------------------|
| Scan         | 2516      | Delta Mass     | -0.0071 | Protein  | IPI00033466                                                                          |
| Mass         | 1499.8441 | Next           | 234.000 | Fraction | VF_T13h_band02.mzXML                                                                 |
| Hyper        | 392.000   | PeptideProphet | 1.00    | Run      | VF_T13h_band02.dsq.xml (Vitor/VF_T13h_band02 (VF_SILAC_AssmtWindow_NewPL_4ds_Human)) |
| Protein Hits | 2         | Ion Percent    | 85%     |          |                                                                                      |
| Charge       | 2+        | B              | 1.000   |          |                                                                                      |

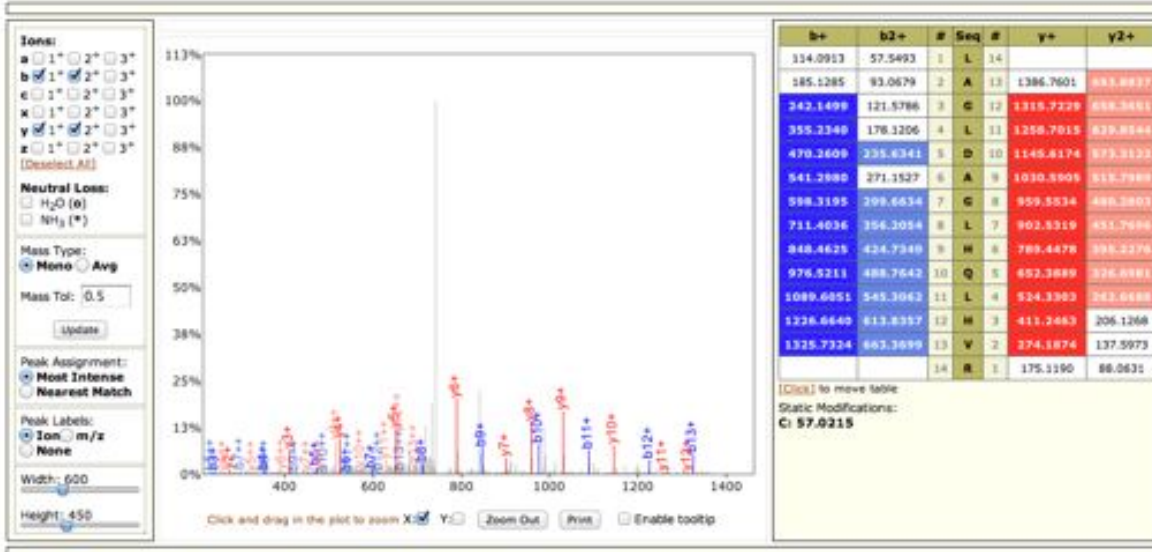

| Protein Probab. | Protein     | Tot. Peptides | Unique Peptides | Best Gene Name | Scan # | Charge | Delta Mass | Peptide Prophet Score | Peptide Sequence          |
|-----------------|-------------|---------------|-----------------|----------------|--------|--------|------------|-----------------------|---------------------------|
| 0.9837          | IPI00031651 | 1             | 1               | FP15621        | 2523   | 2+     | -0.0232    | 0.9999                | K.GEAVLRPGLDAEPELSPEEQR.V |

**Peptide Details** [Google Maps](http://maps.google.com/)

SHOW MODIFICATIONS

|              |           |                 |         |          |                                                                                      |
|--------------|-----------|-----------------|---------|----------|--------------------------------------------------------------------------------------|
| Scan         | 2523      | Delta Mass      | -0.0232 | Protein  | IPI00031651                                                                          |
| Mass         | 2292.1470 | Next            | 279.000 | Fraction | VF_T13h_band04.mzXML                                                                 |
| Hyper        | 570.000   | Peptide/Prophet | 1.00    | Run      | VF_T13h_band04.pep.xml (Vitor/VF_T13h_band04 (VF_SILAC_AssimWindow_NewPL_4da_Human)) |
| Protein Hits | 1         | Ion Percent     | 63%     |          |                                                                                      |
| Charge       | 2+        | B               | 1.000   |          |                                                                                      |

**Ions:**

1+  2+  3+

1+  2+  3+

1+  2+  3+

1+  2+  3+

1+  2+  3+

1+  2+  3+

[\[Deselect All\]](#)

**Neutral Loss:**

H<sub>2</sub>O (0)

NH<sub>3</sub> (\*)

**Mass Type:**

Mono  Avg

Mass Tol: 0.5

[Update](#)

**Peak Assignment:**

Most Intense  Nearest Match

**Peak Labels:**

Ion  m/z  None

Width: 500

Height: 450

Click and drag in the plot to zoom. X: Y: [Zoom Out](#) [Print](#)  Enable tooltip

| b+        | b2+       | #  | Seq | #  | y+        | y2+       |
|-----------|-----------|----|-----|----|-----------|-----------|
| 58.0287   | 29.5180   | 1  | C   | 21 |           |           |
| 187.0713  | 94.0393   | 3  | E   | 20 | 2235.1252 | 1118.0662 |
| 258.1084  | 129.5579  | 3  | A   | 19 | 2106.0826 | 1053.3448 |
| 357.1769  | 179.0921  | 4  | V   | 18 | 2035.0455 | 1018.0184 |
| 470.2609  | 235.6341  | 5  | L   | 17 | 1935.9770 | 968.4823  |
| 636.3628  | 313.6847  | 6  | R   | 16 | 1822.8930 | 911.9503  |
| 723.4148  | 362.2110  | 7  | P   | 15 | 1664.7919 | 833.9996  |
| 780.4363  | 390.7216  | 8  | C   | 14 | 1569.7391 | 785.3732  |
| 893.5203  | 447.2638  | 9  | L   | 13 | 1512.7178 | 756.8625  |
| 1008.5473 | 504.7773  | 10 | D   | 12 | 1399.6336 | 700.3204  |
| 1079.5844 | 540.2858  | 11 | A   | 11 | 1284.6064 | 643.8078  |
| 1208.6270 | 604.8171  | 12 | E   | 10 | 1213.5695 | 607.2884  |
| 1305.6797 | 653.3435  | 13 | P   | 9  | 1084.5269 | 542.7671  |
| 1434.7223 | 717.8648  | 14 | E   | 8  | 987.4742  | 494.2407  |
| 1547.8064 | 774.4068  | 15 | L   | 7  | 898.4216  | 429.7194  |
| 1634.8384 | 817.9229  | 16 | S   | 6  | 749.3475  | 373.1774  |
| 1731.8912 | 864.4492  | 17 | P   | 5  | 688.3155  | 329.6604  |
| 1860.9338 | 930.9705  | 18 | E   | 4  | 561.2827  | 281.1350  |
| 1989.9764 | 995.4918  | 19 | E   | 3  | 432.2501  | 216.6137  |
| 2118.0390 | 1059.5211 | 20 | Q   | 2  | 303.1775  | 152.0924  |
|           |           | 21 | R   | 1  | 175.1390  | 88.0631   |

[\[Check\]](#) to move table

Static Modifications:

**C: 57.0215**



| Protein Probab. | Protein                                                                                                     | Tot. Peptides | Unique Peptides | Best Gene Name                                            | Scan # | Charge | Delta Mass | Peptide Prophet Score | Peptide Sequence   |
|-----------------|-------------------------------------------------------------------------------------------------------------|---------------|-----------------|-----------------------------------------------------------|--------|--------|------------|-----------------------|--------------------|
| 0.8759          | IPI00793922,<br>IPI00747273,<br>IPI00789134,<br>IPI00797221,<br>IPI00795257,<br>IPI00219018,<br>IPI00788737 | 1             | 1               | GAPDH, -,<br>GAPDH,<br>GAPDH,<br>GAPDH,<br>GAPD,<br>GAPDH | 2532   | 2+     | +1.0000    | 0.9930                | R.VPTANVSVVDLTCR.L |

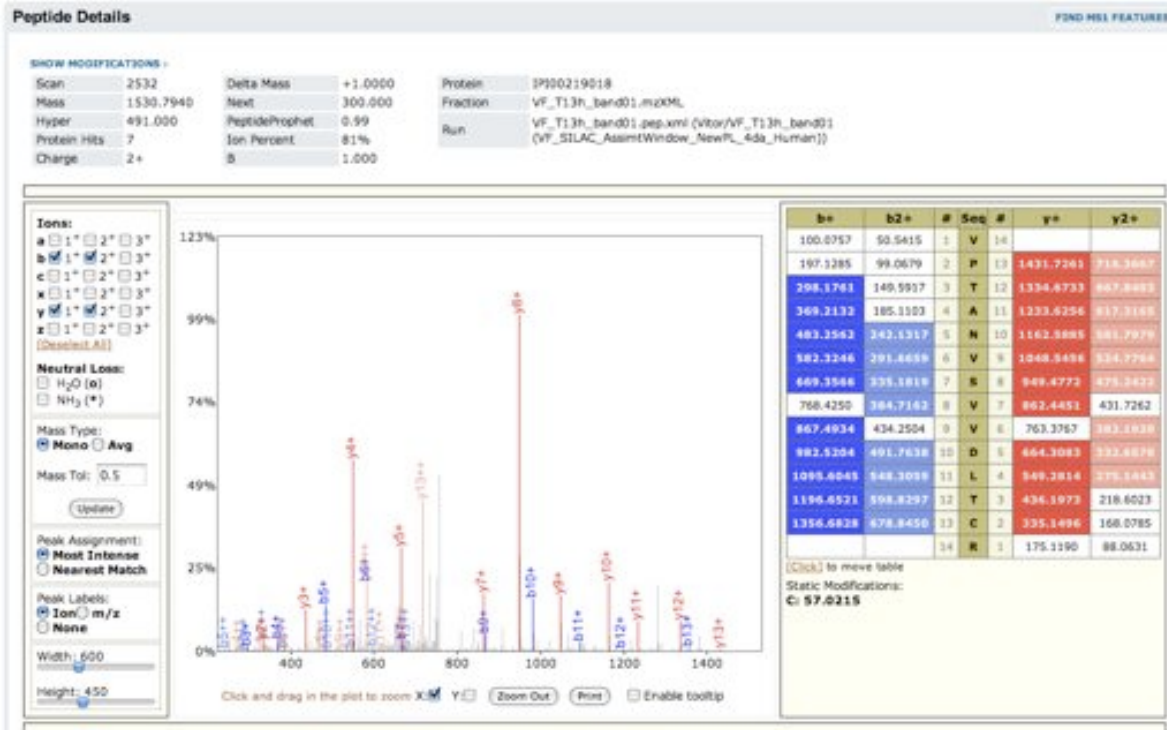

| Protein Probab. | Protein                     | Tot. Peptides | Unique Peptides | Best Gene Name | Scan # | Charge | Delta Mass | Peptide Prophet Score | Peptide Sequence |
|-----------------|-----------------------------|---------------|-----------------|----------------|--------|--------|------------|-----------------------|------------------|
| 0.9759          | IPI00902496,<br>IPI00218922 | 1             | 1               | -,<br>SEC63    | 2537   | 2+     | -0.0119    | 0.9996                | R.VLLLSHLAR.M    |

Peptide Details

FIND MS1 FEATURES

SHOW MODIFICATIONS

|              |           |                |         |          |                                                                                        |
|--------------|-----------|----------------|---------|----------|----------------------------------------------------------------------------------------|
| Scan         | 2537      | Delta Mass     | -0.0119 | Protein  | IPI00218922                                                                            |
| Mass         | 1021.6520 | Next           | 390.000 | Fraction | VF_T13h_band01.mzXML                                                                   |
| Hyper        | 581.000   | PeptideProphet | 1.00    | Run      | VF_T13h_band01.pep.xml (View/VF_T13h_band01<br>(VF_SILAC_AssmtWindow_NewPL_4ds_Human)) |
| Protein Hits | 2         | Ion Percent    | 88%     |          |                                                                                        |
| Charge       | 2+        | B              | 1.000   |          |                                                                                        |

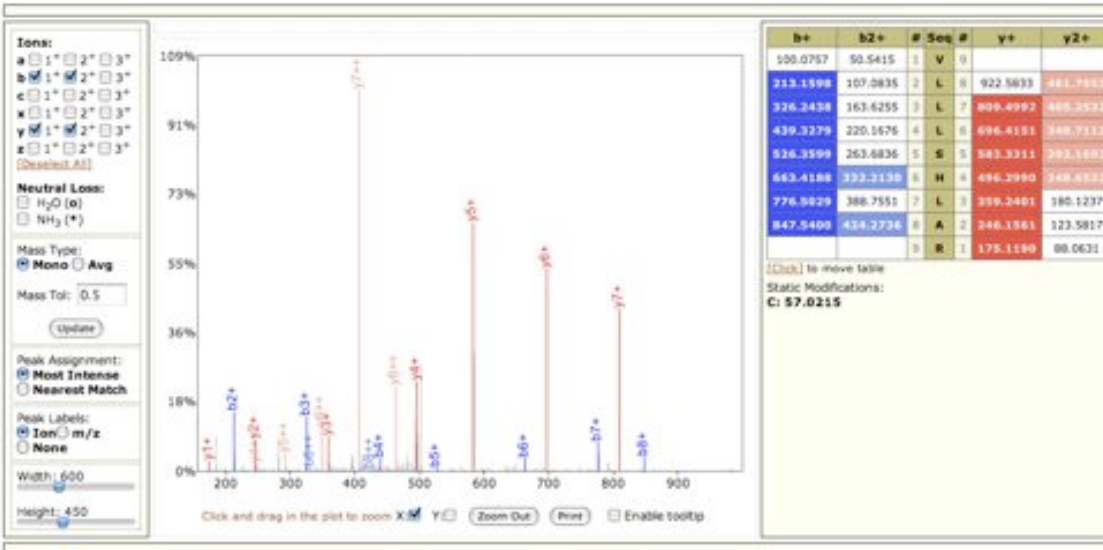

| Protein Probab. | Protein                     | Tot. Peptides | Unique Peptides | Best Gene Name  | Scan # | Charge | Delta Mass | Peptide Prophet Score | Peptide Sequence            |
|-----------------|-----------------------------|---------------|-----------------|-----------------|--------|--------|------------|-----------------------|-----------------------------|
| 0.9881          | IPI00383296,<br>IPI00171903 | 1             | 1               | HNRPM,<br>HNRPM | 2553   | 2+     | -0.0244    | 0.9999                | R.GNFGGSFAGSFGGAGGHAPGVAR.K |

### Peptide Details

#### SHOW MODIFICATIONS

|                 |                      |                                                                                           |
|-----------------|----------------------|-------------------------------------------------------------------------------------------|
| Scan: 2553      | Delta Mass: -0.0244  | Protein: IPI00171903                                                                      |
| Mass: 2034.9530 | Next: 339.000        | Fraction: VF_T13h_band06.mzXML                                                            |
| Hyper: 642.000  | PeptideProphet: 1.00 | Run: VF_T13h_band06.pep.xml (Vior/VF_T13h_band06 (VF_SILAC_AssimtWindow_NewPL_4da_Human)) |
| Protein Hits: 2 | Ion Percent: 84%     |                                                                                           |
| Charge: 2+      | B: 1.000             |                                                                                           |

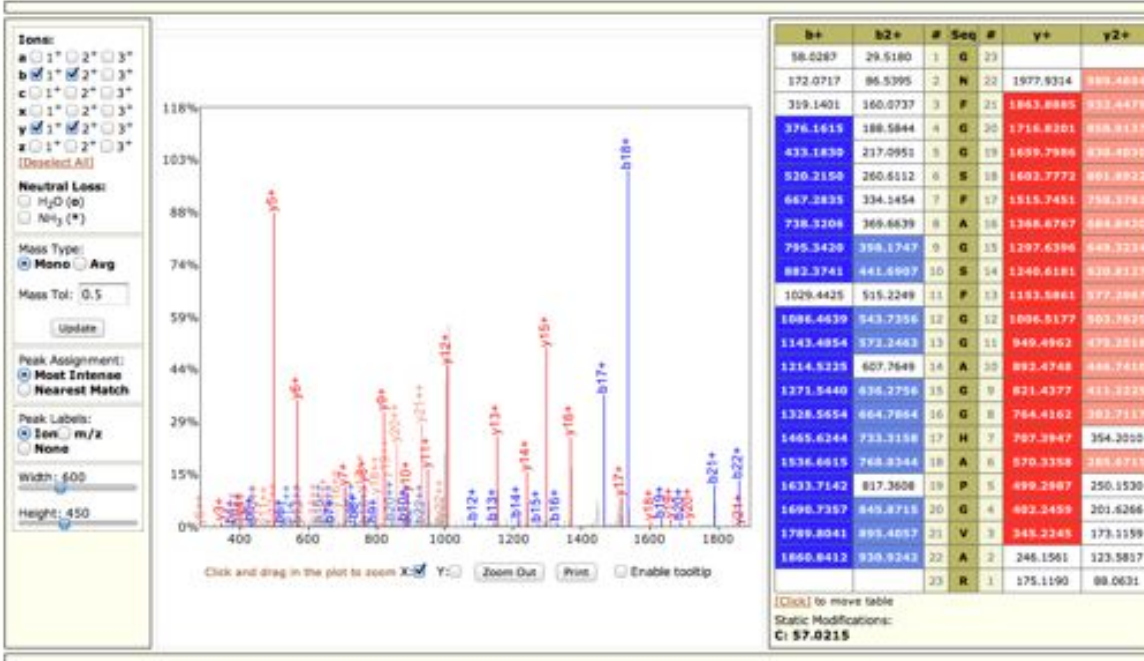



| Protein Probab. | Protein                                     | Tot. Peptides | Unique Peptides | Best Gene Name                     | Scan# | Charge | Delta Mass | Peptide Prophet Score | Peptide Sequence  |
|-----------------|---------------------------------------------|---------------|-----------------|------------------------------------|-------|--------|------------|-----------------------|-------------------|
| 0.9639          | IPI00302850,<br>IPI00889157,<br>IPI00903286 | 1             | 1               | SNRPD1,<br>LOC100129492,<br>SNRPD1 | 2554  | 2+     | -0.0174    | 0.9980                | K.NREPVQLETLSIR.G |

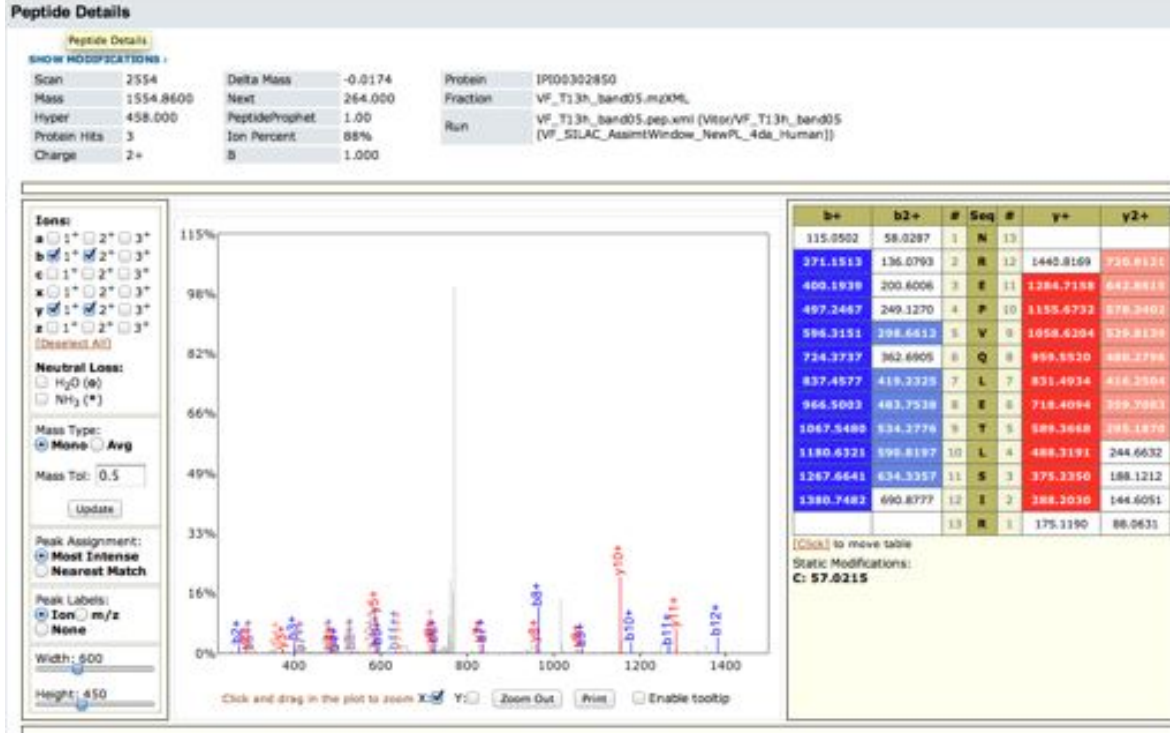



| Protein Probab. | Protein                                                                                                     | Tot. Peptides | Unique Peptides | Best Gene Name                                                          | Scan # | Charge | Delta Mass | Peptide Prophet Score | Peptide Sequence |
|-----------------|-------------------------------------------------------------------------------------------------------------|---------------|-----------------|-------------------------------------------------------------------------|--------|--------|------------|-----------------------|------------------|
| 0.9870          | IPI00879638,<br>IPI00798375,<br>IPI00017617,<br>IPI00651653,<br>IPI00651677,<br>IPI00889541,<br>IPI00023785 | 1             | 1               | DDX17,<br>DDX5,<br>DDX5,<br>DDX17,<br>DKFZp761H2016,<br>DDX17,<br>DDX17 | 2560   | 2+     | -0.0145    | 0.9998                | K.APILIATDVASR.G |

### Peptide Details

SHOW MODIFICATIONS

|              |           |                 |         |          |                                             |
|--------------|-----------|-----------------|---------|----------|---------------------------------------------|
| Scan         | 2560      | Delta Mass      | -0.0145 | Protein  | IPI00017617                                 |
| Mass         | 1226.7100 | Next            | 362.000 | Fraction | VF_T13h_band06.mzXML                        |
| Hyper        | 623.000   | Peptide/Prophet | 1.00    | Run      | VF_T13h_band06.pep.xml (vfor/VF_T13h_band06 |
| Protein Hits | 7         | Ion Percent     | 86%     |          | (VF_SILAC_AssmtWindow_NewPL_4da_Human)}     |
| Charge       | 2+        | B               | 1.000   |          |                                             |

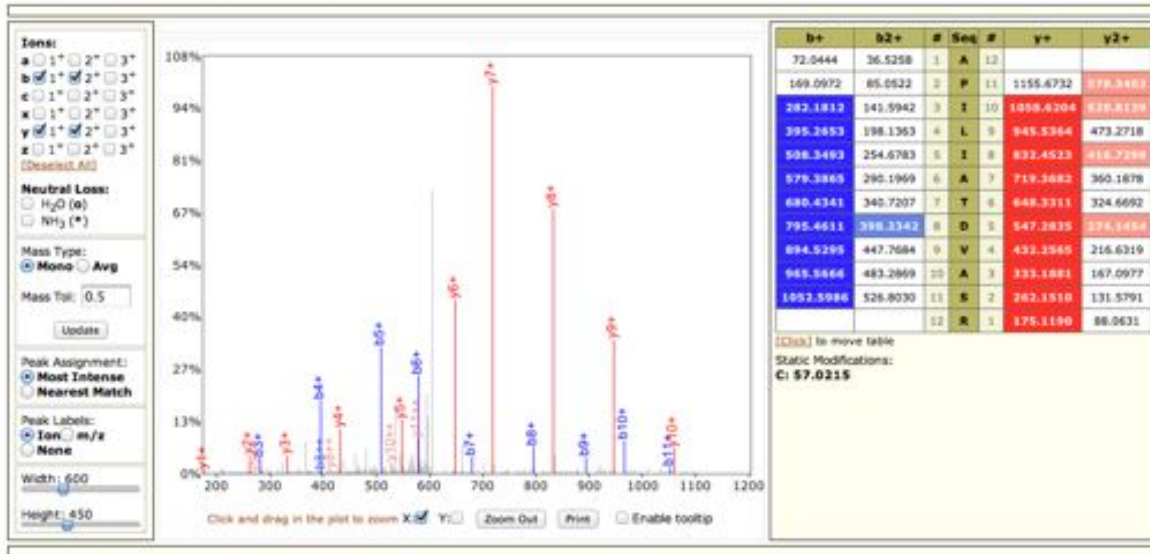

| Protein Probab. | Protein                                                                                                     | Tot. Peptides | Unique Peptides | Best Gene Name                                                          | Scan# | Charge | Delta Mass | Peptide Prophet Score | Peptide Sequence |
|-----------------|-------------------------------------------------------------------------------------------------------------|---------------|-----------------|-------------------------------------------------------------------------|-------|--------|------------|-----------------------|------------------|
| 0.9801          | IPI00879638,<br>IPI00798375,<br>IPI00017617,<br>IPI00651653,<br>IPI00651677,<br>IPI00889541,<br>IPI00023785 | 1             | 1               | DDX17,<br>DDX5,<br>DDX5,<br>DDX17,<br>DKFZp761H2016,<br>DDX17,<br>DDX17 | 2561  | 2+     | -0.0122    | 0.9999                | K.APILIATDVASR.G |

### Peptide Details

#### SHOW MODIFICATIONS :

|              |           |                 |         |          |                                                                                    |
|--------------|-----------|-----------------|---------|----------|------------------------------------------------------------------------------------|
| Scan         | 2561      | Delta Mass      | -0.0122 | Protein  | IPI00017617                                                                        |
| Mass         | 1226.7100 | Next            | 375.000 | Fraction | VF_T13h_band02.mzXML                                                               |
| Hyper        | 661.000   | Peptide/Prophet | 1.00    | Run      | VF_T13h_band02.pep.xml (Mtx/VF_T13h_band02 [VF_SILAC_AssmtWindow_NewPL_4ds_Human]) |
| Protein Hits | 7         | Ion Percent     | 96%     |          |                                                                                    |
| Charge       | 2+        | B               | 1.000   |          |                                                                                    |

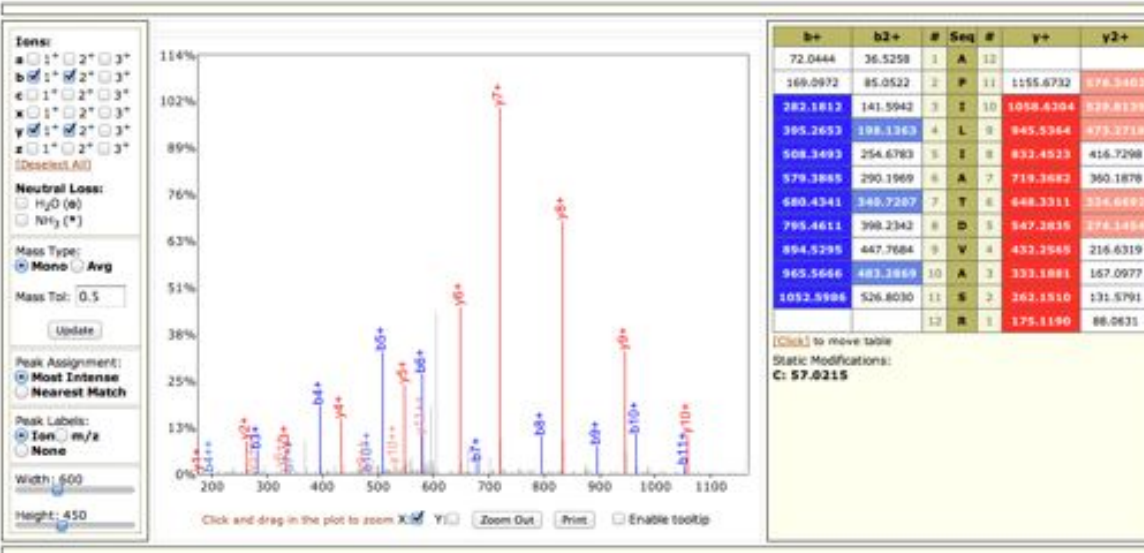

| Protein Probab. | Protein                                                                     | Tot. Peptides | Unique Peptides | Best Gene Name                                    | Scan # | Charge | Delta Mass | Peptide Prophet Score | Peptide Sequence |
|-----------------|-----------------------------------------------------------------------------|---------------|-----------------|---------------------------------------------------|--------|--------|------------|-----------------------|------------------|
| 0.9865          | IPI00220573,<br>IPI00033494,<br>IPI00719669,<br>IPI00604523,<br>IPI00888129 | 1             | 1               | MRLC3,<br>MRLC2,<br>MRLC2,<br>MRCL3,<br>LOC642076 | 2571   | 2+     | -0.0147    | 0.9999                | R.FTDEEVDELYR.E  |

### Peptide Details

#### SHOW MODIFICATIONS

|              |           |                 |         |          |                                                                                     |
|--------------|-----------|-----------------|---------|----------|-------------------------------------------------------------------------------------|
| Scan         | 2571      | Delta Mass      | -0.0147 | Protein  | IPI00033494                                                                         |
| Mass         | 1415.6330 | Next            | 373.000 | Fraction | VF_T13h_band05.mzXML                                                                |
| Hyper        | 601.000   | Peptide/Prophet | 1.00    | Run      | VF_T13h_band05.pep.xml (Vtor/VF_T13h_band05 (VF_SILAC_AssmtWindow_NewPL_4ds_Human)) |
| Protein Hits | 5         | Ion Percent     | 90%     |          |                                                                                     |
| Charge       | 2+        | B               | 1.000   |          |                                                                                     |

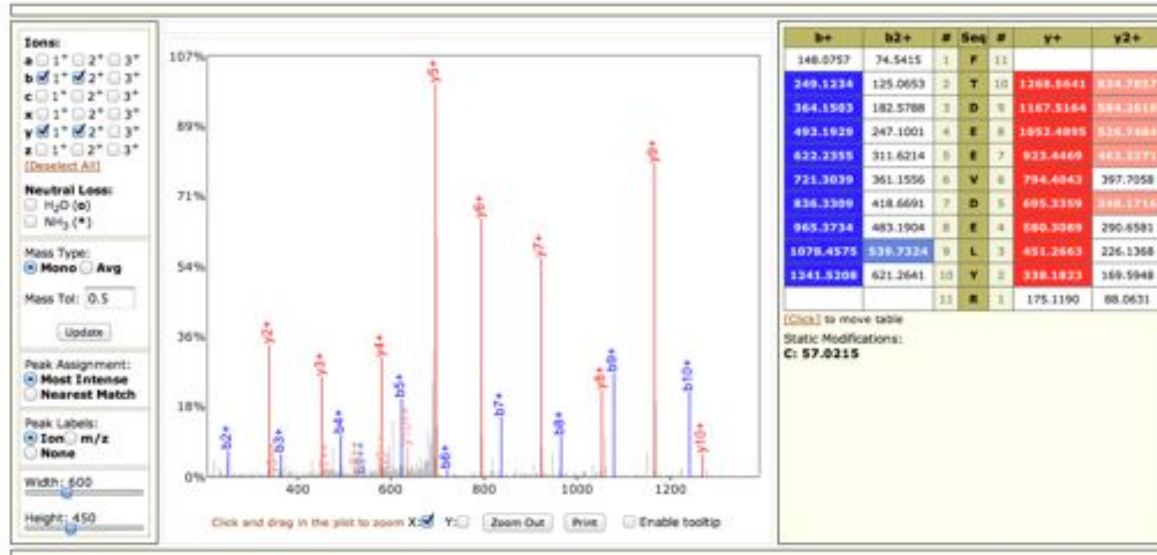

| Protein Probab. | Protein                                                                                                     | Tot. Peptides | Unique Peptides | Best Gene Name                                                              | Scan # | Charge | Delta Mass | Peptide Prophet Score | Peptide Sequence |
|-----------------|-------------------------------------------------------------------------------------------------------------|---------------|-----------------|-----------------------------------------------------------------------------|--------|--------|------------|-----------------------|------------------|
| 0.9804          | IPI00879638,<br>IPI00798375,<br>IPI00017617,<br>IPI00651653,<br>IPI00651677,<br>IPI00889541,<br>IPI00023785 | 1             | 1               | DDX17,<br>DDX5,<br>DDX5,<br>DDX17,<br>DKFZp761<br>H2016,<br>DDX17,<br>DDX17 | 2577   | 2+     | -0.0133    | 0.9994                | K.APILIATDVASR.G |

### Peptide Details

#### SHOW MODIFICATIONS

|              |           |                |         |          |                                                                                         |
|--------------|-----------|----------------|---------|----------|-----------------------------------------------------------------------------------------|
| Scan         | 2577      | Delta Mass     | -0.0133 | Protein  | IPI00017617                                                                             |
| Mass         | 1226.7100 | Next           | 275.000 | Fraction | VF_T13h_band05.mzXML                                                                    |
| Hyper        | 438.000   | PeptideProphet | 1.00    | Run      | VF_T13h_band05 pep.xml (View/VF_T13h_band05<br>(VF_SILAC_AssimtWindow_NewPL_4ds_Human)) |
| Protein Hits | 7         | Ion Percent    | 82%     |          |                                                                                         |
| Charge       | 2+        | B              | 1.000   |          |                                                                                         |

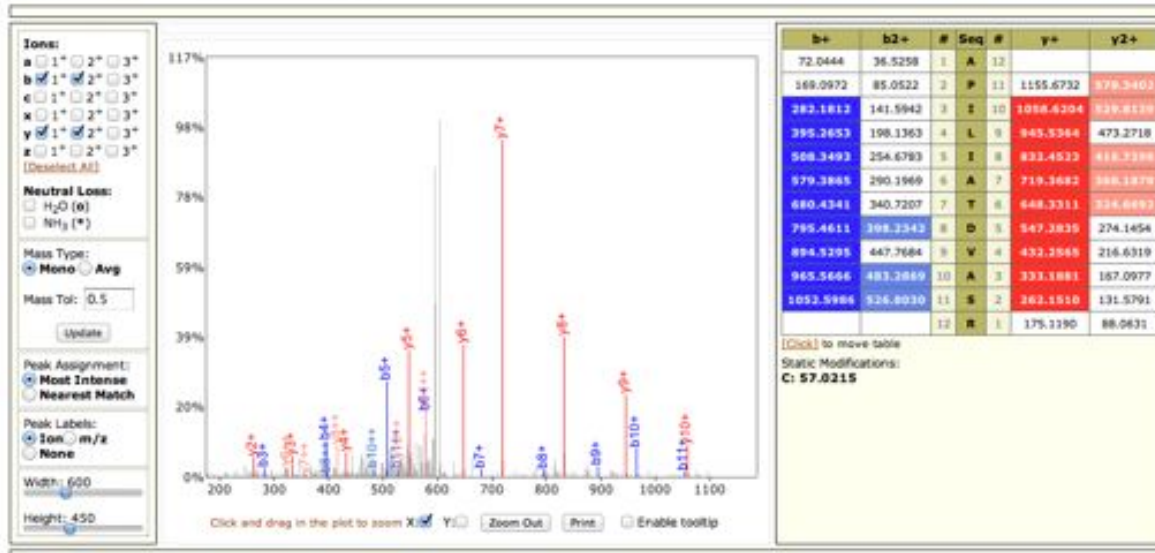

| Protein Probab. | Protein                                                                                     | Tot. Peptides | Unique Peptides | Best Gene Name                                                  | Scan # | Charge | Delta Mass | Peptide Prophet Score | Peptide Sequence   |
|-----------------|---------------------------------------------------------------------------------------------|---------------|-----------------|-----------------------------------------------------------------|--------|--------|------------|-----------------------|--------------------|
| 0.9592          | IPI00893179,<br>IPI00893062,<br>IPI00889791,<br>IPI00644712,<br>IPI00888181,<br>IPI00888013 | 1             | 1               | XRCC6,<br>XRCC6,<br>XRCC6,<br>XRCC6,<br>LOC389901,<br>LOC389901 | 2577   | 2+     | -0.0141    | 0.9987                | R.SDSFENPVLQQHFR.N |

### Peptide Details

#### SHOW MODIFICATIONS

|              |           |                |         |          |                                                                                      |
|--------------|-----------|----------------|---------|----------|--------------------------------------------------------------------------------------|
| Scan         | 2577      | Delta Mass     | -0.0141 | Protein  | IPI00644712                                                                          |
| Mass         | 1703.8140 | Next           | 266.000 | Fraction | VF_T13h_ban002.mzXML                                                                 |
| Hyper        | 415.000   | PeptideProphet | 1.00    | Run      | VF_T13h_ban002.pep.xml (Vitor/VF_T13h_ban002 (VF_SILAC_AssmtWindow_NewPL_4da_Human)) |
| Protein Hits | 6         | Ion Percent    | 81%     |          |                                                                                      |
| Charge       | 2+        | B              | 1.000   |          |                                                                                      |

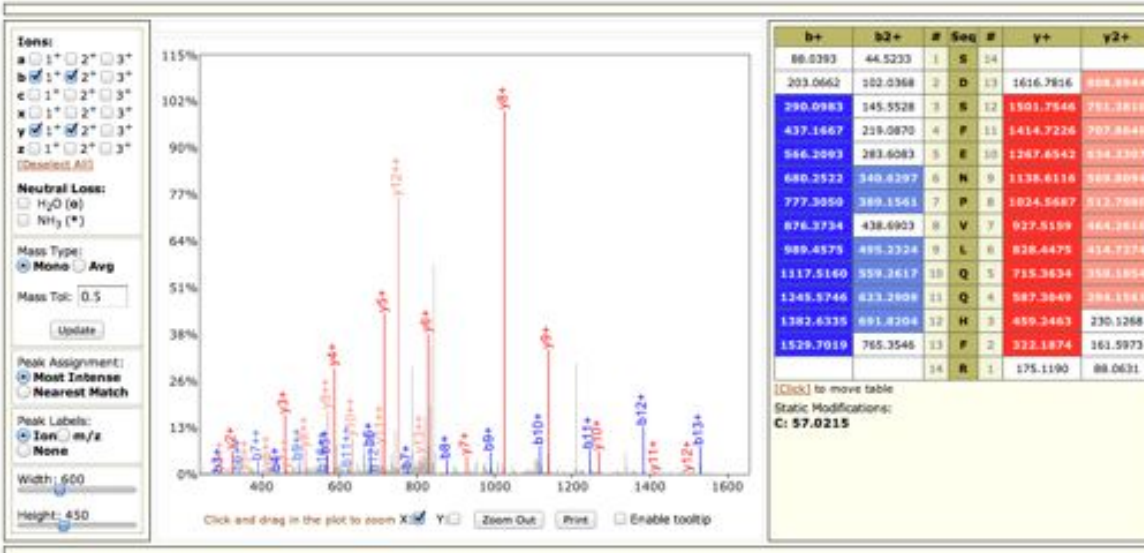

| Protein Probab. | Protein                     | Tot. Peptides | Unique Peptides | Best Gene Name | Scan # | Charge | Delta Mass | Peptide Prophet Score | Peptide Sequence |
|-----------------|-----------------------------|---------------|-----------------|----------------|--------|--------|------------|-----------------------|------------------|
| 0.9721          | IPI00029114,<br>IPI00791262 | 1             | 1               | ICT1,<br>ICT1  | 2578   | 2+     | -0.0148    | 0.9987                | R.LGELILTSESSR.Y |

### Peptide Details

#### SHOW MODIFICATIONS

|              |           |                 |         |          |                                                                                     |
|--------------|-----------|-----------------|---------|----------|-------------------------------------------------------------------------------------|
| Scan         | 2578      | Delta Mass      | -0.0148 | Protein  | IPI00029114                                                                         |
| Mass         | 1304.7060 | Next            | 295.600 | Fraction | VF_T13h_band05.mzXML                                                                |
| Hyper        | 431.000   | Peptide/Prophet | 1.00    | Run      | VF_T13h_band05.pep.xml (Vitor/VF_T13h_band05 (VF_SILAC_AssimWindow_NewR_4da_Human)) |
| Protein Hits | 2         | Ion Percent     | 82%     |          |                                                                                     |
| Charge       | 2+        | B               | 1.000   |          |                                                                                     |

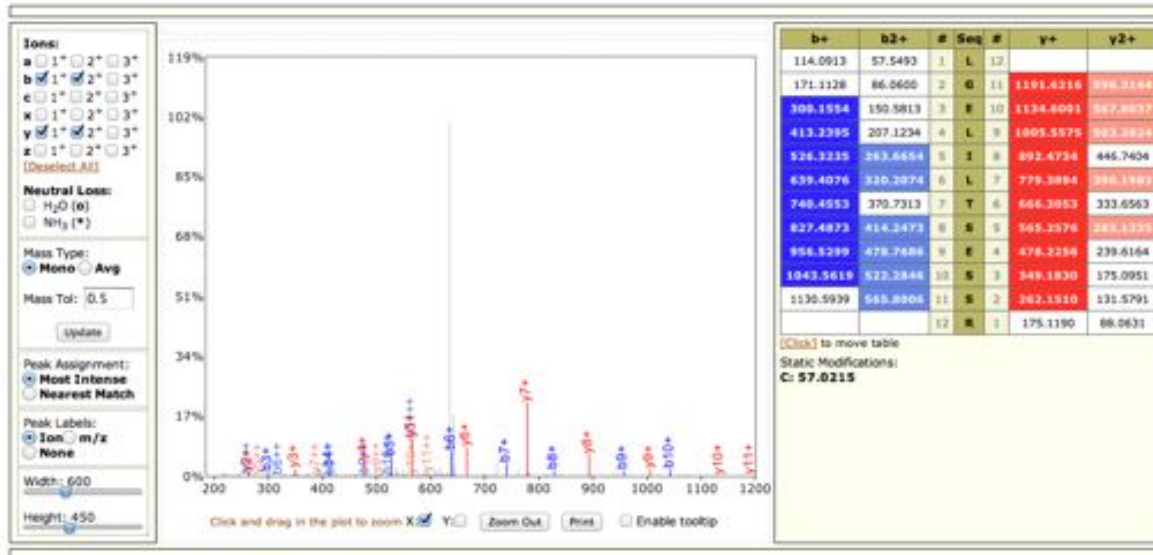



| Protein Probab. | Protein                                                                     | Tot. Peptides | Unique Peptides | Best Gene Name                                    | Scan # | Charge | Delta Mass | Peptide Prophet Score | Peptide Sequence |
|-----------------|-----------------------------------------------------------------------------|---------------|-----------------|---------------------------------------------------|--------|--------|------------|-----------------------|------------------|
| 0.9859          | IPI00220573,<br>IPI00033494,<br>IPI00719669,<br>IPI00604523,<br>IPI00888129 | 1             | 1               | MRLC3,<br>MRLC2,<br>MRLC2,<br>MRCL3,<br>LOC642076 | 2578   | 2+     | -0.0174    | 0.9997                | R.FTDEEVDLYR.E   |

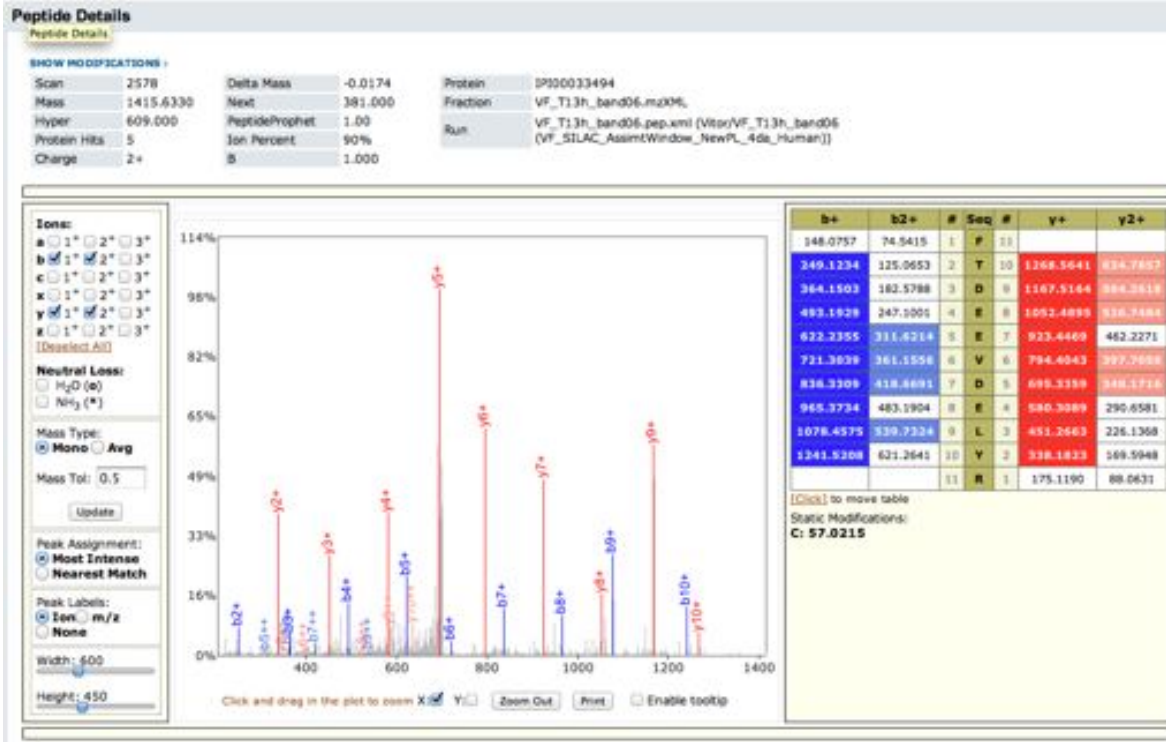

| Protein Probab. | Protein                                     | Tot. Peptides | Unique Peptides | Best Gene Name            | Scan # | Charge | Delta Mass | Peptide Prophet Score | Peptide Sequence     |
|-----------------|---------------------------------------------|---------------|-----------------|---------------------------|--------|--------|------------|-----------------------|----------------------|
| 0.9837          | IPI00178839,<br>IPI00477418,<br>IPI00293402 | 1             | 1               | STX10,<br>STX10,<br>STX10 | 2589   | 2+     | -0.0157    | 0.9999                | K.SPSDLLDASAVSATSR.Y |

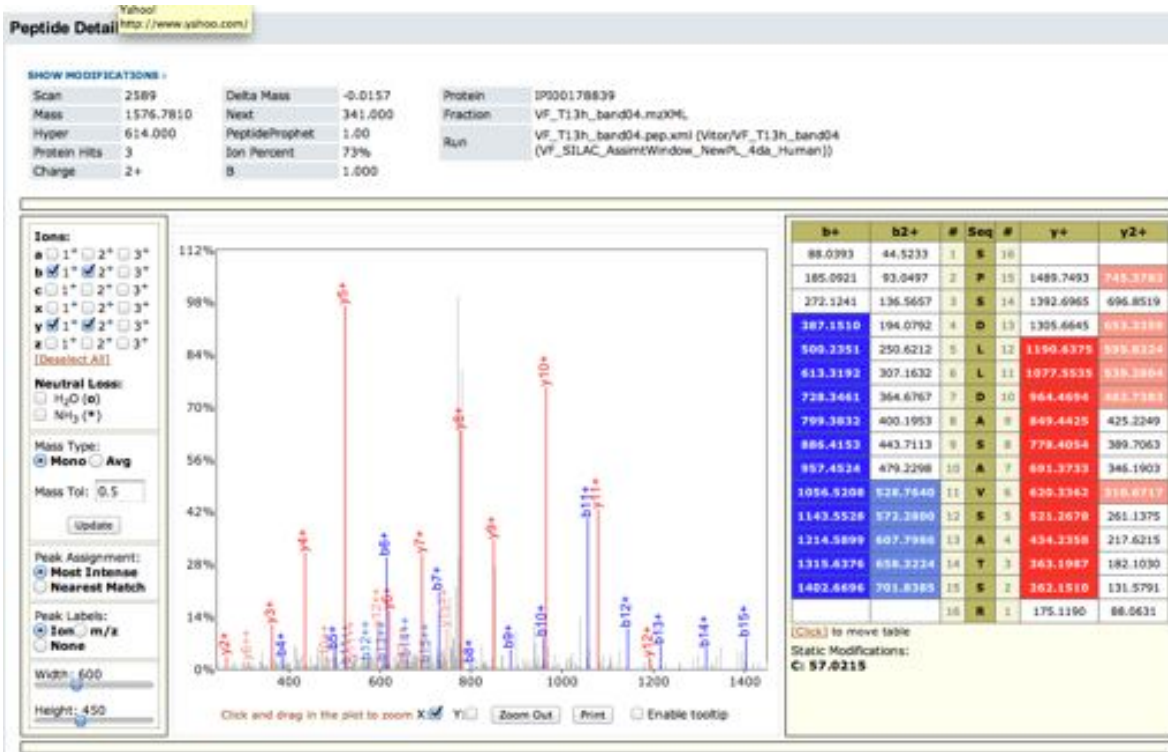

| Protein Probab. | Protein                                                                                     | Tot. Peptides | Unique Peptides | Best Gene Name                                                      | Scan # | Charge | Delta Mass | Peptide Prophet Score | Peptide Sequence        |
|-----------------|---------------------------------------------------------------------------------------------|---------------|-----------------|---------------------------------------------------------------------|--------|--------|------------|-----------------------|-------------------------|
| 0.9838          | IPI00455531,<br>IPI00737171,<br>IPI00888783,<br>IPI00216026,<br>IPI00902560,<br>IPI00024145 | 1             | 1               | LOC729317,<br>LOC729317,<br>LOC729317,<br>VDAC2,<br>VDAC2,<br>VDAC2 | 2596   | 2+     | -0.0256    | 0.9995                | K.VNNSSLIGVGYTQLRPGVK.L |

### Peptide Details

#### SHOW MODIFICATIONS -

|              |           |                 |         |          |                                                                                      |
|--------------|-----------|-----------------|---------|----------|--------------------------------------------------------------------------------------|
| Scan         | 2596      | Delta Mass      | -0.0256 | Protein  | IPI00024145                                                                          |
| Mass         | 2103.1560 | Next            | 288.000 | Fraction | VF_T13h_band06.mzXML                                                                 |
| Hyper        | 496.000   | Peptide/Prophet | 1.00    | Run      | VF_T13h_band06.pep.xml (Vitor/VF_T13h_band06 [VF_SILAC_Asimr@window_NewR_4da_Human]) |
| Protein Hits | 6         | Ion Percent     | 84%     |          |                                                                                      |
| Charge       | 2+        | B               | 1.000   |          |                                                                                      |

#### Ions:

- 1<sup>+</sup>  2<sup>+</sup>  3<sup>+</sup>  
 1<sup>+</sup>  2<sup>+</sup>  3<sup>+</sup>

[Deselect All]

#### Neutral Loss:

- H<sub>2</sub>O (0)  
 NH<sub>3</sub> (\*)

#### Mass Type:

- Mono  Avg

Mass Tol: 0.5

[Update]

#### Peak Assignment:

- Most Intense  
 Nearest Match

#### Peak Labels:

- Ion\_m/z  
 None

Width: 600

Height: 450

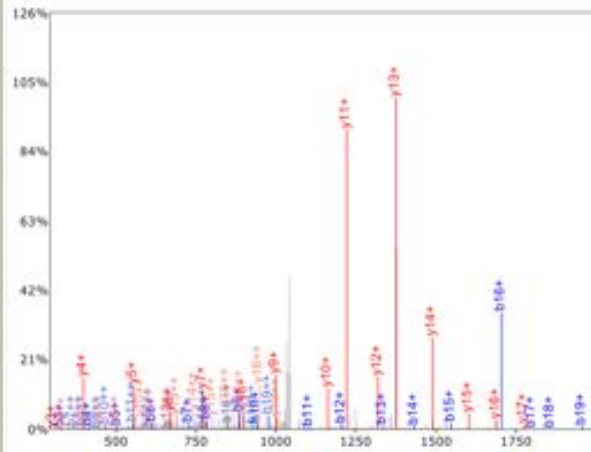

Click and drag in the plot to zoom X: Y: [Zoom Out] [Print] [Enable tooltip]

| b+        | b2+      | #  | Seq | #  | y+        | y2+       |
|-----------|----------|----|-----|----|-----------|-----------|
| 300.0757  | 50.5415  | 1  | V   | 20 |           |           |
| 234.1186  | 307.5629 | 2  | N   | 10 | 2004.0873 | 1093.5473 |
| 338.1615  | 164.5844 | 3  | N   | 18 | 1890.0443 | 849.3298  |
| 438.1936  | 206.1004 | 4  | S   | 17 | 1776.0614 | 865.3043  |
| 592.2256  | 251.6164 | 5  | S   | 16 | 1688.9694 | 844.3993  |
| 619.3097  | 308.1585 | 6  | L   | 15 | 1601.9374 | 801.4723  |
| 728.3927  | 364.7005 | 7  | I   | 14 | 1488.8133 | 744.3303  |
| 788.4182  | 393.2112 | 8  | G   | 13 | 1378.7692 | 685.3882  |
| 884.4836  | 442.7454 | 9  | V   | 12 | 1318.7478 | 659.3775  |
| 941.5001  | 471.2562 | 10 | G   | 11 | 1219.6793 | 618.3433  |
| 1104.5684 | 552.7876 | 11 | Y   | 10 | 1162.6579 | 581.3328  |
| 1205.6161 | 603.3117 | 12 | T   | 9  | 999.5946  | 505.3009  |
| 1333.6747 | 667.3410 | 13 | Q   | 8  | 898.5460  | 449.2773  |
| 1434.7223 | 717.8648 | 14 | T   | 7  | 778.4883  | 385.2478  |
| 1547.8064 | 774.4068 | 15 | L   | 6  | 669.4406  | 333.2238  |
| 1793.9079 | 852.4874 | 16 | R   | 5  | 584.3546  | 278.6829  |
| 1800.9403 | 900.9838 | 17 | P   | 4  | 408.2534  | 200.6324  |
| 1857.9817 | 939.4845 | 18 | G   | 3  | 303.2027  | 152.1050  |
| 1957.0502 | 979.0287 | 19 | V   | 2  | 246.1812  | 123.5942  |
|           |          | 20 | K   | 1  | 147.1228  | 74.0600   |

[Click] to move table

Static Modifications:

C: 57.0215

| Protein Probab. | Protein                     | Tot. Peptides | Unique Peptides | Best Gene Name    | Scan # | Charge | Delta Mass | Peptide Prophet Score | Peptide Sequence |
|-----------------|-----------------------------|---------------|-----------------|-------------------|--------|--------|------------|-----------------------|------------------|
| 0.9796          | IPI00646310,<br>IPI00060107 | 1             | 1               | CHCHD1,<br>CHCHD1 | 2608   | 2+     | -0.0145    | 0.9991                | K.EIQGFLDCAAR.A  |

### Peptide Details

#### SHOW MODIFICATIONS

|              |           |                |         |          |                                                                                         |
|--------------|-----------|----------------|---------|----------|-----------------------------------------------------------------------------------------|
| Scan         | 2608      | Delta Mass     | -0.0145 | Protein  | IPI00060107                                                                             |
| Mass         | 1279.6100 | Next           | 229.000 | Fraction | VF_T13h_band06.mzXML                                                                    |
| Hyper        | 407.000   | PeptideProphet | 1.00    | Run      | VF_T13h_band06.pep.xml (Vitor/VF_T13h_band06<br>[VF_SILAC_AssmtWindow_NewPL_4da_Human]) |
| Protein Hits | 2         | Ion Percent    | 85%     |          |                                                                                         |
| Charge       | 2+        | #              | 1.000   |          |                                                                                         |

#### Ions:

- 1+  2+  3+  
 1+  2+  3+  
 1+  2+  3+  
 1+  2+  3+  
 1+  2+  3+  
 1+  2+  3+

[Deselect All]

#### Neutral Loss:

- H<sub>2</sub>O (w)  
 NH<sub>3</sub> (\*)

Mass Type:

- Mono  Avg

Mass Tol: 0.5

[Update]

#### Peak Assignment:

- Most Intense  Nearest Match

#### Peak Labels:

- Seq. m/z  None

Width: 500

Height: 450

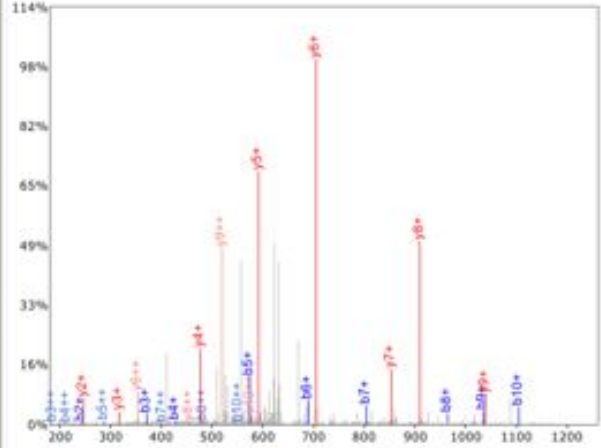

Click and drag in the plot to zoom X: [ ] Y: [ ] [Zoom Out] [Print] [Enable tooltip]

| b+        | b2+      | #  | Seq # | y+        | y2+      |
|-----------|----------|----|-------|-----------|----------|
| 130.0499  | 65.5286  | 1  | E 11  |           |          |
| 243.1339  | 122.0706 | 2  | I 10  | 1150.5674 | 575.7873 |
| 371.1925  | 186.0999 | 3  | Q 9   | 1037.4833 | 519.3493 |
| 428.2349  | 214.4196 | 4  | G 8   | 999.4247  | 485.2168 |
| 575.2834  | 288.1448 | 5  | F 7   | 853.4033  | 426.7053 |
| 688.3469  | 344.6869 | 6  | L 6   | 796.3349  | 383.1733 |
| 803.3934  | 402.3043 | 7  | D 5   | 592.2588  | 296.6290 |
| 963.4241  | 482.2157 | 8  | C 4   | 477.2239  | 239.1156 |
| 1034.4613 | 517.7342 | 9  | A 3   | 317.1932  | 159.1002 |
| 1105.4983 | 553.2528 | 10 | A 2   | 246.1561  | 123.5817 |
|           |          | 11 | R 1   | 175.1190  | 88.0631  |

[Click] to move table  
 Static Modifications:  
**C: 57.0215**

| Protein Probab. | Protein                     | Tot. Peptides | Unique Peptides | Best Gene Name | Scan # | Charge | Delta Mass | Peptide Prophet Score | Peptide Sequence |
|-----------------|-----------------------------|---------------|-----------------|----------------|--------|--------|------------|-----------------------|------------------|
| 0.9822          | IPI00259102,<br>IPI00657648 | 1             | 1               | EPDR1,<br>UCC1 | 2610   | 2+     | -0.0160    | 0.9998                | R.ALLSYDGLNQR.V  |

### Peptide Details

#### SHOW MODIFICATIONS

|              |           |                |         |          |                                                                                         |
|--------------|-----------|----------------|---------|----------|-----------------------------------------------------------------------------------------|
| Scan         | 2610      | Delta Mass     | -0.0160 | Protein  | IPI00259102                                                                             |
| Mass         | 1249.6540 | Next           | 318.000 | Fraction | VF_T13h_band04.mzXML                                                                    |
| Hyper        | 536.000   | PeptideProphet | 1.00    | Run      | VF_T13h_band04.pep.xml (Vitor/VF_T13h_band04<br>(VF_SILAC_AssmtWindow_NewPL_4da_Human)) |
| Protein Hits | 2         | Ion Percent    | 90%     |          |                                                                                         |
| Charge       | 2+        | B              | 1.000   |          |                                                                                         |

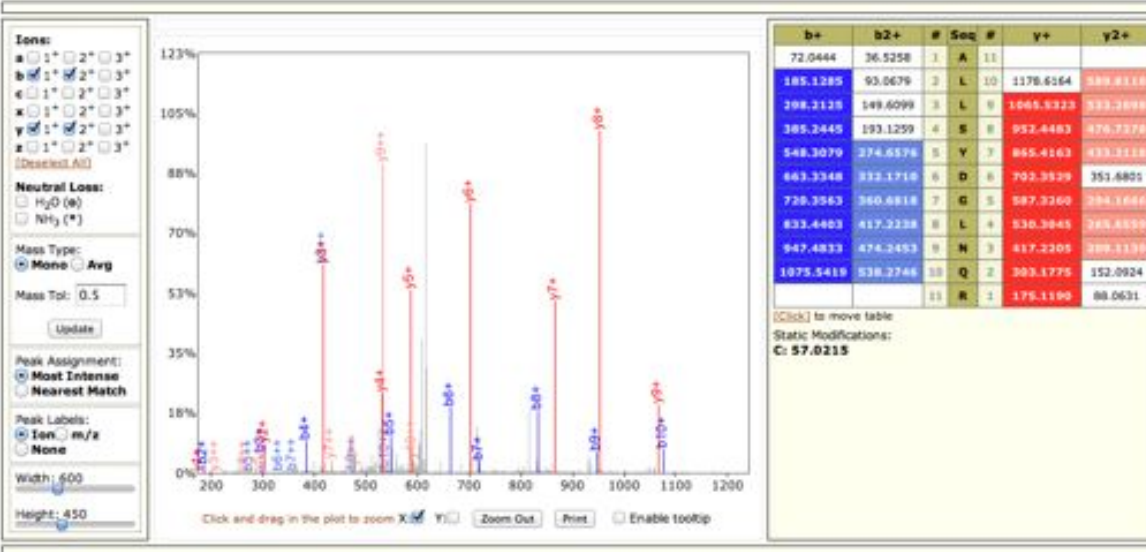

| Protein Probab. | Protein                                                                                                     | Tot. Peptides | Unique Peptides | Best Gene Name                                               | Scan # | Charge | Delta Mass | Peptide Prophet Score | Peptide Sequence   |
|-----------------|-------------------------------------------------------------------------------------------------------------|---------------|-----------------|--------------------------------------------------------------|--------|--------|------------|-----------------------|--------------------|
| 0.9730          | IPI00793922,<br>IPI00747273,<br>IPI00789134,<br>IPI00797221,<br>IPI00795257,<br>IPI00219018,<br>IPI00788737 | 1             | 1               | GAPDH,<br>-,<br>GAPDH,<br>GAPDH,<br>GAPDH,<br>GAPD,<br>GAPDH | 2613   | 2+     | -0.0186    | 0.9995                | R.VPTANVSVVDLTCR.L |

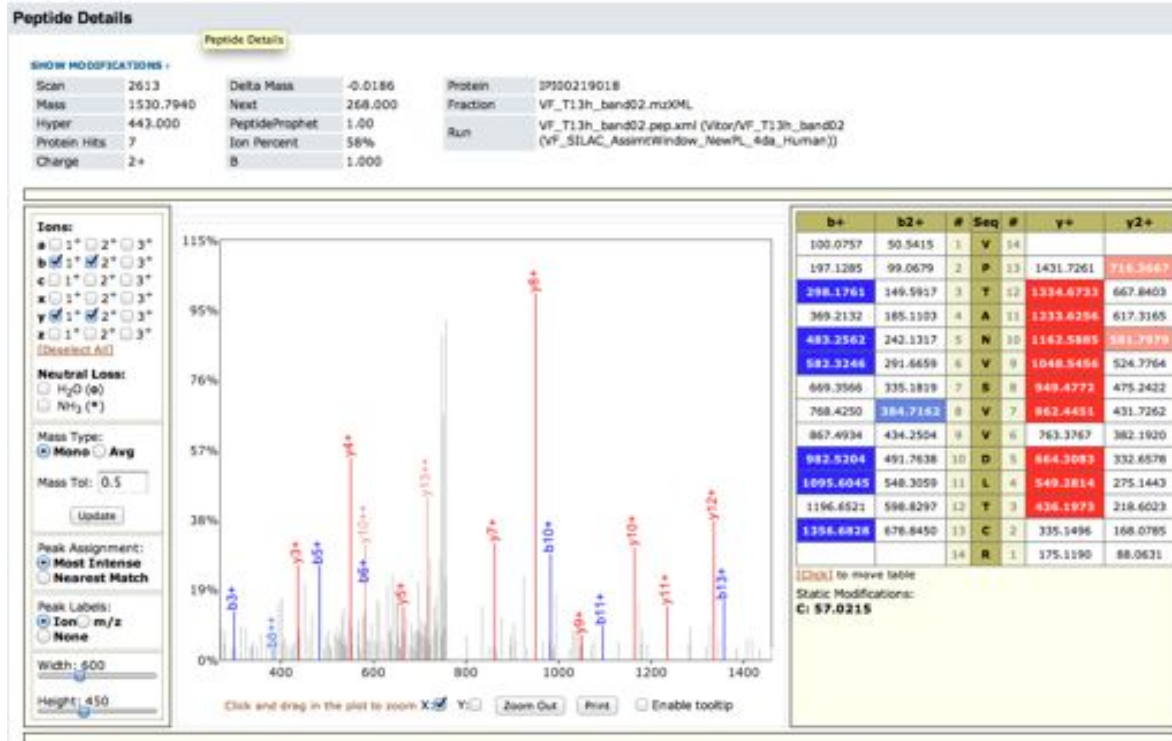

| Protein Probab. | Protein     | Tot. Peptides | Unique Peptides | Best Gene Name | Scan # | Charge | Delta Mass | Peptide Prophet Score | Peptide Sequence      |
|-----------------|-------------|---------------|-----------------|----------------|--------|--------|------------|-----------------------|-----------------------|
| 0.9422          | IP100555744 | 1             | 1               | RPL14          | 2632   | 2+     | +0.9839    | 0.9961                | K.GTAAAAAAAAAAAAAAK.V |

### Peptide Details

#### Peptide Details

##### SHOW MODIFICATIONS

|              |           |                |         |          |                                                                                      |
|--------------|-----------|----------------|---------|----------|--------------------------------------------------------------------------------------|
| Scan         | 2632      | Delta Mass     | +0.9839 | Protein  | IP100555744                                                                          |
| Mass         | 1370.7390 | Next           | 278.000 | Fraction | VF_T13h_band05.mzXML                                                                 |
| Hyper        | 472.000   | PeptideProphet | 1.00    | Run      | VF_T13h_band05.dep.xml (Vitor/VF_T13h_band05 (VF_SILAC_Assmt@Window_NewR_4da_Human)) |
| Protein Hits | 1         | Ion Percent    | 74%     |          |                                                                                      |
| Charge       | 2+        | B              | 1.000   |          |                                                                                      |

#### Ions:

- 1\*  2\*  3\*  
 b 1\*  2\*  3\*  
 c 1\*  2\*  3\*  
 x 1\*  2\*  3\*  
 y 1\*  2\*  3\*  
 z 1\*  2\*  3\*

[Delect All]

#### Neutral Loss:

- H<sub>2</sub>O (e)  
 NH<sub>3</sub> (\*)

Mass Type:

- Mono  Avg

Mass Tol: 0.5

Update

#### Peak Assignment:

- Most Intense  
 Nearest Match

#### Peak Labels:

- Ion, m/z  
 None

Width: 500

Height: 450

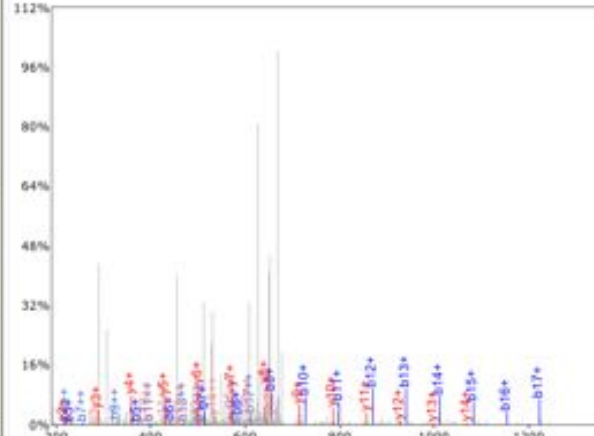

Click and drag in the plot to zoom X: Y: Zoom Out Print Enable tooltip

| b+        | b2+      | #  | Seq # | y+ | y2+                |
|-----------|----------|----|-------|----|--------------------|
| 58.0287   | 29.5180  | 1  | G     | 18 |                    |
| 159.0764  | 80.0418  | 2  | T     | 17 | 1313.7172 657.3612 |
| 338.1135  | 115.5604 | 3  | A     | 16 | 1212.6695 888.8394 |
| 301.1506  | 151.0790 | 4  | A     | 15 | 1141.6324 571.3198 |
| 372.1878  | 186.5975 | 5  | A     | 14 | 1070.5953 835.8813 |
| 443.2249  | 222.1161 | 6  | A     | 13 | 999.5582 560.3817  |
| 514.2620  | 257.6346 | 7  | A     | 12 | 928.5211 884.7642  |
| 585.2991  | 293.1532 | 8  | A     | 11 | 857.4839 620.2456  |
| 656.3362  | 328.6717 | 9  | A     | 10 | 786.4468 393.7271  |
| 727.3733  | 364.1903 | 10 | A     | 9  | 715.4097 358.2085  |
| 798.4104  | 399.7089 | 11 | A     | 8  | 644.3728 322.6899  |
| 869.4476  | 435.2274 | 12 | A     | 7  | 573.3358 187.1714  |
| 940.4847  | 470.7460 | 13 | A     | 6  | 502.2984 251.6528  |
| 1011.5218 | 506.2645 | 14 | A     | 5  | 431.2613 216.1343  |
| 1082.5589 | 541.7831 | 15 | A     | 4  | 360.2241 180.6157  |
| 1153.5960 | 577.3016 | 16 | A     | 3  | 289.1870 145.0972  |
| 1224.6331 | 612.8202 | 17 | A     | 2  | 218.1499 109.5786  |
|           |          | 18 | K     | 1  | 147.1128 74.0600   |

[Click] to move table

Static Modifications:

C: 57.0215

| Protein Probab. | Protein                     | Tot. Peptides | Unique Peptides | Best Gene Name  | Scan # | Charge | Delta Mass | Peptide Prophet Score | Peptide Sequence            |
|-----------------|-----------------------------|---------------|-----------------|-----------------|--------|--------|------------|-----------------------|-----------------------------|
| 0.9837          | IPI00383296,<br>IPI00171903 | 1             | 1               | HNRPM,<br>HNRPM | 2641   | 2+     | -0.0177    | 0.9999                | R.GNFGGSFAGSFGGAGGHAPGVAR.K |

### Peptide Details

#### SHOW MODIFICATIONS

|              |           |                 |         |          |                                              |
|--------------|-----------|-----------------|---------|----------|----------------------------------------------|
| Scan         | 2641      | Delta Mass      | -0.0177 | Protein  | IPI00171903                                  |
| Mass         | 2034.9530 | Next            | 333.000 | Fraction | VF_T13h_band04.mzXML                         |
| Hyper        | 603.000   | Peptide/Prophet | 1.00    | Run      | VF_T13h_band04.pep.xml (Vitor/VF_T13h_band04 |
| Protein Hits | 2         | Ion Percent     | 80%     |          | (VF_SILAC_AssmtWindow_NewP_4da_Human))       |
| Charge       | 2+        | B               | 1.000   |          |                                              |

#### Ions:

- 1\*  2\*  3\*  
 b 1\*  2\*  3\*  
 c 1\*  2\*  3\*  
 x 1\*  2\*  3\*  
 y 1\*  2\*  3\*  
 z 1\*  2\*  3\*  
[\(Deselect All\)](#)

#### Neutral Loss:

- H<sub>2</sub>O (a)  
 NH<sub>3</sub> (\*)

#### Mass Type:

- Mono  Avg

Mass Tol: 0.5

#### Peak Assignment:

- Most Intense  Nearest Match

#### Peak Labels:

- Ion  m/z  None

Width: 500

Height: 450

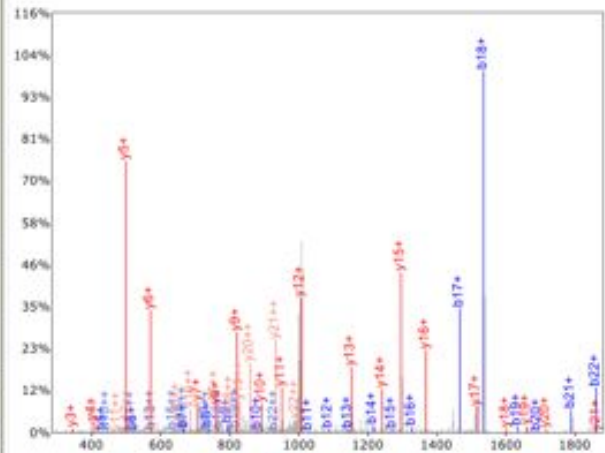

Click and drag in the plot to zoom X:  Y:     Enable tooltip

| b+        | b2+      | #  | Seq # | y+        | y2+      |
|-----------|----------|----|-------|-----------|----------|
| 58.0287   | 29.5180  | 1  | G 23  |           |          |
| 172.0717  | 86.5385  | 2  | H 22  | 1977.9324 | 399.4684 |
| 319.1401  | 160.0737 | 3  | F 21  | 1863.8885 | 932.4479 |
| 376.1615  | 188.5844 | 4  | G 20  | 1716.8201 | 858.8137 |
| 433.1830  | 217.0951 | 5  | G 19  | 1659.7986 | 830.4830 |
| 520.2150  | 260.6112 | 6  | S 18  | 1602.7772 | 801.9822 |
| 667.2835  | 334.1454 | 7  | F 17  | 1515.7451 | 768.3762 |
| 738.3286  | 369.6639 | 8  | A 16  | 1368.6767 | 694.8420 |
| 795.3420  | 398.1747 | 9  | G 15  | 1297.6396 | 649.3234 |
| 892.3741  | 441.8907 | 10 | S 14  | 1240.6181 | 620.8327 |
| 1029.4425 | 515.2248 | 11 | F 13  | 1153.5861 | 577.2987 |
| 1086.4639 | 543.7356 | 12 | G 12  | 1006.5177 | 503.7625 |
| 1143.4854 | 572.2463 | 13 | G 11  | 949.4962  | 475.2518 |
| 1214.5225 | 607.7649 | 14 | A 10  | 892.4748  | 446.7410 |
| 1271.5440 | 636.2756 | 15 | G 9   | 831.4377  | 411.2325 |
| 1328.5654 | 664.7864 | 16 | G 8   | 764.4162  | 382.7217 |
| 1465.6244 | 733.3158 | 17 | H 7   | 707.3947  | 354.2010 |
| 1534.6615 | 768.8344 | 18 | A 6   | 670.3356  | 285.6715 |
| 1633.7142 | 817.3608 | 19 | P 5   | 499.2967  | 250.1530 |
| 1690.7357 | 845.8715 | 20 | G 4   | 402.2459  | 201.6266 |
| 1789.8041 | 895.4057 | 21 | V 3   | 345.2245  | 173.1159 |
| 1860.8412 | 930.9242 | 22 | A 2   | 246.1561  | 123.5817 |
|           |          | 23 | R 1   | 175.1190  | 88.0631  |

(Click) to move table  
 Static Modifications:  
 C: 57.0215



| Protein Probab. | Protein                                                                                     | Tot. Peptides | Unique Peptides | Best Gene Name                                          | Scan # | Charge | Delta Mass | Peptide Prophet Score | Peptide Sequence       |
|-----------------|---------------------------------------------------------------------------------------------|---------------|-----------------|---------------------------------------------------------|--------|--------|------------|-----------------------|------------------------|
| 0.9810          | IPI00293254,<br>IPI00065554,<br>IPI00879242,<br>IPI00879259,<br>IPI00872855,<br>IPI00009841 | 1             | 1               | EWSR1,<br>EWSR1,<br>EWSR1,<br>EWSR1,<br>EWSR1,<br>EWSR1 | 2641   | 2+     | -0.0248    | 0.9999                | R.AGDWQCNPNGCGNQFAWR.T |

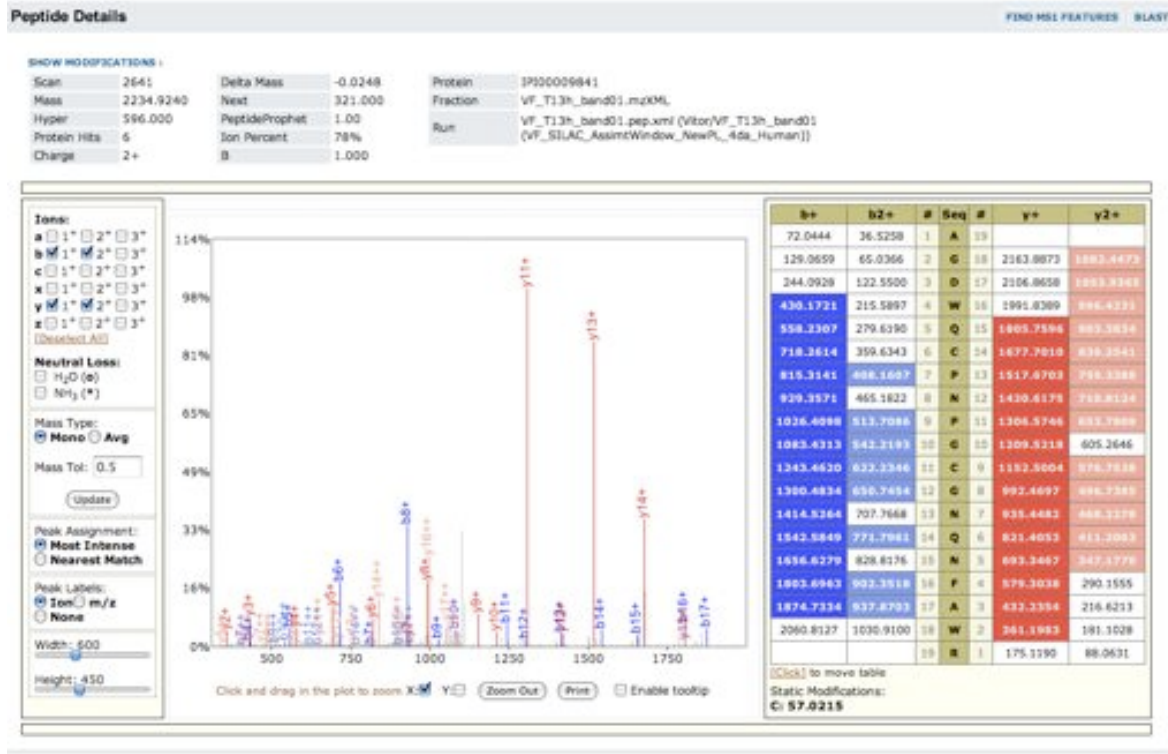

| Protein Probab. | Protein                                                                                     | Tot. Peptides | Unique Peptides | Best Gene Name                                    | Scan # | Charge | Delta Mass | Peptide Prophet Score | Peptide Sequence |
|-----------------|---------------------------------------------------------------------------------------------|---------------|-----------------|---------------------------------------------------|--------|--------|------------|-----------------------|------------------|
| 0.9535          | IPI00556640,<br>IPI00012503,<br>IPI00873201,<br>IPI00744835,<br>IPI00873020,<br>IPI00219825 | 1             | 1               | PSAP,<br>PSAP,<br>PSAP,<br>PSAP,<br>PSAP,<br>PSAP | 2644   | 2+     | -0.0129    | 0.9971                | K.GCSFLPDPYQK.Q  |

### Peptide Details

#### SHOW MODIFICATIONS

|              |           |                |         |          |                                                                                         |
|--------------|-----------|----------------|---------|----------|-----------------------------------------------------------------------------------------|
| Scan         | 2644      | Delta Mass     | -0.0129 | Protein  | IPI00012503                                                                             |
| Mass         | 1311.6040 | Next           | 324.000 | Fraction | VF_T13h_band05.mzXML                                                                    |
| Hyper        | 433.000   | PeptideProphet | 1.00    | Run      | VF_T13h_band05.pep.xml (Vitor/VF_T13h_band05<br>[VF_S1LAC_AssimWindow_NewPL_4ds_Human]) |
| Protein Hits | 6         | Ion Percent    | 60%     |          |                                                                                         |
| Charge       | 2+        | B              | 1.000   |          |                                                                                         |

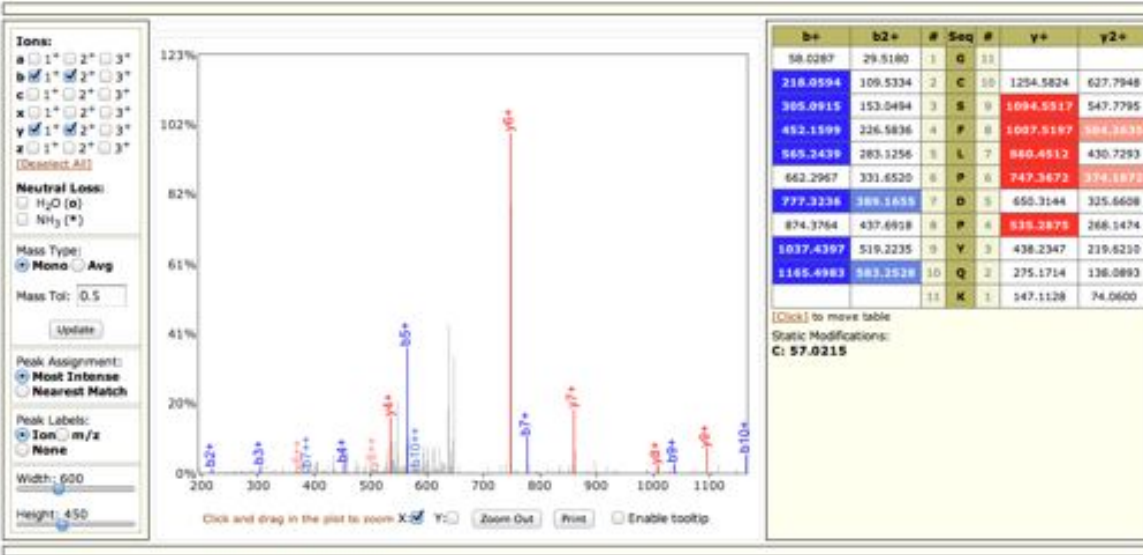

| Protein Probab. | Protein     | Tot. Peptides | Unique Peptides | Best Gene Name | Scan # | Charge | Delta Mass | Peptide Prophet Score | Peptide Sequence |
|-----------------|-------------|---------------|-----------------|----------------|--------|--------|------------|-----------------------|------------------|
| 0.9865          | IP100009407 | 1             | 1               | DAD1           | 2659   | 2+     | -0.0164    | 0.9999                | R.FLEEYLSSTPQR.L |

### Peptide Details

#### SHOW MODIFICATIONS

|              |           |                |         |          |                                                                                       |
|--------------|-----------|----------------|---------|----------|---------------------------------------------------------------------------------------|
| Scan         | 2659      | Delta Mass     | -0.0164 | Protein  | IP100009407                                                                           |
| Mass         | 1469.7270 | Next           | 349.000 | Fraction | VF_T13h_band05.mzXML                                                                  |
| Hyper        | 577.000   | PeptideProphet | 1.00    | Run      | VF_T13h_band05_sep.xml (Vitor/VF_T13h_band05 (VF_SILAC_AssintWindow_NewPL_4da_Human)) |
| Protein Hits | 1         | Ion Percent    | 91%     |          |                                                                                       |
| Charge       | 2+        | B              | 1.000   |          |                                                                                       |

#### Ions:

- 1<sup>+</sup>  2<sup>+</sup>  3<sup>+</sup>  
 1<sup>+</sup>  2<sup>+</sup>  3<sup>+</sup>

#### Neutral Loss:

- H<sub>2</sub>O (0)  
 NH<sub>3</sub> (\*)

#### Mass Type:

- Mono  Avg

Mass Tol: 0.5

Update

#### Peak Assignment:

- Most Intense  Nearest Match

#### Peak Labels:

- Ion  m/z  None

Width: 500

Height: 450

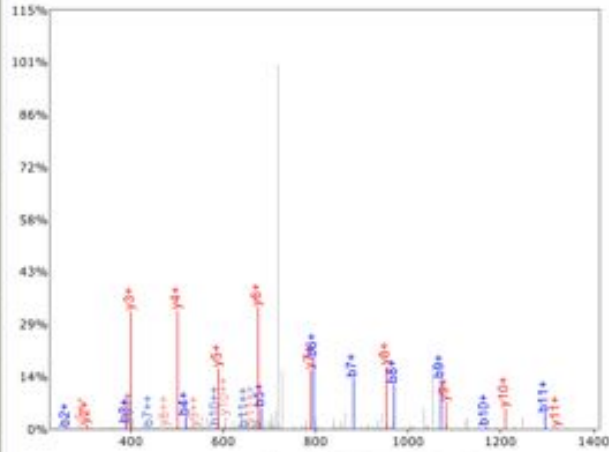

Click and drag in the plot to zoom X: Y: Zoom Out Print Enable tooltip

| b+        | b2+      | #  | Seq # | y+        | y2+      |
|-----------|----------|----|-------|-----------|----------|
| 148.0757  | 74.5415  | 1  | F 13  |           |          |
| 281.1598  | 131.0835 | 2  | L 11  | 1322.6187 | 681.6370 |
| 390.2823  | 195.6048 | 3  | E 18  | 1209.5746 | 895.3588 |
| 519.2449  | 260.1261 | 4  | E 9   | 1080.5320 | 540.7696 |
| 682.3983  | 341.6578 | 5  | V 8   | 951.4894  | 479.3483 |
| 795.3923  | 398.1998 | 6  | L 7   | 788.4361  | 394.7167 |
| 882.4244  | 441.7158 | 7  | S 6   | 675.3420  | 338.1747 |
| 949.4564  | 465.2318 | 8  | S 5   | 588.3100  | 294.6550 |
| 1070.5041 | 535.7557 | 9  | T 4   | 501.2780  | 251.1426 |
| 1187.5548 | 594.2821 | 10 | P 3   | 400.2303  | 200.6288 |
| 1295.6154 | 648.3113 | 11 | Q 2   | 303.1775  | 152.0924 |
|           |          | 12 | R 1   | 175.1190  | 88.0631  |

[Click] to move table

Static Modifications:

C: 57.0215

| Protein Probab. | Protein     | Tot. Peptides | Unique Peptides | Best Gene Name | Scan # | Charge | Delta Mass | Peptide Prophet Score | Peptide Sequence |
|-----------------|-------------|---------------|-----------------|----------------|--------|--------|------------|-----------------------|------------------|
| 0.9569          | IP100009407 | 1             | 1               | DAD1           | 2663   | 2+     | -0.0222    | 0.9969                | R.FLEEYLSSTPQR.L |

### Peptide Details

#### SHOW MODIFICATIONS

|              |           |                |         |          |                                                                                      |
|--------------|-----------|----------------|---------|----------|--------------------------------------------------------------------------------------|
| Scan         | 2663      | Delta Mass     | -0.0222 | Protein  | IP00009407                                                                           |
| Mass         | 1469.7270 | Next           | 279.000 | Fraction | VF_T13h_band06.mzXML                                                                 |
| Hyper        | 412.000   | PeptideProphet | 1.00    | Run      | VF_T13h_band06.pep.xml (Vitor/VF_T13h_band06 (VF_SILAC_AssmtWindow_NewPL_4Gb_Human)) |
| Protein Hits | 1         | Ion Percent    | 86%     |          |                                                                                      |
| Charge       | 2+        | B              | 1.000   |          |                                                                                      |

#### Ions:

- 1\*  2\*  3\*  
 1\*  2\*  3\*  
 1\*  2\*  3\*  
 1\*  2\*  3\*  
 1\*  2\*  3\*  
 1\*  2\*  3\*

[\[Delete All\]](#)

#### Neutral Loss:

- H<sub>2</sub>O (a)  
 NH<sub>3</sub> (\*)

#### Mass Type:

- Mono  Avg

Mass Tol: 0.5

[Update](#)

#### Peak Assignment:

- Most Intense  
 Nearest Match

#### Peak Labels:

- Ion<sub>m/z</sub>  
 None

Width: 600

Height: 450

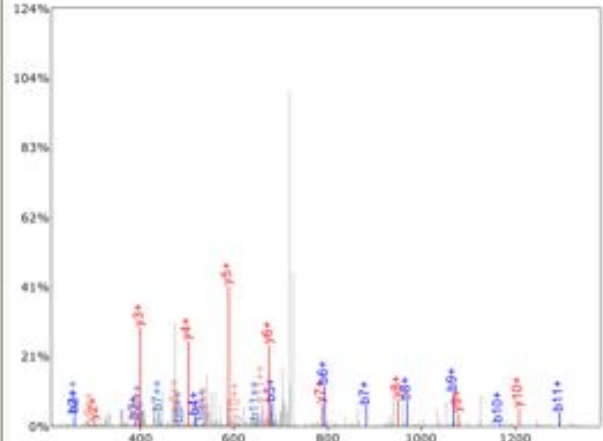

Click and drag in the plot to zoom X:  Y:  [Zoom Out](#) [Print](#)  Enable tooltip

| b+        | b2+      | #  | Seq # | y+        | y2+      |
|-----------|----------|----|-------|-----------|----------|
| 148.0757  | 74.5415  | 1  | F 12  |           |          |
| 261.1598  | 131.0835 | 2  | L 11  | 1322.6587 | 141.6278 |
| 390.3023  | 195.6048 | 3  | E 10  | 1209.5746 | 395.2588 |
| 519.3449  | 260.1261 | 4  | E 9   | 1080.6320 | 543.7636 |
| 682.3083  | 341.6578 | 5  | V 8   | 951.4894  | 479.2483 |
| 795.3923  | 398.1998 | 6  | L 7   | 788.4261  | 354.7167 |
| 882.4244  | 441.7158 | 7  | S 6   | 675.3420  | 338.1747 |
| 949.4564  | 485.2318 | 8  | S 5   | 588.3100  | 181.6336 |
| 1070.5041 | 535.7557 | 9  | T 4   | 501.2780  | 251.3426 |
| 1187.5568 | 584.2821 | 10 | P 3   | 400.3303  | 200.6288 |
| 1295.6194 | 648.3113 | 11 | Q 2   | 303.1775  | 152.0824 |
|           |          | 12 | R 1   | 175.1190  | 88.0631  |

[\[Click\]](#) to move table

Static Modifications:

C: 57.0215

| Protein Probab. | Protein                     | Tot. Peptides | Unique Peptides | Best Gene Name | Scan # | Charge | Delta Mass | Peptide Prophet Score | Peptide Sequence     |
|-----------------|-----------------------------|---------------|-----------------|----------------|--------|--------|------------|-----------------------|----------------------|
| 0.9361          | IPI00218988,<br>IPI00215901 | 1             | 1               | AK2,<br>AK2    | 2697   | 2+     | -0.0208    | 0.9948                | R.LQAYHTQTTPLIEYYR.K |

**Peptide Details**

SHOW MODIFICATIONS :

|              |           |                |         |          |                                              |
|--------------|-----------|----------------|---------|----------|----------------------------------------------|
| Scan         | 2697      | Delta Mass     | -0.0208 | Protein  | IPI00215901                                  |
| Mass         | 1997.0130 | Next           | 256.000 | Fraction | VF_T13h_band06.mzXML                         |
| Hyper        | 377.000   | PeptideProphet | 0.99    | Run      | VF_T13h_band06.pep.xml (Vitor/VF_T13h_band06 |
| Protein Hits | 2         | Ion Percent    | 77%     |          | (VF_SILAC_AssimrWindow_NewPL_4da_Human)}     |
| Charge       | 2+        | S              | 0.000   |          |                                              |

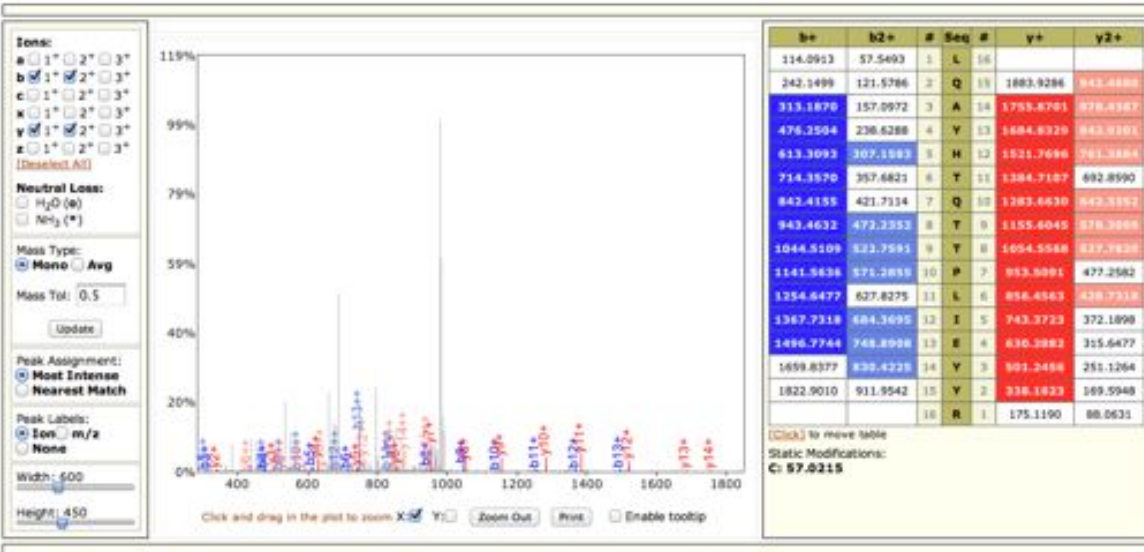

| b+        | b2+      | #  | Seq | #  | y+        | y2+      |
|-----------|----------|----|-----|----|-----------|----------|
| 114.0913  | 57.5493  | 1  | L   | 16 |           |          |
| 242.3499  | 121.5786 | 2  | Q   | 15 | 1803.9286 | 943.4380 |
| 313.1870  | 157.0972 | 3  | A   | 18 | 1755.8701 | 878.4387 |
| 476.2504  | 238.6268 | 4  | Y   | 13 | 1684.8320 | 843.9201 |
| 613.3093  | 307.1583 | 5  | H   | 13 | 1521.7696 | 761.3884 |
| 714.3570  | 357.6821 | 6  | T   | 11 | 1384.7107 | 692.8590 |
| 842.4135  | 421.7114 | 7  | Q   | 10 | 1283.6630 | 642.3302 |
| 943.4632  | 472.2353 | 8  | T   | 9  | 1155.6045 | 578.3068 |
| 1044.5109 | 522.7591 | 9  | T   | 8  | 1054.5568 | 527.7838 |
| 1141.5638 | 571.2838 | 10 | P   | 7  | 953.5091  | 477.2582 |
| 1234.6477 | 627.8275 | 11 | L   | 6  | 856.4563  | 428.7318 |
| 1367.7318 | 684.3695 | 12 | I   | 5  | 743.3723  | 372.1898 |
| 1496.7744 | 748.8998 | 13 | E   | 4  | 630.2882  | 315.6477 |
| 1659.8377 | 830.4225 | 14 | Y   | 3  | 501.2456  | 251.1264 |
| 1822.9010 | 911.9542 | 15 | Y   | 2  | 338.1823  | 169.5948 |
|           |          | 16 | R   | 1  | 175.1190  | 88.0631  |

[\[Click\]](#) to move table

Static Modifications:

C: 57.0215

| Protein Probab. | Protein                     | Tot. Peptides | Unique Peptides | Best Gene Name | Scan # | Charge | Delta Mass | Peptide Prophet Score | Peptide Sequence      |
|-----------------|-----------------------------|---------------|-----------------|----------------|--------|--------|------------|-----------------------|-----------------------|
| 0.9807          | IPI00902534,<br>IPI00014439 | 1             | 1               | -,<br>QDPR     | 2716   | 2+     | -0.0213    | 0.9997                | K.NRPSSGSLIQVVTTEGR.T |

### Peptide Details

#### SHOW MODIFICATIONS

|              |           |                |         |          |                                                                                          |
|--------------|-----------|----------------|---------|----------|------------------------------------------------------------------------------------------|
| Scan         | 2716      | Delta Mass     | -0.0213 | Protein  | IPI00014439                                                                              |
| Mass         | 1800.9560 | Next           | 724.000 | Fraction | VF_T13h_band04.mzXML                                                                     |
| Hyper        | 417.000   | PeptideProphet | 1.00    | Run      | VF_T13h_band04.pep.xml (Vitor/VF_T13h_band04<br>(VF_SILAC_AssimtWindow_NewPL_4da_Human)) |
| Protein Hits | 2         | Ion Percent    | 81%     |          |                                                                                          |
| Charge       | 2+        | B              | 1.000   |          |                                                                                          |

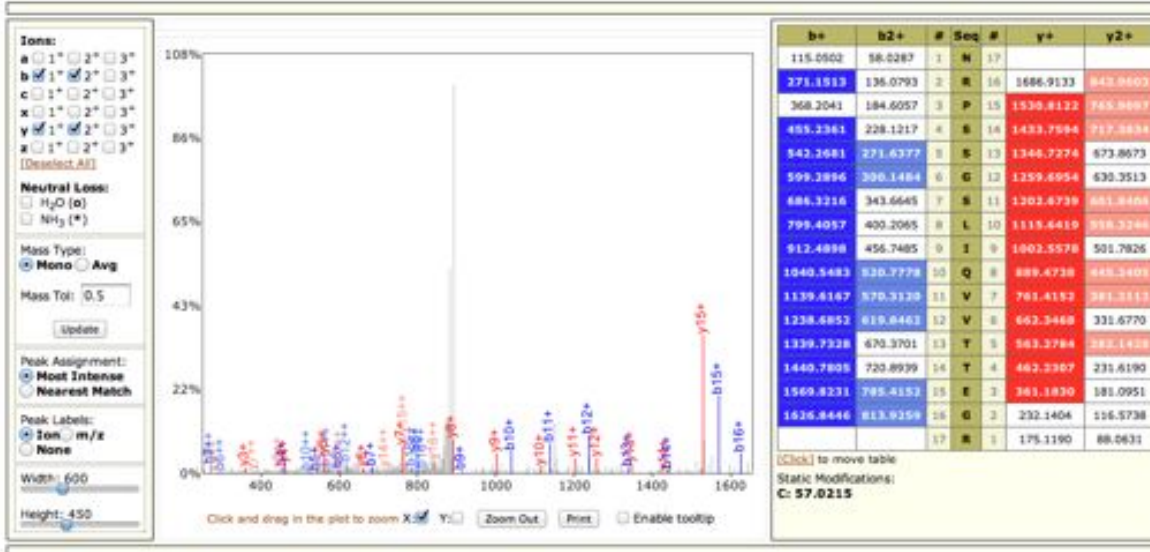

| Protein Probab. | Protein     | Tot. Peptides | Unique Peptides | Best Gene Name | Scan # | Charge | Delta Mass | Peptide Prophet Score | Peptide Sequence                    |
|-----------------|-------------|---------------|-----------------|----------------|--------|--------|------------|-----------------------|-------------------------------------|
| 0.9851          | IP100027773 | 1             | 1               | HOPS           | 2720   | 3+     | -0.0310    | 1.0000                | R.HRGQAAQPEPSTGFTATPPAPDSPQEPLVLR.L |

Peptide Details

SHOW MODIFICATIONS +

|              |           |                 |         |          |                                                                                   |
|--------------|-----------|-----------------|---------|----------|-----------------------------------------------------------------------------------|
| Scan         | 2720      | Delta Mass      | -0.0310 | Protein  | IP100027773                                                                       |
| Mass         | 3252.6400 | Next            | 411.000 | Fraction | VF_T13h_bar04_m006                                                                |
| Hyper        | 682.000   | Peptide/Prophet | 1.00    | Run      | VF_T13h_bar04_exp.xml (View/VF_T13h_bar04 (VF_SELAC_AssmtWindow_NewPL_Ads_Human)) |
| Protein Hits | 1         | Ion Percent     | 45%     |          |                                                                                   |
| Charge       | 3+        | B               | 2.000   |          |                                                                                   |

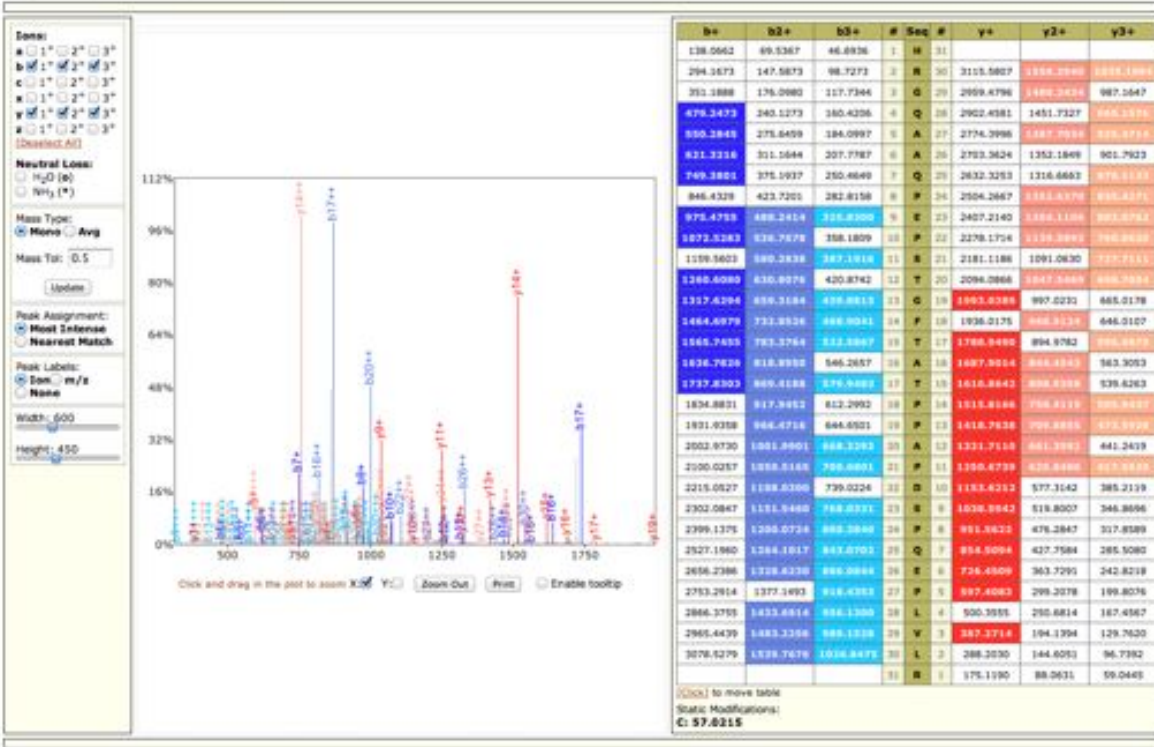

| Protein Probab. | Protein                     | Tot. Peptides | Unique Peptides | Best Gene Name | Scan # | Charge | Delta Mass | Peptide Prophet Score | Peptide Sequence |
|-----------------|-----------------------------|---------------|-----------------|----------------|--------|--------|------------|-----------------------|------------------|
| 0.9822          | IPI00465315,<br>IPI00872914 | 1             | 1               | CYCS,<br>-     | 2728   | 2+     | -0.0132    | 0.9998                | K.TGPNLHGLFGR.K  |

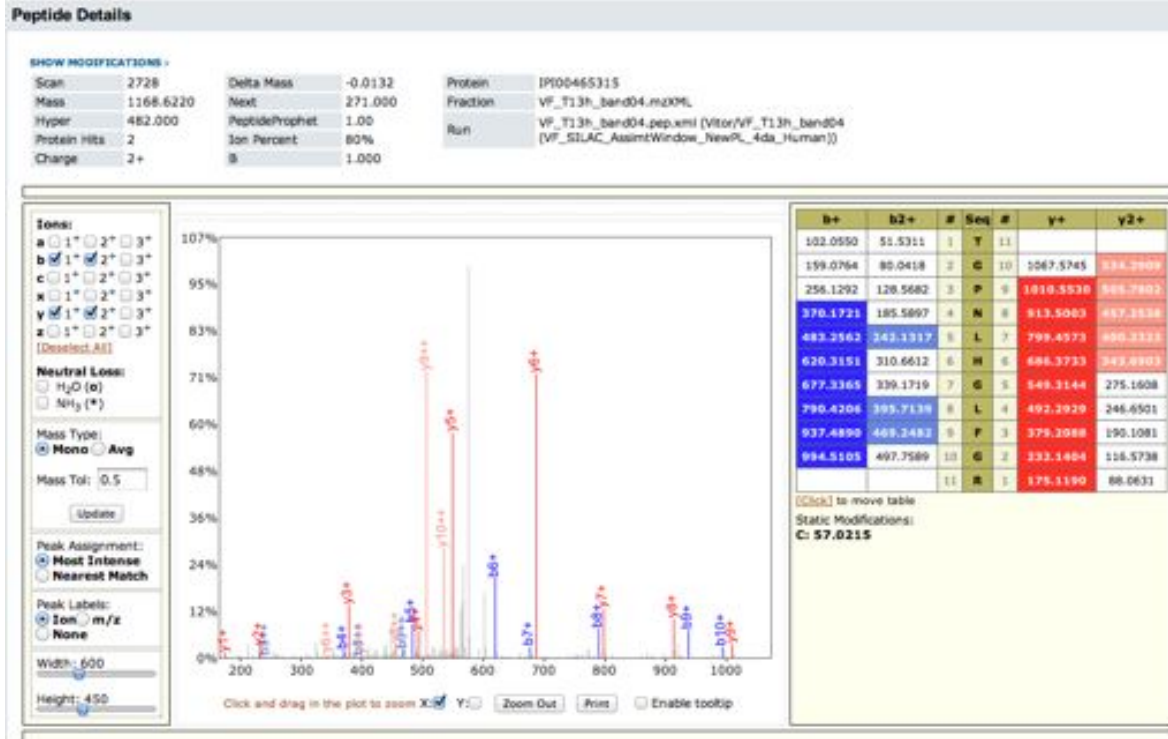



| Protein Probab. | Protein                     | Tot. Peptides | Unique Peptides | Best Gene Name    | Scan # | Charge | Delta Mass | Peptide Prophet Score | Peptide Sequence     |
|-----------------|-----------------------------|---------------|-----------------|-------------------|--------|--------|------------|-----------------------|----------------------|
| 0.9819          | IPI00743775,<br>IPI00024642 | 1             | 1               | CCDC47,<br>CCDC47 | 2748   | 2+     | -0.0186    | 1.0000                | K.LNQENEHIYNLWCSGR.V |

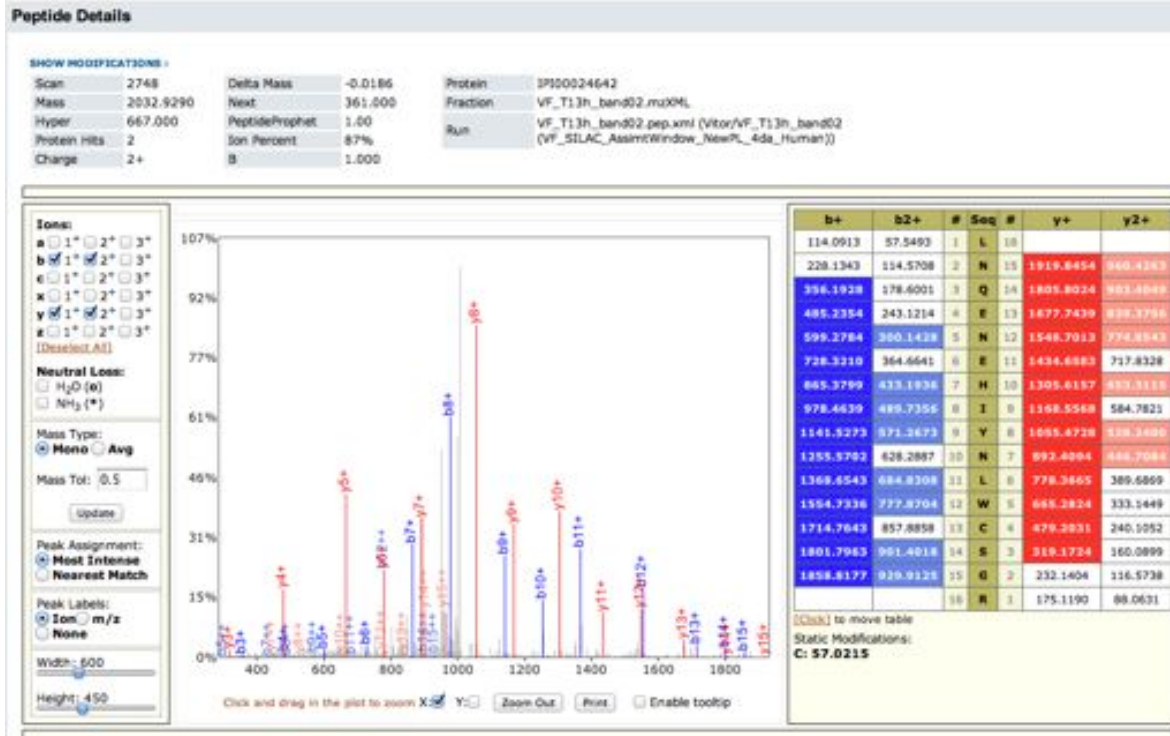

| Protein Probab. | Protein                                                     | Tot. Peptides | Unique Peptides | Best Gene Name                      | Scan # | Charge | Delta Mass | Peptide Prophet Score | Peptide Sequence     |
|-----------------|-------------------------------------------------------------|---------------|-----------------|-------------------------------------|--------|--------|------------|-----------------------|----------------------|
| 0.9776          | IPI00747225,<br>IPI00217113,<br>IPI00027172,<br>IPI00013455 | 1             | 1               | CLIP1,<br>CLIP1,<br>CLIP1,<br>CLIP1 | 2770   | 2+     | -0.0190    | 0.9997                | K.KTSHVGEIEQELALAR.D |

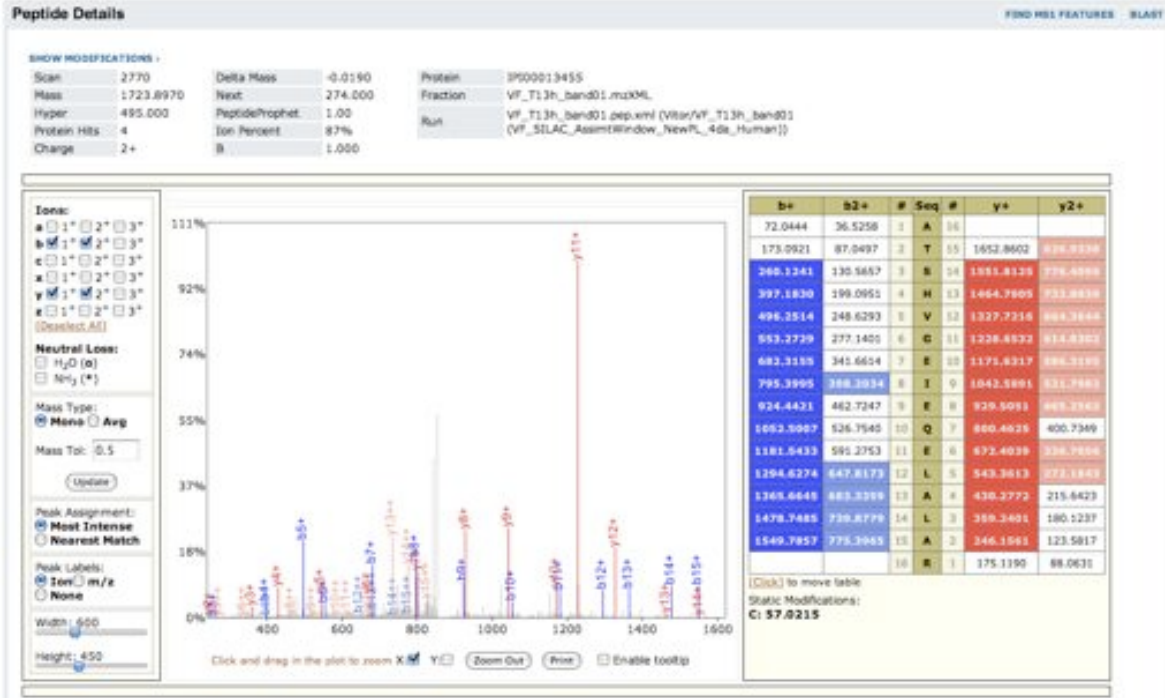

| Protein Probab. | Protein                     | Tot. Peptides | Unique Peptides | Best Gene Name  | Scan # | Charge | Delta Mass | Peptide Prophet Score | Peptide Sequence        |
|-----------------|-----------------------------|---------------|-----------------|-----------------|--------|--------|------------|-----------------------|-------------------------|
| 0.9880          | IPI00642644,<br>IPI00024462 | 1             | 1               | DHODH,<br>DHODH | 2779   | 2+     | -0.0152    | 1.0000                | R.VPIIGVGGVSSGQDALEK'.I |

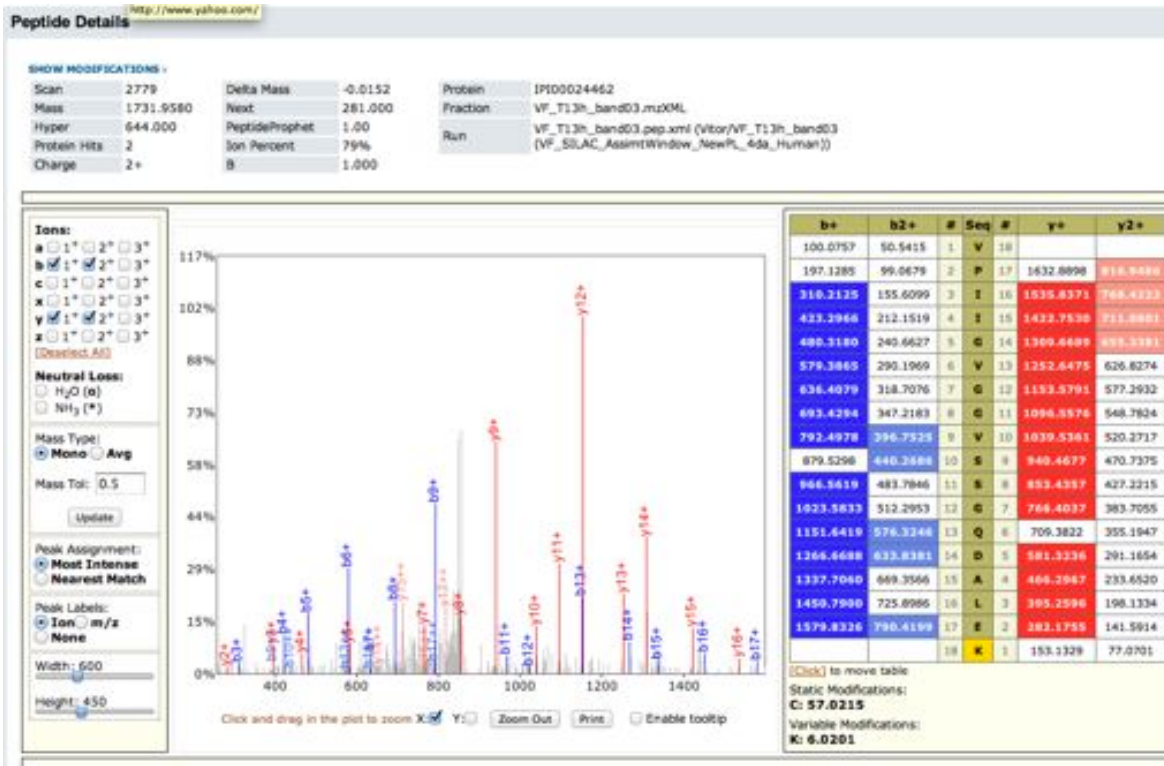

| Protein Probab. | Protein     | Tot. Peptides | Unique Peptides | Best Gene Name | Scan # | Charge | Delta Mass | Peptide Prophet Score | Peptide Sequence  |
|-----------------|-------------|---------------|-----------------|----------------|--------|--------|------------|-----------------------|-------------------|
| 0.9419          | IPI00027448 | 1             | 1               | ATP5L          | 2811   | 2+     | -0.0159    | 0.9954                | K.VELVPPTPAEIPR.A |

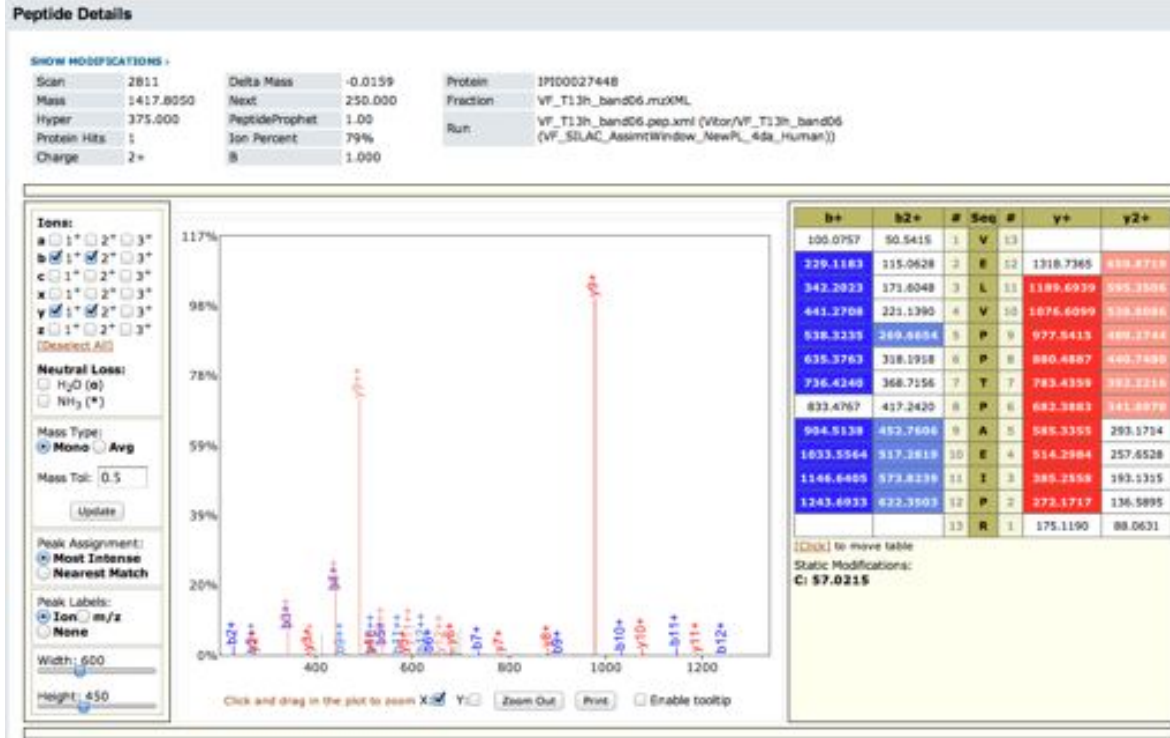

| Protein Probab. | Protein                               | Tot. Peptides | Unique Peptides | Best Gene Name    | Scan # | Charge | Delta Mass | Peptide Prophet Score | Peptide Sequence           |
|-----------------|---------------------------------------|---------------|-----------------|-------------------|--------|--------|------------|-----------------------|----------------------------|
| 0.9880          | IPI00059809, IPI00909127, IPI00005129 | 1             | 1               | SCAMP1, -, SCAMP1 | 2826   | 3+     | -0.0232    | 1.0000                | K.TVQTAANAASTAASSAAQNAFK.G |

Peptide Details

SHOW MODIFICATIONS -

|              |           |                |         |          |                                            |
|--------------|-----------|----------------|---------|----------|--------------------------------------------|
| Scan         | 2826      | Delta Mass     | -0.0232 | Protein  | IPI00005129                                |
| Mass         | 2152.0630 | Next           | 287.000 | Fraction | VF_F13h_band3.mzXML                        |
| Hyper        | 495.000   | PeptideProphet | 1.00    | Run      | VF_F13h_band3.pep.xml (Vtor/VF_F13h_band3) |
| Protein Hits | 3         | Ion Percent    | 58%     |          | [VF_SILAC_AcsmrWindow_NewPi_4ds_Human]     |
| Charge       | 3+        | B              | 1.000   |          |                                            |

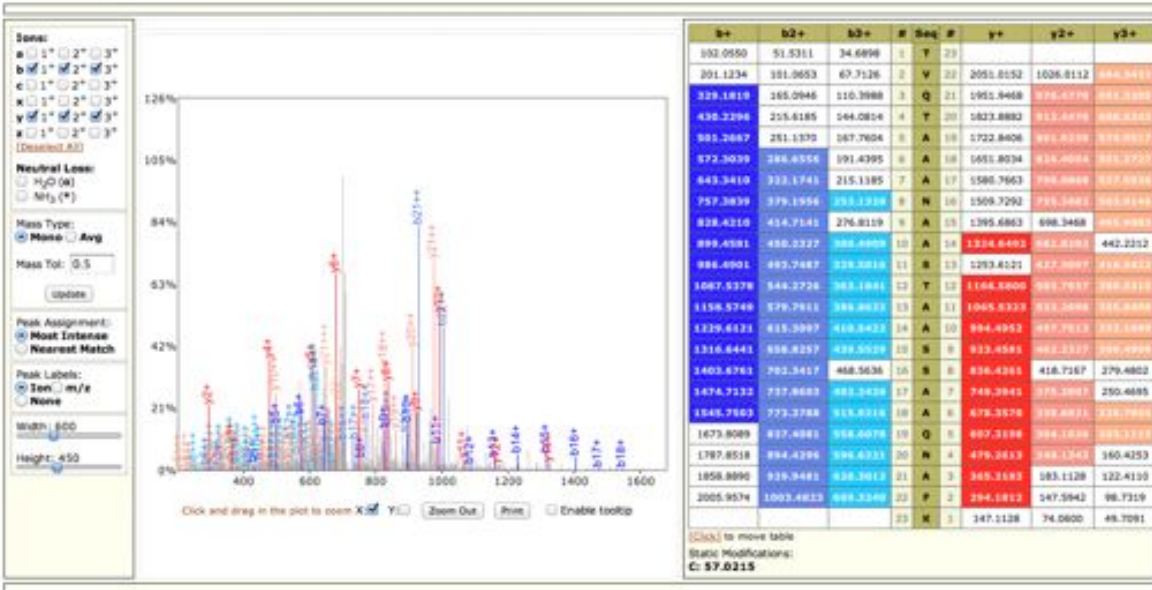

| Protein Probab. | Protein                                                     | Tot. Peptides | Unique Peptides | Best Gene Name                     | Scan # | Charge | Delta Mass | Peptide Prophet Score | Peptide Sequence       |
|-----------------|-------------------------------------------------------------|---------------|-----------------|------------------------------------|--------|--------|------------|-----------------------|------------------------|
| 0.9729          | IPI00784408,<br>IPI00902520,<br>IPI00848226,<br>IPI00641950 | 1             | 1               | GNB2L1,<br>-,<br>GNB2L1,<br>GNB2L1 | 2829   | 2+     | -0.0181    | 0.9987                | K.IIVDELK'QEVISTSSK'.A |

### Peptide Details

#### SHOW MODIFICATIONS

|              |           |                 |         |          |                                                                                       |
|--------------|-----------|-----------------|---------|----------|---------------------------------------------------------------------------------------|
| Scan         | 2829      | Delta Mass      | -0.0181 | Protein  | IPI00641950                                                                           |
| Mass         | 1801.0360 | Next            | 290.000 | Fraction | VF_T13n_band03.mzXML                                                                  |
| Hyper        | 538.000   | Peptide/Prophet | 1.00    | Run      | VF_T13n_band03.pep.xml (vitor/VF_T13n_band03 [VF_S2LAC_AssimtWindow_NewPL_4da_Human]) |
| Protein Hits | 4         | Ion Percent     | 83%     |          |                                                                                       |
| Charge       | 2+        | B               | 1.000   |          |                                                                                       |

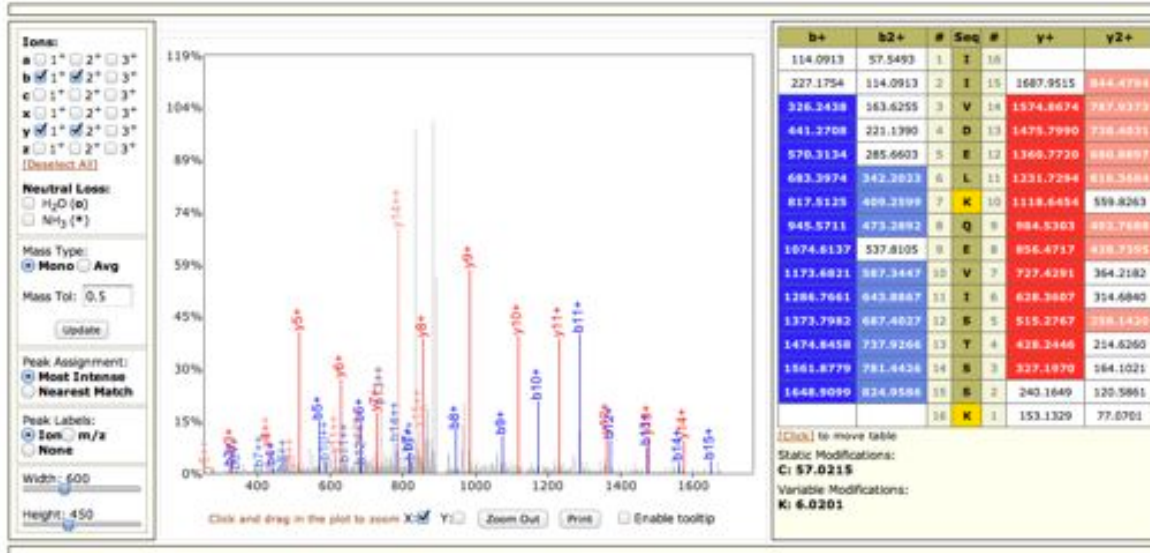

| Protein Probab. | Protein     | Tot. Peptides | Unique Peptides | Best Gene Name | Scan # | Charge | Delta Mass | Peptide Prophet Score | Peptide Sequence  |
|-----------------|-------------|---------------|-----------------|----------------|--------|--------|------------|-----------------------|-------------------|
| 0.8298          | IPI00027448 | 1             | 1               | ATP5L          | 2833   | 2+     | -0.0154    | 0.9848                | K.VELVPPTPAEIPR.A |

**Peptide Details**

SHOW MODIFICATIONS -

|                 |                       |                                                                                          |
|-----------------|-----------------------|------------------------------------------------------------------------------------------|
| Scan: 2833      | Delta Mass: -0.0154   | Protein: IPI00027448                                                                     |
| Mass: 1417.8050 | Next: 273.000         | Fraction: vF_T13h_band05.mzXML                                                           |
| Hyper: 354.000  | Peptide/Prophet: 0.98 | Run: vF_T13h_band05.pep.xml (vitor/vF_T13h_band05 (vF_SILAC_AssimWindow_NewP_4da_Human)) |
| Protein Hits: 1 | Ion Percent: 71%      |                                                                                          |
| Charge: 2+      | B: 1.000              |                                                                                          |

  

**Ions:**

a  1\*  2\*  3\*

b  1\*  2\*  3\*

c  1\*  2\*  3\*

x  1\*  2\*  3\*

y  1\*  2\*  3\*

z  1\*  2\*  3\*

[Deselect All]

**Neutral Loss:**

H<sub>2</sub>O (0)

NH<sub>3</sub> (\*)

**Mass Type:**

Mono  Avg

Mass Tol: 0.5

**Peak Assignment:**

Most Intense  Nearest Match

**Peak Labels:**

Ion  m/z

None

Width: 500

Height: 450

Click and drag in the plot to zoom X: Y:  Zoom Out   Enable tooltip

| b+        | b2+      | #  | Seq # | y+        | y2+      |
|-----------|----------|----|-------|-----------|----------|
| 100.0757  | 50.5415  | 1  | V 13  |           |          |
| 229.1183  | 115.0628 | 2  | E 12  | 1328.7365 | 659.8719 |
| 342.3023  | 171.6048 | 3  | L 11  | 1189.4039 | 395.3306 |
| 441.2769  | 221.1390 | 4  | V 10  | 1076.4099 | 538.8868 |
| 538.3235  | 269.6654 | 5  | P 8   | 977.5415  | 488.2744 |
| 636.3763  | 318.1918 | 6  | P 8   | 886.4887  | 448.7488 |
| 736.4240  | 368.7195 | 7  | T 7   | 783.4359  | 393.2218 |
| 833.4767  | 417.2428 | 8  | P 6   | 682.3883  | 343.6878 |
| 904.5138  | 452.7604 | 9  | A 8   | 585.3388  | 285.1714 |
| 1033.5564 | 517.2819 | 10 | E 4   | 514.2984  | 257.6528 |
| 1146.6405 | 573.8239 | 11 | T 3   | 385.3058  | 193.1315 |
| 1243.6933 | 622.3503 | 12 | P 2   | 272.1717  | 136.5895 |
|           |          | 13 | K 1   | 175.1190  | 88.0631  |

[Click] to move table

Static Modifications:

C: 57.0215

| Protein Probab. | Protein     | Tot. Peptides | Unique Peptides | Best Gene Name | Scan # | Charge | Delta Mass | Peptide Prophet Score | Peptide Sequence |
|-----------------|-------------|---------------|-----------------|----------------|--------|--------|------------|-----------------------|------------------|
| 0.8136          | IPI00002535 | 1             | 1               | FKBP2          | 2834   | 2+     | -0.0151    | 0.9805                | K.LVIPSELGYGER.G |

### Peptide Details

#### SHOW MODIFICATIONS :

|              |           |                |         |          |                                                                                       |
|--------------|-----------|----------------|---------|----------|---------------------------------------------------------------------------------------|
| Scan         | 2834      | Delta Mass     | -0.0151 | Protein  | IPI00002535                                                                           |
| Mass         | 1332.7160 | Next           | 266.000 | Fraction | VF_T13h_band06.mzXML                                                                  |
| Hyper        | 355.000   | PeptideProphet | 0.98    | Run      | VF_T13h_band06 pep.xml (Vitor/VF_T13h_band06 (VF_SSLAC_Assim(Window_NewPL_40a_Human)) |
| Protein Hits | 1         | Ion Percent    | 86%     |          |                                                                                       |
| Charge       | 2+        | B              | 1.000   |          |                                                                                       |

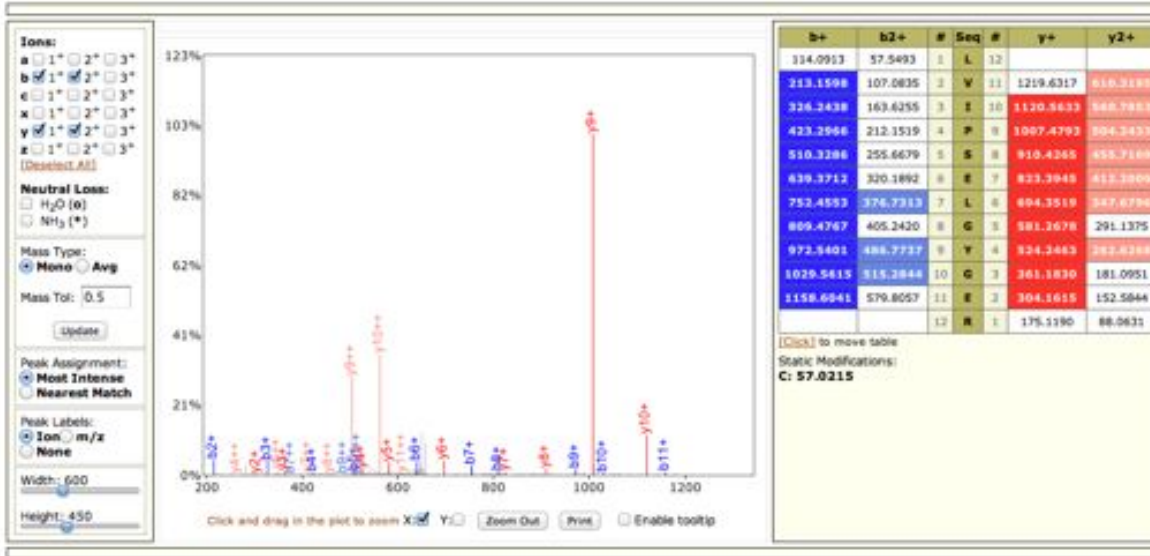



| Protein Probab. | Protein     | Tot. Peptides | Unique Peptides | Best Gene Name | Scan # | Charge | Delta Mass | Peptide Prophet Score | Peptide Sequence     |
|-----------------|-------------|---------------|-----------------|----------------|--------|--------|------------|-----------------------|----------------------|
| 0.9359          | IP100465436 | 1             | 1               | CAT            | 2846   | 2+     | -0.0210    | 0.9973                | R.LGPNYLHIPVNCYPYR.A |

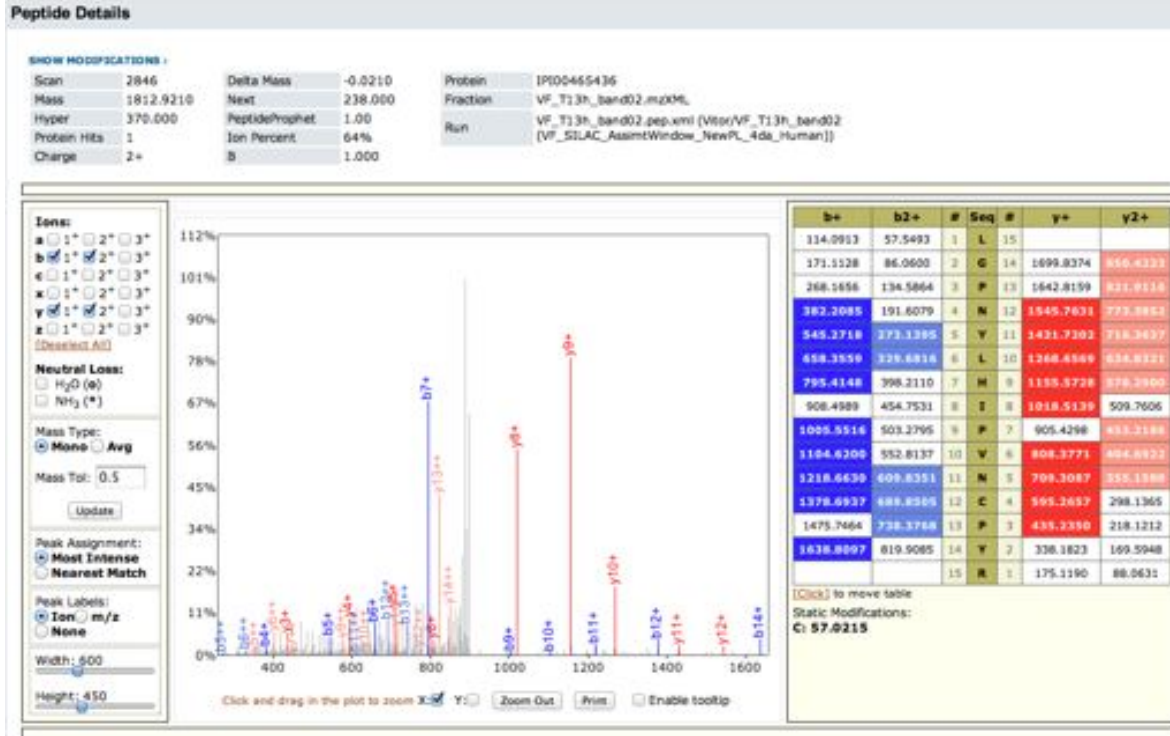

| Protein Probab. | Protein                                     | Tot. Peptides | Unique Peptides | Best Gene Name                | Scan# | Charge | Delta Mass | Peptide Prophet Score | Peptide Sequence  |
|-----------------|---------------------------------------------|---------------|-----------------|-------------------------------|-------|--------|------------|-----------------------|-------------------|
| 0.9837          | IPI00792971,<br>IPI00909577,<br>IPI00030702 | 1             | 1               | DKFZp761L1216,<br>-,<br>IDH3A | 2888  | 2+     | -0.0114    | 0.9999                | K.TPYTDVNIIVTIR.E |

### Peptide Details

#### Peptide Details

##### SHOW MODIFICATIONS

|              |           |                |         |          |                                                                                      |
|--------------|-----------|----------------|---------|----------|--------------------------------------------------------------------------------------|
| Scan         | 2888      | Delta Mass     | -0.0114 | Protein  | IPI00030702                                                                          |
| Mass         | 1391.7530 | Next           | 295.000 | Fraction | VF_T13h_band04.mzXML                                                                 |
| Hyper        | 592.000   | PeptideProphet | 1.00    | Run      | VF_T13h_band04 pep.xml (Vitor/VF_T13h_band04 (VF_SILAC_AssmtWindow_NewPL_4da_Human)) |
| Protein Hits | 3         | Ion Percent    | 91%     |          |                                                                                      |
| Charge       | 2+        | B              | 1.000   |          |                                                                                      |

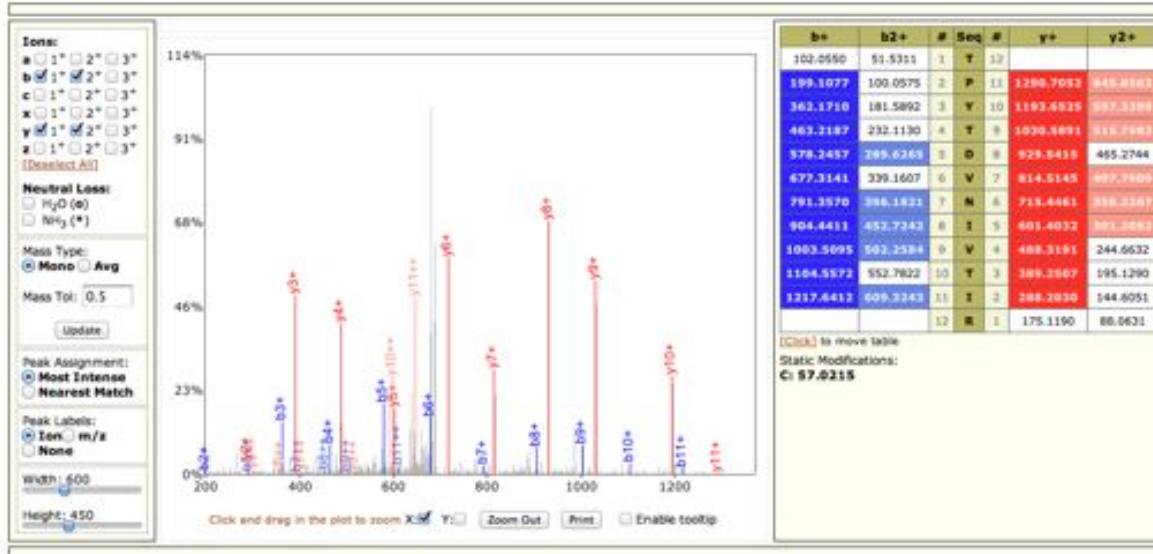

| Protein Probab. | Protein     | Tot. Peptides | Unique Peptides | Best Gene Name | Scan # | Charge | Delta Mass | Peptide Prophet Score | Peptide Sequence |
|-----------------|-------------|---------------|-----------------|----------------|--------|--------|------------|-----------------------|------------------|
| 0.8924          | IPI00465361 | 1             | 1               | RPL13          | 2895   | 2+     | -0.0099    | 0.9901                | R.GFSLEELR.V     |

### Peptide Details

#### SHOW MODIFICATIONS

|                 |                      |                                                   |
|-----------------|----------------------|---------------------------------------------------|
| Scan: 2895      | Delta Mass: -0.0099  | Protein: IPI00465361                              |
| Mass: 950.4940  | Next: 273.000        | Fraction: VF_T13h_band06.mzXML                    |
| Hyper: 376.000  | PeptideProphet: 0.99 | Run: VF_T13h_band06.pep.xml (Vitor/VF_T13h_band06 |
| Protein Hits: 1 | Ion Percent: 86%     | [VF_SILAC_AssimWindow_NewPL_4da_Human])           |
| Charge: 2+      | B: 1.000             |                                                   |

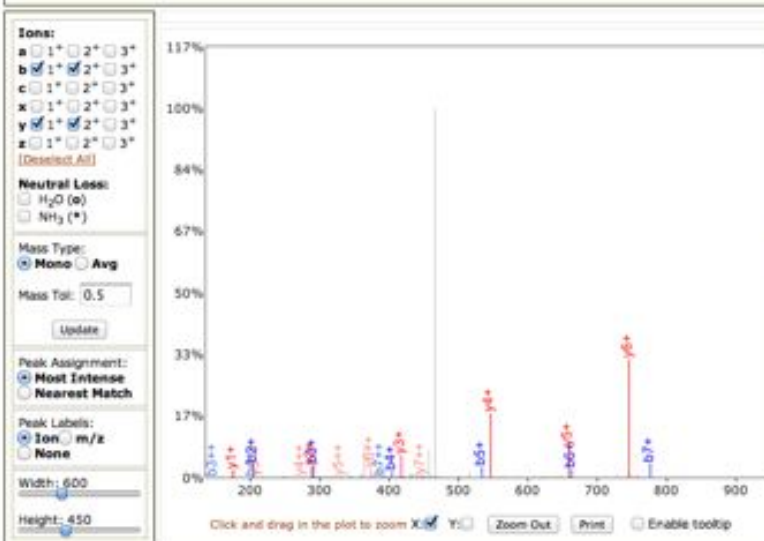

| b+       | b2+      | # | Seq # | y+       | y2+      |
|----------|----------|---|-------|----------|----------|
| 56.0287  | 29.5180  | 1 | G 8   |          |          |
| 188.8972 | 103.0522 | 2 | F 7   | 893.4727 | 447.3408 |
| 292.1292 | 146.5682 | 3 | S 6   | 746.4043 | 373.7838 |
| 495.2132 | 203.1103 | 4 | L 5   | 659.3723 | 329.1888 |
| 534.3558 | 267.6316 | 5 | E 4   | 946.3883 | 373.6477 |
| 663.2984 | 332.1529 | 6 | E 3   | 417.2456 | 309.1264 |
| 776.3825 | 388.6948 | 7 | L 2   | 388.2030 | 144.6051 |
|          |          | 8 | R 1   | 175.1190 | 88.0631  |

[\[Click\]](#) to move table

Static Modifications:

**C: 57.0215**

| Protein Probab. | Protein                                                     | Tot. Peptides | Unique Peptides | Best Gene Name               | Scan # | Charge | Delta Mass | Peptide Prophet Score | Peptide Sequence    |
|-----------------|-------------------------------------------------------------|---------------|-----------------|------------------------------|--------|--------|------------|-----------------------|---------------------|
| 0.9837          | IPI00909970,<br>IPI00023748,<br>IPI00797259,<br>IPI00797126 | 1             | 1               | -,<br>NACA,<br>NACA,<br>NACA | 2900   | 2+     | -0.0177    | 0.9999                | K.SPASDTYIVFGEAK'.I |

### Peptide Details

#### SHOW MODIFICATIONS -

|              |           |                |         |          |                                                                                         |
|--------------|-----------|----------------|---------|----------|-----------------------------------------------------------------------------------------|
| Scan         | 2900      | Delta Mass     | -0.0177 | Protein  | IPI00023748                                                                             |
| Mass         | 1490.7470 | Next           | 315.000 | Fraction | VF_T13f_band04.mzXML                                                                    |
| Hyper        | 618.000   | PeptideProphet | 1.00    | Run      | VF_T13f_band04.pep.xml (Vitar/VF_T13f_band04<br>[VF_SILAC_AssmtWindow_NewPL_4ds_human]) |
| Protein Hits | 4         | Ion Percent    | 85%     |          |                                                                                         |
| Charge       | 2+        | B              | 1.000   |          |                                                                                         |

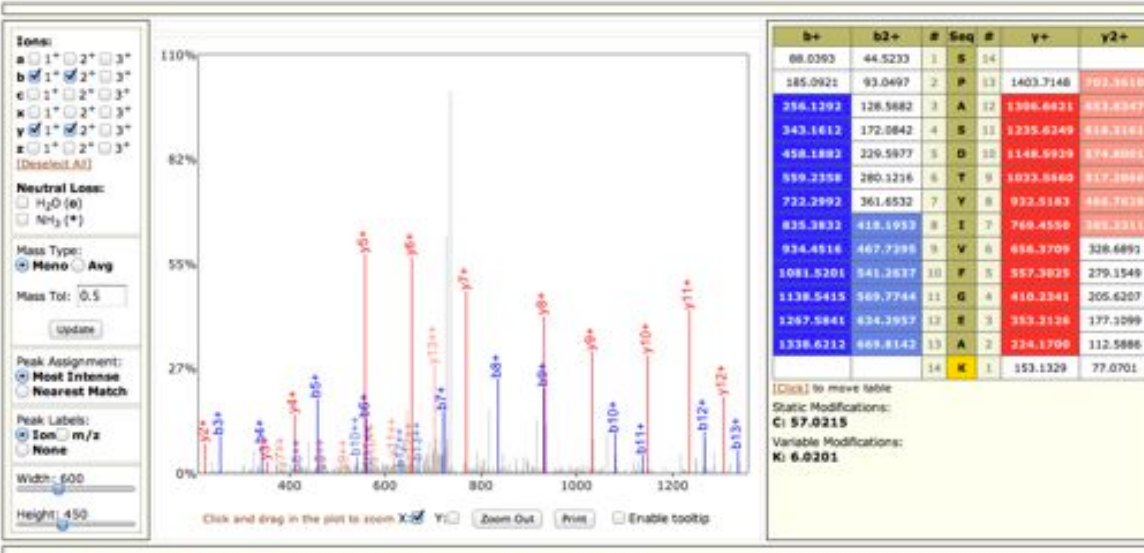

[Click] to move table

Static Modifications:  
C: 57.0215

Variable Modifications:  
K: 6.0201

| Protein Probab. | Protein                                                                                                     | Tot. Peptides | Unique Peptides | Best Gene Name                                                 | Scan # | Charge | Delta Mass | Peptide Prophet Score | Peptide Sequence |
|-----------------|-------------------------------------------------------------------------------------------------------------|---------------|-----------------|----------------------------------------------------------------|--------|--------|------------|-----------------------|------------------|
| 0.9592          | IPI00443537,<br>IPI00877095,<br>IPI00419604,<br>IPI00385965,<br>IPI00848151,<br>IPI00444090,<br>IPI00307749 | 1             | 1               | NDUFS7,<br>-,<br>NDUFS7,<br>NDUFS7,<br>-,<br>NDUFS7,<br>NDUFS7 | 2909   | 2+     | -0.0150    | 0.9976                | K.LDDLNVNWAR.R   |

### Peptide Details

#### SHOW MODIFICATIONS

|              |           |                |         |          |                                                                                         |
|--------------|-----------|----------------|---------|----------|-----------------------------------------------------------------------------------------|
| Scan         | 2909      | Delta Mass     | -0.0150 | Protein  | IPI00307749                                                                             |
| Mass         | 1101.5690 | Next           | 286.000 | Fraction | VF_T13h_band05.mzXML                                                                    |
| Hyper        | 406.000   | PeptideProphet | 1.00    | Run      | VF_T13h_band05.pep.xml (Vtor/VF_T13h_band05<br>[VF_SILAC_AssimtWindow_NewPL_4da_Human]) |
| Protein Hits | 7         | Ion Percent    | 88%     |          |                                                                                         |
| Charge       | 2+        | B              | 1.000   |          |                                                                                         |

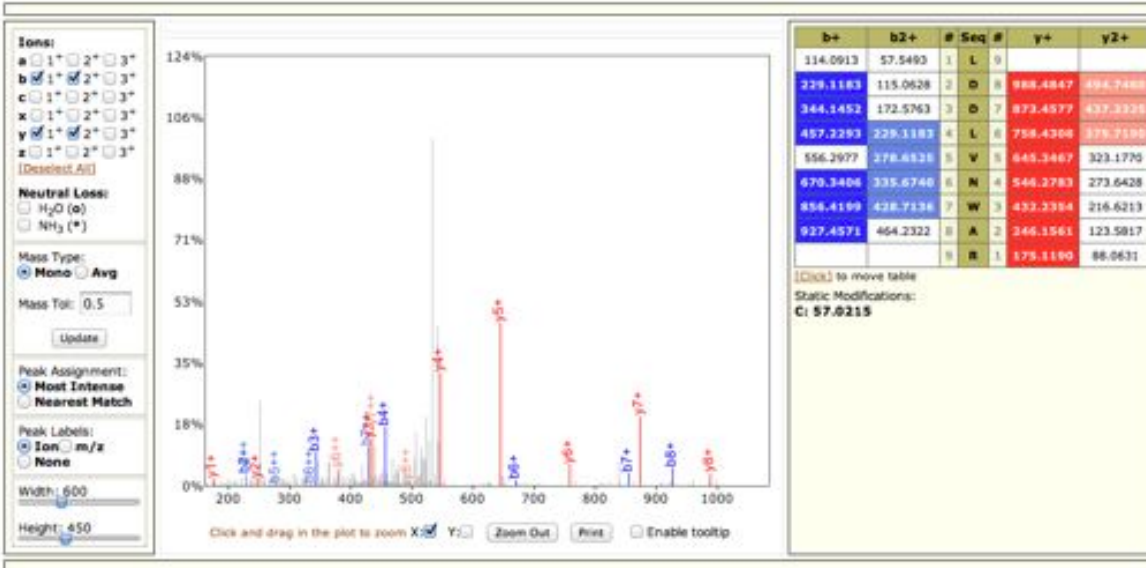

| Protein Probab. | Protein     | Tot. Peptides | Unique Peptides | Best Gene Name | Scan # | Charge | Delta Mass | Peptide Prophet Score | Peptide Sequence |
|-----------------|-------------|---------------|-----------------|----------------|--------|--------|------------|-----------------------|------------------|
| 0.9838          | IP100293276 | 1             | 1               | MIF            | 2909   | 2+     | -0.0119    | 0.9995                | K.LLCGLLAER.L    |

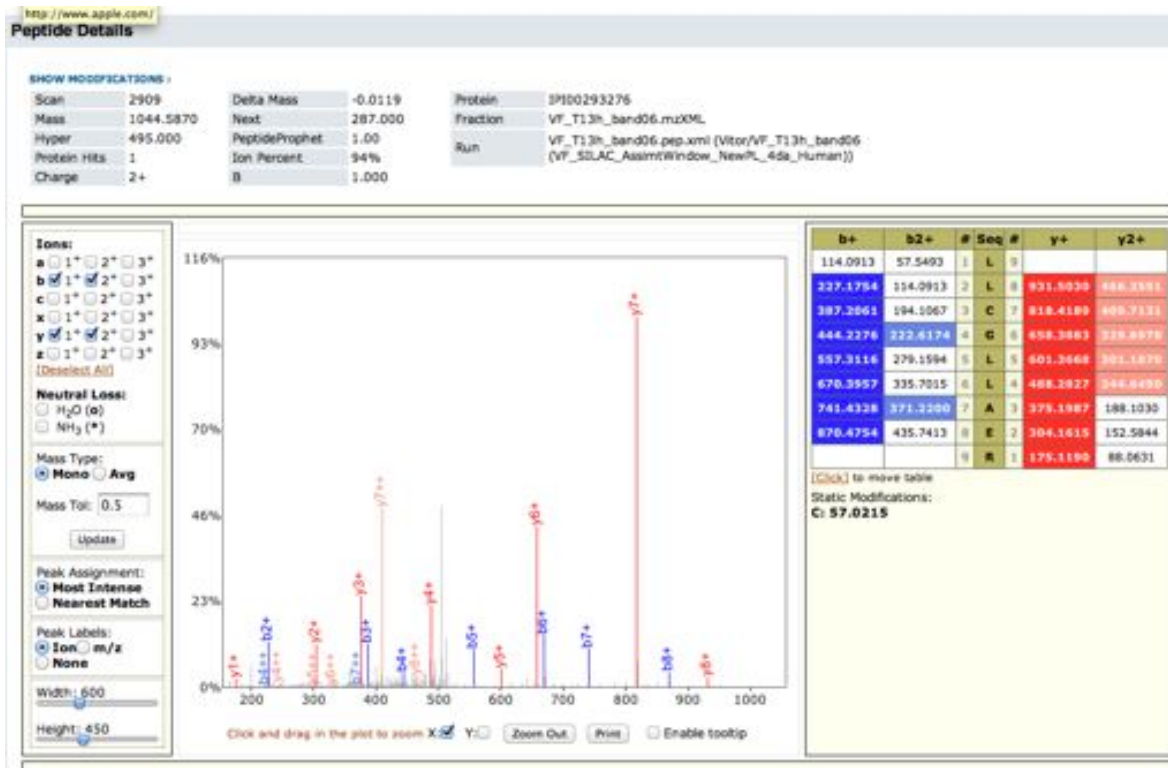

| Protein Probab. | Protein                                                                                                                                                                                                                                                                                                                                          | Tot. Peptides | Unique Peptides | Best Gene Name                                                                                                                                                | Scan# | Charge | Delta Mass | Peptide Prophet Score | Peptide Sequence      |
|-----------------|--------------------------------------------------------------------------------------------------------------------------------------------------------------------------------------------------------------------------------------------------------------------------------------------------------------------------------------------------|---------------|-----------------|---------------------------------------------------------------------------------------------------------------------------------------------------------------|-------|--------|------------|-----------------------|-----------------------|
| 0.9837          | IPI00792139, IPI00654754, IPI00798155, IPI00793330, IPI00456429, IPI00789823, IPI00784990, IPI00796007, IPI00179330, IPI00794211, IPI00796600, IPI00797400, IPI00793810, IPI00795527, IPI00794925, IPI00790633, IPI00418813, IPI00719280, IPI00794205, IPI00789107, IPI00793729, IPI00792712, IPI00743241, IPI00743650, IPI00744274, IPI00798127 | 1             | 1               | RPS27A, RPS27A, RPS27A, RPS27A, UBA52, RPS27A, UBC, RPS27A, RPS27A, RPS27A, RPS27A, RPS27A, RPS27A, -, UBB, -, RPS27A, RPS27A, RPS27A, RPS27A, RPS27A, RPS27A | 2942  | 2+     | -0.0182    | 0.9999                | K.TITLEVEPSDTIENVK'.A |

### Peptide Details

#### Peptide Details

SHOW MODIFICATIONS

|              |           |                |         |
|--------------|-----------|----------------|---------|
| Scan         | 2942      | Delta Mass     | -0.0182 |
| Mass         | 1793.9470 | Next           | 316.000 |
| Hyper        | 582.000   | PeptideProphet | 1.00    |
| Protein Hits | 69        | Ion Percent    | 83%     |
| Charge       | 2+        | S              | 1.000   |

|          |                                                                                     |
|----------|-------------------------------------------------------------------------------------|
| Protein  | IPI00179330                                                                         |
| Fraction | VF_T13h_band04.mz006                                                                |
| Run      | VF_T13h_band04.pep.xml (Vitor/VF_T13h_band04 (VF_SLAC_AssmtWindow_NewPL_4da_Human)) |

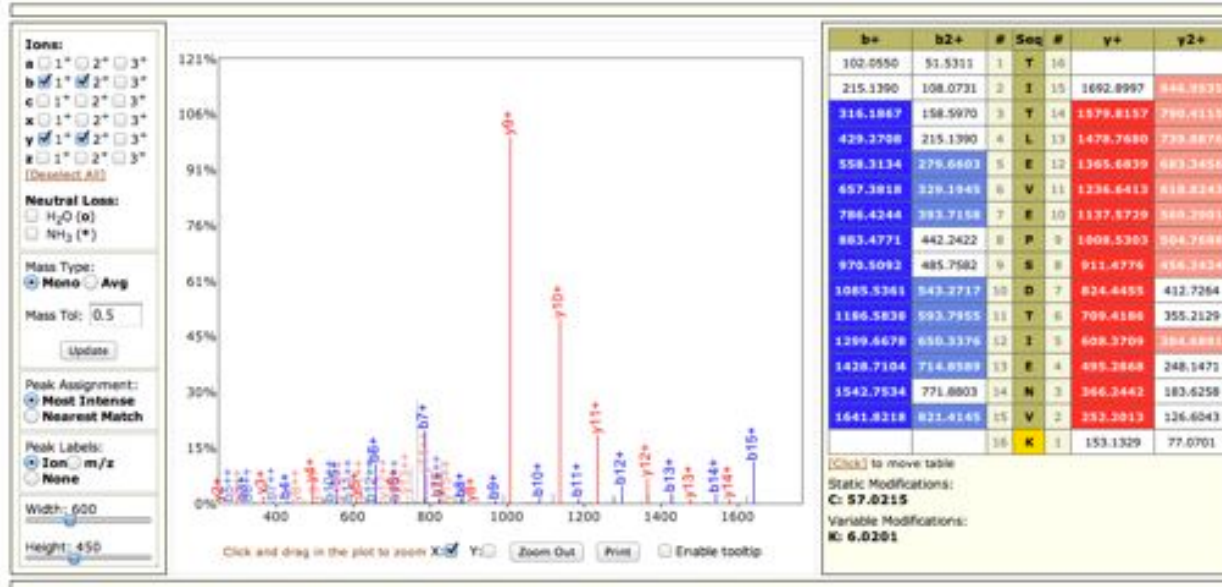

| Protein Probab. | Protein     | Tot. Peptides | Unique Peptides | Best Gene Name | Scan # | Charge | Delta Mass | Peptide Prophet Score | Peptide Sequence   |
|-----------------|-------------|---------------|-----------------|----------------|--------|--------|------------|-----------------------|--------------------|
| 0.9870          | IPI00001589 | 1             | 1               | TIMM13         | 2956   | 2+     | -0.0172    | 0.9998                | K.VQIAVANAQELLQR.M |

Peptide Details

SHOW MODIFICATIONS

|              |           |                 |         |          |                                                                                      |
|--------------|-----------|-----------------|---------|----------|--------------------------------------------------------------------------------------|
| Scan         | 2956      | Delta Mass      | -0.0172 | Protein  | IPI00001589                                                                          |
| Mass         | 1552.8810 | Next            | 334.000 | Fraction | VF_T13h_band06.mzXML                                                                 |
| Hyper        | 608.000   | Peptide/Prophet | 1.00    | Run      | VF_T13h_band06.pep.xml (Vtor/VF_T13h_band06 (VF_SILAC_AssimtWindow_NewPL_4da_Human)) |
| Protein Hits | 1         | Ion Percent     | 88%     |          |                                                                                      |
| Charge       | 2+        | B               | 1.000   |          |                                                                                      |

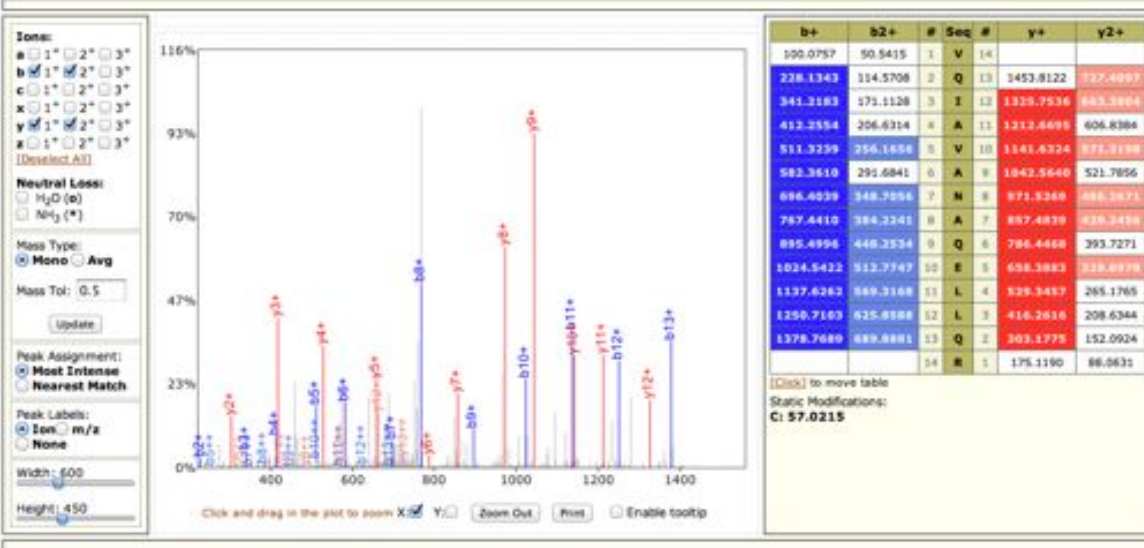



| Protein Probab. | Protein     | Tot. Peptides | Unique Peptides | Best Gene Name | Scan # | Charge | Delta Mass | Peptide Prophet Score | Peptide Sequence          |
|-----------------|-------------|---------------|-----------------|----------------|--------|--------|------------|-----------------------|---------------------------|
| 0.9877          | IPI00219381 | 1             | 1               | NDUFA2         | 2995   | 2+     | -0.0247    | 1.0000                | R.YAFGQETNVPLNNFSADQVTR.A |

Peptide Details

SHOW MODIFICATIONS Peptide Details

|              |           |                |         |          |                                                                                        |
|--------------|-----------|----------------|---------|----------|----------------------------------------------------------------------------------------|
| Scan         | 2995      | Delta Mass     | -0.0247 | Protein  | IPI00219381                                                                            |
| Mass         | 2371.1310 | Next           | 295.000 | Fraction | VF_T1.3h_band05_mzXML                                                                  |
| Hyper        | 731.000   | PeptideProphet | 1.00    | Run      | VF_T1.3h_band05.pep.xml (Vitor/VF_T1.3h_band05 (VF_SILAC_AssmtWindow_NewPL_4da_Human)) |
| Protein Hits | 1         | Ion Percent    | 80%     |          |                                                                                        |
| Charge       | 2+        | B              | 1.000   |          |                                                                                        |

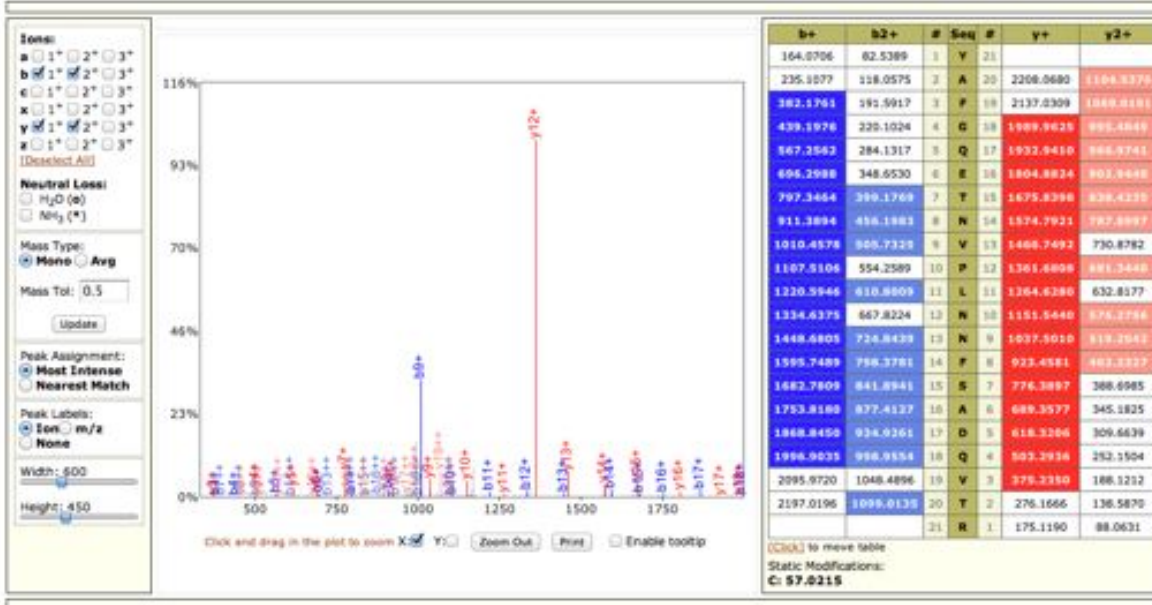

| Protein Probab. | Protein                     | Tot. Peptides | Unique Peptides | Best Gene Name | Scan # | Charge | Delta Mass | Peptide Prophet Score | Peptide Sequence |
|-----------------|-----------------------------|---------------|-----------------|----------------|--------|--------|------------|-----------------------|------------------|
| 0.9819          | IP100335277,<br>IP100009507 | 1             | 1               | SYPL,<br>SYPL  | 3020   | 2+     | -0.0126    | 1.0000                | K.TVTATFGYPFR.L  |

### Peptide Details

#### SHOW MODIFICATIONS

|              |           |                |         |          |                                                                                        |
|--------------|-----------|----------------|---------|----------|----------------------------------------------------------------------------------------|
| Scan         | 3020      | Delta Mass     | -0.0126 | Protein  | IP100009507                                                                            |
| Mass         | 1259.6420 | Next           | 268.000 | Fraction | VF_T13h_band02.mzXML                                                                   |
| Hyper        | 561.000   | PeptideProphet | 1.00    | Run      | VF_T13h_band02 pep.xml (Vkor/VF_T13h_band02<br>{VF_SILAC_AssmtWindow_NewPL_4da_Human}) |
| Protein Hits | 2         | Ion Percent    | 85%     |          |                                                                                        |
| Charge       | 2+        | a              | 1.000   |          |                                                                                        |

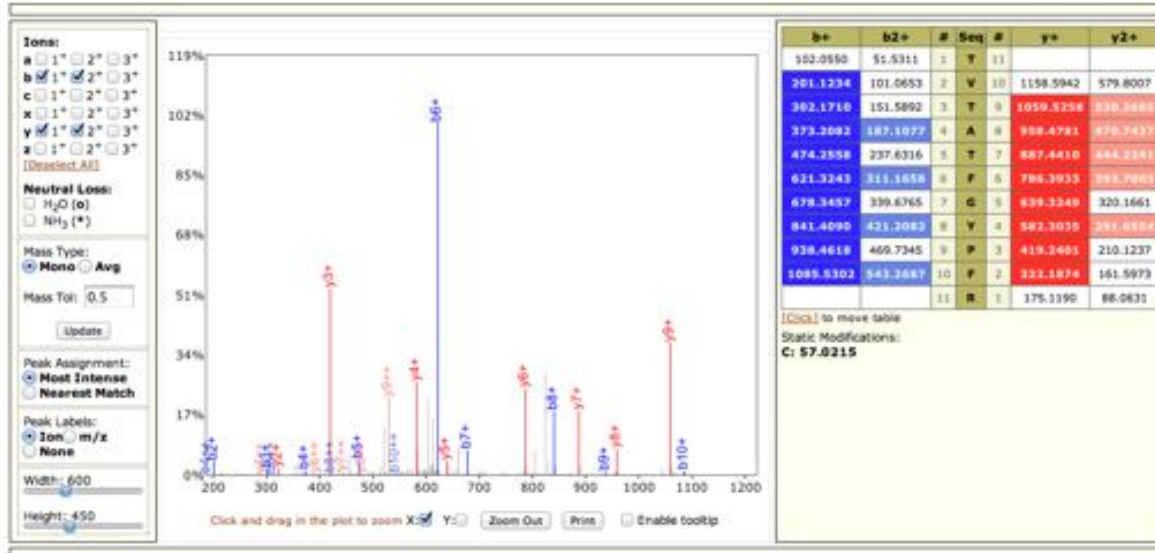

| Protein Probab. | Protein                                                                                                                     | Tot. Peptides | Unique Peptides | Best Gene Name                                      | Scan # | Charge | Delta Mass | Peptide Prophet Score | Peptide Sequence     |
|-----------------|-----------------------------------------------------------------------------------------------------------------------------|---------------|-----------------|-----------------------------------------------------|--------|--------|------------|-----------------------|----------------------|
| 0.9575          | IPI00792509,<br>IPI00795682,<br>IPI00791211,<br>IPI00791780,<br>IPI00795080,<br>IPI00383539,<br>IPI00793839,<br>IPI00025366 | 1             | 1               | CS,<br>CS,<br>CS,<br>CS,<br>CS,<br>CS,<br>CS,<br>CS | 3051   | 2+     | -0.0197    | 0.9986                | K.GLVYETSVLDPDEGIR.F |

Peptide Details

SHOW H Peptide Details

|              |           |                |         |          |                                                                                     |
|--------------|-----------|----------------|---------|----------|-------------------------------------------------------------------------------------|
| Scan         | 3051      | Delta Mass     | -0.0197 | Protein  | IPI00025366                                                                         |
| Mass         | 1762.8860 | Next           | 245.000 | Fraction | VF_T13h_band02.mzXML                                                                |
| Hyper        | 393.000   | PeptideProphet | 1.00    | Run      | VF_T13h_band02.pep.xml (Vitor/VF_T13h_band02 (VF_SILAC_AssimWindow_NewR_4da_Human)) |
| Protein Hits | 8         | Ion Percent    | 57%     |          |                                                                                     |
| Charge       | 2+        | S              | 1.000   |          |                                                                                     |

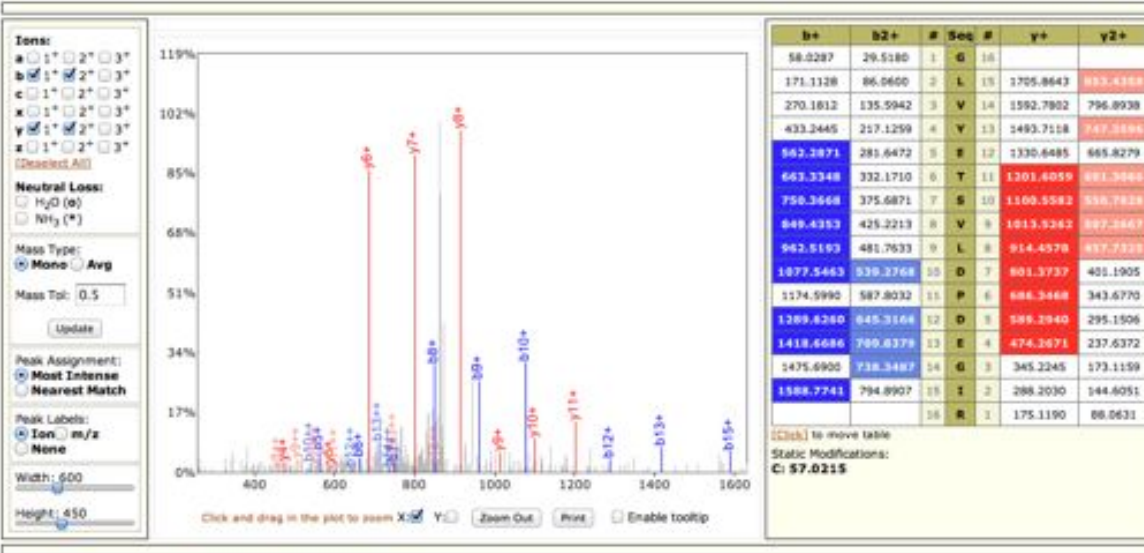

| Protein Probab. | Protein     | Tot. Peptides | Unique Peptides | Best Gene Name | Scan # | Charge | Delta Mass | Peptide Prophet Score | Peptide Sequence |
|-----------------|-------------|---------------|-----------------|----------------|--------|--------|------------|-----------------------|------------------|
| 0.9179          | IPI00453473 | 1             | 1               | HIST1H4I       | 3081   | 2+     | -0.0109    | 0.9951                | K.VFLENVIR.D     |

### Peptide Details

#### Peptide Details

##### SHOW MODIFICATIONS

|              |          |                |         |
|--------------|----------|----------------|---------|
| Scan         | 3081     | Delta Mass     | -0.0109 |
| Mass         | 989.5780 | Next           | 391.000 |
| Hyper        | 479.000  | PeptideProphet | 1.00    |
| Protein Hits | 1        | Ion Percent    | 86%     |
| Charge       | 2+       | B              | 1.000   |

|          |                                                                                      |
|----------|--------------------------------------------------------------------------------------|
| Protein  | IPI00453473                                                                          |
| Fraction | VF_T13h_band04.mzXML                                                                 |
| Run      | VF_T13h_band04.pep.xml [Vitor/VF_T13h_band04 (VF_SILAC_AssmtWindow_NewPL_4da_Human)] |

##### Ions:

- 1<sup>+</sup>  2<sup>+</sup>  3<sup>+</sup>  
 1<sup>+</sup>  2<sup>+</sup>  3<sup>+</sup>

[Detect All]

##### Neutral Loss:

- H<sub>2</sub>O (\*)  
 NH<sub>3</sub> (\*)

##### Mass Type:

- Mono  Avg

Mass Tol: 0.5

Update

##### Peak Assignment:

- Most Intense  Nearest Match

##### Peak Labels:

- Ion  m/z

Width: 500

Height: 450

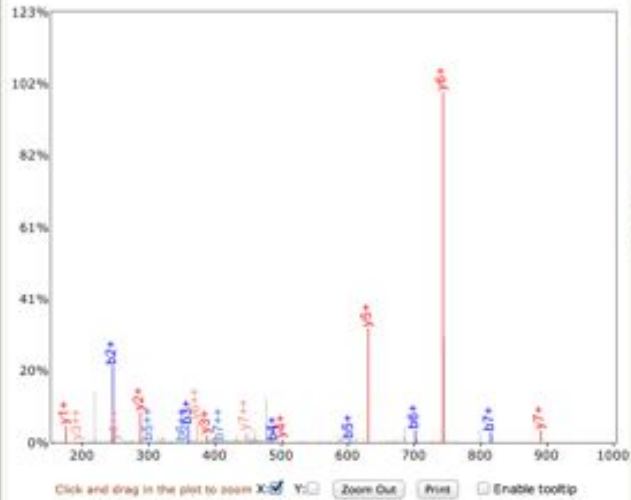

| b+       | b2+      | # | Seq # | y+       | y2+      |
|----------|----------|---|-------|----------|----------|
| 100.0757 | 50.5415  | 1 | V R   |          |          |
| 247.1441 | 124.0757 | 2 | F T   | 890.6094 | 445.7584 |
| 369.2282 | 180.6177 | 3 | L E   | 743.4410 | 372.3241 |
| 489.2708 | 245.1399 | 4 | E S   | 630.3570 | 315.0821 |
| 603.3137 | 302.1608 | 5 | N A   | 501.3144 | 251.1604 |
| 702.3821 | 351.6947 | 6 | V T   | 387.2714 | 194.1394 |
| 815.4662 | 408.2367 | 7 | I T   | 288.2030 | 144.0051 |
|          |          | 8 | R K   | 179.1190 | 88.0631  |

[Click] to move table

Static Modifications:

C: 57.0215

| Protein Probab. | Protein                     | Tot. Peptides | Unique Peptides | Best Gene Name | Scan # | Charge | Delta Mass | Peptide Prophet Score | Peptide Sequence |
|-----------------|-----------------------------|---------------|-----------------|----------------|--------|--------|------------|-----------------------|------------------|
| 0.9869          | IPI00335277,<br>IPI00009507 | 1             | 1               | SYPL,<br>SYPL  | 3083   | 2+     | -0.0141    | 0.9999                | K.TVTATFGYPFR.L  |

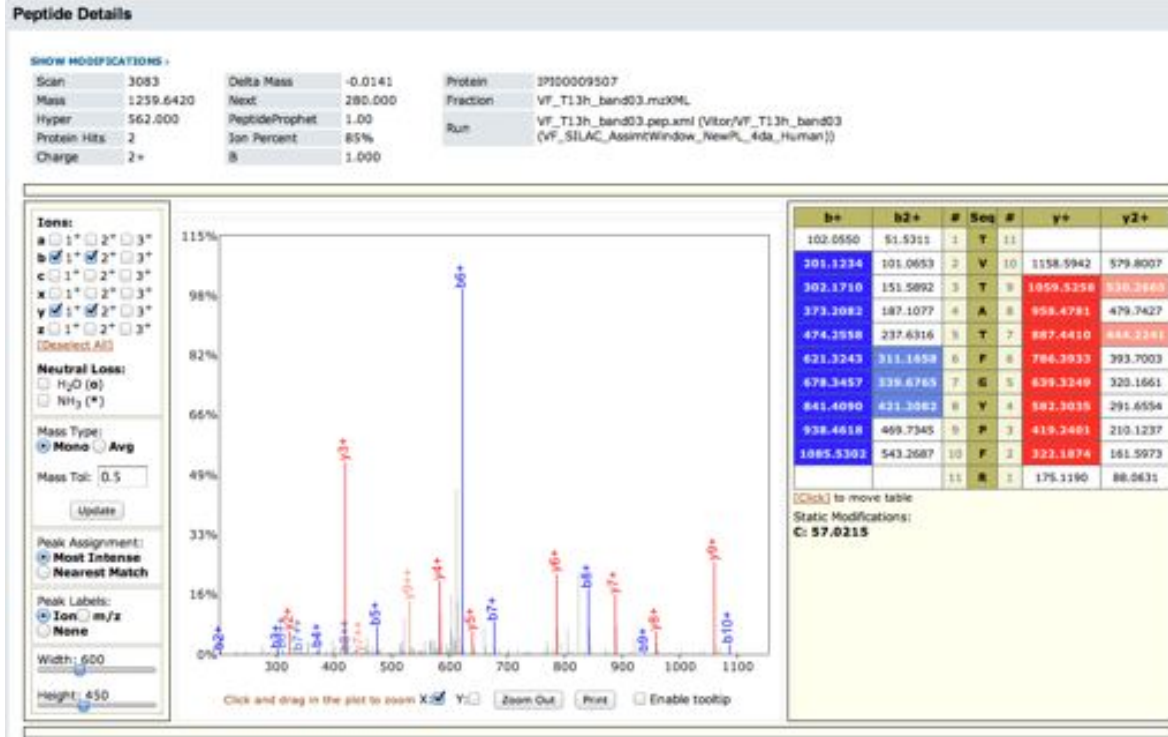

| Protein Probab. | Protein                     | Tot. Peptides | Unique Peptides | Best Gene Name  | Scan # | Charge | Delta Mass | Peptide Prophet Score | Peptide Sequence        |
|-----------------|-----------------------------|---------------|-----------------|-----------------|--------|--------|------------|-----------------------|-------------------------|
| 0.9869          | IPI00550291,<br>IPI00329650 | 1             | 1               | NUP35,<br>NUP35 | 3095   | 2+     | -0.0210    | 0.9999                | R.SIYDDISSPGLGSTPLTSR.R |

### Peptide Details

#### SHOW MODIFICATIONS

|              |           |                 |         |          |                                                                                         |
|--------------|-----------|-----------------|---------|----------|-----------------------------------------------------------------------------------------|
| Scan         | 3095      | Delta Mass      | -0.0210 | Protein  | IPI00329650                                                                             |
| Mass         | 1965.9760 | Next            | 241.000 | Fraction | VF_T13h_band03.mzXML                                                                    |
| Hyper        | 495.000   | Peptide/Prophet | 1.00    | Run      | VF_T13h_band03.dep.xml (Vitor/VF_T13h_band03<br>[VF_SILAC_AssmtWindow_NewPL_4ds_Human]) |
| Protein Hits | 2         | Ion Percent     | 75%     |          |                                                                                         |
| Charge       | 2+        | B               | 1.000   |          |                                                                                         |

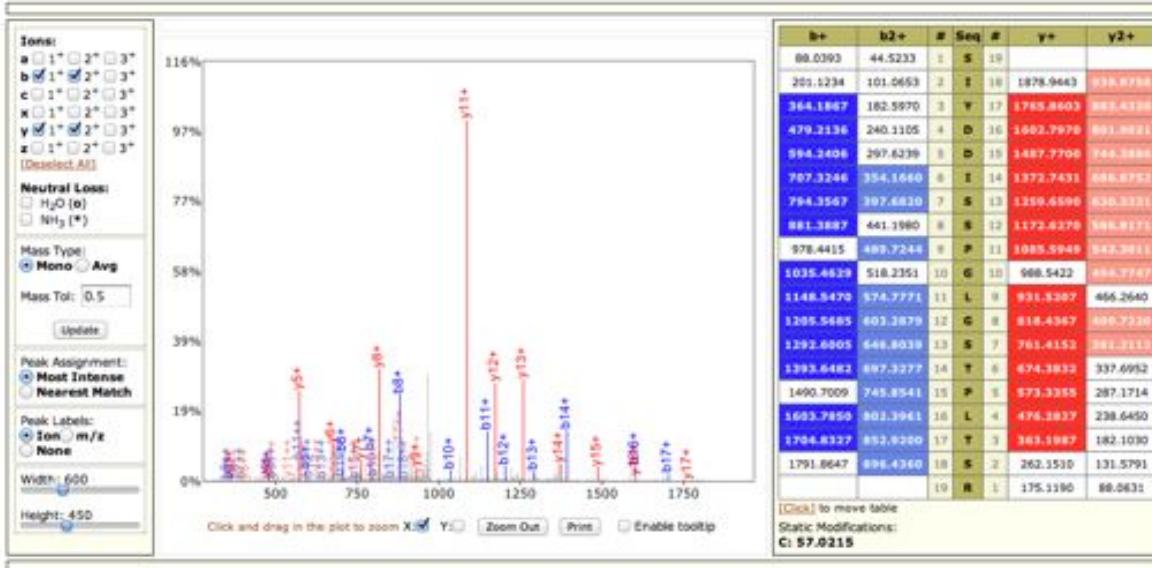

| Protein Probab. | Protein                     | Tot. Peptides | Unique Peptides | Best Gene Name | Scan # | Charge | Delta Mass | Peptide Prophet Score | Peptide Sequence |
|-----------------|-----------------------------|---------------|-----------------|----------------|--------|--------|------------|-----------------------|------------------|
| 0.9775          | IPI00908304,<br>IPI00031697 | 1             | 1               | -,<br>TMEM109  | 3098   | 2+     | -0.0141    | 0.9989                | R.EAPVDVLTQIGR.S |

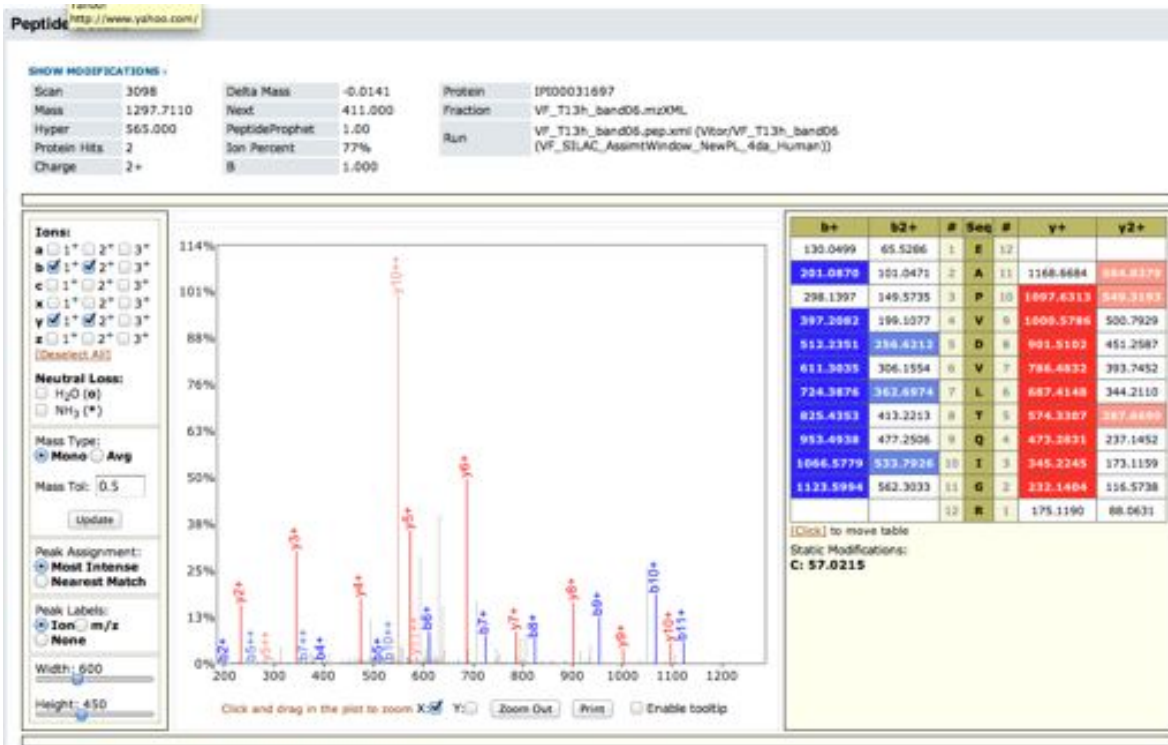

| Protein Probab. | Protein     | Tot. Peptides | Unique Peptides | Best Gene Name | Scan # | Charge | Delta Mass | Peptide Prophet Score | Peptide Sequence          |
|-----------------|-------------|---------------|-----------------|----------------|--------|--------|------------|-----------------------|---------------------------|
| 0.9869          | IPI00216393 | 1             | 1               | CLTA           | 3129   | 2+     | -0.0277    | 0.9999                | R.AAEEAFVNDIDESSPGTEWER.V |

Peptide Details

SHOW MODIFICATIONS

|              |           |                |         |          |                                                                                      |
|--------------|-----------|----------------|---------|----------|--------------------------------------------------------------------------------------|
| Scan         | 3129      | Delta Mass     | -0.0277 | Protein  | IPI00216393                                                                          |
| Mass         | 2352.0260 | Next           | 377.000 | Fraction | VF_T13h_band03.mzXML                                                                 |
| Hyper        | 640.000   | PeptideProphet | 1.00    | Run      | VF_T13h_band03.pep.xml (Vitor/VF_T13h_band03 [VF_SILAC_AsimrWindow_NewPL_4da_Human]) |
| Protein Hits | 1         | Ion Percent    | 60%     |          |                                                                                      |
| Charge       | 2+        | B              | 1.000   |          |                                                                                      |

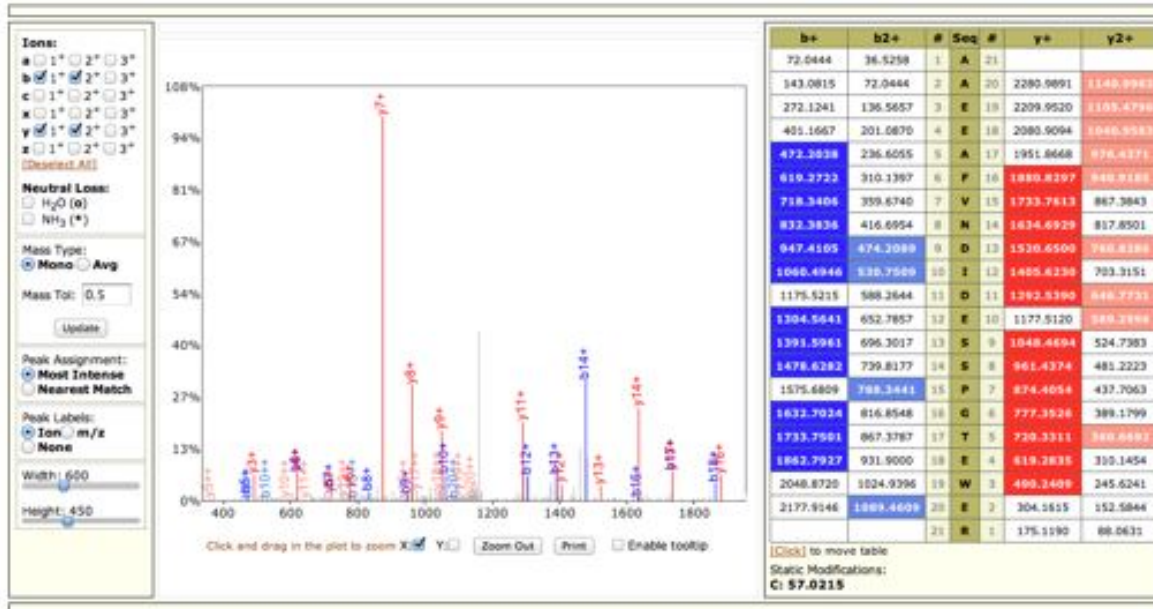



| Protein Probab. | Protein                     | Tot. Peptides | Unique Peptides | Best Gene Name | Scan # | Charge | Delta Mass | Peptide Prophet Score | Peptide Sequence |
|-----------------|-----------------------------|---------------|-----------------|----------------|--------|--------|------------|-----------------------|------------------|
| 0.9750          | IP100335277,<br>IP100009507 | 1             | 1               | SYPL,<br>SYPL  | 3178   | 2+     | -0.0171    | 0.9993                | K.TVTATFGYPFR.L  |

### Peptide Details

#### SHOW MODIFICATIONS

|              |           |                |         |          |                                                                                         |
|--------------|-----------|----------------|---------|----------|-----------------------------------------------------------------------------------------|
| Scan         | 3178      | Delta Mass     | -0.0171 | Protein  | IP100009507                                                                             |
| Mass         | 1259.6420 | Next           | 268.000 | Fraction | VF_T13h_band04.mzXML                                                                    |
| Hyper        | 432.000   | PeptideProphet | 1.00    | Run      | VF_T13h_band04.pep.xml (Vitor/VF_T13h_band04<br>(VF_SILAC_AssmtWindow_NewPL_4da_Human)) |
| Protein Hits | 2         | Ion Percent    | 85%     |          |                                                                                         |
| Charge       | 2+        | g              | 1.000   |          |                                                                                         |

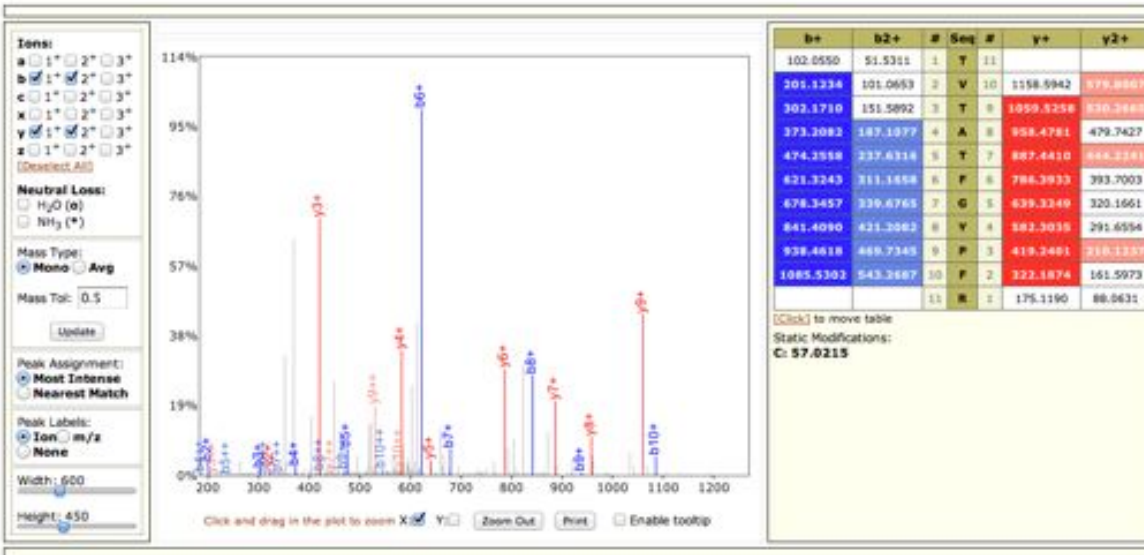

Click to move table

Static Modifications:

C: 57.0215

| Protein Probab. | Protein     | Tot. Peptides | Unique Peptides | Best Gene Name | Scan # | Charge | DeltaMass | PeptideProphet Score | Peptide Sequence  |
|-----------------|-------------|---------------|-----------------|----------------|--------|--------|-----------|----------------------|-------------------|
| 0.9552          | IPI00060627 | 1             | 1               | CCDC124        | 3202   | 2+     | -0.0136   | 0.9979               | R.AAFTAFEEAQLPR.L |

Peptide Details

Peptide Details

SHOW MODIFICATIONS :

|              |           |                |         |          |                                                                                      |
|--------------|-----------|----------------|---------|----------|--------------------------------------------------------------------------------------|
| Scan         | 3202      | Delta Mass     | -0.0136 | Protein  | IPI00060627                                                                          |
| Mass         | 1450.7330 | Next           | 343.000 | Fraction | VF_T13h_band04.mzXML                                                                 |
| Hyper        | 464.000   | PeptideProphet | 1.00    | Run      | VF_T13h_band04 pep.xml (Vitor/VF_T13h_band04 (VF_SLAC_AssimtWindow_NewPL_4da_Human)) |
| Protein Hits | 1         | Ion Percent    | 83%     |          |                                                                                      |
| Charge       | 2+        | B              | 1.000   |          |                                                                                      |

**Ions:**  
 1<sup>+</sup>  2<sup>+</sup>  3<sup>+</sup>  
 1<sup>+</sup>  2<sup>+</sup>  3<sup>+</sup>  
[DeSelect All]

**Neutral Loss:**  
 H<sub>2</sub>O (0)  
 NH<sub>3</sub> (\*)

**Mass Type:**  
 Mono  Avg

Mass Tol: 0.5

**Peak Assignment:**  
 Most Intense  Nearest Match

**Peak Labels:**  
 Ion m/x  None

Width: 600  
 Height: 450

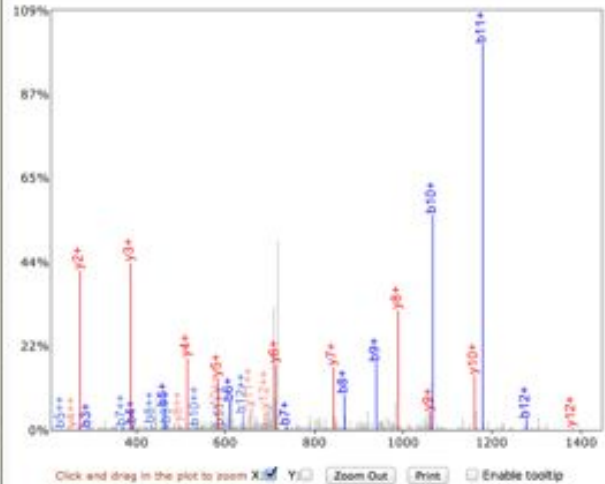

| b+        | b2+      | #  | Seq # | y+        | y2+      |
|-----------|----------|----|-------|-----------|----------|
| 72.0444   | 36.5258  | 1  | A 13  |           |          |
| 143.0815  | 72.0444  | 2  | A 12  | 1779.4954 | 890.2513 |
| 290.1499  | 145.5786 | 3  | F 11  | 1308.6583 | 694.8339 |
| 391.1976  | 196.1024 | 4  | T 10  | 1161.5899 | 581.2688 |
| 462.2347  | 231.6210 | 5  | A 9   | 1060.5422 | 530.7747 |
| 609.3031  | 305.1552 | 6  | F 8   | 889.5051  | 495.2562 |
| 738.3457  | 369.6765 | 7  | E 7   | 842.4367  | 421.7220 |
| 887.3883  | 434.1978 | 8  | E 6   | 713.3941  | 357.2007 |
| 938.4254  | 469.7163 | 9  | A 5   | 584.3815  | 292.6794 |
| 1064.4840 | 533.7416 | 10 | Q 4   | 513.3144  | 257.1608 |
| 1179.5481 | 590.3877 | 11 | L 3   | 385.2838  | 193.1315 |
| 1276.6208 | 638.8141 | 12 | P 2   | 272.1717  | 136.5895 |
|           |          | 13 | R 1   | 175.1190  | 88.0631  |

[Click] to move table  
 Static Modifications:  
 C: 57.0215

| Protein Probab. | Protein                     | Tot. Peptides | Unique Peptides | Best Gene Name    | Scan # | Charge | Delta Mass | Peptide Prophet Score | Peptide Sequence       |
|-----------------|-----------------------------|---------------|-----------------|-------------------|--------|--------|------------|-----------------------|------------------------|
| 0.9869          | IPI00873484,<br>IPI00005969 | 1             | 1               | CAPZA1,<br>CAPZA1 | 3203   | 2+     | -0.0247    | 0.9999                | K.FITHAPPGEFNEVFNDVR.L |

### Peptide Details

#### SHOW MODIFICATIONS -

|              |           |                |         |          |                                                                                      |
|--------------|-----------|----------------|---------|----------|--------------------------------------------------------------------------------------|
| Scan         | 3203      | Delta Mass     | -0.0247 | Protein  | IPI00005969                                                                          |
| Mass         | 2089.0140 | Next           | 303.000 | Fraction | VF_T13h_band03.mzXML                                                                 |
| Hyper        | 572.000   | PeptideProphet | 1.00    | Run      | VF_T13h_band03.pep.xml (Vikor/VF_T13h_band03 (VF_SILAC_AssimWindow_NewPL_4da_Human)) |
| Protein Hits | 2         | Ion Percent    | 85%     |          |                                                                                      |
| Charge       | 2+        | B              | 1.000   |          |                                                                                      |

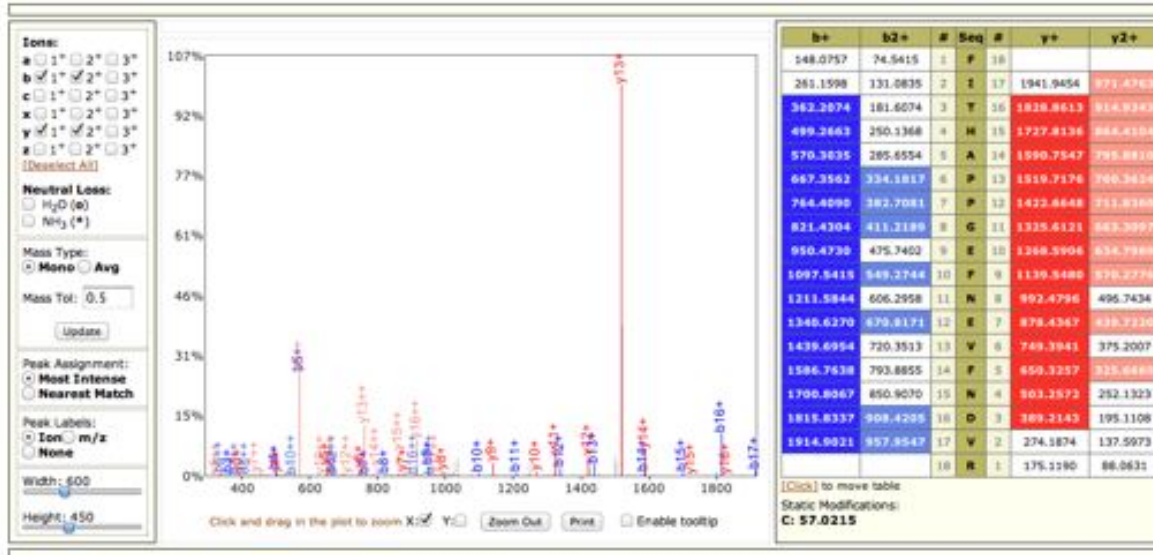

| Protein Probab. | Protein                                     | Tot. Peptides | Unique Peptides | Best Gene Name                  | Scan # | Charge | Delta Mass | Peptide Prophet Score | Peptide Sequence            |
|-----------------|---------------------------------------------|---------------|-----------------|---------------------------------|--------|--------|------------|-----------------------|-----------------------------|
| 0.9822          | IPI00639797,<br>IPI00336094,<br>IPI00017726 | 1             | 1               | HSD17B10,<br>HSD17B10,<br>HADH2 | 3205   | 2+     | +0.9868    | 0.9995                | R.LVGQGASAVLLDLPNSGGEAQAK.K |

### Peptide Details

#### SHOW MODIFICATIONS

|              |           |                |         |          |                                                                                      |
|--------------|-----------|----------------|---------|----------|--------------------------------------------------------------------------------------|
| Scan         | 3205      | Delta Mass     | +0.9868 | Protein  | IPI00017726                                                                          |
| Mass         | 2195.1670 | Next           | 258.000 | Fraction | VF_T13h_band03.mzXML                                                                 |
| Hyper        | 557.000   | PeptideProphet | 1.00    | Run      | VF_T13h_band03.pep.xml (Vitor/VF_T13h_band03 [VF_SILAC_AssayWindow_NewPL_4da_Human]) |
| Protein Hits | 3         | Ion Percent    | 77%     |          |                                                                                      |
| Charge       | 2+        | B              | 1.000   |          |                                                                                      |

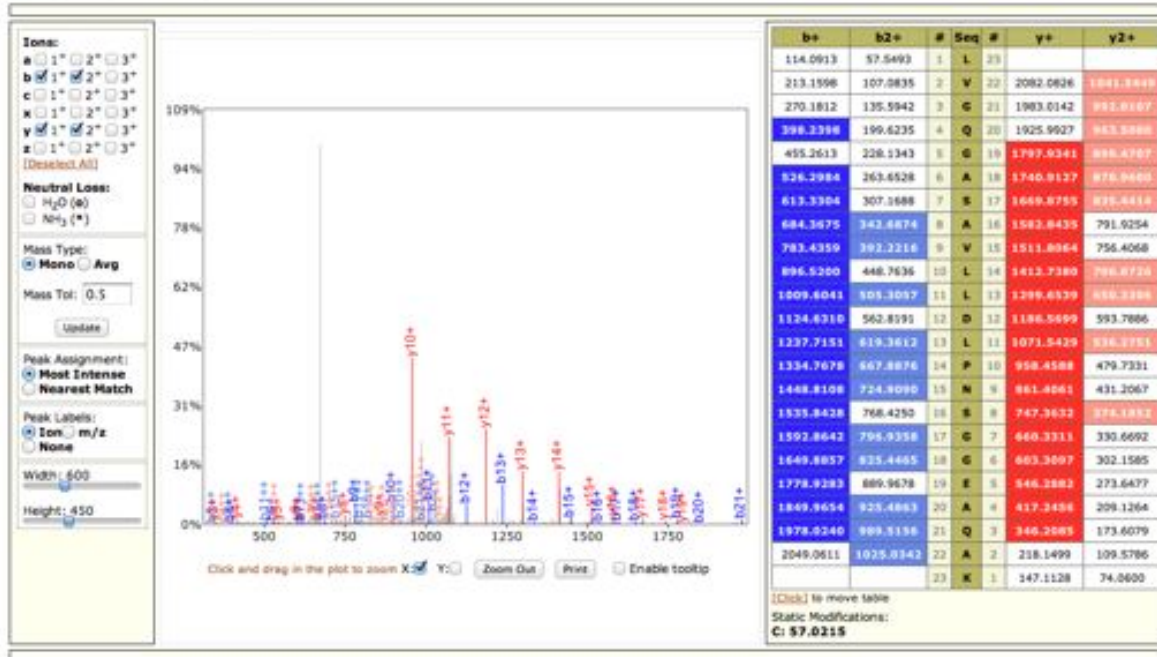

| Protein Probab. | Protein                                     | Tot. Peptides | Unique Peptides | Best Gene Name         | Scan # | Charge | Delta Mass | Peptide Prophet Score | Peptide Sequence |
|-----------------|---------------------------------------------|---------------|-----------------|------------------------|--------|--------|------------|-----------------------|------------------|
| 0.9877          | IPI00646864,<br>IPI00647421,<br>IPI00019385 | 1             | 1               | SSR4,<br>SSR4,<br>SSR4 | 3220   | 2+     | -0.0127    | 1.0000                | R.FFDEESYSLLR.K  |

### Peptide Details

#### SHOW MODIFICATIONS

|              |           |                |         |          |                                                                                       |
|--------------|-----------|----------------|---------|----------|---------------------------------------------------------------------------------------|
| Scan         | 3220      | Delta Mass     | -0.0127 | Protein  | IPI00019385                                                                           |
| Mass         | 1405.6630 | Next           | 256.000 | Fraction | VF_T13h_band05.mzXML                                                                  |
| Hyper        | 546.000   | PeptideProphet | 1.00    | Run      | VF_T13h_band05.pep.xml (Vitor/VF_T13h_band05<br>(VF_SILAC_AssimWindow_New/4da_Human)) |
| Protein Hits | 3         | Ion Percent    | 90%     |          |                                                                                       |
| Charge       | 2+        | B              | 1.000   |          |                                                                                       |

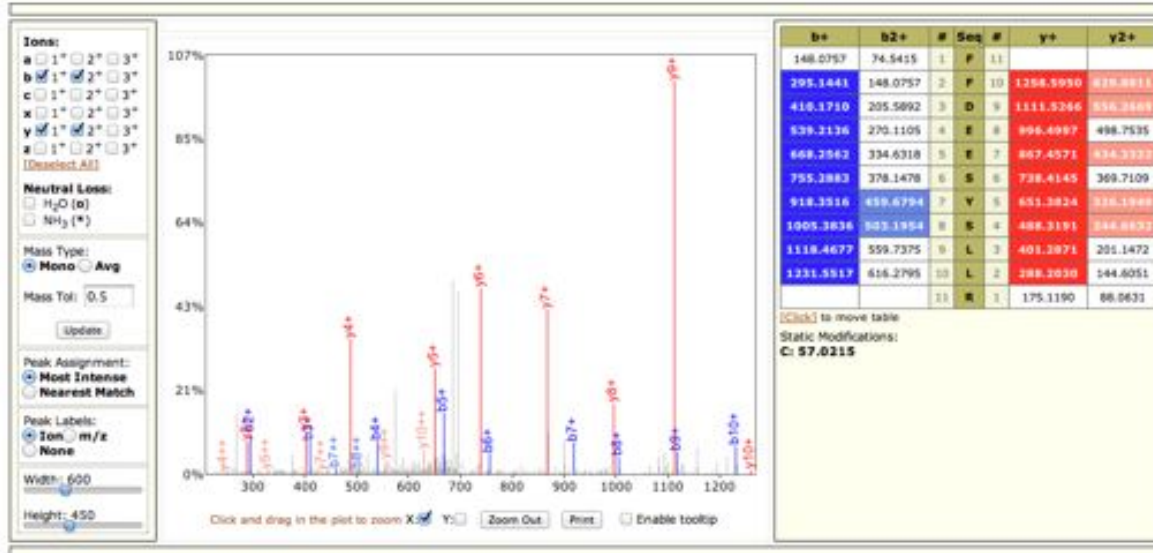

| Protein Probab. | Protein                                     | Tot. Peptides | Unique Peptides | Best Gene Name         | Scan # | Charge | Delta Mass | Peptide Prophet Score | Peptide Sequence |
|-----------------|---------------------------------------------|---------------|-----------------|------------------------|--------|--------|------------|-----------------------|------------------|
| 0.9849          | IPI00646864,<br>IPI00647421,<br>IPI00019385 | 1             | 1               | SSR4,<br>SSR4,<br>SSR4 | 3225   | 2+     | -0.0145    | 0.9996                | R.FFDEESYSLLR.K  |

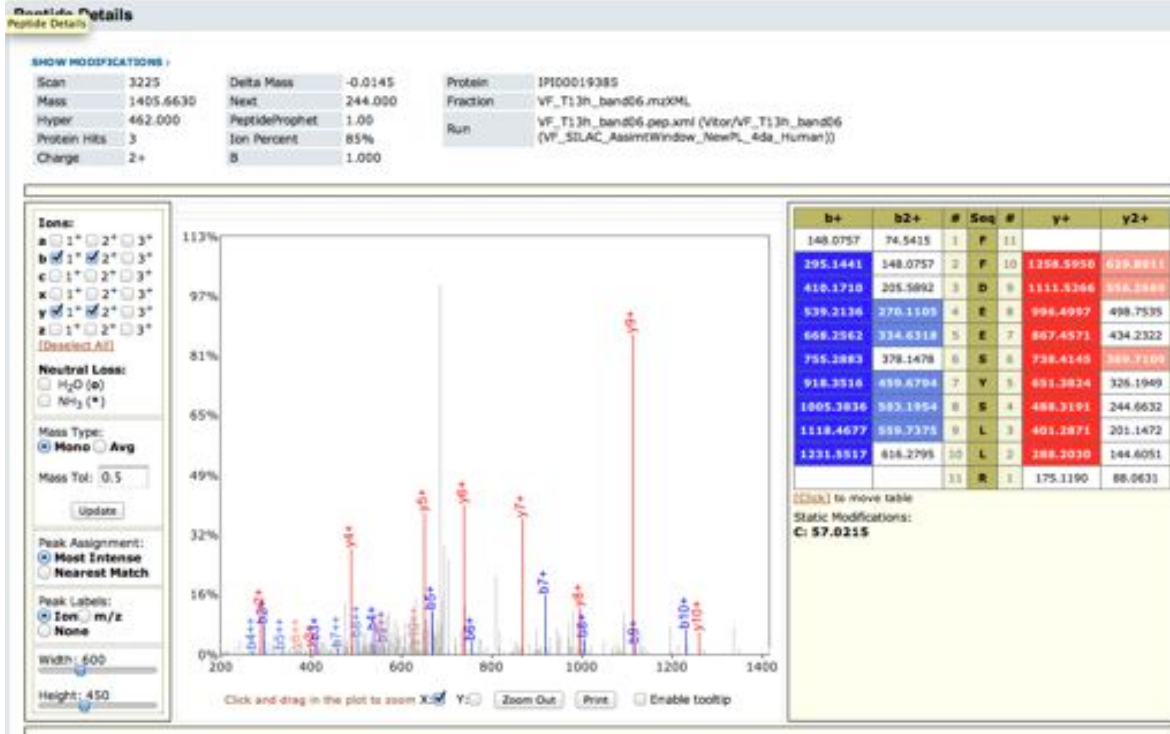

| Protein Probab. | Protein                                                                                                     | Tot. Peptides | Unique Peptides | Best Gene Name                                                           | Scan # | Charge | Delta Mass | Peptide Prophet Score | Peptide Sequence    |
|-----------------|-------------------------------------------------------------------------------------------------------------|---------------|-----------------|--------------------------------------------------------------------------|--------|--------|------------|-----------------------|---------------------|
| 0.9881          | IPI00894530,<br>IPI00293476,<br>IPI00871573,<br>IPI00872806,<br>IPI00658024,<br>IPI00853031,<br>IPI00853201 | 1             | 1               | MRPL23,<br>MRPL23,<br>MRPL23,<br>MRPL23,<br>MRPL23,<br>MRPL23,<br>MRPL23 | 3271   | 2+     | -0.0188    | 0.9999                | R.NYLEGIYNVPVAAVR.T |

### Peptide Details

#### SHOW MODIFICATIONS

|              |           |                |         |          |                                                                                        |
|--------------|-----------|----------------|---------|----------|----------------------------------------------------------------------------------------|
| Scan         | 3271      | Delta Mass     | -0.0188 | Protein  | IPI00293476                                                                            |
| Mass         | 1677.8960 | Next           | 304.000 | Fraction | VF_T13h_band06.mzXML                                                                   |
| Hyper        | 677.000   | PeptideProphet | 1.00    | Run      | VF_T13h_band06 pep.xml (Vfor/VF_T13h_band06<br>(VF_S01AC_AssimWindow_NewPl_46a_Human)) |
| Protein Hits | 7         | Ion Percent    | 89%     |          |                                                                                        |
| Charge       | 2+        | B              | 1.000   |          |                                                                                        |

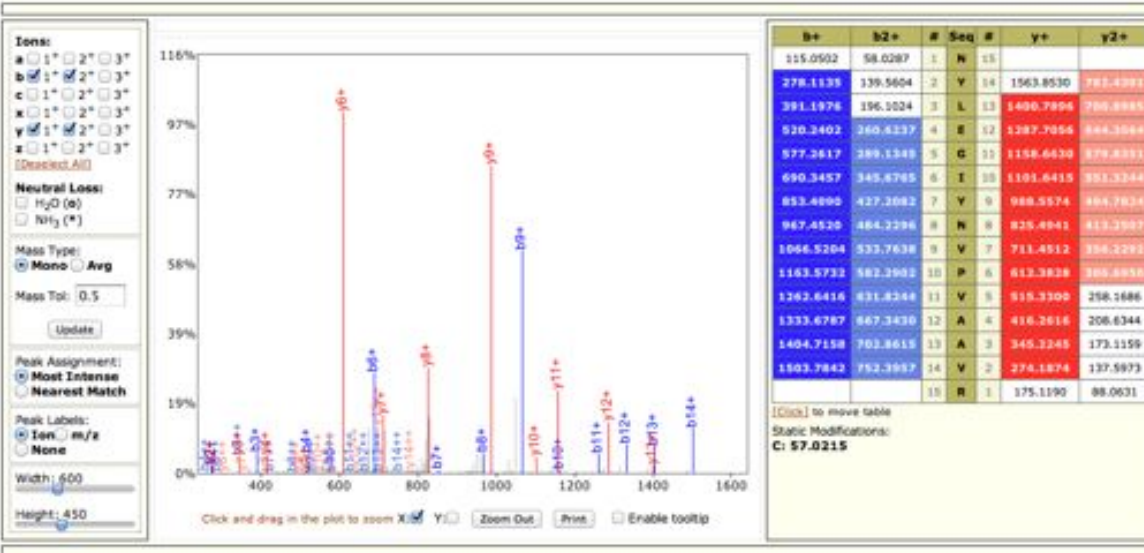

| Protein Probab. | Protein                     | Tot. Peptides | Unique Peptides | Best Gene Name | Scan # | Charge | Delta Mass | Peptide Prophet Score | Peptide Sequence |
|-----------------|-----------------------------|---------------|-----------------|----------------|--------|--------|------------|-----------------------|------------------|
| 0.9793          | IPI00908304,<br>IPI00031697 | 1             | 1               | -,<br>TMEM109  | 3297   | 2+     | -0.0125    | 0.9996                | R.EAPVDVLTQIGR.S |

### Peptide Details

#### Peptide Details

##### SHOW MODIFICATIONS

|              |           |                |         |          |                                                                                          |
|--------------|-----------|----------------|---------|----------|------------------------------------------------------------------------------------------|
| Scan         | 3297      | Delta Mass     | -0.0125 | Protein  | IPI00031697                                                                              |
| Mass         | 1297.7110 | Next           | 351.000 | Fraction | VF_T13h_band04.mzXML                                                                     |
| Hyper        | 527.000   | PeptideProphet | 1.00    | Run      | VF_T13h_band04.pep.xml (Vitor/VF_T13h_band04<br>[VF_SILAC_AasmitWindow_NewPL_4da_Human]) |
| Protein Hits | 2         | Ion Percent    | 82%     |          |                                                                                          |
| Charge       | 2+        | B              | 1.000   |          |                                                                                          |

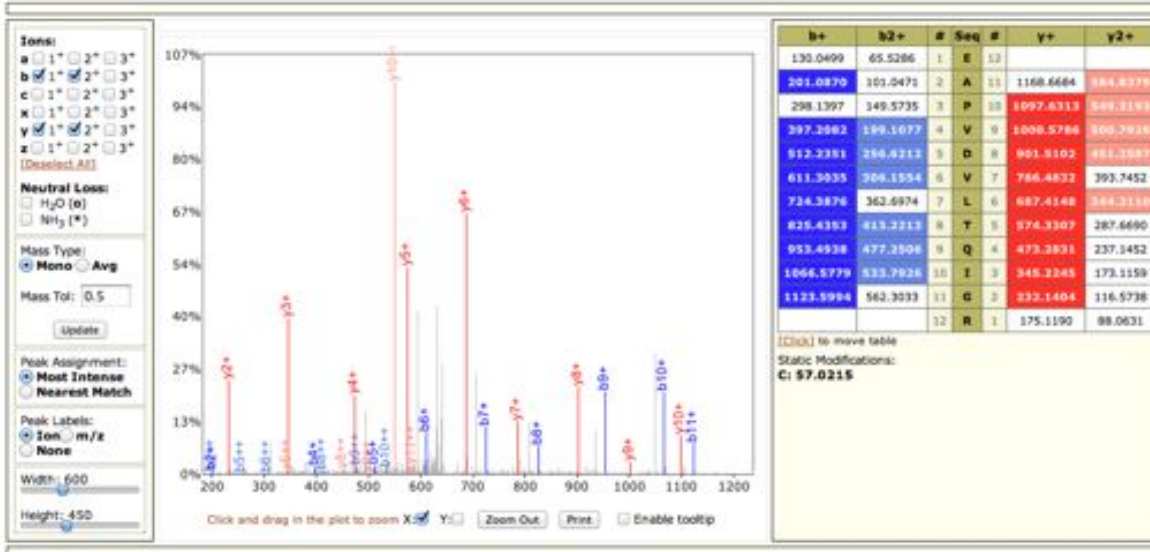



| Protein Probab. | Protein     | Tot. Peptides | Unique Peptides | Best Gene Name | Scan # | Charge | Delta Mass | Peptide Prophet Score | Peptide Sequence         |
|-----------------|-------------|---------------|-----------------|----------------|--------|--------|------------|-----------------------|--------------------------|
| 0.9822          | IPI00017342 | 1             | 1               | ARHG           | 3331   | 2+     | -0.0242    | 0.9998                | K.EYIPTVFDNYSQAQSAVDGR.T |

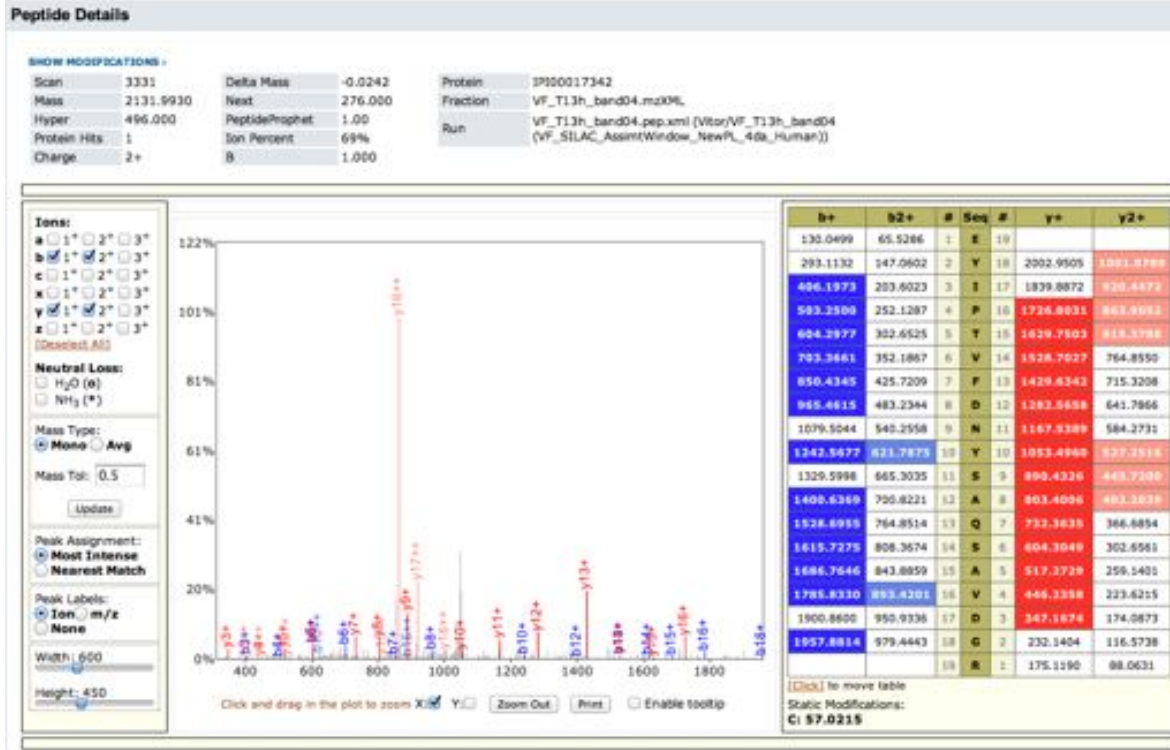

| Protein Probab. | Protein     | Tot. Peptides | Unique Peptides | Best Gene Name | Scan # | Charge | Delta Mass | Peptide Prophet Score | Peptide Sequence        |
|-----------------|-------------|---------------|-----------------|----------------|--------|--------|------------|-----------------------|-------------------------|
| 0.9877          | IPI00032460 | 1             | 1               | LSM2           | 3335   | 2+     | -0.0221    | 1.0000                | R.YVQLPADEVDTQLLQDAAR.K |

### Peptide Details

#### SHOW MODIFICATIONS -

|              |           |                |         |          |                                                                                      |
|--------------|-----------|----------------|---------|----------|--------------------------------------------------------------------------------------|
| Scan         | 3335      | Delta Mass     | -0.0221 | Protein  | IPI00032460                                                                          |
| Mass         | 2145.0820 | Next           | 369.000 | Fraction | VF_T13h_band05.mzXML                                                                 |
| Hyper        | 719.000   | PeptideProphet | 1.00    | Run      | VF_T13h_band05.pep.xml (vitor/vf_T13h_band05 (VF_S3LAC_AssimWindow_NewPL_4da_Human)) |
| Protein Hits | 1         | Ion Percent    | 81%     |          |                                                                                      |
| Charge       | 2+        | B              | 1.000   |          |                                                                                      |

#### Ions:

- a 1\*  2\*  3\*  
 b 1\*  2\*  3\*  
 c 1\*  2\*  3\*  
 x 1\*  2\*  3\*  
 y 1\*  2\*  3\*  
 z 1\*  2\*  3\*  
[\[Delete All\]](#)

#### Neutral Loss:

- H<sub>2</sub>O (0)  
 NH<sub>3</sub> (\*)

#### Mass Type:

- Mono  Avg

Mass Tol: 0.5

[Update](#)

#### Peak Assignment:

- Most Intense  
 Nearest Match

#### Peak Labels:

- Ion  m/z  
 None

Width: 500

Height: 450

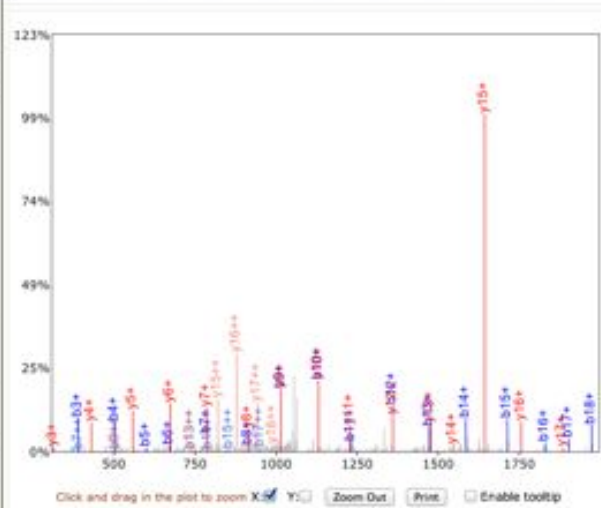

| b+        | b2+      | #  | Seq # | y+ | y2+       |
|-----------|----------|----|-------|----|-----------|
| 164.0706  | 82.5388  | 1  | Y     | 19 |           |
| 263.1390  | 132.0731 | 2  | V     | 16 | 1982.0189 |
| 391.1976  | 196.1024 | 3  | Q     | 17 | 1882.9505 |
| 504.2817  | 252.6445 | 4  | L     | 16 | 1754.8919 |
| 601.3344  | 301.1708 | 5  | F     | 15 | 1641.8079 |
| 672.3715  | 336.6894 | 6  | A     | 14 | 1544.7551 |
| 787.3985  | 394.2029 | 7  | D     | 13 | 1473.7180 |
| 916.4411  | 458.7242 | 8  | E     | 12 | 1358.6910 |
| 1015.5099 | 508.2584 | 9  | V     | 11 | 1229.6484 |
| 1130.5364 | 565.7719 | 10 | D     | 10 | 1130.5800 |
| 1231.5841 | 616.2957 | 11 | T     | 9  | 1015.5521 |
| 1309.6427 | 680.3250 | 12 | Q     | 8  | 914.5054  |
| 1472.7268 | 736.8670 | 13 | L     | 7  | 786.4468  |
| 1585.8108 | 793.4099 | 14 | L     | 6  | 672.3628  |
| 1713.8694 | 857.4385 | 15 | Q     | 5  | 569.3787  |
| 1828.8963 | 914.9518 | 16 | D     | 4  | 432.2201  |
| 1899.8334 | 950.4704 | 17 | A     | 3  | 317.1932  |
| 1970.9706 | 985.9889 | 18 | A     | 2  | 246.1561  |
|           |          | 19 | R     | 1  | 175.1190  |

[\[Click\]](#) to move table  
 Static Modifications:  
**C: 57.0215**

| Protein Probab. | Protein                                     | Tot. Peptides | Unique Peptides | Best Gene Name               | Scan # | Charge | Delta Mass | Peptide Prophet Score | Peptide Sequence |
|-----------------|---------------------------------------------|---------------|-----------------|------------------------------|--------|--------|------------|-----------------------|------------------|
| 0.9552          | IPI00446235,<br>IPI00871319,<br>IPI00328415 | 1             | 1               | CYB5R3,<br>CYB5R3,<br>CYB5R3 | 3350   | 2+     | -0.0141    | 0.9979                | K.DILLRPELEELR.N |

### Peptide Details

| Peptide Details |           | Protein         |                                                                                    |
|-----------------|-----------|-----------------|------------------------------------------------------------------------------------|
| Scan            | 3350      | Delta Mass      | -0.0141                                                                            |
| Mass            | 1495.8480 | Next            | 377.000                                                                            |
| Hyper           | 492.000   | Peptide/Prophet | 1.00                                                                               |
| Protein Hits    | 3         | Ion Percent     | 77%                                                                                |
| Charge          | 2+        | B               | 1.000                                                                              |
|                 |           | Fraction        | IPI00328415                                                                        |
|                 |           | Run             | VF_T13h_band04.mzXML (Vitor/VF_T13h_band04 (VF_SILAC_AssimWindow_NewPL_4da_Human)) |

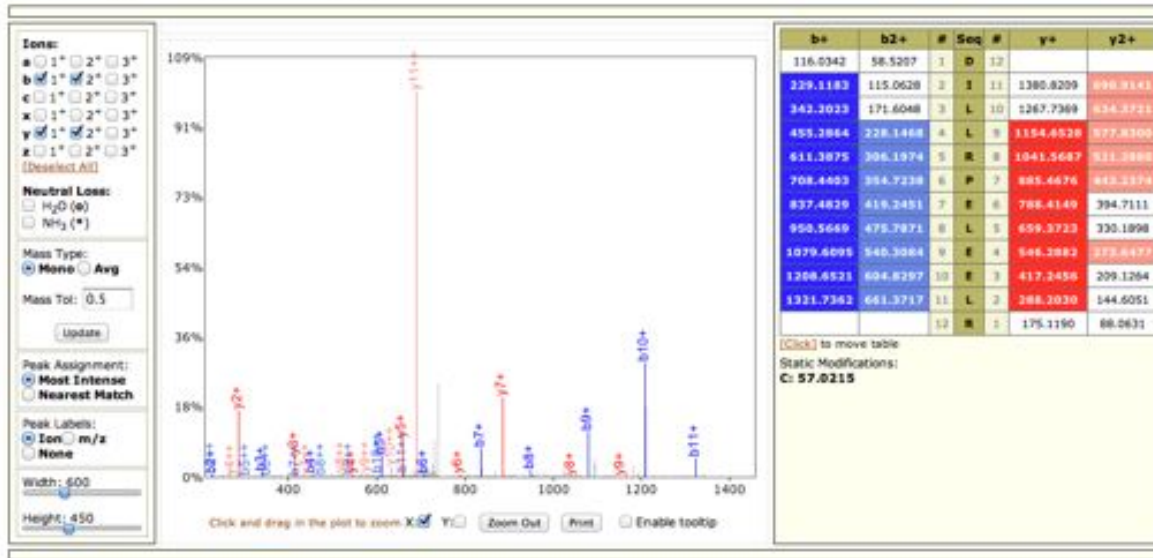

| Protein Probab. | Protein                                     | Tot. Peptides | Unique Peptides | Best Gene Name         | Scan # | Charge | Delta Mass | Peptide Prophet Score | Peptide Sequence |
|-----------------|---------------------------------------------|---------------|-----------------|------------------------|--------|--------|------------|-----------------------|------------------|
| 0.9184          | IPI00896464,<br>IPI00401791,<br>IPI00797136 | 1             | 1               | IKIP,<br>IKIP,<br>IKIP | 3350   | 2+     | -0.0153    | 0.9937                | R.LEPLVNDLTLR.I  |

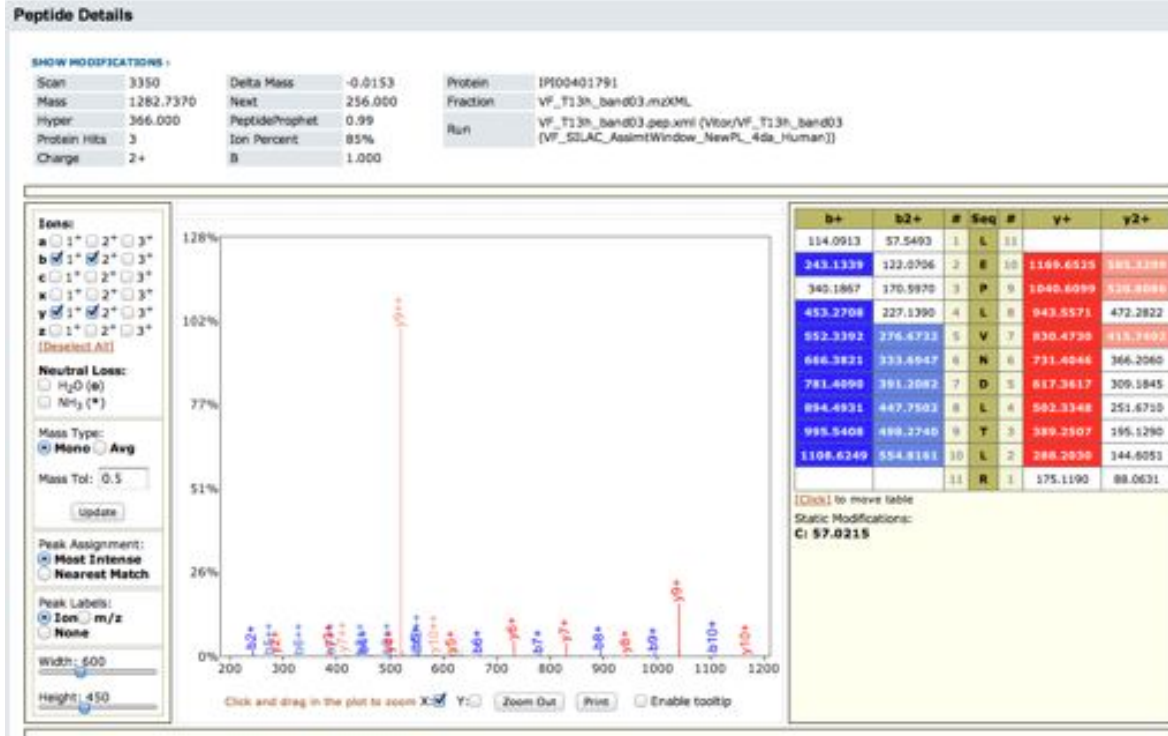

| Protein Probab. | Protein     | Tot. Peptides | Unique Peptides | Best Gene Name | Scan # | Charge | Delta Mass | Peptide Prophet Score | Peptide Sequence   |
|-----------------|-------------|---------------|-----------------|----------------|--------|--------|------------|-----------------------|--------------------|
| 0.9865          | IPI00005202 | 1             | 1               | PGRMC2         | 3364   | 2+     | -0.0175    | 0.9999                | K.FYGPAGPYGIFAGR.D |

### Peptide Details

#### SHOW MODIFICATIONS -

|              |           |                 |         |          |                                                                                      |
|--------------|-----------|-----------------|---------|----------|--------------------------------------------------------------------------------------|
| Scan         | 3364      | Delta Mass      | -0.0175 | Protein  | IPI00005202                                                                          |
| Mass         | 1472.7320 | Next            | 301.000 | Fraction | VF_T13h_band05.mzXML                                                                 |
| Hyper        | 559.000   | Peptide/Prophet | 1.00    | Run      | VF_T13h_band05 pep.xml (Vitor/VF_T13h_band05 [VF_SILAC_AssmtWindow_NewPL_4da_Human]) |
| Protein Hits | 1         | Ion Percent     | 85%     |          |                                                                                      |
| Charge       | 2+        | B               | 1.000   |          |                                                                                      |

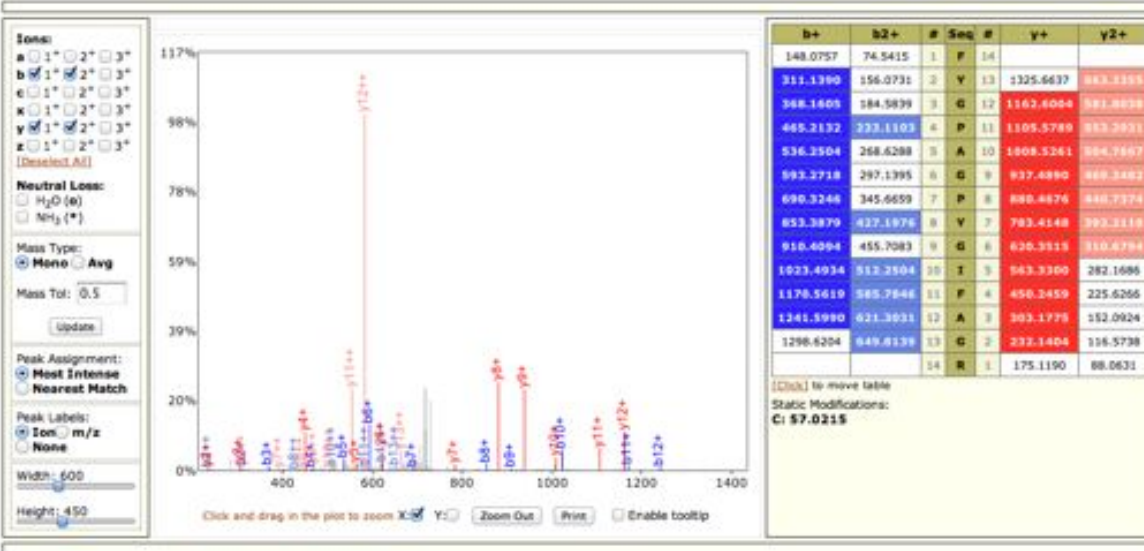

| b+        | b2+      | #  | Seq # | y+        | y2+      |
|-----------|----------|----|-------|-----------|----------|
| 148.0757  | 74.5415  | 1  | F 14  |           |          |
| 311.1390  | 156.0731 | 2  | Y 13  | 1325.6637 | 883.1195 |
| 368.1405  | 184.5839 | 3  | G 12  | 1167.6064 | 591.3038 |
| 465.2132  | 233.1103 | 4  | P 11  | 1105.5789 | 853.7831 |
| 536.3504  | 268.6288 | 5  | A 10  | 1008.5261 | 554.7607 |
| 593.2718  | 297.1395 | 6  | G 9   | 937.4890  | 460.3482 |
| 690.3246  | 345.6659 | 7  | P 8   | 880.4076  | 440.7374 |
| 853.3879  | 427.1976 | 8  | Y 7   | 793.4148  | 393.3118 |
| 910.4094  | 455.7083 | 9  | G 6   | 620.3315  | 310.6794 |
| 1023.4934 | 513.2504 | 10 | T 5   | 563.3360  | 282.1686 |
| 1170.5610 | 585.7846 | 11 | F 4   | 450.2459  | 225.6266 |
| 1241.5990 | 621.3031 | 12 | A 3   | 303.1776  | 152.0924 |
| 1298.6204 | 649.8138 | 13 | G 2   | 232.1404  | 116.5738 |
|           |          | 14 | R 1   | 175.1190  | 88.0631  |

Click to move table  
 Static Modifications:  
 C: 57.0215

| Protein Probab. | Protein                                                                                                                                                                                                                                  | Tot. Peptides | Unique Peptides | Best Gene Name                                                                                 | Scan# | Charge | Delta Mass | Peptide Prophet Score | Peptide Sequence |
|-----------------|------------------------------------------------------------------------------------------------------------------------------------------------------------------------------------------------------------------------------------------|---------------|-----------------|------------------------------------------------------------------------------------------------|-------|--------|------------|-----------------------|------------------|
| 0.9870          | IPI00815947, IPI00853641, IPI00884436, IPI00791558, IPI00796636, IPI00829896, IPI00915024, IPI00657911, IPI00657660, IPI00217471, IPI00220706, IPI00473011, IPI00554676, IPI00654755, IPI00816618, IPI00744503, IPI00749035, IPI00884107 | 1             | 1               | HBB, HBE1, -, HBB, HBB, HBD, HBD, HBG2, HBB, HBE1, HBG1, HBD, HBG1, HBB, HBG2, HBG1, HBG2, HBB | 3374  | 2+     | -0.0157    | 0.9998                | R.LLVVYPWTQR.F   |

### Peptide Details

#### SHOW MODIFICATIONS

|              |           |                |         |          |                                                                                      |
|--------------|-----------|----------------|---------|----------|--------------------------------------------------------------------------------------|
| Scan         | 3374      | Delta Mass     | -0.0157 | Protein  | [P000217471]                                                                         |
| Mass         | 1274.7260 | Next           | 382.000 | Fraction | VF_T13h_band06.mzXML                                                                 |
| Hyper        | 653.000   | PeptideProphet | 1.00    | Run      | VF_T13h_band06.pep.xml (Vitor/VF_T13h_band06 [VF_SILAC_AssmtWindow_NewPL_4da_Human]) |
| Protein Hits | 18        | Ion Percent    | 89%     |          |                                                                                      |
| Charge       | 2+        | B              | 1.000   |          |                                                                                      |

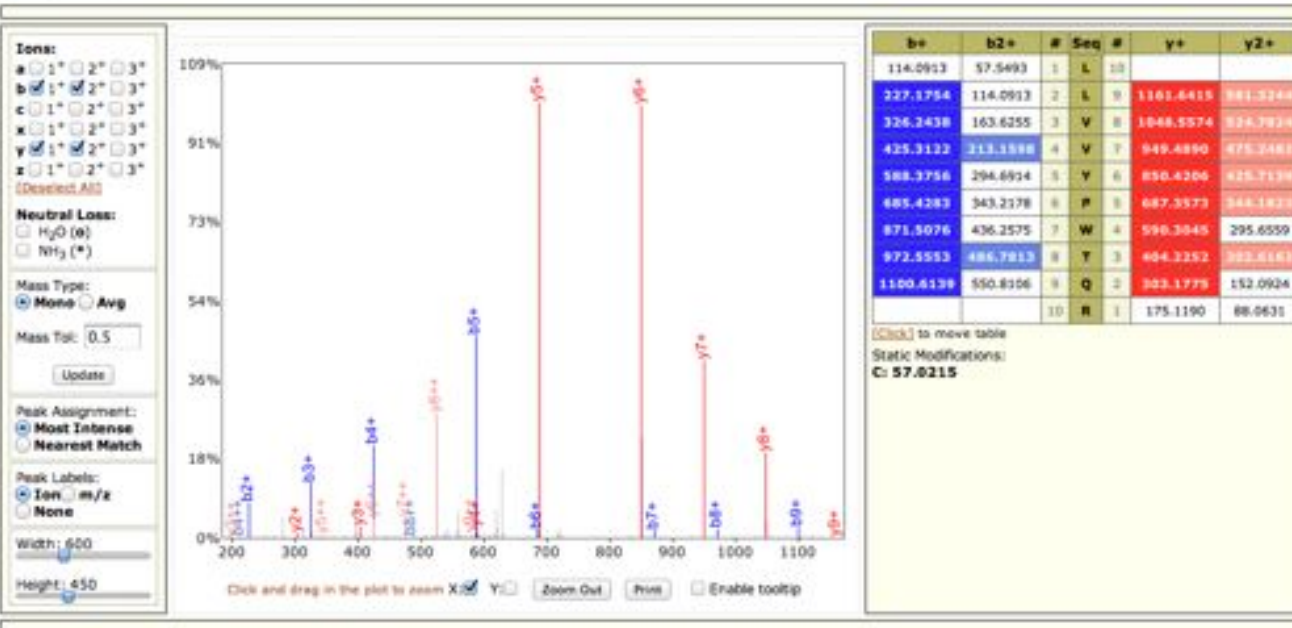

| Protein Probab. | Protein     | Tot. Peptides | Unique Peptides | Best Gene Name | Scan # | Charge | Delta Mass | Peptide Prophet Score | Peptide Sequence          |
|-----------------|-------------|---------------|-----------------|----------------|--------|--------|------------|-----------------------|---------------------------|
| 0,9793          | IP100024993 | 1             | 1               | ECHS1          | 3379   | 2+     | -0,0157    | 0,9998                | K.AQFAQPEILIGTIPGAGGTQR.L |

**Peptide Details** FIND MS/MS FEATURES BLAST

SHOW MODIFICATIONS -

|                 |                      |                                                   |
|-----------------|----------------------|---------------------------------------------------|
| Scan: 3379      | Delta Mass: -0.0157  | Protein: IP100024993                              |
| Mass: 2125.1400 | Next: 281.000        | Fraction: VF_T13h_band01.mz0%                     |
| Hyper: 511.000  | PeptideProphet: 1.00 | Run: VF_T13h_band01.pep.xml (Vitor/VF_T13h_band01 |
| Protein Hits: 1 | Ion Percent: 82%     | [VF_SI.AC_AssimWindow_NewPL_4da_human])           |
| Charge: 2+      | B: 1.000             |                                                   |

  

**Ions:**

a  1\*  2\*  3\*

b  1\*  2\*  3\*

c  1\*  2\*  3\*

x  1\*  2\*  3\*

y  1\*  2\*  3\*

z  1\*  2\*  3\*

[DelectAll]

**Neutral Loss:**

H<sub>2</sub>O (0)

NH<sub>3</sub> (\*)

**Mass Type:**

Mono  Avg

Mass Tol: 0.5

**Peak Assignment:**

Most Intense  Nearest Match

**Peak Labels:**

Ion  m/z  None

Width: 500

Height: 450

Click and drag in the plot to zoom. X:  Y:     Enable tooltip

| b+        | b2+      | #  | Seq | #  | y+        | y2+       |
|-----------|----------|----|-----|----|-----------|-----------|
| 72.0444   | 36.5258  | 1  | A   | 21 |           |           |
| 200.1030  | 100.5351 | 2  | Q   | 20 | 2054.1029 | 1007.5515 |
| 347.1714  | 174.0893 | 3  | F   | 19 | 1926.0443 | 963.0200  |
| 418.3089  | 209.6079 | 4  | A   | 18 | 1778.3799 | 889.9916  |
| 548.3671  | 273.6372 | 5  | Q   | 17 | 1797.9388 | 894.4739  |
| 643.3198  | 322.1636 | 6  | P   | 16 | 1579.8802 | 789.4400  |
| 772.3624  | 386.6849 | 7  | E   | 15 | 1482.8275 | 741.8179  |
| 885.4465  | 443.2269 | 8  | I   | 14 | 1353.7849 | 677.0061  |
| 998.5306  | 499.7689 | 9  | L   | 13 | 1246.7008 | 623.8549  |
| 1111.6146 | 556.3109 | 10 | I   | 12 | 1127.6167 | 564.3100  |
| 1168.6361 | 584.8317 | 11 | C   | 11 | 1014.8327 | 507.7706  |
| 1269.6838 | 633.3455 | 12 | T   | 10 | 957.6111  | 479.2592  |
| 1382.7679 | 691.8876 | 13 | I   | 9  | 856.6620  | 428.7354  |
| 1479.8266 | 740.4138 | 14 | P   | 8  | 743.3785  | 372.1934  |
| 1536.8421 | 768.9347 | 15 | C   | 7  | 646.3267  | 323.6670  |
| 1607.8792 | 804.4432 | 16 | A   | 6  | 589.3082  | 295.1563  |
| 1664.9066 | 832.9540 | 17 | C   | 5  | 518.2481  | 259.6377  |
| 1721.9221 | 861.4647 | 18 | C   | 4  | 461.2467  | 231.1270  |
| 1822.9698 | 911.9885 | 18 | T   | 3  | 464.2282  | 202.6062  |
| 1951.0284 | 976.0178 | 20 | Q   | 2  | 303.1775  | 152.0924  |
|           |          | 21 | R   | 1  | 175.1190  | 88.0631   |

[Click] to move table

Static Modifications:

C: 57.0215

| Protein Probab. | Protein     | Tot. Peptides | Unique Peptides | Best Gene Name | Scan # | Charge | Delta Mass | Peptide Prophet Score | Peptide Sequence   |
|-----------------|-------------|---------------|-----------------|----------------|--------|--------|------------|-----------------------|--------------------|
| 0,9323          | IP100386294 | 1             | 1               | OBTP           | 3392   | 2+     | -0,0155    | 0,9952                | R.NLSDIDLMAPQPGV.- |

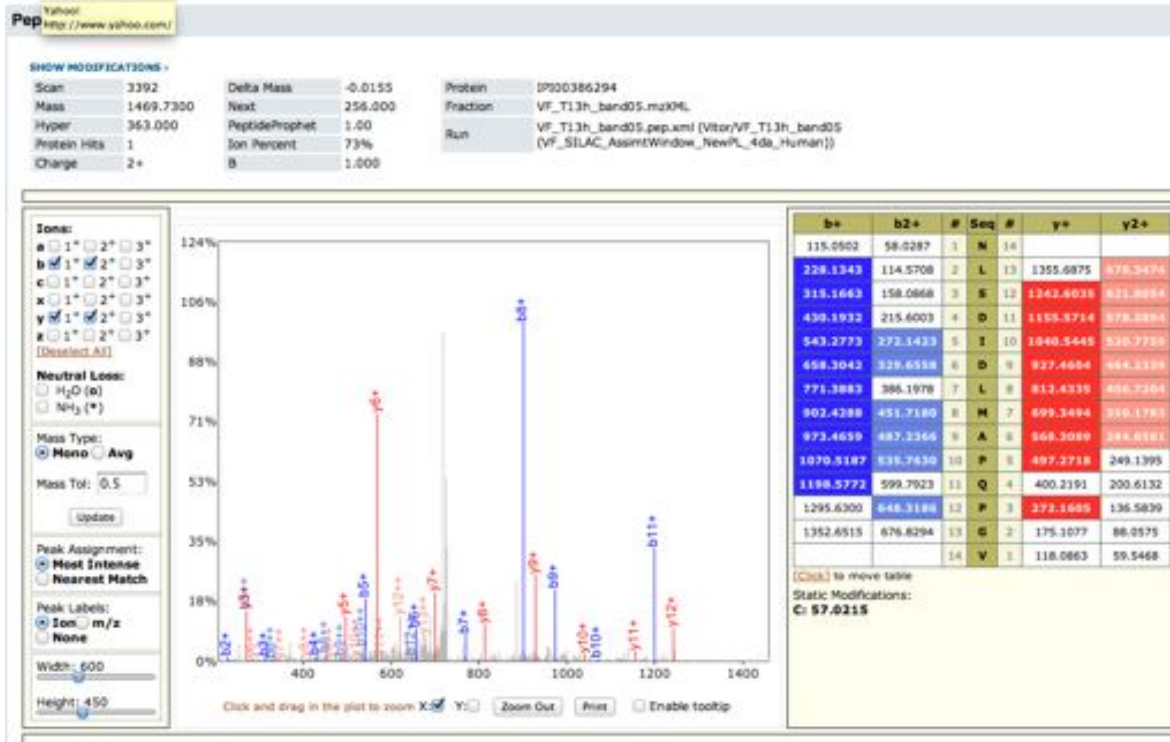



| Protein Probab. | Protein     | Tot. Peptides | Unique Peptides | Best Gene Name | Scan # | Charge | Delta Mass | Peptide Prophet Score | Peptide Sequence  |
|-----------------|-------------|---------------|-----------------|----------------|--------|--------|------------|-----------------------|-------------------|
| 0,9869          | IP100023086 | 1             | 1               | MRPL15         | 3413   | 2+     | -0,0158    | 0,9999                | R.LGFEGGQTPFYIR.I |

### Peptide Details

#### SHOW MODIFICATIONS

|              |           |                 |         |          |                                               |
|--------------|-----------|-----------------|---------|----------|-----------------------------------------------|
| Scan         | 3413      | Delta Mass      | -0.0158 | Protein  | IP100023086                                   |
| Mass         | 1484.7530 | Next            | 261.000 | Fraction | VF_T13h_band03.mzXML                          |
| Hyperf       | 524.000   | Peptide/Prophet | 1.00    | Run      | VF_T13h_band03.pep.xml (Vitor/VF_T13h_band03) |
| Protein Hits | 1         | Ion Percent     | 88%     |          | [VF_SILAC_AssmtWindow_NewPL_4da_Human]        |
| Charge       | 2+        | B               | 1.000   |          |                                               |

**Ions:**

1+  2+  3+  
 1+  2+  3+  
 1+  2+  3+  
 1+  2+  3+  
 1+  2+  3+  
 1+  2+  3+  
 1+  2+  3+  
 1+  2+  3+

[Deselect All]

**Neutral Loss:**

H<sub>2</sub>O (o)  
 NH<sub>3</sub> (\*)

**Mass Type:**

Mono  Avg

Mass Tol: 0.5

[Update]

**Peak Assignment:**

Most Intense  
 Nearest Match

**Peak Labels:**

Seq. m/z  
 None

Width: 500

Height: 450

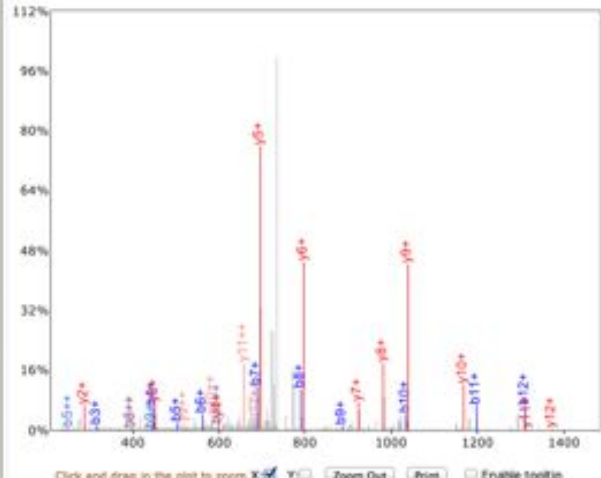

| b+        | b2+      | #  | Seq # | y+        | y2+      |
|-----------|----------|----|-------|-----------|----------|
| 114.0913  | 57.5493  | 1  | L 13  |           |          |
| 171.1128  | 86.0600  | 2  | G 12  | 1371.6492 | 606.3161 |
| 318.1813  | 159.5942 | 3  | F 11  | 1314.6477 | 607.8179 |
| 447.2238  | 224.1155 | 4  | R 10  | 1167.5793 | 584.2932 |
| 504.2453  | 352.6263 | 5  | G 9   | 1038.5367 | 518.7730 |
| 561.2667  | 281.1370 | 6  | G 8   | 961.5152  | 491.2613 |
| 689.3253  | 345.1663 | 7  | Q 7   | 924.4938  | 462.7505 |
| 790.3730  | 395.6961 | 8  | T 6   | 794.4352  | 398.7211 |
| 867.4258  | 444.2165 | 9  | P 5   | 695.3875  | 348.1074 |
| 1034.4942 | 517.7507 | 10 | F 4   | 598.2348  | 299.6710 |
| 1197.5575 | 599.2824 | 11 | Y 3   | 451.2663  | 226.1368 |
| 1310.6416 | 655.8244 | 12 | I 2   | 288.2030  | 144.6051 |
|           |          | 13 | R 1   | 176.1190  | 88.0631  |

[Click] to move table

Static Modifications:

**C: 57.0215**

| Protein Probab. | Protein                                                                     | Tot. Peptides | Unique Peptides | Best Gene Name                                | Scan # | Charge | Delta Mass | Peptide Prophet Score | Peptide Sequence         |
|-----------------|-----------------------------------------------------------------------------|---------------|-----------------|-----------------------------------------------|--------|--------|------------|-----------------------|--------------------------|
| 0,9780          | IPI00795751,<br>IPI00794091,<br>IPI00791920,<br>IPI00010153,<br>IPI00795408 | 1             | 1               | RPL23,<br>RPL23,<br>RPL23,<br>RPL23,<br>RPL23 | 3422   | 2+     | +0,9788    | 0,9992                | R.ISLGLPVGAVINCADNTGAK.N |

### Peptide Details

#### SHOW MODIFICATIONS -

|              |           |                |         |          |                                                                                      |
|--------------|-----------|----------------|---------|----------|--------------------------------------------------------------------------------------|
| Scan         | 3422      | Delta Mass     | +0.9788 | Protein  | IPI00010153                                                                          |
| Mass         | 1970.0380 | Next           | 301.000 | Fraction | VF_T13h_band05.mzXML                                                                 |
| Hyper        | 584.000   | PeptideProphet | 1.00    | Run      | VF_T13h_band05.pep.xml (Vitor/VF_T13h_band05 [VF_SILAC_AssmtWindow_NewPL_4da_Human]) |
| Protein Hits | 5         | Ion Percent    | 87%     |          |                                                                                      |
| Charge       | 2+        | B              | 1.000   |          |                                                                                      |

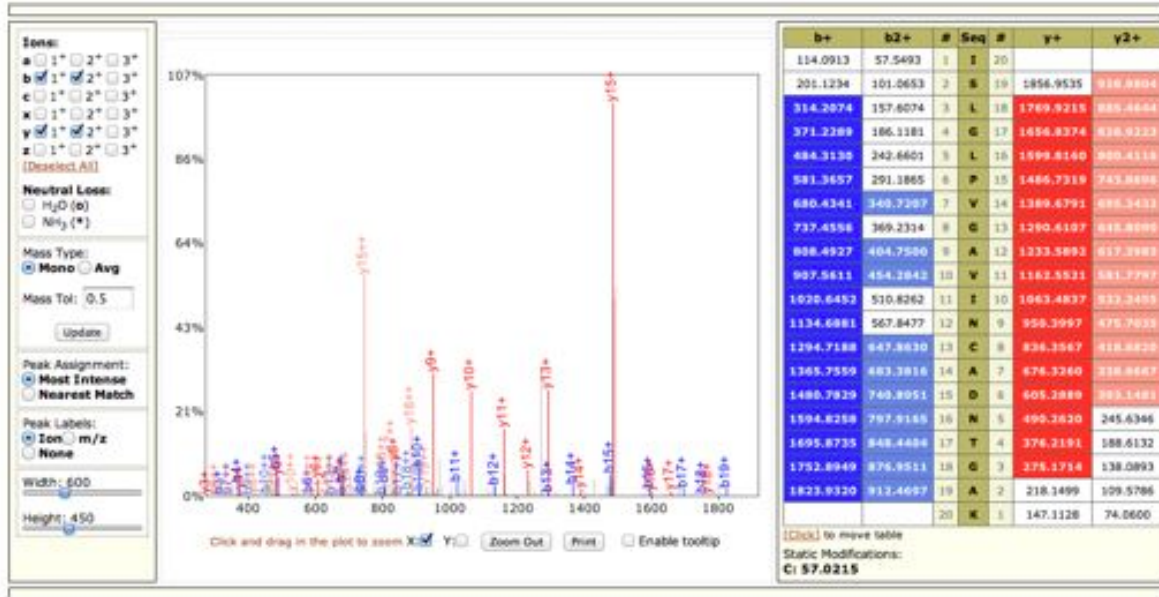

| Protein Probab. | Protein                                                                     | Tot. Peptides | Unique Peptides | Best Gene Name                                | Scan # | Charge | Delta Mass | Peptide Prophet Score | Peptide Sequence         |
|-----------------|-----------------------------------------------------------------------------|---------------|-----------------|-----------------------------------------------|--------|--------|------------|-----------------------|--------------------------|
| 0,9723          | IPI00795751,<br>IPI00794091,<br>IPI00791920,<br>IPI00010153,<br>IPI00795408 | 1             | 1               | RPL23,<br>RPL23,<br>RPL23,<br>RPL23,<br>RPL23 | 3422   | 2+     | +0,9788    | 0,9984                | R.ISLGLPVGAVINCADNTGAK.N |

### Peptide Details

#### SHOW MODIFICATIONS

|              |           |                |         |          |                                                                                         |
|--------------|-----------|----------------|---------|----------|-----------------------------------------------------------------------------------------|
| Scan         | 3422      | Delta Mass     | +0.9788 | Protein  | IPI00010153                                                                             |
| Mass         | 1970.0380 | Next           | 269.000 | Fraction | VF_T13h_band06.mzXML                                                                    |
| Hyper        | 577.000   | PeptideProphet | 1.00    | Run      | VF_T13h_band06.pep.xml (Vitor/VF_T13h_band06<br>(VF_SILAC_AssmtWindow_NewPI_4da_Human)) |
| Protein Hits | 5         | Ion Percent    | 87%     |          |                                                                                         |
| Charge       | 2+        | B              | 1.000   |          |                                                                                         |

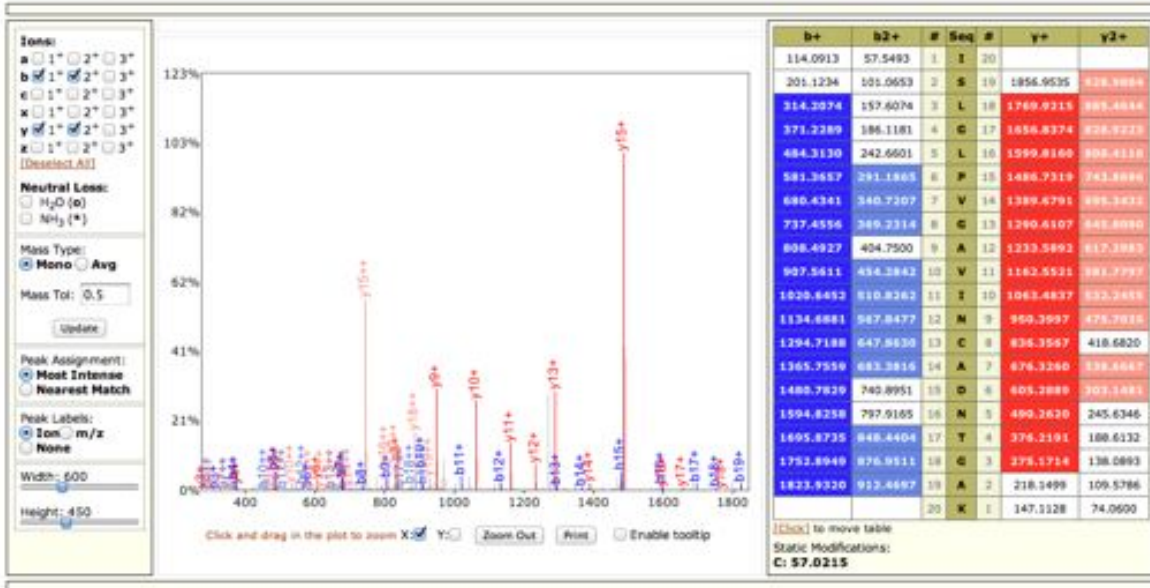

| Protein Probab. | Protein                     | Tot. Peptides | Unique Peptides | Best Gene Name    | Scan # | Charge | Delta Mass | Peptide Prophet Score | Peptide Sequence   |
|-----------------|-----------------------------|---------------|-----------------|-------------------|--------|--------|------------|-----------------------|--------------------|
| 0,9877          | IPI00607610,<br>IPI00103057 | 1             | 1               | FAM36A,<br>FAM36A | 3441   | 2+     | -0,0159    | 1,0000                | K.LLGFLDVENTPCAR.H |

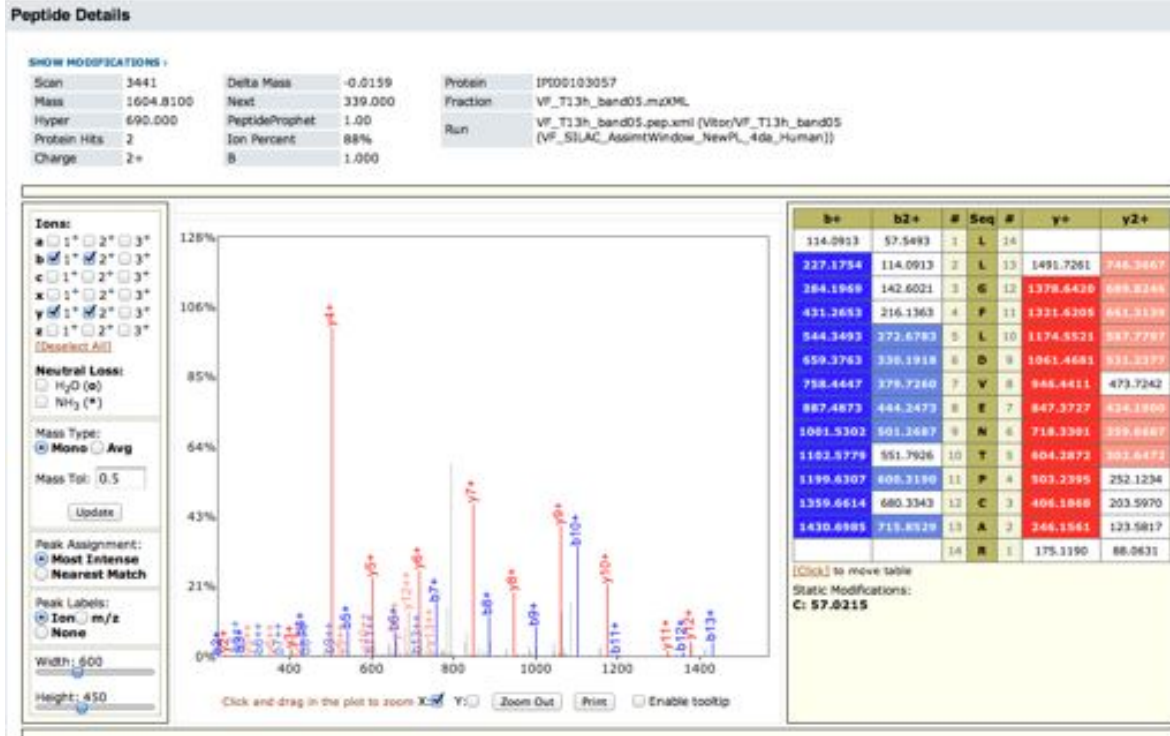

| Protein Probab. | Protein                     | Tot. Peptides | Unique Peptides | Best Gene Name    | Scan # | Charge | Delta Mass | Peptide Prophet Score | Peptide Sequence   |
|-----------------|-----------------------------|---------------|-----------------|-------------------|--------|--------|------------|-----------------------|--------------------|
| 0,9881          | IPI00607610,<br>IPI00103057 | 1             | 1               | FAM36A,<br>FAM36A | 3446   | 2+     | -0,0152    | 0,9999                | K.LLGFLDVENTPCAR.H |

### Peptide Details

#### SHOW MODIFICATIONS

|              |           |                |         |          |                                                                                       |
|--------------|-----------|----------------|---------|----------|---------------------------------------------------------------------------------------|
| Scan         | 3446      | Delta Mass     | -0.0152 | Protein  | IPI00103057                                                                           |
| Mass         | 1604.8100 | Next           | 354.000 | Fraction | VF_T13h_band06.mzXML                                                                  |
| Hyper        | 670.000   | PeptideProphet | 1.00    | Run      | VF_T13h_band06 pep.xml (Vitor/VF_T13h_band06 [VF_53LAC_Assim1Window_NewPL_4da_Human]) |
| Protein Hits | 2         | Ion Percent    | 92%     |          |                                                                                       |
| Charge       | 2+        | B              | 1.000   |          |                                                                                       |

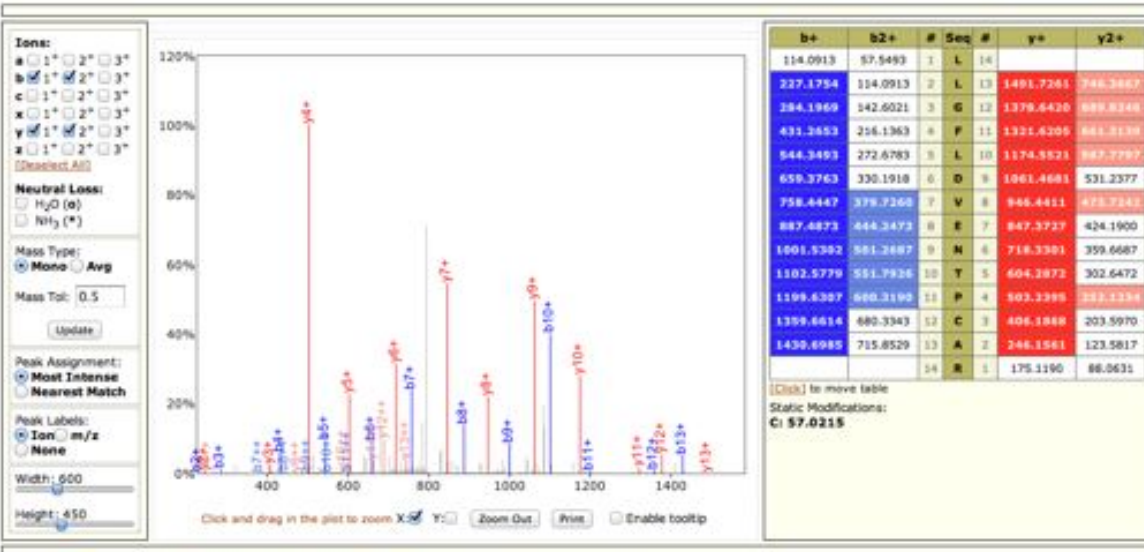

| Protein Probab. | Protein                                     | Tot. Peptides | Unique Peptides | Best Gene Name            | Scan # | Charge | Delta Mass | Peptide Prophet Score | Peptide Sequence |
|-----------------|---------------------------------------------|---------------|-----------------|---------------------------|--------|--------|------------|-----------------------|------------------|
| 0,9552          | IPI00009030,<br>IPI00739827,<br>IPI00216172 | 1             | 1               | LAMP2,<br>LAMP2,<br>LAMP2 | 3453   | 2+     | -0,0111    | 0,9979                | R.IPLNDLFR.C     |

### Peptide Details

#### SHOW MODIFICATIONS

|              |          |                |         |          |                                                                                         |
|--------------|----------|----------------|---------|----------|-----------------------------------------------------------------------------------------|
| Scan         | 3453     | Delta Mass     | -0.0111 | Protein  | IPI00009030                                                                             |
| Mass         | 987.5620 | Next           | 470.000 | Fraction | VF_T13h_band04.mzXML                                                                    |
| Hyper        | 566.000  | PeptideProphet | 1.00    | Run      | VF_T13h_band04 pep.xml (Vitor/VF_T13h_band04<br>[VF_SILAC_AssmtWindow_NewPL_4ds_Human]) |
| Protein Hits | 3        | Ion Percent    | 93%     |          |                                                                                         |
| Charge       | 2+       | B              | 1.000   |          |                                                                                         |

#### Ions:

- 1<sup>+</sup>  2<sup>+</sup>  3<sup>+</sup>  
 1<sup>+</sup>  2<sup>+</sup>  3<sup>+</sup>

[Detect All]

#### Neutral Loss:

- H<sub>2</sub>O (e)  
 NH<sub>3</sub> (\*)

Mass Type:

- Mono  Avg

Mass Tol: 0.5

Update

Peak Assignment:

- Most Intense  Nearest Match

Peak Labels:

- Ion  m/z  None

Width: 600

Height: 450

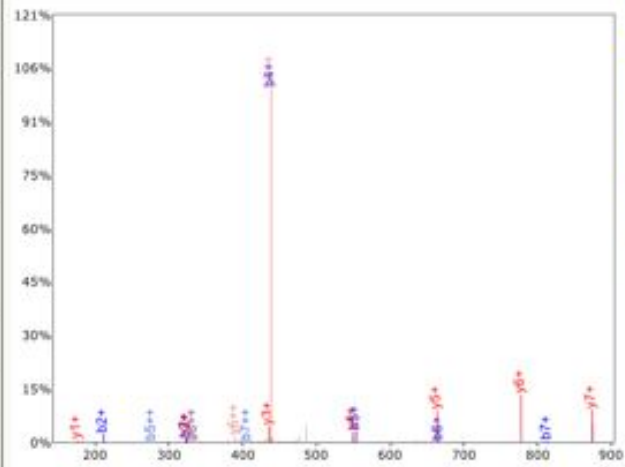

Click and drag in the plot to zoom X: Y: Zoom Out Print Enable tooltip

| b+       | b2+      | # | Seq # | y+ | y2+               |
|----------|----------|---|-------|----|-------------------|
| 104.0913 | 57.5493  | 1 | I     | 8  |                   |
| 211.1441 | 106.0757 | 2 | P     | 7  | 874.4781 637.7427 |
| 314.2383 | 162.6177 | 3 | L     | 6  | 777.4254 389.3183 |
| 418.2711 | 219.6392 | 4 | N     | 5  | 664.3413 332.6743 |
| 553.2980 | 277.1827 | 5 | D     | 4  | 550.2984 275.6528 |
| 646.3821 | 333.8947 | 6 | L     | 3  | 433.2714 218.1394 |
| 853.4505 | 407.2289 | 7 | F     | 2  | 322.1874 161.5973 |
|          |          | 8 | R     | 1  | 175.1190 88.0631  |

[Click] to move table

Static Modifications:

C: 57.0215

| Protein Probab. | Protein     | Tot. Peptides | Unique Peptides | Best Gene Name | Scan # | Charge | Delta Mass | Peptide Prophet Score | Peptide Sequence    |
|-----------------|-------------|---------------|-----------------|----------------|--------|--------|------------|-----------------------|---------------------|
| 0,9865          | IPI00480022 | 1             | 1               | GOLGA7         | 3464   | 2+     | -0,0153    | 0,9999                | K.IYAPQGLLLTDPIER.G |

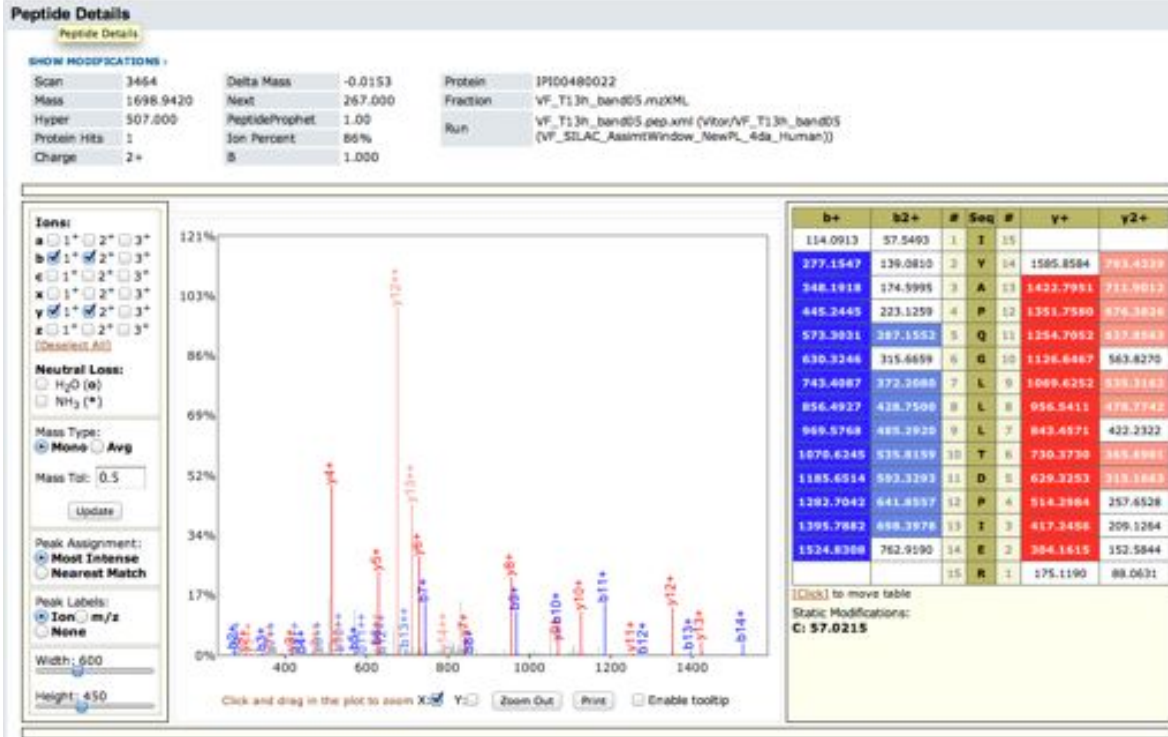

| Protein Probab. | Protein                     | Tot. Peptides | Unique Peptides | Best Gene Name | Scan # | Charge | Delta Mass | Peptide Prophet Score | Peptide Sequence       |
|-----------------|-----------------------------|---------------|-----------------|----------------|--------|--------|------------|-----------------------|------------------------|
| 0,9466          | IPI00909338,<br>IPI00217766 | 1             | 1               | -,<br>SCARB2   | 3465   | 2+     | +0,9761    | 0,9978                | K.NGAPIIMSFPHFYQADER.F |

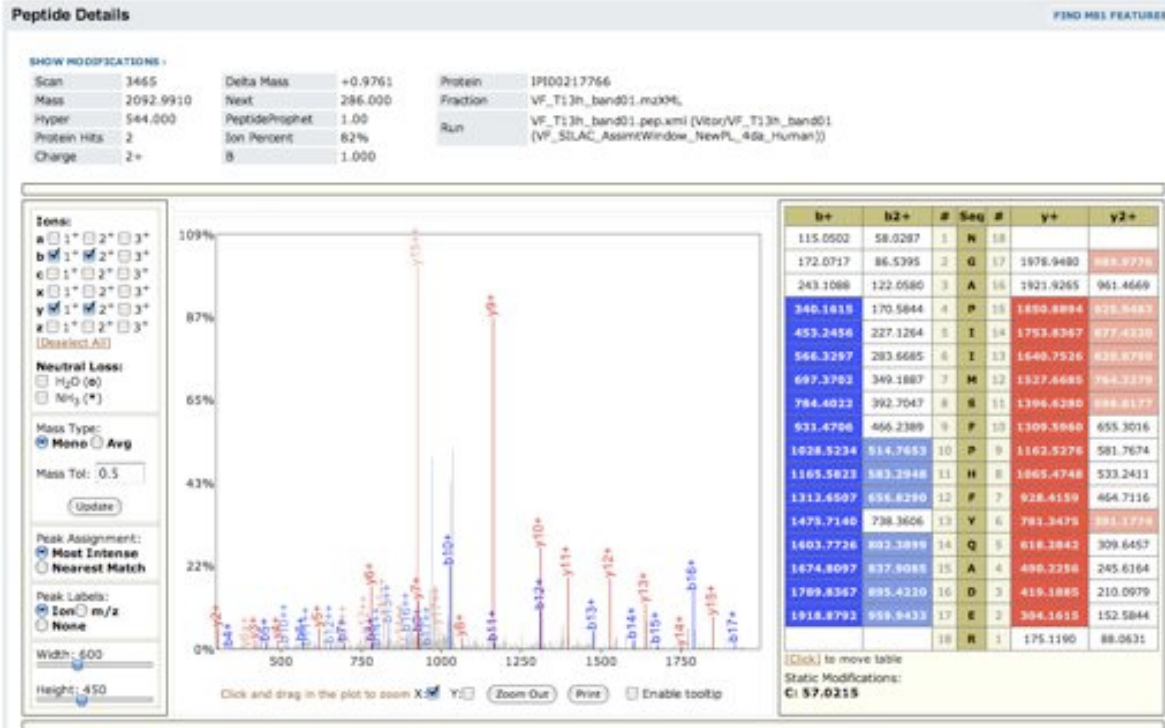



| Protein Probab. | Protein                     | Tot. Peptides | Unique Peptides | Best Gene Name  | Scan # | Charge | Delta Mass | Peptide Prophet Score | Peptide Sequence        |
|-----------------|-----------------------------|---------------|-----------------|-----------------|--------|--------|------------|-----------------------|-------------------------|
| 0,9840          | IPI00790847,<br>IPI00303476 | 1             | 1               | ATP5B,<br>ATP5B | 3473   | 2+     | -0,0178    | 0,9997                | R.AIAELGIYPAVDPLDSTSR.I |

### Peptide Details

#### Peptide Details

##### SHOW MODIFICATIONS

|              |           |                |         |          |                                                                                      |
|--------------|-----------|----------------|---------|----------|--------------------------------------------------------------------------------------|
| Scan         | 3473      | Delta Mass     | -0.0178 | Protein  | IPI00303476                                                                          |
| Mass         | 1988.0330 | Next           | 300.000 | Fraction | VF_T13h_band05.mzXML                                                                 |
| Hyper        | 491.000   | PeptideProphet | 1.00    | Run      | VF_T13h_band05.pep.xml (Vitor/VF_T13h_band05 [VF_SILAC_AssmtWindow_NewPL_4ds_Human]) |
| Protein Hits | 2         | Ion Percent    | 61%     |          |                                                                                      |
| Charge       | 2+        | B              | 1.000   |          |                                                                                      |

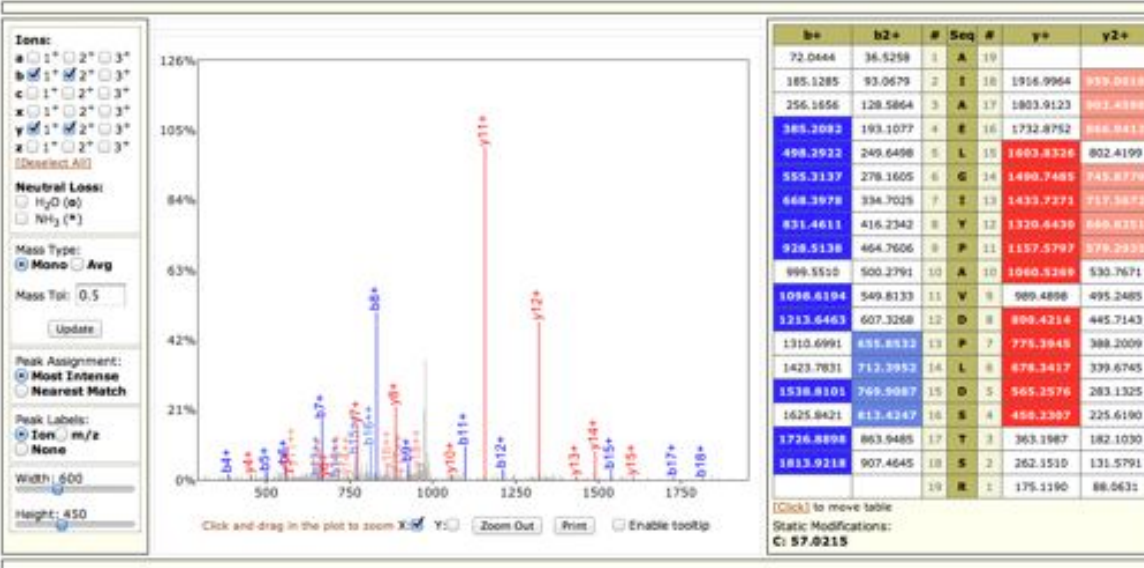

| Protein Probab. | Protein                                     | Tot. Peptides | Unique Peptides | Best Gene Name                  | Scan # | Charge | Delta Mass | Peptide Prophet Score | Peptide Sequence        |
|-----------------|---------------------------------------------|---------------|-----------------|---------------------------------|--------|--------|------------|-----------------------|-------------------------|
| 0,9837          | IPI00795434,<br>IPI00794805,<br>IPI00023974 | 1             | 1               | PTTG1IP,<br>PTTG1IP,<br>PTTG1IP | 3489   | 2+     | -0,0247    | 0,9999                | K.ACLDYPVTSVLPPASLCK'.L |

### Peptide Details

#### Peptide Details

##### SHOW MODIFICATIONS

|              |           |                |         |          |                                                                                      |
|--------------|-----------|----------------|---------|----------|--------------------------------------------------------------------------------------|
| Scan         | 3489      | Delta Mass     | -0.0247 | Protein  | IPI00023974                                                                          |
| Mass         | 1997.0180 | Next           | 289.000 | Fraction | VF_T13h_band04.mzXML                                                                 |
| Hyper        | 571.000   | PeptideProphet | 1.00    | Run      | VF_T13h_band04.pep.xml (Vitor/VF_T13h_band04 (VF_SILAC_AssimWindow_NewPl_4da_Human)) |
| Protein Hits | 3         | Ion Percent    | 76%     |          |                                                                                      |
| Charge       | 2+        | B              | 1.000   |          |                                                                                      |

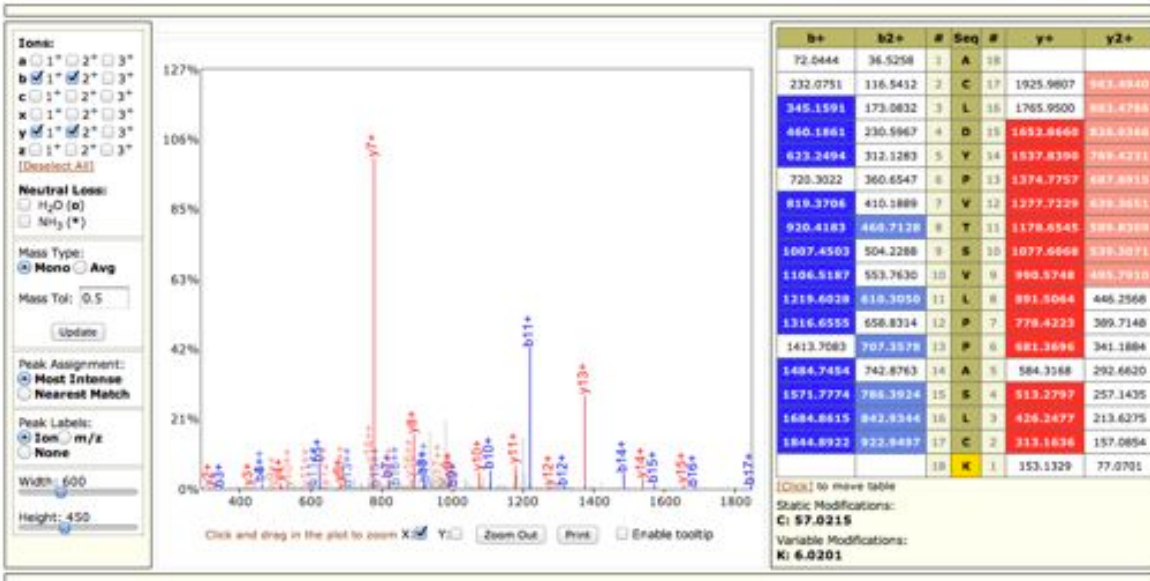

| Protein Probab. | Protein                                                                                     | Tot. Peptides | Unique Peptides | Best Gene Name                                          | Scan # | Charge | Delta Mass | Peptide Prophet Score | Peptide Sequence    |
|-----------------|---------------------------------------------------------------------------------------------|---------------|-----------------|---------------------------------------------------------|--------|--------|------------|-----------------------|---------------------|
| 0,9859          | IPI00843996,<br>IPI00332419,<br>IPI00215907,<br>IPI00010204,<br>IPI00744364,<br>IPI00003377 | 1             | 1               | SFRS3,<br>SFRS7,<br>SFRS7,<br>SFRS3,<br>SFRS7,<br>SFRS7 | 3499   | 2+     | -0,0181    | 0,9997                | R.NPPGFADFVEFEDPR.D |

### Peptide Details

#### SHOW MODIFICATIONS -

|              |           |                 |         |          |                                                                                      |
|--------------|-----------|-----------------|---------|----------|--------------------------------------------------------------------------------------|
| Scan         | 3499      | Delta Mass      | -0.0181 | Protein  | IPI00010204                                                                          |
| Mass         | 1621.7650 | Next            | 295.000 | Fraction | VF_T13h_band06.mzXML                                                                 |
| Hyper        | 538.000   | Peptide/Prophet | 1.00    | Run      | VF_T13h_band06 pep.xml (Vitor/VF_T13h_band06 [VF_SILAC_AssmtWindow_NewPL_4da_Human]) |
| Protein Hits | 6         | Ion Percent     | 85%     |          |                                                                                      |
| Charge       | 2+        | B               | 1.000   |          |                                                                                      |

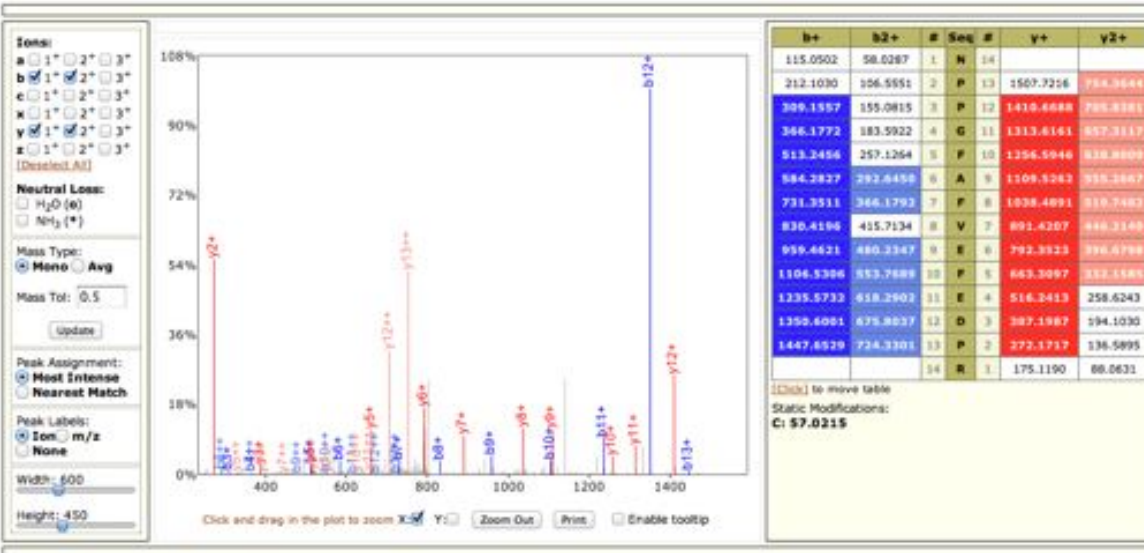

| b+        | b2+      | #  | Seq # | y+        | y2+      |
|-----------|----------|----|-------|-----------|----------|
| 115.0502  | 58.0287  | 1  | N 14  |           |          |
| 212.1030  | 106.5551 | 2  | P 13  | 1507.7256 | 754.3644 |
| 309.1557  | 155.0815 | 3  | P 12  | 1410.6088 | 705.3041 |
| 396.1772  | 183.5922 | 4  | G 11  | 1313.6161 | 657.3117 |
| 513.2456  | 257.1264 | 5  | F 10  | 1256.5946 | 618.2809 |
| 584.2827  | 292.4458 | 6  | A 9   | 1169.5283 | 585.2687 |
| 731.3511  | 366.1792 | 7  | F 8   | 1035.4891 | 510.7483 |
| 830.4194  | 415.7134 | 8  | V 7   | 891.4207  | 446.2148 |
| 959.4421  | 480.2247 | 9  | E 6   | 792.3923  | 396.1938 |
| 1104.5394 | 553.7689 | 10 | F 5   | 643.3897  | 321.6948 |
| 1235.5732 | 618.2902 | 11 | E 4   | 516.2413  | 258.6243 |
| 1359.6081 | 678.8037 | 12 | D 3   | 387.1987  | 194.1030 |
| 1447.6529 | 724.3301 | 13 | P 2   | 272.5717  | 136.5895 |
|           |          | 14 | R 1   | 175.1190  | 88.0631  |

Click to move table  
 Static Modifications:  
 C: 57.0215

| Protein Probab. | Protein     | Tot. Peptides | Unique Peptides | Best Gene Name | Scan # | Charge | Delta Mass | Peptide Prophet Score | Peptide Sequence     |
|-----------------|-------------|---------------|-----------------|----------------|--------|--------|------------|-----------------------|----------------------|
| 0,9877          | IPI00334282 | 1             | 1               | FAM3C          | 3506   | 2+     | -0,0172    | 1,0000                | R.LIADLGSTSITNLGFR.D |

### Peptide Details

#### SHOW MODIFICATIONS

|              |           |                |         |          |                                                                                     |
|--------------|-----------|----------------|---------|----------|-------------------------------------------------------------------------------------|
| Scan         | 3506      | Delta Mass     | -0.0172 | Protein  | IPI00334282                                                                         |
| Mass         | 1677.9170 | Next           | 302.000 | Fraction | VF_T13H_band05.mpkML                                                                |
| Hyper        | 753.000   | PeptideProphet | 1.00    | Run      | VF_T13H_band05 pep.xml (Vkor/VF_T13H_band05 (VF_SILAC_AssmtWindow_NewPL_4da_Human)) |
| Protein Hits | 1         | Ion Percent    | 87%     |          |                                                                                     |
| Charge       | 2+        | B              | 1.000   |          |                                                                                     |

- Ions:**
- a  1\*  2\*  3\*
  - b  1\*  2\*  3\*
  - c  1\*  2\*  3\*
  - x  1\*  2\*  3\*
  - y  1\*  2\*  3\*
  - z  1\*  2\*  3\*

[\[Deselect All\]](#)

**Neutral Loss:**

- H<sub>2</sub>O (0)
- NH<sub>3</sub> (\*)

Mass Type:

Mono  Avg

Mass Tol: 0.5

[Update](#)

Peak Assignment:

Most Intense

Nearest Match

Peak Labels:

Ion\_m/z

None

Width: 600

Height: 450

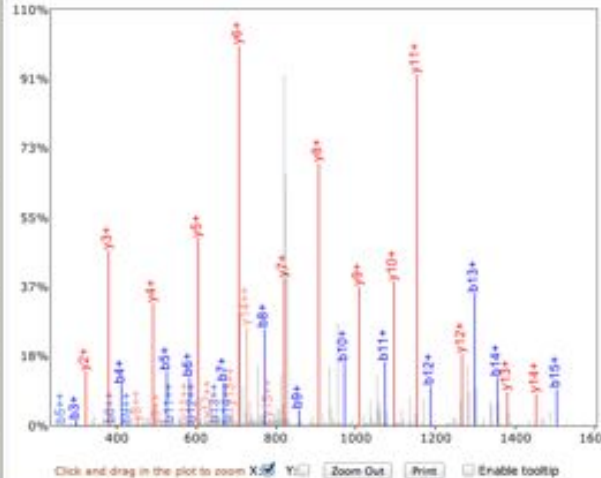

| b+        | b2+      | #  | Seq # | y+        | y2+      |
|-----------|----------|----|-------|-----------|----------|
| 114.0913  | 57.5493  | 1  | L 16  |           |          |
| 227.1754  | 114.0913 | 2  | I 35  | 1564.8329 | 782.9201 |
| 298.2125  | 149.6099 | 3  | A 14  | 1451.7489 | 725.3793 |
| 413.2395  | 207.1234 | 4  | D 23  | 1380.7118 | 690.8595 |
| 526.3235  | 263.6654 | 5  | L 12  | 1265.6848 | 633.3403 |
| 583.3450  | 292.1761 | 6  | G 11  | 1152.6908 | 576.8049 |
| 670.3770  | 335.6921 | 7  | S 10  | 1095.5793 | 548.2933 |
| 771.4247  | 386.2160 | 8  | T 9   | 1088.5473 | 544.7773 |
| 858.4587  | 429.7320 | 9  | S 8   | 997.4994  | 498.3324 |
| 973.5488  | 486.2740 | 10 | I 7   | 820.4674  | 410.7374 |
| 1072.5885 | 536.7979 | 11 | T 6   | 787.3835  | 394.1954 |
| 1186.6214 | 593.3193 | 12 | W 5   | 684.3358  | 302.6715 |
| 1299.7155 | 650.3614 | 13 | L 4   | 492.2929  | 246.6501 |
| 1356.7369 | 678.8721 | 14 | G 3   | 379.2888  | 190.1081 |
| 1502.8033 | 752.4063 | 15 | F 2   | 323.1874  | 161.5973 |
|           |          | 16 | R 1   | 175.1190  | 88.0631  |

[\[Click\]](#) to move table

Static Modifications:

**C: 57.0215**

| Protein Probab. | Protein     | Tot. Peptides | Unique Peptides | Best Gene Name | Scan # | Charge | Delta Mass | Peptide Prophet Score | Peptide Sequence   |
|-----------------|-------------|---------------|-----------------|----------------|--------|--------|------------|-----------------------|--------------------|
| 0,8983          | IPI00016342 | 1             | 1               | RAB7A          | 3528   | 2+     | -0,0120    | 0,9946                | K.EAINVEQAFQTIAR.N |

**Peptide Details** FIND MS1 FEATURES

SHOW MODIFICATIONS

|                 |                      |                                                                                            |
|-----------------|----------------------|--------------------------------------------------------------------------------------------|
| Scan: 3528      | Delta Mass: -0.0120  | Protein: IPI00016342                                                                       |
| Mass: 1589.8280 | Next: 250.000        | Fraction: VF_T13h_band01.mzXML                                                             |
| Hyper: 365.000  | PeptideProphet: 0.99 | Run: VF_T13h_band01.pep.xml (Vitor/VF_T13h_band01 (VF_SILAC_AssimtWindow_NewPL_4da_Human)) |
| Protein Hits: 1 | Ion Percent: 58%     |                                                                                            |
| Charge: 2+      | B: 1.000             |                                                                                            |

  

**Ions:**

a  1\*  2\*  3\*

b  1\*  2\*  3\*

c  1\*  2\*  3\*

x  1\*  2\*  3\*

y  1\*  2\*  3\*

z  1\*  2\*  3\*

[\[Deselect All\]](#)

**Neutral Loss:**

H<sub>2</sub>O (0)

NH<sub>3</sub> (\*)

**Mass Type:**

None  Avg

Mass Tol: 0.5

[Update](#)

**Peak Assignment:**

Most Intense

Nearest Match

**Peak Labels:**

Ion() m/z

None

Width: 600

Height: 450

Click and drag in the plot to zoom. X: 800 Y: 100% [Zoom Out](#) [Print](#)  Enable tooltip

| b+        | b2+      | #  | Seq # | y+        | y2+      |
|-----------|----------|----|-------|-----------|----------|
| 130.0498  | 65.5286  | 1  | E 14  |           |          |
| 201.0870  | 101.0471 | 2  | A 13  | 1465.7856 | 738.8944 |
| 314.1710  | 157.5852 | 3  | I 12  | 1389.7485 | 693.3776 |
| 428.2140  | 214.6156 | 4  | N 11  | 1376.6644 | 638.8359 |
| 527.2824  | 264.1448 | 5  | V 10  | 1162.4215 | 581.8144 |
| 656.3250  | 328.6661 | 6  | E 9   | 1463.5531 | 532.2852 |
| 784.3836  | 392.6954 | 7  | Q 8   | 934.5185  | 467.7589 |
| 895.4287  | 428.2140 | 8  | A 7   | 806.4519  | 403.7296 |
| 1002.4881 | 501.7482 | 9  | F 6   | 735.4148  | 368.2110 |
| 1130.5477 | 565.7775 | 10 | Q 5   | 588.3464  | 294.6768 |
| 1231.5983 | 616.3013 | 11 | T 4   | 468.2878  | 230.6475 |
| 1344.6794 | 672.8433 | 12 | I 3   | 399.3481  | 180.1237 |
| 1415.7165 | 708.3619 | 13 | A 2   | 346.1861  | 123.5817 |
|           |          | 14 | R 1   | 175.1190  | 88.0631  |

[\[Click\]](#) to move table

Static Modifications:

**C: 57.0215**

| Protein Probab. | Protein                                     | Tot. Peptides | Unique Peptides | Best Gene Name         | Scan # | Charge | Delta Mass | Peptide Prophet Score | Peptide Sequence |
|-----------------|---------------------------------------------|---------------|-----------------|------------------------|--------|--------|------------|-----------------------|------------------|
| 0,9783          | IP100794082,<br>IP100219575,<br>IP100873294 | 1             | 1               | BLMH,<br>BLMH,<br>BLMH | 3565   | 2+     | -0,0150    | 0,9998                | K.IGPITPLEFYR.E  |

### Peptide Details

#### SHOW MODIFICATIONS

|              |           |                 |         |          |                                                                                         |
|--------------|-----------|-----------------|---------|----------|-----------------------------------------------------------------------------------------|
| Scan         | 3565      | Delta Mass      | -0.0150 | Protein  | IP100219575                                                                             |
| Mass         | 1305.7200 | Next            | 305.000 | Fraction | VF_T13h_band02.mzML                                                                     |
| Hyper        | 527.000   | Peptide Prophet | 1.00    | Run      | VF_T13h_band02.pep.xml (Vitor/VF_T13h_band02<br>(vF_SILAC_AssmtWindow_NewPL_4da_Human)) |
| Protein Hits | 3         | Ion Percent     | 80%     |          |                                                                                         |
| Charge       | 2+        | B               | 1.000   |          |                                                                                         |

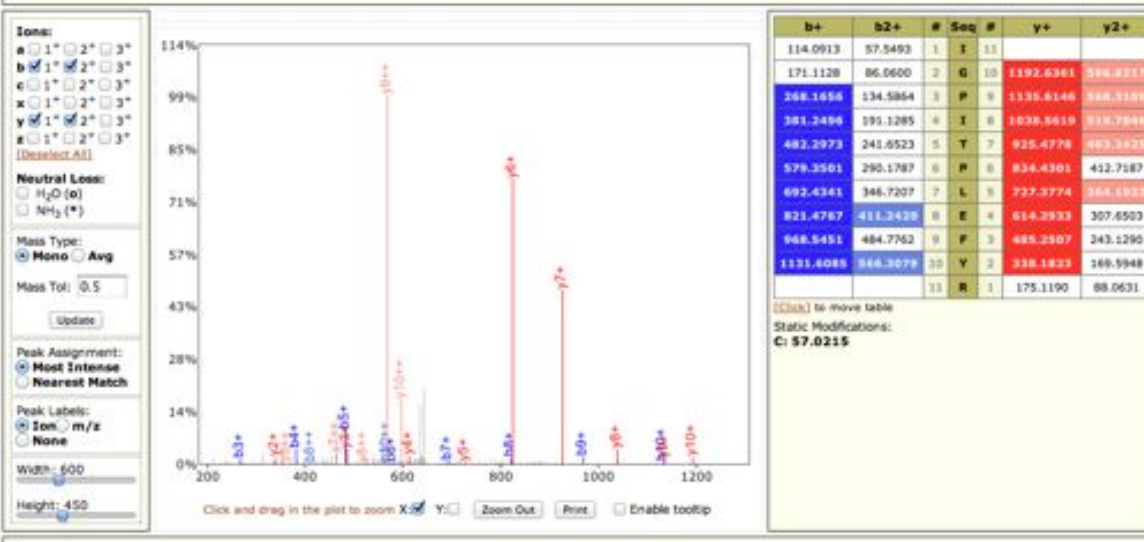

| Protein Probab. | Protein                                     | Tot. Peptides | Unique Peptides | Best Gene Name    | Scan # | Charge | Delta Mass | Peptide Prophet Score | Peptide Sequence       |
|-----------------|---------------------------------------------|---------------|-----------------|-------------------|--------|--------|------------|-----------------------|------------------------|
| 0,9880          | IP100908715,<br>IP100020944,<br>IP100909060 | 1             | 1               | -,<br>FDFT1,<br>- | 3577   | 2+     | -0,0233    | 1,0000                | R.LFSASEFEDPLVGEDTER.A |

### Peptide Details

#### SHOW MODIFICATIONS

|              |           |                 |         |          |                                               |
|--------------|-----------|-----------------|---------|----------|-----------------------------------------------|
| Scan         | 3577      | Delta Mass      | -0.0233 | Protein  | IP00020944                                    |
| Mass         | 2040.9400 | Next            | 288.000 | Fraction | VF_T13h_band03.mzXML                          |
| Hyper        | 628.000   | Peptide/Prophet | 1.00    | Run      | VF_T13h_band03.pep.xml (Vitor/VF_T13h_band03) |
| Protein Hits | 3         | Ion Percent     | 79%     |          | (VF_SILAC_AssmtWindow_NewPL_4da_Human)        |
| Charge       | 2+        | B               | 1.000   |          |                                               |

#### Zions:

- 1\*  2\*  3\*  
 1\*  2\*  3\*  
 1\*  2\*  3\*  
 1\*  2\*  3\*  
 1\*  2\*  3\*  
 1\*  2\*  3\*  
 1\*  2\*  3\*

#### Neutral Loss:

- H<sub>2</sub>O (\*)  
 NH<sub>3</sub> (\*)

#### Mass Type:

- Mono  Avg

Mass Tol: 0.5

Update

#### Peak Assignment:

- Most Intense  
 Nearest Match

#### Peak Labels:

- Ion  m/z  
 None

Width: 600

Height: 450

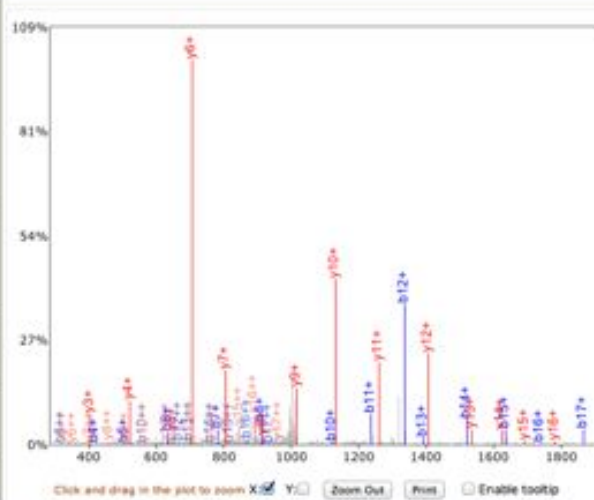

| b+        | b2+      | #  | Seq # | y+        | y2+      |
|-----------|----------|----|-------|-----------|----------|
| 114.0913  | 57.5493  | 1  | L 18  |           |          |
| 261.1598  | 131.0835 | 2  | F 17  | 1927.8556 | 944.4314 |
| 348.1918  | 174.5995 | 3  | S 16  | 1780.7872 | 890.8972 |
| 419.2289  | 208.1181 | 4  | A 15  | 1493.7552 | 847.3812 |
| 506.2699  | 253.6341 | 5  | S 14  | 1432.7180 | 811.8617 |
| 625.3835  | 318.1554 | 6  | E 13  | 1335.6860 | 768.3468 |
| 782.3719  | 391.6896 | 7  | F 12  | 1404.4434 | 782.6233 |
| 911.4145  | 456.2109 | 8  | E 11  | 1259.5750 | 636.3911 |
| 1026.4415 | 513.7244 | 9  | D 10  | 1130.5324 | 540.7898 |
| 1123.4842 | 562.2808 | 10 | P 9   | 1015.5095 | 508.2864 |
| 1236.5783 | 618.7928 | 11 | L 8   | 918.4827  | 458.7300 |
| 1335.6467 | 668.3276 | 12 | V 7   | 805.3486  | 403.1889 |
| 1392.6882 | 696.8372 | 13 | G 6   | 706.3002  | 311.6317 |
| 1521.7108 | 761.3990 | 14 | E 5   | 649.2788  | 235.1430 |
| 1636.7377 | 818.8725 | 15 | D 4   | 526.2362  | 260.6217 |
| 1737.7854 | 869.3963 | 16 | T 3   | 405.2092  | 203.1082 |
| 1866.8280 | 933.9176 | 17 | E 2   | 304.1615  | 152.5844 |
|           |          | 18 | N 1   | 175.1190  | 88.0831  |

Check to move table  
 Static Modifications:  
 C: 57.0215

| Protein Probab. | Protein                     | Tot. Peptides | Unique Peptides | Best Gene Name    | Scan # | Charge | Delta Mass | Peptide Prophet Score | Peptide Sequence |
|-----------------|-----------------------------|---------------|-----------------|-------------------|--------|--------|------------|-----------------------|------------------|
| 0,9849          | IPI00029266,<br>IPI00068430 | 1             | 1               | SNRPE,<br>SNRPEL1 | 3601   | 2+     | -0,0147    | 0,9996                | K.VM"VQPINLIFR.Y |

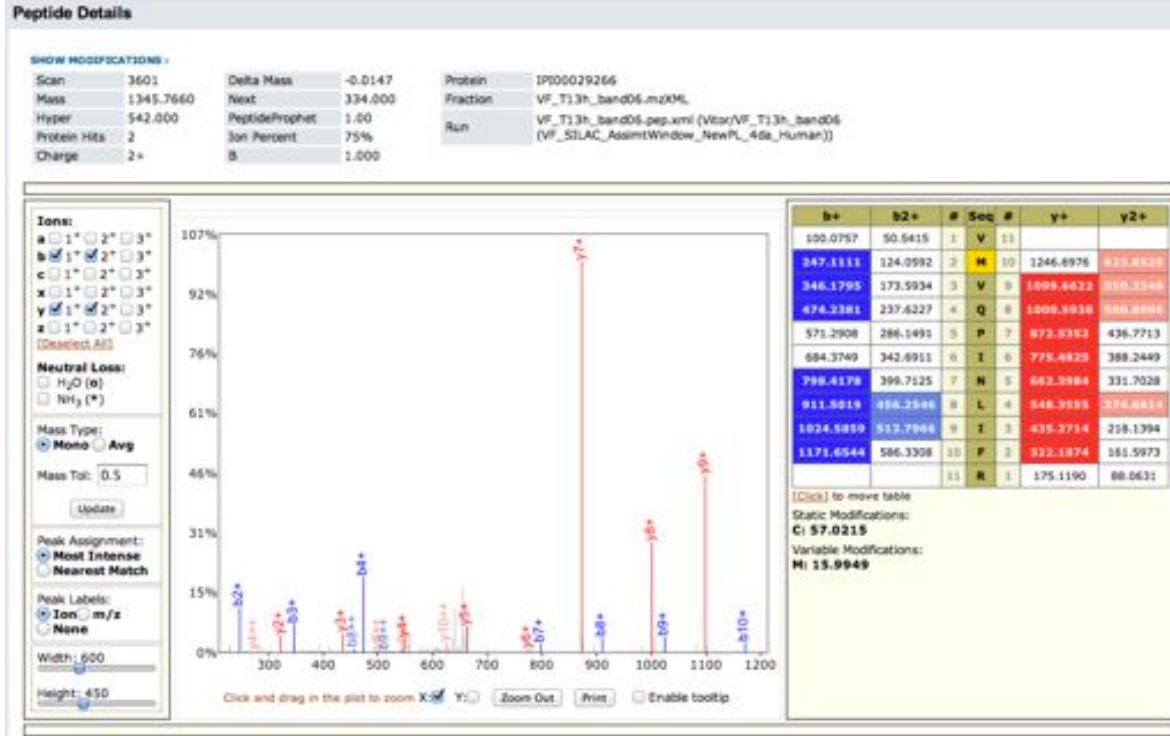



| Protein Probab. | Protein     | Tot. Peptides | Unique Peptides | Best Gene Name | Scan # | Charge | Delta Mass | Peptide Prophet Score | Peptide Sequence        |
|-----------------|-------------|---------------|-----------------|----------------|--------|--------|------------|-----------------------|-------------------------|
| 0,9881          | IPI00103599 | 1             | 1               | BRI3BP         | 3609   | 2+     | -0,0225    | 0,9999                | R.TVNTFSQSVSSLFGEDNVR.A |

### Peptide Details

#### SHOW MODIFICATIONS

|              |           |                 |         |          |                                                                                       |
|--------------|-----------|-----------------|---------|----------|---------------------------------------------------------------------------------------|
| Scan         | 3609      | Delta Mass      | -0.0225 | Protein  | IPI00103599                                                                           |
| Mass         | 2087.0040 | Next            | 323.000 | Fraction | VF_T13h_band06.mzXML                                                                  |
| Hyper        | 725.000   | Peptide/Prophet | 1.00    | Run      | VF_T13h_band06.pep.xml (Vitor/VF_T13h_band06 (VF_SILAC_AssimtWindow_NewPL_4da_Human)) |
| Protein Hits | 1         | Ion Percent     | 81%     |          |                                                                                       |
| Charge       | 2+        | B               | 1.000   |          |                                                                                       |

- Ions:**
- 1<sup>+</sup>  2<sup>+</sup>  3<sup>+</sup>
  - 1<sup>+</sup>  2<sup>+</sup>  3<sup>+</sup>
- [\[Deselect All\]](#)

- Neutral Loss:**
- H<sub>2</sub>O (a)
  - NH<sub>3</sub> (\*)

- Mass Type:**
- Mono
  - Avg
- Mass Tol: 0.5
- [Update](#)

- Peak Assignment:**
- Most Intense
  - Nearest Match

- Peak Labels:**
- Ion
  - m/z
  - None

Width: 500  
Height: 450

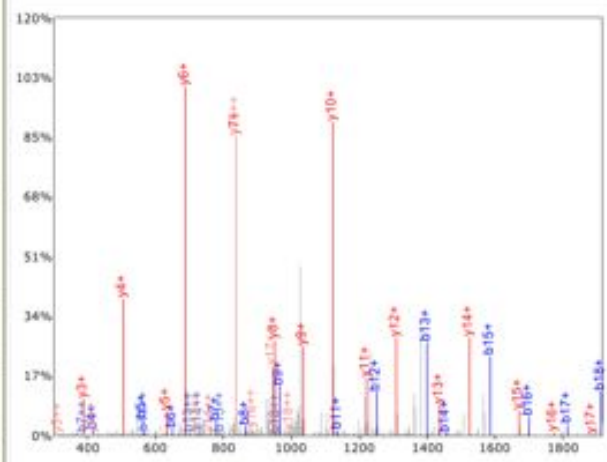

Click and drag in the plot to zoom X: Y: [Zoom Out](#) [Print](#)  Enable tooltip

| b+        | b2+      | #  | Seq # | y+        | y2+      |
|-----------|----------|----|-------|-----------|----------|
| 102.0550  | 51.5311  | 1  | T 19  |           |          |
| 201.2234  | 101.2653 | 2  | V 18  | 1985.9563 | 983.4813 |
| 315.1663  | 158.0868 | 3  | N 17  | 1886.8879 | 943.9476 |
| 416.2140  | 208.4106 | 4  | T 16  | 1772.8450 | 886.8262 |
| 543.2824  | 282.1448 | 5  | F 15  | 1671.7973 | 838.4022 |
| 690.3144  | 325.6608 | 6  | S 14  | 1534.7289 | 763.8681 |
| 778.3730  | 389.6991 | 7  | Q 13  | 1437.6968 | 718.3321 |
| 845.4050  | 433.2061 | 8  | S 12  | 1399.6383 | 655.3228 |
| 964.4734  | 482.7404 | 9  | V 11  | 1322.6062 | 611.8068 |
| 1051.5055 | 526.2564 | 10 | S 10  | 1233.5378 | 562.2726 |
| 1138.5375 | 569.7724 | 11 | S 9   | 1036.3058 | 518.7565 |
| 1251.6214 | 626.3144 | 12 | L 8   | 949.4738  | 475.2405 |
| 1398.6905 | 699.8486 | 13 | F 7   | 836.3897  | 418.0903 |
| 1455.7114 | 728.3594 | 14 | G 6   | 689.3313  | 345.1643 |
| 1584.7540 | 792.4007 | 15 | E 5   | 632.2998  | 318.6036 |
| 1699.7818 | 850.3941 | 16 | D 4   | 583.2572  | 252.1323 |
| 1813.8239 | 907.4156 | 17 | N 3   | 388.2303  | 194.6188 |
| 1912.8923 | 956.9498 | 18 | V 2   | 274.1874  | 137.5973 |
|           |          | 19 | R 1   | 175.1190  | 88.0631  |

[\[Click\]](#) to move table  
Static Modifications:  
C: 57.0215

| Protein Probab. | Protein                     | Tot. Peptides | Unique Peptides | Best Gene Name    | Scan # | Charge | Delta Mass | Peptide Prophet Score | Peptide Sequence |
|-----------------|-----------------------------|---------------|-----------------|-------------------|--------|--------|------------|-----------------------|------------------|
| 0,9478          | IPI00029266,<br>IPI00068430 | 1             | 1               | SNRPE,<br>SNRPEL1 | 3613   | 2+     | -0,0153    | 0,9966                | K.VM"VQPINLIFR.Y |

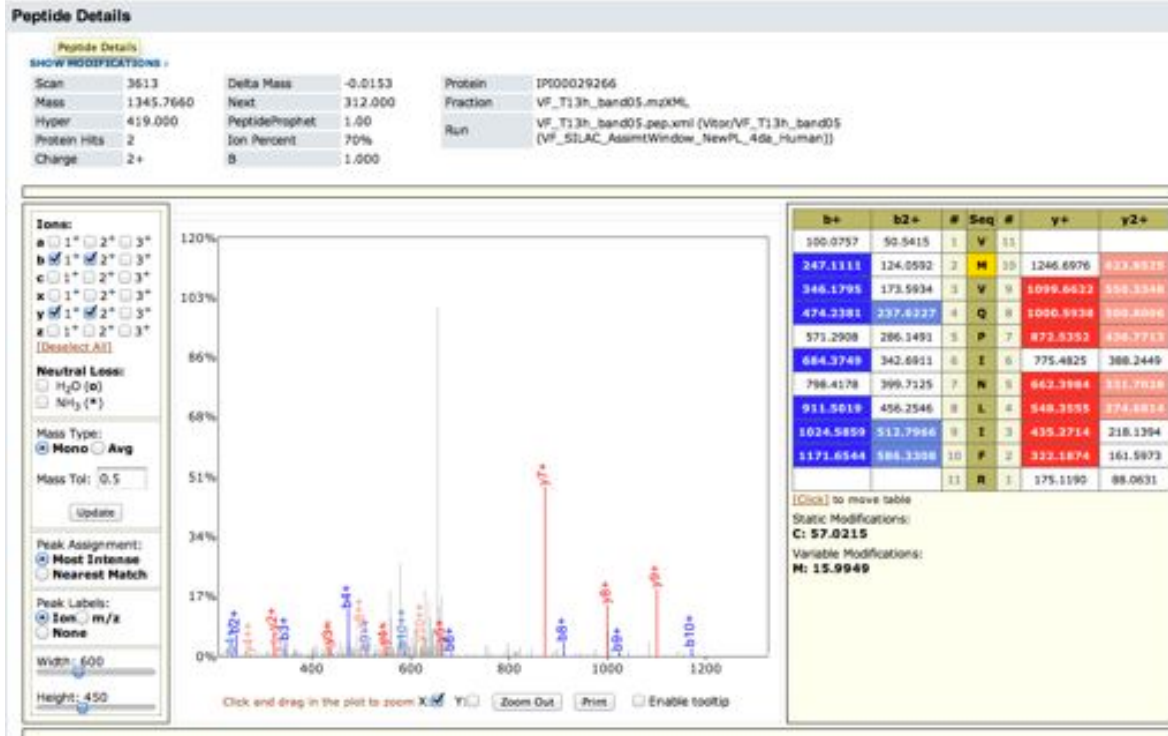

| Protein Probab. | Protein                     | Tot. Peptides | Unique Peptides | Best Gene Name  | Scan # | Charge | Delta Mass | Peptide Prophet Score | Peptide Sequence |
|-----------------|-----------------------------|---------------|-----------------|-----------------|--------|--------|------------|-----------------------|------------------|
| 0,9301          | IPI00791418,<br>IPI00025252 | 1             | 1               | PDIA3,<br>PDIA3 | 3616   | 2+     | -0,0134    | 0,9950                | R.ELSDFISYLQR.E  |

**Peptide Details**

Peptide Details

SHOW MODIFICATIONS

|                 |                      |                                                                                           |
|-----------------|----------------------|-------------------------------------------------------------------------------------------|
| Scan: 3616      | Delta Mass: -0.0134  | Protein: IPI00025252                                                                      |
| Mass: 1370.6950 | Next: 266.000        | Fraction: VF_T13h_band05.mzXML                                                            |
| Hyper: 371.000  | PeptideProphet: 1.00 | Run: VF_T13h_band05.pep.xml (Vitor/VF_T13h_band05 (VF_SILAC_AssmtWindow_NewPL_4da_Human)) |
| Protein Hits: 2 | Ion Percent: 70%     |                                                                                           |
| Charge: 2+      | B: 0.000             |                                                                                           |

  

**Ions:**

1<sup>+</sup>  2<sup>+</sup>  3<sup>+</sup>

b1<sup>+</sup>  b2<sup>+</sup>  b3<sup>+</sup>

c1<sup>+</sup>  c2<sup>+</sup>  c3<sup>+</sup>

x1<sup>+</sup>  x2<sup>+</sup>  x3<sup>+</sup>

y1<sup>+</sup>  y2<sup>+</sup>  y3<sup>+</sup>

z1<sup>+</sup>  z2<sup>+</sup>  z3<sup>+</sup>

[\[Deselect All\]](#)

**Neutral Loss:**

H<sub>2</sub>O (a)

NH<sub>3</sub> (\*)

**Mass Type:**

Mono  Avg

Mass Tol: 0.5

[Update](#)

**Peak Assignment:**

Most Intense  Nearest Match

**Peak Labels:**

Ion m/z  None

Width: 500

Height: 450

Click and drag in the plot to zoom X:  Y:  [Zoom Out](#) [Invis](#)  Enable tooltip

| b+        | b2+      | #  | Seq | #  | y+        | y2+      |
|-----------|----------|----|-----|----|-----------|----------|
| 130.0499  | 65.5286  | 1  | E   | 11 |           |          |
| 243.1339  | 122.0706 | 2  | L   | 10 | 1241.6525 | 631.3294 |
| 330.1660  | 165.5866 | 3  | S   | 9  | 1138.5984 | 364.7979 |
| 445.1929  | 221.1061 | 4  | D   | 8  | 1041.5364 | 521.2738 |
| 592.2613  | 296.6243 | 5  | F   | 7  | 926.5094  | 463.7584 |
| 705.3454  | 353.1763 | 6  | I   | 6  | 779.4419  | 390.2241 |
| 792.3774  | 396.6923 | 7  | S   | 5  | 686.3170  | 333.6821 |
| 955.4497  | 478.2240 | 8  | V   | 4  | 579.3249  | 290.1661 |
| 1048.5248 | 524.7660 | 9  | L   | 3  | 416.2616  | 208.6344 |
| 1194.5834 | 598.7953 | 10 | Q   | 2  | 303.1775  | 152.0924 |
|           |          | 11 | R   | 1  | 175.1190  | 88.0631  |

[\[Click\]](#) to move table

Static Modifications:

C: 57.0215

| Protein Probab. | Protein                     | Tot. Peptides | Unique Peptides | Best Gene Name | Scan # | Charge | Delta Mass | Peptide Prophet Score | Peptide Sequence      |
|-----------------|-----------------------------|---------------|-----------------|----------------|--------|--------|------------|-----------------------|-----------------------|
| 0,9877          | IPI00894460,<br>IPI00017373 | 1             | 1               | RPA3,<br>RPA3  | 3658   | 2+     | -0,0213    | 1,0000                | K.IIHDFPQFYPLGIVQHD.- |

### Peptide Details

#### SHOW MODIFICATIONS -

|              |           |                |         |          |                                                                                      |
|--------------|-----------|----------------|---------|----------|--------------------------------------------------------------------------------------|
| Scan         | 3658      | Delta Mass     | -0.0213 | Protein  | IPI00017373                                                                          |
| Mass         | 2039.0390 | Next           | 315.000 | Fraction | VF_T13h_band05.mzXML                                                                 |
| Hyper        | 775.050   | PeptideProphet | 1.00    | Run      | VF_T13h_band05.pep.xml (Vitor/VF_T13h_band05 (VF_SILAC_AssmtWindow_NewPL_4da_Human)) |
| Protein Hits | 2         | Ion Percent    | 81%     |          |                                                                                      |
| Charge       | 2+        | B              | 2.000   |          |                                                                                      |

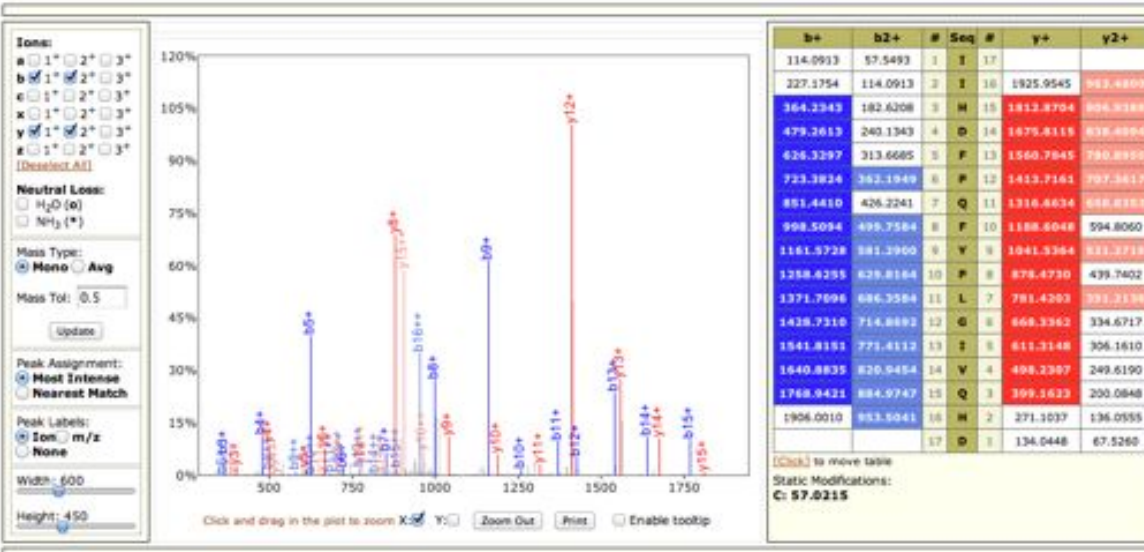

| Protein Probab. | Protein     | Tot. Peptides | Unique Peptides | Best Gene Name | Scan # | Charge | Delta Mass | Peptide Prophet Score | Peptide Sequence |
|-----------------|-------------|---------------|-----------------|----------------|--------|--------|------------|-----------------------|------------------|
| 0,9636          | IPI00029665 | 1             | 1               | MMAB           | 3685   | 2+     | -0,0130    | 0,9985                | R.LSDYLFTLAR.Y   |

Peptide Details

SHOW MODIFICATIONS -

|              |           |                |         |          |                                                                                     |
|--------------|-----------|----------------|---------|----------|-------------------------------------------------------------------------------------|
| Scan         | 3685      | Delta Mass     | -0.0130 | Protein  | IPI00029665                                                                         |
| Mass         | 1198.6470 | Next           | 341.000 | Fraction | VF_T13h_band04.mzXML                                                                |
| Hyper        | 473.000   | PeptideProphet | 1.00    | Run      | VF_T13h_band04.pep.xml (Vfor/VF_T13h_band04 [VF_SILAC_AssmtWindow_NewPL_4de_Human]) |
| Protein Hits | 1         | Ion Percent    | 94%     |          |                                                                                     |
| Charge       | 2+        | B              | 1.000   |          |                                                                                     |

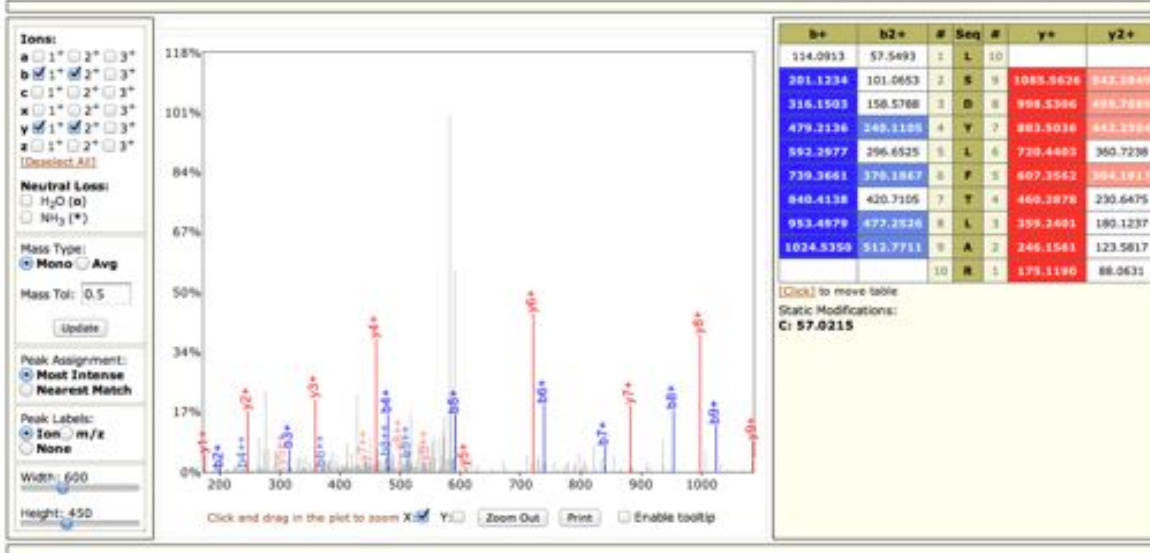

| Protein Probab. | Protein     | Tot. Peptides | Unique Peptides | Best Gene Name | Scan # | Charge | Delta Mass | Peptide Prophet Score | Peptide Sequence               |
|-----------------|-------------|---------------|-----------------|----------------|--------|--------|------------|-----------------------|--------------------------------|
| 0,9816          | IPI00301579 | 1             | 1               | NPC2           | 3712   | 2+     | +0,0089    | 0,9995                | K.AVVHGILM"GVPVVPFPIPEPDGCK'.S |

### Peptide Details

#### SHOW MODIFICATIONS -

|              |           |                |         |          |                                              |
|--------------|-----------|----------------|---------|----------|----------------------------------------------|
| Scan         | 3712      | Delta Mass     | +0.0089 | Protein  | IPI00301579                                  |
| Mass         | 2451.2870 | Next           | 301.000 | Fraction | VF_T13h_band05.mzXML                         |
| Hyper        | 627.000   | PeptideProphet | 1.00    | Run      | VF_T13h_band05.pep.xml (Vitor/VF_T13h_band05 |
| Protein Hits | 1         | Ion Percent    | 68%     |          | (VF_S1AC_AssimWindow_NewPL_40a_Human))       |
| Charge       | 2+        | B              | 1.000   |          |                                              |

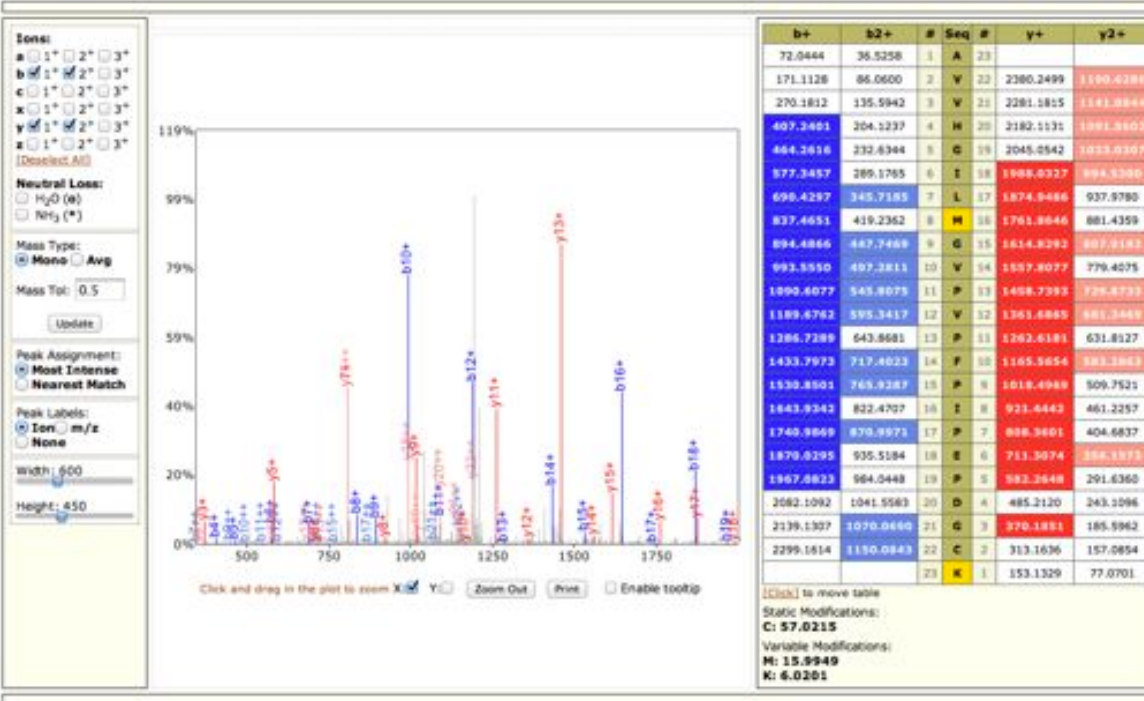

| Protein Probab. | Protein                     | Tot. Peptides | Unique Peptides | Best Gene Name  | Scan # | Charge | Delta Mass | Peptide Prophet Score | Peptide Sequence          |
|-----------------|-----------------------------|---------------|-----------------|-----------------|--------|--------|------------|-----------------------|---------------------------|
| 0,9783          | IPI00796075,<br>IPI00014230 | 1             | 1               | C1QBP,<br>C1QBP | 3723   | 2+     | -0,0205    | 0,9998                | K.VEEQEPELTSTPNFVVEVIK'.N |

Peptide Details

SHOW MODIFICATIONS:

|              |           |                |         |          |                                              |
|--------------|-----------|----------------|---------|----------|----------------------------------------------|
| Scan         | 3723      | Delta Mass     | -0.0205 | Protein  | IPI00014230                                  |
| Mass         | 2293.1910 | Next           | 261.000 | Fraction | VF_T13h_band02.mzXML                         |
| Hyper        | 474.000   | PeptideProphet | 1.00    | Run      | VF_T13h_band02.pep.xml (Vitor/VF_T13h_band02 |
| Protein Hits | 2         | Ion Percent    | 68%     |          | [VF_SILAC_AssayWindow_NewPL_4da_Human]]      |
| Charge       | 2+        | B              | 1.000   |          |                                              |

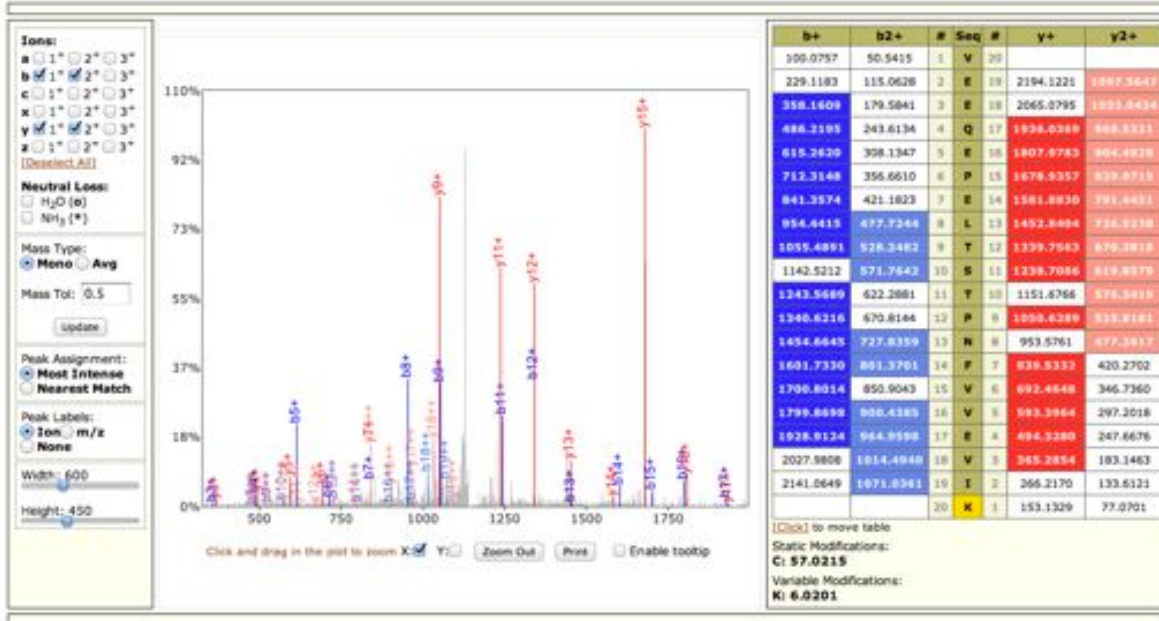

| Protein Probab. | Protein     | Tot. Peptides | Unique Peptides | Best Gene Name | Scan # | Charge | Delta Mass | Peptide Prophet Score | Peptide Sequence          |
|-----------------|-------------|---------------|-----------------|----------------|--------|--------|------------|-----------------------|---------------------------|
| 0,9859          | IPI00019472 | 1             | 1               | SLC1A5         | 3736   | 2+     | -0,0226    | 0,9997                | K.SELPLDPLPVPTEEGNPLLK'.H |

Peptide Details

SHOW MODIFICATIONS -

|              |           |                |         |          |                                                                                      |
|--------------|-----------|----------------|---------|----------|--------------------------------------------------------------------------------------|
| Scan         | 3736      | Delta Mass     | -0.0226 | Protein  | IPI00019472                                                                          |
| Mass         | 2164.1840 | Next           | 291.000 | Fraction | VF_T13h_band06.mzXML                                                                 |
| Hyper        | 525.000   | PeptideProphet | 1.00    | Run      | VF_T13h_band06.pep.xml (Vltpr/VF_T13h_band06 (VF_SILAC_AssayWindow_NewPL_46a_Human)) |
| Protein Hits | 1         | Ion Percent    | 76%     |          |                                                                                      |
| Charge       | 2+        | B              | 1.000   |          |                                                                                      |

Ions:

- 1\*  2\*  3\*  
 1\*  2\*  3\*  
 1\*  2\*  3\*  
 1\*  2\*  3\*  
 1\*  2\*  3\*  
 1\*  2\*  3\*  
 1\*  2\*  3\*

[Deselect All]

Neutral Loss:

- H<sub>2</sub>O (0)  
 NH<sub>3</sub> (\*)

Mass Type:

- Mono  Avg

Mass Tol: 0.5

Update

Peak Assignment:

- Most Intense  Nearest Match

Peak Labels:

- Ion  m/z  None

Width: 600

Height: 450

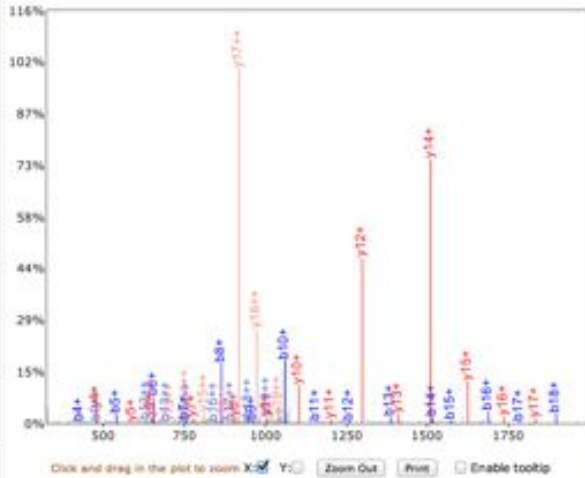

| b+        | b2+       | #  | Seq # | y+        | y2+       |
|-----------|-----------|----|-------|-----------|-----------|
| 88.0393   | 44.5233   | 1  | S 25  |           |           |
| 217.0619  | 109.0446  | 2  | E 19  | 2077.1522 | 1039.0798 |
| 330.1660  | 165.0866  | 3  | L 18  | 1948.1097 | 979.0363  |
| 427.2187  | 214.1130  | 4  | P 17  | 1829.0236 | 918.0164  |
| 540.3028  | 270.6550  | 5  | L 16  | 1727.8728 | 860.4301  |
| 655.3297  | 326.1685  | 6  | D 15  | 1624.8888 | 813.9488  |
| 752.3825  | 376.0949  | 7  | P 14  | 1509.8618 | 760.4345  |
| 865.4666  | 433.2369  | 8  | L 13  | 1412.8091 | 706.9882  |
| 962.5193  | 481.7633  | 9  | P 12  | 1299.7256 | 660.5061  |
| 1061.5877 | 531.2975  | 10 | V 11  | 1202.6722 | 601.8388  |
| 1158.4405 | 579.8239  | 11 | P 10  | 1103.6038 | 552.3055  |
| 1259.4882 | 630.3477  | 12 | T 9   | 1006.5511 | 503.7792  |
| 1388.7398 | 694.8699  | 13 | E 8   | 945.6034  | 453.2553  |
| 1517.7734 | 759.3903  | 14 | E 7   | 776.6608  | 388.7340  |
| 1674.7946 | 787.9011  | 15 | D 6   | 647.4182  | 324.2127  |
| 1688.8378 | 844.9225  | 16 | N 5   | 590.3967  | 295.7020  |
| 1785.8905 | 893.4489  | 17 | P 4   | 476.3538  | 238.6805  |
| 1898.9746 | 949.9109  | 18 | L 3   | 379.3010  | 190.1542  |
| 2012.0587 | 1006.5330 | 19 | L 2   | 266.2176  | 133.6121  |
|           |           | 20 | K 1   | 153.1329  | 77.0701   |

[Click] to move table

Static Modifications:

C: 57.0215

Variable Modifications:

K: 6.0201



| Protein Probab. | Protein     | Tot. Peptides | Unique Peptides | Best Gene Name | Scan # | Charge | Delta Mass | Peptide Prophet Score | Peptide Sequence       |
|-----------------|-------------|---------------|-----------------|----------------|--------|--------|------------|-----------------------|------------------------|
| 0,9865          | IP100328978 | 1             | 1               | CTSW           | 3741   | 2+     | -0,0213    | 0,9999                | K.VAWIQDFIM" LQNNEHR.I |

**Peptide Details**

SHOW MODIFICATIONS -

|                 |                      |                                                                                          |
|-----------------|----------------------|------------------------------------------------------------------------------------------|
| Scan: 3741      | Delta Mass: -0.0213  | Protein: IP100328978                                                                     |
| Mass: 2029.9910 | Next: 254.000        | Fraction: VF_T13h_band05.mzXML                                                           |
| Hyper: 489.000  | PeptideProphet: 1.00 | Run: VF_T13h_band05.pep.xml (Vfor/VF_T13h_band05 [VF_SILAC_AssmtWindow_NewPt_4da_Human]) |
| Protein Hits: 1 | Ion Percent: 80%     |                                                                                          |
| Charge: 2+      | B: 1.000             |                                                                                          |

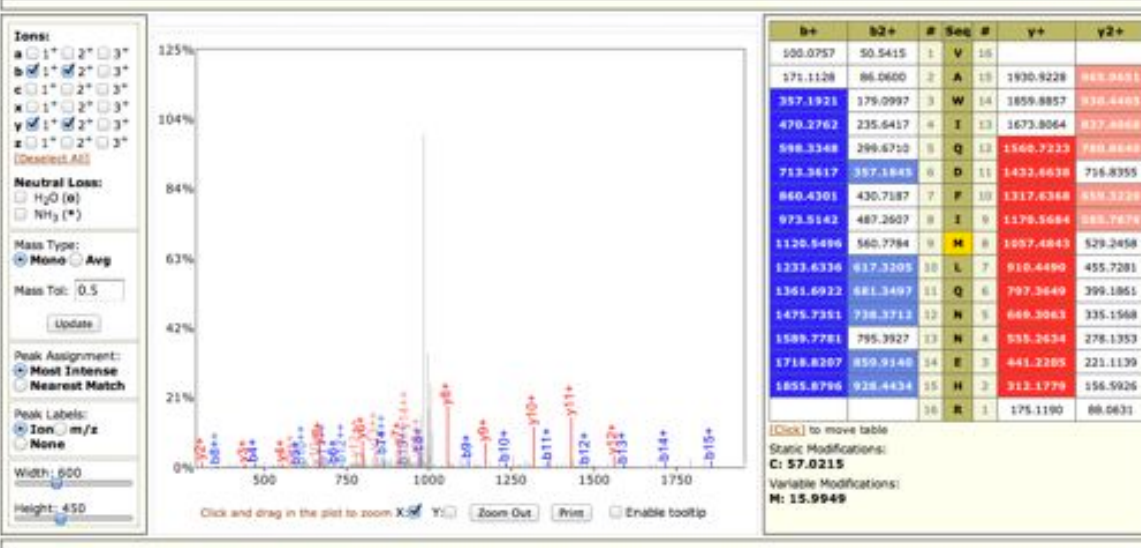

| Protein Probab. | Protein                                                                                     | Tot. Peptides | Unique Peptides | Best Gene Name                                               | Scan # | Charge | Delta Mass | Peptide Prophet Score | Peptide Sequence  |
|-----------------|---------------------------------------------------------------------------------------------|---------------|-----------------|--------------------------------------------------------------|--------|--------|------------|-----------------------|-------------------|
| 0,9849          | IPI00719814,<br>IPI00456013,<br>IPI00219291,<br>IPI00873259,<br>IPI00220300,<br>IPI00171925 | 1             | 1               | ATP5J2,<br>ATP5J2,<br>ATP5J2,<br>ATP5J2,<br>ATP5J2,<br>PTCD1 | 3745   | 2+     | -0,0161    | 0,9996                | R.DFSPSGIFGAFQR.G |

### Peptide Details

#### SHOW MODIFICATIONS

|              |           |                 |         |          |                                                                                      |
|--------------|-----------|-----------------|---------|----------|--------------------------------------------------------------------------------------|
| Scan         | 3745      | Delta Mass      | -0.0161 | Protein  | IPI00171925                                                                          |
| Mass         | 1420.6910 | Next            | 282.000 | Fraction | VF_T13h_band06.mzXML                                                                 |
| Hyper        | 493.000   | Peptide/Prophet | 1.00    | Run      | VF_T13h_band06-pep.xml [Vitor/VF_T13h_band06 [VF_SILAC_AssmtWindow_NewPL_4da_Human]] |
| Protein Hits | 6         | Ion Percent     | 88%     |          |                                                                                      |
| Charge       | 2+        | B               | 1.000   |          |                                                                                      |

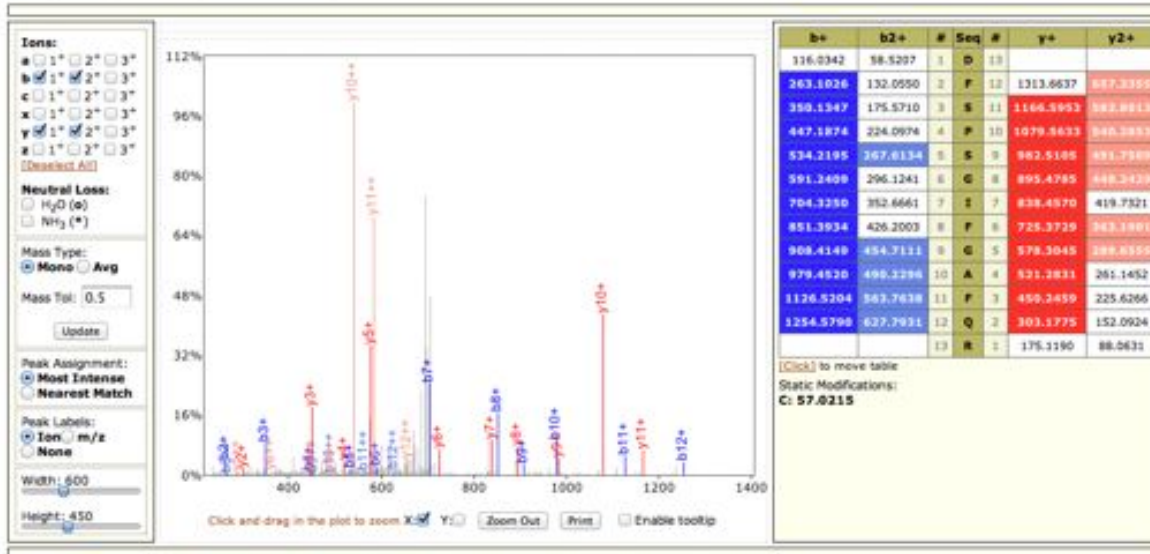

| Protein Probab. | Protein                                                                                     | Tot. Peptides | Unique Peptides | Best Gene Name                                               | Scan # | Charge | Delta Mass | Peptide Prophet Score | Peptide Sequence  |
|-----------------|---------------------------------------------------------------------------------------------|---------------|-----------------|--------------------------------------------------------------|--------|--------|------------|-----------------------|-------------------|
| 0,9456          | IPI00719814,<br>IPI00456013,<br>IPI00219291,<br>IPI00873259,<br>IPI00220300,<br>IPI00171925 | 1             | 1               | ATP5J2,<br>ATP5J2,<br>ATP5J2,<br>ATP5J2,<br>ATP5J2,<br>PTCD1 | 3751   | 2+     | -0,0149    | 0,9964                | R.DFSPSGIFGAFQR.G |

Peptide Details

SHOW MODIFICATIONS

|              |           |                 |         |          |                                               |
|--------------|-----------|-----------------|---------|----------|-----------------------------------------------|
| Scan         | 3751      | Delta Mass      | -0.0149 | Protein  | IPI00171925                                   |
| Mass         | 1428.6910 | Next            | 252.000 | Fraction | VF_T13h_band05.mzXML                          |
| Hyper        | 366.000   | Peptide/Prophet | 1.00    | Run      | VF_T13h_band05.pep.xml (Vitor/VF_T13h_band05) |
| Protein Hits | 6         | Ion Percent     | 71%     |          | (VF_SQLAC_AssimWindow_NewR_Ada_Human)         |
| Charge       | 2+        | B               | 1.000   |          |                                               |

**Ions:**

a  1\*  2\*  3\*

b  1\*  2\*  3\*

c  1\*  2\*  3\*

x  1\*  2\*  3\*

y  1\*  2\*  3\*

z  1\*  2\*  3\*

(Deselect All)

**Neutral Loss:**

H<sub>2</sub>O (0)

NH<sub>3</sub> (\*)

**Mass Type:**

None  Avg

Mass Tol: 0.5

Update

**Peak Assignment:**

Most Intense  Nearest Match

**Peak Labels:**

Ion m/z  None

Width: 600

Height: 450

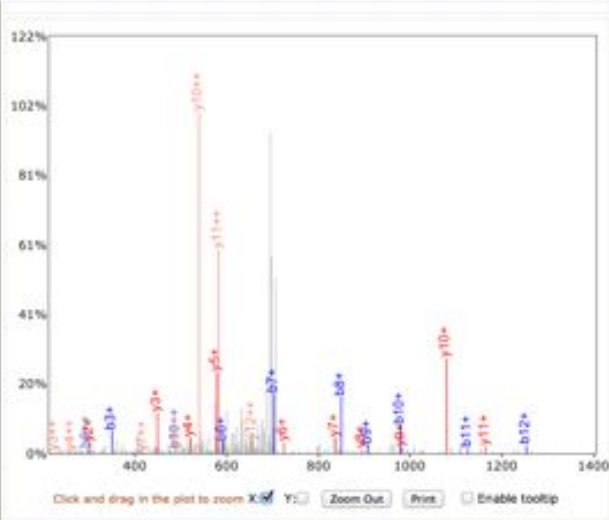

| b+        | b2+      | #  | Seq # | y+        | y2+      |
|-----------|----------|----|-------|-----------|----------|
| 116.0342  | 58.5207  | 1  | D 13  |           |          |
| 263.1026  | 132.0550 | 2  | F 13  | 1313.6637 | 897.1185 |
| 380.1347  | 175.5710 | 3  | S 11  | 1144.9997 | 383.8813 |
| 447.1874  | 224.0974 | 4  | P 10  | 1079.5623 | 540.2853 |
| 534.2195  | 267.6134 | 5  | S 9   | 983.5105  | 461.7599 |
| 591.2489  | 294.1241 | 6  | C 8   | 895.4785  | 448.2429 |
| 704.3250  | 352.6661 | 7  | T 7   | 838.4578  | 419.7221 |
| 851.3934  | 426.2003 | 8  | F 6   | 725.3729  | 363.1901 |
| 908.4149  | 454.7111 | 9  | G 5   | 578.3045  | 289.6559 |
| 979.4520  | 496.2298 | 10 | A 4   | 521.2631  | 261.1452 |
| 1126.5204 | 563.7638 | 11 | F 3   | 450.2459  | 235.6346 |
| 1264.5798 | 627.7931 | 12 | Q 2   | 383.1778  | 152.0924 |
|           |          | 13 | R 1   | 175.1190  | 88.0631  |

Static Modifications:  
C: 57.0215

| Protein Probab. | Protein                                                                                     | Tot. Peptides | Unique Peptides | Best Gene Name                                                   | Scan # | Charge | Delta Mass | Peptide Prophet Score | Peptide Sequence     |
|-----------------|---------------------------------------------------------------------------------------------|---------------|-----------------|------------------------------------------------------------------|--------|--------|------------|-----------------------|----------------------|
| 0,9837          | IPI00647001,<br>IPI00759824,<br>IPI00449263,<br>IPI00760940,<br>IPI00025849,<br>IPI00007423 | 1             | 1               | ANP32B,<br>ANP32B,<br>ANP32A,<br>LOC723972,<br>ANP32A,<br>ANP32B | 3763   | 2+     | -0,0235    | 0,9999                | K.SLDLNFCEVTNLNDYR.E |

### Peptide Details

#### SHOW MODIFICATIONS :

|              |           |                |         |          |                                                                                         |
|--------------|-----------|----------------|---------|----------|-----------------------------------------------------------------------------------------|
| Scan         | 3763      | Delta Mass     | -0.0235 | Protein  | IPI00007423                                                                             |
| Mass         | 1972.9070 | Next           | 316.000 | Fraction | vF_T13h_band04.mzXML                                                                    |
| Hyper        | 587.000   | PeptideProphet | 1.00    | Run      | vF_T13h_band04.pep.xml (Vitor/vF_T13h_band04<br>(vF_SILAC_AssmtWindow_NewPl_4ds_Human)) |
| Protein Hits | 6         | Ion Percent    | 80%     |          |                                                                                         |
| Charge       | 2+        | B              | 1.000   |          |                                                                                         |

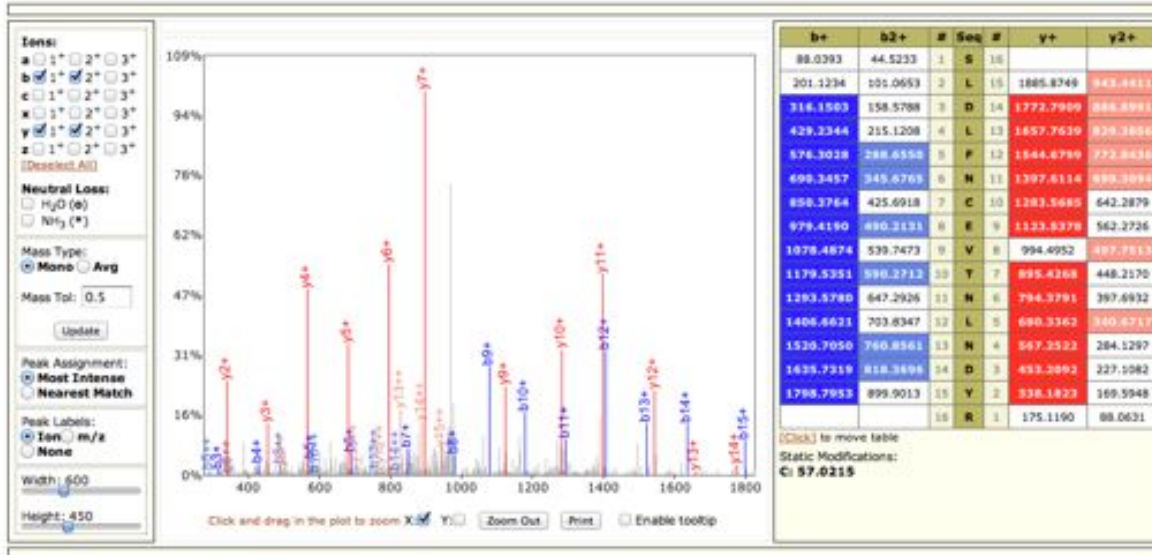

| Protein Probab. | Protein                                                                     | Tot. Peptides | Unique Peptides | Best Gene Name                                | Scan # | Charge | Delta Mass | Peptide Prophet Score | Peptide Sequence    |
|-----------------|-----------------------------------------------------------------------------|---------------|-----------------|-----------------------------------------------|--------|--------|------------|-----------------------|---------------------|
| 0,9695          | IPI00791194,<br>IPI00789063,<br>IPI00789999,<br>IPI00789792,<br>IPI00220503 | 1             | 1               | DCTN2,<br>DCTN2,<br>DCTN2,<br>DCTN2,<br>DCTN2 | 3774   | 2+     | -0,0154    | 0,9984                | K.VSALDLAVLDQVEAR.L |

### Peptide Details

#### SHOW MODIFICATIONS -

|              |           |                 |         |          |                                                                                      |
|--------------|-----------|-----------------|---------|----------|--------------------------------------------------------------------------------------|
| Scan         | 1598.8750 | Delta Mass      | -0.0154 | Protein  | IPI00220503                                                                          |
| Hyper        | 389.000   | Next            | 246.000 | Fraction | VF_T13h_band03.mzXML                                                                 |
| Protein Hits | 5         | Peptide Prophet | 1.00    | Run      | VF_T13h_band03.pep.xml (Vitor/VF_T13h_band03 (VF_SILAC_AssayWindow_NewPL_4da_Human)) |
| Charge       | 2+        | Ion Percent     | 68%     |          |                                                                                      |
|              |           | B               | 1.000   |          |                                                                                      |

#### Ions:

- 1<sup>+</sup>  2<sup>+</sup>  3<sup>+</sup>

[\[Delect All\]](#)

- #### Neutral Loss:
- H<sub>2</sub>O (a)
  - NH<sub>3</sub> (\*)

- #### Mass Type:
- Mono
  - Avg

Mass Tol: 0.5

[Update](#)

#### Peak Assignment:

- Most Intense
- Nearest Match

- #### Peak Labels:
- Ion
  - m/z
  - None

Width: 500

Height: 450

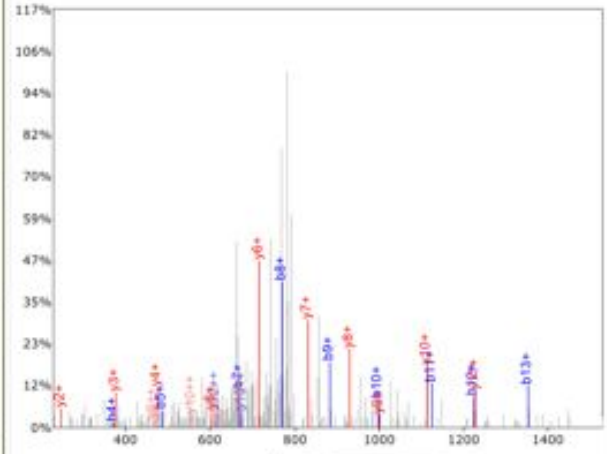

Click and drag in the plot to zoom X:  Y:  [Zoom Out](#) [Print](#)  Enable tooltip

| b+        | b2+      | #  | Seq | #  | y+        | y2+      |
|-----------|----------|----|-----|----|-----------|----------|
| 100.0757  | 50.5415  | 1  | V   | 15 |           |          |
| 187.0277  | 94.0575  | 2  | S   | 14 | 1499.8064 | 750.4068 |
| 258.1448  | 129.5761 | 3  | A   | 13 | 1412.7744 | 706.8908 |
| 371.3289  | 186.1181 | 4  | L   | 12 | 1341.7373 | 671.3733 |
| 486.3538  | 243.6316 | 5  | D   | 11 | 1238.6933 | 614.3303 |
| 599.3399  | 300.1736 | 6  | L   | 10 | 1133.6262 | 587.3168 |
| 670.3770  | 335.6921 | 7  | A   | 9  | 1080.5423 | 500.7747 |
| 769.4454  | 385.2264 | 8  | V   | 8  | 929.5051  | 461.3842 |
| 882.5295  | 441.7684 | 9  | L   | 7  | 830.4367  | 415.7220 |
| 997.5564  | 499.2819 | 10 | D   | 6  | 717.3526  | 359.1799 |
| 1119.6150 | 563.3111 | 11 | Q   | 5  | 602.3257  | 301.6665 |
| 1224.6834 | 613.8454 | 12 | V   | 4  | 474.2671  | 237.6372 |
| 1353.7260 | 677.3666 | 13 | E   | 3  | 375.1987  | 188.1030 |
| 1424.7631 | 712.8852 | 14 | A   | 2  | 244.1961  | 123.5817 |
|           |          | 15 | R   | 1  | 175.1190  | 88.0631  |

[\[Click\]](#) to move table

Static Modifications:  
C: 57.0215

| Protein Probab. | Protein     | Tot. Peptides | Unique Peptides | Best Gene Name | Scan # | Charge | Delta Mass | Peptide Prophet Score | Peptide Sequence     |
|-----------------|-------------|---------------|-----------------|----------------|--------|--------|------------|-----------------------|----------------------|
| 0,9837          | IPI00334282 | 1             | 1               | FAM3C          | 3777   | 2+     | -0,0241    | 0,9999                | R.LIADLGSTSITNLGFR.D |

### Peptide Details

#### SHOW MODIFICATIONS

|              |           |                 |         |          |                                                                                      |
|--------------|-----------|-----------------|---------|----------|--------------------------------------------------------------------------------------|
| Scan         | 3777      | Delta Mass      | -0.0241 | Protein  | IPI00334282                                                                          |
| Mass         | 1677.9170 | Next            | 281.000 | Fraction | VF_T13h_band04.mpxml                                                                 |
| Hydr         | 594.000   | Peptide/Prophet | 1.00    | Run      | VF_T13h_band04 pep.xml (Vitor/VF_T13h_band04 (VF_SILAC_AssayWindow_NewPL_4da_Human)) |
| Protein Hits | 1         | Ion Percent     | 87%     |          |                                                                                      |
| Charge       | 2+        | B               | 1.000   |          |                                                                                      |

#### Ions:

- 1<sup>+</sup>  2<sup>+</sup>  3<sup>+</sup>  
 1<sup>+</sup>  2<sup>+</sup>  3<sup>+</sup>

(Deselect All)

#### Neutral Loss:

- H<sub>2</sub>O (a)  
 NH<sub>3</sub> (\*)

#### Mass Type:

- Mono  Avg

Mass Tol: 0.5

#### Peak Assignment:

- Most Intense  Nearest Match

#### Peak Labels:

- Ion  m/z  None

Width: 600

Height: 450

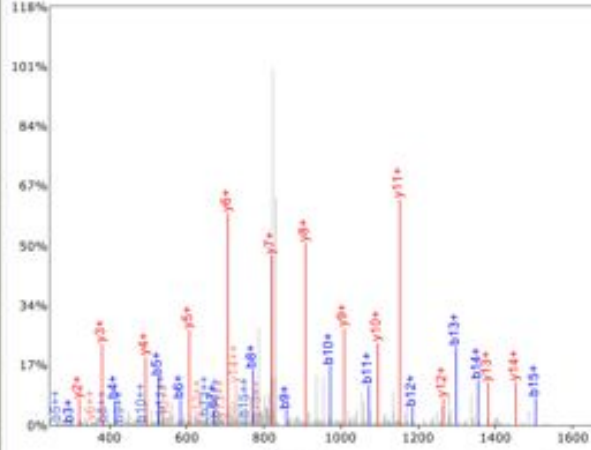

Click and drag in the plot to zoom X: Y:    Enable tooltip

| b+        | b2+      | #  | Seq # | y+        | y2+      |
|-----------|----------|----|-------|-----------|----------|
| 114.0913  | 57.5493  | 1  | L 16  |           |          |
| 227.1754  | 114.0913 | 2  | I 15  | 1564.8329 | 783.9301 |
| 298.3119  | 149.6099 | 3  | A 14  | 1481.7489 | 739.3791 |
| 413.2399  | 207.1234 | 4  | D 13  | 1380.7118 | 688.8393 |
| 526.3239  | 263.6654 | 5  | L 12  | 1265.6848 | 633.3481 |
| 583.3450  | 292.1761 | 6  | G 11  | 1152.6068 | 576.8040 |
| 670.3770  | 335.6921 | 7  | S 10  | 1095.6783 | 548.2933 |
| 771.4247  | 386.2166 | 8  | T 9   | 1008.5473 | 504.7773 |
| 858.4567  | 429.7330 | 9  | S 8   | 907.4996  | 454.2534 |
| 971.5408  | 486.2740 | 10 | I 7   | 828.4676  | 410.7374 |
| 1072.5885 | 536.7979 | 11 | T 6   | 707.3830  | 354.1934 |
| 1184.6314 | 593.8193 | 12 | N 5   | 694.3358  | 303.6715 |
| 1299.7155 | 650.3614 | 13 | L 4   | 492.3920  | 246.6501 |
| 1354.7989 | 678.8721 | 14 | G 3   | 379.2088  | 190.1081 |
| 1503.8053 | 752.4063 | 15 | F 2   | 322.1874  | 161.5973 |
|           |          | 16 | R 1   | 176.1190  | 88.0631  |

[Click](#) to move table

Static Modifications:

C: 57.0215

| Protein Probab. | Protein                                                     | Tot. Peptides | Unique Peptides | Best Gene Name                                 | Scan# | Charge | Delta Mass | Peptide Prophet Score | Peptide Sequence |
|-----------------|-------------------------------------------------------------|---------------|-----------------|------------------------------------------------|-------|--------|------------|-----------------------|------------------|
| 0,9776          | IPI00790135,<br>IPI00394737,<br>IPI00873898,<br>IPI00163644 | 1             | 1               | OSBPL8,<br>OSBPL8,<br>OSBPL8,<br>DKFZp686C0249 | 3784  | 2+     | -0,0152    | 0,9997                | K.VVLPTFILEPR.S  |

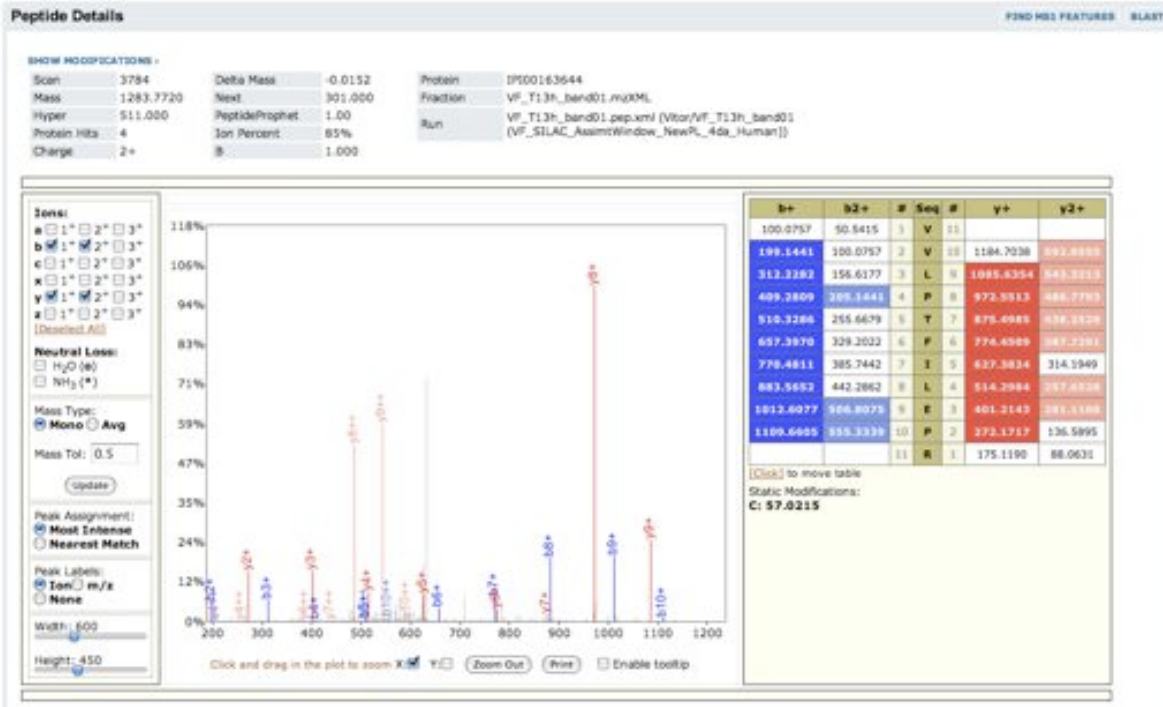

| Protein Probab. | Protein     | Tot. Peptides | Unique Peptides | Best Gene Name | Scan # | Charge | Delta Mass | Peptide Prophet Score | Peptide Sequence    |
|-----------------|-------------|---------------|-----------------|----------------|--------|--------|------------|-----------------------|---------------------|
| 0,9056          | IPI00025257 | 1             | 1               | SEMA7A         | 3785   | 2+     | -0,0156    | 0,9951                | R.LQDVFLLPDPSGQWR.D |

Peptide Details

FIND MS1 FEATURES

SHOW MODIFICATIONS

|              |           |                |         |          |                                                                                      |
|--------------|-----------|----------------|---------|----------|--------------------------------------------------------------------------------------|
| Scan         | 3785      | Delta Mass     | -0.0156 | Protein  | IPI00025257                                                                          |
| Mass         | 1770.9170 | Next           | 327.000 | Fraction | VF_T13h_band01.mzXML                                                                 |
| Hyper        | 433.000   | PeptideProphet | 1.00    | Run      | VF_T13h_band01.pep.xml (Vitor/VF_T13h_band01 [VF_S2LAC_AssmtWindow_NewPL_4da_Human]) |
| Protein Hits | 1         | Ion Percent    | 75%     |          |                                                                                      |
| Charge       | 2+        | B              | 1.000   |          |                                                                                      |

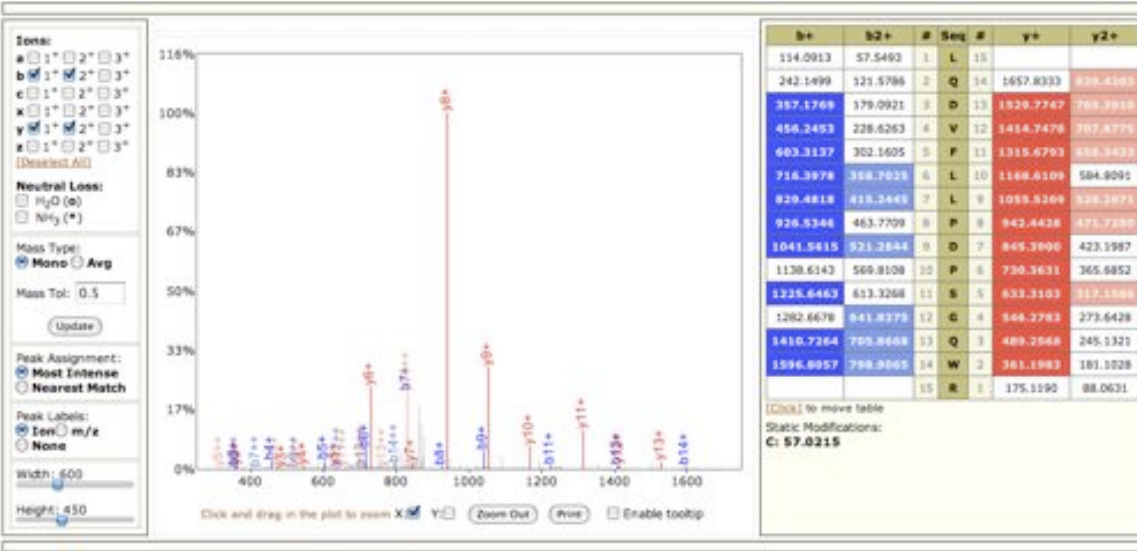



| Protein Probab. | Protein                                     | Tot. Peptides | Unique Peptides | Best Gene Name               | Scan # | Charge | Delta Mass | Peptide Prophet Score | Peptide Sequence   |
|-----------------|---------------------------------------------|---------------|-----------------|------------------------------|--------|--------|------------|-----------------------|--------------------|
| 0,9793          | IPI00789521,<br>IPI00788784,<br>IPI00008167 | 1             | 1               | ATP1B3,<br>ATP1B3,<br>ATP1B3 | 3812   | 2+     | -0,0083    | 0,9996                | K.LFIYNPTTGEFLGR.T |

### Peptide Details

#### SHOW MODIFICATIONS -

|              |           |                |         |          |                                                                                      |
|--------------|-----------|----------------|---------|----------|--------------------------------------------------------------------------------------|
| Scan         | 3812      | Delta Mass     | -0.0083 | Protein  | IPI00008167                                                                          |
| Mass         | 1627.8479 | Resid          | 371.000 | Fraction | VF_T13h_band04.mzXML                                                                 |
| Hyper        | 554.000   | PeptideProphet | 1.00    | Run      | VF_T13h_band04_dep.xml (Vitor/VF_T13h_band04 [VF_SILAC_AssmtWindow_NewPL_4da_Human]) |
| Protein Hits | 3         | Ion Percent    | 88%     |          |                                                                                      |
| Charge       | 2+        | B              | 1.000   |          |                                                                                      |

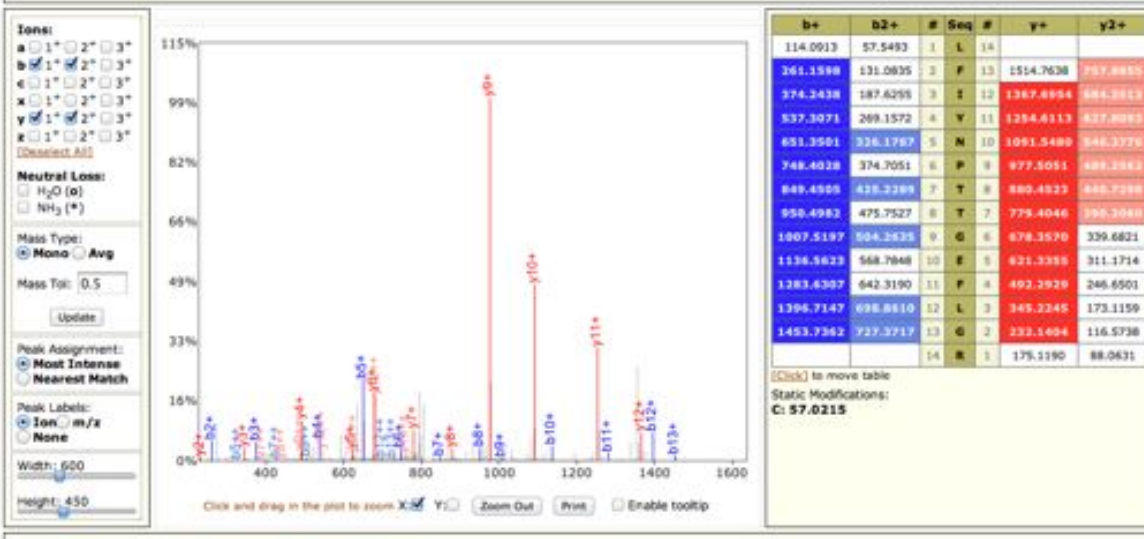

| b+        | b2+      | #  | Seq # | y+        | y2+      |
|-----------|----------|----|-------|-----------|----------|
| 114.0913  | 57.5483  | 1  | L 14  |           |          |
| 265.1588  | 131.0835 | 3  | F 13  | 1514.7638 | 757.8815 |
| 374.2438  | 187.6255 | 3  | I 12  | 1387.6954 | 684.3813 |
| 537.3071  | 269.1572 | 4  | Y 11  | 1254.6113 | 627.8982 |
| 691.3501  | 336.1787 | 5  | N 10  | 1091.5489 | 546.3776 |
| 748.4028  | 374.7051 | 6  | P 9   | 977.5051  | 489.2862 |
| 849.4505  | 428.2389 | 7  | T 8   | 880.4823  | 445.7298 |
| 950.4982  | 475.7527 | 8  | T 7   | 778.4046  | 395.2080 |
| 1007.5197 | 504.2635 | 9  | G 6   | 676.3570  | 339.6821 |
| 1136.5623 | 568.7848 | 10 | E 5   | 621.3395  | 311.1714 |
| 1283.6307 | 642.3190 | 11 | F 4   | 492.2920  | 246.6501 |
| 1396.7147 | 698.8610 | 12 | L 3   | 345.2245  | 173.1159 |
| 1453.7961 | 727.3717 | 13 | G 2   | 232.1404  | 116.5738 |
|           |          | 14 | K 1   | 175.1190  | 88.0631  |

Static Modifications:  
C: 57.0215

| Protein Probab. | Protein                                     | Tot. Peptides | Unique Peptides | Best Gene Name            | Scan # | Charge | Delta Mass | Peptide Prophet Score | Peptide Sequence  |
|-----------------|---------------------------------------------|---------------|-----------------|---------------------------|--------|--------|------------|-----------------------|-------------------|
| 0,9756          | IPI00647044,<br>IPI00024266,<br>IPI00639812 | 1             | 1               | MGST3,<br>MGST3,<br>MGST3 | 3813   | 2+     | -0,0158    | 0,9990                | R.IASGLGLAWIVGR.V |

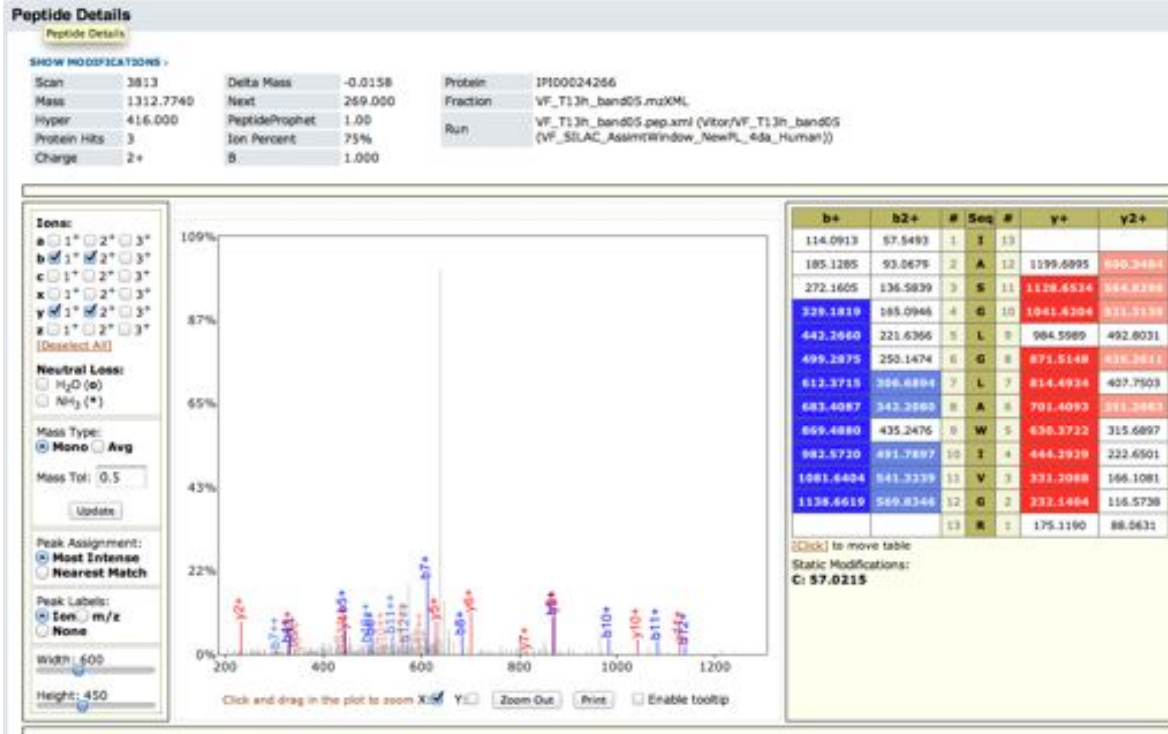

| Protein Probab. | Protein     | Tot. Peptides | Unique Peptides | Best Gene Name | Scan # | Charge | Delta Mass | Peptide Prophet Score | Peptide Sequence    |
|-----------------|-------------|---------------|-----------------|----------------|--------|--------|------------|-----------------------|---------------------|
| 0,9881          | IP100298971 | 1             | 1               | VTN            | 3819   | 2+     | -0,0218    | 0,9999                | R.DVWGIEGPIDAAFTR.I |

### Peptide Details

#### SHOW MODIFICATIONS

|              |           |                |         |          |                                                                                       |
|--------------|-----------|----------------|---------|----------|---------------------------------------------------------------------------------------|
| Scan         | 3819      | Delta Mass     | -0.0218 | Protein  | IP100298971                                                                           |
| Mass         | 1646.8170 | Next           | 371.000 | Fraction | VF_T13h_band06.mzXML                                                                  |
| Hyper        | 715.000   | PeptideProphet | 1.00    | Run      | VF_T13h_band06.pep.xml (Vitar/VF_T13h_band06 (VF_SILAC_AssimtWindow_NewPL_4da_Human)) |
| Protein Hits | 1         | Ion Percent    | 82%     |          |                                                                                       |
| Charge       | 2+        | B              | 1.000   |          |                                                                                       |

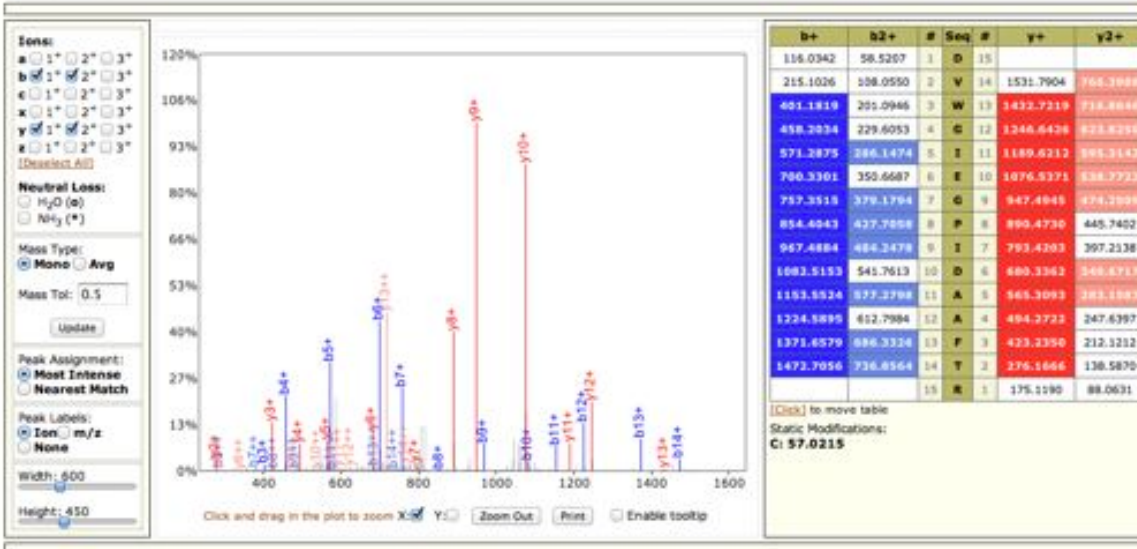

| Protein Probab. | Protein                                     | Tot. Peptides | Unique Peptides | Best Gene Name            | Scan # | Charge | Delta Mass | Peptide Prophet Score | Peptide Sequence        |
|-----------------|---------------------------------------------|---------------|-----------------|---------------------------|--------|--------|------------|-----------------------|-------------------------|
| 0,9827          | IPI00238081,<br>IPI00053288,<br>IPI00171127 | 1             | 1               | UBAP2,<br>UBAP2,<br>UBAP2 | 3821   | 2+     | -0,0173    | 1,000                 | R.LPVDYYGIPFAAPTALASR.D |

Peptide Details

SHOW MODIFICATIONS

|              |           |                |         |          |                                                                                         |
|--------------|-----------|----------------|---------|----------|-----------------------------------------------------------------------------------------|
| Scan         | 3821      | Delta Mass     | -0.0173 | Protein  | IPI00053288                                                                             |
| Mass         | 2022.0650 | Next           | 299.000 | Fraction | VF_T13h_band01.mzXML                                                                    |
| Hyper        | 728.000   | PeptideProphet | 1.00    | Run      | VF_T13h_band01.scp.xml (Vitor/VF_T13h_band01 (VF_SILAC_Assim(Window_NewP..._4da_Human)) |
| Protein Hits | 3         | Ion Percent    | 83%     |          |                                                                                         |
| Charge       | 2+        | B              | 1.000   |          |                                                                                         |

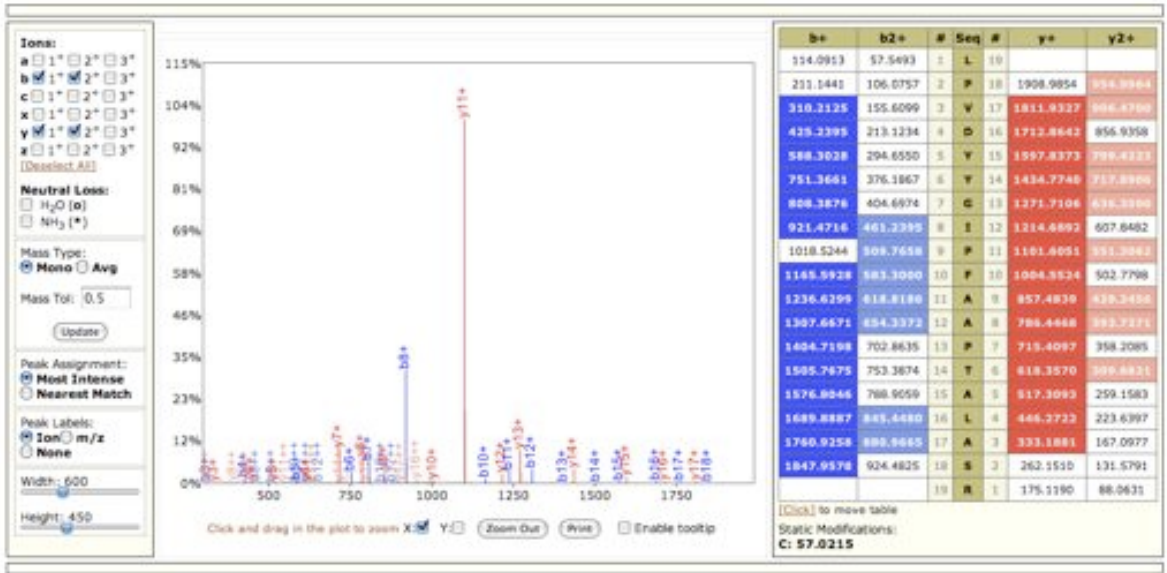

| Protein Probab. | Protein                                     | Tot. Peptides | Unique Peptides | Best Gene Name         | Scan # | Charge | Delta Mass | Peptide Prophet Score | Peptide Sequence   |
|-----------------|---------------------------------------------|---------------|-----------------|------------------------|--------|--------|------------|-----------------------|--------------------|
| 0,9783          | IP100441550,<br>IP100797646,<br>IP100441344 | 1             | 1               | GLB1,<br>GLB1,<br>GLB1 | 3835   | 2+     | -0,0154    | 0,9998                | K.TEAVASSLYDILAR.G |

Peptide Data  
<http://www.yahoo.com/>

SHOW MODIFICATIONS

|              |           |                |         |          |                                                                                        |
|--------------|-----------|----------------|---------|----------|----------------------------------------------------------------------------------------|
| Scan         | 3835      | Delta Mass     | -0.0154 | Protein  | D900441344                                                                             |
| Mass         | 1506.7950 | Next           | 372.000 | Fraction | VF_T13h_band02.mxd                                                                     |
| Hyper        | 576.000   | PeptideProphet | 1.00    | Run      | VF_T13h_band02.pep.xml (Vitor/vf_T13h_band02<br>(VF_SILAC_AssmtWindow_NewP_43a_Human)) |
| Protein Hits | 3         | Ion Percent    | 73%     |          |                                                                                        |
| Charge       | 2+        | S              | 1.000   |          |                                                                                        |

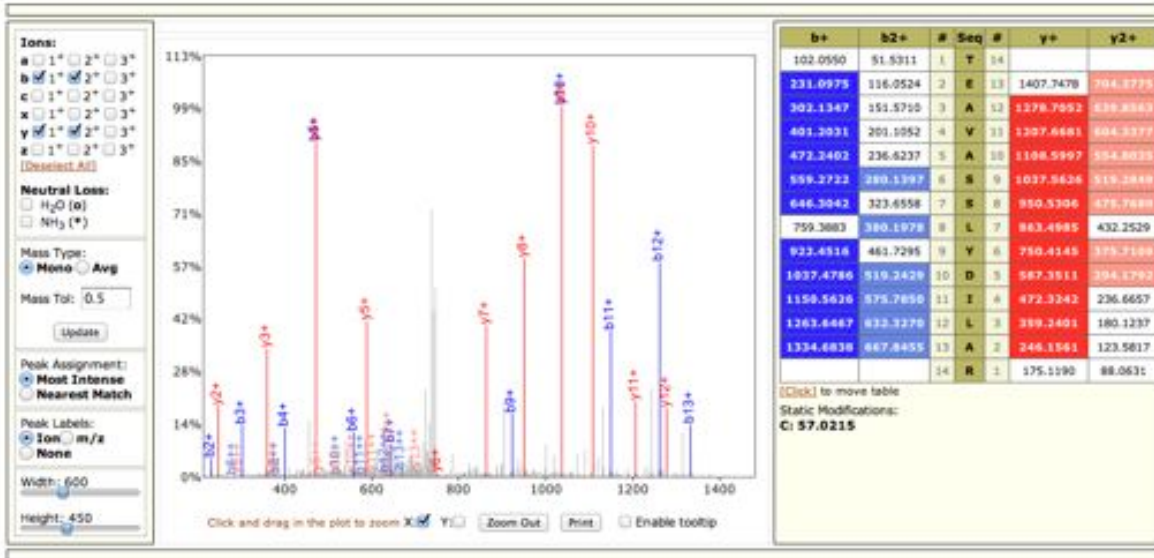

| Protein Probab. | Protein                     | Tot. Peptides | Unique Peptides | Best Gene Name | Scan # | Charge | Delta Mass | Peptide Prophet Score | Peptide Sequence   |
|-----------------|-----------------------------|---------------|-----------------|----------------|--------|--------|------------|-----------------------|--------------------|
| 0,9691          | IP100644989,<br>IP100299571 | 1             | 1               | P5,<br>PDIA6   | 3842   | 2+     | -0,0163    | 0,9981                | R.TGEAIVDAALSALR.Q |

### Peptide Details

#### SHOW MODIFICATIONS -

|              |           |                |         |          |                                                                                      |
|--------------|-----------|----------------|---------|----------|--------------------------------------------------------------------------------------|
| Scan         | 3842      | Delta Mass     | -0.0163 | Protein  | IP100299571                                                                          |
| Mass         | 1386.7590 | Next           | 306.000 | Fraction | VF_T13h_band06.mzXML                                                                 |
| Hyper        | 452.000   | PeptideProphet | 1.00    | Run      | VF_T13h_band06 pep.xml (Vitor/VF_T13h_band06 (VF_SILAC_AssimWindow_NewPt_4da_Human)) |
| Protein Hits | 2         | Ion Percent    | 58%     |          |                                                                                      |
| Charge       | 2+        | B              | 1.000   |          |                                                                                      |

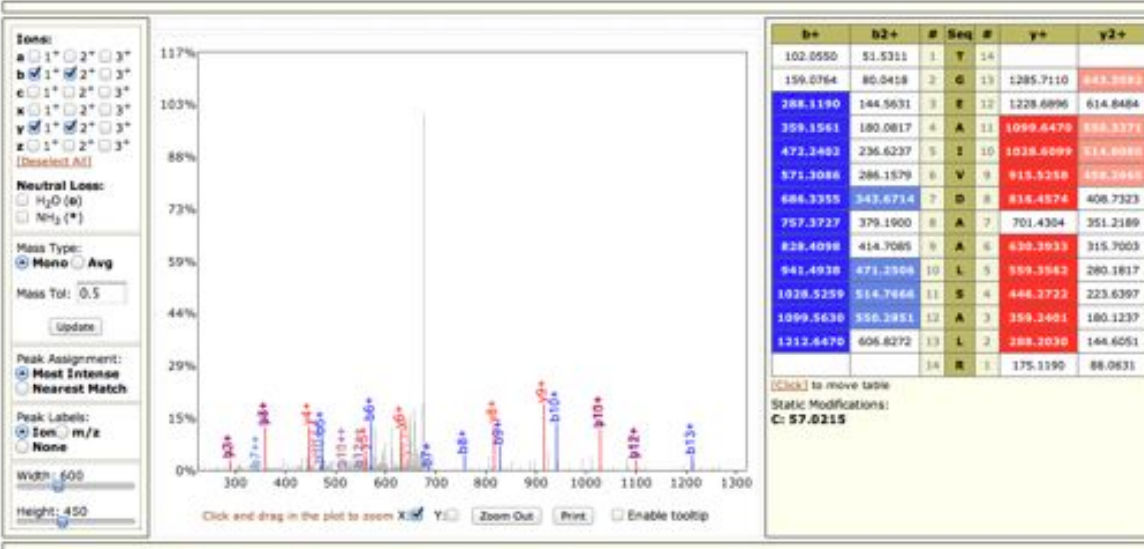

| Protein Probab. | Protein                     | Tot. Peptides | Unique Peptides | Best Gene Name  | Scan # | Charge | Delta Mass | Peptide Prophet Score | Peptide Sequence    |
|-----------------|-----------------------------|---------------|-----------------|-----------------|--------|--------|------------|-----------------------|---------------------|
| 0,9870          | IPI00761107,<br>IPI00026111 | 1             | 1               | TMCO1,<br>TMCO1 | 3845   | 2+     | -0,0179    | 0,9998                | K.LPFTPLSYIQGLSHR.N |

### Peptide Details

#### SHOW MODIFICATIONS -

|              |           |                |         |          |                                                                                    |
|--------------|-----------|----------------|---------|----------|------------------------------------------------------------------------------------|
| Scan         | 3845      | Delta Mass     | -0.0179 | Protein  | IPI00026111                                                                        |
| Mass         | 1728.9430 | Next           | 288.000 | Fraction | VF_T13h_band06.mzXML                                                               |
| Hyper        | 569.000   | PeptideProphet | 1.00    | Run      | VF_T13h_band06.pep.xml (Vitor/VF_T13h_band06_VF_SILAC_AssmtWindow_NewPL_4da_Human) |
| Protein Hits | 2         | Ion Percent    | 89%     |          |                                                                                    |
| Charge       | 2+        | B              | 1.000   |          |                                                                                    |

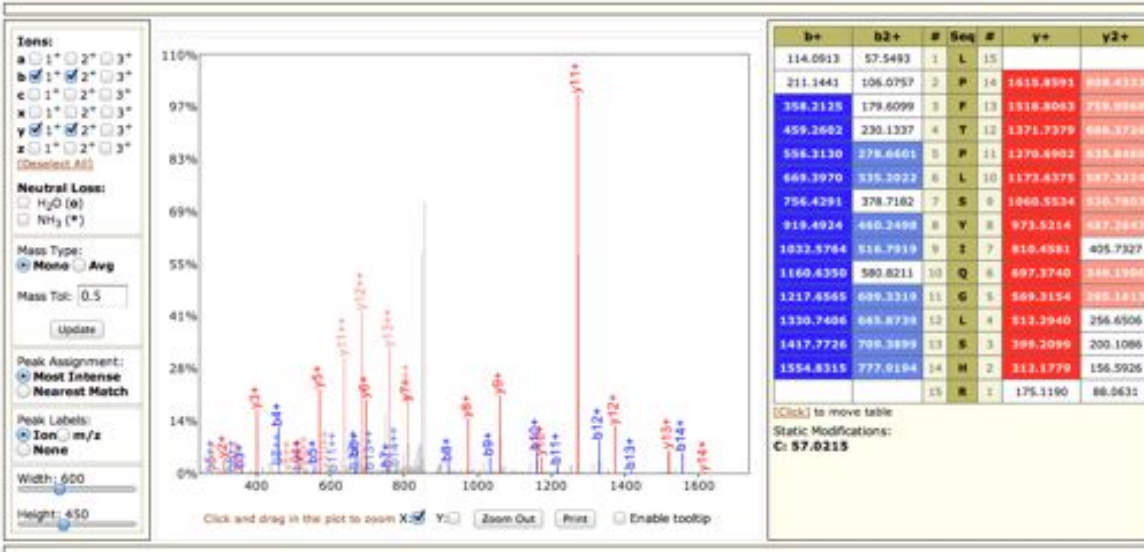

| Protein Probab. | Protein                     | Tot. Peptides | Unique Peptides | Best Gene Name     | Scan # | Charge | Delta Mass | Peptide Prophet Score | Peptide Sequence       |
|-----------------|-----------------------------|---------------|-----------------|--------------------|--------|--------|------------|-----------------------|------------------------|
| 0,9869          | IPI00027378,<br>IPI00396563 | 1             | 1               | SAKS1,<br>LOC51035 | 3855   | 2+     | -0,0241    | 0,9999                | R.GEELGGQDPVQLLSGFPR.R |

### Peptide Details

#### SHOW MODIFICATIONS

|                 |                      |                                                   |
|-----------------|----------------------|---------------------------------------------------|
| Scan: 3855      | Delta Mass: -0.0241  | Protein: IPI00027378                              |
| Mass: 1955.9820 | Next: 239.000        | Fraction: VF_T13h_band03.mzXML                    |
| Hyper: 510.000  | PeptideProphet: 1.00 | Run: VF_T13h_band03.pep.xml (Vfor/VF_T13h_band03) |
| Protein Hits: 2 | Ion Percent: 83%     | (VF_SILAC_AasimfWindow_NewPL_4da_Human)           |
| Charge: 2+      | B: 1.000             |                                                   |

- Ions:**
- 1\*  2\*  3\*
  - 1+  2+  3+
  - 1-  2-  3-
  - 1^  2^  3^
  - 1~  2~  3~
  - 1#  2#  3#
  - 1%  2%  3%
- [Deselect All]

- Neutral Loss:**
- H<sub>2</sub>O (\*)
  - NH<sub>3</sub> (\*)

Mass Type:

- Mono  Avg

Mass Tol: 0.5

[Update]

- Peak Assignment:**
- Most Intense
  - Nearest Match

- Peak Labels:**
- Ion\_m/z
  - None

Width: 600

Height: 450

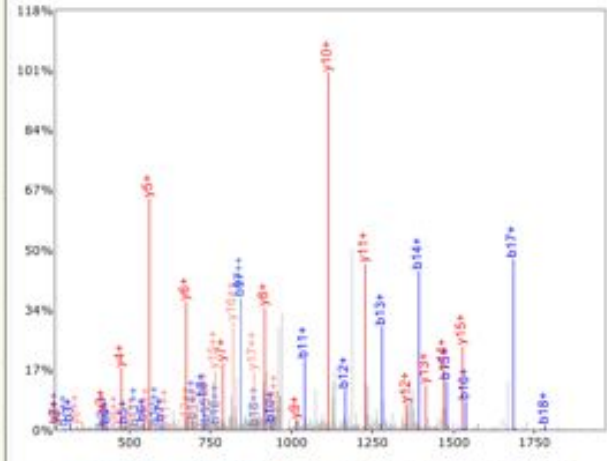

| b+        | b2+      | #  | Seq # | y+ | y2+       |
|-----------|----------|----|-------|----|-----------|
| 58.0287   | 29.5180  | 1  | Q     | 19 |           |
| 187.0713  | 94.0393  | 2  | E     | 18 | 1898.9607 |
| 316.1139  | 158.5606 | 3  | E     | 17 | 1769.9181 |
| 429.1986  | 215.1026 | 4  | L     | 16 | 1640.8755 |
| 486.2195  | 243.6334 | 5  | G     | 15 | 1527.7914 |
| 543.2409  | 272.1241 | 6  | G     | 14 | 1470.7709 |
| 600.2624  | 300.6348 | 7  | G     | 13 | 1413.7485 |
| 738.3216  | 364.6641 | 8  | Q     | 12 | 1356.7279 |
| 843.3479  | 422.1778 | 9  | D     | 11 | 1228.6884 |
| 940.4607  | 470.7040 | 10 | P     | 10 | 1113.6415 |
| 1039.4691 | 520.2382 | 11 | V     | 9  | 1016.5887 |
| 1167.5277 | 584.2678 | 12 | Q     | 8  | 917.6303  |
| 1380.6117 | 640.8095 | 13 | L     | 7  | 789.4617  |
| 1393.6958 | 697.3515 | 14 | L     | 6  | 676.3777  |
| 1480.7276 | 748.8475 | 15 | A     | 5  | 583.2936  |
| 1537.7493 | 769.3783 | 16 | G     | 4  | 476.2616  |
| 1684.8177 | 843.9125 | 17 | F     | 3  | 419.2481  |
| 1781.8765 | 891.4389 | 18 | P     | 2  | 272.1717  |
|           |          | 19 | R     | 1  | 175.1190  |

[Click] to move table  
 Static Modifications:  
**C: 57.0215**





| Protein Probab. | Protein                     | Tot. Peptides | Unique Peptides | Best Gene Name    | Scan # | Charge | Delta Mass | Peptide Prophet Score | Peptide Sequence    |
|-----------------|-----------------------------|---------------|-----------------|-------------------|--------|--------|------------|-----------------------|---------------------|
| 0,9434          | IPI00644131,<br>IPI00012989 | 1             | 1               | MAN2B1,<br>MAN2B1 | 3870   | 2+     | -0,0131    | 0,9976                | K.ELVDYFLNVATAQGR.Y |

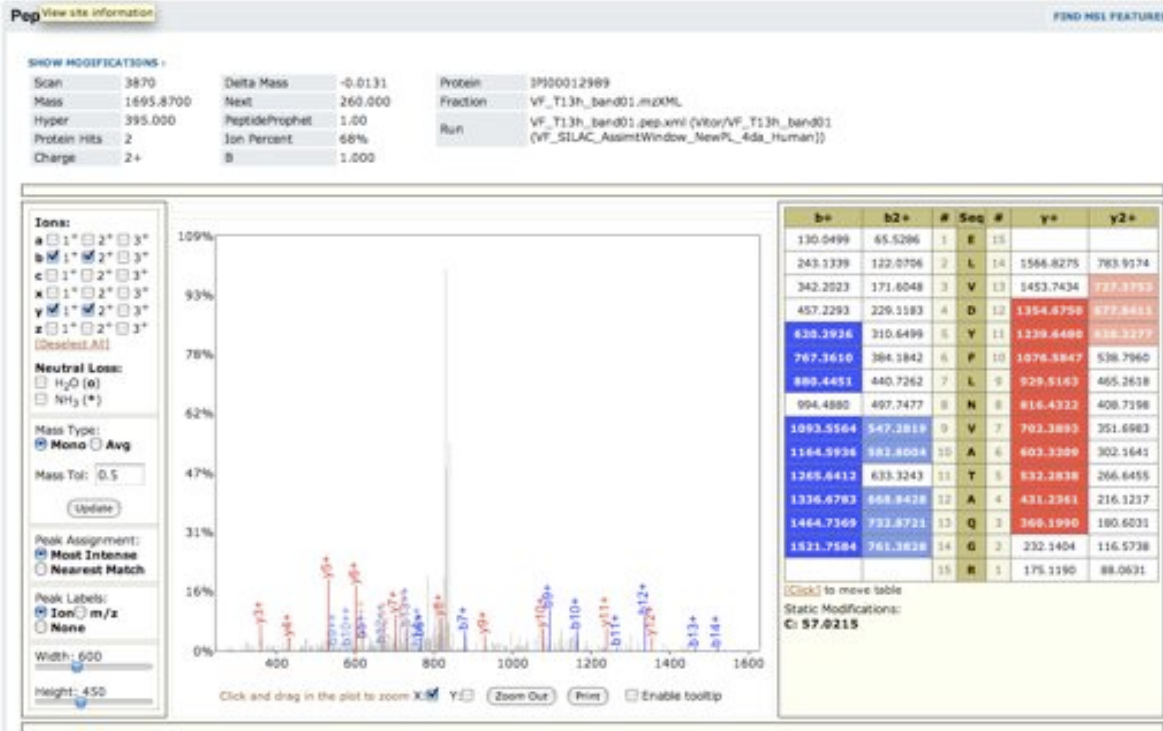

| Protein Probab. | Protein     | Tot. Peptides | Unique Peptides | Best Gene Name | Scan # | Charge | Delta Mass | Peptide Prophet Score | Peptide Sequence           |
|-----------------|-------------|---------------|-----------------|----------------|--------|--------|------------|-----------------------|----------------------------|
| 0,9478          | IPI00032872 | 1             | 1               | MRPS16         | 3885   | 2+     | -0,0243    | 0,9966                | K.LLGLAGFFPLHPM"M"ITNAER.L |

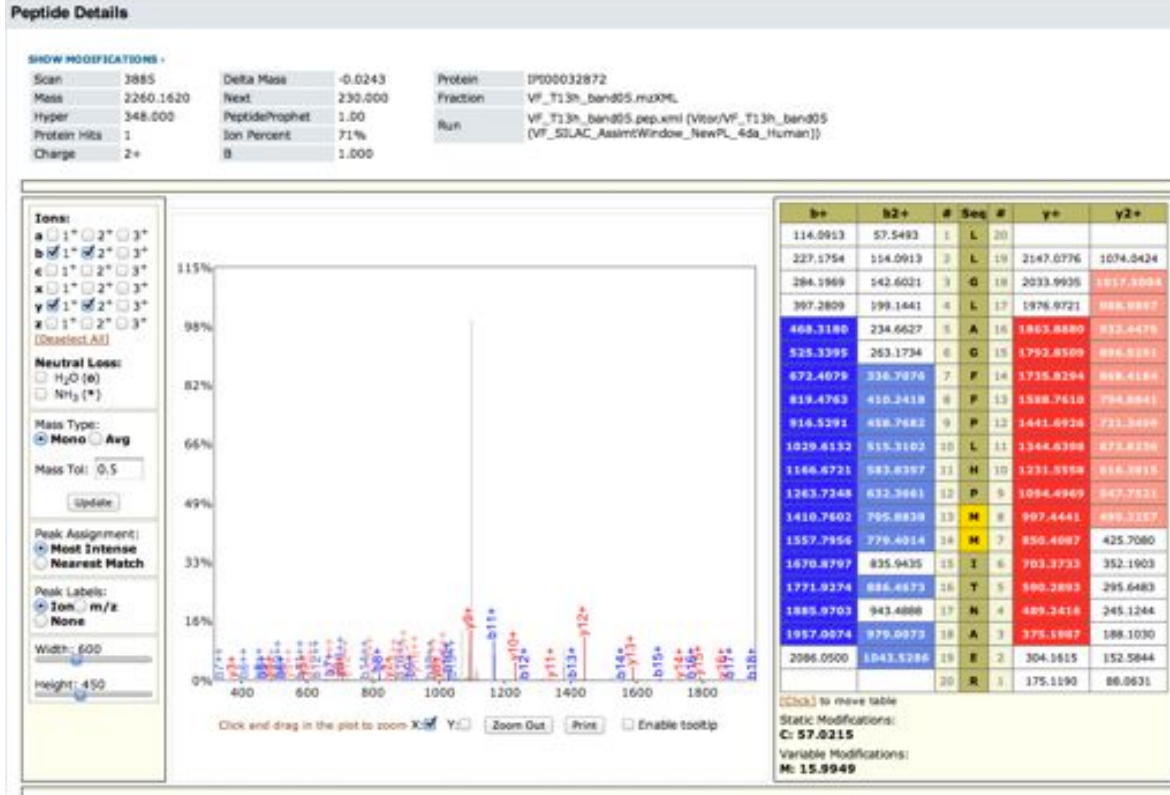

| Protein Probab. | Protein                                     | Tot. Peptides | Unique Peptides | Best Gene Name         | Scan # | Charge | Delta Mass | Peptide Prophet Score | Peptide Sequence      |
|-----------------|---------------------------------------------|---------------|-----------------|------------------------|--------|--------|------------|-----------------------|-----------------------|
| 0,9801          | IPI00387103,<br>IPI00792361,<br>IPI00007247 | 1             | 1               | PCCB,<br>PCCB,<br>PCCB | 3901   | 2+     | -0,0282    | 0,9999                | R.DFFNYLPLSSQDPAPVR.E |

### Peptide Details

#### SHOW MODIFICATIONS

|              |           |                |         |          |                                                                                      |
|--------------|-----------|----------------|---------|----------|--------------------------------------------------------------------------------------|
| Scan         | 3901      | Delta Mass     | -0.0282 | Protein  | IPI00007247                                                                          |
| Mass         | 1965.9710 | Next           | 267.000 | Fraction | VF_T13h_band02.mzXML                                                                 |
| Hyper        | 504.000   | PeptideProphet | 1.00    | Run      | VF_T13h_band02.pep.xml (Vitor/VF_T13h_band02 (VF_SILAC_AssmtWindow_NewPL_4da_Human)) |
| Protein Hits | 3         | Ion Percent    | 78%     |          |                                                                                      |
| Charge       | 2+        | B              | 1.000   |          |                                                                                      |

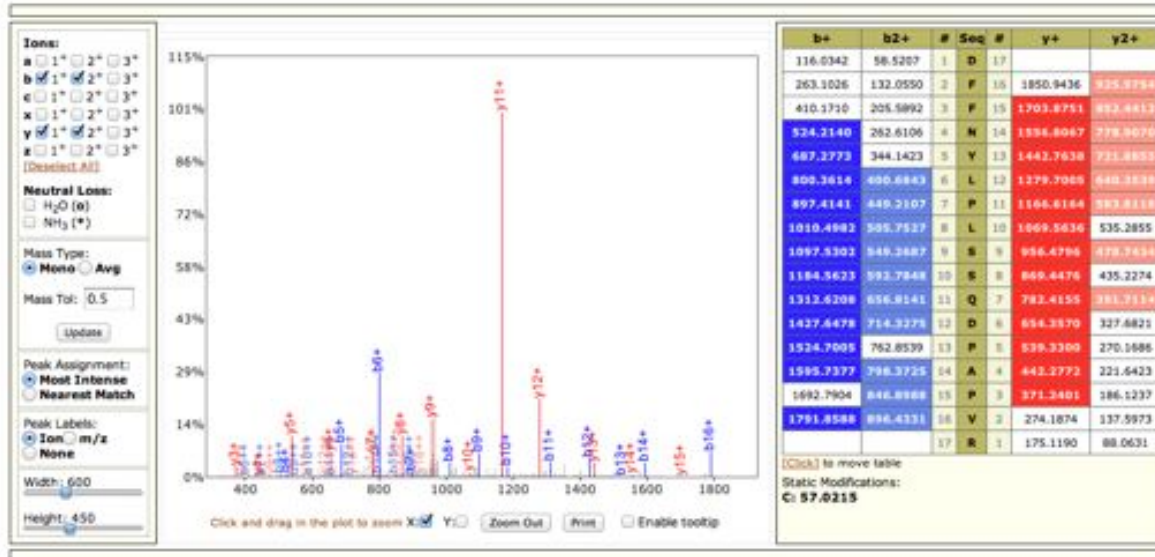

| Protein Probab. | Protein                                     | Tot. Peptides | Unique Peptides | Best Gene Name               | Scan # | Charge | Delta Mass | Peptide Prophet Score | Peptide Sequence         |
|-----------------|---------------------------------------------|---------------|-----------------|------------------------------|--------|--------|------------|-----------------------|--------------------------|
| 0,9627          | IPI00816371,<br>IPI00816523,<br>IPI00016405 | 1             | 1               | OCIAD1,<br>OCIAD1,<br>OCIAD1 | 3904   | 2+     | -0,0208    | 0,9979                | R.SVPLAATSMELITQGLISK'.G |

Peptide Details

SHOW MODIFICATIONS

|              |           |                |         |          |                                                                                         |
|--------------|-----------|----------------|---------|----------|-----------------------------------------------------------------------------------------|
| Scan         | 3904      | Delta Mass     | -0.0208 | Protein  | IPI00016405                                                                             |
| Mass         | 1836.0610 | Next           | 326.000 | Fraction | VF_T13h_band05.mzXML                                                                    |
| Hyper        | 443.000   | PeptideProphet | 1.00    | Run      | VF_T13h_band05.pep.xml (Vitor/VF_T13h_band05<br>(VF_STLAC_AssmtWindow_NewPL_4da_Human)) |
| Protein Hits | 3         | Ion Percent    | 82%     |          |                                                                                         |
| Charge       | 2+        | B              | 1.000   |          |                                                                                         |

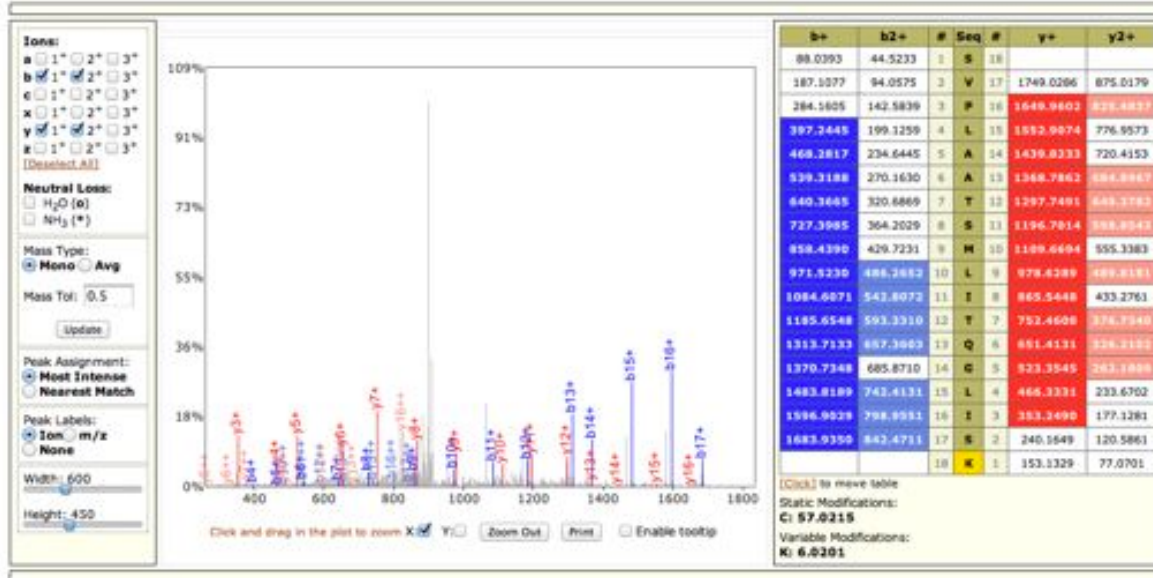

| Protein Probab. | Protein                     | Tot. Peptides | Unique Peptides | Best Gene Name | Scan # | Charge | Delta Mass | Peptide Prophet Score | Peptide Sequence       |
|-----------------|-----------------------------|---------------|-----------------|----------------|--------|--------|------------|-----------------------|------------------------|
| 0,9857          | IPI00640037,<br>IPI00000494 | 1             | 1               | RPL5,<br>RPL5  | 3907   | 2+     | -0,0197    | 0,9998                | K.VGLTNYAAAYCTGLLLAR.R |

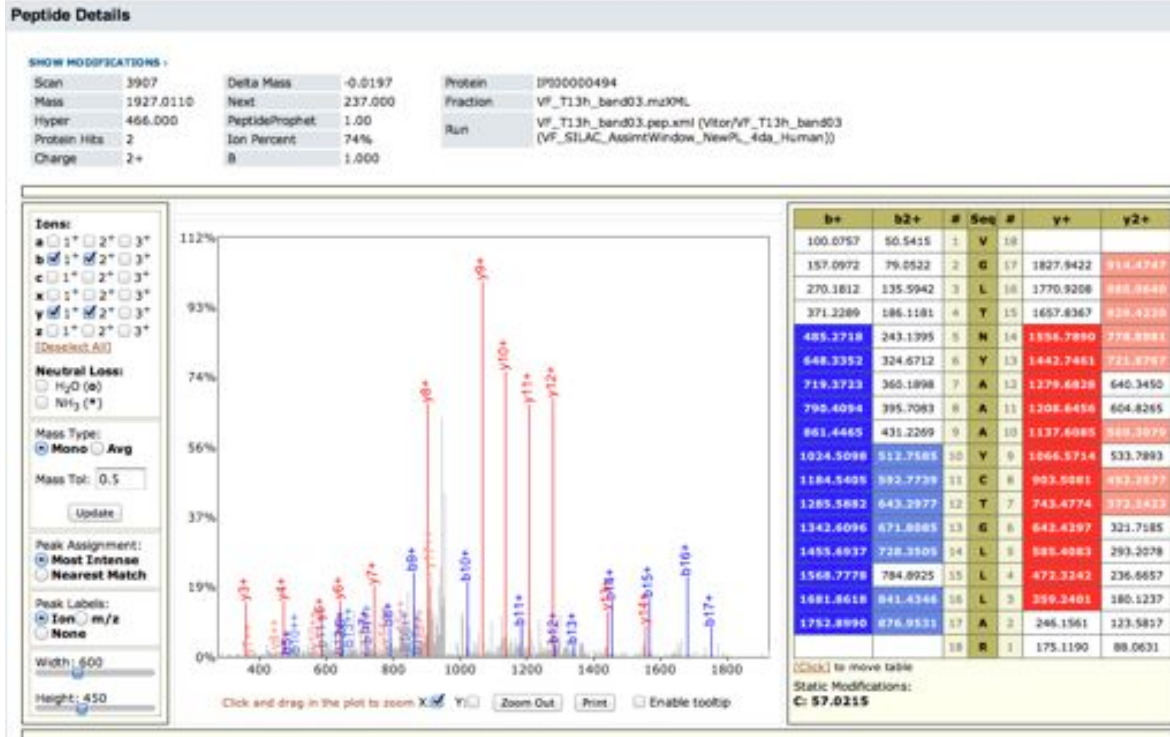



| Protein Probab. | Protein     | Tot. Peptides | Unique Peptides | Best Gene Name | Scan # | Charge | Delta Mass | Peptide Prophet Score | Peptide Sequence          |
|-----------------|-------------|---------------|-----------------|----------------|--------|--------|------------|-----------------------|---------------------------|
| 0,9594          | IP100019502 | 1             | 1               | MYH9           | 3922   | 2+     | -0,0260    | 0,9986                | K.DFSALESQLQDTQELLQEENR.Q |

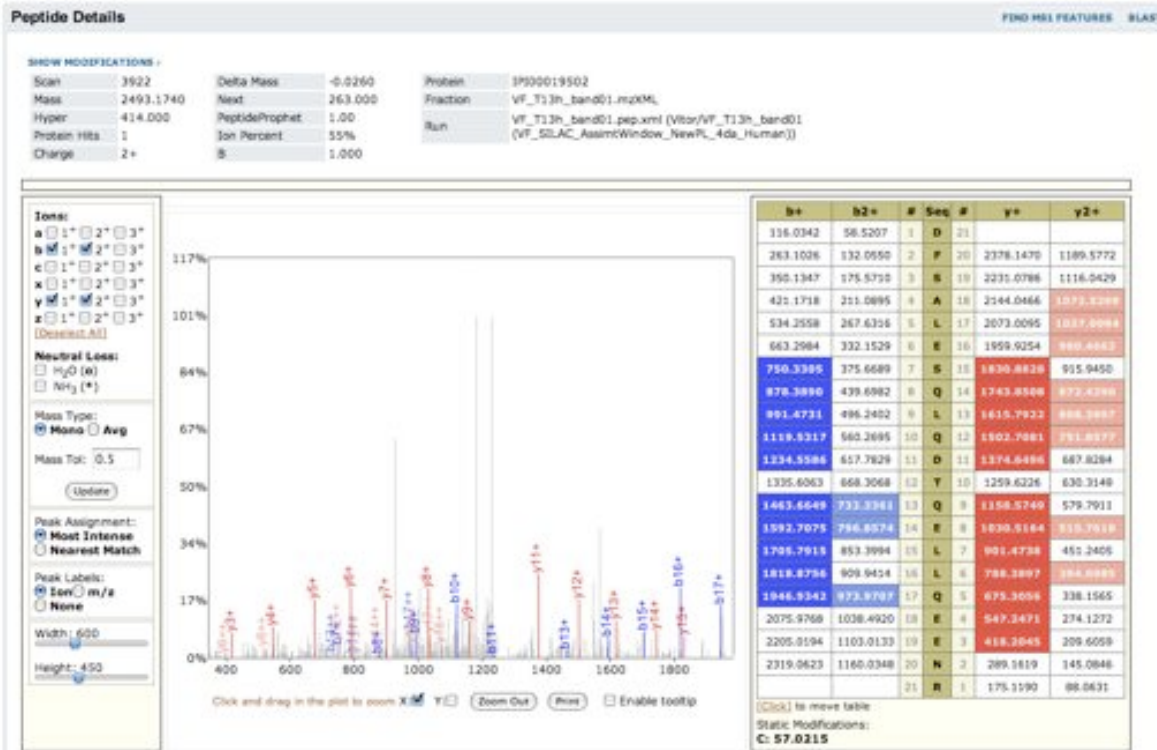



| Protein Probab. | Protein     | Tot. Peptides | Unique Peptides | Best Gene Name | Scan # | Charge | Delta Mass | Peptide Prophet Score | Peptide Sequence            |
|-----------------|-------------|---------------|-----------------|----------------|--------|--------|------------|-----------------------|-----------------------------|
| 0,9877          | IPI00012912 | 1             | 1               | CPT2           | 3938   | 2+     | -0,0287    | 1,000                 | K.YILSDSSPAPEFPLAYLTSEN.R.D |

### Peptide Details

#### SHOW MODIFICATIONS

|              |           |                |         |          |                                                                                      |
|--------------|-----------|----------------|---------|----------|--------------------------------------------------------------------------------------|
| Scan         | 3938      | Delta Mass     | -0.0287 | Protein  | IPI00012912                                                                          |
| Mass         | 2470.2140 | Next           | 273.000 | Fraction | VF_T13h_band05.mz0M                                                                  |
| Hyper        | 712.000   | PeptideProphet | 1.00    | Run      | VF_T13h_band05.pep.xml (Vitor/VF_T13h_band05 (VF_S2LAC_AssmtWindow_NewPL_49a_Human)) |
| Protein Hits | 1         | Ion Percent    | 71%     |          |                                                                                      |
| Charge       | 2+        | B              | 1.000   |          |                                                                                      |

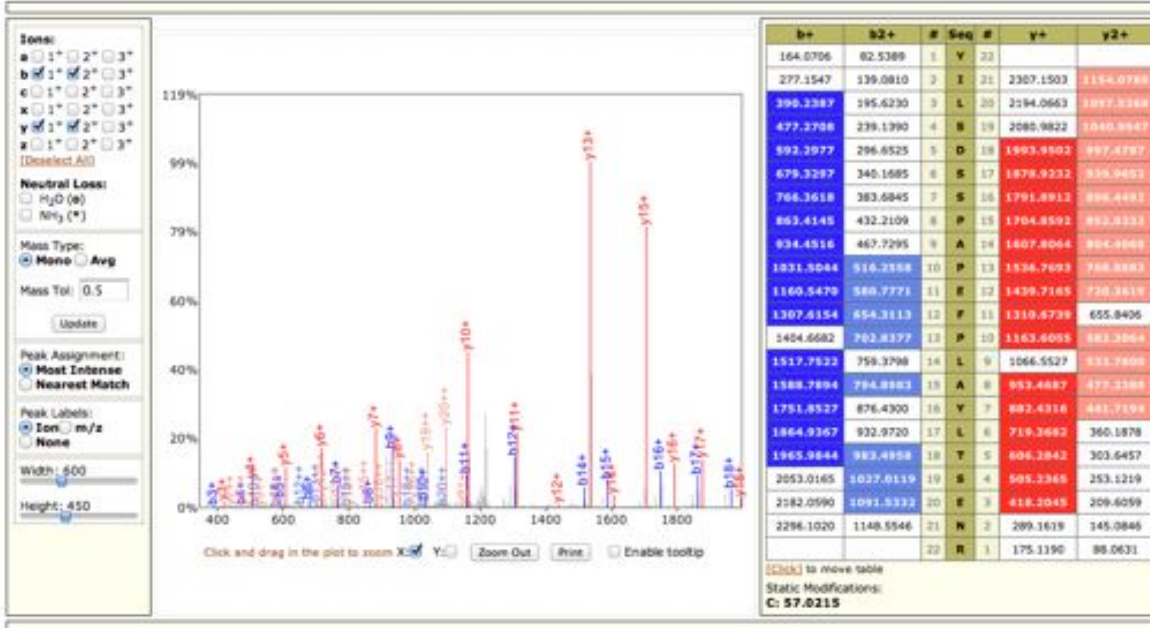

| Protein Probab. | Protein                     | Tot. Peptides | Unique Peptides | Best Gene Name      | Scan # | Charge | Delta Mass | Peptide Prophet Score | Peptide Sequence        |
|-----------------|-----------------------------|---------------|-----------------|---------------------|--------|--------|------------|-----------------------|-------------------------|
| 0,9798          | IPI00873926,<br>IPI00783872 | 1             | 1               | CAPRIN1,<br>CAPRIN1 | 3956   | 2+     | -0,0041    | 0,9993                | R.LNEQYEHASIHLDLLEGGK'E |

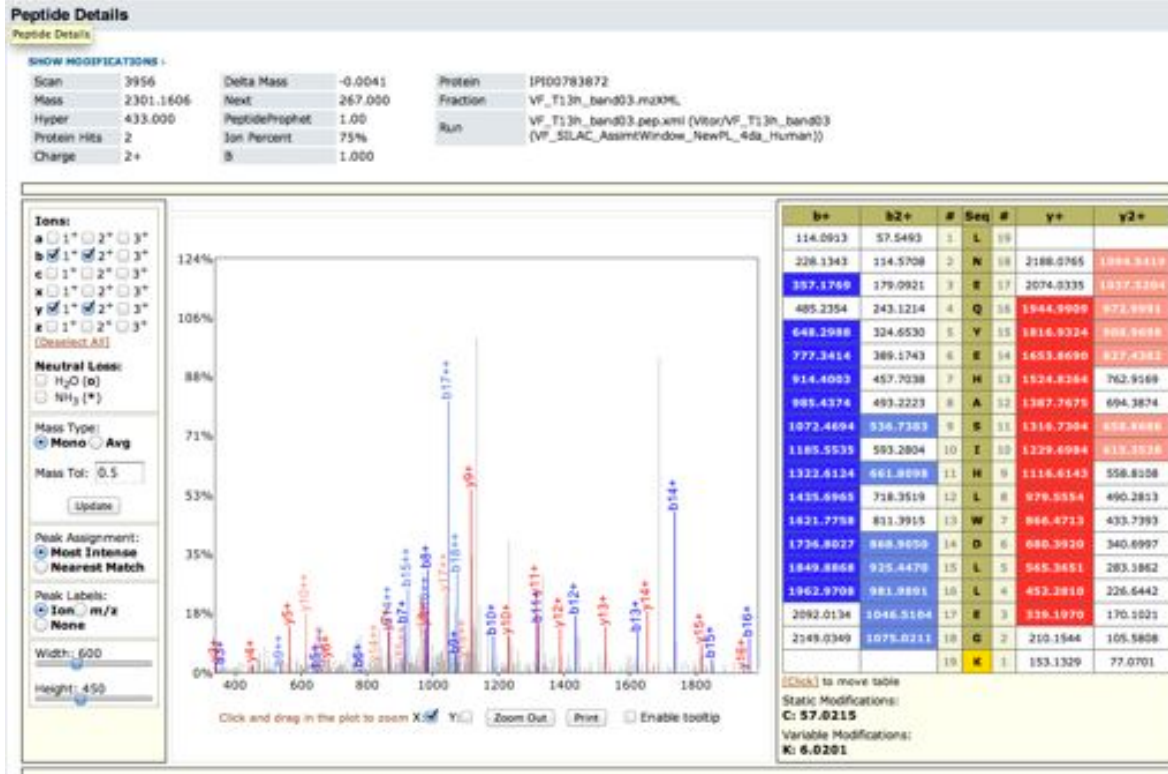

| Protein Probab. | Protein     | Tot. Peptides | Unique Peptides | Best Gene Name | Scan # | Charge | Delta Mass | Peptide Prophet Score | Peptide Sequence       |
|-----------------|-------------|---------------|-----------------|----------------|--------|--------|------------|-----------------------|------------------------|
| 0,9877          | IPI00032409 | 1             | 1               | MAPBPIP        | 3961   | 2+     | -0,0201    | 1,0000                | K.AQALVQYLEEPLTQVAAS.- |

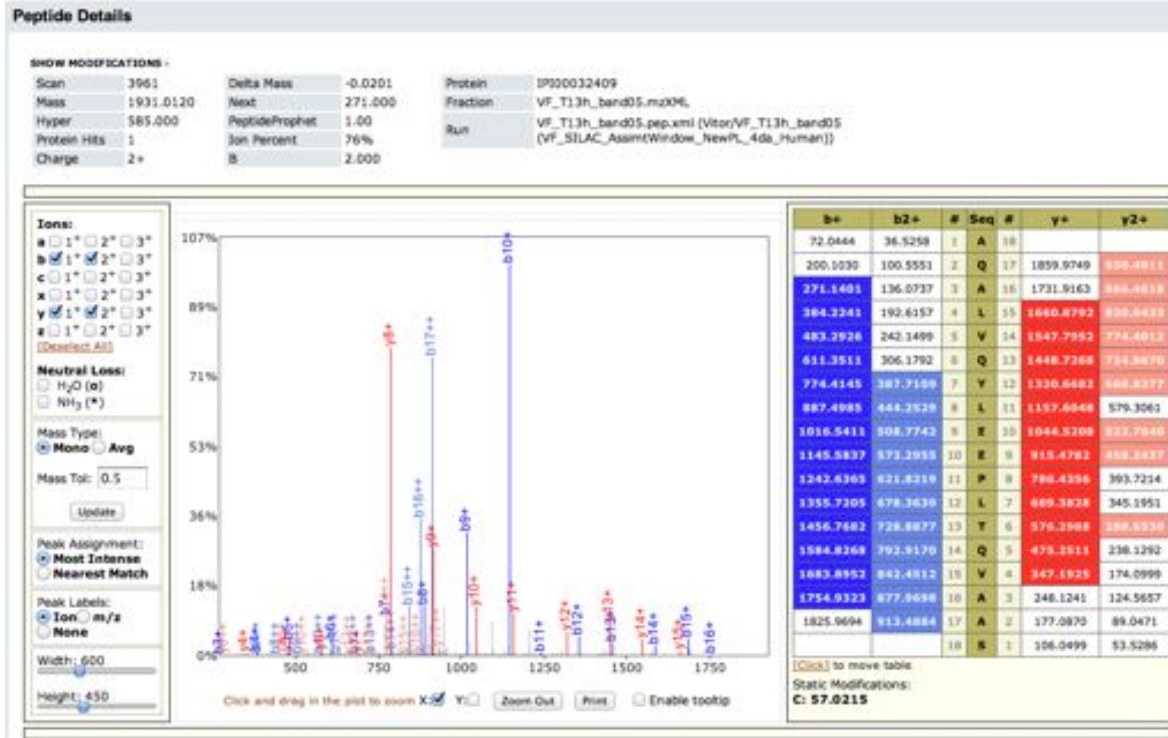

| Protein Probab. | Protein     | Tot. Peptides | Unique Peptides | Best Gene Name | Scan # | Charge | Delta Mass | Peptide Prophet Score | Peptide Sequence   |
|-----------------|-------------|---------------|-----------------|----------------|--------|--------|------------|-----------------------|--------------------|
| 0,8447          | IP100296374 | 1             | 1               | ZFPL1          | 3968   | 2+     | +0,0110    | 0,9860                | R.LVCYDLFWACLNER.A |

### Peptide Details

#### SHOW MODIFICATIONS -

|              |           |                |         |          |                                                                                      |
|--------------|-----------|----------------|---------|----------|--------------------------------------------------------------------------------------|
| Scan         | 3968      | Delta Mass     | +0.0110 | Protein  | IP000296374                                                                          |
| Mass         | 1995.9200 | Next           | 304.000 | Fraction | VF_T13h_band03.mzXML                                                                 |
| Hyper        | 440.000   | PeptideProphet | 0.99    | Run      | VF_T13h_band03.pep.xml (Vitor/VF_T13h_band03 (VF_SILAC_AssmtWindow_NewPt_4ds_Human)) |
| Protein Hits | 1         | Ion Percent    | 86%     |          |                                                                                      |
| Charge       | 2+        | B              | 1.000   |          |                                                                                      |

#### Ions:

- 1<sup>+</sup>  2<sup>+</sup>  3<sup>+</sup>  
 1<sup>+</sup>  2<sup>+</sup>  3<sup>+</sup>

[Deselect All]

#### Neutral Loss:

H<sub>2</sub>O (0)

NH<sub>3</sub> (\*)

#### Mass Type:

Mono  Avg

Mass Tol: 0.5

[Update]

#### Peak Assignment:

Most Intense

Nearest Match

#### Peak Labels:

Ion m/z

None

Width: 600

Height: 450

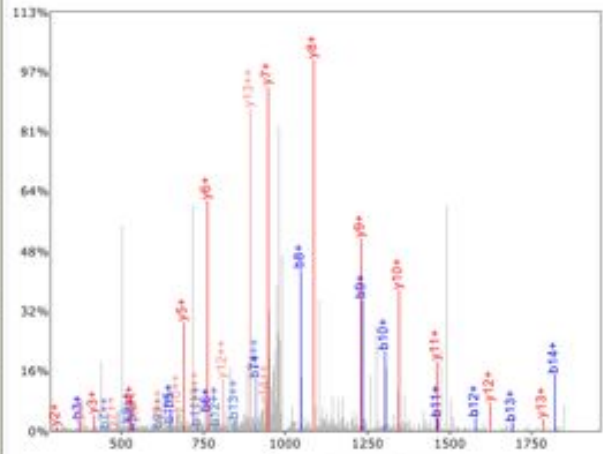

Click and drag in the plot to zoom X: [X] Y: [Y] [Zoom Out] [Print] [Enable tooltip]

| b+        | b2+      | #  | Seq # | y+        | y2+      |
|-----------|----------|----|-------|-----------|----------|
| 114.0923  | 57.5493  | 1  | L 15  |           |          |
| 213.1598  | 107.0835 | 2  | V 14  | 1882.8364 | 941.8116 |
| 373.1904  | 187.0989 | 3  | C 13  | 1783.7680 | 891.8878 |
| 536.1938  | 268.6305 | 4  | Y 12  | 1433.7373 | 813.3733 |
| 691.2897  | 326.1440 | 5  | D 11  | 1460.6740 | 730.8406 |
| 764.3648  | 382.6860 | 6  | L 10  | 1345.6470 | 673.3373 |
| 911.4332  | 456.2203 | 7  | F 9   | 1232.5630 | 616.7851 |
| 1048.4921 | 524.7487 | 8  | H 8   | 1085.4946 | 542.2505 |
| 1234.5714 | 617.7893 | 9  | W 7   | 948.4356  | 474.7218 |
| 1305.6085 | 653.3079 | 10 | A 6   | 762.3583  | 381.8816 |
| 1469.6392 | 733.3232 | 11 | C 5   | 691.3192  | 346.1632 |
| 1578.7233 | 789.6653 | 12 | L 4   | 531.2885  | 266.1479 |
| 1892.7682 | 846.8867 | 13 | N 3   | 418.2049  | 209.6059 |
| 1821.8086 | 911.4080 | 14 | E 2   | 304.1615  | 152.5844 |
|           |          | 15 | R 1   | 175.1190  | 88.0631  |

[Click] to move table

Static Modifications:

C: 57.0215

| Protein Probab. | Protein     | Tot. Peptides | Unique Peptides | Best Gene Name | Scan # | Charge | Delta Mass | Peptide Prophet Score | Peptide Sequence      |
|-----------------|-------------|---------------|-----------------|----------------|--------|--------|------------|-----------------------|-----------------------|
| 0,9851          | IPI00009680 | 1             | 1               | MRPL44         | 3996   | 2+     | -0,0200    | 1,0000                | K.NLVDFLTGEEV/CHVAR.N |

### Peptide Details

#### SHOW MODIFICATIONS

|              |           |                 |         |          |                                                                                    |
|--------------|-----------|-----------------|---------|----------|------------------------------------------------------------------------------------|
| Scan         | 3996      | Delta Mass      | -0.0200 | Protein  | IPI00009680                                                                        |
| Mass         | 1957.9800 | Next            | 342.000 | Fraction | VF_T13h_band04.mzXML                                                               |
| Hyper        | 694.000   | Peptide/Prophet | 1.00    | Run      | VF_T13h_band04_sep.xml (vitor/VF_T13h_band04 (VF_SLAC_AssimWindow_NewP_4da_Human)) |
| Protein Hits | 1         | Ion Percent     | 91%     |          |                                                                                    |
| Charge       | 2+        | B               | 1.000   |          |                                                                                    |

**Ions:**

1<sup>+</sup>  2<sup>+</sup>  3<sup>+</sup>  
 1<sup>+</sup>  2<sup>+</sup>  3<sup>+</sup>  
[\[Deselect All\]](#)

**Neutral Loss:**

H<sub>2</sub>O (0)  
 NH<sub>3</sub> (\*)

**Mass Type:**

Mono  Avg

Mass Tol: 0.5

[Update](#)

**Peak Assignment:**

Most Intense  
 Nearest Match

**Peak Labels:**

Ion  m/z  None

Width: 500

Height: 450

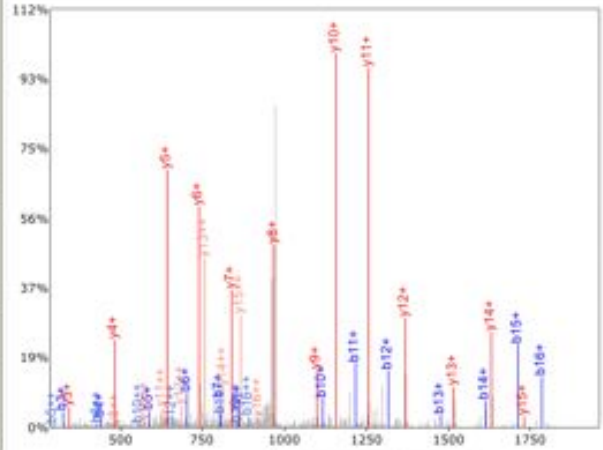

| b+        | b2+      | #  | Seq # | y+ | y2+       |
|-----------|----------|----|-------|----|-----------|
| 115.0502  | 58.0287  | 1  | N     | 17 |           |
| 228.1343  | 114.5708 | 3  | L     | 16 | 1843.9371 |
| 327.3037  | 164.1050 | 3  | V     | 15 | 1739.8531 |
| 442.2294  | 221.6185 | 4  | D     | 14 | 1431.7847 |
| 589.2980  | 295.1527 | 5  | F     | 13 | 1516.7577 |
| 792.3821  | 351.6947 | 6  | L     | 12 | 1369.6893 |
| 893.4298  | 402.2185 | 7  | T     | 11 | 1256.6052 |
| 860.4512  | 430.7293 | 8  | G     | 10 | 1155.5576 |
| 989.4938  | 495.2506 | 9  | E     | 9  | 1099.5361 |
| 1118.5364 | 559.7719 | 10 | E     | 8  | 999.4935  |
| 1217.6048 | 609.3061 | 11 | V     | 7  | 846.4509  |
| 1316.6733 | 658.8403 | 12 | V     | 6  | 741.3825  |
| 1476.7039 | 738.8556 | 13 | C     | 5  | 642.3141  |
| 1613.7429 | 807.3831 | 14 | H     | 4  | 482.3834  |
| 1712.8313 | 856.9193 | 15 | V     | 3  | 345.2245  |
| 1783.8684 | 892.4378 | 16 | A     | 2  | 246.1561  |
|           |          | 17 | N     | 1  | 175.1190  |

[\[Click\]](#) to move table

Static Modifications:

**C: 57.0215**

| Protein Probab. | Protein     | Tot. Peptides | Unique Peptides | Best Gene Name | Scan # | Charge | Delta Mass | Peptide Prophet Score | Peptide Sequence        |
|-----------------|-------------|---------------|-----------------|----------------|--------|--------|------------|-----------------------|-------------------------|
| 0,9881          | IPI00007049 | 1             | 1               | MRPS18C        | 4021   | 2+     | -0,0203    | 0,9999                | K.NVQLLSQFVSPFTGCIYGR.H |

Apple  
<http://www.apple.com/>

SHOW MODIFICATIONS

|              |           |                |         |          |                                               |
|--------------|-----------|----------------|---------|----------|-----------------------------------------------|
| Scan         | 4021      | Delta Mass     | -0.0203 | Protein  | IPI00007049                                   |
| Mass         | 2186.1060 | Next           | 334.000 | Fraction | VF_T13h_band06.mzXML                          |
| Hyper        | 750.000   | PeptideProphet | 1.00    | Run      | VF_T13h_band06.pep.xml (Vibrio/VF_T13h_band06 |
| Protein Hits | 1         | Ion Percent    | 78%     |          | (VF_SILAC_AssayWindow_NewPL_4db_human))       |
| Charge       | 2+        | B              | 1.000   |          |                                               |

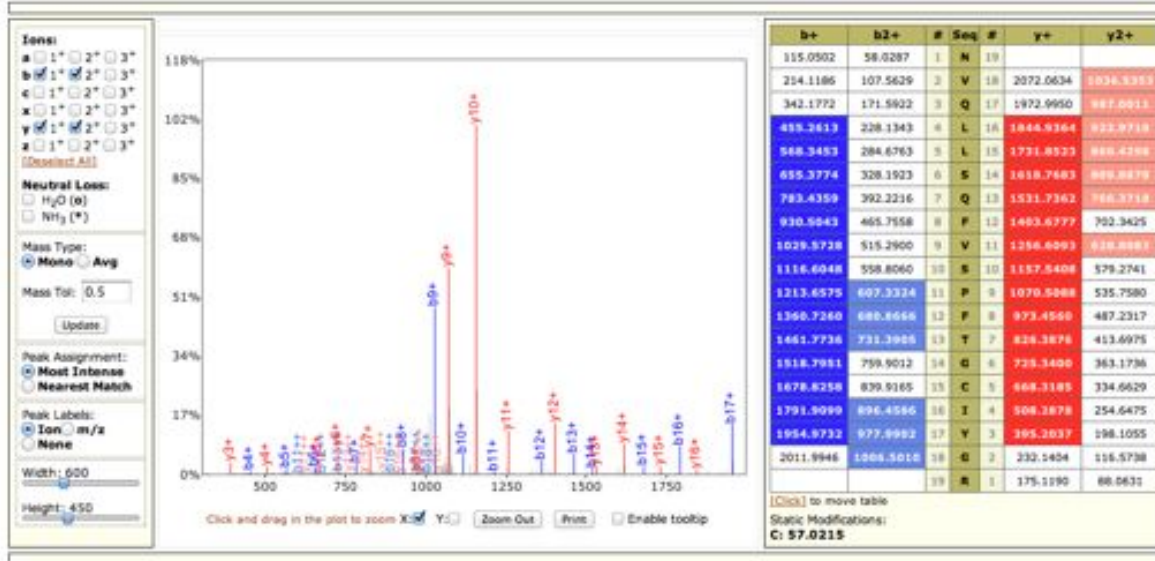

| Protein Probab. | Protein                                     | Tot. Peptides | Unique Peptides | Best Gene Name         | Scan # | Charge | Delta Mass | Peptide Prophet Score | Peptide Sequence |
|-----------------|---------------------------------------------|---------------|-----------------|------------------------|--------|--------|------------|-----------------------|------------------|
| 0,8928          | IPI00795171,<br>IPI00001716,<br>IPI00619930 | 1             | 1               | PUS1,<br>PUS1,<br>PUS1 | 4024   | 2+     | -0,0129    | 0,9931                | K.TIEDDLVSALVR.S |

### Peptide Details

#### SHOW MODIFICATIONS

|              |           |                |         |          |                                              |
|--------------|-----------|----------------|---------|----------|----------------------------------------------|
| Scan         | 4024      | Delta Mass     | -0.0129 | Protein  | IPI00001716                                  |
| Mass         | 1330.7210 | Next           | 295.000 | Fraction | VF_T13H_band04.mzXML                         |
| Hyper        | 393.000   | PeptideProphet | 0.99    | Run      | VF_T13H_band04.pep.xml (Vitor/VF_T13H_band04 |
| Protein Hits | 3         | Ion Percent    | 82%     |          | (VF_SILAC_AssimWindow_NewPl_4da_Human)       |
| Charge       | 2+        | B              | 1.000   |          |                                              |

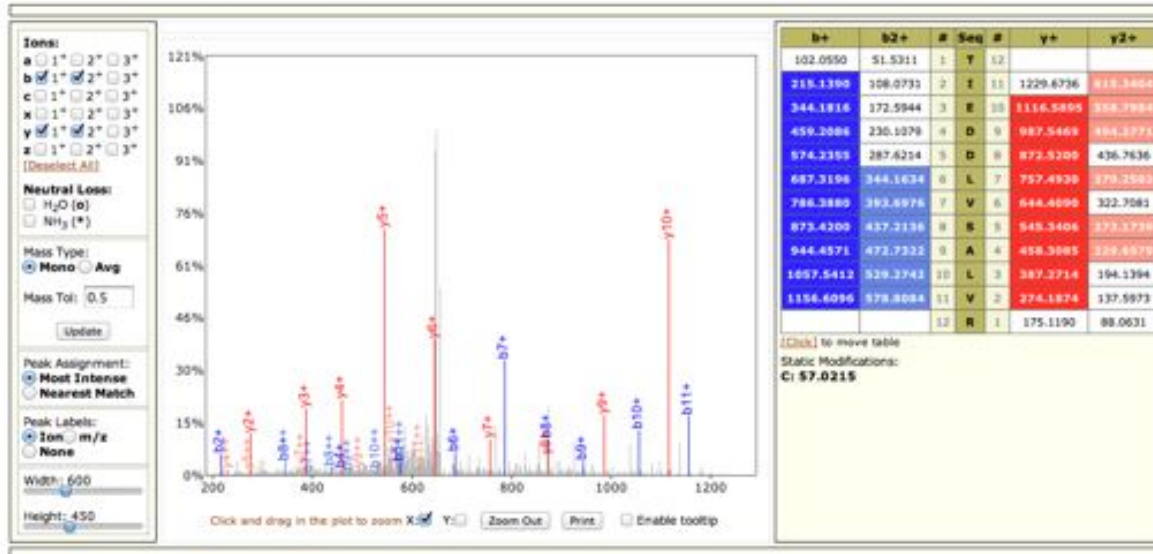

| Protein Probab. | Protein                     | Tot. Peptides | Unique Peptides | Best Gene Name  | Scan # | Charge | Delta Mass | Peptide Prophet Score | Peptide Sequence  |
|-----------------|-----------------------------|---------------|-----------------|-----------------|--------|--------|------------|-----------------------|-------------------|
| 0,9741          | IPI00646262,<br>IPI00019407 | 1             | 1               | NSDHL,<br>NSDHL | 4027   | 2+     | -0,0136    | 0,9988                | R.DPQLVPILIEAAR.N |

**Peptide Details**

Peptide Details  
SHOW MODIFICATIONS

|                 |                      |                                                                                           |
|-----------------|----------------------|-------------------------------------------------------------------------------------------|
| Scan: 4027      | Delta Mass: -0.0136  | Protein: IPI00019407                                                                      |
| Mass: 1434.8310 | Next: 283.000        | Fraction: VF_T13h_band03.mzXML                                                            |
| Hyper: 432.000  | PeptideProphet: 1.00 | Run: VF_T13h_band03.pep.xml (Vitor/VF_T13h_band03 [VF_SILAC_AssmtWindow_NewPL_4ds_Human]) |
| Protein Hits: 2 | Ion Percent: 83%     |                                                                                           |
| Charge: 2+      | B: 1.000             |                                                                                           |

  

| <b>Ions:</b><br><input type="checkbox"/> 1+ <input type="checkbox"/> 2+ <input type="checkbox"/> 3+<br><input checked="" type="checkbox"/> 1+ <input checked="" type="checkbox"/> 2+ <input type="checkbox"/> 3+<br><input type="checkbox"/> 1+ <input type="checkbox"/> 2+ <input type="checkbox"/> 3+<br><input type="checkbox"/> 1+ <input type="checkbox"/> 2+ <input type="checkbox"/> 3+<br><input checked="" type="checkbox"/> 1+ <input checked="" type="checkbox"/> 2+ <input type="checkbox"/> 3+<br><input type="checkbox"/> 1+ <input type="checkbox"/> 2+ <input type="checkbox"/> 3+<br><input type="checkbox"/> 1+ <input type="checkbox"/> 2+ <input type="checkbox"/> 3+<br><a href="#">[Deselect All]</a> |                                                                                                                                                      | <table border="1"> <thead> <tr> <th>b+</th> <th>b2+</th> <th>#</th> <th>Seq #</th> <th>y+</th> <th>y2+</th> </tr> </thead> <tbody> <tr><td>116.0342</td><td>58.5207</td><td>1</td><td>D</td><td>13</td><td></td></tr> <tr><td>213.0670</td><td>107.0471</td><td>2</td><td>F</td><td>12</td><td>1319.8045</td></tr> <tr><td>341.1456</td><td>171.0764</td><td>3</td><td>Q</td><td>11</td><td>1222.7518</td></tr> <tr><td>454.2298</td><td>227.6185</td><td>4</td><td>L</td><td>10</td><td>1094.6932</td></tr> <tr><td>553.2980</td><td>277.1527</td><td>5</td><td>V</td><td>9</td><td>881.6091</td></tr> <tr><td>650.3598</td><td>325.6790</td><td>6</td><td>F</td><td>8</td><td>882.5407</td></tr> <tr><td>763.4349</td><td>382.2311</td><td>7</td><td>I</td><td>7</td><td>785.4880</td></tr> <tr><td>876.5189</td><td>438.7631</td><td>8</td><td>L</td><td>6</td><td>672.4039</td></tr> <tr><td>999.6030</td><td>495.3031</td><td>9</td><td>I</td><td>5</td><td>559.3198</td></tr> <tr><td>1118.6458</td><td>559.8284</td><td>10</td><td>E</td><td>4</td><td>446.2258</td></tr> <tr><td>1189.6827</td><td>595.3450</td><td>11</td><td>A</td><td>3</td><td>317.1932</td></tr> <tr><td>1260.7198</td><td>630.8635</td><td>12</td><td>A</td><td>2</td><td>346.1561</td></tr> <tr><td></td><td></td><td>13</td><td>R</td><td>1</td><td>175.1190</td></tr> </tbody> </table> | b+ | b2+   | #         | Seq # | y+ | y2+ | 116.0342 | 58.5207 | 1 | D | 13 |  | 213.0670 | 107.0471 | 2 | F | 12 | 1319.8045 | 341.1456 | 171.0764 | 3 | Q | 11 | 1222.7518 | 454.2298 | 227.6185 | 4 | L | 10 | 1094.6932 | 553.2980 | 277.1527 | 5 | V | 9 | 881.6091 | 650.3598 | 325.6790 | 6 | F | 8 | 882.5407 | 763.4349 | 382.2311 | 7 | I | 7 | 785.4880 | 876.5189 | 438.7631 | 8 | L | 6 | 672.4039 | 999.6030 | 495.3031 | 9 | I | 5 | 559.3198 | 1118.6458 | 559.8284 | 10 | E | 4 | 446.2258 | 1189.6827 | 595.3450 | 11 | A | 3 | 317.1932 | 1260.7198 | 630.8635 | 12 | A | 2 | 346.1561 |  |  | 13 | R | 1 | 175.1190 |
|-----------------------------------------------------------------------------------------------------------------------------------------------------------------------------------------------------------------------------------------------------------------------------------------------------------------------------------------------------------------------------------------------------------------------------------------------------------------------------------------------------------------------------------------------------------------------------------------------------------------------------------------------------------------------------------------------------------------------------|------------------------------------------------------------------------------------------------------------------------------------------------------|--------------------------------------------------------------------------------------------------------------------------------------------------------------------------------------------------------------------------------------------------------------------------------------------------------------------------------------------------------------------------------------------------------------------------------------------------------------------------------------------------------------------------------------------------------------------------------------------------------------------------------------------------------------------------------------------------------------------------------------------------------------------------------------------------------------------------------------------------------------------------------------------------------------------------------------------------------------------------------------------------------------------------------------------------------------------------------------------------------------------------------------------------------------------------------------------------------------------------------------------------------------------------------------------------------------------------------------------------------------------------|----|-------|-----------|-------|----|-----|----------|---------|---|---|----|--|----------|----------|---|---|----|-----------|----------|----------|---|---|----|-----------|----------|----------|---|---|----|-----------|----------|----------|---|---|---|----------|----------|----------|---|---|---|----------|----------|----------|---|---|---|----------|----------|----------|---|---|---|----------|----------|----------|---|---|---|----------|-----------|----------|----|---|---|----------|-----------|----------|----|---|---|----------|-----------|----------|----|---|---|----------|--|--|----|---|---|----------|
| b+                                                                                                                                                                                                                                                                                                                                                                                                                                                                                                                                                                                                                                                                                                                          |                                                                                                                                                      | b2+                                                                                                                                                                                                                                                                                                                                                                                                                                                                                                                                                                                                                                                                                                                                                                                                                                                                                                                                                                                                                                                                                                                                                                                                                                                                                                                                                                      | #  | Seq # | y+        | y2+   |    |     |          |         |   |   |    |  |          |          |   |   |    |           |          |          |   |   |    |           |          |          |   |   |    |           |          |          |   |   |   |          |          |          |   |   |   |          |          |          |   |   |   |          |          |          |   |   |   |          |          |          |   |   |   |          |           |          |    |   |   |          |           |          |    |   |   |          |           |          |    |   |   |          |  |  |    |   |   |          |
| 116.0342                                                                                                                                                                                                                                                                                                                                                                                                                                                                                                                                                                                                                                                                                                                    | 58.5207                                                                                                                                              | 1                                                                                                                                                                                                                                                                                                                                                                                                                                                                                                                                                                                                                                                                                                                                                                                                                                                                                                                                                                                                                                                                                                                                                                                                                                                                                                                                                                        | D  | 13    |           |       |    |     |          |         |   |   |    |  |          |          |   |   |    |           |          |          |   |   |    |           |          |          |   |   |    |           |          |          |   |   |   |          |          |          |   |   |   |          |          |          |   |   |   |          |          |          |   |   |   |          |          |          |   |   |   |          |           |          |    |   |   |          |           |          |    |   |   |          |           |          |    |   |   |          |  |  |    |   |   |          |
| 213.0670                                                                                                                                                                                                                                                                                                                                                                                                                                                                                                                                                                                                                                                                                                                    | 107.0471                                                                                                                                             | 2                                                                                                                                                                                                                                                                                                                                                                                                                                                                                                                                                                                                                                                                                                                                                                                                                                                                                                                                                                                                                                                                                                                                                                                                                                                                                                                                                                        | F  | 12    | 1319.8045 |       |    |     |          |         |   |   |    |  |          |          |   |   |    |           |          |          |   |   |    |           |          |          |   |   |    |           |          |          |   |   |   |          |          |          |   |   |   |          |          |          |   |   |   |          |          |          |   |   |   |          |          |          |   |   |   |          |           |          |    |   |   |          |           |          |    |   |   |          |           |          |    |   |   |          |  |  |    |   |   |          |
| 341.1456                                                                                                                                                                                                                                                                                                                                                                                                                                                                                                                                                                                                                                                                                                                    | 171.0764                                                                                                                                             | 3                                                                                                                                                                                                                                                                                                                                                                                                                                                                                                                                                                                                                                                                                                                                                                                                                                                                                                                                                                                                                                                                                                                                                                                                                                                                                                                                                                        | Q  | 11    | 1222.7518 |       |    |     |          |         |   |   |    |  |          |          |   |   |    |           |          |          |   |   |    |           |          |          |   |   |    |           |          |          |   |   |   |          |          |          |   |   |   |          |          |          |   |   |   |          |          |          |   |   |   |          |          |          |   |   |   |          |           |          |    |   |   |          |           |          |    |   |   |          |           |          |    |   |   |          |  |  |    |   |   |          |
| 454.2298                                                                                                                                                                                                                                                                                                                                                                                                                                                                                                                                                                                                                                                                                                                    | 227.6185                                                                                                                                             | 4                                                                                                                                                                                                                                                                                                                                                                                                                                                                                                                                                                                                                                                                                                                                                                                                                                                                                                                                                                                                                                                                                                                                                                                                                                                                                                                                                                        | L  | 10    | 1094.6932 |       |    |     |          |         |   |   |    |  |          |          |   |   |    |           |          |          |   |   |    |           |          |          |   |   |    |           |          |          |   |   |   |          |          |          |   |   |   |          |          |          |   |   |   |          |          |          |   |   |   |          |          |          |   |   |   |          |           |          |    |   |   |          |           |          |    |   |   |          |           |          |    |   |   |          |  |  |    |   |   |          |
| 553.2980                                                                                                                                                                                                                                                                                                                                                                                                                                                                                                                                                                                                                                                                                                                    | 277.1527                                                                                                                                             | 5                                                                                                                                                                                                                                                                                                                                                                                                                                                                                                                                                                                                                                                                                                                                                                                                                                                                                                                                                                                                                                                                                                                                                                                                                                                                                                                                                                        | V  | 9     | 881.6091  |       |    |     |          |         |   |   |    |  |          |          |   |   |    |           |          |          |   |   |    |           |          |          |   |   |    |           |          |          |   |   |   |          |          |          |   |   |   |          |          |          |   |   |   |          |          |          |   |   |   |          |          |          |   |   |   |          |           |          |    |   |   |          |           |          |    |   |   |          |           |          |    |   |   |          |  |  |    |   |   |          |
| 650.3598                                                                                                                                                                                                                                                                                                                                                                                                                                                                                                                                                                                                                                                                                                                    | 325.6790                                                                                                                                             | 6                                                                                                                                                                                                                                                                                                                                                                                                                                                                                                                                                                                                                                                                                                                                                                                                                                                                                                                                                                                                                                                                                                                                                                                                                                                                                                                                                                        | F  | 8     | 882.5407  |       |    |     |          |         |   |   |    |  |          |          |   |   |    |           |          |          |   |   |    |           |          |          |   |   |    |           |          |          |   |   |   |          |          |          |   |   |   |          |          |          |   |   |   |          |          |          |   |   |   |          |          |          |   |   |   |          |           |          |    |   |   |          |           |          |    |   |   |          |           |          |    |   |   |          |  |  |    |   |   |          |
| 763.4349                                                                                                                                                                                                                                                                                                                                                                                                                                                                                                                                                                                                                                                                                                                    | 382.2311                                                                                                                                             | 7                                                                                                                                                                                                                                                                                                                                                                                                                                                                                                                                                                                                                                                                                                                                                                                                                                                                                                                                                                                                                                                                                                                                                                                                                                                                                                                                                                        | I  | 7     | 785.4880  |       |    |     |          |         |   |   |    |  |          |          |   |   |    |           |          |          |   |   |    |           |          |          |   |   |    |           |          |          |   |   |   |          |          |          |   |   |   |          |          |          |   |   |   |          |          |          |   |   |   |          |          |          |   |   |   |          |           |          |    |   |   |          |           |          |    |   |   |          |           |          |    |   |   |          |  |  |    |   |   |          |
| 876.5189                                                                                                                                                                                                                                                                                                                                                                                                                                                                                                                                                                                                                                                                                                                    | 438.7631                                                                                                                                             | 8                                                                                                                                                                                                                                                                                                                                                                                                                                                                                                                                                                                                                                                                                                                                                                                                                                                                                                                                                                                                                                                                                                                                                                                                                                                                                                                                                                        | L  | 6     | 672.4039  |       |    |     |          |         |   |   |    |  |          |          |   |   |    |           |          |          |   |   |    |           |          |          |   |   |    |           |          |          |   |   |   |          |          |          |   |   |   |          |          |          |   |   |   |          |          |          |   |   |   |          |          |          |   |   |   |          |           |          |    |   |   |          |           |          |    |   |   |          |           |          |    |   |   |          |  |  |    |   |   |          |
| 999.6030                                                                                                                                                                                                                                                                                                                                                                                                                                                                                                                                                                                                                                                                                                                    | 495.3031                                                                                                                                             | 9                                                                                                                                                                                                                                                                                                                                                                                                                                                                                                                                                                                                                                                                                                                                                                                                                                                                                                                                                                                                                                                                                                                                                                                                                                                                                                                                                                        | I  | 5     | 559.3198  |       |    |     |          |         |   |   |    |  |          |          |   |   |    |           |          |          |   |   |    |           |          |          |   |   |    |           |          |          |   |   |   |          |          |          |   |   |   |          |          |          |   |   |   |          |          |          |   |   |   |          |          |          |   |   |   |          |           |          |    |   |   |          |           |          |    |   |   |          |           |          |    |   |   |          |  |  |    |   |   |          |
| 1118.6458                                                                                                                                                                                                                                                                                                                                                                                                                                                                                                                                                                                                                                                                                                                   | 559.8284                                                                                                                                             | 10                                                                                                                                                                                                                                                                                                                                                                                                                                                                                                                                                                                                                                                                                                                                                                                                                                                                                                                                                                                                                                                                                                                                                                                                                                                                                                                                                                       | E  | 4     | 446.2258  |       |    |     |          |         |   |   |    |  |          |          |   |   |    |           |          |          |   |   |    |           |          |          |   |   |    |           |          |          |   |   |   |          |          |          |   |   |   |          |          |          |   |   |   |          |          |          |   |   |   |          |          |          |   |   |   |          |           |          |    |   |   |          |           |          |    |   |   |          |           |          |    |   |   |          |  |  |    |   |   |          |
| 1189.6827                                                                                                                                                                                                                                                                                                                                                                                                                                                                                                                                                                                                                                                                                                                   | 595.3450                                                                                                                                             | 11                                                                                                                                                                                                                                                                                                                                                                                                                                                                                                                                                                                                                                                                                                                                                                                                                                                                                                                                                                                                                                                                                                                                                                                                                                                                                                                                                                       | A  | 3     | 317.1932  |       |    |     |          |         |   |   |    |  |          |          |   |   |    |           |          |          |   |   |    |           |          |          |   |   |    |           |          |          |   |   |   |          |          |          |   |   |   |          |          |          |   |   |   |          |          |          |   |   |   |          |          |          |   |   |   |          |           |          |    |   |   |          |           |          |    |   |   |          |           |          |    |   |   |          |  |  |    |   |   |          |
| 1260.7198                                                                                                                                                                                                                                                                                                                                                                                                                                                                                                                                                                                                                                                                                                                   | 630.8635                                                                                                                                             | 12                                                                                                                                                                                                                                                                                                                                                                                                                                                                                                                                                                                                                                                                                                                                                                                                                                                                                                                                                                                                                                                                                                                                                                                                                                                                                                                                                                       | A  | 2     | 346.1561  |       |    |     |          |         |   |   |    |  |          |          |   |   |    |           |          |          |   |   |    |           |          |          |   |   |    |           |          |          |   |   |   |          |          |          |   |   |   |          |          |          |   |   |   |          |          |          |   |   |   |          |          |          |   |   |   |          |           |          |    |   |   |          |           |          |    |   |   |          |           |          |    |   |   |          |  |  |    |   |   |          |
|                                                                                                                                                                                                                                                                                                                                                                                                                                                                                                                                                                                                                                                                                                                             |                                                                                                                                                      | 13                                                                                                                                                                                                                                                                                                                                                                                                                                                                                                                                                                                                                                                                                                                                                                                                                                                                                                                                                                                                                                                                                                                                                                                                                                                                                                                                                                       | R  | 1     | 175.1190  |       |    |     |          |         |   |   |    |  |          |          |   |   |    |           |          |          |   |   |    |           |          |          |   |   |    |           |          |          |   |   |   |          |          |          |   |   |   |          |          |          |   |   |   |          |          |          |   |   |   |          |          |          |   |   |   |          |           |          |    |   |   |          |           |          |    |   |   |          |           |          |    |   |   |          |  |  |    |   |   |          |
| <b>Neutral Loss:</b><br><input type="checkbox"/> H <sub>2</sub> O (0)<br><input type="checkbox"/> NH <sub>3</sub> (*)                                                                                                                                                                                                                                                                                                                                                                                                                                                                                                                                                                                                       | <b>Mass Type:</b><br><input checked="" type="checkbox"/> Mono <input type="checkbox"/> Avg<br>Mass Tol: 0.5<br><input type="button" value="Update"/> | <input type="button" value="Click"/> to move table<br><b>Static Modifications:</b><br><b>C: 57.0215</b>                                                                                                                                                                                                                                                                                                                                                                                                                                                                                                                                                                                                                                                                                                                                                                                                                                                                                                                                                                                                                                                                                                                                                                                                                                                                  |    |       |           |       |    |     |          |         |   |   |    |  |          |          |   |   |    |           |          |          |   |   |    |           |          |          |   |   |    |           |          |          |   |   |   |          |          |          |   |   |   |          |          |          |   |   |   |          |          |          |   |   |   |          |          |          |   |   |   |          |           |          |    |   |   |          |           |          |    |   |   |          |           |          |    |   |   |          |  |  |    |   |   |          |

Peak Assignment:  
 Most Intense  
 Nearest Match

Peak Labels:  
 Ion, m/z  
 None

Width: 600  
 Height: 450

Click and drag in the plot to zoom X: Y:    Enable tooltip



| Protein Probab. | Protein     | Tot. Peptides | Unique Peptides | Best Gene Name | Scan # | Charge | Delta Mass | Peptide Prophet Score | Peptide Sequence    |
|-----------------|-------------|---------------|-----------------|----------------|--------|--------|------------|-----------------------|---------------------|
| 0,9819          | IP100298971 | 1             | 1               | VTN            | 4028   | 2+     | -0,0162    | 1,0000                | R.DVWGIEGPIDAAFTR.I |

### Peptide Details

#### SHOW MODIFICATIONS :

|              |           |                |         |
|--------------|-----------|----------------|---------|
| Scan         | 4028      | Delta Mass     | -0.0162 |
| Mass         | 1646.8170 | Next           | 342.000 |
| Hyper        | 698.000   | PeptideProphet | 1.00    |
| Protein Hits | 1         | Ion Percent    | 82%     |
| Charge       | 2+        | B              | 1.000   |

#### Peptide Details

|          |                                                                                       |
|----------|---------------------------------------------------------------------------------------|
| Protein  | IP100298971                                                                           |
| Fraction | VF_T13h_band02.mzXML                                                                  |
| Run      | VF_T13h_band02 pep.xml (vitor/VF_T13h_band02 (VF_SILAC_Aasim@window_NewPl_4da_Human)) |

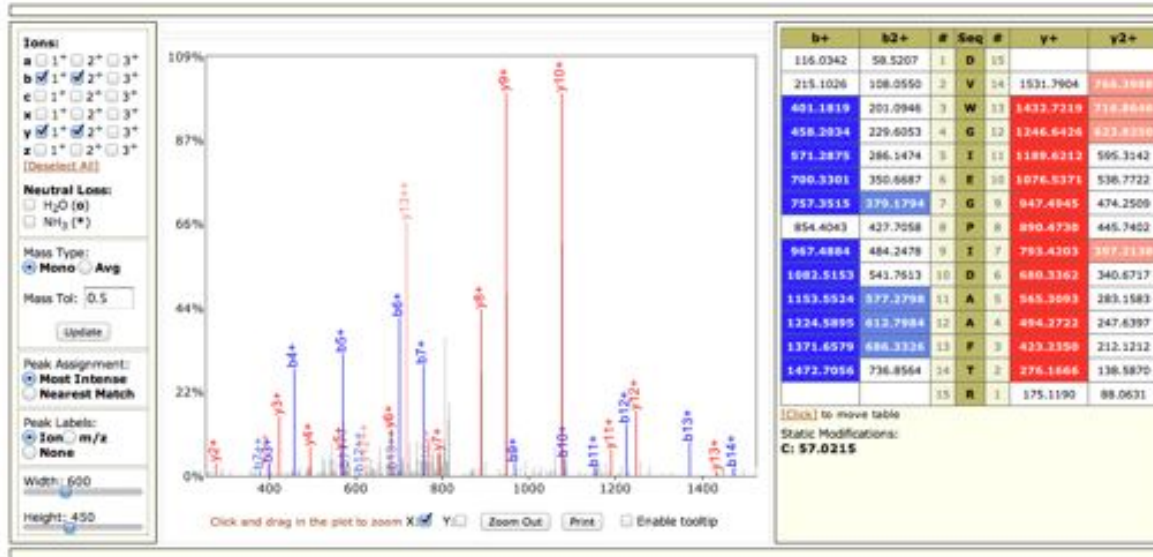

| Protein Probab. | Protein                                                                                     | Tot. Peptides | Unique Peptides | Best Gene Name                                    | Scan # | Charge | Delta Mass | Peptide Prophet Score | Peptide Sequence      |
|-----------------|---------------------------------------------------------------------------------------------|---------------|-----------------|---------------------------------------------------|--------|--------|------------|-----------------------|-----------------------|
| 0,9845          | IPI00790783,<br>IPI00657664,<br>IPI00789393,<br>IPI00013260,<br>IPI00902983,<br>IPI00554652 | 1             | 1               | LSP1,<br>LSP1,<br>LSP1,<br>LSP1,<br>LSP1,<br>LSP1 | 4033   | 2+     | -0,0177    | 0,9997                | K.IDQWLEQYTQAIETAGR.T |

### Peptide Details

#### SHOW MODIFICATIONS

|              |           |                 |         |          |                                                                                         |
|--------------|-----------|-----------------|---------|----------|-----------------------------------------------------------------------------------------|
| Scan         | 4033      | Delta Mass      | -0.0177 | Protein  | IPI00013260                                                                             |
| Mass         | 2021.9930 | Next            | 327.000 | Fraction | VF_T13h_band03.mzXML                                                                    |
| Hyper        | 521.000   | Peptide/Prophet | 1.00    | Run      | VF_T13h_band03.pep.xml (Vitor/VF_T13h_band03<br>[VF_SILAC_AssimWindow_NewPL_4da_Human]) |
| Protein Hits | 6         | Ion Percent     | 81%     |          |                                                                                         |
| Charge       | 2+        | B               | 1.000   |          |                                                                                         |

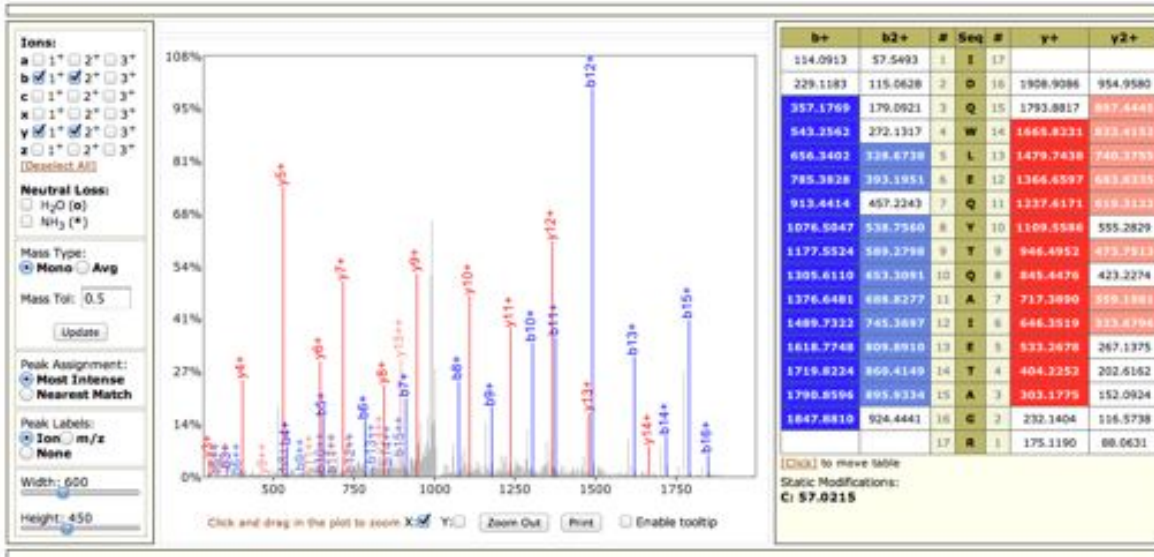

| Protein Probab. | Protein                                                                     | Tot. Peptides | Unique Peptides | Best Gene Name                                     | Scan # | Charge | Delta Mass | Peptide Prophet Score | Peptide Sequence              |
|-----------------|-----------------------------------------------------------------------------|---------------|-----------------|----------------------------------------------------|--------|--------|------------|-----------------------|-------------------------------|
| 0,9756          | IPI00790114,<br>IPI00472168,<br>IPI00796313,<br>IPI00009444,<br>IPI00873328 | 1             | 1               | MRPL27,<br>MRPL27,<br>MRPL27,<br>MRPL27,<br>MRPL27 | 4043   | 2+     | -0,0152    | 0,9990                | K.C <sup>A</sup> LYALEEGIVR.Y |

**Peptide Details**

SHOW MODIFICATIONS

|                 |                      |                                                   |
|-----------------|----------------------|---------------------------------------------------|
| Scan: 4043      | Delta Mass: -0.0152  | Protein: IPI00009444                              |
| Mass: 1305.6510 | Next: 443.000        | Fraction: VF_T13h_band05.mzXML                    |
| Hyper: 565.000  | PeptideProphet: 1.00 | Run: VF_T13h_band05.pep.xml (Vitor/VF_T13h_band05 |
| Protein Hits: 5 | Ion Percent: 80%     | (VF_SILAC_AssimWindow_NewPL_4da_Human))           |
| Charge: 2+      | B: 1.000             |                                                   |

  

| <b>Ions:</b><br><input type="checkbox"/> 1 <sup>+</sup> <input type="checkbox"/> 2 <sup>+</sup> <input type="checkbox"/> 3 <sup>+</sup><br><input checked="" type="checkbox"/> 1 <sup>+</sup> <input checked="" type="checkbox"/> 2 <sup>+</sup> <input type="checkbox"/> 3 <sup>+</sup><br><input type="checkbox"/> 1 <sup>+</sup> <input type="checkbox"/> 2 <sup>+</sup> <input type="checkbox"/> 3 <sup>+</sup><br><input type="checkbox"/> 1 <sup>+</sup> <input type="checkbox"/> 2 <sup>+</sup> <input type="checkbox"/> 3 <sup>+</sup><br><input checked="" type="checkbox"/> 1 <sup>+</sup> <input checked="" type="checkbox"/> 2 <sup>+</sup> <input type="checkbox"/> 3 <sup>+</sup><br><input type="checkbox"/> 1 <sup>+</sup> <input type="checkbox"/> 2 <sup>+</sup> <input type="checkbox"/> 3 <sup>+</sup><br>[Delete All] |                                                                                                                      | <table border="1"> <thead> <tr> <th>b+</th> <th>b2+</th> <th>#</th> <th>Seq #</th> <th>y+</th> <th>y2+</th> </tr> </thead> <tbody> <tr> <td>144.0115</td> <td>72.5094</td> <td>1</td> <td>C 11</td> <td></td> <td></td> </tr> <tr> <td>357.0955</td> <td>129.0514</td> <td>3</td> <td>L 10</td> <td>1162.6467</td> <td>381.8370</td> </tr> <tr> <td>420.1589</td> <td>210.5831</td> <td>3</td> <td>Y 9</td> <td>1049.5626</td> <td>319.2849</td> </tr> <tr> <td>491.1360</td> <td>246.1008</td> <td>4</td> <td>A 8</td> <td>886.4953</td> <td>443.7533</td> </tr> <tr> <td>604.2800</td> <td>302.6437</td> <td>5</td> <td>L 7</td> <td>815.4621</td> <td>408.2347</td> </tr> <tr> <td>733.5226</td> <td>367.1650</td> <td>6</td> <td>R 6</td> <td>702.3781</td> <td>351.8827</td> </tr> <tr> <td>862.3652</td> <td>431.6862</td> <td>7</td> <td>E 5</td> <td>573.3355</td> <td>287.3716</td> </tr> <tr> <td>919.3867</td> <td>460.1978</td> <td>8</td> <td>G 4</td> <td>444.2929</td> <td>222.6501</td> </tr> <tr> <td>1033.4797</td> <td>516.7398</td> <td>9</td> <td>I 3</td> <td>387.2714</td> <td>194.1394</td> </tr> <tr> <td>1131.5392</td> <td>566.2732</td> <td>10</td> <td>V 2</td> <td>274.1874</td> <td>137.5973</td> </tr> <tr> <td></td> <td></td> <td>11</td> <td>R 1</td> <td>175.1190</td> <td>88.0631</td> </tr> </tbody> </table> | b+   | b2+       | #        | Seq # | y+ | y2+ | 144.0115 | 72.5094 | 1 | C 11 |  |  | 357.0955 | 129.0514 | 3 | L 10 | 1162.6467 | 381.8370 | 420.1589 | 210.5831 | 3 | Y 9 | 1049.5626 | 319.2849 | 491.1360 | 246.1008 | 4 | A 8 | 886.4953 | 443.7533 | 604.2800 | 302.6437 | 5 | L 7 | 815.4621 | 408.2347 | 733.5226 | 367.1650 | 6 | R 6 | 702.3781 | 351.8827 | 862.3652 | 431.6862 | 7 | E 5 | 573.3355 | 287.3716 | 919.3867 | 460.1978 | 8 | G 4 | 444.2929 | 222.6501 | 1033.4797 | 516.7398 | 9 | I 3 | 387.2714 | 194.1394 | 1131.5392 | 566.2732 | 10 | V 2 | 274.1874 | 137.5973 |  |  | 11 | R 1 | 175.1190 | 88.0631 |
|--------------------------------------------------------------------------------------------------------------------------------------------------------------------------------------------------------------------------------------------------------------------------------------------------------------------------------------------------------------------------------------------------------------------------------------------------------------------------------------------------------------------------------------------------------------------------------------------------------------------------------------------------------------------------------------------------------------------------------------------------------------------------------------------------------------------------------------------|----------------------------------------------------------------------------------------------------------------------|-----------------------------------------------------------------------------------------------------------------------------------------------------------------------------------------------------------------------------------------------------------------------------------------------------------------------------------------------------------------------------------------------------------------------------------------------------------------------------------------------------------------------------------------------------------------------------------------------------------------------------------------------------------------------------------------------------------------------------------------------------------------------------------------------------------------------------------------------------------------------------------------------------------------------------------------------------------------------------------------------------------------------------------------------------------------------------------------------------------------------------------------------------------------------------------------------------------------------------------------------------------------------------------------------------------------------------------------------------|------|-----------|----------|-------|----|-----|----------|---------|---|------|--|--|----------|----------|---|------|-----------|----------|----------|----------|---|-----|-----------|----------|----------|----------|---|-----|----------|----------|----------|----------|---|-----|----------|----------|----------|----------|---|-----|----------|----------|----------|----------|---|-----|----------|----------|----------|----------|---|-----|----------|----------|-----------|----------|---|-----|----------|----------|-----------|----------|----|-----|----------|----------|--|--|----|-----|----------|---------|
| b+                                                                                                                                                                                                                                                                                                                                                                                                                                                                                                                                                                                                                                                                                                                                                                                                                                         |                                                                                                                      | b2+                                                                                                                                                                                                                                                                                                                                                                                                                                                                                                                                                                                                                                                                                                                                                                                                                                                                                                                                                                                                                                                                                                                                                                                                                                                                                                                                                 | #    | Seq #     | y+       | y2+   |    |     |          |         |   |      |  |  |          |          |   |      |           |          |          |          |   |     |           |          |          |          |   |     |          |          |          |          |   |     |          |          |          |          |   |     |          |          |          |          |   |     |          |          |          |          |   |     |          |          |           |          |   |     |          |          |           |          |    |     |          |          |  |  |    |     |          |         |
| 144.0115                                                                                                                                                                                                                                                                                                                                                                                                                                                                                                                                                                                                                                                                                                                                                                                                                                   | 72.5094                                                                                                              | 1                                                                                                                                                                                                                                                                                                                                                                                                                                                                                                                                                                                                                                                                                                                                                                                                                                                                                                                                                                                                                                                                                                                                                                                                                                                                                                                                                   | C 11 |           |          |       |    |     |          |         |   |      |  |  |          |          |   |      |           |          |          |          |   |     |           |          |          |          |   |     |          |          |          |          |   |     |          |          |          |          |   |     |          |          |          |          |   |     |          |          |          |          |   |     |          |          |           |          |   |     |          |          |           |          |    |     |          |          |  |  |    |     |          |         |
| 357.0955                                                                                                                                                                                                                                                                                                                                                                                                                                                                                                                                                                                                                                                                                                                                                                                                                                   | 129.0514                                                                                                             | 3                                                                                                                                                                                                                                                                                                                                                                                                                                                                                                                                                                                                                                                                                                                                                                                                                                                                                                                                                                                                                                                                                                                                                                                                                                                                                                                                                   | L 10 | 1162.6467 | 381.8370 |       |    |     |          |         |   |      |  |  |          |          |   |      |           |          |          |          |   |     |           |          |          |          |   |     |          |          |          |          |   |     |          |          |          |          |   |     |          |          |          |          |   |     |          |          |          |          |   |     |          |          |           |          |   |     |          |          |           |          |    |     |          |          |  |  |    |     |          |         |
| 420.1589                                                                                                                                                                                                                                                                                                                                                                                                                                                                                                                                                                                                                                                                                                                                                                                                                                   | 210.5831                                                                                                             | 3                                                                                                                                                                                                                                                                                                                                                                                                                                                                                                                                                                                                                                                                                                                                                                                                                                                                                                                                                                                                                                                                                                                                                                                                                                                                                                                                                   | Y 9  | 1049.5626 | 319.2849 |       |    |     |          |         |   |      |  |  |          |          |   |      |           |          |          |          |   |     |           |          |          |          |   |     |          |          |          |          |   |     |          |          |          |          |   |     |          |          |          |          |   |     |          |          |          |          |   |     |          |          |           |          |   |     |          |          |           |          |    |     |          |          |  |  |    |     |          |         |
| 491.1360                                                                                                                                                                                                                                                                                                                                                                                                                                                                                                                                                                                                                                                                                                                                                                                                                                   | 246.1008                                                                                                             | 4                                                                                                                                                                                                                                                                                                                                                                                                                                                                                                                                                                                                                                                                                                                                                                                                                                                                                                                                                                                                                                                                                                                                                                                                                                                                                                                                                   | A 8  | 886.4953  | 443.7533 |       |    |     |          |         |   |      |  |  |          |          |   |      |           |          |          |          |   |     |           |          |          |          |   |     |          |          |          |          |   |     |          |          |          |          |   |     |          |          |          |          |   |     |          |          |          |          |   |     |          |          |           |          |   |     |          |          |           |          |    |     |          |          |  |  |    |     |          |         |
| 604.2800                                                                                                                                                                                                                                                                                                                                                                                                                                                                                                                                                                                                                                                                                                                                                                                                                                   | 302.6437                                                                                                             | 5                                                                                                                                                                                                                                                                                                                                                                                                                                                                                                                                                                                                                                                                                                                                                                                                                                                                                                                                                                                                                                                                                                                                                                                                                                                                                                                                                   | L 7  | 815.4621  | 408.2347 |       |    |     |          |         |   |      |  |  |          |          |   |      |           |          |          |          |   |     |           |          |          |          |   |     |          |          |          |          |   |     |          |          |          |          |   |     |          |          |          |          |   |     |          |          |          |          |   |     |          |          |           |          |   |     |          |          |           |          |    |     |          |          |  |  |    |     |          |         |
| 733.5226                                                                                                                                                                                                                                                                                                                                                                                                                                                                                                                                                                                                                                                                                                                                                                                                                                   | 367.1650                                                                                                             | 6                                                                                                                                                                                                                                                                                                                                                                                                                                                                                                                                                                                                                                                                                                                                                                                                                                                                                                                                                                                                                                                                                                                                                                                                                                                                                                                                                   | R 6  | 702.3781  | 351.8827 |       |    |     |          |         |   |      |  |  |          |          |   |      |           |          |          |          |   |     |           |          |          |          |   |     |          |          |          |          |   |     |          |          |          |          |   |     |          |          |          |          |   |     |          |          |          |          |   |     |          |          |           |          |   |     |          |          |           |          |    |     |          |          |  |  |    |     |          |         |
| 862.3652                                                                                                                                                                                                                                                                                                                                                                                                                                                                                                                                                                                                                                                                                                                                                                                                                                   | 431.6862                                                                                                             | 7                                                                                                                                                                                                                                                                                                                                                                                                                                                                                                                                                                                                                                                                                                                                                                                                                                                                                                                                                                                                                                                                                                                                                                                                                                                                                                                                                   | E 5  | 573.3355  | 287.3716 |       |    |     |          |         |   |      |  |  |          |          |   |      |           |          |          |          |   |     |           |          |          |          |   |     |          |          |          |          |   |     |          |          |          |          |   |     |          |          |          |          |   |     |          |          |          |          |   |     |          |          |           |          |   |     |          |          |           |          |    |     |          |          |  |  |    |     |          |         |
| 919.3867                                                                                                                                                                                                                                                                                                                                                                                                                                                                                                                                                                                                                                                                                                                                                                                                                                   | 460.1978                                                                                                             | 8                                                                                                                                                                                                                                                                                                                                                                                                                                                                                                                                                                                                                                                                                                                                                                                                                                                                                                                                                                                                                                                                                                                                                                                                                                                                                                                                                   | G 4  | 444.2929  | 222.6501 |       |    |     |          |         |   |      |  |  |          |          |   |      |           |          |          |          |   |     |           |          |          |          |   |     |          |          |          |          |   |     |          |          |          |          |   |     |          |          |          |          |   |     |          |          |          |          |   |     |          |          |           |          |   |     |          |          |           |          |    |     |          |          |  |  |    |     |          |         |
| 1033.4797                                                                                                                                                                                                                                                                                                                                                                                                                                                                                                                                                                                                                                                                                                                                                                                                                                  | 516.7398                                                                                                             | 9                                                                                                                                                                                                                                                                                                                                                                                                                                                                                                                                                                                                                                                                                                                                                                                                                                                                                                                                                                                                                                                                                                                                                                                                                                                                                                                                                   | I 3  | 387.2714  | 194.1394 |       |    |     |          |         |   |      |  |  |          |          |   |      |           |          |          |          |   |     |           |          |          |          |   |     |          |          |          |          |   |     |          |          |          |          |   |     |          |          |          |          |   |     |          |          |          |          |   |     |          |          |           |          |   |     |          |          |           |          |    |     |          |          |  |  |    |     |          |         |
| 1131.5392                                                                                                                                                                                                                                                                                                                                                                                                                                                                                                                                                                                                                                                                                                                                                                                                                                  | 566.2732                                                                                                             | 10                                                                                                                                                                                                                                                                                                                                                                                                                                                                                                                                                                                                                                                                                                                                                                                                                                                                                                                                                                                                                                                                                                                                                                                                                                                                                                                                                  | V 2  | 274.1874  | 137.5973 |       |    |     |          |         |   |      |  |  |          |          |   |      |           |          |          |          |   |     |           |          |          |          |   |     |          |          |          |          |   |     |          |          |          |          |   |     |          |          |          |          |   |     |          |          |          |          |   |     |          |          |           |          |   |     |          |          |           |          |    |     |          |          |  |  |    |     |          |         |
|                                                                                                                                                                                                                                                                                                                                                                                                                                                                                                                                                                                                                                                                                                                                                                                                                                            |                                                                                                                      | 11                                                                                                                                                                                                                                                                                                                                                                                                                                                                                                                                                                                                                                                                                                                                                                                                                                                                                                                                                                                                                                                                                                                                                                                                                                                                                                                                                  | R 1  | 175.1190  | 88.0631  |       |    |     |          |         |   |      |  |  |          |          |   |      |           |          |          |          |   |     |           |          |          |          |   |     |          |          |          |          |   |     |          |          |          |          |   |     |          |          |          |          |   |     |          |          |          |          |   |     |          |          |           |          |   |     |          |          |           |          |    |     |          |          |  |  |    |     |          |         |
| <b>Neutral Loss:</b><br><input type="checkbox"/> H <sub>2</sub> O (0)<br><input type="checkbox"/> NH <sub>3</sub> (*)                                                                                                                                                                                                                                                                                                                                                                                                                                                                                                                                                                                                                                                                                                                      | [Click] to move table<br>Static Modifications:<br><b>C: 57.0215</b><br>Variable Modifications:<br><b>C: -17.0265</b> |                                                                                                                                                                                                                                                                                                                                                                                                                                                                                                                                                                                                                                                                                                                                                                                                                                                                                                                                                                                                                                                                                                                                                                                                                                                                                                                                                     |      |           |          |       |    |     |          |         |   |      |  |  |          |          |   |      |           |          |          |          |   |     |           |          |          |          |   |     |          |          |          |          |   |     |          |          |          |          |   |     |          |          |          |          |   |     |          |          |          |          |   |     |          |          |           |          |   |     |          |          |           |          |    |     |          |          |  |  |    |     |          |         |

Mass Type:  Mono  Avg  
 Mass Tol: 0.5

Peak Assignment:  Most Intense  Nearest Match

Peak Labels:  Ions, m/z  None

Width: 600  
 Height: 450

Click and drag in the plot to zoom X: Y:    Enable tooltip

| Protein Probab. | Protein     | Tot. Peptides | Unique Peptides | Best Gene Name | Scan # | Charge | Delta Mass | Peptide Prophet Score | Peptide Sequence        |
|-----------------|-------------|---------------|-----------------|----------------|--------|--------|------------|-----------------------|-------------------------|
| 0,9877          | IPI00007049 | 1             | 1               | MRPS18C        | 4046   | 2+     | -0,0193    | 1,0000                | K.NVQLLSQFVSPFTGCIYGR.H |

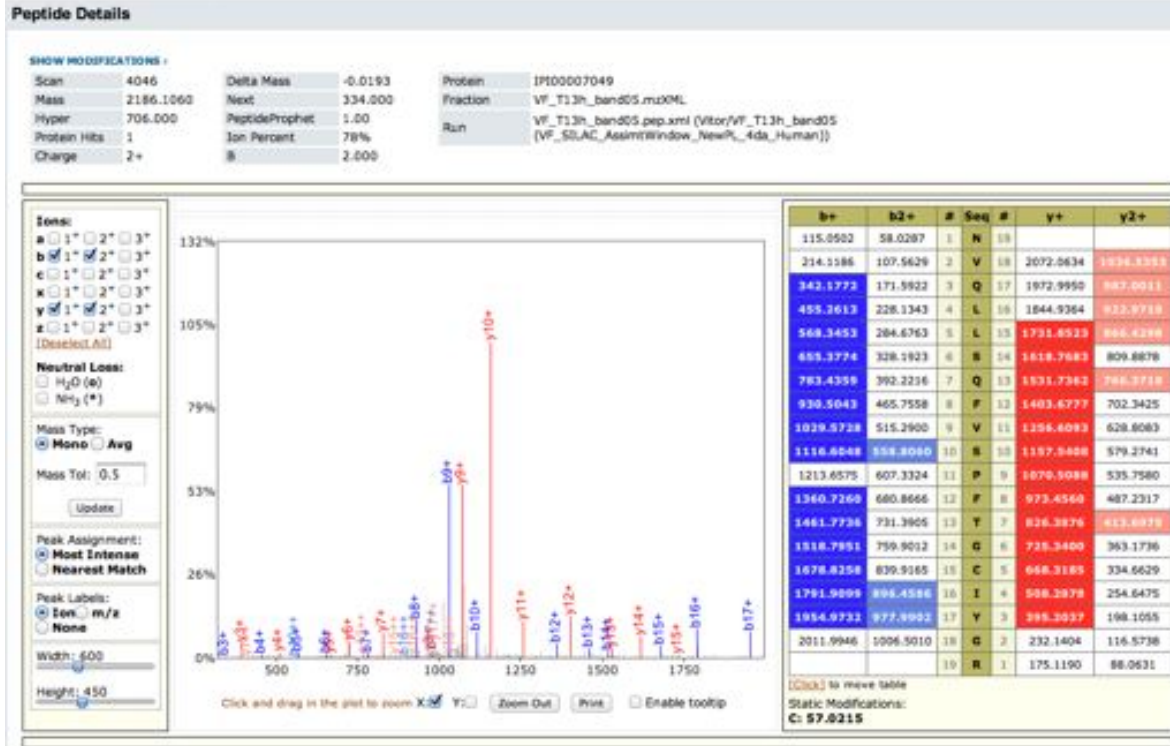

| Protein Probab. | Protein                                     | Tot. Peptides | Unique Peptides | Best Gene Name                     | Scan # | Charge | Delta Mass | Peptide Prophet Score | Peptide Sequence     |
|-----------------|---------------------------------------------|---------------|-----------------|------------------------------------|--------|--------|------------|-----------------------|----------------------|
| 0,9881          | IPI00879142,<br>IPI00430781,<br>IPI00166638 | 1             | 1               | MGC70857,<br>MGC70857,<br>MGC70857 | 4064   | 2+     | -0,0176    | 0,9999                | R.LALTM"DLAPLLLAAR.S |

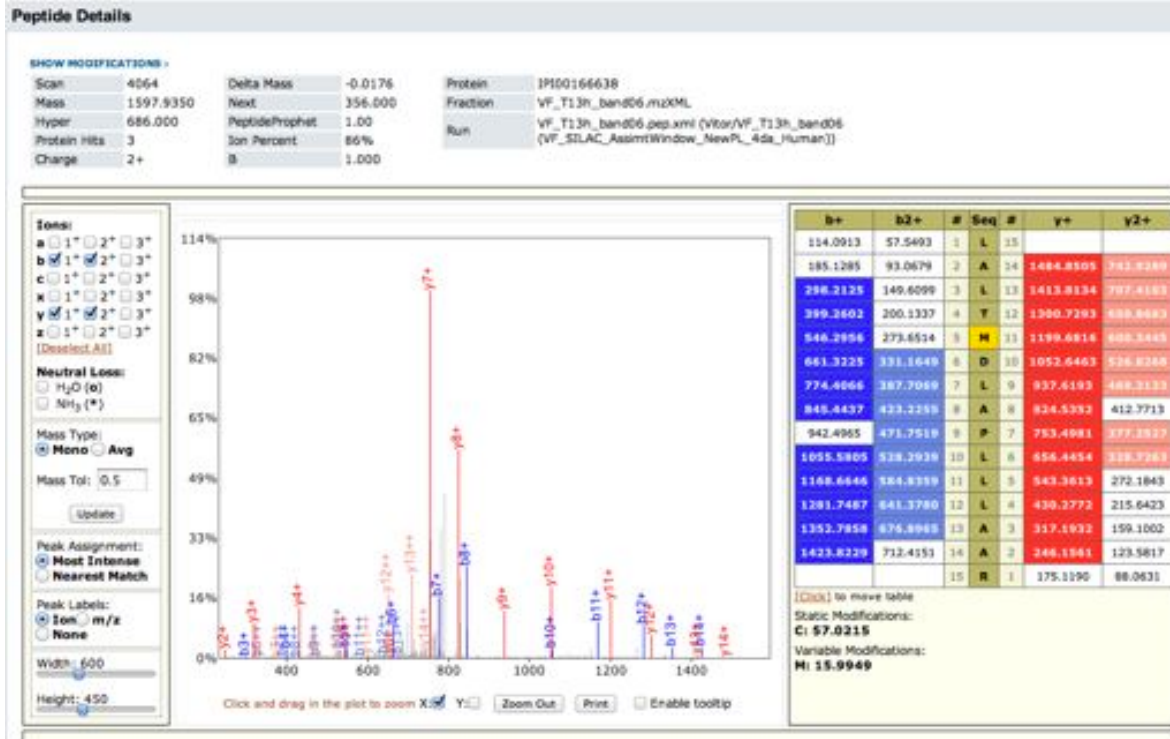

| Protein Probab. | Protein                                                     | Tot. Peptides | Unique Peptides | Best Gene Name          | Scan # | Charge | Delta Mass | Peptide Prophet Score | Peptide Sequence                       |
|-----------------|-------------------------------------------------------------|---------------|-----------------|-------------------------|--------|--------|------------|-----------------------|----------------------------------------|
| 0,9400          | IP100796979,<br>IP100383539,<br>IP100793839,<br>IP100025366 | 1             | 1               | CS,<br>CS,<br>CS,<br>CS | 4065   | 3+     | +0,9674    | 0,9952                | R.EGSGIGAIDSNLDWSHNFTNMLGYTDHQFTELTR.L |

Peptide Details

Peptide Details

SHOW MODIFICATIONS

|                 |                       |                                                  |
|-----------------|-----------------------|--------------------------------------------------|
| Scan: 4065      | Delta Mass: +0.9674   | Protein: IP100025366                             |
| Mass: 3826.7400 | Next: 458.000         | Fraction: vF_T13h_band06.mzXML                   |
| Hyper: 579.000  | Peptide Prophet: 1.00 | Run: vF_T13h_band06.pep.xml (vfor/vF_T13h_band06 |
| Protein Hits: 4 | Ion Percent: 39%      | Run: (vF_SILAC_AssmtWindow_NewPl_4ds_Human)]     |
| Charge: 3+      | g                     |                                                  |

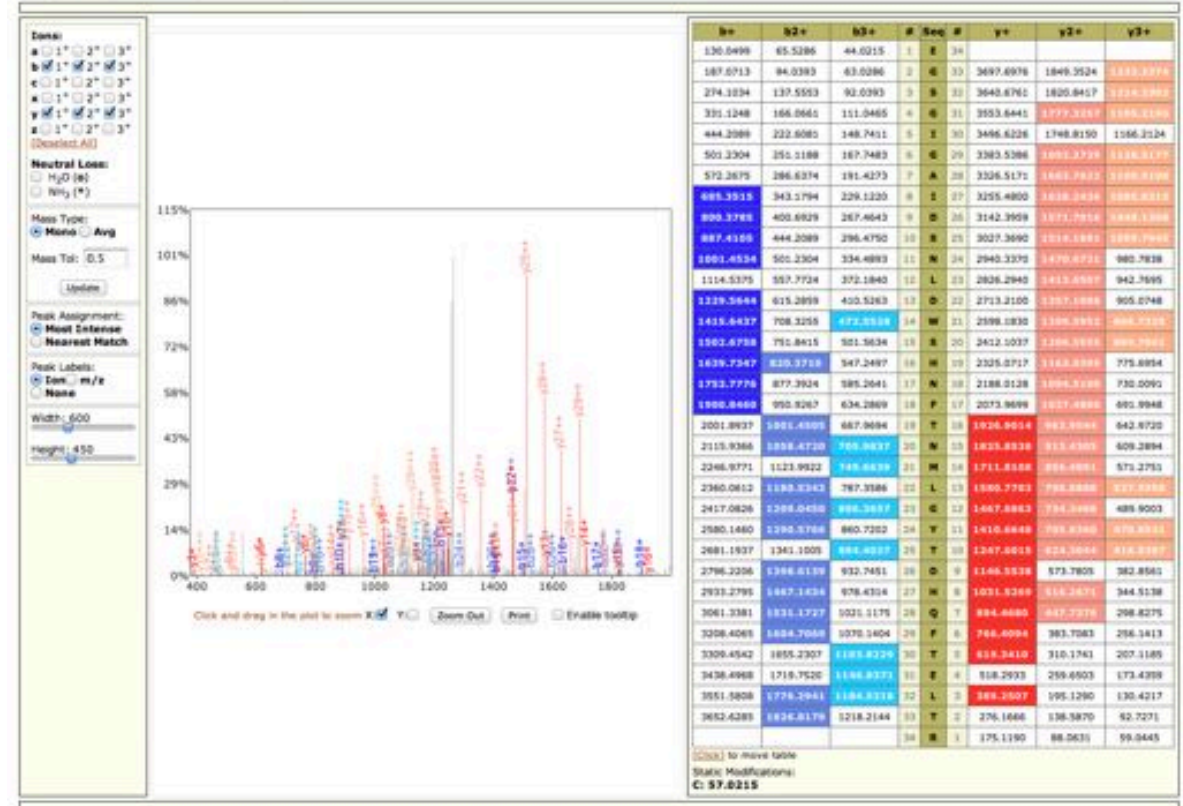

| Protein Probab. | Protein                     | Tot. Peptides | Unique Peptides | Best Gene Name    | Scan # | Charge | Delta Mass | Peptide Prophet Score | Peptide Sequence      |
|-----------------|-----------------------------|---------------|-----------------|-------------------|--------|--------|------------|-----------------------|-----------------------|
| 0,9792          | IPI00290543,<br>IPI00001676 | 1             | 1               | NPLOC4,<br>NPLOC4 | 4067   | 2+     | -0,0242    | 0,9993                | K.VFGAPNVVEIDQYLSK'.Q |

### Peptide Details

#### SHOW MODIFICATIONS

|                 |                      |                                                                                              |
|-----------------|----------------------|----------------------------------------------------------------------------------------------|
| Scan: 4067      | Delta Mass: -0.0242  | Protein: IPI00001676                                                                         |
| Mass: 2029.0220 | Next: 239.000        | Fraction: VF_T13h_band05.mzML                                                                |
| Hydr: 397.000   | PeptideProphet: 1.00 | Run: VF_T13h_band05.pep.xml (Vitor/VF_T13h_band05<br>(VF_SILAC_AssimWindow_NewPL_4da_Human)) |
| Protein Hits: 2 | Ion Percent: 68%     |                                                                                              |
| Charge: 2+      | B: 1.000             |                                                                                              |

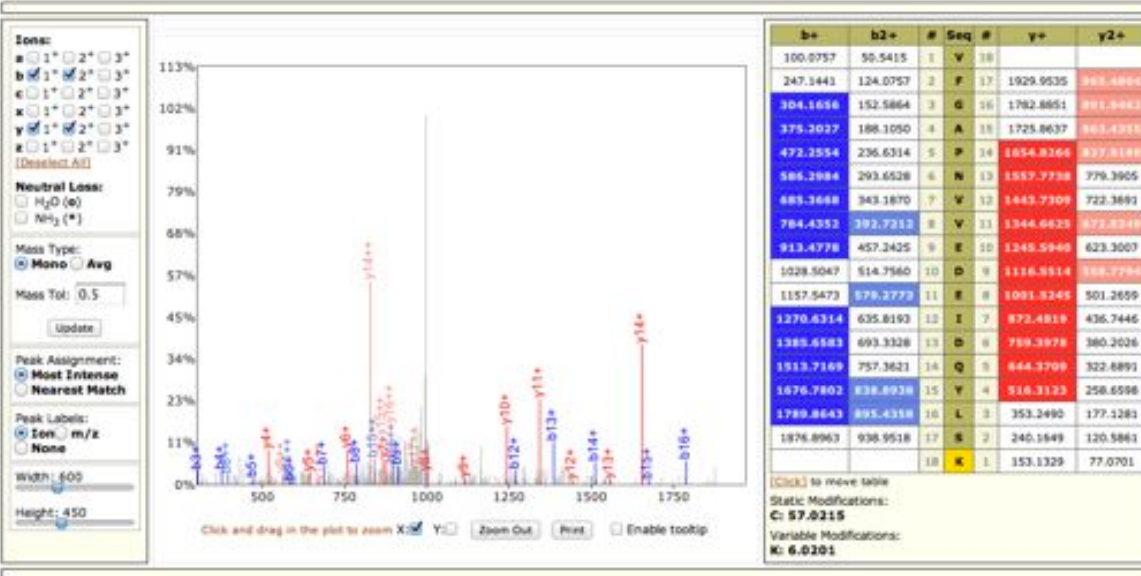

| Protein Probab. | Protein                                                     | Tot. Peptides | Unique Peptides | Best Gene Name          | Scan # | Charge | Delta Mass | Peptide Prophet Score | Peptide Sequence                       |
|-----------------|-------------------------------------------------------------|---------------|-----------------|-------------------------|--------|--------|------------|-----------------------|----------------------------------------|
| 0,9840          | IP100796979,<br>IP100383539,<br>IP100793839,<br>IP100025366 | 1             | 1               | CS,<br>CS,<br>CS,<br>CS | 4087   | 3+     | -0,0716    | 0,9997                | R.EGSGIGAIASNLDWSHNFTNMLGYTDHQFTELTR.L |

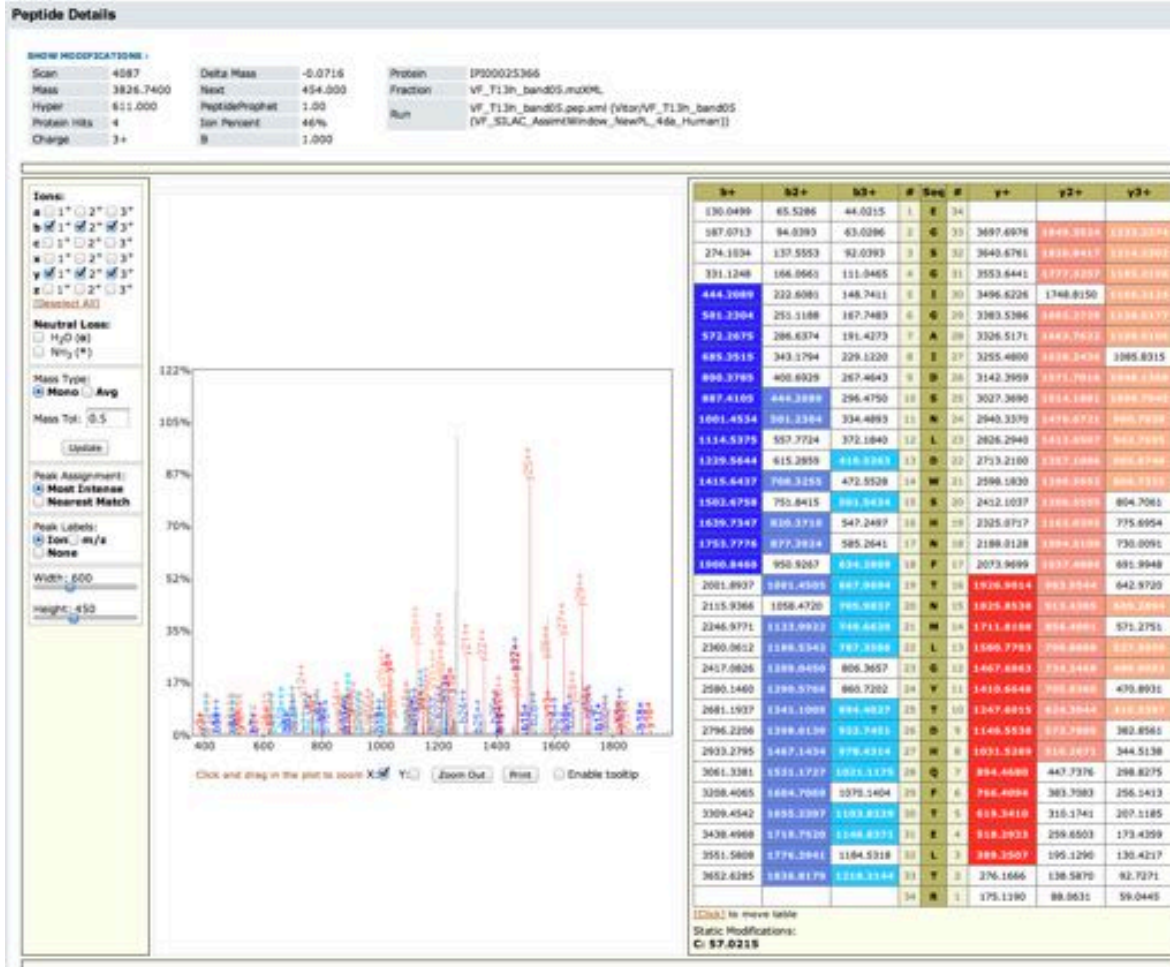



| Protein Probab. | Protein                               | Tot. Peptides | Unique Peptides | Best Gene Name   | Scan # | Charge | Delta Mass | Peptide Prophet Score | Peptide Sequence            |
|-----------------|---------------------------------------|---------------|-----------------|------------------|--------|--------|------------|-----------------------|-----------------------------|
| 0,9801          | IP100853306, IP100029628, IP100790214 | 1             | 1               | RCN2, RCN2, RCN2 | 4088   | 2+     | -0,0276    | 0,9999                | K.LSEEEILENPDLFLTSEATDYGR.Q |

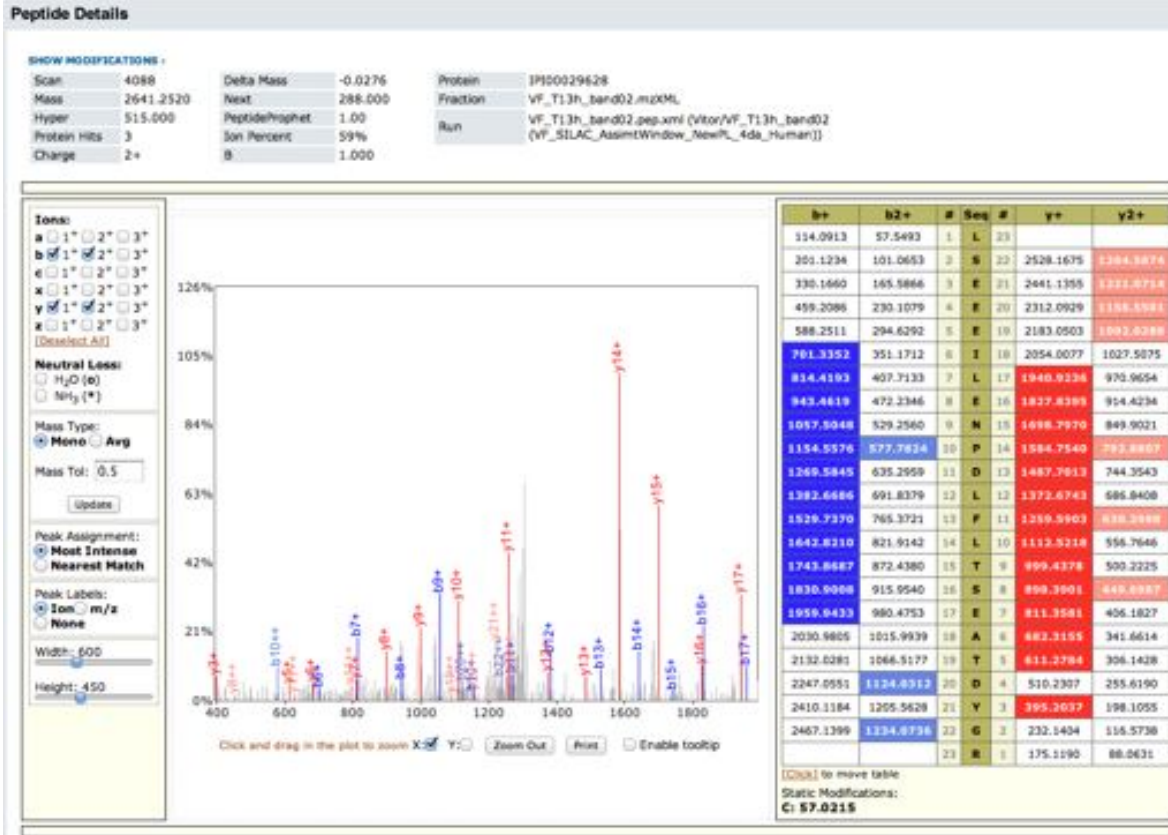

| Protein Probab. | Protein                                                                     | Tot. Peptides | Unique Peptides | Best Gene Name                                | Scan # | Charge | Delta Mass | Peptide Prophet Score | Peptide Sequence        |
|-----------------|-----------------------------------------------------------------------------|---------------|-----------------|-----------------------------------------------|--------|--------|------------|-----------------------|-------------------------|
| 0,9709          | IPI00914952,<br>IPI00914938,<br>IPI00016621,<br>IPI00256684,<br>IPI00304577 | 1             | 1               | AP2A2,<br>AP2A2,<br>AP2A2,<br>AP2A1,<br>AP2A1 | 4099   | 2+     | -0,0220    | 0,9993                | K.VGGYILGFEFGNLIAGDPR.S |

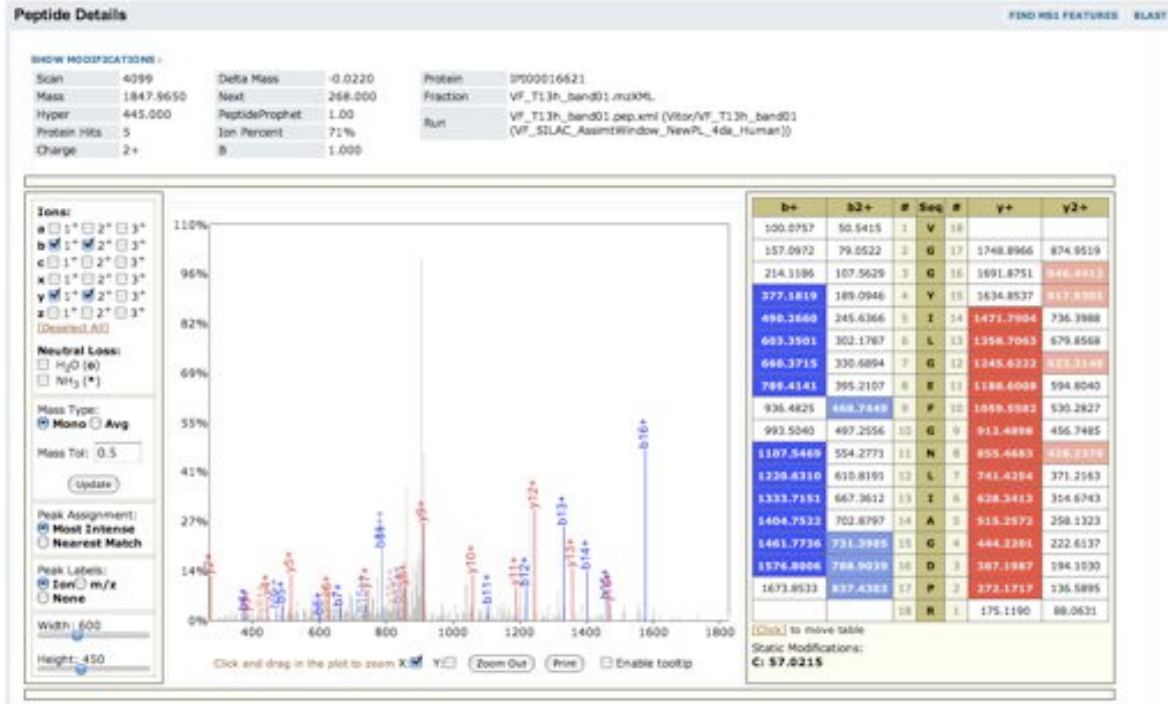

| Protein Probab. | Protein                                                     | Tot. Peptides | Unique Peptides | Best Gene Name                      | Scan # | Charge | Delta Mass | Peptide Prophet Score | Peptide Sequence       |
|-----------------|-------------------------------------------------------------|---------------|-----------------|-------------------------------------|--------|--------|------------|-----------------------|------------------------|
| 0,9881          | IPI00843773,<br>IPI00513959,<br>IPI00215801,<br>IPI00163505 | 1             | 1               | RBM39,<br>RBM39,<br>RBM39,<br>RBM39 | 4102   | 2+     | -0,0170    | 0,9999                | K.C^PSIAAAIAAVNALHGR.W |

### Peptide Details

#### SHOW MODIFICATIONS

|              |           |                 |         |          |                                                                                        |
|--------------|-----------|-----------------|---------|----------|----------------------------------------------------------------------------------------|
| Scan         | 4102      | Delta Mass      | -0.0170 | Protein  | IPI00163505                                                                            |
| Mass         | 1674.8740 | Next            | 305.000 | Fraction | VF_T13h_band06.mzXML                                                                   |
| Hyper        | 618.000   | Peptide/Prophet | 1.00    | Run      | VF_T13h_band06.pep.xml (Vitor/VF_T13h_band06<br>(VF_SILAC_AssimWindow_New%_4da_Human)) |
| Protein Hits | 4         | Ion Percent     | 75%     |          |                                                                                        |
| Charge       | 2+        | S               | 1.000   |          |                                                                                        |

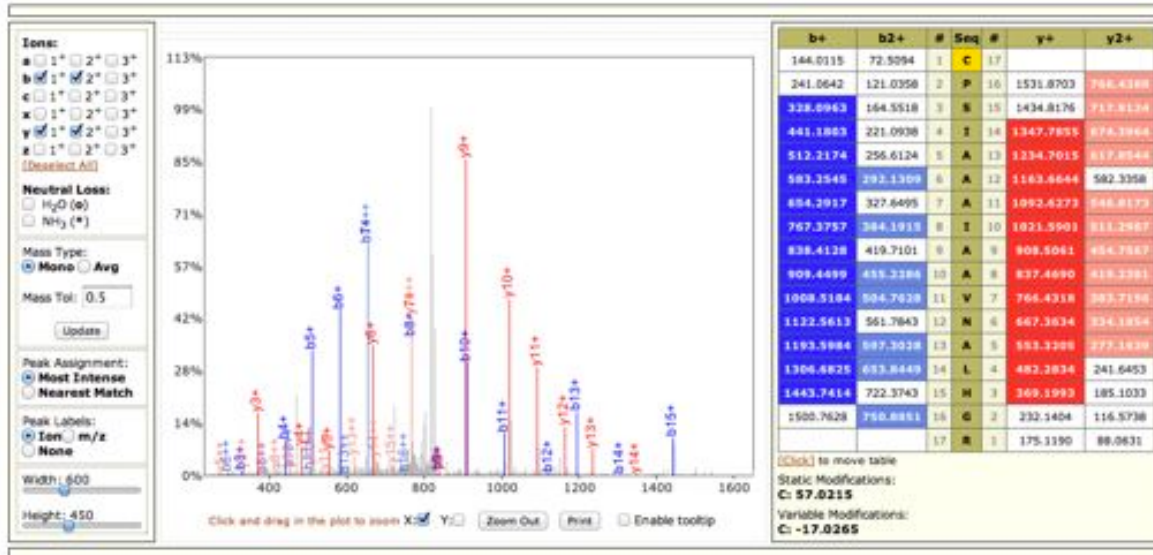

| Protein Probab. | Protein                                     | Tot. Peptides | Unique Peptides | Best Gene Name     | Scan # | Charge | Delta Mass | Peptide Prophet Score | Peptide Sequence     |
|-----------------|---------------------------------------------|---------------|-----------------|--------------------|--------|--------|------------|-----------------------|----------------------|
| 0,9870          | IPI00794777,<br>IPI00909207,<br>IPI00027350 | 1             | 1               | PRDX2, -,<br>PRDX2 | 4107   | 2+     | -0,0281    | 0,9998                | K.EGGLGPLNIPLLDVTR.R |

### Peptide Details

#### SHOW MODIFICATIONS

|                 |                      |                                                   |
|-----------------|----------------------|---------------------------------------------------|
| Scan: 4107      | Delta Mass: -0.0281  | Protein: IPI00027350                              |
| Mass: 1734.9750 | Next: 270.000        | Fraction: VF_T13h_band06.mzXML                    |
| Hyper: 536.000  | PeptideProphet: 1.00 | Run: VF_T13h_band06 pep.xml (Vitor/VF_T13h_band06 |
| Protein Hits: 3 | Ion Percent: 75%     | (VF_SILAC_AsimtWindow_NewPI_4da_Human))           |
| Charge: 2+      | B: 1.000             |                                                   |

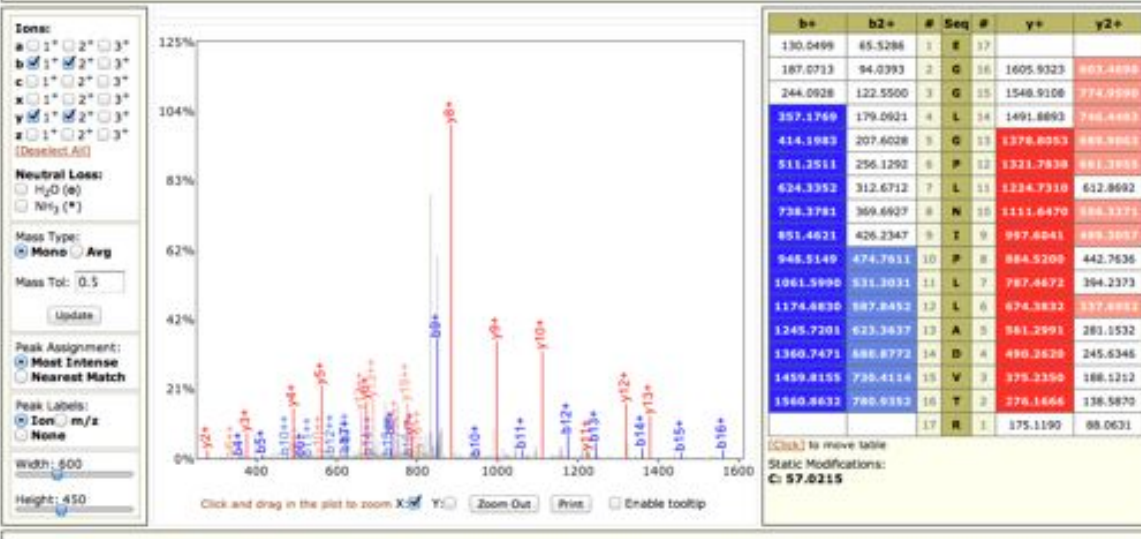

| b+        | b2+      | #  | Seq # | y+        | y2+      |
|-----------|----------|----|-------|-----------|----------|
| 130.0499  | 65.5286  | 1  | # 17  |           |          |
| 187.0713  | 94.0393  | 2  | G 16  | 1605.9323 | 803.4698 |
| 244.0928  | 122.5500 | 3  | G 15  | 1548.9108 | 774.0598 |
| 357.1769  | 179.0921 | 4  | L 14  | 1491.8893 | 746.4493 |
| 414.1983  | 207.6028 | 5  | G 13  | 1376.8953 | 689.9863 |
| 511.2511  | 256.1292 | 6  | P 12  | 1321.7939 | 661.3965 |
| 604.3352  | 312.6712 | 7  | L 11  | 1234.7319 | 612.8692 |
| 738.3781  | 369.6927 | 8  | N 10  | 1111.6470 | 564.3371 |
| 891.4621  | 426.2347 | 9  | T 9   | 997.8041  | 499.2017 |
| 948.5149  | 474.7611 | 10 | P 8   | 884.5209  | 442.7636 |
| 1061.5990 | 531.3031 | 11 | L 7   | 787.4672  | 394.2373 |
| 1174.6830 | 587.8452 | 12 | L 6   | 674.3832  | 337.8982 |
| 1245.7201 | 623.3637 | 13 | A 5   | 561.2991  | 281.0532 |
| 1360.7471 | 686.8772 | 14 | D 4   | 490.2629  | 245.6346 |
| 1459.8155 | 736.4124 | 15 | V 3   | 375.2156  | 188.1212 |
| 1540.8632 | 790.9182 | 16 | T 2   | 276.1464  | 138.5870 |
|           |          | 17 | R 1   | 175.1190  | 88.0631  |

(Click) to move table  
 Static Modifications:  
 C: 57.0215

| Protein Probab. | Protein                                                                                                                                                                     | Tot. Peptides | Unique Peptides | Best Gene Name                                                                                    | Scan # | Charge | Delta Mass | Peptide Prophet Score | Peptide Sequence      |
|-----------------|-----------------------------------------------------------------------------------------------------------------------------------------------------------------------------|---------------|-----------------|---------------------------------------------------------------------------------------------------|--------|--------|------------|-----------------------|-----------------------|
| 0,8820          | IPI00798040,<br>IPI00909011,<br>IPI00168184,<br>IPI00910732,<br>IPI00908543,<br>IPI00910814,<br>IPI00554737,<br>IPI00294178,<br>IPI00874039,<br>IPI00909316,<br>IPI00335449 | 1             | 1               | PPP2R1A,<br>-,<br>PPP2R1A,<br>-,<br>-,<br>-,<br>PPP2R1A,<br>PPP2R1B,<br>PPP2R1B,<br>-,<br>PPP2R1B | 4130   | 2+     | +0,9804    | 0,9938                | R.LNIISNLDCVNEVIGIR.Q |

### Peptide Details

#### SHOW MODIFICATIONS

|              |           |                 |         |          |                                                                                         |
|--------------|-----------|-----------------|---------|----------|-----------------------------------------------------------------------------------------|
| Scan         | 4130      | Delta Mass      | +0.9804 | Protein  | IPI00168184                                                                             |
| Mass         | 1942.0430 | Next            | 316.000 | Fraction | VF_T13h_band02.mzXML                                                                    |
| Hyper        | 477.000   | Peptide/Prophet | 0.99    | Run      | VF_T13h_band02.pep.xml (Vitor/VF_T13h_band02<br>[VF_SILAC_AssmtWindow_NewPL_4ds_Human]) |
| Protein Hits | 11        | Ion Percent     | 84%     |          |                                                                                         |
| Charge       | 2+        | B               | 1.000   |          |                                                                                         |

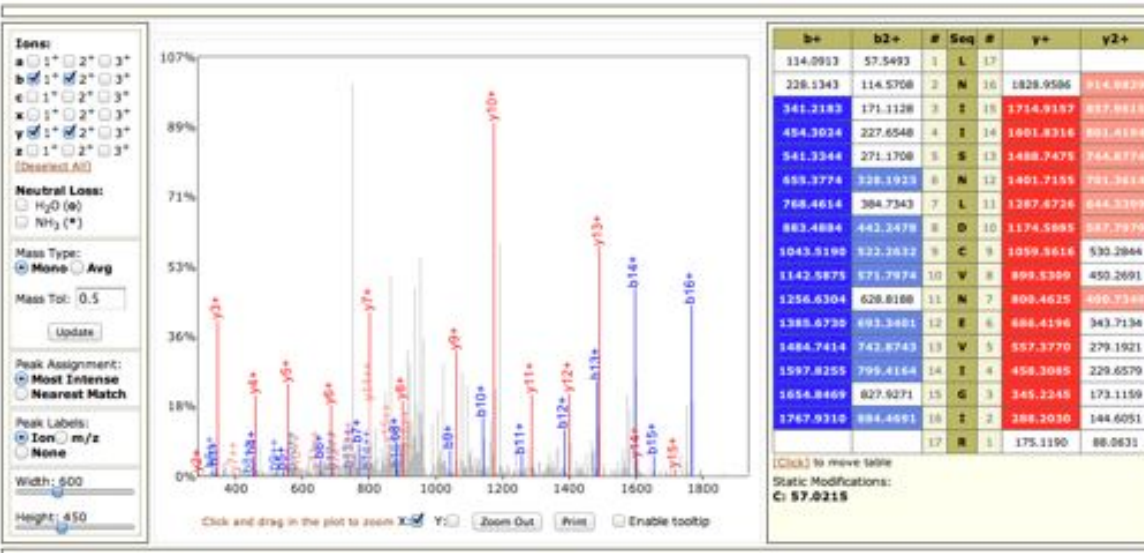

| Protein Probab. | Protein                                     | Tot. Peptides | Unique Peptides | Best Gene Name            | Scan # | Charge | Delta Mass | Peptide Prophet Score | Peptide Sequence      |
|-----------------|---------------------------------------------|---------------|-----------------|---------------------------|--------|--------|------------|-----------------------|-----------------------|
| 0,9807          | IPI00749447,<br>IPI00910838,<br>IPI00291893 | 1             | 1               | DCUN1D1,<br>-,<br>DCUN1D1 | 4132   | 2+     | -0,0231    | 0,9997                | K.LDVATDNFFQNPPLYIR.E |

Peptide Details

SHOW MODIFICATIONS :

|              |           |                 |         |          |                                              |
|--------------|-----------|-----------------|---------|----------|----------------------------------------------|
| Scan         | 4132      | Delta Mass      | -0.0231 | Protein  | IPI00291893                                  |
| Mass         | 2055.0180 | Next            | 264.000 | Fraction | VF_T13h_band04.mzXML                         |
| Hyper        | 460.000   | Peptide/Prophet | 1.00    | Run      | VF_T13h_band04.pep.xml [Vitor/VF_T13h_band04 |
| Protein Hits | 3         | Ion Percent     | 66%     |          | (VF_STLAC_AssmtWindow_newPL_4da_Human)]      |
| Charge       | 2+        | B               | 1.000   |          |                                              |

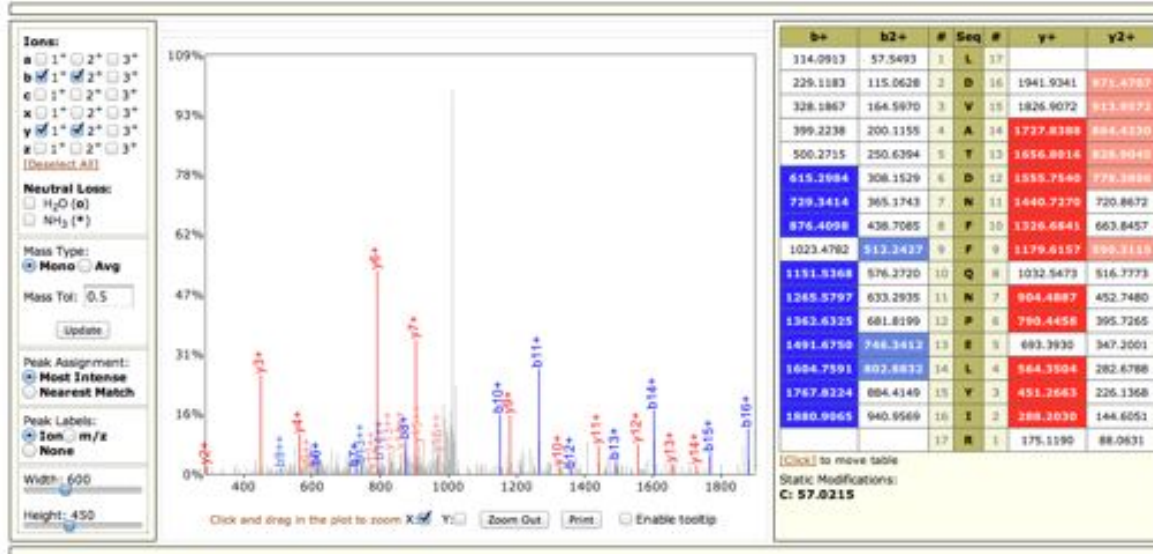

| Protein Probab. | Protein                                                     | Tot. Peptides | Unique Peptides | Best Gene Name                      | Scan # | Charge | Delta Mass | Peptide Prophet Score | Peptide Sequence       |
|-----------------|-------------------------------------------------------------|---------------|-----------------|-------------------------------------|--------|--------|------------|-----------------------|------------------------|
| 0,9877          | IPI00843773,<br>IPI00513959,<br>IPI00215801,<br>IPI00163505 | 1             | 1               | RBM39,<br>RBM39,<br>RBM39,<br>RBM39 | 4133   | 2+     | -0,0187    | 1,0000                | K.C^PSIAAAIAAVNALHGR.W |

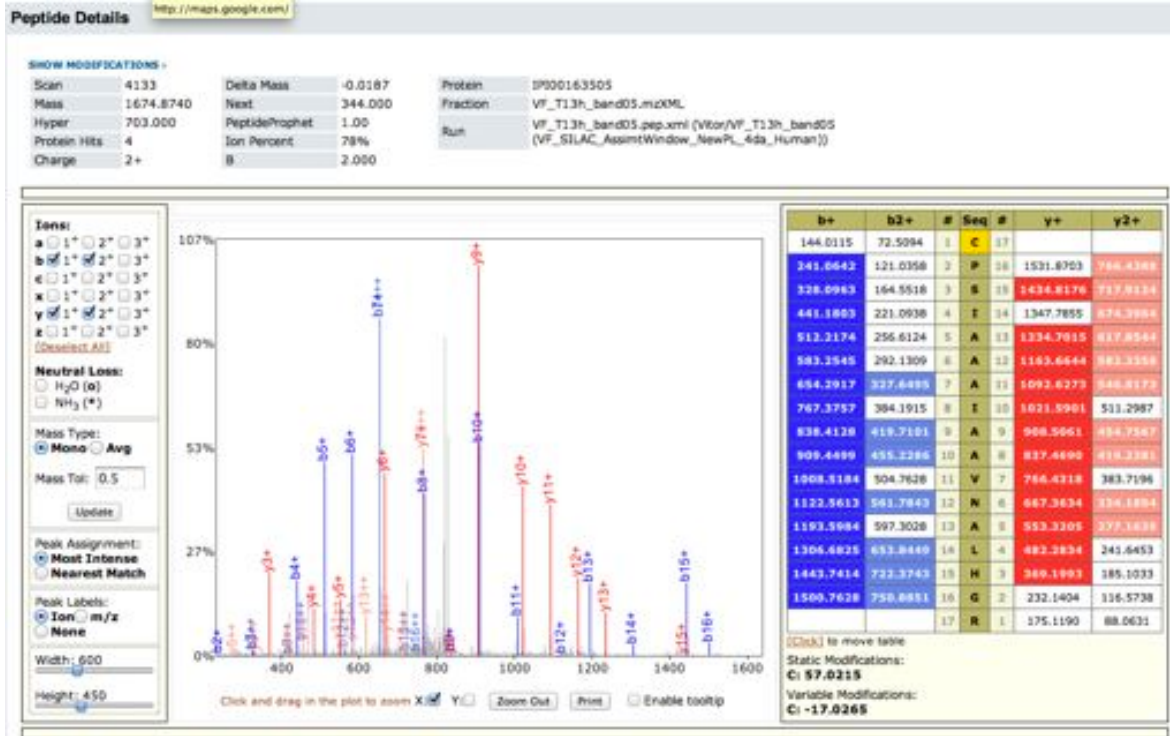

| Protein Probab. | Protein                                                                     | Tot. Peptides | Unique Peptides | Best Gene Name                                | Scan # | Charge | Delta Mass | Peptide Prophet Score | Peptide Sequence         |
|-----------------|-----------------------------------------------------------------------------|---------------|-----------------|-----------------------------------------------|--------|--------|------------|-----------------------|--------------------------|
| 0,9793          | IPI00236575,<br>IPI00216423,<br>IPI00892957,<br>IPI00396534,<br>IPI00414027 | 1             | 1               | ITSN2,<br>ITSN2,<br>ITSN2,<br>ITSN2,<br>ITSN2 | 4151   | 2+     | -0,0208    | 0,9998                | K.AGQPLPLTLPPPELVPPSFR.G |

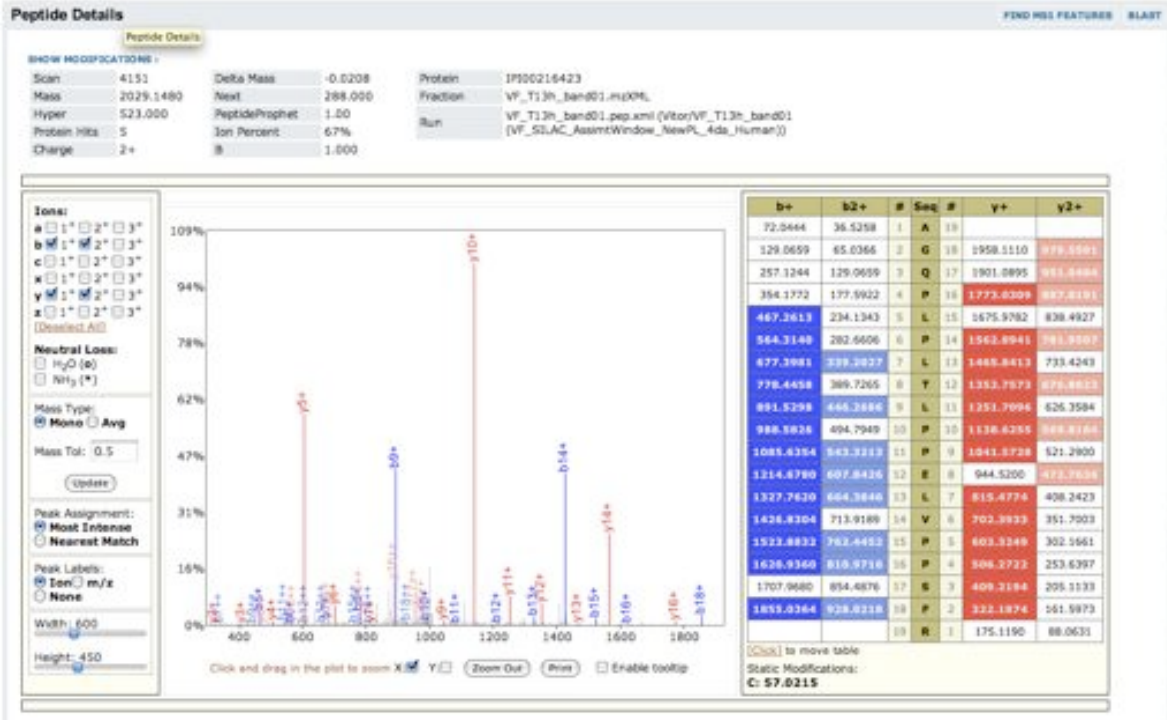



| Protein Probab. | Protein                                     | Tot. Peptides | Unique Peptides | Best Gene Name                    | Scan # | Charge | Delta Mass | Peptide Prophet Score | Peptide Sequence       |
|-----------------|---------------------------------------------|---------------|-----------------|-----------------------------------|--------|--------|------------|-----------------------|------------------------|
| 0,9230          | IPI00059718,<br>IPI00783197,<br>IPI00177856 | 1             | 1               | C14orf172,<br>TRM61,<br>C14orf172 | 4166   | 2+     | +0,9781    | 0,9955                | R.GFSELSTLEVLPQVYNVR.T |

Peptide Details

SHOW MODIFICATIONS:

|              |           |                 |         |          |                                              |
|--------------|-----------|-----------------|---------|----------|----------------------------------------------|
| Scan         | 4166      | Delta Mass      | +0.9781 | Protein  | IPI00059718                                  |
| Mass         | 2051.6810 | Next            | 327.000 | Fraction | VF_T13h_band04.mzXML                         |
| Hyper        | 515.000   | Peptide/Prophet | 1.00    | Run      | VF_T13h_band04.pep.xml [Vitor/VF_T13h_band04 |
| Protein Hits | 3         | Son Percent     | 74%     |          | (VF_STLAC_AssmtWindow_NewPL_4da_Human)]      |
| Charge       | 2+        | B               | 1.000   |          |                                              |

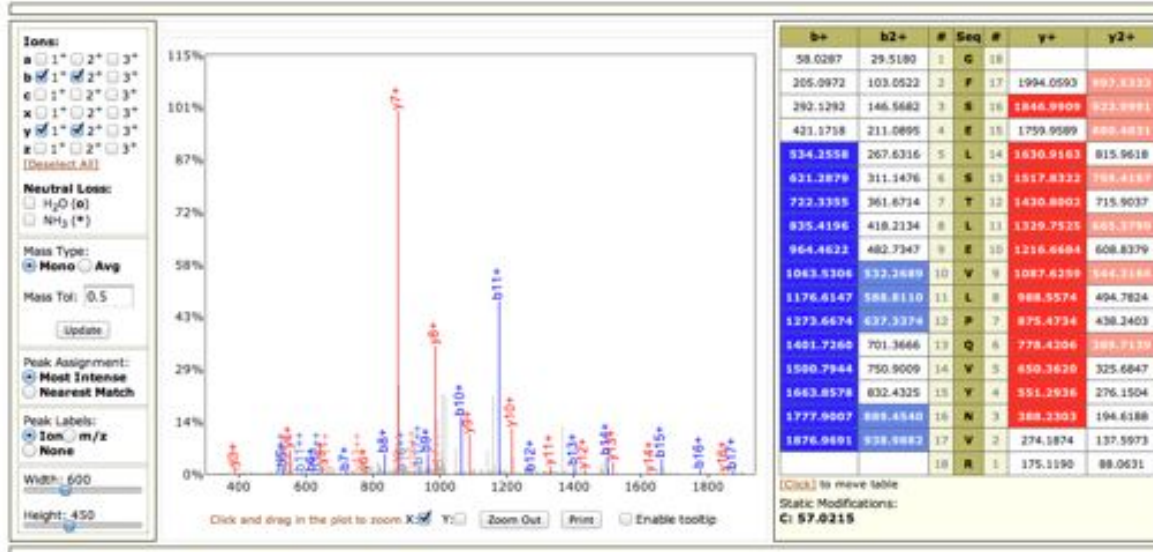

| Protein Probab. | Protein                                                                                     | Tot. Peptides | Unique Peptides | Best Gene Name                                                               | Scan # | Charge | Delta Mass | Peptide Prophet Score | Peptide Sequence   |
|-----------------|---------------------------------------------------------------------------------------------|---------------|-----------------|------------------------------------------------------------------------------|--------|--------|------------|-----------------------|--------------------|
| 0,9880          | IPI00027493,<br>IPI00554722,<br>IPI00554702,<br>IPI00604710,<br>IPI00554611,<br>IPI00554481 | 1             | 1               | SLC3A2,<br>LOC442497,<br>LOC442497,<br>LOC442497,<br>LOC442497,<br>LOC442497 | 4177   | 2+     | -0,0132    | 1,0000                | K.GQSEDPGSLLSLFR.R |

### Peptide Details

#### SHOW MODIFICATIONS

|              |           |                 |         |          |                                              |
|--------------|-----------|-----------------|---------|----------|----------------------------------------------|
| Scan         | 4177      | Delta Mass      | -0.0132 | Protein  | IPI00027493                                  |
| Mass         | 1505.7590 | Next            | 269.000 | Fraction | VF_T13h_band03.mzXML                         |
| Hyper        | 603.000   | Peptide/prophet | 1.00    | Run      | VF_T13h_band03.pep.xml (Vitor/VF_T13h_band03 |
| Protein Hits | 6         | Ion Percent     | 81%     |          | (VF_SILAC_AssimWindow_NewR_4da_Human)        |
| Charge       | 2+        | B               | 1.000   |          |                                              |

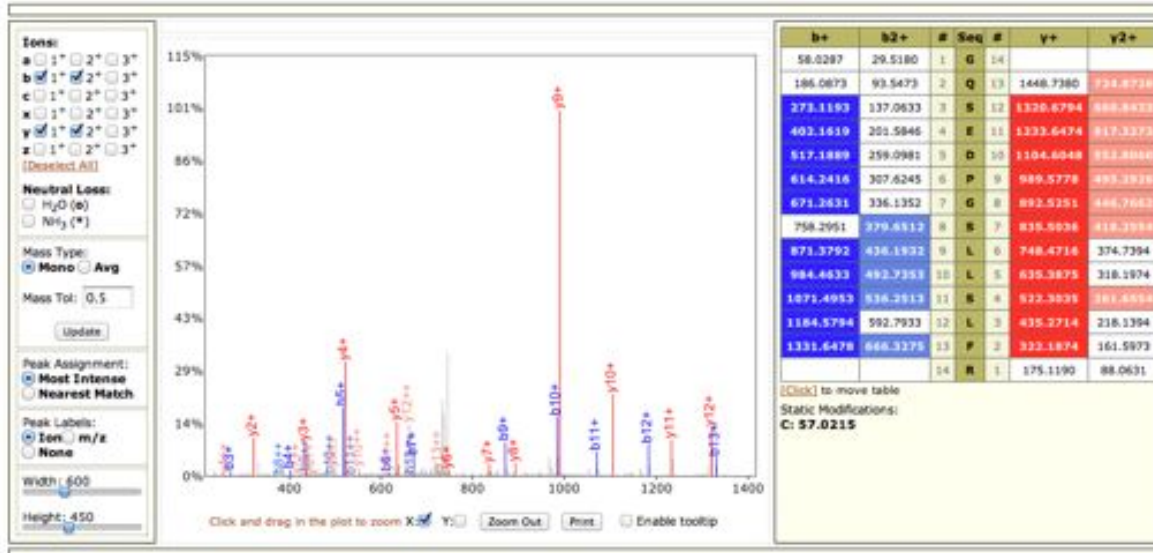

| Protein Probab. | Protein     | Tot. Peptides | Unique Peptides | Best Gene Name | Scan # | Charge | Delta Mass | Peptide Prophet Score | Peptide Sequence               |
|-----------------|-------------|---------------|-----------------|----------------|--------|--------|------------|-----------------------|--------------------------------|
| 0,9819          | IPI00019353 | 1             | 1               | FLJ10842       | 4182   | 3+     | -0,0258    | 1,0000                | K.IPIGFIPLGETSSLSHTLFAESGNK'.V |

Peptide Details

|                    |                       |                                                   |
|--------------------|-----------------------|---------------------------------------------------|
| SHOW MODIFICATIONS |                       |                                                   |
| Scan: 4182         | Delta Mass: -0.0258   | Protein: IPI00019353                              |
| Mass: 2621.3920    | Next: 350.000         | Fraction: VF_T13h_band02.mzXML                    |
| Hyper: 578.000     | Peptide/Prophet: 1.00 | Run: VF_T13h_band02.pep.xml (Vitor/VF_T13h_band02 |
| Protein Hits: 1    | Ion Percent: 59%      | Run: [VF_S3.AC_Assist/Window_New/F_46a_Human]     |
| Charge: 3+         | B: 1.000              |                                                   |

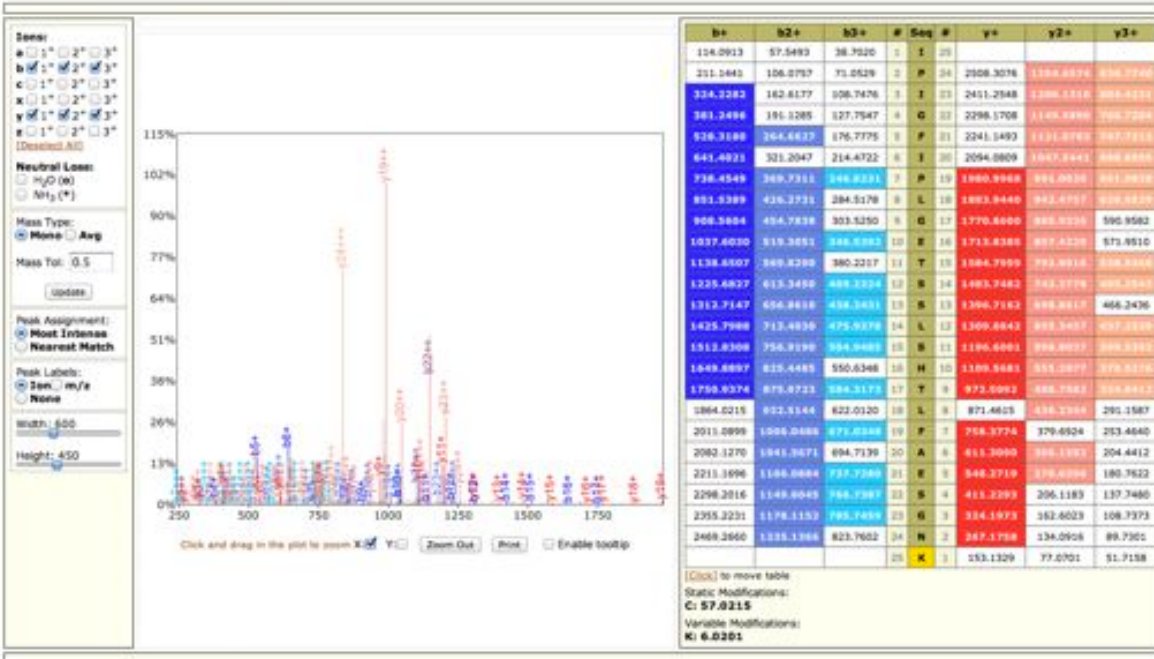

| Protein Probab. | Protein                                                     | Tot. Peptides | Unique Peptides | Best Gene Name              | Scan # | Charge | Delta Mass | Peptide Prophet Score | Peptide Sequence            |
|-----------------|-------------------------------------------------------------|---------------|-----------------|-----------------------------|--------|--------|------------|-----------------------|-----------------------------|
| 0,9852          | IP100183526,<br>IP100444262,<br>IP100827674,<br>IP100604620 | 1             | 1               | NCL,<br>NCL,<br>NCL,<br>NCL | 4183   | 2+     | -0,0186    | 0,9998                | K.TLVLSNLSYSATEETLQEVFEK'.A |

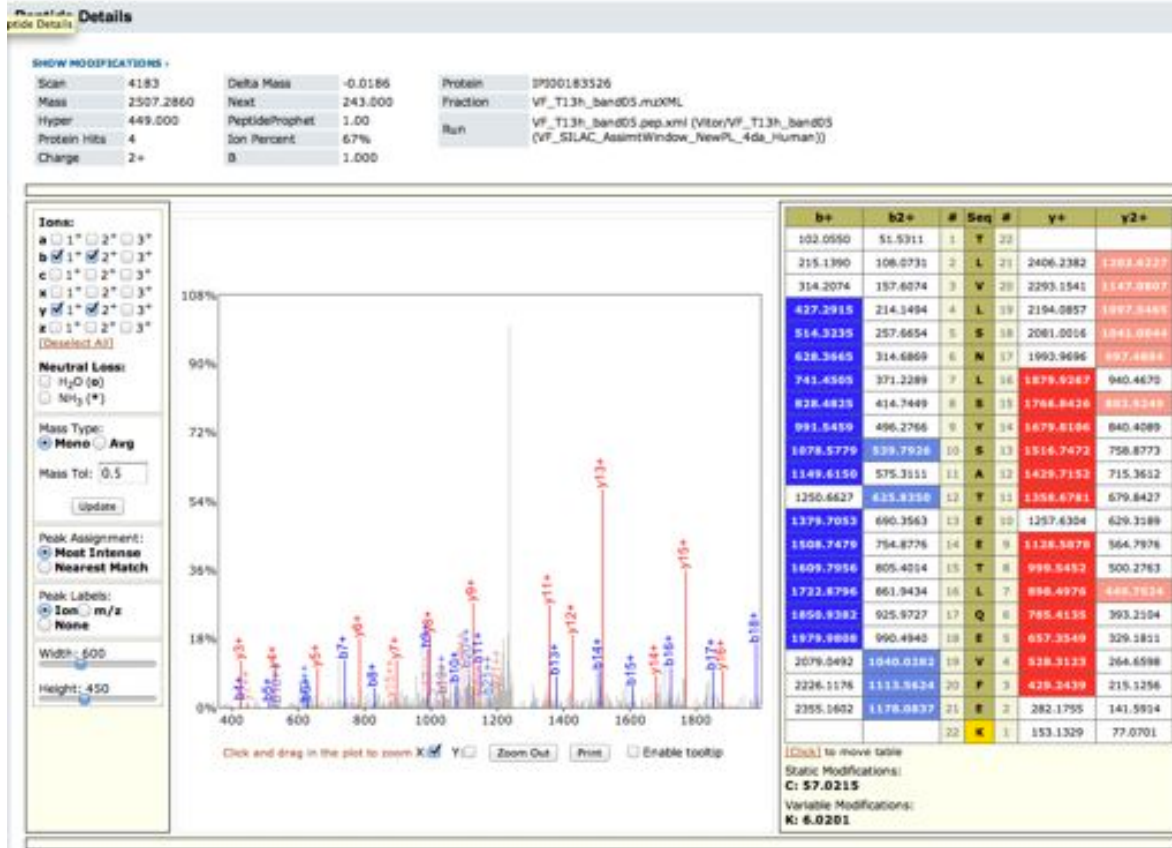

| Protein Probab. | Protein                     | Tot. Peptides | Unique Peptides | Best Gene Name | Scan # | Charge | Delta Mass | Peptide Prophet Score | Peptide Sequence   |
|-----------------|-----------------------------|---------------|-----------------|----------------|--------|--------|------------|-----------------------|--------------------|
| 0,9793          | IP100644989,<br>IP100299571 | 1             | 1               | P5,<br>PDIA6   | 4190   | 2+     | -0,0157    | 0,9996                | R.TGEAIVDAALSALR.Q |

### Peptide Details

| Peptide Details |           | Protein  |                                                                                     |
|-----------------|-----------|----------|-------------------------------------------------------------------------------------|
| Scan            | 4190      | Protein  | IP00299571                                                                          |
| Mass            | 1386.7590 | Fraction | VF_T13h_band04.mzXML                                                                |
| Hyper           | 547.000   | Run      | VF_T13h_band04.pep.xml (Vitor/VF_T13h_band04 (VF_SILAC_Assim/Window_New/4da_Human)) |
| Protein Hits    | 2         |          |                                                                                     |
| Charge          | 2+        |          |                                                                                     |
| Delta Mass      | -0.0157   |          |                                                                                     |
| Next            | 363.000   |          |                                                                                     |
| Peptide/Prophet | 1.00      |          |                                                                                     |
| Ion Percent     | 62%       |          |                                                                                     |
| B               | 1.000     |          |                                                                                     |

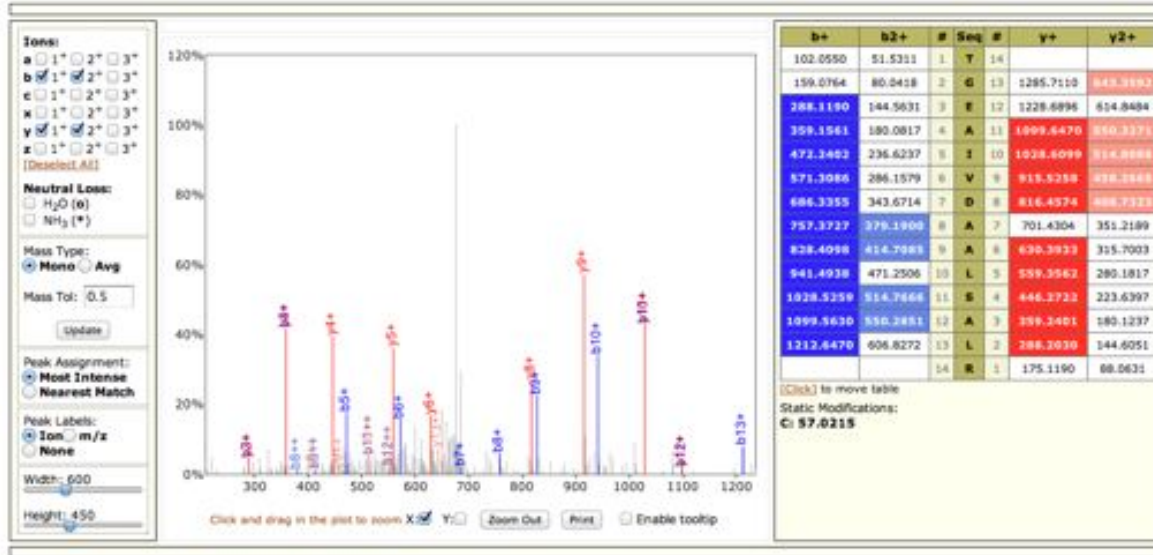

| Protein Probab. | Protein                                     | Tot. Peptides | Unique Peptides | Best Gene Name            | Scan # | Charge | Delta Mass | Peptide Prophet Score | Peptide Sequence       |
|-----------------|---------------------------------------------|---------------|-----------------|---------------------------|--------|--------|------------|-----------------------|------------------------|
| 0,9849          | IPI00062003,<br>IPI00440499,<br>IPI00030363 | 1             | 1               | ACAT1,<br>ACAT1,<br>ACAT1 | 4191   | 2+     | -0,0256    | 0,9996                | R.TPIGSFLGSLSLLPATK'.L |

### Peptide Details

#### SHOW MODIFICATIONS :

|              |           |                 |         |          |                                                                                         |
|--------------|-----------|-----------------|---------|----------|-----------------------------------------------------------------------------------------|
| Scan         | 4191      | Delta Mass      | -0.0256 | Protein  | IPI00030363                                                                             |
| Mass         | 1707.9990 | Next            | 292.000 | Fraction | VF_T13h_band06.mzXML                                                                    |
| Hyper        | 501.000   | Peptide/Prophet | 1.00    | Run      | VF_T13h_band06.pep.xml (Vitor/VF_T13h_band06<br>(VF_SILAC_AssimWindow_NewPL_4da_Human)) |
| Protein Hits | 3         | Ion Percent     | 81%     |          |                                                                                         |
| Charge       | 2+        | B               | 1.000   |          |                                                                                         |

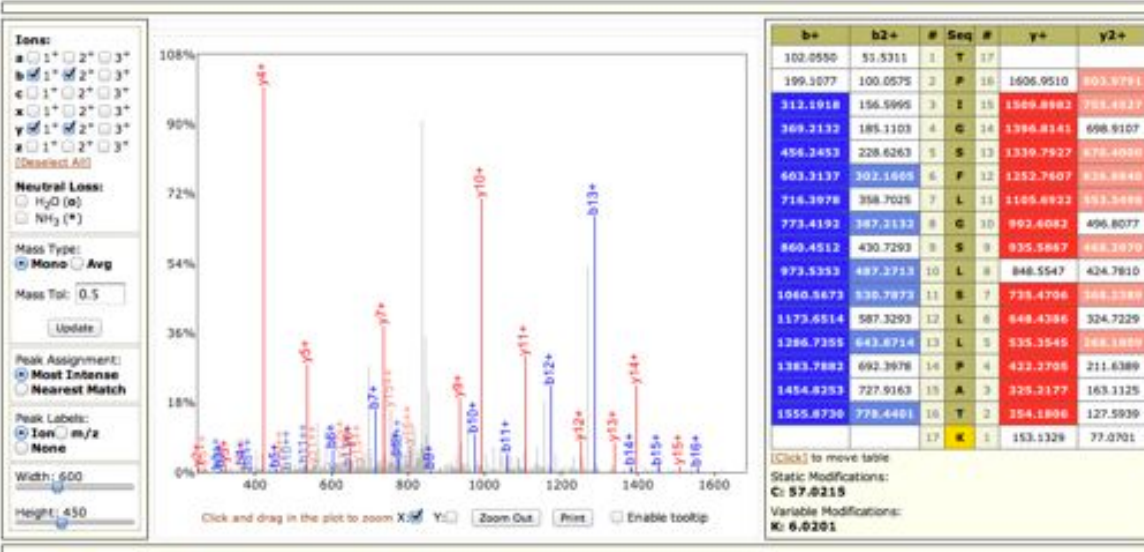

| Protein Probab. | Protein     | Tot. Peptides | Unique Peptides | Best Gene Name | Scan # | Charge | Delta Mass | Peptide Prophet Score | Peptide Sequence             |
|-----------------|-------------|---------------|-----------------|----------------|--------|--------|------------|-----------------------|------------------------------|
| 0,9880          | IPI00029264 | 1             | 1               | CYC1           | 4196   | 2+     | -0,0352    | 1,0000                | R.HGGEDYVFSLLTGYCEPPTGVSLR.E |

Peptide Details

SHOW MODIFICATIONS

|              |           |                |         |          |                                              |
|--------------|-----------|----------------|---------|----------|----------------------------------------------|
| Scan         | 4196      | Delta Mass     | -0.0352 | Protein  | IPI00029264                                  |
| Mass         | 2654.2560 | Next           | 285.000 | Fraction | VF_T13h_band03.mzXML                         |
| Hyper        | 661.000   | PeptideProphet | 1.00    | Run      | VF_T13h_band03.pep.xml (Vitor/VF_T13h_band03 |
| Protein Hits | 1         | Ion Percent    | 61%     |          | (VF_SILAC_AssayWindow_NewPL_4da_Human))      |
| Charge       | 2+        | S              | 1.000   |          |                                              |

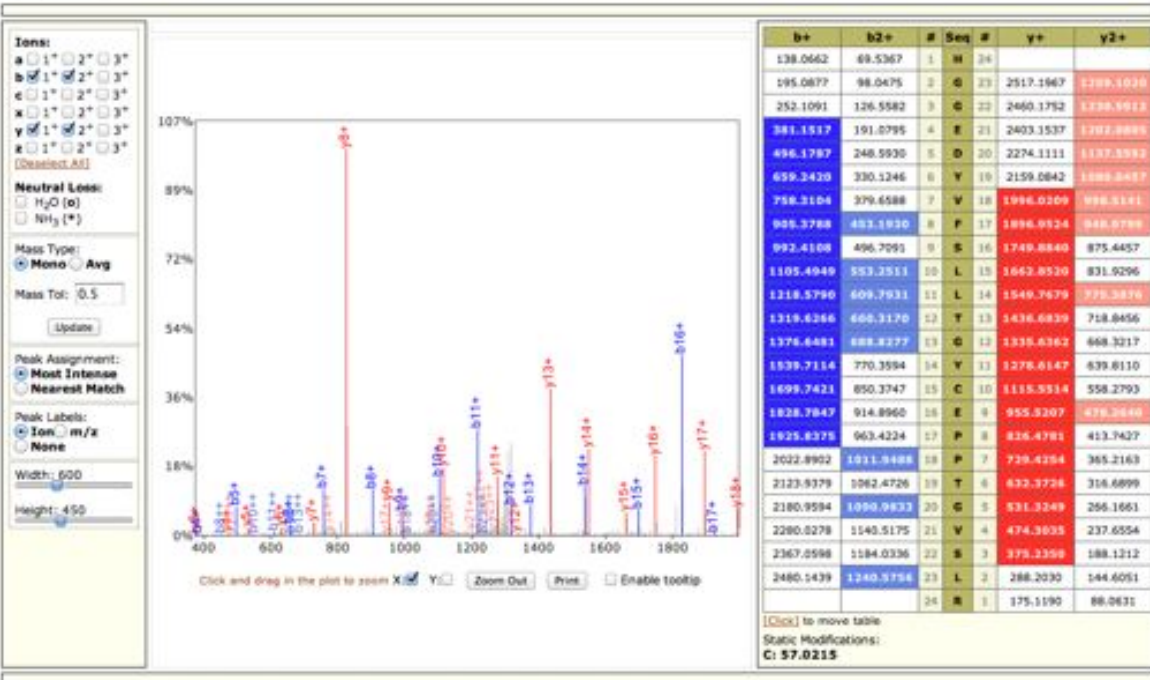

| Protein Probab. | Protein                     | Tot. Peptides | Unique Peptides | Best Gene Name | Scan # | Charge | Delta Mass | Peptide Prophet Score | Peptide Sequence      |
|-----------------|-----------------------------|---------------|-----------------|----------------|--------|--------|------------|-----------------------|-----------------------|
| 0,9837          | IP100442863,<br>IP100012442 | 1             | 1               | G3BP1,<br>G3BP | 4198   | 2+     | -0,0012    | 0,9999                | K.LPNFGFVVFDDSEPQK'.V |

### Peptide Details

#### SHOW MODIFICATIONS

|              |           |                |         |          |                                                                                          |
|--------------|-----------|----------------|---------|----------|------------------------------------------------------------------------------------------|
| Scan         | 4198      | Delta Mass     | -0.0012 | Protein  | IP00012442                                                                               |
| Mass         | 1943.9845 | Next           | 218.000 | Fraction | VF_T13h_band04.mz04L                                                                     |
| Hyper        | 472.000   | PeptideProphet | 1.00    | Run      | VF_T13h_band04 pep.xml (Vitor/VF_T13h_band04<br>(VF_SILAC_AssimtWindow_NewPt_4da_Human)) |
| Protein Hits | 2         | Ion Percent    | 88%     |          |                                                                                          |
| Charge       | 2+        | B              | 1.000   |          |                                                                                          |

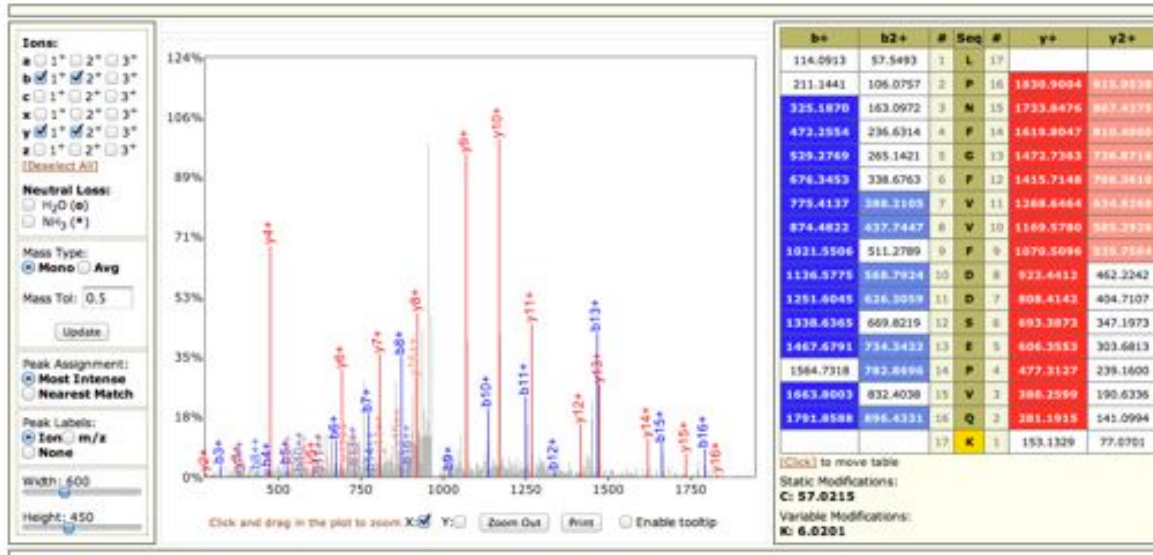





| Protein Probab. | Protein                                                                                                                                                                                     | Tot. Peptides | Unique Peptides | Best Gene Name                                                                                                              | Scan # | Charge | Delta Mass | Peptide Prophet Score | Peptide Sequence       |
|-----------------|---------------------------------------------------------------------------------------------------------------------------------------------------------------------------------------------|---------------|-----------------|-----------------------------------------------------------------------------------------------------------------------------|--------|--------|------------|-----------------------|------------------------|
| 0,9880          | IPI00848150,<br>IPI00909140,<br>IPI00647896,<br>IPI00640115,<br>IPI00645452,<br>IPI00011654,<br>IPI00007752,<br>IPI00013475,<br>IPI00031370,<br>IPI00646779,<br>IPI00013683,<br>IPI00152453 | 1             | 1               | LOC92755,<br>-,<br>TUBB,<br>TUBB3,<br>TUBB,<br>TUBB,<br>TUBB,<br>TUBB2C,<br>TUBB2A,<br>TUBB2B,<br>TUBB6,<br>TUBB3,<br>TUBB3 | 4217   | 2+     | -0,0198    | 1,0000                | K.GHYTEGAELVDSVLDVVR.K |

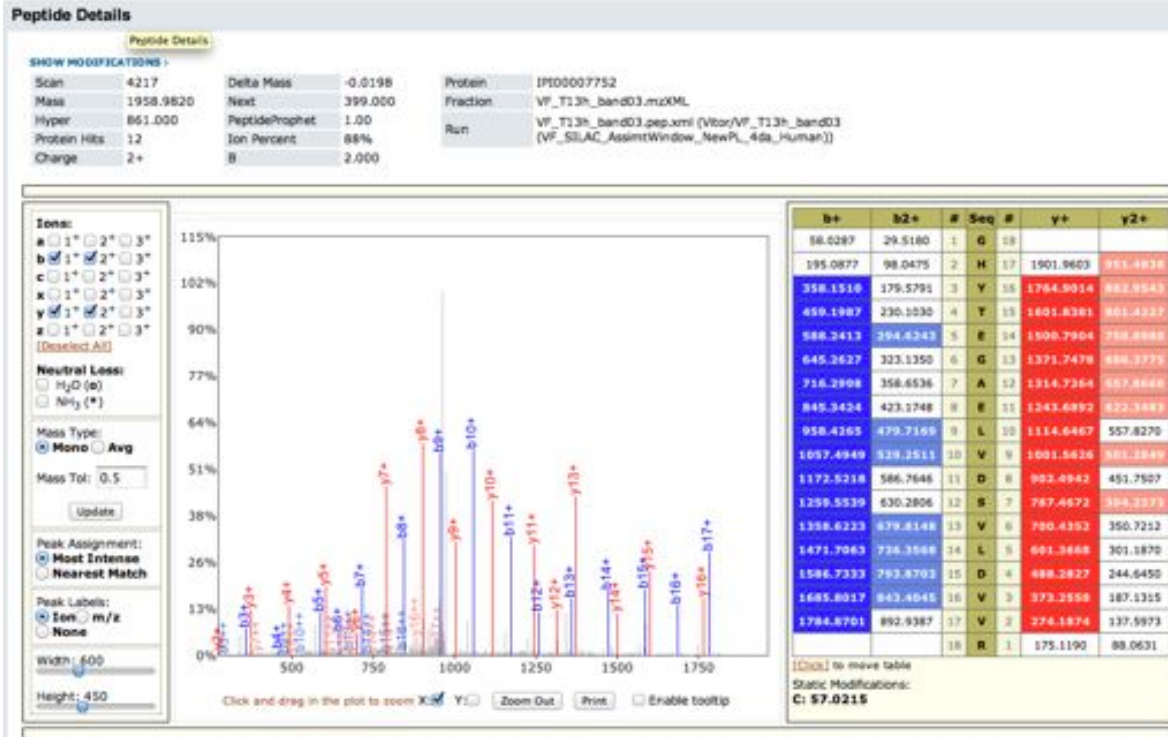

| Protein Probab. | Protein                                     | Tot. Peptides | Unique Peptides | Best Gene Name            | Scan # | Charge | Delta Mass | Peptide Prophet Score | Peptide Sequence       |
|-----------------|---------------------------------------------|---------------|-----------------|---------------------------|--------|--------|------------|-----------------------|------------------------|
| 0,9650          | IPI00062003,<br>IPI00440499,<br>IPI00030363 | 1             | 1               | ACAT1,<br>ACAT1,<br>ACAT1 | 4221   | 2+     | +0,9854    | 0,9981                | R.TPIGSFLGSLSLLPATK'.L |

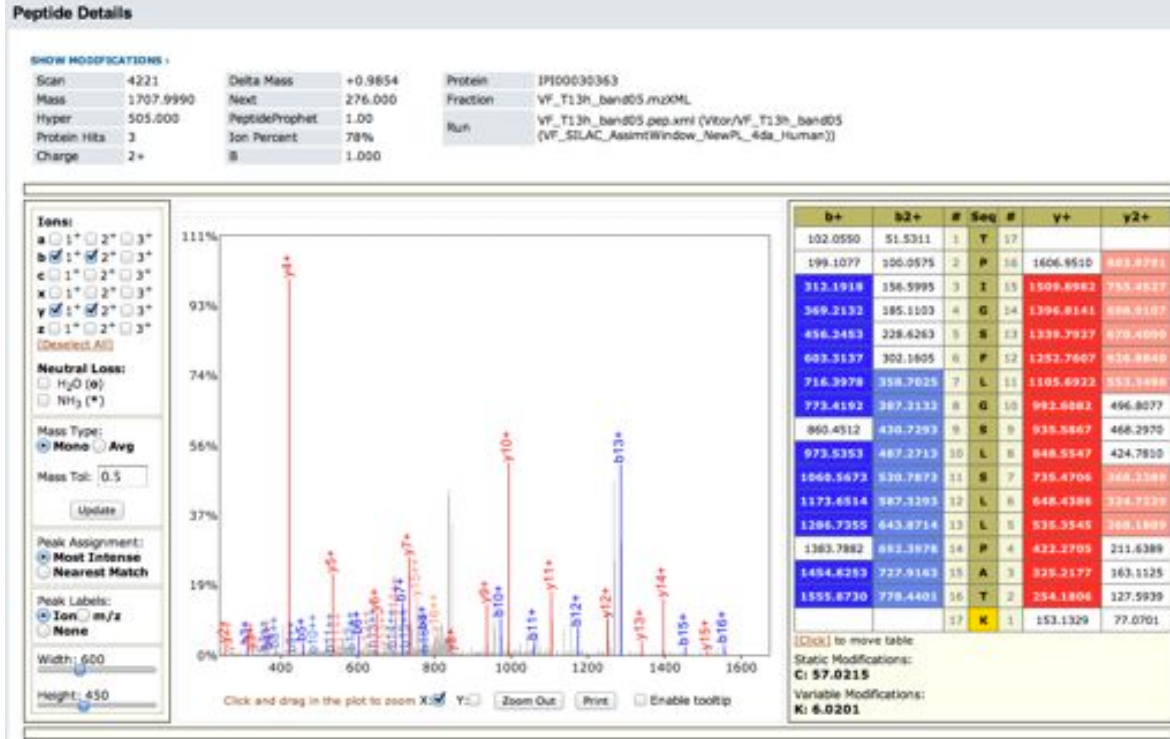

| Protein Probab. | Protein     | Tot. Peptides | Unique Peptides | Best Gene Name | Scan # | Charge | Delta Mass | Peptide Prophet Score | Peptide Sequence            |
|-----------------|-------------|---------------|-----------------|----------------|--------|--------|------------|-----------------------|-----------------------------|
| 0,9817          | IPI00221224 | 1             | 1               | ANPEP          | 4223   | 2+     | +0,9826    | 0,9993                | K.DSQYEMDSEFEGELADDLAGFYR.S |

### Peptide Details

#### SHOW MODIFICATIONS

|              |           |                |         |          |                                                |
|--------------|-----------|----------------|---------|----------|------------------------------------------------|
| Scan         | 4223      | Delta Mass     | +0.9826 | Protein  | IPI00221224                                    |
| Mass         | 2687.1090 | Next           | 309.000 | Fraction | VF_T1.3h_band06.mzXML                          |
| Hyper        | 764.000   | PeptideProphet | 1.00    | Run      | VF_T1.3h_band06.pep.xml (Vitor/VF_T1.3h_band06 |
| Protein Hits | 1         | Ion Percent    | 59%     |          | (VF_SILAC_AssmtWindow_NewR_4da_Human))         |
| Charge       | 2+        | B              | 1.000   |          |                                                |

#### Ions:

- 1<sup>+</sup>  2<sup>+</sup>  3<sup>+</sup>  
 1<sup>+</sup>  2<sup>+</sup>  3<sup>+</sup>

#### Neutral Loss:

- H<sub>2</sub>O (0)  
 NH<sub>3</sub> (\*)

#### Mass Type:

- Mono  Avg

Mass Tol: 0.5

#### Peak Assignment:

- Most Intense  Nearest Match

#### Peak Labels:

- Ion  m/z  None

Width: 600

Height: 450

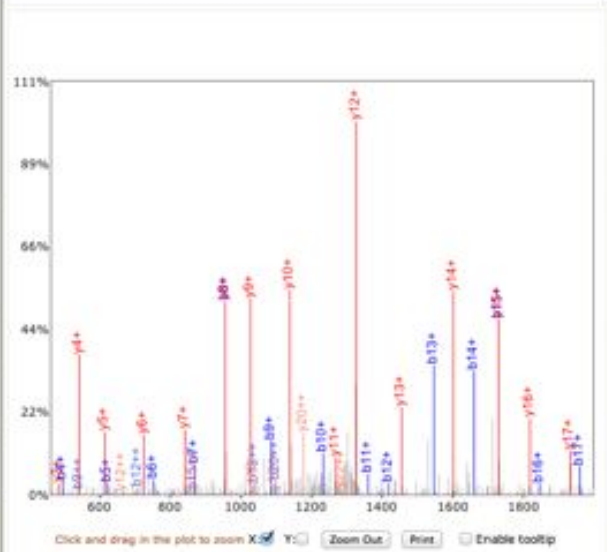

Click and drag in the plot to zoom X:  Y:     Enable tooltip

| b+        | b2+       | #  | Seq | #  | y+        | y2+       |
|-----------|-----------|----|-----|----|-----------|-----------|
| 116.0342  | 56.5207   | 1  | D   | 23 |           |           |
| 203.0652  | 102.0368  | 2  | S   | 22 | 2572.0820 | 1196.5447 |
| 331.1248  | 166.0661  | 3  | Q   | 21 | 2485.0500 | 1243.0286 |
| 484.1883  | 247.5977  | 4  | Y   | 20 | 2356.9914 | 1178.8984 |
| 623.2307  | 312.1190  | 5  | E   | 19 | 2193.9281 | 1057.8677 |
| 754.2712  | 377.6393  | 6  | M   | 18 | 2064.8855 | 1033.8464 |
| 869.2982  | 435.1527  | 7  | D   | 17 | 1933.8459 | 967.4262  |
| 956.3303  | 478.6687  | 8  | N   | 16 | 1818.8181 | 909.9127  |
| 1089.3728 | 543.1800  | 9  | E   | 15 | 1731.7861 | 860.3967  |
| 1232.4413 | 616.7242  | 10 | F   | 14 | 1602.7439 | 801.8794  |
| 1361.4838 | 681.2455  | 11 | E   | 13 | 1455.6790 | 728.3412  |
| 1418.5953 | 709.7563  | 12 | D   | 12 | 1326.6325 | 663.8199  |
| 1547.5479 | 774.2776  | 13 | E   | 11 | 1209.6118 | 625.3091  |
| 1660.6319 | 830.8196  | 14 | L   | 10 | 1140.5884 | 570.7878  |
| 1731.6880 | 886.3382  | 15 | A   | 9  | 1027.4843 | 514.2458  |
| 1846.6960 | 923.8516  | 16 | D   | 8  | 956.4472  | 478.7272  |
| 1961.7229 | 981.3651  | 17 | D   | 7  | 841.4203  | 421.2138  |
| 2074.8070 | 1037.9071 | 18 | L   | 6  | 726.3633  | 363.7003  |
| 2145.8441 | 1073.4257 | 19 | A   | 5  | 613.3093  | 307.1583  |
| 2202.8656 | 1101.9364 | 20 | G   | 4  | 543.2723  | 275.6397  |
| 2349.9340 | 1175.4704 | 21 | F   | 3  | 485.2507  | 243.1290  |
| 2512.9973 | 1257.0023 | 22 | Y   | 2  | 336.1823  | 169.5948  |
|           |           | 23 | R   | 1  | 175.1190  | 88.0621   |

to move table

Static Modifications:

C: 57.0215

| Protein Probab. | Protein                                     | Tot. Peptides | Unique Peptides | Best Gene Name               | Scan # | Charge | Delta Mass | Peptide Prophet Score | Peptide Sequence     |
|-----------------|---------------------------------------------|---------------|-----------------|------------------------------|--------|--------|------------|-----------------------|----------------------|
| 0,9546          | IPI00220556,<br>IPI00645060,<br>IPI00332106 | 1             | 1               | PBXIP1,<br>PBXIP1,<br>PBXIP1 | 4225   | 2+     | -0,0222    | 0,9983                | K.ELPLSPAFFGEDGIFR.H |

Peptide Details FIND MS1 FEATURES

SHOW MODIFICATIONS -

|              |           |                 |         |          |                                                                                         |
|--------------|-----------|-----------------|---------|----------|-----------------------------------------------------------------------------------------|
| Scan         | 4225      | Delta Mass      | -0.0222 | Protein  | IPI00220556                                                                             |
| Mass         | 1794.9060 | Next            | 265.000 | Fraction | VF_T13h_band01.mzXML                                                                    |
| Hyper        | 409.000   | Peptide/Prophet | 1.00    | Run      | VF_T13h_band01.pep.xml (Vitor/VF_T13h_band01<br>(VF_SILAC_AssimWindow_NewPI_4da_Human)) |
| Protein Hits | 3         | Ion Percent     | 83%     |          |                                                                                         |
| Charge       | 2+        | B               | 1.000   |          |                                                                                         |

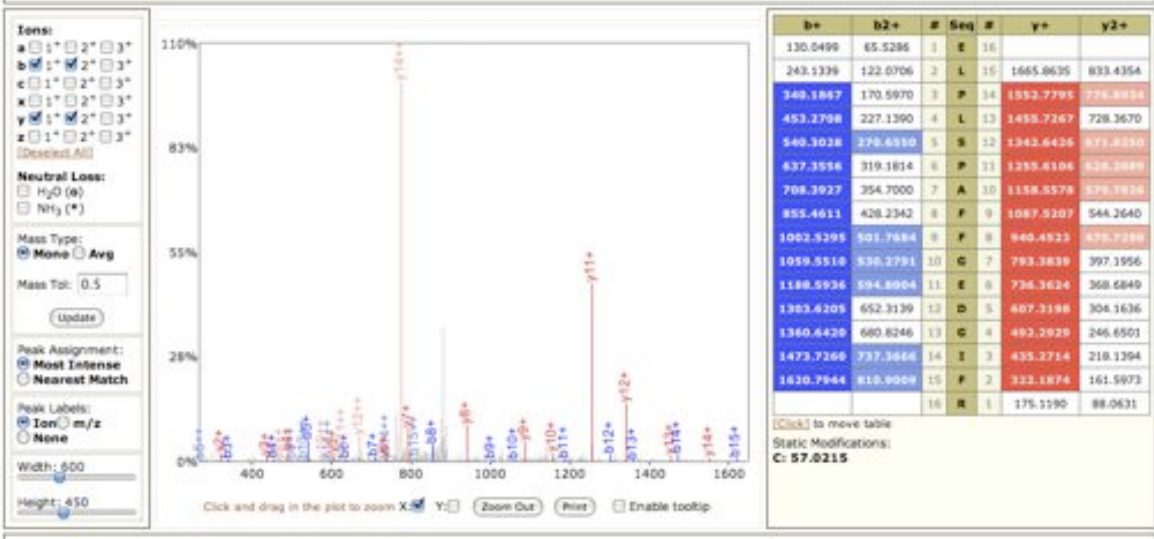

| Protein Probab. | Protein     | Tot. Peptides | Unique Peptides | Best Gene Name | Scan # | Charge | Delta Mass | Peptide Prophet Score | Peptide Sequence        |
|-----------------|-------------|---------------|-----------------|----------------|--------|--------|------------|-----------------------|-------------------------|
| 0,9322          | IPI00031064 | 1             | 1               | TMEM126A       | 4226   | 2+     | +1,0055    | 0,9944                | R.IAAGLPMAGIPFLTTLTYR.C |

### Peptide Details

#### SHOW MODIFICATIONS -

|              |           |                |         |          |                                                                                     |
|--------------|-----------|----------------|---------|----------|-------------------------------------------------------------------------------------|
| Scan         | 4226      | Delta Mass     | +1,0055 | Protein  | IP00031064                                                                          |
| Mass         | 2121,1410 | Next           | 305,000 | Fraction | VF_T13h_band06.mzXML                                                                |
| Hyper        | 578,000   | PeptideProphet | 0,99    | Run      | VF_T13h_band06.pep.xml (Vfor/VF_T13h_band06 (VF_SILAC_AssmtWindow_NewPI_4da_Human)) |
| Protein Hits | 1         | Ion Percent    | 68%     |          |                                                                                     |
| Charge       | 2+        | B              | 1,000   |          |                                                                                     |

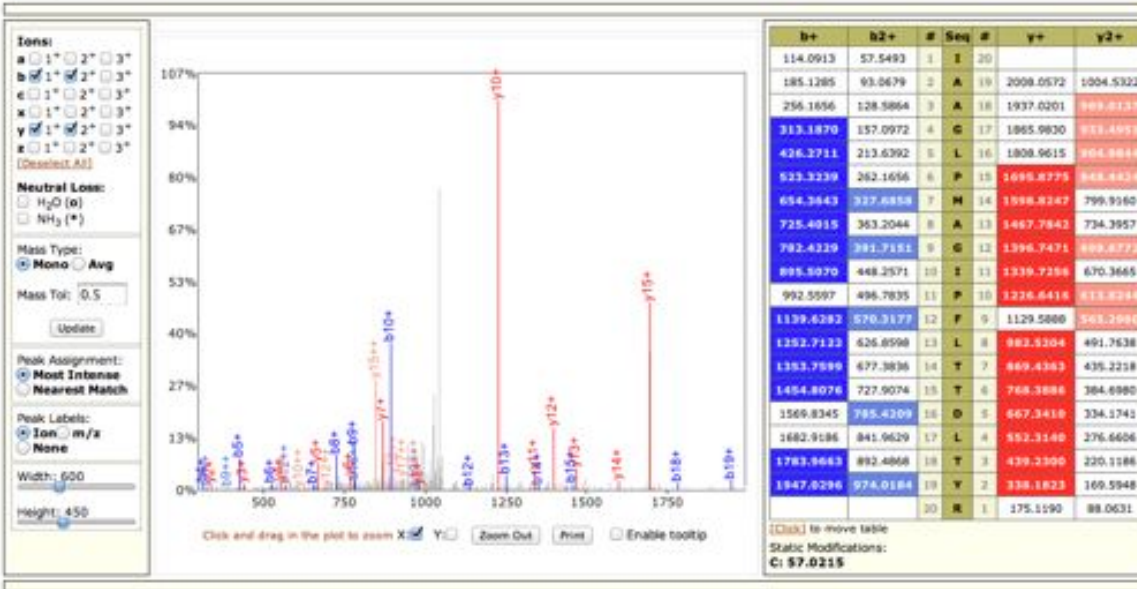

| Protein Probab. | Protein                     | Tot. Peptides | Unique Peptides | Best Gene Name | Scan # | Charge | Delta Mass | Peptide Prophet Score | Peptide Sequence    |
|-----------------|-----------------------------|---------------|-----------------|----------------|--------|--------|------------|-----------------------|---------------------|
| 0,9869          | IPI00019912,<br>IPI00909582 | 1             | 1               | HSD17B4,<br>-  | 4230   | 2+     | -0,0162    | 0,9999                | K.LGLLGLANSLAIEGR.K |

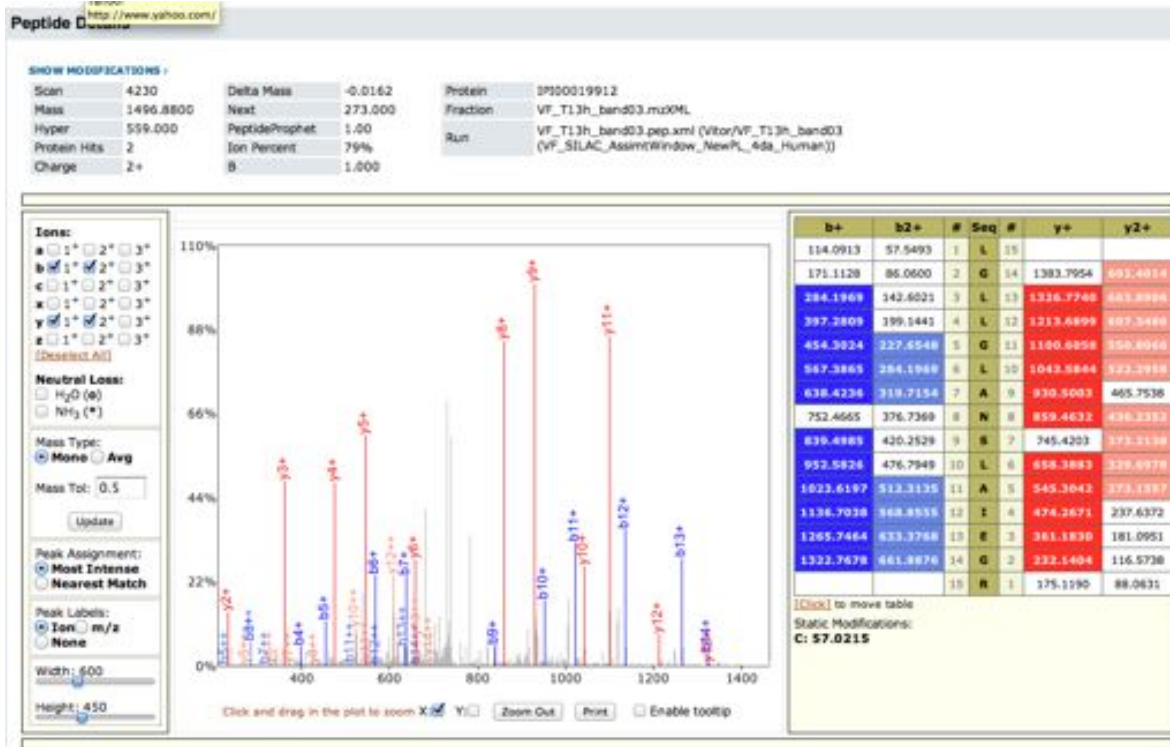

| Protein Probab. | Protein     | Tot. Peptides | Unique Peptides | Best Gene Name | Scan # | Charge | Delta Mass | Peptide Prophet Score | Peptide Sequence          |
|-----------------|-------------|---------------|-----------------|----------------|--------|--------|------------|-----------------------|---------------------------|
| 0,9833          | IPI00013122 | 1             | 1               | CDC37          | 4239   | 2+     | -0,0166    | 0,9996                | R.LGPGGLDPVEVYESLPEELQK.C |

### Peptide Details

#### SHOW MODIFICATIONS :

|              |           |                 |         |          |                                                                                      |
|--------------|-----------|-----------------|---------|----------|--------------------------------------------------------------------------------------|
| Scan         | 4239      | Delta Mass      | -0.0166 | Protein  | IPI00013122                                                                          |
| Mass         | 2269.1600 | Next            | 202.000 | Fraction | VF_T13h_band03.mzXML                                                                 |
| Hyper        | 391.000   | Peptide/Prophet | 1.00    | Run      | VF_T13h_band03.pep.xml (Vitor/VF_T13h_band03 (VF_SILAC_AssimWindow_NewPL_4da_Human)) |
| Protein Hits | 1         | Ion Percent     | 77%     |          |                                                                                      |
| Charge       | 2+        | B               | 1.000   |          |                                                                                      |

#### Ions:

- 1\*
- 2\*
- 3\*
- 1\*
- 2\*
- 3\*
- 1\*
- 2\*
- 3\*
- 1\*
- 2\*
- 3\*
- 1\*
- 2\*
- 3\*

[Deconvolt All]

#### Neutral Loss:

- H<sub>2</sub>O (a)
- NH<sub>3</sub> (\*)

#### Mass Type:

- Mono
- Avg

Mass Tol: 0.5

Update

#### Peak Assignment:

- Most Intense
- Nearest Match

#### Peak Labels:

- Ion m/z
- None

Width: 500

Height: 450

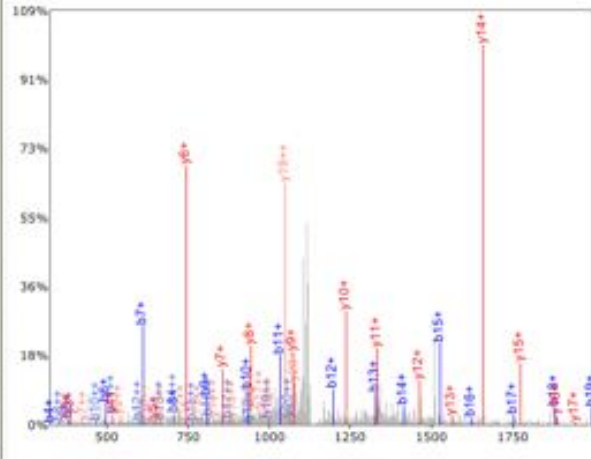

Click and drag in the plot to zoom X: Y: Zoom Out Print Enable tooltip

| b+        | b2+       | #  | Seq | #  | y+        | y2+       |
|-----------|-----------|----|-----|----|-----------|-----------|
| 154.0913  | 57.5493   | 1  | L   | 21 |           |           |
| 171.1128  | 86.0600   | 2  | G   | 20 | 2156.0798 | 1878.3419 |
| 268.1656  | 134.5864  | 3  | P   | 19 | 2099.0543 | 1855.3392 |
| 325.1879  | 163.0972  | 4  | G   | 18 | 2002.0015 | 1831.3344 |
| 382.2085  | 191.6079  | 5  | G   | 17 | 1944.9801 | 1812.3327 |
| 445.2326  | 248.1499  | 6  | L   | 16 | 1887.9586 | 1813.3329 |
| 610.3196  | 305.6634  | 7  | D   | 15 | 1774.8745 | 1827.3409 |
| 787.3723  | 354.1886  | 8  | P   | 14 | 1659.8476 | 1838.3374 |
| 886.4407  | 403.7240  | 9  | V   | 13 | 1562.7948 | 1811.3611 |
| 935.4933  | 468.2453  | 10 | E   | 12 | 1463.7264 | 1811.3618 |
| 1034.5517 | 517.7785  | 11 | V   | 11 | 1334.6838 | 1817.3495 |
| 1197.6180 | 598.2111  | 12 | V   | 10 | 1238.6154 | 1818.3313 |
| 1326.6576 | 663.8324  | 13 | E   | 9  | 1072.5821 | 1836.7797 |
| 1413.6896 | 707.3485  | 14 | S   | 8  | 943.5095  | 472.2584  |
| 1526.7737 | 763.8985  | 15 | L   | 7  | 856.4775  | 438.7424  |
| 1623.8245 | 812.4169  | 16 | P   | 6  | 743.3634  | 375.2603  |
| 1793.8691 | 876.9382  | 17 | E   | 5  | 646.3406  | 323.6740  |
| 1881.9117 | 941.4695  | 18 | E   | 4  | 517.2665  | 259.1527  |
| 1994.9557 | 998.0015  | 19 | L   | 3  | 388.2354  | 194.6314  |
| 2123.0543 | 1062.5398 | 20 | Q   | 2  | 275.1714  | 138.0893  |
|           |           | 21 | K   | 1  | 147.1128  | 74.0600   |

[Click] to move table

Static Modifications:

C: **\$7.0215**



| Protein Probab. | Protein     | Tot. Peptides | Unique Peptides | Best Gene Name | Scan # | Charge | Delta Mass | Peptide Prophet Score | Peptide Sequence         |
|-----------------|-------------|---------------|-----------------|----------------|--------|--------|------------|-----------------------|--------------------------|
| 0,9880          | IPI00024623 | 1             | 1               | ACADSB         | 4241   | 3+     | -0,0213    | 1,0000                | R.LFDFQGLQHVAHVATQLEAR.L |

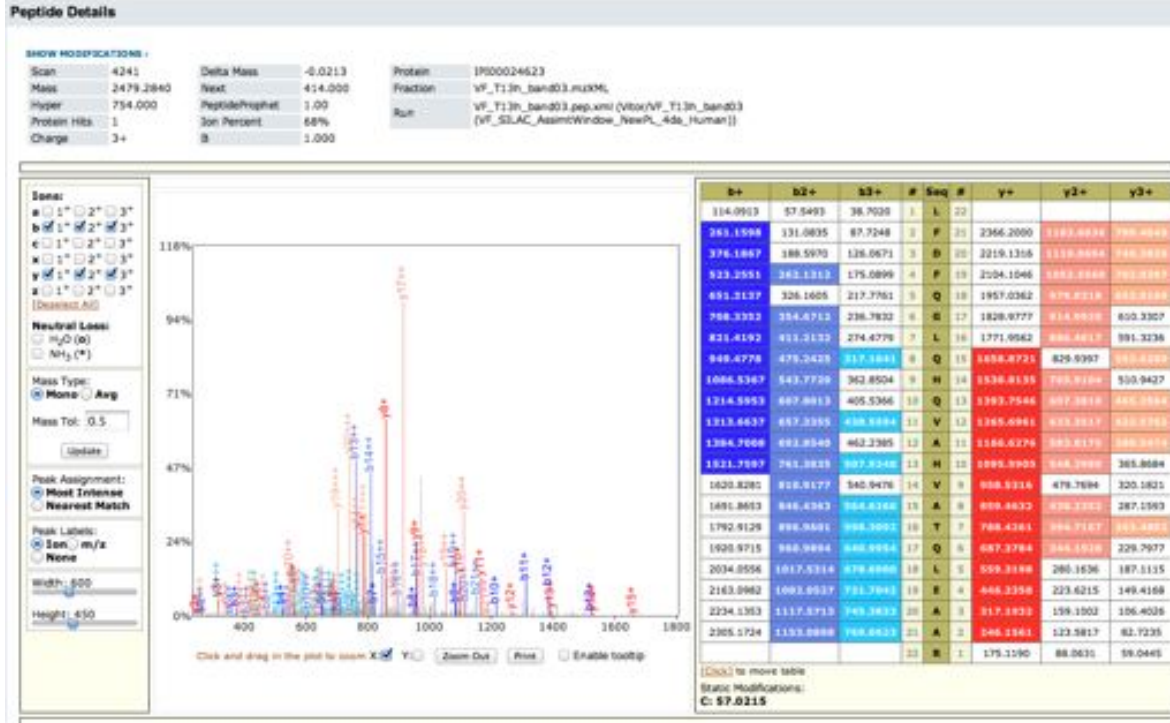

| Protein Probab. | Protein                     | Tot. Peptides | Unique Peptides | Best Gene Name | Scan # | Charge | Delta Mass | Peptide Prophet Score | Peptide Sequence    |
|-----------------|-----------------------------|---------------|-----------------|----------------|--------|--------|------------|-----------------------|---------------------|
| 0,9167          | IPI00909038,<br>IPI00328361 | 1             | 1               | -,<br>SARS2    | 4248   | 2+     | -0,0192    | 0,9961                | R.SADLPAlISTWQELR.Q |

### Peptide Details

#### SHOW MODIFICATIONS

|              |           |                 |         |          |                                                                                         |
|--------------|-----------|-----------------|---------|----------|-----------------------------------------------------------------------------------------|
| Scan         | 4248      | Delta Mass      | -0.0192 | Protein  | IPI00328361                                                                             |
| Mass         | 1699.9010 | Next            | 278.000 | Fraction | VF_T13H_band02.mz046                                                                    |
| Hyper        | 397.000   | Peptide/Prophet | 1.00    | Run      | VF_T13H_band02.pep.xml (Vitor/VF_T13H_band02<br>[VF_SILAC_AssmtWindow_NewPL_4da_Human]) |
| Protein Hits | 2         | Ion Percent     | 61%     |          |                                                                                         |
| Charge       | 2+        | B               | 1.000   |          |                                                                                         |

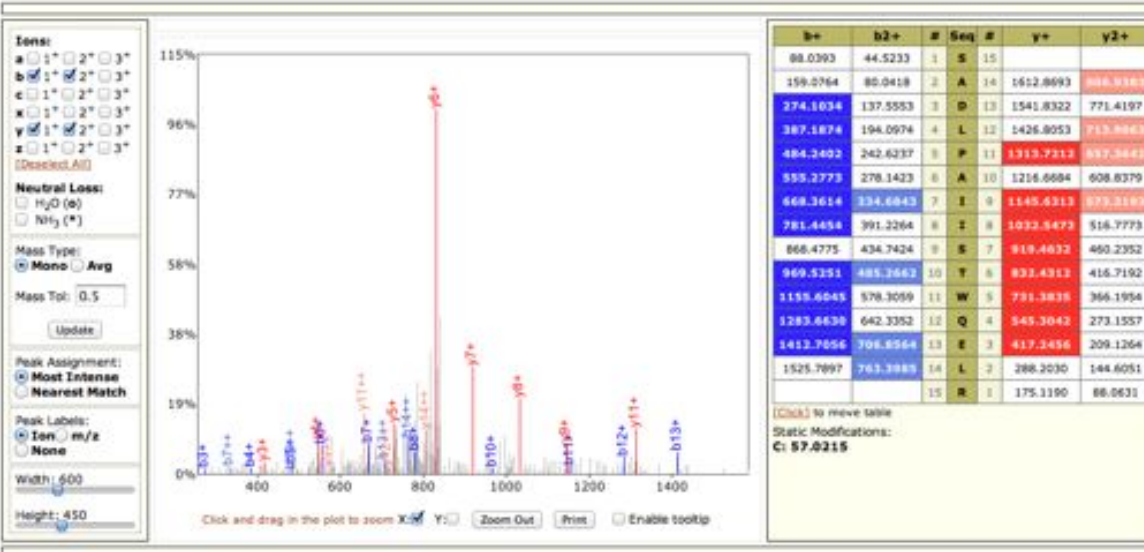

| b+        | b2+      | #  | Seq # | y+ | y2+       |
|-----------|----------|----|-------|----|-----------|
| 88.0393   | 44.5233  | 1  | S     | 15 |           |
| 159.0764  | 80.0418  | 2  | A     | 14 | 1612.8693 |
| 274.1034  | 137.5553 | 3  | D     | 13 | 1541.8322 |
| 387.1874  | 194.0974 | 4  | L     | 12 | 1426.8053 |
| 494.2402  | 242.6237 | 5  | P     | 11 | 1313.7312 |
| 595.2773  | 278.1423 | 6  | A     | 10 | 1216.6694 |
| 668.3614  | 334.6843 | 7  | I     | 9  | 1145.6313 |
| 781.4454  | 391.2264 | 8  | T     | 8  | 1032.5473 |
| 866.4775  | 434.7424 | 9  | S     | 7  | 919.4632  |
| 969.5251  | 485.2663 | 10 | T     | 6  | 831.4312  |
| 1139.6943 | 578.3059 | 11 | W     | 5  | 731.3835  |
| 1283.8639 | 642.3352 | 12 | Q     | 4  | 545.3042  |
| 1412.7856 | 701.8564 | 13 | E     | 3  | 417.2456  |
| 1525.7897 | 763.3885 | 14 | L     | 2  | 286.2030  |
|           |          | 15 | R     | 1  | 175.1190  |

[Click] to move table  
 Static Modifications:  
 C: 57.0215

| Protein Probab. | Protein     | Tot. Peptides | Unique Peptides | Best Gene Name | Scan # | Charge | Delta Mass | Peptide Prophet Score | Peptide Sequence  |
|-----------------|-------------|---------------|-----------------|----------------|--------|--------|------------|-----------------------|-------------------|
| 0,8333          | IPI00290614 | 1             | 1               | ENDOG          | 4254   | 2+     | -0,0153    | 0,9879                | R.ASGLLFVPNILAR.A |

### Peptide Details

SHOW MODIFICATIONS

|              |           |                 |         |          |                                                                                      |
|--------------|-----------|-----------------|---------|----------|--------------------------------------------------------------------------------------|
| Scan         | 4254      | Delta Mass      | -0.0153 | Protein  | IPI00290614                                                                          |
| Mass         | 1370.8150 | Neat            | 335.000 | Fraction | VF_T13h_band04.mzXML                                                                 |
| Hyper        | 413.000   | Peptide/Prophet | 0.99    | Run      | VF_T13h_band04_pep.xml (Vitor/VF_T13h_band04 (VF_SILAC_AssimrWindow_NewR_4da_Human)) |
| Protein Hits | 1         | Ion Percent     | 75%     |          |                                                                                      |
| Charge       | 2+        | B               | 1.000   |          |                                                                                      |

- Ion:
- 1<sup>+</sup>  2<sup>+</sup>  3<sup>+</sup>
  - 1<sup>+</sup>  2<sup>+</sup>  3<sup>+</sup>

- Neutral Loss:
- H<sub>2</sub>O (0)
  - NH<sub>3</sub> (\*)

- Mass Type:
- Mono
  - Avg

Mass Tol: 0.5

- Peak Assignment:
- Most Intense
  - Nearest Match

- Peak Labels:
- Ion, m/z
  - None

Width: 500

Height: 450

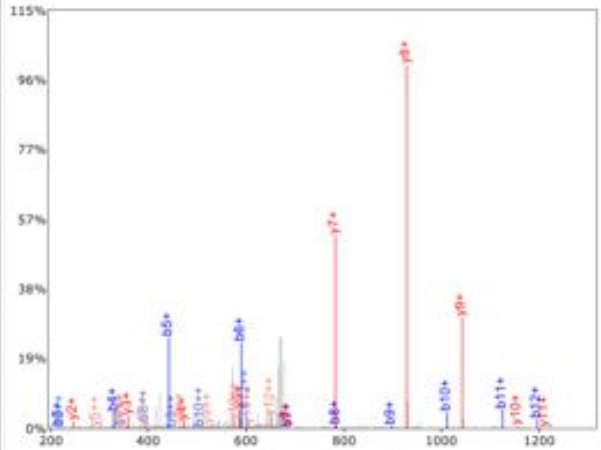

| b+        | b2+      | #  | Seq # | y+        | y2+      |
|-----------|----------|----|-------|-----------|----------|
| 72.0666   | 36.5258  | 1  | A 13  |           |          |
| 159.0764  | 80.0418  | 2  | S 12  | 1299.7763 | 650.3928 |
| 216.0979  | 108.5526 | 3  | G 11  | 1312.7463 | 606.8768 |
| 329.1819  | 165.0946 | 4  | L 10  | 1155.7249 | 578.3861 |
| 442.2660  | 221.6366 | 5  | L 9   | 1042.6408 | 531.8340 |
| 599.3344  | 295.1708 | 6  | F 8   | 929.5567  | 485.3820 |
| 688.4028  | 344.2051 | 7  | V 7   | 782.4883  | 391.7478 |
| 785.4536  | 392.2314 | 8  | P 6   | 683.4199  | 343.2126 |
| 899.4985  | 450.2529 | 9  | N 5   | 586.3671  | 293.6872 |
| 1012.5826 | 508.2749 | 10 | I 4   | 472.3242  | 236.6657 |
| 1125.6667 | 563.3070 | 11 | L 3   | 359.2401  | 180.1237 |
| 1186.7038 | 598.6335 | 12 | A 2   | 246.1981  | 123.5817 |
|           |          | 13 | R 1   | 175.1190  | 88.0631  |

[Click] to move table

Static Modifications:

C: 57.0215

| Protein Probab. | Protein                                                                                     | Tot. Peptides | Unique Peptides | Best Gene Name                                   | Scan# | Charge | Delta Mass | Peptide Prophet Score | Peptide Sequence           |
|-----------------|---------------------------------------------------------------------------------------------|---------------|-----------------|--------------------------------------------------|-------|--------|------------|-----------------------|----------------------------|
| 0,9419          | IPI00908675,<br>IPI00910178,<br>IPI00903331,<br>IPI00470467,<br>IPI00792395,<br>IPI00880028 | 1             | 1               | -,<br>-,<br>POR,<br>POR,<br>DKFZp686G04235,<br>- | 4259  | 2+     | -0,0285    | 0,9975                | R.TNVLVYELAQYASEPSEQELLR.K |

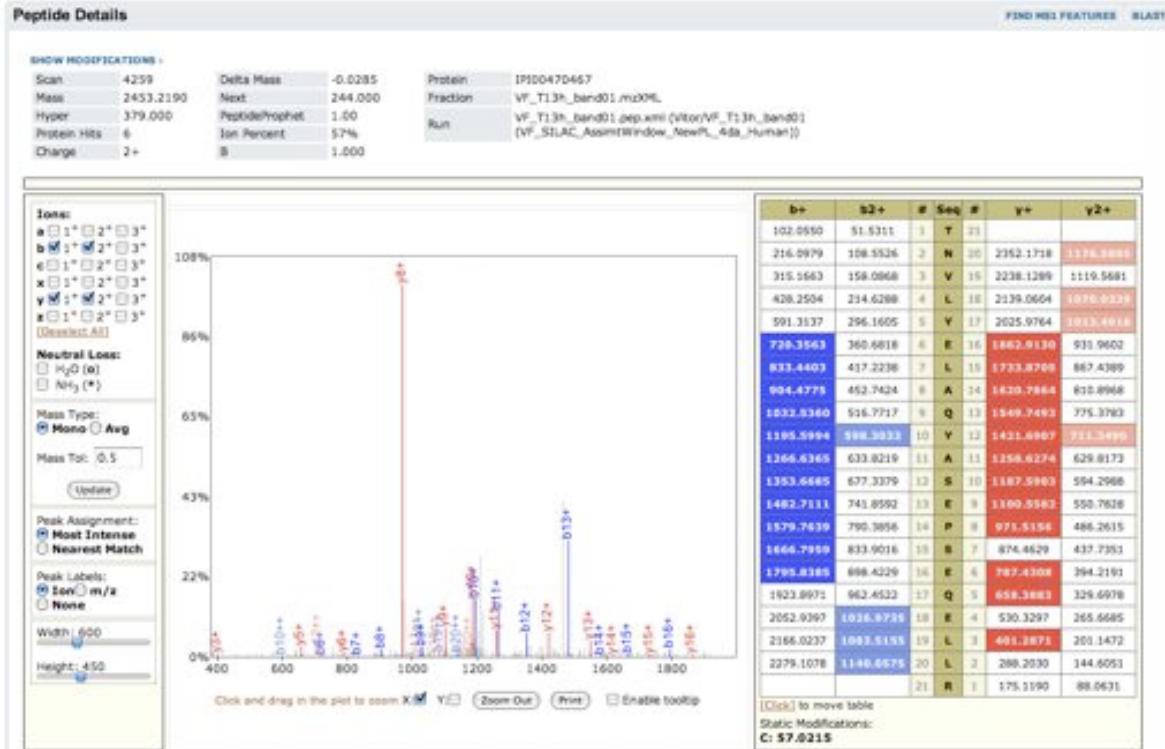



| Protein Probab. | Protein                                                     | Tot. Peptides | Unique Peptides | Best Gene Name                  | Scan # | Charge | Delta Mass | Peptide Prophet Score | Peptide Sequence  |
|-----------------|-------------------------------------------------------------|---------------|-----------------|---------------------------------|--------|--------|------------|-----------------------|-------------------|
| 0,9857          | IP100879328,<br>IP100852597,<br>IP100853455,<br>IP100011229 | 1             | 1               | CTSD,<br>CTSD,<br>CTSD,<br>CTSD | 4266   | 2+     | -0,0166    | 0,9998                | K.LVDQNIQSFYLSR.D |

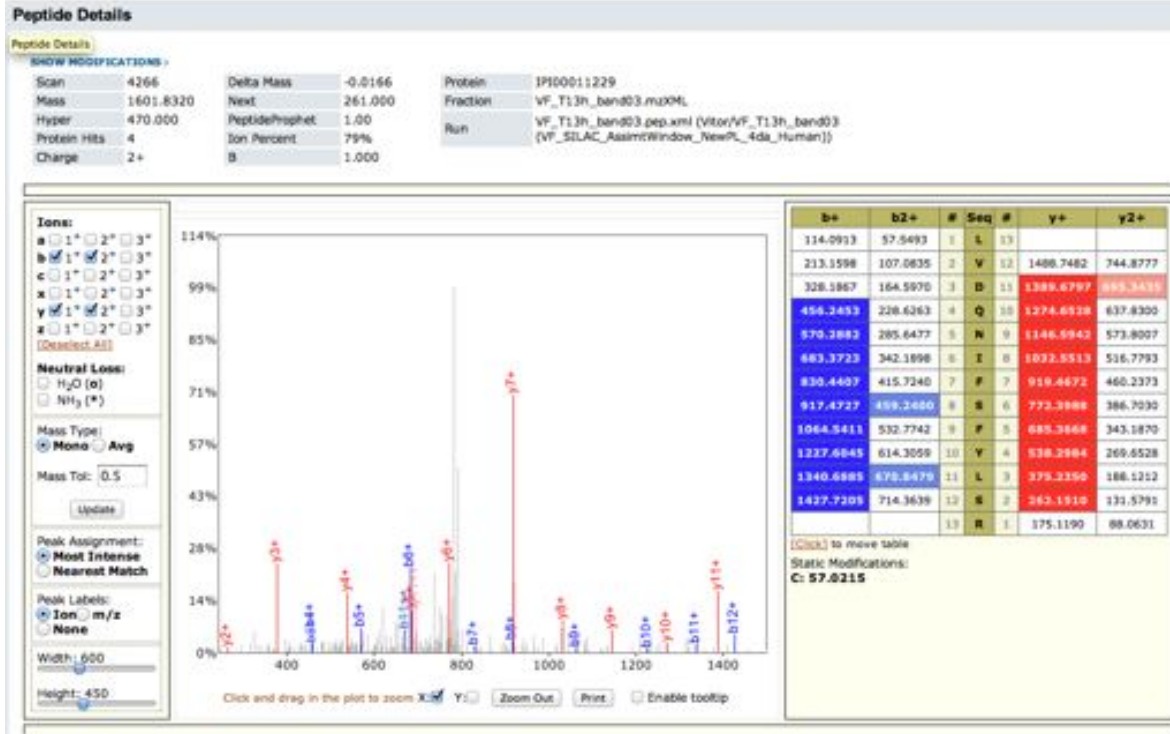

| Protein Probab. | Protein                                                     | Tot. Peptides | Unique Peptides | Best Gene Name                   | Scan# | Charge | Delta Mass | Peptide Prophet Score | Peptide Sequence     |
|-----------------|-------------------------------------------------------------|---------------|-----------------|----------------------------------|-------|--------|------------|-----------------------|----------------------|
| 0,9730          | IPI00887542,<br>IPI00908881,<br>IPI00027497,<br>IPI00910781 | 1             | 1               | LOC100133951,<br>-,<br>GPI,<br>- | 4278  | 2+     | -0,0176    | 0,9995                | K.ILLANFLAQTEALM"R.G |

### Peptide Details

#### SHOW MODIFICATIONS

|              |           |                |         |          |                                                                                      |
|--------------|-----------|----------------|---------|----------|--------------------------------------------------------------------------------------|
| Scan         | 4278      | Delta Mass     | -0.0176 | Protein  | IPI00027497                                                                          |
| Mass         | 1719.9460 | Next           | 277.000 | Fraction | VF_T13h_band02.mzXML                                                                 |
| Hyper        | 454.000   | PeptideProphet | 1.00    | Run      | VF_T13h_band02 pep.xml (Vitor/VF_T13h_band02 (VF_SILAC_AssmtWindow_NewPL_4da_Human)) |
| Protein Hits | 4         | Ion Percent    | 68%     |          |                                                                                      |
| Charge       | 2+        | B              | 1.000   |          |                                                                                      |

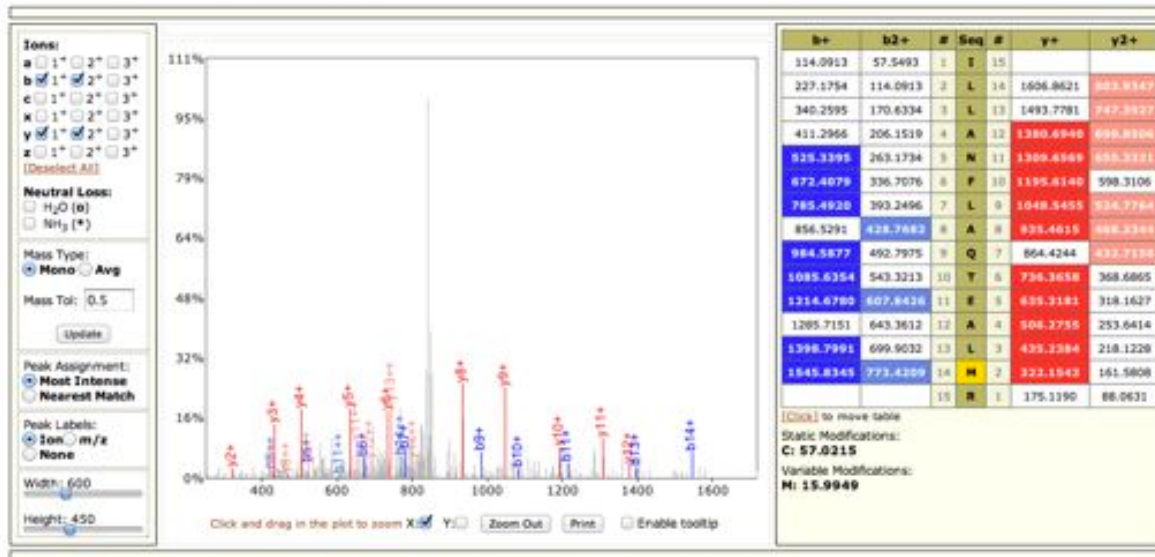

| Protein Probab. | Protein                     | Tot. Peptides | Unique Peptides | Best Gene Name  | Scan # | Charge | Delta Mass | Peptide Prophet Score | Peptide Sequence   |
|-----------------|-----------------------------|---------------|-----------------|-----------------|--------|--------|------------|-----------------------|--------------------|
| 0,9822          | IPI00014835,<br>IPI00641924 | 1             | 1               | MRPS9,<br>MRPS9 | 4285   | 2+     | -0,0150    | 0,9995                | R.AIAYLFPSGLFEK'.R |

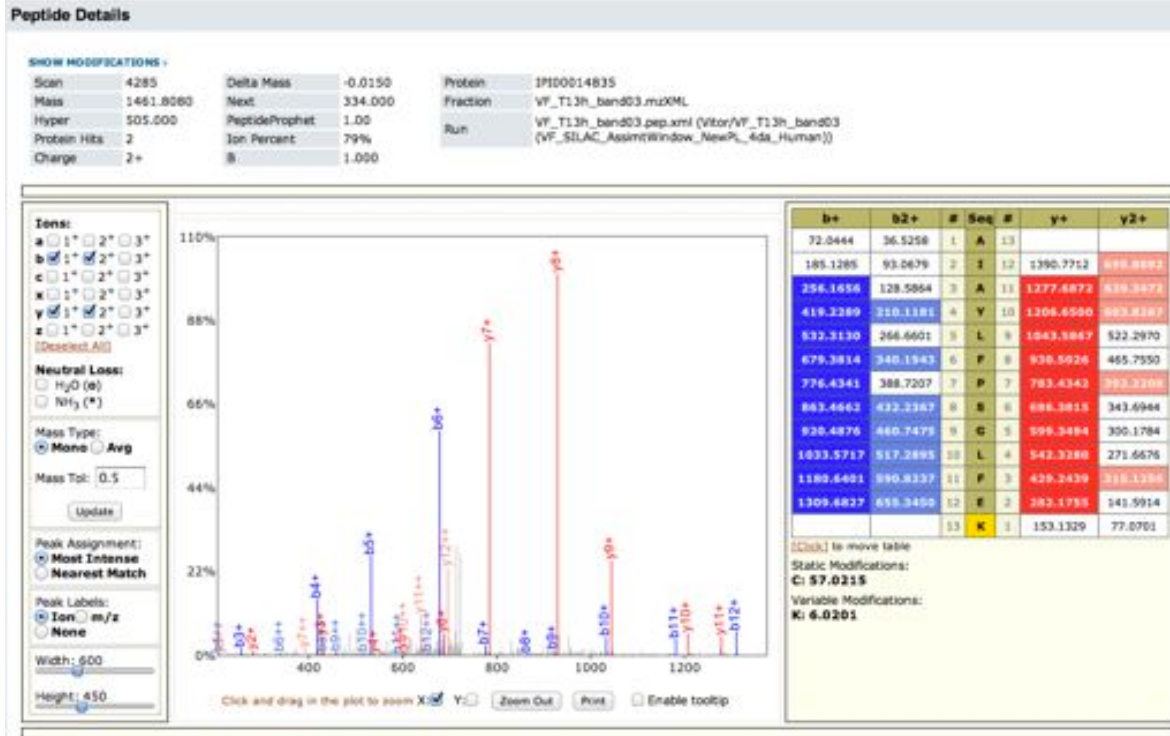



| Protein Probab. | Protein                     | Tot. Peptides | Unique Peptides | Best Gene Name        | Scan # | Charge | Delta Mass | Peptide Prophet Score | Peptide Sequence               |
|-----------------|-----------------------------|---------------|-----------------|-----------------------|--------|--------|------------|-----------------------|--------------------------------|
| 0,8718          | IPI00218547,<br>IPI00008982 | 1             | 1               | ALDH18A1,<br>ALDH18A1 | 4302   | 2+     | -0,0150    | 0,9927                | R.TPLFDQIIDM <sup>1</sup> LR.V |

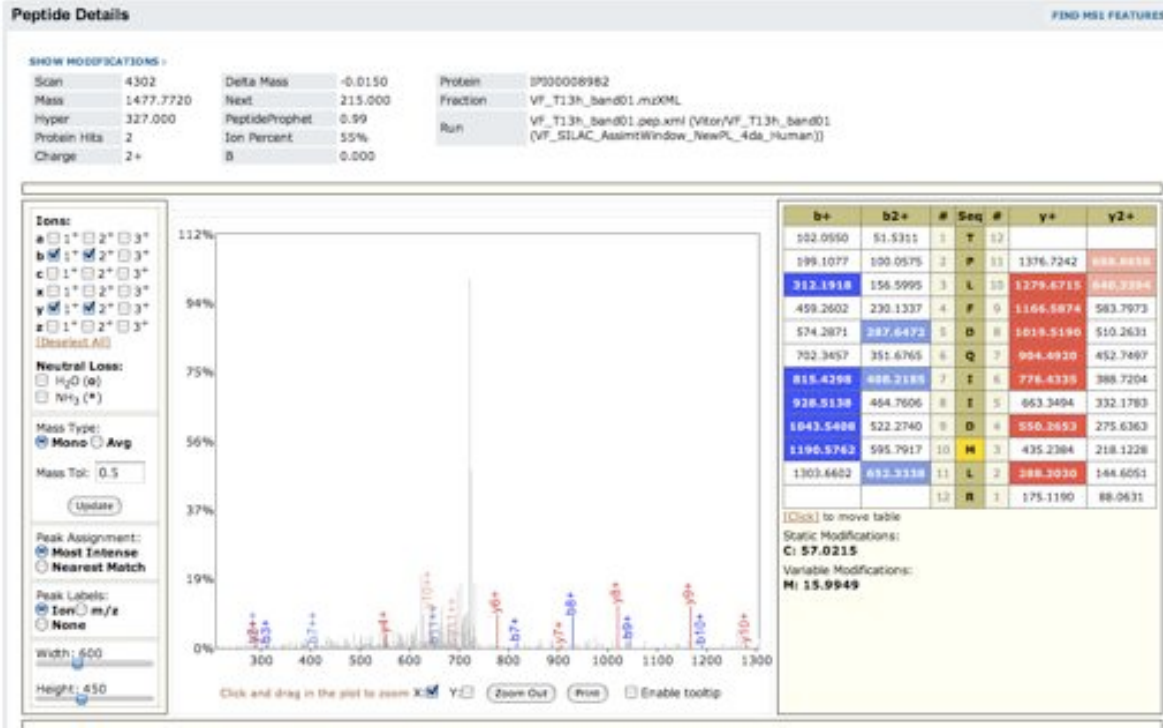

| Protein Probab. | Protein                     | Tot. Peptides | Unique Peptides | Best Gene Name    | Scan # | Charge | Delta Mass | Peptide Prophet Score | Peptide Sequence         |
|-----------------|-----------------------------|---------------|-----------------|-------------------|--------|--------|------------|-----------------------|--------------------------|
| 0,9801          | IPI00642549,<br>IPI00008223 | 1             | 1               | RAD23B,<br>RAD23B | 4305   | 2+     | -0,0222    | 0,9999                | R.QIIQQNPSSLLPALLQQIGR.E |

### Peptide Details

#### SHOW MODIFICATIONS -

|                 |                      |                                                                                              |
|-----------------|----------------------|----------------------------------------------------------------------------------------------|
| Scan: 4305      | Delta Mass: -0.0222  | Protein: IPI00008223                                                                         |
| Mass: 2130.2390 | Next: 228.000        | Fraction: VF_T13h_band02.mzXML                                                               |
| Hyper: 456.000  | PeptideProphet: 1.00 | Run: VF_T13h_band02.pep.xml (Vitor/VF_T13h_band02<br>[VF_SILAC_AssimWindow_NewPI_4da_Human]) |
| Protein Hits: 2 | Ion Percent: 86%     |                                                                                              |
| Charge: 2+      | B: 1.000             |                                                                                              |

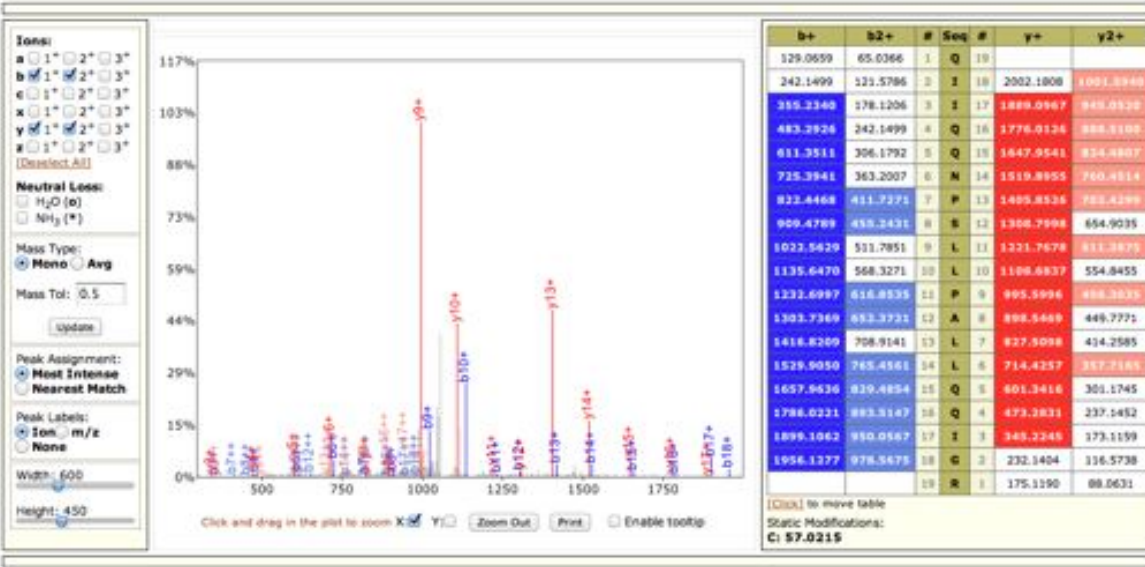

| Protein Probab. | Protein                                     | Tot. Peptides | Unique Peptides | Best Gene Name            | Scan # | Charge | Delta Mass | Peptide Prophet Score | Peptide Sequence       |
|-----------------|---------------------------------------------|---------------|-----------------|---------------------------|--------|--------|------------|-----------------------|------------------------|
| 0,8800          | IPI00062003,<br>IPI00440499,<br>IPI00030363 | 1             | 1               | ACAT1,<br>ACAT1,<br>ACAT1 | 4351   | 2+     | -0,0197    | 0,9933                | R.TPIGSFLGSLSLLPATK'.L |

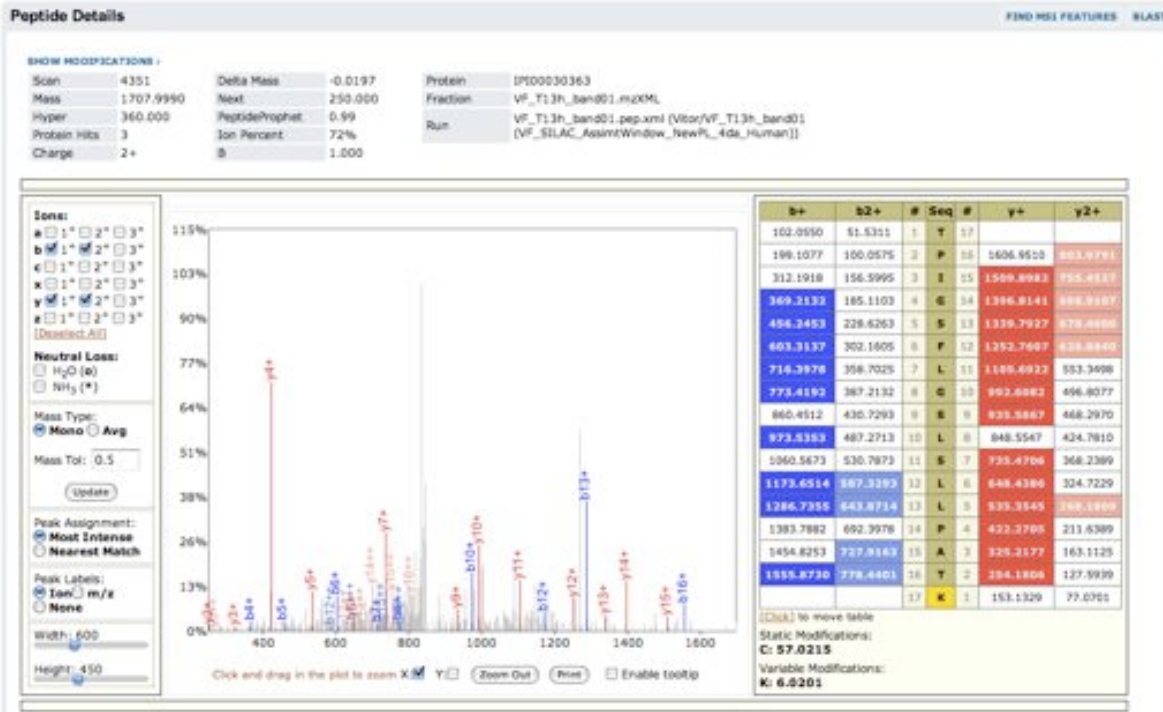

| Protein Probab. | Protein                                     | Tot. Peptides | Unique Peptides | Best Gene Name               | Scan # | Charge | Delta Mass | Peptide Prophet Score | Peptide Sequence                |
|-----------------|---------------------------------------------|---------------|-----------------|------------------------------|--------|--------|------------|-----------------------|---------------------------------|
| 0,9880          | IPI00795908,<br>IPI00791542,<br>IPI00013146 | 1             | 1               | MRPS22,<br>MRPS22,<br>MRPS22 | 4352   | 3+     | -0,0227    | 1,0000                | R.DLIDDATNLVQLYHVLHPDGQSAQGAK.D |

Peptide Details

FIND MS1 FEATURES

SHOW MODIFICATIONS

|              |           |                 |         |          |                                               |
|--------------|-----------|-----------------|---------|----------|-----------------------------------------------|
| Scan         | 4352      | Delta Mass      | -0.0227 | Protein  | IPI00013146                                   |
| Mass         | 2918.4640 | Next            | 321.000 | Fraction | VF_T13h_band03.mzXML                          |
| Hyper        | 535.000   | Peptide/Prophet | 1.00    | Run      | VF_T13h_band03.pep.xml (Vitor/VF_T13h_band03) |
| Protein Hits | 3         | Ion Percent     | 50%     |          | (VF_S1LAC_AssentWindow_NewPL_40a_human)       |
| Charge       | 3+        | B               | 1.000   |          |                                               |

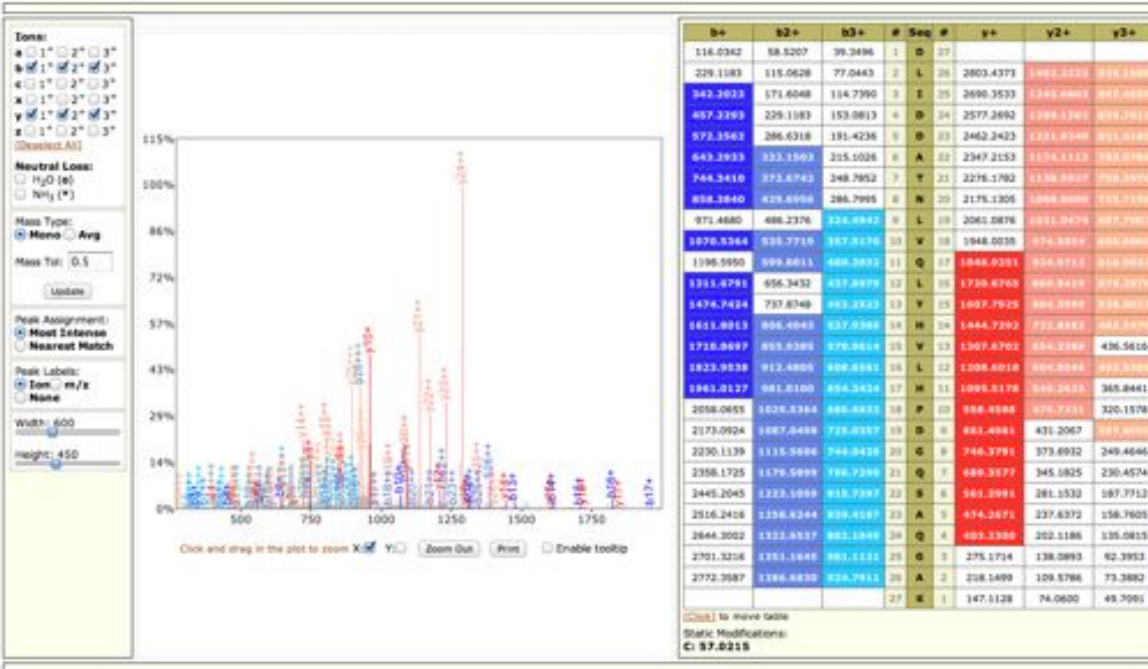

| Protein Probab. | Protein                                                                                     | Tot. Peptides | Unique Peptides | Best Gene Name                                          | Scan # | Charge | Delta Mass | Peptide Prophet Score | Peptide Sequence |
|-----------------|---------------------------------------------------------------------------------------------|---------------|-----------------|---------------------------------------------------------|--------|--------|------------|-----------------------|------------------|
| 0,9801          | IPI00793285,<br>IPI00845465,<br>IPI00909239,<br>IPI00013508,<br>IPI00013808,<br>IPI00759776 | 1             | 1               | ACTN4,<br>ACTN4,<br>ACTN1,<br>ACTN1,<br>ACTN4,<br>ACTN1 | 4353   | 2+     | -0,0153    | 0,9999                | R.VGWEQLLTIIAR.T |

### Peptide Details

#### SHOW MODIFICATIONS

|              |           |                 |         |          |                                                                                         |
|--------------|-----------|-----------------|---------|----------|-----------------------------------------------------------------------------------------|
| Scan         | 4353      | Delta Mass      | -0.0153 | Protein  | IPI00013508                                                                             |
| Mass         | 1386.7740 | Next            | 313.000 | Fraction | VF_T13h_band02.mzXML                                                                    |
| Hyper        | 569.000   | Peptide/Prophet | 1.00    | Run      | VF_T13h_band02.pep.xml (Vitor/VF_T13h_band02<br>(VF_SILAC_AssimWindow_NewPI_4da_Human)) |
| Protein Hits | 6         | Ion Percent     | 86%     |          |                                                                                         |
| Charge       | 2+        | B               | 1.000   |          |                                                                                         |

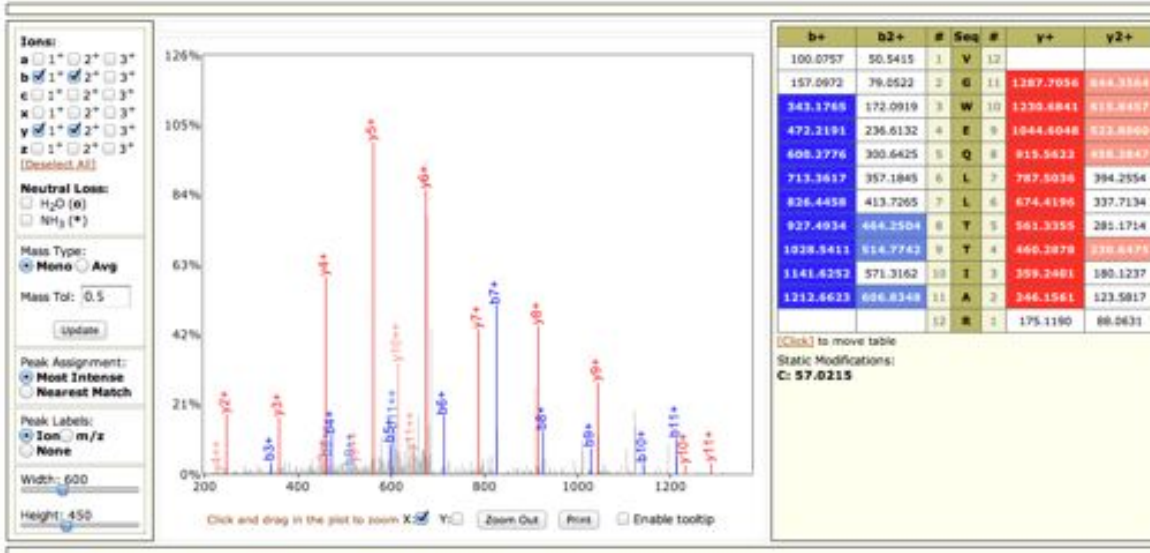

| Protein Probab. | Protein                                                                                                                                                                                                                     | Tot. Peptides | Unique Peptides | Best Gene Name                                                                                                                                                                            | Scan# | Charge | Delta Mass | Peptide Prophet Score | Peptide Sequence     |
|-----------------|-----------------------------------------------------------------------------------------------------------------------------------------------------------------------------------------------------------------------------|---------------|-----------------|-------------------------------------------------------------------------------------------------------------------------------------------------------------------------------------------|-------|--------|------------|-----------------------|----------------------|
| 0,9741          | IPI00003935, IPI00018534, IPI00020101, IPI00152785, IPI00152906, IPI00166293, IPI00220403, IPI00303133, IPI00329665, IPI00477495, IPI00515061, IPI00554798, IPI00815755, IPI00816252, IPI00419833, IPI00646240, IPI00794461 | 1             | 1               | HIST2H2BE, HIST1H2BL, HIST1H2BD, HIST1H2BO, HIST1H2BD, HIST3H2BB, HIST1H2BB, HIST1H2BH, HIST2H2BF, H2BFS, HIST1H2BJ, HIST1H2BM, HIST1H2BG, H2BFS, HIST1H2BK, HIST2H2BA, OTTHUMP0000039500 | 4353  | 2+     | -0,0232    | 0,9988                | K.AM"GIMNSFVNDIFER.I |

### Peptide Details

#### SHOW MODIFICATIONS

|              |           |                |         |          |                                                                                     |
|--------------|-----------|----------------|---------|----------|-------------------------------------------------------------------------------------|
| Scan         | 4353      | Delta Mass     | -0.0232 | Protein  | IPI00003935                                                                         |
| Mass         | 1759.8140 | Next           | 482.500 | Fraction | VF_T13h_band03.mzXML                                                                |
| Hyper        | 598.000   | PeptideProphet | 1.00    | Run      | VF_T13h_band03.pep.xml (Vitor/VF_T13h_band03 (VF_SILAC_AasimWindow_NewP_4da_Human)) |
| Protein Hits | 17        | Ion Percent    | 86%     |          |                                                                                     |
| Charge       | 2+        | B              | 1.000   |          |                                                                                     |

**Ions:**  
 a 1\*  2\*  3\*  
 b 1\*  2\*  3\*  
 c 1\*  2\*  3\*  
 x 1\*  2\*  3\*  
 y 1\*  2\*  3\*  
 z 1\*  2\*  3\*  
(Download All)

**Neutral Loss:**  
 H<sub>2</sub>O (o)  
 NH<sub>3</sub> (\*)

Mass Type:  
 Mono  Avg  
 Mass Tol: 0.5

Peak Assignment:  
 Most Intense  
 Nearest Match

Peak Labels:  
 Ion  m/z  
 None

Width: 600  
 Height: 450

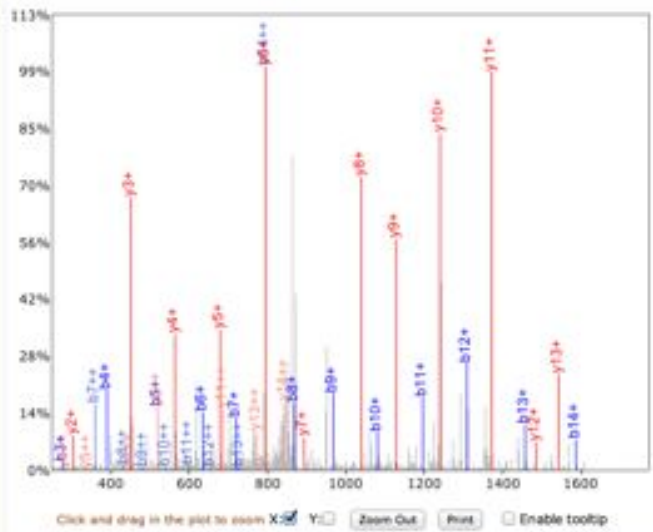

| b+        | b2+      | #  | Seq | #  | y+        | y2+      |
|-----------|----------|----|-----|----|-----------|----------|
| 72.0444   | 36.5258  | 1  | A   | 15 | 5688.7771 | 844.8923 |
| 219.0798  | 110.0435 | 2  | M   | 14 |           |          |
| 378.1013  | 138.5543 | 3  | G   | 13 | 1541.7417 | 771.3743 |
| 389.1853  | 195.0963 | 4  | I   | 12 | 1484.7202 | 742.8638 |
| 528.3288  | 260.6165 | 5  | M   | 11 | 1371.6343 | 596.3117 |
| 634.3447  | 317.6380 | 6  | N   | 10 | 1240.5957 | 620.8015 |
| 721.3097  | 381.1540 | 7  | S   | 8  | 1126.5527 | 563.7800 |
| 868.3692  | 434.6882 | 8  | F   | 8  | 1039.5207 | 530.2449 |
| 967.4376  | 484.3224 | 9  | V   | 7  | 892.4833  | 508.7398 |
| 1081.4805 | 541.2439 | 10 | N   | 6  | 793.3839  | 397.1956 |
| 1186.5074 | 598.7574 | 11 | D   | 5  | 679.3410  | 348.1741 |
| 1309.5915 | 655.2994 | 12 | Z   | 4  | 564.3140  | 332.8400 |
| 1458.4599 | 728.8336 | 13 | F   | 3  | 451.2300  | 226.1186 |
| 1585.7025 | 793.3549 | 14 | E   | 2  | 304.1815  | 152.5844 |
|           |          | 15 | R   | 1  | 175.1190  | 88.0631  |

[\[Click\]](#) to move table  
 Static Modifications:  
**C: 57.0215**  
 Variable Modifications:  
**M: 15.9949**

Click and drag in the plot to zoom X:  Y:     Enable tooltip

| Protein Probab. | Protein                     | Tot. Peptides | Unique Peptides | Best Gene Name  | Scan # | Charge | Delta Mass | Peptide Prophet Score | Peptide Sequence    |
|-----------------|-----------------------------|---------------|-----------------|-----------------|--------|--------|------------|-----------------------|---------------------|
| 0,8649          | IPI00645888,<br>IPI00029605 | 1             | 1               | GALNS,<br>GALNS | 4356   | 2+     | -0,0191    | 0,9926                | R.AIDGLNLLPTLLQGR.L |

### Peptide Details

#### SHOW MODIFICATIONS

|              |           |                |         |          |                                                                                        |
|--------------|-----------|----------------|---------|----------|----------------------------------------------------------------------------------------|
| Scan         | 4356      | Delta Mass     | -0.0191 | Protein  | IPI00029605                                                                            |
| Mass         | 1593.9320 | Next           | 270.000 | Fraction | VF_T13h_band02.mz0M                                                                    |
| Hyper        | 376.000   | PeptideProphet | 0.99    | Run      | VF_T13h_band02.pep.xml (Vitor/VF_T13h_band02 [VF_SILAC_AssimilWindow_NewPL_4ds_Human]) |
| Protein Hits | 2         | Ion Percent    | 57%     |          |                                                                                        |
| Charge       | 2+        | B              | 1.000   |          |                                                                                        |

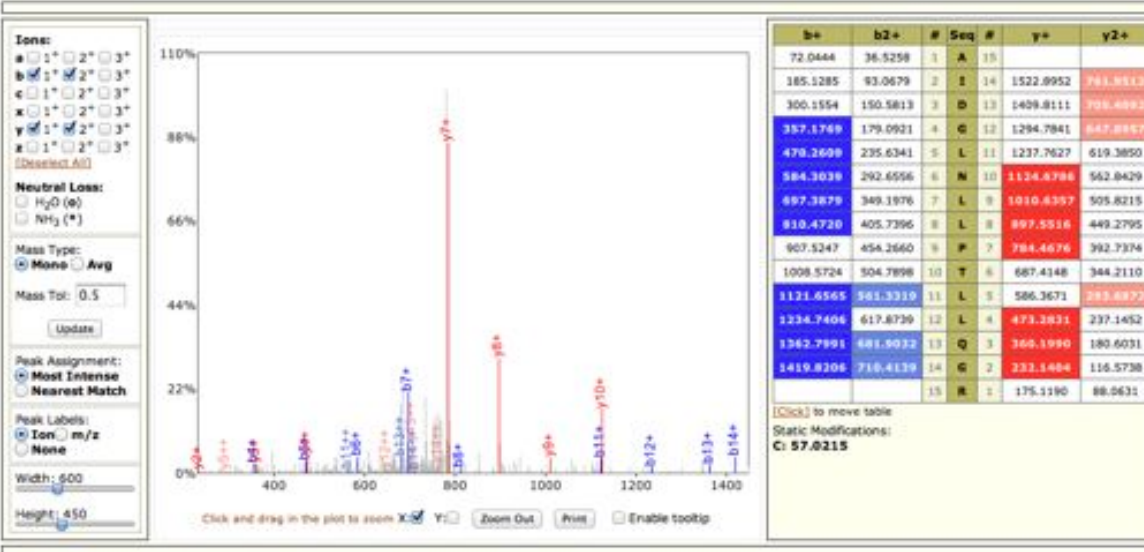

| Protein Probab. | Protein                                                                                     | Tot. Peptides | Unique Peptides | Best Gene Name                                                      | Scan # | Charge | Delta Mass | Peptide Prophet Score | Peptide Sequence           |
|-----------------|---------------------------------------------------------------------------------------------|---------------|-----------------|---------------------------------------------------------------------|--------|--------|------------|-----------------------|----------------------------|
| 0,9443          | IPI00894559,<br>IPI00555877,<br>IPI00894261,<br>IPI00029561,<br>IPI00894154,<br>IPI00103509 | 1             | 1               | NDUFA10,<br>NDUFA10,<br>NDUFA10,<br>NDUFA10,<br>NDUFA10,<br>NDUFA10 | 4369   | 3+     | -0,0269    | 0,9971                | R.LLQYSDALEHLLTTGQGVVLER.S |

Peptide Details

SHOW MODIFICATIONS -

|              |           |                |         |          |                                              |
|--------------|-----------|----------------|---------|----------|----------------------------------------------|
| Scan         | 4369      | Delta Mass     | -0.0269 | Protein  | IPI00029561                                  |
| Mass         | 2455.3190 | Next           | 443.000 | Fraction | VF_T13h_band04.mzXML                         |
| Hyper        | 536.000   | PeptideProphet | 1.00    | Run      | VF_T13h_band04.pep.xml (Vitor/VF_T13h_band04 |
| Protein Hits | 6         | Ion Percent    | 39%     |          | (VF_SS_AC_AssmWindow_NewPL_Adv_Human)        |
| Charge       | 3+        | S              | 1.000   |          |                                              |

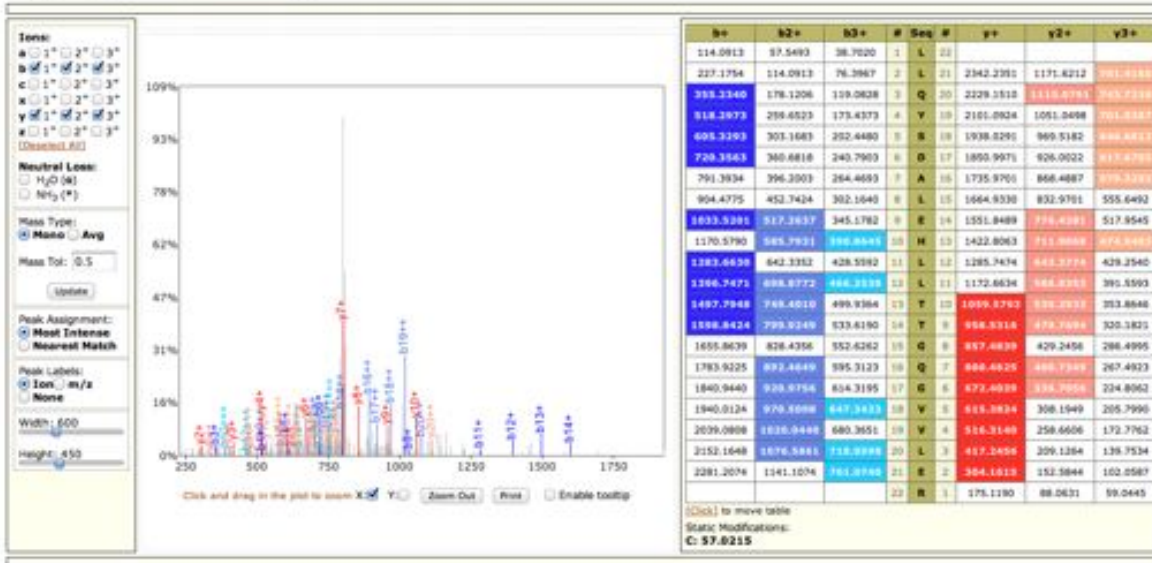



| Protein Probab. | Protein     | Tot. Peptides | Unique Peptides | Best Gene Name | Scan # | Charge | Delta Mass | Peptide Prophet Score | Peptide Sequence   |
|-----------------|-------------|---------------|-----------------|----------------|--------|--------|------------|-----------------------|--------------------|
| 0,9299          | IP100022246 | 1             | 1               | AZU1           | 4425   | 2+     | -0,0131    | 0,9948                | R.Q^FPFLASIQNQGR.H |

### Peptide Details

#### SHOW MODIFICATIONS

|              |           |                |         |          |                                                                                     |
|--------------|-----------|----------------|---------|----------|-------------------------------------------------------------------------------------|
| Scan         | 4425      | Delta Mass     | -0.0131 | Protein  | IP100022246                                                                         |
| Mass         | 1488.7590 | Next           | 272.000 | Fraction | VF_T13h_band03.mz006                                                                |
| Hyper        | 384.000   | PeptideProphet | 0.99    | Run      | VF_T13h_band03.pep.xml (Vitor/VF_T13h_band03 (VF_S2JAC_AssmtWindow_NewR_4da_Human)) |
| Protein Hits | 1         | Ion Percent    | 71%     |          |                                                                                     |
| Charge       | 2+        | b              | 1.000   |          |                                                                                     |

#### Ions:

- 1+  2+  3+  
 1+  2+  3+  
 1+  2+  3+  
 1+  2+  3+  
 1+  2+  3+  
 1+  2+  3+

[Delete All]

#### Neutral Loss:

- H<sub>2</sub>O (0)  
 NH<sub>3</sub> (\*)

#### Mass Type:

- Mono  Avg

Mass Tol: 0.5

[Update]

#### Peak Assignment:

- Most Intense  Nearest Match

#### Peak Labels:

- Ion<sub>m/z</sub>  None

Width: 600

Height: 450

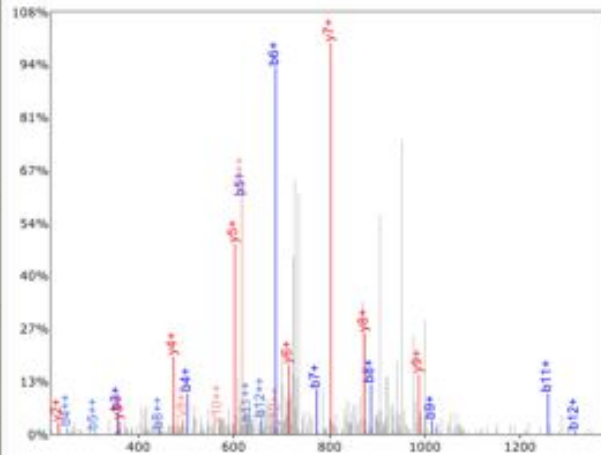

Click and drag in the plot to zoom X: [ ] Y: [ ] [Zoom Out] [Print] [Enable tooltip]

| b+        | b2+      | #  | Seq | #  | y+        | y2+      |
|-----------|----------|----|-----|----|-----------|----------|
| 112.0394  | 56.5233  | 1  | Q   | 13 |           |          |
| 259.1078  | 130.0575 | 2  | F   | 12 | 1377.7274 | 689.3473 |
| 356.1405  | 178.5839 | 3  | P   | 11 | 1230.6589 | 615.8311 |
| 603.2389  | 352.1181 | 4  | F   | 10 | 1133.6062 | 507.3867 |
| 616.3130  | 308.6601 | 5  | L   | 9  | 986.5378  | 493.7719 |
| 687.3501  | 344.1787 | 6  | A   | 8  | 873.4537  | 437.2305 |
| 774.3823  | 387.6947 | 7  | S   | 7  | 802.4166  | 401.7119 |
| 887.4462  | 444.2307 | 8  | I   | 6  | 715.3844  | 358.1959 |
| 1015.5248 | 508.2660 | 9  | Q   | 5  | 602.3005  | 301.6539 |
| 1129.5677 | 565.2875 | 10 | N   | 4  | 474.2419  | 237.6246 |
| 1257.6283 | 639.3168 | 11 | Q   | 3  | 360.1990  | 180.6031 |
| 1314.6478 | 657.8275 | 12 | C   | 2  | 232.1404  | 116.5738 |
|           |          | 13 | R   | 1  | 175.1190  | 88.0631  |

[Click] to move table

Static Modifications:

C: 57.0215

Variable Modifications:

Q: -17.0265

| Protein Probab. | Protein                     | Tot. Peptides | Unique Peptides | Best Gene Name | Scan # | Charge | Delta Mass | Peptide Prophet Score | Peptide Sequence    |
|-----------------|-----------------------------|---------------|-----------------|----------------|--------|--------|------------|-----------------------|---------------------|
| 0,9764          | IPI00217182,<br>IPI00013933 | 1             | 1               | DSP,<br>DSP    | 4437   | 2+     | -0,0161    | 0,9994                | K.SAIYQLEEEYENLLK.A |

### Peptide Details

| Peptide Details |           | Protein  |                                                                                      |
|-----------------|-----------|----------|--------------------------------------------------------------------------------------|
| Scan            | 4437      | Protein  | IPI00013933                                                                          |
| Mass            | 1841.5170 | Fraction | VF_T13h_band04.mzXML                                                                 |
| Hyper           | 426.000   | Run      | VF_T13h_band04 pep.xml (Vitor/VF_T13h_band04 [VF_SILAC_AssmtWindow_NewPL_4da_Human]) |
| Protein Hits    | 2         |          |                                                                                      |
| Charge          | 2+        | B        | 1.000                                                                                |
| Delta Mass      | -0.0161   |          |                                                                                      |
| Next            | 257.000   |          |                                                                                      |
| Peptide/Prophet | 1.00      |          |                                                                                      |
| Ion Percent     | 71%       |          |                                                                                      |

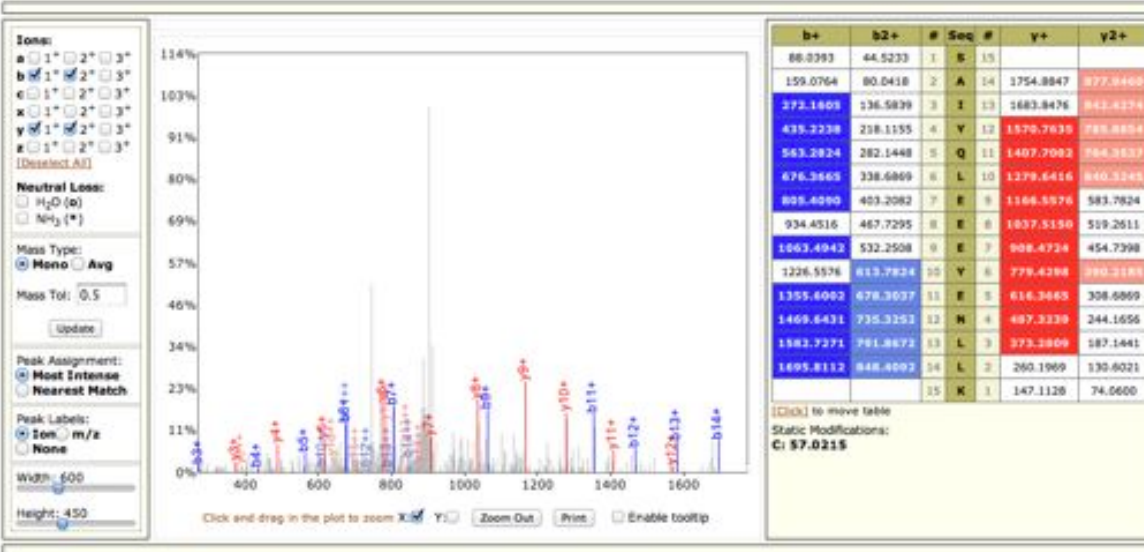

| Protein Probab. | Protein     | Tot. Peptides | Unique Peptides | Best Gene Name | Scan # | Charge | Delta Mass | Peptide Prophet Score | Peptide Sequence |
|-----------------|-------------|---------------|-----------------|----------------|--------|--------|------------|-----------------------|------------------|
| 0,9626          | IPI00103467 | 1             | 1               | ALDH 1B1       | 4443   | 2+     | -0,0109    | 0,9989                | R.LLNLLADLVER.D  |

Peptide Details

SHOW MODIFICATIONS

|              |           |                |         |          |                                                                                      |
|--------------|-----------|----------------|---------|----------|--------------------------------------------------------------------------------------|
| Scan         | 4443      | Delta Mass     | -0.0109 | Protein  | IPI00103467                                                                          |
| Mass         | 1166.7570 | Next           | 273.600 | Fraction | VF_T13h_band02.mzXML                                                                 |
| Hyper        | 424.000   | PeptideProphet | 1.00    | Run      | VF_T13h_band02.pep.xml (Vitor/VF_T13h_band02 [VF_SILAC_AssimWindow_NewPL_4da_Human]) |
| Protein Hits | 1         | Ion Percent    | 65%     |          |                                                                                      |
| Charge       | 2+        | B              | 1.000   |          |                                                                                      |

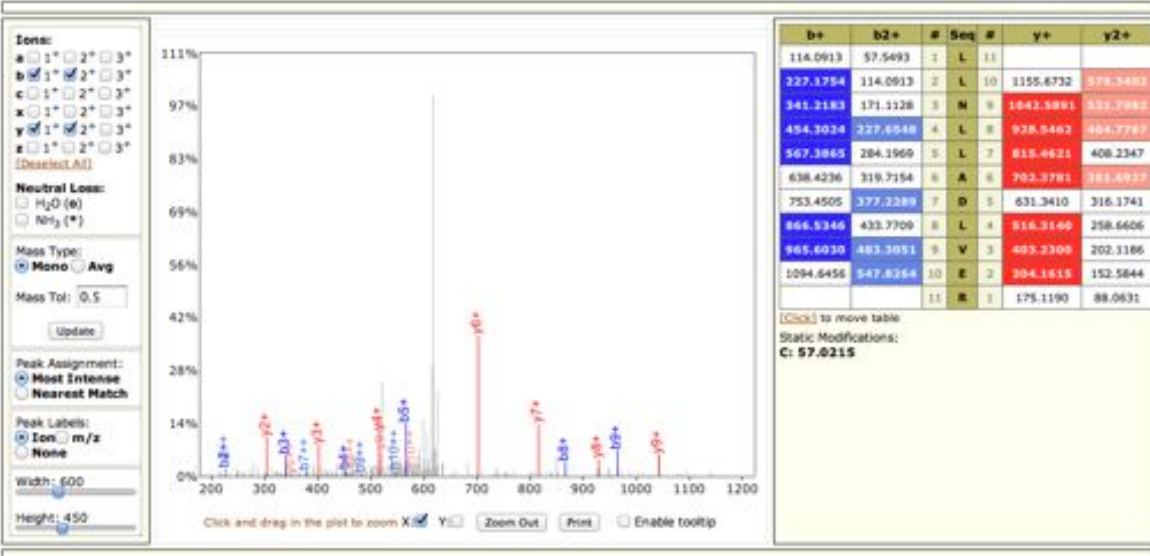

| Protein Probab. | Protein     | Tot. Peptides | Unique Peptides | Best Gene Name | Scan # | Charge | Delta Mass | Peptide Prophet Score | Peptide Sequence          |
|-----------------|-------------|---------------|-----------------|----------------|--------|--------|------------|-----------------------|---------------------------|
| 0,9880          | IPI00165092 | 1             | 1               | YARS2          | 4458   | 2+     | -0,0276    | 1,0000                | K.EAPFSEFFLDPGTSLVLDTCR.K |

### Peptide Details

#### SHOW MODIFICATIONS -

|              |           |                |         |          |                                                                                      |
|--------------|-----------|----------------|---------|----------|--------------------------------------------------------------------------------------|
| Scan         | 4458      | Delta Mass     | -0.0276 | Protein  | IPI00165092                                                                          |
| Mass         | 2288.0540 | Next           | 288.000 | Fraction | VF_T13h_band03.mzXML                                                                 |
| Hyper        | 609.000   | PeptideProphet | 1.00    | Run      | VF_T13h_band03.pep.xml (Vitor/VF_T13h_band03 [VF_SILAC_AssimWindow_NewPL_4da_Human]) |
| Protein Hits | 1         | Ion Percent    | 79%     |          |                                                                                      |
| Charge       | 2+        | B              | 1.000   |          |                                                                                      |

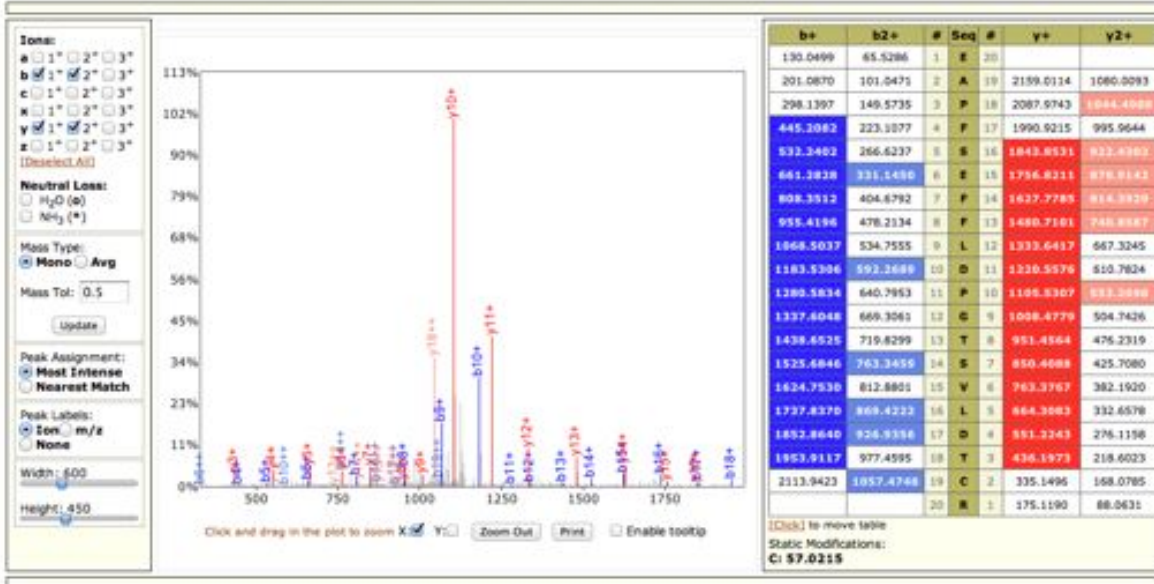

| Protein Probab. | Protein     | Tot. Peptides | Unique Peptides | Best Gene Name | Scan # | Charge | Delta Mass | Peptide Prophet Score | Peptide Sequence       |
|-----------------|-------------|---------------|-----------------|----------------|--------|--------|------------|-----------------------|------------------------|
| 0,9851          | IPI00215911 | 1             | 1               | APEX1          | 4460   | 2+     | -0,0199    | 1,0000                | R.QGFGELLQAVPLADSF.R.H |

### Peptide Details

#### SHOW MODIFICATIONS

|              |           |                 |         |          |                                                                                      |
|--------------|-----------|-----------------|---------|----------|--------------------------------------------------------------------------------------|
| Scan         | 4460      | Delta Mass      | -0.0199 | Protein  | IPI00215911                                                                          |
| Mass         | 1847.9650 | Next            | 316.000 | Fraction | VF_T13n_band04.mpXML                                                                 |
| Hydr         | 686.000   | Peptide/Prophet | 1.00    | Run      | VF_T13n_band04 pep.xml (Vitor/VF_T13n_band04 (VF_SILAC_AssayWindow_NewPL_4da_Human)) |
| Protein Hits | 1         | Ion Percent     | 88%     |          |                                                                                      |
| Charge       | 2+        | B               | 1.000   |          |                                                                                      |

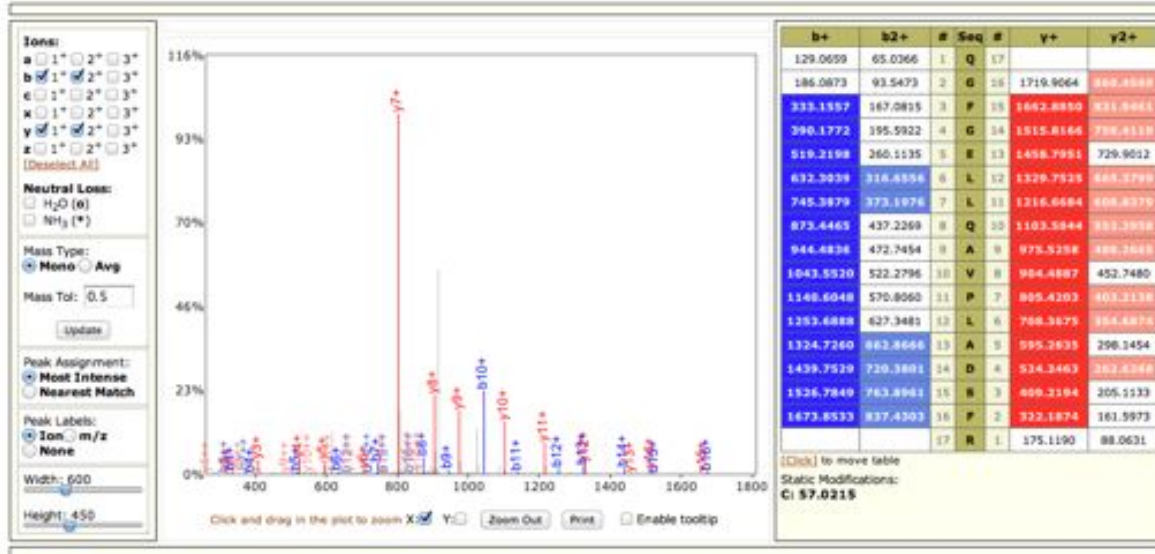

| Protein Probab. | Protein                                                     | Tot. Peptides | Unique Peptides | Best Gene Name                     | Scan # | Charge | Delta Mass | Peptide Prophet Score | Peptide Sequence                         |
|-----------------|-------------------------------------------------------------|---------------|-----------------|------------------------------------|--------|--------|------------|-----------------------|------------------------------------------|
| 0,8835          | IPI00844544,<br>IPI00639819,<br>IPI00642429,<br>IPI00025815 | 1             | 1               | -,<br>TARDBP,<br>TARDBP,<br>TARDBP | 4466   | 3+     | -0,0325    | 0,9902                | R.VTEDENDEPIEIPSEDDGTVLLSTVTAQFFGACGLR.Y |

Peptide Details

**SHOW MODIFICATIONS**

Scan: 4466  
Mass: 3874.8170  
Hyper: 488.000  
Protein Hits: 4  
Charge: 3+

Delta Mass: -0.0325  
Next: 411.000  
Peptide/Prophet: 0.99  
Ion Percent: 23%  
B: 1.000

Protein: IP00025815  
Fraction: VF\_T1.3h\_ban03.mskML  
Run: VF\_T1.3h\_ban03.pep.xml [Mixer/VF\_T1.3h\_ban03 (VF\_STIAC\_Assmt/Window\_fewP\_4da\_Human)]

| b+        | b2+       | b3+       | #  | Seq # | y+        | y2+       | y3+       |
|-----------|-----------|-----------|----|-------|-----------|-----------|-----------|
| 100.0757  | 35.5415   | 34.0301   | 1  | V     |           |           |           |
| 221.1234  | 101.0853  | 87.7126   | 2  | T     | 3775.7491 | 1888.3782 | 1279.2598 |
| 330.1860  | 145.5866  | 110.7268  | 3  | F     | 3674.7014 | 1837.8544 | 1225.8728 |
| 445.1929  | 223.1001  | 148.0692  | 4  | D     | 3545.6589 | 1773.3331 | 1182.5578 |
| 574.2355  | 287.6214  | 192.0633  | 5  | F     | 3430.6319 | 1705.8196 | 1144.2155 |
| 688.2784  | 344.6429  | 230.0077  | 6  | N     | 3301.5893 | 1651.2993 | 1101.2013 |
| 803.3054  | 402.1563  | 268.4400  | 7  | D     | 3187.5464 | 1594.2768 | 1061.0870 |
| 932.3480  | 466.6778  | 311.4542  | 8  | F     | 3072.5194 | 1536.7634 | 1024.8487 |
| 1029.4007 | 515.2040  | 343.8033  | 9  | P     | 2943.4769 | 1473.2431 | 981.8305  |
| 1142.4848 | 571.7460  | 381.4998  | 10 | T     | 2846.4241 | 1423.7157 | 945.4793  |
| 1271.5274 | 636.2673  | 424.5140  | 11 | E     | 2733.3400 | 1367.1734 | 911.7848  |
| 1384.6134 | 693.8094  | 462.2087  | 12 | I     | 2604.2974 | 1302.8524 | 868.7707  |
| 1481.6642 | 741.3357  | 494.5596  | 13 | P     | 2491.2134 | 1246.1582 | 831.0760  |
| 1568.6962 | 784.8618  | 523.5703  | 14 | S     | 2394.1606 | 1197.5839 | 798.7293  |
| 1697.7388 | 849.3771  | 566.5845  | 15 | E     | 2307.1286 | 1154.0639 | 768.1144  |
| 1812.7658 | 906.8988  | 604.8268  | 16 | D     | 2178.0860 | 1089.5466 | 726.7002  |
| 1927.7927 | 964.4200  | 643.2691  | 17 | D     | 2063.0590 | 1032.0332 | 688.3878  |
| 1984.8142 | 992.9507  | 662.2762  | 18 | C     | 1948.0321 | 974.5197  | 650.0155  |
| 2085.8619 | 1043.4346 | 695.9588  | 19 | T     | 1891.0106 | 946.0090  | 631.0084  |
| 2184.8303 | 1092.9688 | 728.9816  | 20 | V     | 1779.9636 | 895.4851  | 597.3258  |
| 2298.8143 | 1149.5108 | 766.4763  | 21 | L     | 1698.8848 | 843.0086  | 564.3030  |
| 2411.8984 | 1206.9538 | 804.3718  | 22 | L     | 1577.8105 | 789.4089  | 526.6083  |
| 2498.1304 | 1249.5689 | 833.3817  | 23 | S     | 1464.7244 | 733.0348  | 488.9137  |
| 2599.1781 | 1300.0827 | 867.0642  | 24 | T     | 1377.6944 | 689.3008  | 459.5030  |
| 2698.2465 | 1349.6269 | 900.0879  | 25 | V     | 1278.6447 | 638.8330  | 426.2204  |
| 2798.2942 | 1400.1587 | 935.1899  | 26 | T     | 1177.5783 | 589.2928  | 393.1876  |
| 2870.3313 | 1435.9993 | 967.4486  | 27 | A     | 1079.5366 | 538.7689  | 359.5153  |
| 2998.3899 | 1499.6964 | 1000.1348 | 28 | Q     | 1005.4935 | 503.2504  | 335.8360  |
| 3145.4583 | 1573.3328 | 1049.1576 | 29 | F     | 877.4348  | 439.2211  | 293.1498  |
| 3242.5111 | 1621.7592 | 1081.5085 | 30 | P     | 779.3949  | 385.6869  | 244.1270  |
| 3298.5325 | 1656.2689 | 1116.0187 | 31 | C     | 683.3187  | 317.1605  | 213.7763  |
| 3379.5696 | 1685.7885 | 1124.1947 | 32 | A     | 576.2923  | 288.6498  | 192.7689  |
| 3530.6003 | 1785.8038 | 1173.3363 | 33 | C     | 460.2352  | 253.1312  | 169.0699  |
| 3587.6218 | 1784.3145 | 1196.5454 | 34 | C     | 345.2245  | 173.1359  | 115.7463  |
| 3700.7059 | 1850.9566 | 1234.2401 | 35 | L     | 288.2030  | 144.6051  | 96.7392   |
|           |           |           | 36 | N     | 175.1190  | 88.0631   | 59.0445   |

Click and drag in the plot to zoom X: [ ] Y: [ ] Zoom Out [ ] Print [ ] Enable tooltip [ ]

| Protein Probab. | Protein     | Tot. Peptides | Unique Peptides | Best Gene Name | Scan # | Charge | Delta Mass | Peptide Prophet Score | Peptide Sequence |
|-----------------|-------------|---------------|-----------------|----------------|--------|--------|------------|-----------------------|------------------|
| 0,9115          | IPI00016513 | 1             | 1               | RAB10          | 4478   | 2+     | -0,0113    | 0,9946                | K.AFLTLAEDILR.K  |

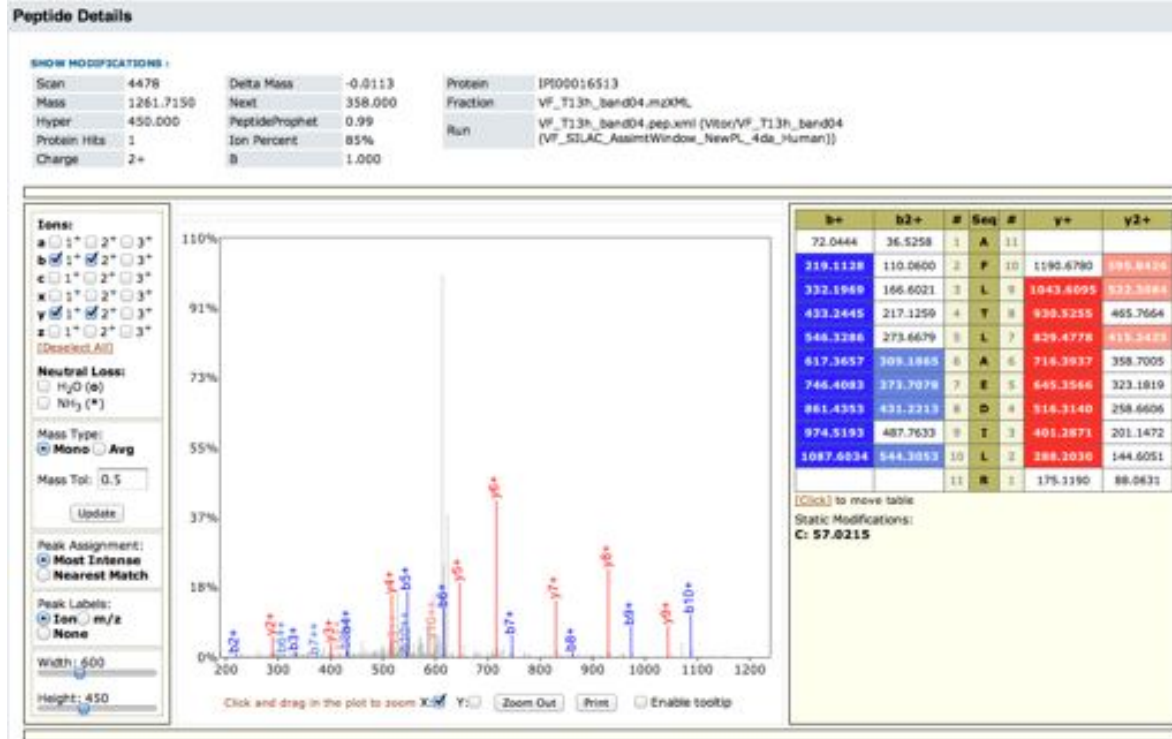

| Protein Probab. | Protein                                                                                     | Tot. Peptides | Unique Peptides | Best Gene Name                                          | Scan # | Charge | Delta Mass | Peptide Prophet Score | Peptide Sequence |
|-----------------|---------------------------------------------------------------------------------------------|---------------|-----------------|---------------------------------------------------------|--------|--------|------------|-----------------------|------------------|
| 0,9869          | IPI00793285,<br>IPI00845465,<br>IPI00909239,<br>IPI00013508,<br>IPI00013808,<br>IPI00759776 | 1             | 1               | ACTN4,<br>ACTN4,<br>ACTN1,<br>ACTN1,<br>ACTN4,<br>ACTN1 | 4478   | 2+     | -0,0143    | 0,9999                | R.VGWEQLLTIIAR.T |

### Peptide Details

#### SHOW MODIFICATIONS

|              |           |                |         |          |                                                                                      |
|--------------|-----------|----------------|---------|----------|--------------------------------------------------------------------------------------|
| Scan         | 4478      | Delta Mass     | -0.0143 | Protein  | IPI00013508                                                                          |
| Mass         | 1386.7740 | Next           | 338.000 | Fraction | VF_T13H_band03.mzXML                                                                 |
| Hyper        | 627.000   | PeptideProphet | 1.00    | Run      | VF_T13H_band03.pep.xml (Vitor/VF_T13H_band03 (VF_SILAC_AssmtWindow_NewPL_4da_Human)) |
| Protein Hits | 6         | Ion Percent    | 86%     |          |                                                                                      |
| Charge       | 2+        | B              | 1.000   |          |                                                                                      |

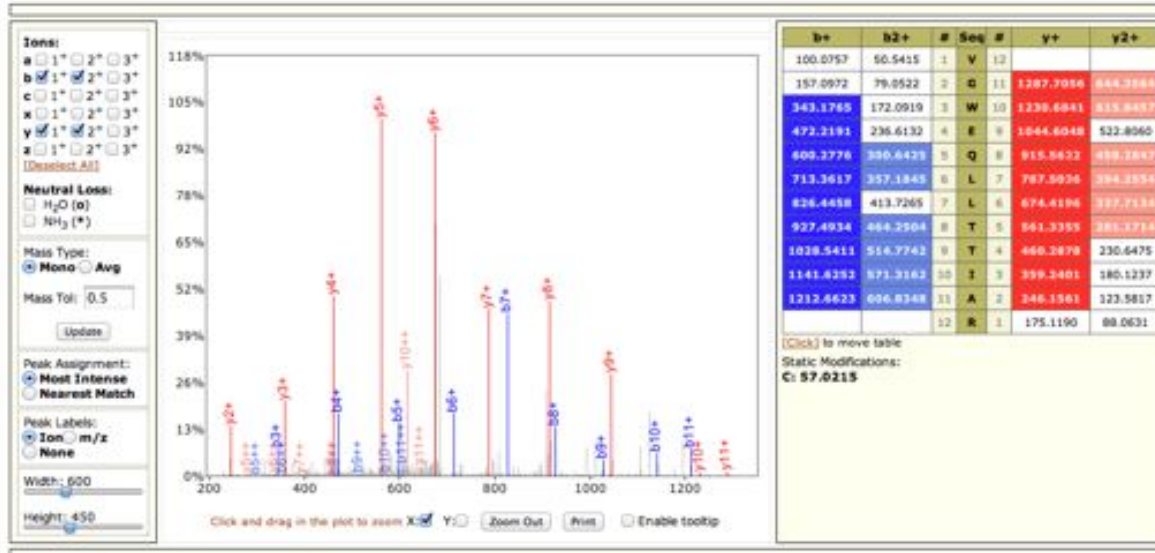



| Protein Probab. | Protein                                                     | Tot. Peptides | Unique Peptides | Best Gene Name                  | Scan # | Charge | Delta Mass | Peptide Prophet Score | Peptide Sequence      |
|-----------------|-------------------------------------------------------------|---------------|-----------------|---------------------------------|--------|--------|------------|-----------------------|-----------------------|
| 0,9819          | IPI00789242,<br>IPI00788668,<br>IPI00063234,<br>IPI00219774 | 1             | 1               | -,<br>-,<br>PRKAR2A,<br>PRKAR2A | 4485   | 2+     | -0,0233    | 1,0000                | K.NLDQEQLSQVLDAMFER.I |

### Peptide Details

#### SHOW MODIFICATIONS

|                 |                      |                                                   |
|-----------------|----------------------|---------------------------------------------------|
| Scan: 4485      | Delta Mass: -0.0233  | Protein: IPI00063234                              |
| Mass: 2035.9750 | Next: 306.000        | Fraction: VF_T13h_band02.mzXML                    |
| Hyper: 638.000  | PeptideProphet: 1.00 | Run: VF_T13h_band02.pep.xml (Vitor/VF_T13h_band02 |
| Protein Hits: 4 | Ion Percent: 88%     | (VF_SILAC_AssimWindow_NewPL_4da_Human))           |
| Charge: 2+      | B: 1.000             |                                                   |

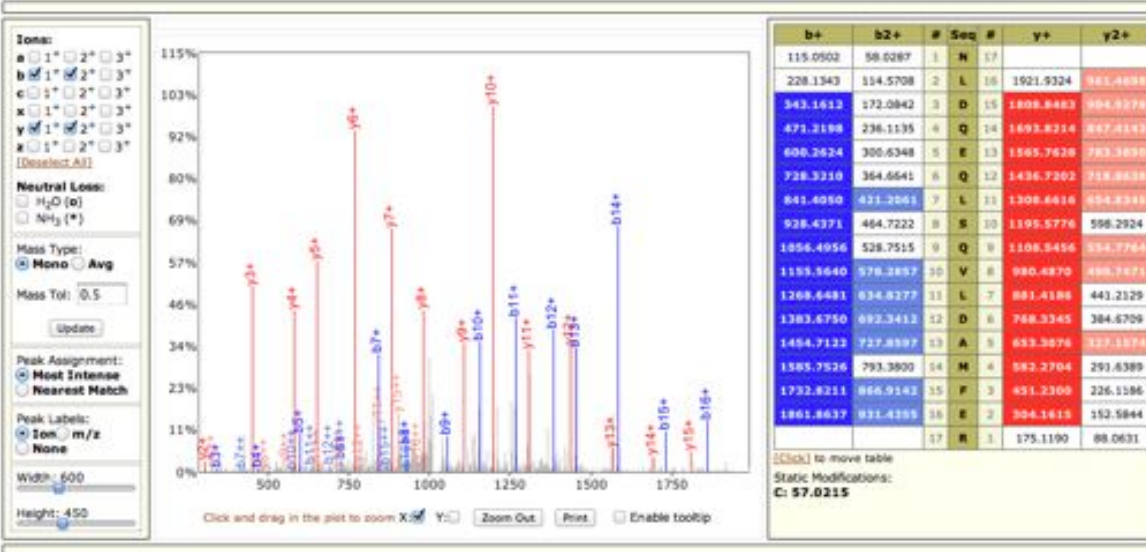

| b+        | b2+      | #  | Seq # | y+ | y2+       |
|-----------|----------|----|-------|----|-----------|
| 115.0502  | 58.6287  | 1  | N     | 17 |           |
| 228.1343  | 114.5708 | 2  | L     | 16 | 1921.9324 |
| 343.1612  | 172.0842 | 3  | D     | 15 | 1809.8483 |
| 471.2198  | 236.1135 | 4  | Q     | 14 | 1693.8214 |
| 606.2424  | 300.6348 | 5  | E     | 13 | 1565.7628 |
| 728.3216  | 364.6641 | 6  | Q     | 12 | 1436.7202 |
| 841.4050  | 431.2061 | 7  | L     | 11 | 1308.6616 |
| 928.4371  | 464.7222 | 8  | S     | 10 | 1195.5776 |
| 1054.4956 | 528.7515 | 9  | Q     | 9  | 1108.5456 |
| 1155.5640 | 578.2857 | 10 | V     | 8  | 980.4870  |
| 1269.6481 | 634.8277 | 11 | L     | 7  | 881.4186  |
| 1383.6750 | 692.3412 | 12 | D     | 6  | 768.3345  |
| 1494.7123 | 757.8997 | 13 | A     | 5  | 655.3078  |
| 1585.7526 | 793.3800 | 14 | M     | 4  | 582.2704  |
| 1722.8211 | 866.9142 | 15 | F     | 3  | 451.2300  |
| 1861.8637 | 931.4355 | 16 | E     | 2  | 304.1613  |
|           |          | 17 | R     | 1  | 175.1100  |

Static Modifications:  
C: 57.0215



| Protein Probab. | Protein                     | Tot. Peptides | Unique Peptides | Best Gene Name  | Scan # | Charge | Delta Mass | Peptide Prophet Score | Peptide Sequence    |
|-----------------|-----------------------------|---------------|-----------------|-----------------|--------|--------|------------|-----------------------|---------------------|
| 0,9851          | IPI00872379,<br>IPI00329801 | 1             | 1               | ANXA5,<br>ANXA5 | 4507   | 2+     | -0,0201    | 1,0000                | K.GLGTDEESILLLTSR.S |

### Peptide Details

#### SHOW MODIFICATIONS

|              |           |                |         |          |                                                                                       |
|--------------|-----------|----------------|---------|----------|---------------------------------------------------------------------------------------|
| Scan         | 4507      | Delta Mass     | -0.0201 | Protein  | IPI00329801                                                                           |
| Mass         | 1704.9010 | Next           | 313.000 | Fraction | VF_T13h_band04.mzXML                                                                  |
| Hyper        | 665.000   | PeptideProphet | 1.00    | Run      | VF_T13h_band04 pep.xml (Vitor/VF_T13h_band04 (VF_SILAC_AssintWindow_NewPL_4da_Human)) |
| Protein Hits | 2         | Ion Percent    | 83%     |          |                                                                                       |
| Charge       | 2+        | B              | 1.000   |          |                                                                                       |

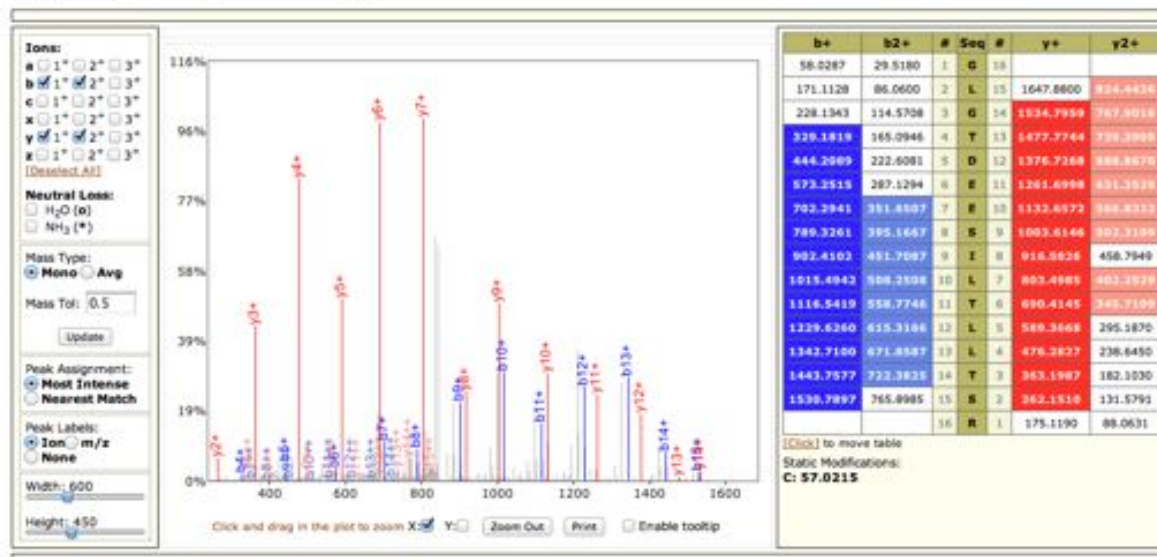

| Protein Probab. | Protein                                                                     | Tot. Peptides | Unique Peptides | Best Gene Name                                        | Scan # | Charge | Delta Mass | Peptide Prophet Score | Peptide Sequence        |
|-----------------|-----------------------------------------------------------------------------|---------------|-----------------|-------------------------------------------------------|--------|--------|------------|-----------------------|-------------------------|
| 0,9833          | IPI00909013,<br>IPI00420088,<br>IPI00643007,<br>IPI00024660,<br>IPI00386516 | 1             | 1               | -,<br>KIAA0174,<br>KIAA0174,<br>KIAA0174,<br>KIAA0174 | 4536   | 2+     | -0,0210    | 0,9996                | K.ELDSGLAESVSTLIWAAPR.L |

### Peptide Details

#### SHOW MODIFICATIONS -

|              |           |                |         |          |                                                                                     |
|--------------|-----------|----------------|---------|----------|-------------------------------------------------------------------------------------|
| Scan         | 4536      | Delta Mass     | -0.0210 | Protein  | IPI00024660                                                                         |
| Mass         | 2015.0440 | Next           | 277.000 | Fraction | VF_T13h_band03.mzXML                                                                |
| Hyper        | 463.000   | PeptideProphet | 1.00    | Run      | VF_T13h_band03.pep.xml (Vitor/VF_T13h_band03 (VF_SILAC_AssimWindow_NewR_4da_Human)) |
| Protein Hits | 5         | Ion Percent    | 78%     |          |                                                                                     |
| Charge       | 2+        | B              | 1.000   |          |                                                                                     |

- Ions:**
- 1\*
  - 1\*
  - 2\*
  - 3\*
  - 1\*
  - 2\*
  - 3\*
  - 1\*
  - 2\*
  - 3\*
  - 1\*
  - 2\*
  - 3\*
  - 1\*
  - 2\*
  - 3\*
- [\[Deselect All\]](#)

- Neutral Loss:**
- H<sub>2</sub>O (0)
  - NH<sub>3</sub> (\*)

- Mass Type:**
- Mono
  - Avg

Mass Tol: 0.5

- Peak Assignment:**
- Most Intense
  - Nearest Match

- Peak Labels:**
- Ion, m/z
  - None

Width: 500  
Height: 450

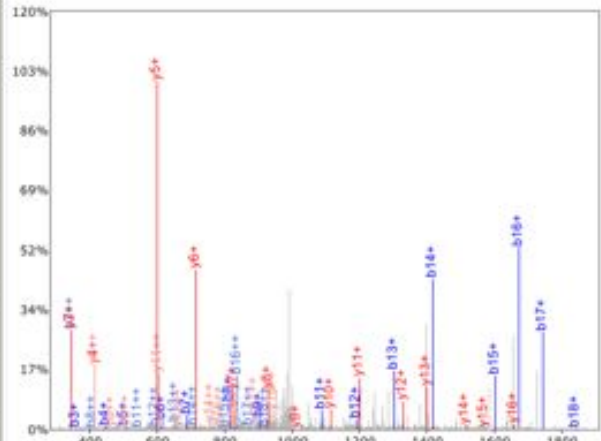

Click and drag in the plot to zoom X: Y:    Enable tooltip

| b+        | b2+      | #  | Seq # | y+ | y2+       |
|-----------|----------|----|-------|----|-----------|
| 130.0499  | 65.5286  | 1  | E     | 10 |           |
| 243.1339  | 122.0706 | 2  | L     | 10 | 1886.0018 |
| 358.1609  | 179.5841 | 3  | D     | 17 | 1772.9177 |
| 445.1929  | 223.1001 | 4  | S     | 10 | 1657.8988 |
| 503.2144  | 251.6108 | 5  | C     | 15 | 1570.8588 |
| 615.2984  | 308.1529 | 6  | L     | 14 | 1513.8373 |
| 686.3355  | 343.6714 | 7  | A     | 13 | 1400.7532 |
| 815.3781  | 408.1927 | 8  | E     | 12 | 1329.7141 |
| 902.4102  | 451.7087 | 9  | S     | 11 | 1200.6735 |
| 1001.4786 | 501.2429 | 10 | V     | 10 | 1113.4415 |
| 1089.5106 | 544.7589 | 11 | S     | 9  | 1014.3731 |
| 1189.5583 | 595.2828 | 12 | T     | 8  | 927.5411  |
| 1302.6434 | 651.8248 | 13 | L     | 7  | 826.4934  |
| 1415.7284 | 708.3468 | 14 | I     | 6  | 713.4093  |
| 1401.8057 | 691.4065 | 15 | W     | 5  | 609.3283  |
| 1472.8438 | 736.9251 | 16 | A     | 4  | 414.2459  |
| 1743.8800 | 873.4436 | 17 | A     | 3  | 343.3088  |
| 1849.9327 | 930.9708 | 18 | P     | 2  | 272.1717  |
|           |          | 19 | R     | 1  | 175.1190  |

to move table  
Static Modifications:  
C: 57.0215

| Protein Probab. | Protein                     | Tot. Peptides | Unique Peptides | Best Gene Name | Scan # | Charge | Delta Mass | Peptide Prophet Score | Peptide Sequence      |
|-----------------|-----------------------------|---------------|-----------------|----------------|--------|--------|------------|-----------------------|-----------------------|
| 0,9869          | IPI00872814,<br>IPI00219365 | 1             | 1               | MSN,<br>MSN    | 4544   | 2+     | -0,0149    | 0,9999                | K.FYPEDVSEELIQDITQR.L |

### Peptide Details

#### SHOW MODIFICATIONS

|              |           |                |         |          |                                                                                       |
|--------------|-----------|----------------|---------|----------|---------------------------------------------------------------------------------------|
| Scan         | 4544      | Delta Mass     | -0.0149 | Protein  | IPI00219365                                                                           |
| Mass         | 2082.0030 | Next           | 312.000 | Fraction | VF_T13h_band03.mzXML                                                                  |
| Hyper        | 568.000   | PeptideProphet | 1.00    | Run      | VF_T13h_band03.pep.xml (Vitor/VF_T13h_band03 (VF_S0_LAC_AssimWindow_NewPL_4da_Human)) |
| Protein Hits | 2         | Ion Percent    | 91%     |          |                                                                                       |
| Charge       | 2+        | B              | 1.000   |          |                                                                                       |

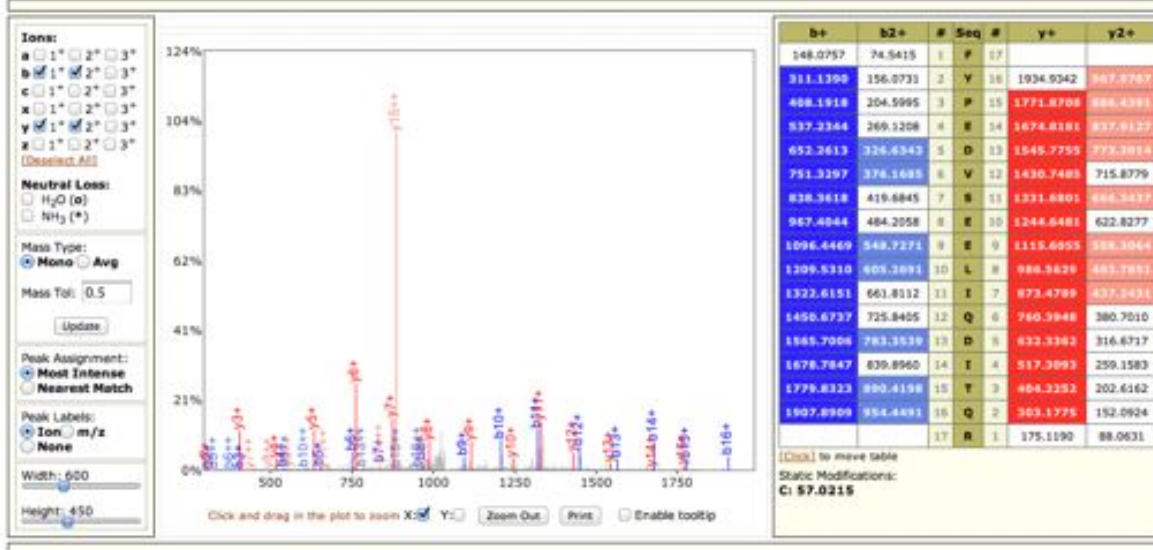

| Protein Probab. | Protein     | Tot. Peptides | Unique Peptides | Best Gene Name | Scan # | Charge | Delta Mass | Peptide Prophet Score | Peptide Sequence    |
|-----------------|-------------|---------------|-----------------|----------------|--------|--------|------------|-----------------------|---------------------|
| 0,9636          | IPI00029744 | 1             | 1               | SSBP1          | 4546   | 2+     | -0,0163    | 0,9985                | K.NPVTIFSLATNEMWR.S |

### Peptide Details

Peptide Details

SHOW MODIFICATIONS

|              |           |                |         |          |                                                                                       |
|--------------|-----------|----------------|---------|----------|---------------------------------------------------------------------------------------|
| Scan         | 4546      | Delta Mass     | -0.0163 | Protein  | IPI00029744                                                                           |
| Mass         | 1778.8890 | Next           | 278.000 | Fraction | VF_T13h_band04.mzXML                                                                  |
| Hyper        | 418.000   | PeptideProphet | 1.00    | Run      | VF_T13h_band04 pep.xml (Viktor/VF_T13h_band04 (VF_SILAC_AssimWindow_NewPL_4da_Human)) |
| Protein Hits | 1         | Ion Percent    | 79%     |          |                                                                                       |
| Charge       | 2+        | B              | 1.000   |          |                                                                                       |

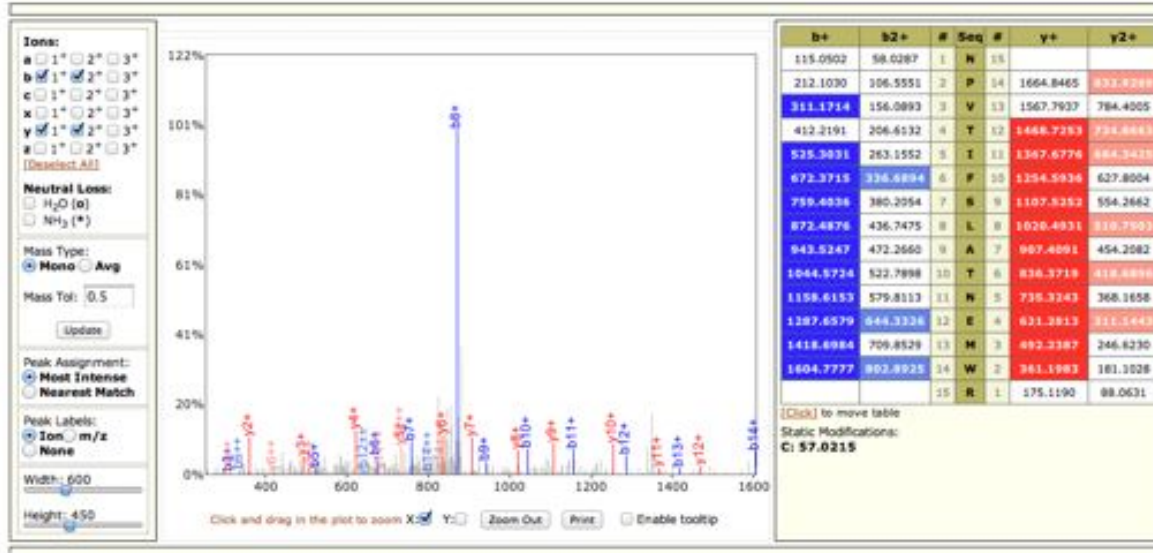

| Protein Probab. | Protein     | Tot. Peptides | Unique Peptides | Best Gene Name | Scan # | Charge | Delta Mass | Peptide Prophet Score | Peptide Sequence         |
|-----------------|-------------|---------------|-----------------|----------------|--------|--------|------------|-----------------------|--------------------------|
| 0,9869          | IPI00005087 | 1             | 1               | TMOD3          | 4566   | 2+     | -0,0264    | 0,9999                | K.QLETVLDLDPENALLPAGFR.Q |

### Peptide Details

#### SHOW MODIFICATIONS

|              |           |                |         |          |                                               |
|--------------|-----------|----------------|---------|----------|-----------------------------------------------|
| Scan         | 4566      | Delta Mass     | -0.0264 | Protein  | IPI00005087                                   |
| Mass         | 2326.1930 | Next           | 283.000 | Fraction | VF_T13h_band03.mzXML                          |
| Hyper        | 526.000   | PeptideProphet | 1.00    | Run      | VF_T13h_band03.pep.xml (Vitor/VF_T13h_band03) |
| Protein Hits | 1         | Ion Percent    | 65%     |          | (VF_SILAC_AssayWindow_NewR_4da_Human)         |
| Charge       | 2+        | B              | 1.000   |          |                                               |

- Ions:**
- 1<sup>+</sup>  2<sup>+</sup>  3<sup>+</sup>
  - 1<sup>+</sup>  2<sup>+</sup>  3<sup>+</sup>

- Neutral Loss:**
- H<sub>2</sub>O (0)
  - NH<sub>3</sub> (\*)

- Mass Type:**
- Mono  Avg

Mass Tol: 0.5

- Peak Assignment:**
- Most Intense
  - Nearest Match

- Peak Labels:**
- Ion\_m/z
  - None

Width: 600

Height: 450

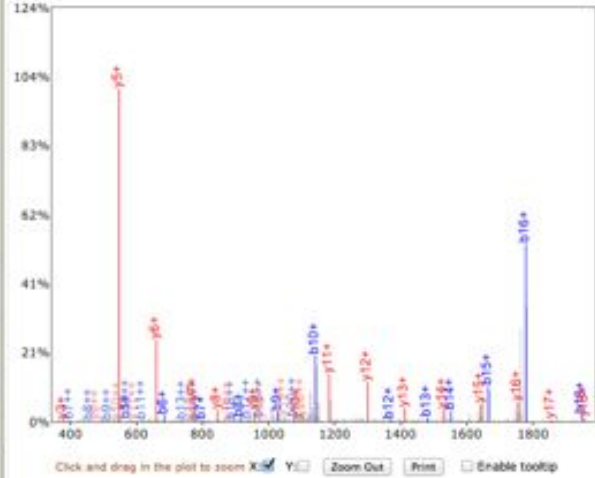

| b+        | b2+       | #  | Seq | #  | y+        | y2+       |
|-----------|-----------|----|-----|----|-----------|-----------|
| 129.0659  | 65.0366   | 1  | Q   | 21 |           |           |
| 242.1499  | 121.5786  | 2  | L   | 20 | 2198.1339 | 1099.8708 |
| 371.1925  | 186.0999  | 3  | E   | 19 | 2085.0499 | 1043.0205 |
| 472.2402  | 236.6237  | 4  | T   | 18 | 1956.0073 | 978.0037  |
| 571.3088  | 286.1579  | 5  | V   | 17 | 1854.9596 | 927.9834  |
| 684.3927  | 342.7000  | 6  | L   | 16 | 1755.8912 | 878.4492  |
| 799.4198  | 400.2134  | 7  | D   | 15 | 1642.8071 | 821.9072  |
| 914.4466  | 457.7269  | 8  | D   | 14 | 1527.7802 | 764.3902  |
| 1027.5306 | 516.3689  | 9  | L   | 13 | 1412.7532 | 706.8803  |
| 1142.5576 | 571.7824  | 10 | D   | 12 | 1309.6692 | 650.3382  |
| 1299.6103 | 630.3088  | 11 | P   | 11 | 1184.4422 | 593.8208  |
| 1368.6529 | 684.8301  | 12 | E   | 10 | 1087.5895 | 544.2984  |
| 1482.6938 | 741.8516  | 13 | N   | 9  | 958.5460  | 479.7771  |
| 1553.7320 | 777.3701  | 14 | A   | 8  | 844.5039  | 422.7556  |
| 1666.8170 | 833.9121  | 15 | L   | 7  | 773.4668  | 387.2371  |
| 1779.9011 | 890.4542  | 16 | L   | 6  | 680.3828  | 330.8950  |
| 1876.9529 | 938.9806  | 17 | P   | 5  | 547.2887  | 274.1530  |
| 1947.9910 | 974.4951  | 18 | A   | 4  | 450.2459  | 225.8266  |
| 2005.0124 | 1003.0099 | 19 | G   | 3  | 379.2088  | 190.1081  |
| 2152.0808 | 1076.5441 | 20 | F   | 2  | 322.1874  | 161.5973  |
|           |           | 21 | R   | 1  | 175.1190  | 88.0631   |

[Click] to move table  
Static Modifications:  
C: 57.0215

| Protein Probab. | Protein     | Tot. Peptides | Unique Peptides | Best Gene Name | Scan # | Charge | Delta Mass | Peptide Prophet Score | Peptide Sequence                        |
|-----------------|-------------|---------------|-----------------|----------------|--------|--------|------------|-----------------------|-----------------------------------------|
| 0,9851          | IPI00017227 | 1             | 1               | UBTD1          | 4568   | 3+     | -0,0485    | 1,0000                | R.YQLPIYCLSPPVNLLLEHTEEEESLEPPEPPPSVR.R |

Peptide Details

SHOW MODIFICATIONS

|                 |                       |                                                  |
|-----------------|-----------------------|--------------------------------------------------|
| Scan: 4568      | Delta Mass: -0.0485   | Protein: IPI00017227                             |
| Mass: 3942.5830 | Next: 418.000         | Fraction: VP_T13h_ban004.mzXML                   |
| Hyper: 674.000  | Peptide/Prophet: 1.00 | Run: VP_T13h_ban004.pep.xml (VBox/VP_T13h_ban004 |
| Protein Hits: 1 | Ion Percent: 45%      | Run: (Vf_SILAC_AssimWindow_NewP_4da_Human)       |
| Charge: 3+      | B: 1.000              |                                                  |

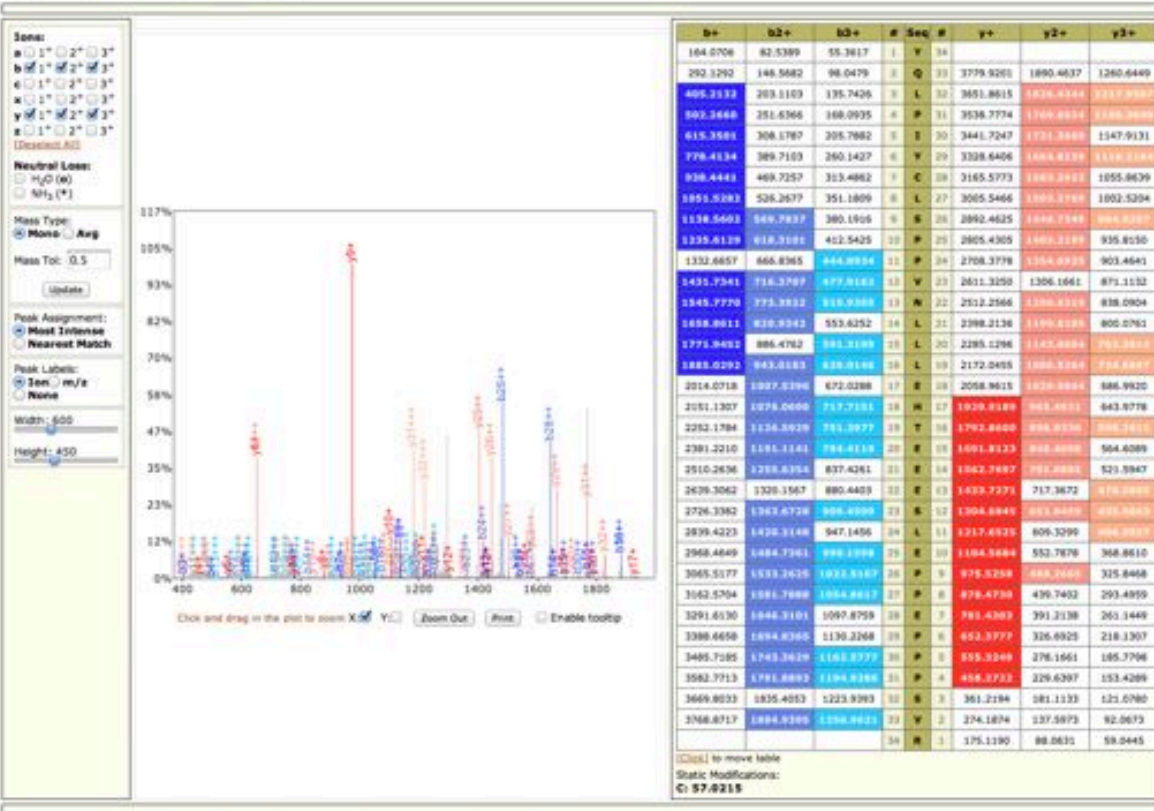



| Protein Probab. | Protein                     | Tot. Peptides | Unique Peptides | Best Gene Name | Scan # | Charge | Delta Mass | Peptide Prophet Score | Peptide Sequence    |
|-----------------|-----------------------------|---------------|-----------------|----------------|--------|--------|------------|-----------------------|---------------------|
| 0,9822          | IP100909658,<br>IP100010471 | 1             | 1               | -,<br>LCP1     | 4579   | 2+     | -0,0194    | 0,9995                | K.VNDDIIVNWVNETLR.E |

### Peptide Details

#### SHOW MODIFICATIONS

|              |           |                |         |          |                                                                                         |
|--------------|-----------|----------------|---------|----------|-----------------------------------------------------------------------------------------|
| Scan         | 4579      | Delta Mass     | -0.0194 | Protein  | IP000010471                                                                             |
| Mass         | 1799.9290 | Next           | 281.000 | Fraction | VF_T13h_band03.mzXML                                                                    |
| Hyper        | 460.000   | PeptideProphet | 1.00    | Run      | VF_T13h_band03.pep.xml (Vitor/VF_T13h_band03<br>[VF_SILAC_AssmtWindow_NewPI_4da_Human]) |
| Protein Hits | 2         | Ion Percent    | 82%     |          |                                                                                         |
| Charge       | 2+        | B              | 1.000   |          |                                                                                         |

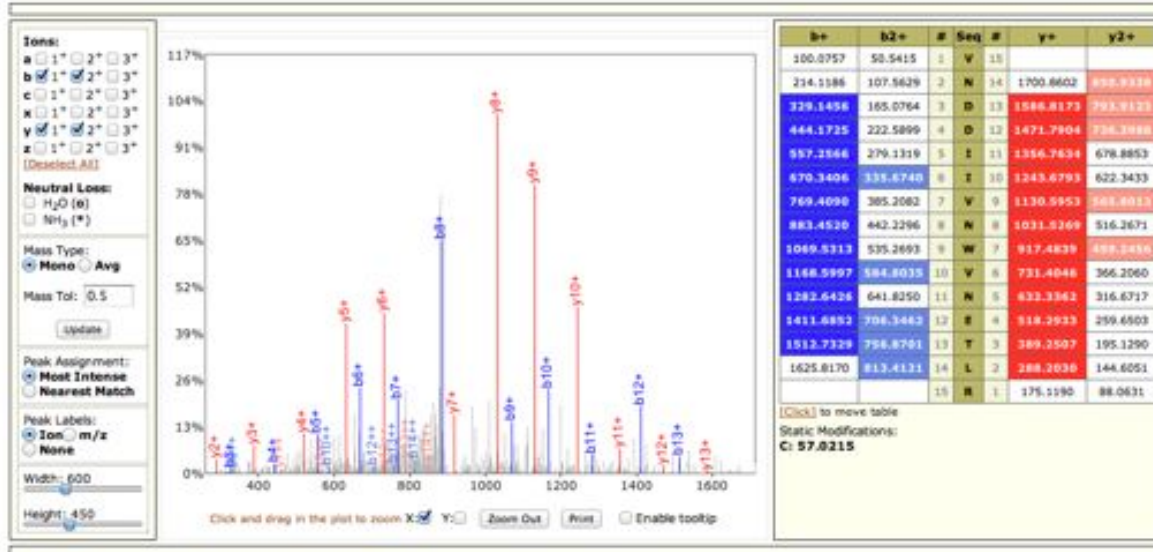

| Protein Probab. | Protein                                     | Tot. Peptides | Unique Peptides | Best Gene Name               | Scan # | Charge | Delta Mass | Peptide Prophet Score | Peptide Sequence        |
|-----------------|---------------------------------------------|---------------|-----------------|------------------------------|--------|--------|------------|-----------------------|-------------------------|
| 0,9594          | IPI00221362,<br>IPI00221360,<br>IPI00001699 | 1             | 1               | PYCARD,<br>PYCARD,<br>PYCARD | 4582   | 2+     | -0,0133    | 0,9982                | R.DAILDALENLTAEELK'K'.F |

### Peptide Details

#### SHOW MODIFICATIONS

|              |           |                |         |          |                                                                                     |
|--------------|-----------|----------------|---------|----------|-------------------------------------------------------------------------------------|
| Scan         | 4582      | Delta Mass     | -0.0133 | Protein  | IPI00001699                                                                         |
| Mass         | 1698.0520 | Next           | 227.000 | Fraction | VF_T13h_band04.mzXML                                                                |
| Hydr         | 366.000   | PeptideProphet | 1.00    | Run      | VF_T13h_band04.pep.xml (Vtor/VF_T13h_band04 (VF_SILAC_AssimWindow_NewPL_4da_Human)) |
| Protein Hits | 3         | Ion Percent    | 78%     |          |                                                                                     |
| Charge       | 2+        | B              | 1.000   |          |                                                                                     |

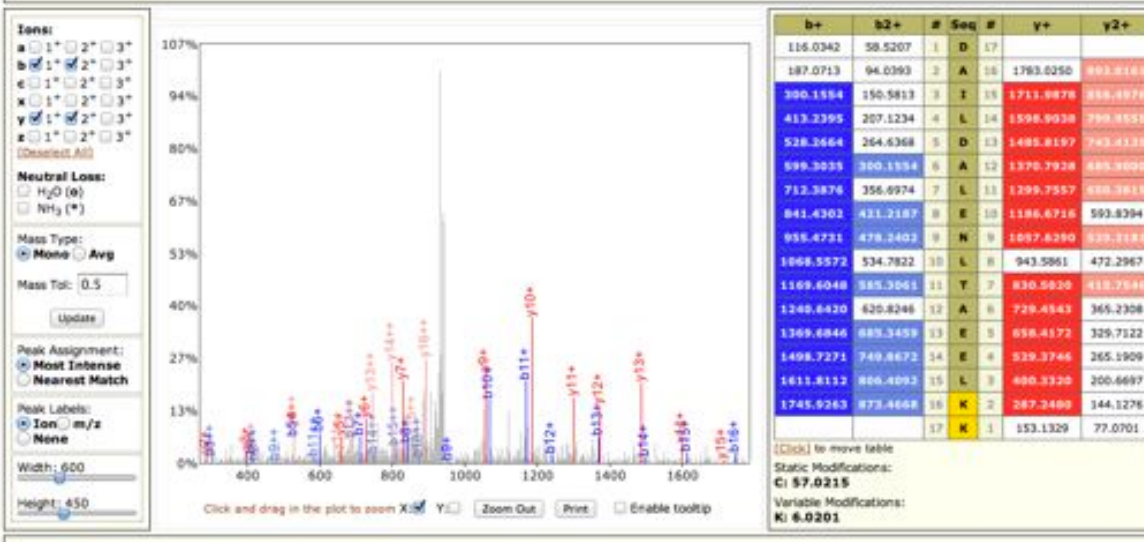

| Protein Probab. | Protein     | Tot. Peptides | Unique Peptides | Best Gene Name | Scan # | Charge | Delta Mass | Peptide Prophet Score | Peptide Sequence   |
|-----------------|-------------|---------------|-----------------|----------------|--------|--------|------------|-----------------------|--------------------|
| 0,9764          | IP100023728 | 1             | 1               | GGH            | 4584   | 2+     | -0,0166    | 0,9994                | K.TAFYLAEFFVNEAR.K |

### Peptide Details

#### SHOW MODIFICATIONS

|              |           |                |         |          |                                                                                       |
|--------------|-----------|----------------|---------|----------|---------------------------------------------------------------------------------------|
| Scan         | 4584      | Delta Mass     | -0.0166 | Protein  | IP00023728                                                                            |
| Mass         | 1677.8270 | Next           | 249.000 | Fraction | VF_T13h_band04.mzXML                                                                  |
| Hyper        | 422.000   | PeptideProphet | 1.00    | Run      | VF_T13h_band04_pep.xml (Vitor/VF_T13h_band04 (VF_SILAC_AssintWindow_NewPL_4da_Human)) |
| Protein Hits | 1         | Ion Percent    | 81%     |          |                                                                                       |
| Charge       | 2+        | B              | 1.000   |          |                                                                                       |

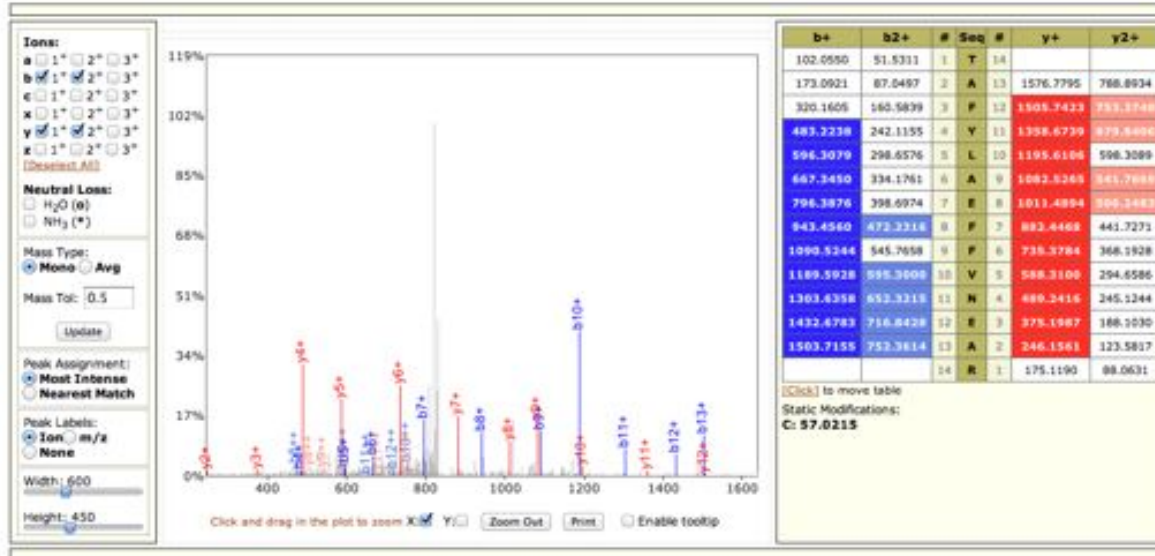



| Protein Probab. | Protein                     | Tot. Peptides | Unique Peptides | Best Gene Name    | Scan # | Charge | Delta Mass | Peptide Prophet Score | Peptide Sequence                   |
|-----------------|-----------------------------|---------------|-----------------|-------------------|--------|--------|------------|-----------------------|------------------------------------|
| 0,9869          | IPI00166730,<br>IPI00006713 | 1             | 1               | DNAJC3,<br>DNAJC3 | 4593   | 3+     | +0,9791    | 0,9999                | K.LLAAGQLADALSQFHAAVDGDPDNYIAYYR.R |

Peptide Details

SHOW MODIFICATIONS:

|              |           |                 |         |                        |                                          |
|--------------|-----------|-----------------|---------|------------------------|------------------------------------------|
| Scan         | 4593      | Delta Mass      | +0.9791 | Protein                | IPI00006713                              |
| Mass         | 3238.5800 | Next            | 373.000 | Fraction               | VP_T13P_band03.mzXML                     |
| Index        | 577.000   | Peptide/Prophet | 1.00    | VP_T13P_band03.pep.xml | (/vbox/VP_T13P_band03)                   |
| Protein Hits | 2         | Ion Percent     | 54%     | Run                    | (VP_SILAC_AssayWindow_NewPL_Ada_human()) |
| Charge       | 3+        | B               | 1.000   |                        |                                          |

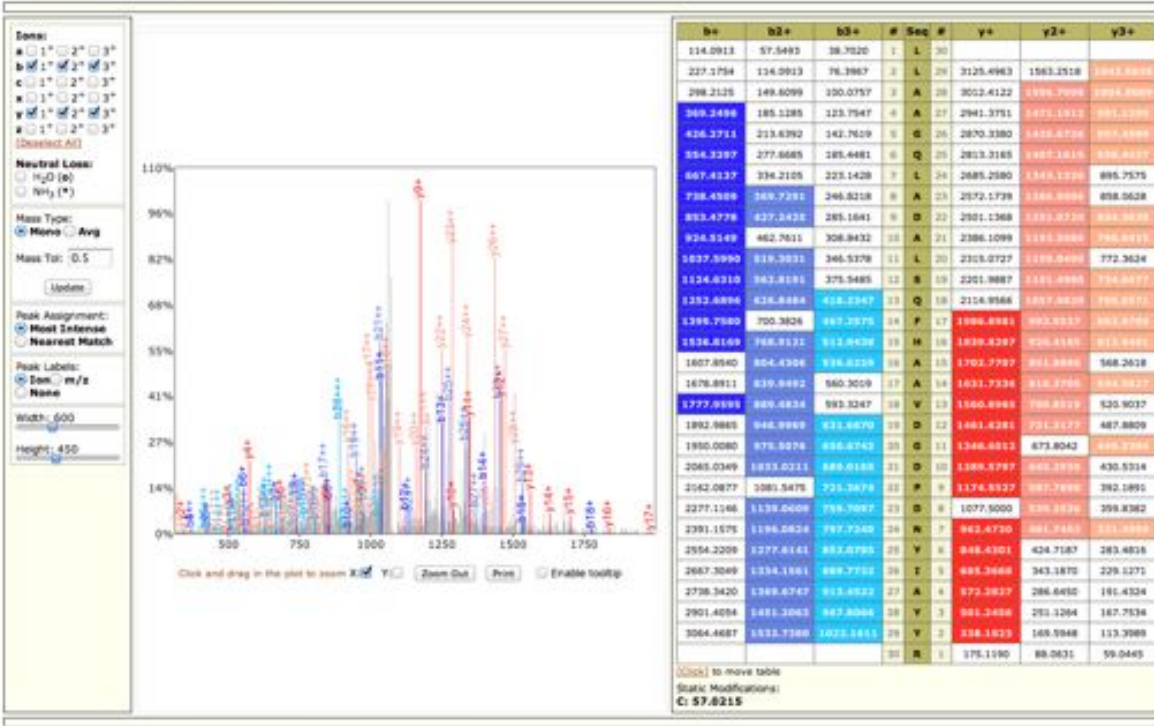



| Protein Probab. | Protein                                                     | Tot. Peptides | Unique Peptides | Best Gene Name                  | Scan # | Charge | Delta Mass | Peptide Prophet Score | Peptide Sequence      |
|-----------------|-------------------------------------------------------------|---------------|-----------------|---------------------------------|--------|--------|------------|-----------------------|-----------------------|
| 0,9880          | IPI00789242,<br>IPI00788668,<br>IPI00063234,<br>IPI00219774 | 1             | 1               | -,<br>-,<br>PRKAR2A,<br>PRKAR2A | 4628   | 2+     | -0,0327    | 1,0000                | K.NLDQEQLSQVLDAMFER.I |

### Peptide Details

#### SHOW MODIFICATIONS

|              |           |                 |         |          |                                                                                          |
|--------------|-----------|-----------------|---------|----------|------------------------------------------------------------------------------------------|
| Scan         | 4628      | Delta Mass      | -0.0327 | Protein  | IP00063234                                                                               |
| Mass         | 2035.9750 | Next            | 303.000 | Fraction | VF_T13h_band03.mzXML                                                                     |
| Hyper        | 633.000   | Peptide/Prophet | 1.00    | Run      | VF_T13h_band03.pep.xml (Vitor/VF_T13h_band03<br>[VF_SILAC_AssintWindow_NewPL_4da_Human]) |
| Protein Hits | 4         | Ion Percent     | 84%     |          |                                                                                          |
| Charge       | 2+        | B               | 1.000   |          |                                                                                          |

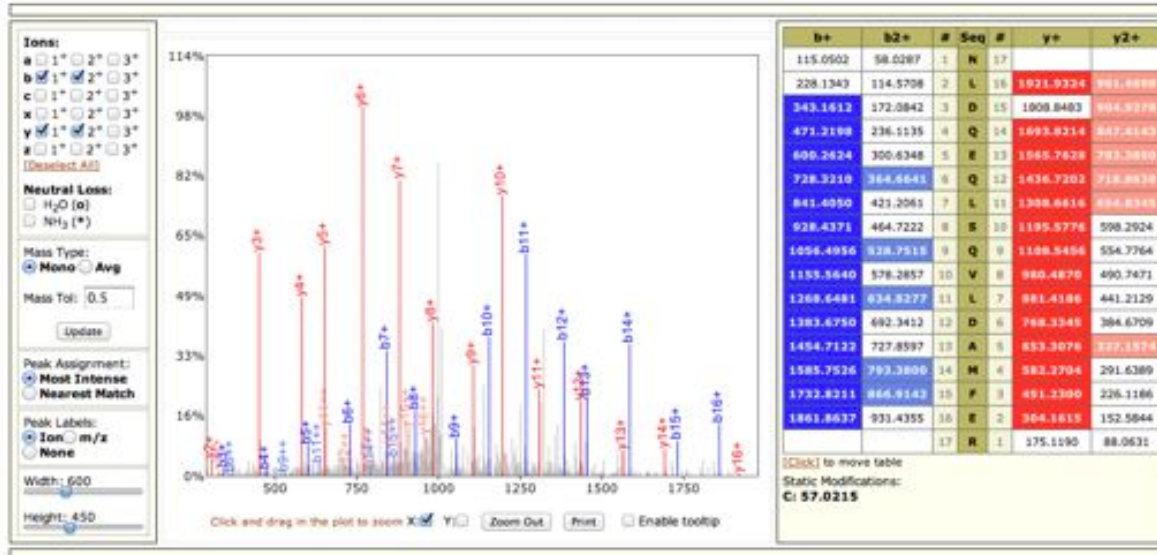

| Protein Probab. | Protein                                                                                     | Tot. Peptides | Unique Peptides | Best Gene Name                                        | Scan# | Charge | Delta Mass | Peptide Prophet Score | Peptide Sequence |
|-----------------|---------------------------------------------------------------------------------------------|---------------|-----------------|-------------------------------------------------------|-------|--------|------------|-----------------------|------------------|
| 0,9880          | IPI00908754,<br>IPI00910592,<br>IPI00015148,<br>IPI00019345,<br>IPI00412525,<br>IPI00877120 | 1             | 1               | -,<br>-,<br>RAP1B,<br>RAP1A,<br>hCG_1757335,<br>RAP1A | 4639  | 2+     | -0,0143    | 1,0000                | K.INVNEIFYDLVR.Q |

### Peptide Details

#### SHOW MODIFICATIONS -

|              |           |                |         |          |                                                                                         |
|--------------|-----------|----------------|---------|----------|-----------------------------------------------------------------------------------------|
| Scan         | 4639      | Delta Mass     | -0.0143 | Protein  | IPI00015148                                                                             |
| Mass         | 1494.7950 | Next           | 298.000 | Fraction | VF_T13h_band03.mzXML                                                                    |
| Hyper        | 625.000   | PeptideProphet | 1.00    | Run      | VF_T13h_band03.pep.xml (Vitor/VF_T13h_band03<br>[VF_SILAC_AssmtWindow_NewPL_4da_Human]) |
| Protein Hits | 6         | Ion Percent    | 91%     |          |                                                                                         |
| Charge       | 2+        | B              | 1.000   |          |                                                                                         |

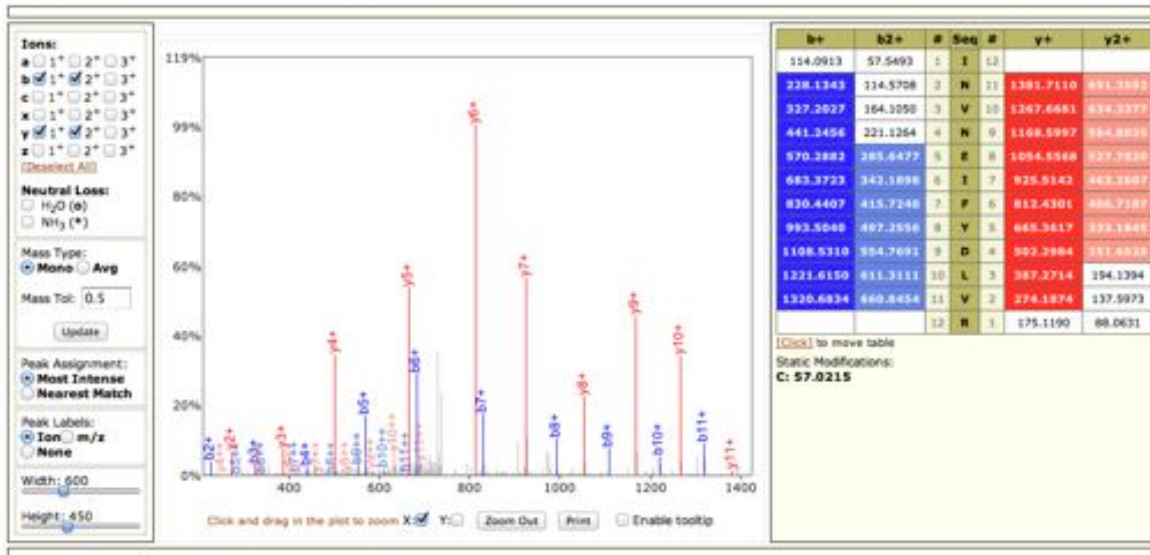



| Protein Probab. | Protein                     | Tot. Peptides | Unique Peptides | Best Gene Name | Scan # | Charge | Delta Mass | Peptide Prophet Score | Peptide Sequence            |
|-----------------|-----------------------------|---------------|-----------------|----------------|--------|--------|------------|-----------------------|-----------------------------|
| 0,9837          | IP100759715,<br>IP100296053 | 1             | 1               | FH,<br>FH      | 4641   | 2+     | -0,0167    | 0,9999                | K.ETAIELGYLTAEQFDEWVK'PK'.D |

### Peptide Details

#### Peptide Details

SHOW MODIFICATIONS

|              |           |                |         |          |                                                                                      |
|--------------|-----------|----------------|---------|----------|--------------------------------------------------------------------------------------|
| Scan         | 4641      | Delta Mass     | -0.0167 | Protein  | IP100296053                                                                          |
| Mass         | 2479.2790 | Next           | 237.000 | Fraction | VF_T13h_band04.mzXML                                                                 |
| Hyper        | 523.000   | PeptideProphet | 1.00    | Run      | VF_T13h_band04.pep.xml (Vitor/VF_T13h_band04 (VF_STLAC_AssimWindow_NewPL_4da_Human)) |
| Protein Hits | 2         | Ion Percent    | 70%     |          |                                                                                      |
| Charge       | 2+        | B              | 1.000   |          |                                                                                      |

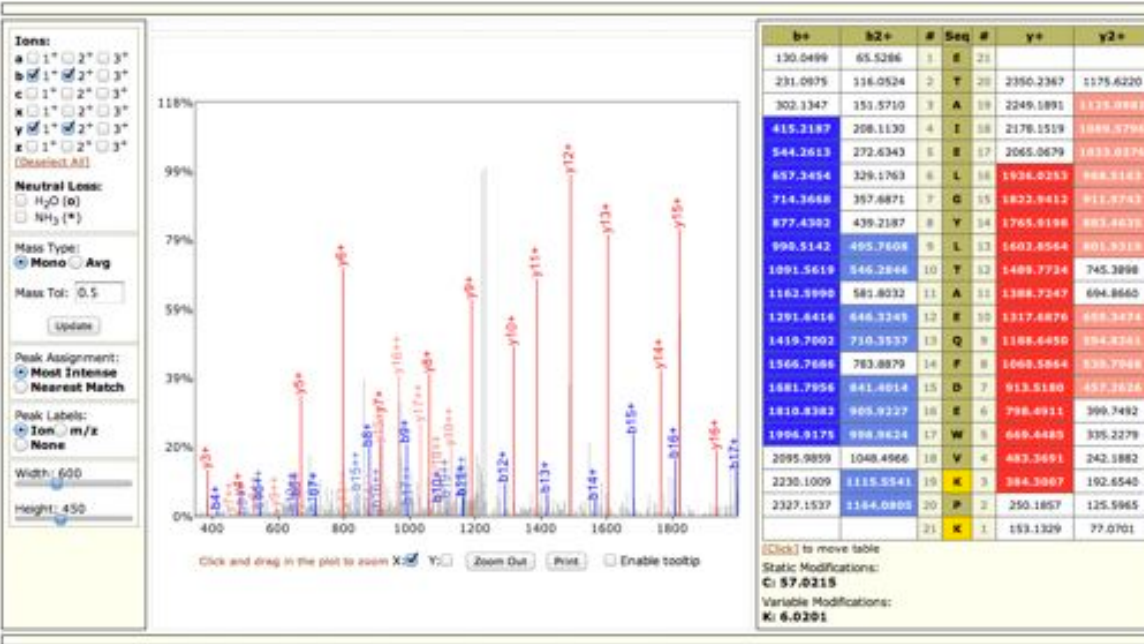



| Protein Probab. | Protein                     | Tot. Peptides | Unique Peptides | Best Gene Name  | Scan # | Charge | Delta Mass | Peptide Prophet Score | Peptide Sequence         |
|-----------------|-----------------------------|---------------|-----------------|-----------------|--------|--------|------------|-----------------------|--------------------------|
| 0,9793          | IPI00644667,<br>IPI00015954 | 1             | 1               | SAR1A,<br>SAR1A | 4689   | 2+     | -0,0076    | 0,9996                | K.NYLPAINGIVFLVDCADHSR.L |

### Peptide Details

#### SHOW MODIFICATIONS

|              |           |                |         |          |                                                                                          |
|--------------|-----------|----------------|---------|----------|------------------------------------------------------------------------------------------|
| Scan         | 4689      | Delta Mass     | -0.0076 | Protein  | IP00015954                                                                               |
| Mass         | 2274.1336 | Next           | 315.000 | Fraction | VF_T13h_band04.mzXML                                                                     |
| Hyper        | 499.000   | PeptideProphet | 1.00    | Run      | VF_T13h_band04.pep.xml (Vitor/VF_T13h_band04<br>(VF_SILAC_AssimtWindow_NewPL_4da_Human)) |
| Protein Hits | 2         | Ion Percent    | 79%     |          |                                                                                          |
| Charge       | 2+        | B              | 1.000   |          |                                                                                          |

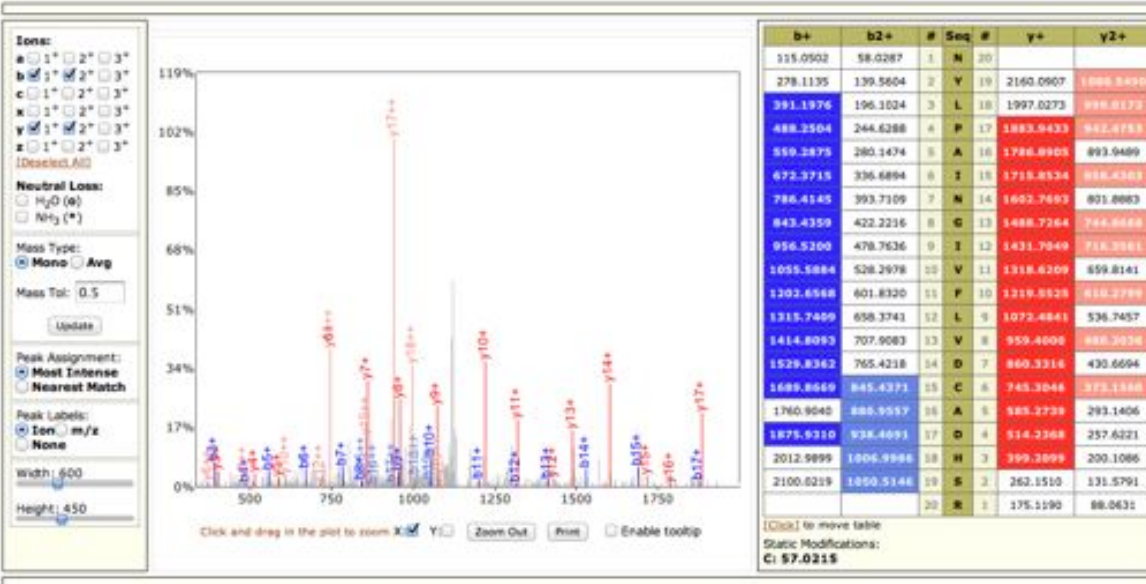

| Protein Probab. | Protein                     | Tot. Peptides | Unique Peptides | Best Gene Name    | Scan # | Charge | Delta Mass | Peptide Prophet Score | Peptide Sequence                      |
|-----------------|-----------------------------|---------------|-----------------|-------------------|--------|--------|------------|-----------------------|---------------------------------------|
| 0,9636          | IPI00642725,<br>IPI00010133 | 1             | 1               | CORO1A,<br>CORO1A | 4712   | 3+     | +1,9261    | 0,9985                | K.HLEEPLSLQELDTSSGVLLPFFDPTNIVYLCGK.G |

Peptide Details

|                            |                       |                                                    |
|----------------------------|-----------------------|----------------------------------------------------|
| <b>SHOW MODIFICATIONS:</b> |                       | Protein: IPI00010133                               |
| Scan: 4712                 | Delta Mass: +1.9261   | Fraction: VP_T13P_ban04.mzXML                      |
| Mass: 3846.9150            | Neat: 373.000         | Run: VP_T13P_ban04.pep.xml (/Volumes/VP_T13P_ban04 |
| Mapper: 536.000            | Peptide/Prophet: 1.00 | (\VP_SILAC_AssessWindow_NewPL_Ada_Human())         |
| Protein Hits: 2            | Ion Percent: 43%      |                                                    |
| Charge: 3+                 | B: 1.000              |                                                    |

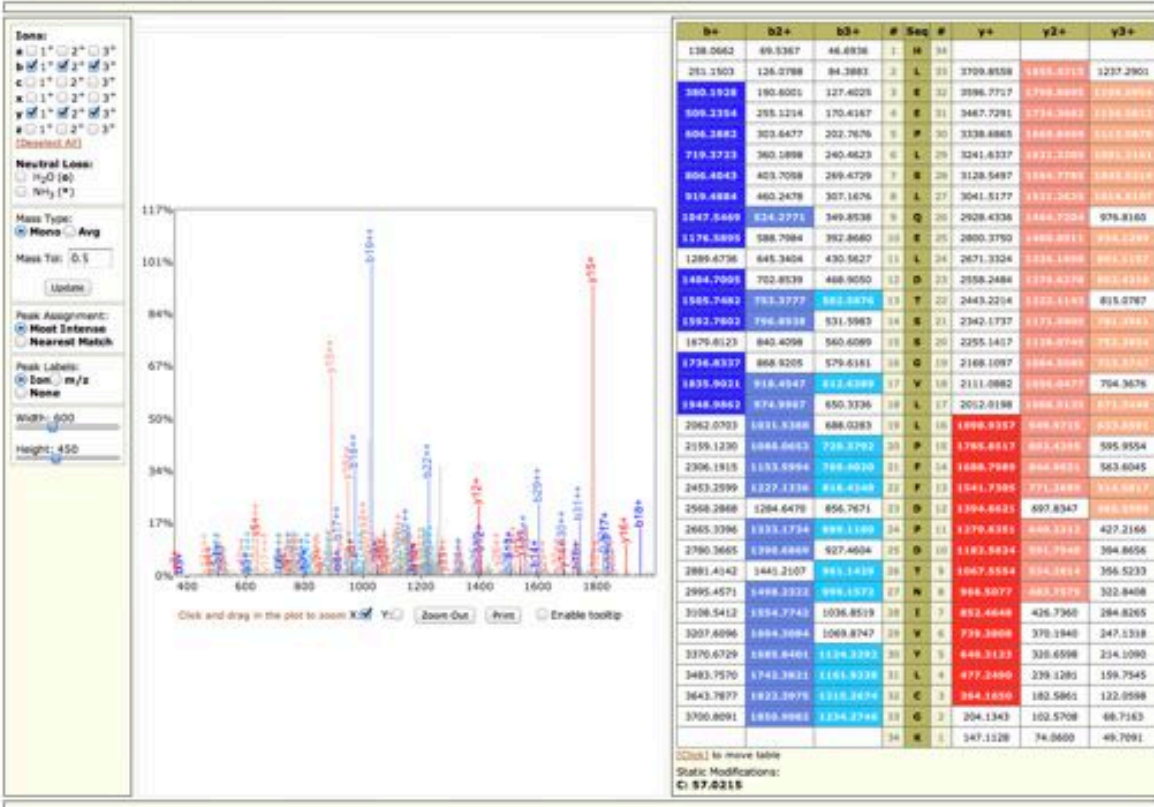

Supplement: supp_M112.019661_mcp.M112.019661-5.pdf [file supp_M112.019661_mcp.M112.019661-5.pdf]
