# Supplementary material
Source: PubMed Central journal article supplement (PMC3518132)
Supplement: supp_M112.019661_mcp.M112.019661-4.pdf [file supp_M112.019661_mcp.M112.019661-4.pdf]

```
<bioml>
<note label="residue, potential modification mass" type="input">15.99491@M,6.020129@K</note>
<note label="residue, modification mass" type="input">57.02146@C</note>
<note label="protein, cleavage site" type="input">[KR]|{P}</note>
<note label="pipeline quantitation, residue label mass" type="input">6.020129@K</note>
<note label="pipeline quantitation, algorithm" type="input">q3</note>
<note label="pipeline quantitation, max fractional delta mass" type="input">20</note>
<note label="pipeline quantitation, min peptide prophet" type="input">0.5</note>
<note label="spectrum, parent monoisotopic mass error plus" type="input">3.5</note>
<note label="spectrum, parent monoisotopic mass error minus" type="input">0.5</note>
<note label="scoring, algorithm" type="input">k-score</note>
<note label="spectrum, use conditioning" type="input">no</note>
<note label="scoring, minimum ion count" type="input">1</note>
<note label="pipeline, protocol name" type="input">VF_SILAC_AssimtWindow_NewPL_4da_Human</note>
<note label="pipeline, protocol description" type="input">VF_SILAC_AssimtWindow_NewPL_4da_Human</note>
<note label="pipeline, database" type="input">2008/IPI/ipi.HUMAN.v3.52.fasta</note>
</bioml>
```
